# Supplementary material for: Emergent trees in Colophospermum mopane woodland: influence of elephant density on persistence versus attrition
Source: PeerJ. 2024 Feb 26;12:e16961. doi: 10.7717/peerj.16961 (PMC10903334; doi:10.7717/peerj.16961)
Supplement: Data S4 — This data set is used in conjunction with the tree and shrub data sets for Malilangwe in 2001 and 2014, and Gonarezhou tree data in 2014, for the production of Figure 2. [file peerj-12-16961-s007.xlsx]

## Sheet: Site1
Date:	22/8/2014													Total	T	C	%C
Site No. :	GNP2												Col mop	36	30	6	16.6667
			Trans 1										ALL SPECIES	58	52	6	10.3448
			Width (m)	Length (m)	Area (ha)				Width (m)	Length (m)	Area (ha)		Shrub density (no/ha)	773.333
	Transect Dimensions:		15	50	0.075
	Co-ordinates:			X	Y					X	Y
			NW Corner						NW Corner
			SW Corner						SW Corner
			NE Corner						NE Corner
			SE Corner						SE Corner
									OED		OUD	NED		NUD	NFD	OFD	OBE	OBU	NBE	NBU	RE	Notes	Canopy volume (m3)																				Damage
Trans. No.	Sp. Code	Coppice	Height (m)	D1 (m)	D2 (m)	R	Shape	Adj. shape	Score	Eaten		Score	Eaten										Total	0.5	1	2	3	4	5	0.5	1	2	3	4	5	OED	OUD	NED	NUD	NFD	OFD	Old Rec. Vol.	OED	OUD	NED	NUD	NFD	OFD	Sp. Code
1	Thy afr	T	2.9	2.5	1.9	1.1	3	3	2		1												3.67094	1.5902	2.63855	3.56122	3.67109	3.87128	5.06487	1.5902	2.63855	3.56122	3.67094	3.67094	3.67094	18	5.5	0	0	0	0	4.79862	86.3751	26.3924	0	0	0	0	Thy afr
1	Sal per	T	0.3	0.15	0.2	0.0875	7	7			2												0.0065129	-0.0128409	-0.486878	-5.92686	-22.5868	-56.7436	-114.674	0.0065129	0.0065129	0.0065129	0.0065129	0.0065129	0.0065129	0	18	0	0	0	0	0.00794256	0	0.142966	0	0	0	0	Sal per
1	Bos mos	T	1.3	2.3	2.4	1.175	3	3			1												1.87764	1.44007	1.85457	2.17079	6.07649	18.6995	45.1677	1.44007	1.85457	1.87764	1.87764	1.87764	1.87764	0	5.5	0	0	0	0	1.98692	0	10.9281	0	0	0	0	Bos mos
1	Cou gla	T	0.6	0.6	0.5	0.275	3	3															0.0474691	0.0472493	0.061534	0.650502	3.08549	8.68508	18.7679	0.0472493	0.0474691	0.0474691	0.0474691	0.0474691	0.0474691	0	0	0	0	0	0	0.0474691	0	0	0	0	0	0	Cou gla
1	Col mop	T	2.8	1.85	1.5	0.8375	3	3	2														2.05457	0.915817	1.50873	2.00665	2.05532	2.2163	3.05116	0.915817	1.50873	2.00665	2.05457	2.05457	2.05457	18	0	0	0	0	0	2.50558	45.1004	0	0	0	0	0	Col mop
1	Sec vir	T	0.55	0.5	0.25	0.1875	3	3			1												0.0202283	0.0202131	0.0313075	0.390888	1.80824	5.01285	10.7342	0.0202131	0.0202283	0.0202283	0.0202283	0.0202283	0.0202283	0	5.5	0	0	0	0	0.0214056	0	0.117731	0	0	0	0	Sec vir
1	Pav gra	T	0.9	0.5	0.4	0.225	3	3															0.0476652	0.0434806	0.0477306	0.134692	0.65319	1.99553	4.55402	0.0434806	0.0476652	0.0476652	0.0476652	0.0476652	0.0476652	0	0	0	0	0	0	0.0476652	0	0	0	0	0	0	Pav gra
1	Cou gla	T	0.7	1.1	0.57	0.4175	1	1															0.383319	0.2738	0.547599	1.0952	1.6428	2.1904	2.738	0.2738	0.383319	0.383319	0.383319	0.383319	0.383319	0	0	0	0	0	0	0.383319	0	0	0	0	0	0	Cou gla
1	Gry mos	T	1.5	3.3	2.3	1.4	2	2	2														3.07568	0.113914	0.911313	7.29051	24.6055	58.324	113.914	0.113914	0.911313	3.07568	3.07568	3.07568	3.07568	18	0	0	0	0	0	3.75083	67.515	0	0	0	0	0	Gry mos
1	Sec vir	T	3	3	2.5	1.375	3	3	2			1											5.93363	2.49982	4.17552	5.71387	5.93363	6.1534	7.69175	2.49982	4.17552	5.71387	5.93363	5.93363	5.93363	18	0	5.5	0	0	0	7.23614	130.251	0	34.5344	0	0	0	Sec vir
1	Thy afr	T	1.15	0.7	0.6	0.325	3	3			1												0.127075	0.104129	0.126793	0.178387	0.656105	2.06127	4.8952	0.104129	0.126793	0.127075	0.127075	0.127075	0.127075	0	5.5	0	0	0	0	0.13447	0	0.739587	0	0	0	0	Thy afr
1	Col mop	T	2.1	2	1.55	0.8875	1	1	3			1											5.19644	1.23725	2.4745	4.94899	7.42349	9.89798	12.3725	1.23725	2.4745	4.94899	5.19644	5.19644	5.19644	38	0	5.5	0	0	0	8.38135	318.491	0	30.2438	0	0	0	Col mop
1	Col mop	T	2.5	2.2	2.7	1.225	1	1	3			2											11.7859	2.35718	4.71435	9.4287	14.1431	18.8574	23.5718	2.35718	4.71435	9.4287	11.7859	11.7859	11.7859	38	0	18	0	0	0	19.0095	722.36	0	258.714	0	0	0	Col mop
1	Col mop	C	3	2.2	1.8	1	1	1	3			1											9.42478	1.5708	3.14159	6.28319	9.42478	12.5664	15.708	1.5708	3.14159	6.28319	9.42478	9.42478	9.42478	38	0	5.5	0	0	0	15.2013	577.648	0	54.8532	0	0	0	Col mop
1	Col mop	C	3	4.25	1.9	1.5375	2	2	3			1											7.419	0.0343472	0.274778	2.19822	7.419	17.5858	34.3472	0.0343472	0.274778	2.19822	7.419	7.419	7.419	38	0	5.5	0	0	0	11.9661	454.713	0	43.1794	0	0	0	Col mop
1	Col mop	T	0.6	0.95	0.8	0.4375	1	1			1												0.360792	0.30066	0.60132	1.20264	1.80396	2.40528	3.0066	0.30066	0.360792	0.360792	0.360792	0.360792	0.360792	0	5.5	0	0	0	0	0.381791	0	2.09985	0	0	0	0	Col mop
1	Col mop	T	0.45	0.95	0.65	0.4	1	1															0.226195	0.251327	0.502655	1.00531	1.50796	2.01062	2.51327	0.226195	0.226195	0.226195	0.226195	0.226195	0.226195	0	0	0	0	0	0	0.226195	0	0	0	0	0	0	Col mop
1	Col mop	C	3	3.7	3.1	1.7	1	1	3			1											27.2376	4.5396	9.0792	18.1584	27.2376	36.3168	45.396	4.5396	9.0792	18.1584	27.2376	27.2376	27.2376	38	0	5.5	0	0	0	43.9316	1669.4	0	158.526	0	0	0	Col mop
1	Str mad	T	0.3	0.7	0.48	0.295	1	1			1												0.0820191	0.136699	0.273397	0.546794	0.820191	1.09359	1.36699	0.0820191	0.0820191	0.0820191	0.0820191	0.0820191	0.0820191	0	5.5	0	0	0	0	0.0867927	0	0.47736	0	0	0	0	Str mad
1	Col mop	T	2.7	2.3	2.3	1.15	1	1	3			1											11.2178	2.07738	4.15476	8.30951	12.4643	16.619	20.7738	2.07738	4.15476	8.30951	11.2178	11.2178	11.2178	38	0	5.5	0	0	0	18.0933	687.545	0	65.289	0	0	0	Col mop
1	Col mop	T	2.5	2.5	2.8	1.325	1	1	3			1											13.7886	2.75773	5.51546	11.0309	16.5464	22.0618	27.5773	2.75773	5.51546	11.0309	13.7886	13.7886	13.7886	38	0	5.5	0	0	0	22.2398	845.111	0	80.2514	0	0	0	Col mop
1	Sec vir	T	0.9	1.35	1.1	0.6125	3	3			3												0.353223	0.322213	0.353707	0.998133	4.84046	14.7879	33.7476	0.322213	0.353223	0.353223	0.353223	0.353223	0.353223	0	38	0	0	0	0	0.569714	0	21.6491	0	0	0	0	Sec vir
1	Col mop	T	1.8	2.25	2.2	1.1125	1	1	3														6.99878	1.94411	3.88821	7.77642	11.6646	15.5528	19.4411	1.94411	3.88821	6.99878	6.99878	6.99878	6.99878	38	0	0	0	0	0	11.2884	428.958	0	0	0	0	0	Col mop
1	Col mop	T	3	2.6	2.8	1.35	1	1	3			1											17.1767	2.86278	5.72555	11.4511	17.1767	22.9022	28.6278	2.86278	5.72555	11.4511	17.1767	17.1767	17.1767	38	0	5.5	0	0	0	27.7043	1052.76	0	99.97	0	0	0	Col mop
1	Col mop	T	2.3	2.3	2.02	1.08	1	1	3			1											8.42801	1.83218	3.66435	7.32871	10.9931	14.6574	18.3218	1.83218	3.66435	7.32871	8.42801	8.42801	8.42801	38	0	5.5	0	0	0	13.5936	516.556	0	49.0519	0	0	0	Col mop
1	Bos mos	T	0.5	0.6	0.35	0.2375	3	3			1												0.0295047	0.0295047	0.0590094	0.826132	3.71759	10.1496	21.5384	0.0295047	0.0295047	0.0295047	0.0295047	0.0295047	0.0295047	0	5.5	0	0	0	0	0.0312219	0	0.171721	0	0	0	0	Bos mos
1	Col mop	T	1.8	2.5	2.3	1.2	1	1	2			1											8.14301	2.26195	4.52389	9.04779	13.5717	18.0956	22.6195	2.26195	4.52389	8.14301	8.14301	8.14301	8.14301	18	0	5.5	0	0	0	9.9305	178.749	0	47.3932	0	0	0	Col mop
1	Col mop	T	2.8	2.55	2.4	1.2375	1	1	2			1											13.471	2.40553	4.81105	9.62211	14.4332	19.2442	24.0553	2.40553	4.81105	9.62211	13.471	13.471	13.471	18	0	5.5	0	0	0	16.428	295.704	0	78.4024	0	0	0	Col mop
1	Col mop	T	2.6	1.3	1.4	0.675	1	1	2														3.72161	0.715694	1.43139	2.86278	4.29416	5.72555	7.15694	0.715694	1.43139	2.86278	3.72161	3.72161	3.72161	18	0	0	0	0	0	4.53855	81.6939	0	0	0	0	0	Col mop
1	Col mop	T	2.2	2.55	2.7	1.3125	1	1	3			1											11.9061	2.70594	5.41188	10.8238	16.2357	21.6475	27.0594	2.70594	5.41188	10.8238	11.9061	11.9061	11.9061	38	0	5.5	0	0	0	19.2035	729.731	0	69.295	0	0	0	Col mop
1	Col mop	C	3	2.2	3.8	1.5	1	1	4			1											21.2058	3.53429	7.06858	14.1372	21.2058	28.2743	35.3429	3.53429	7.06858	14.1372	21.2058	21.2058	21.2058	63	0	5.5	0	0	0	57.3128	3610.71	0	123.42	0	0	0	Col mop
1	Col mop	T	2.4	2.25	2.2	1.1125	1	1	3														9.33171	1.94411	3.88821	7.77642	11.6646	15.5528	19.4411	1.94411	3.88821	7.77642	9.33171	9.33171	9.33171	38	0	0	0	0	0	15.0511	571.943	0	0	0	0	0	Col mop
1	Col mop	T	3	2.95	2.15	1.275	1	1	2			1											15.3212	2.55353	5.10705	10.2141	15.3212	20.4282	25.5353	2.55353	5.10705	10.2141	15.3212	15.3212	15.3212	18	0	5.5	0	0	0	18.6843	336.318	0	89.1707	0	0	0	Col mop
1	Col mop	T	2.1	2	1.35	0.8375	1	1	3			1											4.62742	1.10177	2.20353	4.40707	6.6106	8.81413	11.0177	1.10177	2.20353	4.40707	4.62742	4.62742	4.62742	38	0	5.5	0	0	0	7.46358	283.616	0	26.9321	0	0	0	Col mop
1	Sec vir	T	1.2	0.8	0.8	0.4	3	3			1												0.200861	0.160991	0.199931	0.260375	0.878766	2.75254	6.57912	0.160991	0.199931	0.200861	0.200861	0.200861	0.200861	0	5.5	0	0	0	0	0.212551	0	1.16903	0	0	0	0	Sec vir
1	Col mop	T	0.9	2	1.5	0.875	1	1			1												2.16475	1.20264	2.40528	4.81056	7.21585	9.62113	12.0264	1.20264	2.16475	2.16475	2.16475	2.16475	2.16475	0	5.5	0	0	0	0	2.29074	0	12.5991	0	0	0	0	Col mop
1	Col mop	T	0.4	0.6	0.6	0.3	1	1			1												0.113097	0.141372	0.282743	0.565487	0.84823	1.13097	1.41372	0.113097	0.113097	0.113097	0.113097	0.113097	0.113097	0	5.5	0	0	0	0	0.11968	0	0.658238	0	0	0	0	Col mop
1	Mae par	T	0.3	0.2	0.18	0.095	3	3			1												0.00283245	0.0036717	0.0388151	0.518234	2.06769	5.31662	10.8944	0.00283245	0.00283245	0.00283245	0.00283245	0.00283245	0.00283245	0	5.5	0	0	0	0	0.0029973	0	0.0164852	0	0	0	0	Mae par
1	Mae par	T	0.4	0.25	0.1	0.0875	3	3			1												0.00320384	0.0032539	0.0140168	0.208249	0.883057	2.3388	4.87584	0.00320384	0.00320384	0.00320384	0.00320384	0.00320384	0.00320384	0	5.5	0	0	0	0	0.0033903	0	0.0186467	0	0	0	0	Mae par
1	Col mop	C	2.7	2.9	2.8	1.425	1	1	3		1												17.2244	3.1897	6.3794	12.7588	19.1382	25.5176	31.897	3.1897	6.3794	12.7588	17.2244	17.2244	17.2244	38	5.5	0	0	0	0	30.4856	1158.45	167.671	0	0	0	0	Col mop
1	Col mop	T	0.4	0.35	0.6	0.2375	1	1			1												0.0708822	0.0886027	0.177205	0.354411	0.531616	0.708822	0.886027	0.0708822	0.0708822	0.0708822	0.0708822	0.0708822	0.0708822	0	5.5	0	0	0	0	0.0750076	0	0.412542	0	0	0	0	Col mop
1	Col mop	T	0.3	0.35	0.3	0.1625	1	1			1												0.0248873	0.0414788	0.0829577	0.165915	0.248873	0.331831	0.414788	0.0248873	0.0248873	0.0248873	0.0248873	0.0248873	0.0248873	0	5.5	0	0	0	0	0.0263358	0	0.144847	0	0	0	0	Col mop
1	Col mop	T	0.15	0.3	0.2	0.125	1	1			1												0.00736311	0.0245437	0.0490874	0.0981748	0.147262	0.19635	0.245437	0.00736311	0.00736311	0.00736311	0.00736311	0.00736311	0.00736311	0	5.5	0	0	0	0	0.00779165	0	0.0428541	0	0	0	0	Col mop
1	Col mop	T	0.35	0.45	0.3	0.1875	1	1			1												0.0386563	0.0552233	0.110447	0.220893	0.33134	0.441786	0.552233	0.0386563	0.0386563	0.0386563	0.0386563	0.0386563	0.0386563	0	5.5	0	0	0	0	0.0409062	0	0.224984	0	0	0	0	Col mop
1	Mae par	T	0.4	0.15	0.2	0.0875	3	3			1												0.00320384	0.0032539	0.0140168	0.208249	0.883057	2.3388	4.87584	0.00320384	0.00320384	0.00320384	0.00320384	0.00320384	0.00320384	0	5.5	0	0	0	0	0.0033903	0	0.0186467	0	0	0	0	Mae par
1	Mae par	T	0.35	0.08	0.07	0.0375	2	2			1												0.000514902	0.00150117	0.0120094	0.096075	0.324253	0.7686	1.50117	0.000514902	0.000514902	0.000514902	0.000514902	0.000514902	0.000514902	0	5.5	0	0	0	0	0.00054487	0	0.00299678	0	0	0	0	Mae par
1	Mae par	T	0.3	0.06	0.05	0.0275	1	1			1												0.000712749	0.00118791	0.00237583	0.00475166	0.00712749	0.00950332	0.0118791	0.000712749	0.000712749	0.000712749	0.000712749	0.000712749	0.000712749	0	5.5	0	0	0	0	0.000754232	0	0.00414827	0	0	0	0	Mae par
1	Bos mos	T	2	3.3	3.28	1.645	1	1			1												17.0025	4.25061	8.50123	17.0025	25.5037	34.0049	42.5061	4.25061	8.50123	17.0025	17.0025	17.0025	17.0025	0	5.5	0	0	0	0	17.992	0	98.9561	0	0	0	0	Bos mos
1	Thy afr	T	0.5	0.35	0.35	0.175	1	1															0.0481056	0.0481056	0.0962113	0.192423	0.288634	0.384845	0.481056	0.0481056	0.0481056	0.0481056	0.0481056	0.0481056	0.0481056	0	0	0	0	0	0	0.0481056	0	0	0	0	0	0	Thy afr
1	Col mop	C	3	2.3	2.15	1.1125	1	1	2		1												11.6646	1.94411	3.88821	7.77642	11.6646	15.5528	19.4411	1.94411	3.88821	7.77642	11.6646	11.6646	11.6646	18	5.5	0	0	0	0	15.2479	274.462	83.8634	0	0	0	0	Col mop
1	Col mop	T	0.4	0.35	0.25	0.15	1	1			1												0.0282743	0.0353429	0.0706858	0.141372	0.212058	0.282743	0.353429	0.0282743	0.0282743	0.0282743	0.0282743	0.0282743	0.0282743	0	5.5	0	0	0	0	0.0299199	0	0.16456	0	0	0	0	Col mop
1	Mae par	T	0.1	0.2	0.15	0.0875	3	3															0.000800959	0.0520623	0.5847	5.49458	19.5354	47.5129	94.2328	0.000800959	0.000800959	0.000800959	0.000800959	0.000800959	0.000800959	0	0	0	0	0	0	0.000800959	0	0	0	0	0	0	Mae par
1	Col mop	T	0.4	0.55	0.4	0.2375	3	3			1												0.0236038	0.0239726	0.103266	1.53424	6.50579	17.2308	35.922	0.0236038	0.0236038	0.0236038	0.0236038	0.0236038	0.0236038	0	5.5	0	0	0	0	0.0249775	0	0.137376	0	0	0	0	Col mop
1	Col mop	T	0.6	0.9	0.7	0.4	1	1															0.301593	0.251327	0.502655	1.00531	1.50796	2.01062	2.51327	0.251327	0.301593	0.301593	0.301593	0.301593	0.301593	0	0	0	0	0	0	0.301593	0	0	0	0	0	0	Col mop
1	Col mop	T	0.15	0.25	0.25	0.125	1	1															0.00736311	0.0245437	0.0490874	0.0981748	0.147262	0.19635	0.245437	0.00736311	0.00736311	0.00736311	0.00736311	0.00736311	0.00736311	0	0	0	0	0	0	0.00736311	0	0	0	0	0	0	Col mop
1	Col mop	T	0.2	0.25	0.2	0.1125	1	1			1												0.00795216	0.0198804	0.0397608	0.0795216	0.119282	0.159043	0.198804	0.00795216	0.00795216	0.00795216	0.00795216	0.00795216	0.00795216	0	5.5	0	0	0	0	0.00841498	0	0.0462824	0	0	0	0	Col mop
1	Col mop	T	0.5	0.6	0.25	0.2125	3	3															0.0236201	0.0236201	0.0472402	0.661363	2.97613	8.12532	17.2427	0.0236201	0.0236201	0.0236201	0.0236201	0.0236201	0.0236201	0	0	0	0	0	0	0.0236201	0	0	0	0	0	0	Col mop
1	Col mop	T	3	2.9	3.35	1.5625	1	1	2			1											23.0097	3.83495	7.6699	15.3398	23.0097	30.6796	38.3495	3.83495	7.6699	15.3398	23.0097	23.0097	23.0097	18	0	5.5	0	0	0	28.0606	505.091	0	133.919	0	0	0	Col mop
[truncated: 34 more columns]

## Sheet: Site2
Date:	22/8/2014													Total	T	C	%C
Site No. :	GNP3												Col mop	21	19	2	9.52381
			Trans 1 for all other species						Trans 1a for Mae par				ALL SPECIES 1	13	13	0	0
			Width (m)	Length (m)	Area (ha)				Width (m)	Length (m)	Area (ha)		Shrub density (no/ha) 1	173.333
	Transect Dimensions:		15	50	0.075				15	25	0.0375		ALL SPECIES 1a	24	22	2	8.33333
													Shrub density (no/ha) 1a	640
	Co-ordinates:			X	Y					X	Y		TOTAL Shrub density (no/ha)	813.333
			NW Corner						NW Corner
			SW Corner						SW Corner
			NE Corner						NE Corner
			SE Corner						SE Corner
									OED		OUD	NED		NUD	NFD	OFD	OBE	OBU	NBE	NBU	RE	Notes	Canopy volume (m3)																				Damage
Trans. No.	Sp. Code	Coppice	Height (m)	D1 (m)	D2 (m)	R	Shape	Adj. shape	Score	Eaten		Score	Eaten										Total	0.5	1	2	3	4	5	0.5	1	2	3	4	5	OED	OUD	NED	NUD	NFD	OFD	Old Rec. Vol.	OED	OUD	NED	NUD	NFD	OFD	Sp. Code
1a	Mae par	T	0.2	0.18	0.1	0.07	3	3			2	1											0.00102523	0.00448537	0.0666398	0.748416	2.81425	7.03306	14.1738	0.00102523	0.00102523	0.00102523	0.00102523	0.00102523	0.00102523	0	18	5.5	0	0	0	0.00125028	0	0.022505	0.00596693	0	0	0	Mae par
1a	Mae par	T	0.25	0.2	0.35	0.1375	3	3			2												0.0049447	0.00988939	0.138451	1.70098	6.58633	16.6933	33.9206	0.0049447	0.0049447	0.0049447	0.0049447	0.0049447	0.0049447	0	18	0	0	0	0	0.00603012	0	0.108542	0	0	0	0	Mae par
1a	Mae par	T	0.2	0.1	0.1	0.05	3	3			2												0.000523075	0.00228845	0.0339999	0.381845	1.43584	3.5883	7.23151	0.000523075	0.000523075	0.000523075	0.000523075	0.000523075	0.000523075	0	18	0	0	0	0	0.000637897	0	0.0114821	0	0	0	0	Mae par
1a	Mae par	T	0.1	0.14	0.2	0.085	3	3			4												0.000755844	0.0491298	0.551766	5.18509	18.435	44.8366	88.925	0.000755844	0.000755844	0.000755844	0.000755844	0.000755844	0.000755844	0	63	0	0	0	0	0.00204282	0	0.128698	0	0	0	0	Mae par
1a	Mae par	T	0.15	0.3	0.05	0.0875	3	3			2												0.00120144	0.0164642	0.219819	2.25514	8.24187	20.3159	40.6131	0.00120144	0.00120144	0.00120144	0.00120144	0.00120144	0.00120144	0	18	0	0	0	0	0.00146517	0	0.026373	0	0	0	0	Mae par
1a	Mae par	T	0.15	0.3	0.1	0.1	3	3			2												0.00156923	0.0215042	0.28711	2.94549	10.7649	26.535	53.0456	0.00156923	0.00156923	0.00156923	0.00156923	0.00156923	0.00156923	0	18	0	0	0	0	0.00191369	0	0.0344464	0	0	0	0	Mae par
1a	Mae par	T	0.2	0.37	0.25	0.155	3	3			4												0.00502675	0.021992	0.326739	3.66953	13.7984	34.4835	69.4949	0.00502675	0.00502675	0.00502675	0.00502675	0.00502675	0.00502675	0	63	0	0	0	0	0.0135858	0	0.855906	0	0	0	0	Mae par
1a	Mae par	T	0.25	0.7	0.25	0.2375	3	3			2												0.0147524	0.0295047	0.413066	5.07481	19.6501	49.8039	101.201	0.0147524	0.0147524	0.0147524	0.0147524	0.0147524	0.0147524	0	18	0	0	0	0	0.0179907	0	0.323832	0	0	0	0	Mae par
1a	Col mop	T	0.4	1.05	0.74	0.4475	3	3			1												0.0837993	0.0851086	0.366622	5.44695	23.0972	61.1735	127.532	0.0837993	0.0837993	0.0837993	0.0837993	0.0837993	0.0837993	0	5.5	0	0	0	0	0.0886765	0	0.487721	0	0	0	0	Col mop
1a	Col mop	T	0.6	1.3	0.85	0.5375	1	1	3														0.544575	0.453813	0.907626	1.81525	2.72288	3.6305	4.53813	0.453813	0.544575	0.544575	0.544575	0.544575	0.544575	38	0	0	0	0	0	0.878348	33.3772	0	0	0	0	0	Col mop
1a	Mae par	T	0.35	1	0.3	0.325	1	1			3												0.116141	0.165915	0.331831	0.663661	0.995492	1.32732	1.65915	0.116141	0.116141	0.116141	0.116141	0.116141	0.116141	0	38	0	0	0	0	0.187324	0	7.1183	0	0	0	0	Mae par
1a	Col mop	T	0.1	0.35	0.15	0.125	1	1	1														0.00490874	0.0245437	0.0490874	0.0981748	0.147262	0.19635	0.245437	0.00490874	0.00490874	0.00490874	0.00490874	0.00490874	0.00490874	5.5	0	0	0	0	0	0.00519443	0.0285694	0	0	0	0	0	Col mop
1a	Col mop	T	0.15	0.15	0.05	0.05	1	1			1												0.0011781	0.00392699	0.00785398	0.015708	0.0235619	0.0314159	0.0392699	0.0011781	0.0011781	0.0011781	0.0011781	0.0011781	0.0011781	0	5.5	0	0	0	0	0.00124666	0	0.00685665	0	0	0	0	Col mop
1a	Col mop	T	0.1	0.13	0.05	0.045	1	1			1												0.000636173	0.00318086	0.00636173	0.0127235	0.0190852	0.0254469	0.0318086	0.000636173	0.000636173	0.000636173	0.000636173	0.000636173	0.000636173	0	5.5	0	0	0	0	0.000673198	0	0.00370259	0	0	0	0	Col mop
1a	Mae par	T	0.15	0.42	0.18	0.15	1	1			1												0.0106029	0.0353429	0.0706858	0.141372	0.212058	0.282743	0.353429	0.0106029	0.0106029	0.0106029	0.0106029	0.0106029	0.0106029	0	5.5	0	0	0	0	0.01122	0	0.0617099	0	0	0	0	Mae par
1a	Col mop	T	0.15	0.2	0.1	0.075	1	1			1												0.00265072	0.00883573	0.0176715	0.0353429	0.0530144	0.0706858	0.0883573	0.00265072	0.00265072	0.00265072	0.00265072	0.00265072	0.00265072	0	5.5	0	0	0	0	0.00280499	0	0.0154275	0	0	0	0	Col mop
1a	Col mop	T	0.1	0.18	0.1	0.07	1	1			1												0.00153938	0.0076969	0.0153938	0.0307876	0.0461814	0.0615752	0.076969	0.00153938	0.00153938	0.00153938	0.00153938	0.00153938	0.00153938	0	5.5	0	0	0	0	0.00162897	0	0.00895936	0	0	0	0	Col mop
1a	Thy afr	T	1.2	0.3	1.4	0.425	3	3			1												0.226753	0.181744	0.225703	0.293939	0.992045	3.10736	7.42721	0.181744	0.225703	0.226753	0.226753	0.226753	0.226753	0	5.5	0	0	0	0	0.23995	0	1.31973	0	0	0	0	Thy afr
1a	Mae par	T	0.8	0.35	0.25	0.15	3	3			1												0.0188307	0.0178377	0.0191249	0.0823843	0.410451	1.224	2.74369	0.0178377	0.0188307	0.0188307	0.0188307	0.0188307	0.0188307	0	5.5	0	0	0	0	0.0199267	0	0.109597	0	0	0	0	Mae par
1a	Col mop	C	2.6	2.68	2.1	1.195	1	1	3			2											11.6643	2.24314	4.48627	8.97255	13.4588	17.9451	22.4314	2.24314	4.48627	8.97255	11.6643	11.6643	11.6643	38	0	18	0	0	0	18.8134	714.909	0	256.046	0	0	0	Col mop
1a	Col mop	T	0.7	1.15	0.75	0.475	1	1	4			1											0.496175	0.354411	0.708822	1.41764	2.12647	2.83529	3.54411	0.354411	0.496175	0.496175	0.496175	0.496175	0.496175	63	0	5.5	0	0	0	1.34101	84.4839	0	2.88779	0	0	0	Col mop
1a	Col mop	T	2.7	1.3	1.5	0.7	1	1	3			2											4.15633	0.76969	1.53938	3.07876	4.61814	6.15752	7.6969	0.76969	1.53938	3.07876	4.15633	4.15633	4.15633	38	0	18	0	0	0	6.70375	254.743	0	91.2364	0	0	0	Col mop
1a	Col mop	T	1.15	1.2	1.2	0.6	1	1	3														1.30062	0.565487	1.13097	2.26195	3.39292	4.52389	5.65487	0.565487	1.13097	1.30062	1.30062	1.30062	1.30062	38	0	0	0	0	0	2.09777	79.7154	0	0	0	0	0	Col mop
1a	Col mop	C	2.9	2	2.25	1.0625	1	1	4			2											10.285	1.77328	3.54656	7.09313	10.6397	14.1863	17.7328	1.77328	3.54656	7.09313	10.285	10.285	10.285	63	0	18	0	0	0	27.7974	1751.24	0	225.769	0	0	0	Col mop
1	Cou gla	T	0.8	1.3	1.25	0.6375	1	1															1.02141	0.638381	1.27676	2.55353	3.83029	5.10705	6.38381	0.638381	1.02141	1.02141	1.02141	1.02141	1.02141	0	0	0	0	0	0	1.02141	0	0	0	0	0	0	Cou gla
1	Col mop	T	0.45	0.8	0.7	0.375	1	1			1												0.198804	0.220893	0.441786	0.883573	1.32536	1.76715	2.20893	0.198804	0.198804	0.198804	0.198804	0.198804	0.198804	0	5.5	0	0	0	0	0.210375	0	1.15706	0	0	0	0	Col mop
1	Col mop	T	1.7	1.6	1.8	0.85	1	1	2			1											3.85866	1.1349	2.2698	4.5396	6.8094	9.0792	11.349	1.1349	2.2698	3.85866	3.85866	3.85866	3.85866	18	0	5.5	0	0	0	4.70568	84.7023	0	22.4578	0	0	0	Col mop
1	Col mop	T	1.7	2	1.9	0.975	1	1	2			1											5.07701	1.49324	2.98648	5.97295	8.95943	11.9459	14.9324	1.49324	2.98648	5.07701	5.07701	5.07701	5.07701	18	0	5.5	0	0	0	6.19148	111.447	0	29.5487	0	0	0	Col mop
1	Col mop	T	0.75	0.6	0.4	0.25	1	1			1												0.147262	0.0981748	0.19635	0.392699	0.589049	0.785398	0.981748	0.0981748	0.147262	0.147262	0.147262	0.147262	0.147262	0	5.5	0	0	0	0	0.155833	0	0.857081	0	0	0	0	Col mop
1	Col mop	T	1.55	1.6	1.7	0.825	1	1	2			1											3.31428	1.06912	2.13825	4.27649	6.41474	8.55299	10.6912	1.06912	2.13825	3.31428	3.31428	3.31428	3.31428	18	0	5.5	0	0	0	4.04181	72.7525	0	19.2895	0	0	0	Col mop
1	Col mop	T	1.45	1.6	1.6	0.8	1	1	2			1											2.9154	1.00531	2.01062	4.02124	6.03186	8.04248	10.0531	1.00531	2.01062	2.9154	2.9154	2.9154	2.9154	18	0	5.5	0	0	0	3.55536	63.9965	0	16.9679	0	0	0	Col mop
1	Col mop	T	1.1	1.75	1.15	0.725	1	1	2														1.81643	0.82565	1.6513	3.3026	4.9539	6.6052	8.2565	0.82565	1.6513	1.81643	1.81643	1.81643	1.81643	18	0	0	0	0	0	2.21516	39.8728	0	0	0	0	0	Col mop
1	Col mop	T	1.7	1.6	1.4	0.75	1	1	3			1											3.00415	0.883573	1.76715	3.53429	5.30144	7.06858	8.83573	0.883573	1.76715	3.00415	3.00415	3.00415	3.00415	38	0	5.5	0	0	0	4.8454	184.125	0	17.4845	0	0	0	Col mop
1	Cou gla	T	0.8	1.2	1.65	0.7125	1	1						1									1.27588	0.797425	1.59485	3.1897	4.78455	6.3794	7.97425	0.797425	1.27588	1.27588	1.27588	1.27588	1.27588	0	0	0	5.5	0	0	1.27588	0	0	0	7.42575	0	0	Cou gla
1	Col mop	T	0.2	0.2	0.15	0.0875	1	1															0.00481056	0.0120264	0.0240528	0.0481056	0.0721585	0.0962113	0.120264	0.00481056	0.00481056	0.00481056	0.00481056	0.00481056	0.00481056	0	0	0	0	0	0	0.00481056	0	0	0	0	0	0	Col mop
1	Com mos	T	3.3	3.25	3	1.5625	3	3			1												8.42846	3.27996	5.57488	7.91319	8.42213	8.5089	9.58072	3.27996	5.57488	7.91319	8.42213	8.42846	8.42846	0	5.5	0	0	0	0	8.919	0	49.0545	0	0	0	0	Com mos
1	Com mos	T	3.2	2.8	4.35	1.7875	3	3			1												10.6964	4.2713	7.22057	10.1323	10.6938	10.8635	12.6001	4.2713	7.22057	10.1323	10.6938	10.6964	10.6964	0	5.5	0	0	0	0	11.3189	0	62.254	0	0	0	0	Com mos
[truncated: 34 more columns]

## Sheet: Site3
Date:	20/8/2014														Total	T	C	%C
Site No. :	GNP4													Col mop	20	7	13	65
			Trans 1						Trans 1a for Cou gla					ALL SPECIES	58	44	14	24.1379
			Width (m)	Length (m)	Area (ha)				Width (m)	Length (m)	Area (ha)			Shrub density (no/ha)	232
	Transect Dimensions:		50	50	0.25				5	50	0.025
	Co-ordinates:			X	Y					X	Y
			NW Corner						NW Corner
			SW Corner						SW Corner
			NE Corner						NE Corner
			SE Corner						SE Corner
									OED		OUD	NED		NUD	NFD	OFD	OBE	OBU	NBE	NBU	RE	Notes	Canopy volume (m3)																				Damage
Trans. No.	Sp. Code	Coppice	Height (m)	D1 (m)	D2 (m)	R	Shape	Adj. shape	Score	Eaten		Score	Eaten										Total	0.5	1	2	3	4	5	0.5	1	2	3	4	5	OED	OUD	NED	NUD	NFD	OFD	Old Rec. Vol.	OED	OUD	NED	NUD	NFD	OFD	Sp. Code
1	Cou gla	T	0.45	0.6	0.25	0.2125	2	2						2									0.0212581	0.0291606	0.233285	1.86628	6.2987	14.9302	29.1606	0.0212581	0.0212581	0.0212581	0.0212581	0.0212581	0.0212581	0	0	0	18	0	0	0.0212581	0	0	0	0.466641	0	0	Cou gla
1	Cou gla	T	0.85	1.55	1.4	0.7375	6	7			1												1.03152	0.792833	0.975909	-3.62061	-20.0648	-54.6335	-113.604	0.792833	1.03152	1.03152	1.03152	1.03152	1.03152	0	5.5	0	0	0	0	1.09155	0	6.00355	0	0	0	0	Cou gla
1	Bos mos	T	0.35	0.4	0.3	0.175	1	1			1												0.0336739	0.0481056	0.0962113	0.192423	0.288634	0.384845	0.481056	0.0336739	0.0336739	0.0336739	0.0336739	0.0336739	0.0336739	0	5.5	0	0	0	0	0.0356338	0	0.195986	0	0	0	0	Bos mos
1	Cou gla	T	0.75	0.85	1.34	0.5475	1	1			2												0.706284	0.470856	0.941712	1.88342	2.82514	3.76685	4.70856	0.470856	0.706284	0.706284	0.706284	0.706284	0.706284	0	18	0	0	0	0	0.861322	0	15.5038	0	0	0	0	Cou gla
1	Cou gla	T	0.6	1.2	0.75	0.4875	1	1															0.447971	0.37331	0.746619	1.49324	2.23986	2.98648	3.7331	0.37331	0.447971	0.447971	0.447971	0.447971	0.447971	0	0	0	0	0	0	0.447971	0	0	0	0	0	0	Cou gla
1	Cou gla	T	0.7	1.58	0.68	0.565	2	2						1									0.23377	0.0851932	0.681546	5.45236	18.4017	43.6189	85.1932	0.0851932	0.23377	0.23377	0.23377	0.23377	0.23377	0	0	0	5.5	0	0	0.23377	0	0	0	1.36057	0	0	Cou gla
1	Mae par	T	0.5	0.3	0.33	0.1575	2	2						1									0.0129755	0.0129755	0.103804	0.830434	2.80272	6.64347	12.9755	0.0129755	0.0129755	0.0129755	0.0129755	0.0129755	0.0129755	0	0	0	5.5	0	0	0.0129755	0	0	0	0.075519	0	0	Mae par
1	Bos mos	T	0.85	0.8	0.9	0.425	3	3															0.160617	0.149403	0.161499	0.558383	2.75988	8.3352	18.8536	0.149403	0.160617	0.160617	0.160617	0.160617	0.160617	0	0	0	0	0	0	0.160617	0	0	0	0	0	0	Bos mos
1	Cou gla	T	0.25	1	0.88	0.47	6	1				3											0.173494	0.346989	0.693978	1.38796	2.08193	2.77591	3.46989	0.173494	0.173494	0.173494	0.173494	0.173494	0.173494	0	0	38	0	0	0	0.173494	0	0	10.6335	0	0	0	Cou gla
1	Cou gla	T	0.25	0.25	0.15	0.1	1	1						1									0.00785398	0.015708	0.0314159	0.0628319	0.0942478	0.125664	0.15708	0.00785398	0.00785398	0.00785398	0.00785398	0.00785398	0.00785398	0	0	0	5.5	0	0	0.00785398	0	0	0	0.045711	0	0	Cou gla
1	Cou gla	T	0.45	0.5	0.34	0.21	1	1						1									0.0623449	0.0692721	0.138544	0.277088	0.415633	0.554177	0.692721	0.0623449	0.0623449	0.0623449	0.0623449	0.0623449	0.0623449	0	0	0	5.5	0	0	0.0623449	0	0	0	0.362854	0	0	Cou gla
1	Cou gla	T	0.45	0.9	0.75	0.4125	1	1			1												0.240553	0.267281	0.534562	1.06912	1.60368	2.13825	2.67281	0.240553	0.240553	0.240553	0.240553	0.240553	0.240553	0	5.5	0	0	0	0	0.254553	0	1.40004	0	0	0	0	Cou gla
1	Cou gla	T	0.45	0.45	0.6	0.2625	1	1			2												0.0974139	0.108238	0.216475	0.432951	0.649426	0.865901	1.08238	0.0974139	0.0974139	0.0974139	0.0974139	0.0974139	0.0974139	0	18	0	0	0	0	0.118797	0	2.13835	0	0	0	0	Cou gla
1	Cou gla	T	0.2	0.18	0.18	0.09	1	1															0.00508938	0.0127235	0.0254469	0.0508938	0.0763407	0.101788	0.127235	0.00508938	0.00508938	0.00508938	0.00508938	0.00508938	0.00508938	0	0	0	0	0	0	0.00508938	0	0	0	0	0	0	Cou gla
1	Cou gla	T	0.8	0.92	0.87	0.4475	1	1						1									0.503299	0.314562	0.629124	1.25825	1.88737	2.51649	3.14562	0.314562	0.503299	0.503299	0.503299	0.503299	0.503299	0	0	0	5.5	0	0	0.503299	0	0	0	2.92925	0	0	Cou gla
1	Cou gla	T	0.6	0.82	0.65	0.3675	1	1						1									0.254575	0.212146	0.424292	0.848583	1.27288	1.69717	2.12146	0.212146	0.254575	0.254575	0.254575	0.254575	0.254575	0	0	0	5.5	0	0	0.254575	0	0	0	1.48165	0	0	Cou gla
1	Cou gla	T	0.2	0.77	0.35	0.28	3	3						1									0.0164036	0.0717659	1.06624	11.9747	45.028	112.529	226.78	0.0164036	0.0164036	0.0164036	0.0164036	0.0164036	0.0164036	0	0	0	5.5	0	0	0.0164036	0	0	0	0.0954709	0	0	Cou gla
1	Cou gla	T	0.5	0.8	0.7	0.375	1	1															0.220893	0.220893	0.441786	0.883573	1.32536	1.76715	2.20893	0.220893	0.220893	0.220893	0.220893	0.220893	0.220893	0	0	0	0	0	0	0.220893	0	0	0	0	0	0	Cou gla
1	Cou gla	T	0.6	0.72	0.67	0.3475	3	3			1			1									0.0757975	0.0754466	0.098256	1.03871	4.92684	13.8681	29.9681	0.0754466	0.0757975	0.0757975	0.0757975	0.0757975	0.0757975	0	5.5	0	5.5	0	0	0.080209	0	0.44115	0	0.44115	0	0	Cou gla
1	Cou gla	T	0.25	0.33	0.23	0.14	3	3															0.00512614	0.0102523	0.143532	1.76339	6.82801	17.3058	35.1653	0.00512614	0.00512614	0.00512614	0.00512614	0.00512614	0.00512614	0	0	0	0	0	0	0.00512614	0	0	0	0	0	0	Cou gla
1	Cou gla	T	0.75	0.85	0.61	0.365	1	1						1									0.313904	0.209269	0.418539	0.837077	1.25562	1.67415	2.09269	0.209269	0.313904	0.313904	0.313904	0.313904	0.313904	0	0	0	5.5	0	0	0.313904	0	0	0	1.82695	0	0	Cou gla
1	Col mop	T	2.4	2.47	2.63	1.275	1	1			2												12.2569	2.55353	5.10705	10.2141	15.3212	20.4282	25.5353	2.55353	5.10705	10.2141	12.2569	12.2569	12.2569	0	18	0	0	0	0	14.9475	0	269.054	0	0	0	0	Col mop
1	Cou gla	T	0.05	0.25	0.15	0.1	6	1						1									0.0015708	0.015708	0.0314159	0.0628319	0.0942478	0.125664	0.15708	0.0015708	0.0015708	0.0015708	0.0015708	0.0015708	0.0015708	0	0	0	5.5	0	0	0.0015708	0	0	0	0.0091422	0	0	Cou gla
1	Cou gla	T	0.4	0.27	0.22	0.1225	1	1															0.0188574	0.0235718	0.0471435	0.094287	0.141431	0.188574	0.235718	0.0188574	0.0188574	0.0188574	0.0188574	0.0188574	0.0188574	0	0	0	0	0	0	0.0188574	0	0	0	0	0	0	Cou gla
1	Cou gla	T	0.45	0.5	0.6	0.275	3	3						1									0.0356018	0.0356506	0.100603	1.49049	6.51381	17.5147	36.8374	0.0356018	0.0356018	0.0356018	0.0356018	0.0356018	0.0356018	0	0	0	5.5	0	0	0.0356018	0	0	0	0.207206	0	0	Cou gla
1	Cou gla	T	0.3	0.4	0.25	0.1625	3	3			1												0.00828747	0.010743	0.113569	1.5163	6.04985	15.5559	31.8761	0.00828747	0.00828747	0.00828747	0.00828747	0.00828747	0.00828747	0	5.5	0	0	0	0	0.00876981	0	0.048234	0	0	0	0	Cou gla
1	Cou gla	T	0.2	0.7	0.42	0.28	3	3						4									0.0164036	0.0717659	1.06624	11.9747	45.028	112.529	226.78	0.0164036	0.0164036	0.0164036	0.0164036	0.0164036	0.0164036	0	0	0	63	0	0	0.0164036	0	0	0	2.79305	0	0	Cou gla
1	Cou gla	T	0.7	0.6	0.6	0.3	1	1			2												0.19792	0.141372	0.282743	0.565487	0.84823	1.13097	1.41372	0.141372	0.19792	0.19792	0.19792	0.19792	0.19792	0	18	0	0	0	0	0.241366	0	4.34459	0	0	0	0	Cou gla
1	Cou gla	T	0.3	1.45	0.95	0.6	1	1				2											0.339292	0.565487	1.13097	2.26195	3.39292	4.52389	5.65487	0.339292	0.339292	0.339292	0.339292	0.339292	0.339292	0	0	18	0	0	0	0.339292	0	0	7.44787	0	0	0	Cou gla
1	Cou gla	T	0.5	0.6	0.33	0.2325	1	1			1												0.0849114	0.0849114	0.169823	0.339645	0.509468	0.679291	0.849114	0.0849114	0.0849114	0.0849114	0.0849114	0.0849114	0.0849114	0	5.5	0	0	0	0	0.0898533	0	0.494193	0	0	0	0	Cou gla
1	Cou gla	T	0.6	0.65	0.48	0.2825	1	1						1									0.150431	0.125359	0.250719	0.501437	0.752156	1.00287	1.25359	0.125359	0.150431	0.150431	0.150431	0.150431	0.150431	0	0	0	5.5	0	0	0.150431	0	0	0	0.875526	0	0	Cou gla
1	Cou gla	T	0.9	1.2	1.2	0.6	3	3			2												0.338953	0.309196	0.339418	0.957809	4.64491	14.1904	32.3842	0.309196	0.338953	0.338953	0.338953	0.338953	0.338953	0	18	0	0	0	0	0.413357	0	7.44043	0	0	0	0	Cou gla
1	Cou gla	T	0.7	0.4	0.47	0.2175	1	1			3												0.104032	0.0743085	0.148617	0.297234	0.445851	0.594468	0.743085	0.0743085	0.104032	0.104032	0.104032	0.104032	0.104032	0	38	0	0	0	0	0.167793	0	6.37615	0	0	0	0	Cou gla
1	Mae par	T	0.3	0.45	0.39	0.21	3	3			3												0.0138406	0.0179415	0.189667	2.53231	10.1036	25.9793	53.2349	0.0138406	0.0138406	0.0138406	0.0138406	0.0138406	0.0138406	0	38	0	0	0	0	0.0223235	0	0.848293	0	0	0	0	Mae par
1	Mae par	T	0.3	0.5	0.45	0.2375	1	1			4												0.0531616	0.0886027	0.177205	0.354411	0.531616	0.708822	0.886027	0.0531616	0.0531616	0.0531616	0.0531616	0.0531616	0.0531616	0	63	0	0	0	0	0.14368	0	9.05185	0	0	0	0	Mae par
1	Mae par	T	0.2	0.3	0.05	0.0875	1	1			1												0.00481056	0.0120264	0.0240528	0.0481056	0.0721585	0.0962113	0.120264	0.00481056	0.00481056	0.00481056	0.00481056	0.00481056	0.00481056	0	5.5	0	0	0	0	0.00509054	0	0.027998	0	0	0	0	Mae par
1	Col mop	C	2.1	1.65	1.9	0.8875	1	1	3			1											5.19644	1.23725	2.4745	4.94899	7.42349	9.89798	12.3725	1.23725	2.4745	4.94899	5.19644	5.19644	5.19644	38	0	5.5	0	0	0	8.38135	318.491	0	30.2438	0	0	0	Col mop
1	Col mop	C	2.7	2	2.5	1.125	1	1	3			1											10.7354	1.98804	3.97608	7.95216	11.9282	15.9043	19.8804	1.98804	3.97608	7.95216	10.7354	10.7354	10.7354	38	0	5.5	0	0	0	17.3152	657.977	0	62.4812	0	0	0	Col mop
1	Col mop	T	2.2	2.3	2.05	1.0875	1	1	2			1											8.17393	1.85771	3.71542	7.43085	11.1463	14.8617	18.5771	1.85771	3.71542	7.43085	8.17393	8.17393	8.17393	18	0	5.5	0	0	0	9.96821	179.428	0	47.5732	0	0	0	Col mop
1	Col mop	T	2.4	1.3	1.3	0.65	1	1	3			1											3.18557	0.663661	1.32732	2.65465	3.98197	5.30929	6.63661	0.663661	1.32732	2.65465	3.18557	3.18557	3.18557	38	0	5.5	0	0	0	5.13802	195.245	0	18.5404	0	0	0	Col mop
1	Alb ant	T	2.6	0.7	1.3	0.5	3	3	4			3											0.679998	0.321699	0.521528	0.671641	0.682474	0.78616	1.21483	0.321699	0.521528	0.671641	0.679998	0.679998	0.679998	63	0	38	0	0	0	1.83783	115.783	0	41.6773	0	0	0	Alb ant
1	Col mop	T	2.6	1.3	1.15	0.6125	3	3	3														1.02042	0.48275	0.782617	1.00788	1.02414	1.17973	1.82301	0.48275	0.782617	1.00788	1.02042	1.02042	1.02042	38	0	0	0	0	0	1.64584	62.542	0	0	0	0	0	Col mop
1	Col mop	T	2.4	2.4	2.1	1.125	1	1	3			2											9.54259	1.98804	3.97608	7.95216	11.9282	15.9043	19.8804	1.98804	3.97608	7.95216	9.54259	9.54259	9.54259	38	0	18	0	0	0	15.3913	584.868	0	209.471	0	0	0	Col mop
1	Col mop	T	3	2.1	2.1	1.05	1	1	2														10.3908	1.7318	3.46361	6.92721	10.3908	13.8544	17.318	1.7318	3.46361	6.92721	10.3908	10.3908	10.3908	18	0	0	0	0	0	12.6717	228.091	0	0	0	0	0	Col mop
1	Col mop	T	2	2	1.7	0.925	1	1	3			1											5.37605	1.34401	2.68803	5.37605	8.06408	10.7521	13.4401	1.34401	2.68803	5.37605	5.37605	5.37605	5.37605	38	0	5.5	0	0	0	8.67105	329.5	0	31.2892	0	0	0	Col mop
1	Col mop	C	2.7	2.75	2.25	1.25	1	1	4			2											13.2536	2.45437	4.90874	9.81748	14.7262	19.635	24.5437	2.45437	4.90874	9.81748	13.2536	13.2536	13.2536	63	0	18	0	0	0	35.8205	2256.69	0	290.933	0	0	0	Col mop
1	Col mop	C	2.2	2.75	2.2	1.2375	1	1	4			2											10.5843	2.40553	4.81105	9.62211	14.4332	19.2442	24.0553	2.40553	4.81105	9.62211	10.5843	10.5843	10.5843	63	0	18	0	0	0	28.6063	1802.2	0	232.339	0	0	0	Col mop
1	Bos mos	C	2.6	4.48	3.3	1.945	1	1	4			1											30.9003	5.94236	11.8847	23.7694	35.6542	47.5389	59.4236	5.94236	11.8847	23.7694	30.9003	30.9003	30.9003	63	0	5.5	0	0	0	83.5143	5261.4	0	179.843	0	0	0	Bos mos
1	Col mop	C	2.2	2.6	3.3	1.475	1	1	2			1											15.0368	3.41746	6.83493	13.6699	20.5048	27.3397	34.1746	3.41746	6.83493	13.6699	15.0368	15.0368	15.0368	18	0	5.5	0	0	0	18.3376	330.077	0	87.516	0	0	0	Col mop
1	Col mop	C	2	1.95	1.9	0.9625	2	2	4			1											1.93832	0.0302863	0.24229	1.93832	6.54183	15.5066	30.2863	0.0302863	0.24229	1.93832	1.93832	1.93832	1.93832	63	0	5.5	0	0	0	5.2387	330.038	0	11.2812	0	0	0	Col mop
1	Col mop	C	2.7	3.33	3.3	1.6575	1	1	3			2											23.3035	4.31546	8.63092	17.2618	25.8928	34.5237	43.1546	4.31546	8.63092	17.2618	23.3035	23.3035	23.3035	38	0	18	0	0	0	37.5863	1428.28	0	511.54	0	0	0	Col mop
1	Col mop	C	2.4	2.75	2.68	1.3575	1	1	3			1											13.8944	2.89467	5.78935	11.5787	17.368	23.1574	28.9467	2.89467	5.78935	11.5787	13.8944	13.8944	13.8944	38	0	5.5	0	0	0	22.4104	851.594	0	80.8671	0	0	0	Col mop
1	Col mop	C	2.9	2.95	2.92	1.4675	1	1	2			1											19.6202	3.3828	6.7656	13.5312	20.2968	27.0624	33.828	3.3828	6.7656	13.5312	19.6202	19.6202	19.6202	18	0	5.5	0	0	0	23.9271	430.688	0	114.192	0	0	0	Col mop
1	Col mop	C	2.4	4.2	4.1	2.075	3	3	4			2											10.8104	5.44664	8.66458	10.7603	10.9793	14.0135	24.5549	5.44664	8.66458	10.7603	10.8104	10.8104	10.8104	63	0	18	0	0	0	29.2173	1840.69	0	237.301	0	0	0	Col mop
1	Col mop	C	2.9	3	2.8	1.45	1	1	4			1											19.1551	3.3026	6.6052	13.2104	19.8156	26.4208	33.026	3.3026	6.6052	13.2104	19.1551	19.1551	19.1551	63	0	5.5	0	0	0	51.7705	3261.54	0	111.485	0	0	0	Col mop
1	Bos mos	T	2.9	4.65	4.02	2.1675	3	3	1			1											14.2531	6.17427	10.2447	13.8271	14.2537	15.031	19.6653	6.17427	10.2447	13.8271	14.2531	14.2531	14.2531	5.5	0	5.5	0	0	0	15.0827	82.9547	0	82.9547	0	0	0	Bos mos
1	Col mop	C	3	2.31	1.68	0.9975	1	1	4			2											9.37771	1.56295	3.1259	6.25181	9.37771	12.5036	15.6295	1.56295	3.1259	6.25181	9.37771	9.37771	9.37771	63	0	18	0	0	0	25.3452	1596.75	0	205.852	0	0	0	Col mop
1	Col mop	C	2.3	1.9	2.15	1.0125	1	1	3			1											7.40743	1.61031	3.22062	6.44125	9.66187	12.8825	16.1031	1.61031	3.22062	6.44125	7.40743	7.40743	7.40743	38	0	5.5	0	0	0	11.9475	454.004	0	43.112	0	0	0	Col mop
[truncated: 34 more columns]

## Sheet: Site4
Date:	24/8/2014													Total	T	C	%C
Site No. :	GNP5												Col mop	42	41	1	2.38095
			Trans 1 Col mop						Trans 2 for all species EXCL Col mop				ALL SPECIES 1	44	43	1	2.27273
			Width (m)	Length (m)	Area (ha)				Width (m)	Length (m)	Area (ha)		Shrub density (no/ha) 1	880
	Transect Dimensions:		10	50	0.05				25	50	0.125		ALL SPECIES 2	12	12	0	0
													Shrub density (no/ha) 2	96
	Co-ordinates:			X	Y					X	Y		TOTAL Shrub density (no/ha)	976
			NW Corner						NW Corner
			SW Corner						SW Corner
			NE Corner						NE Corner
			SE Corner						SE Corner
									OED		OUD	NED		NUD	NFD	OFD	OBE	OBU	NBE	NBU	RE	Notes	Canopy volume (m3)																				Damage
Trans. No.	Sp. Code	Coppice	Height (m)	D1 (m)	D2 (m)	R	Shape	Adj. shape	Score	Eaten		Score	Eaten										Total	0.5	1	2	3	4	5	0.5	1	2	3	4	5	OED	OUD	NED	NUD	NFD	OFD	Old Rec. Vol.	OED	OUD	NED	NUD	NFD	OFD	Sp. Code
1	Dri mos	T	1.85	1.2	1	0.55	1	1			1												1.75811	0.475166	0.950332	1.90066	2.851	3.80133	4.75166	0.475166	0.950332	1.75811	1.75811	1.75811	1.75811	0	5.5	0	0	0	0	1.86044	0	10.2324	0	0	0	0	Dri mos
1	Col mop	T	2.4	3.5	2.1	1.4	2	2	3														4.92109	0.0444977	0.355982	2.84785	9.61151	22.7828	44.4977	0.0444977	0.355982	2.84785	4.92109	4.92109	4.92109	38	0	0	0	0	0	7.93724	301.615	0	0	0	0	0	Col mop
1	Col mop	T	0.4	0.25	0.25	0.125	1	1	2														0.019635	0.0245437	0.0490874	0.0981748	0.147262	0.19635	0.245437	0.019635	0.019635	0.019635	0.019635	0.019635	0.019635	18	0	0	0	0	0	0.0239451	0.431011	0	0	0	0	0	Col mop
1	Col mop	T	1.6	1.7	1.6	0.825	1	1	2														3.42119	1.06912	2.13825	4.27649	6.41474	8.55299	10.6912	1.06912	2.13825	3.42119	3.42119	3.42119	3.42119	18	0	0	0	0	0	4.17219	75.0994	0	0	0	0	0	Col mop
1	Col mop	T	2.3	1.3	1.3	0.65	1	1	2														3.05284	0.663661	1.32732	2.65465	3.98197	5.30929	6.63661	0.663661	1.32732	2.65465	3.05284	3.05284	3.05284	18	0	0	0	0	0	3.72298	67.0136	0	0	0	0	0	Col mop
1	Col mop	T	0.6	0.5	0.2	0.175	1	1			1												0.0577268	0.0481056	0.0962113	0.192423	0.288634	0.384845	0.481056	0.0481056	0.0577268	0.0577268	0.0577268	0.0577268	0.0577268	0	5.5	0	0	0	0	0.0610865	0	0.335976	0	0	0	0	Col mop
1	Col mop	T	0.7	0.6	0.45	0.2625	3	3			1												0.0504604	0.0492835	0.0544325	0.373672	1.84041	5.33733	11.7471	0.0492835	0.0504604	0.0504604	0.0504604	0.0504604	0.0504604	0	5.5	0	0	0	0	0.0533973	0	0.293685	0	0	0	0	Col mop
1	Col mop	T	2.7	2.6	2.2	1.2	1	1	3			1											12.2145	2.26195	4.52389	9.04779	13.5717	18.0956	22.6195	2.26195	4.52389	9.04779	12.2145	12.2145	12.2145	38	0	5.5	0	0	0	19.7008	748.631	0	71.0898	0	0	0	Col mop
1	Col mop	T	0.85	0.6	0.75	0.3375	1	1	2														0.30417	0.178924	0.357847	0.715694	1.07354	1.43139	1.78924	0.178924	0.30417	0.30417	0.30417	0.30417	0.30417	18	0	0	0	0	0	0.370939	6.6769	0	0	0	0	0	Col mop
1	Col mop	T	1.15	1	0.85	0.4625	1	1	2														0.772807	0.336003	0.672006	1.34401	2.01602	2.68803	3.36003	0.336003	0.672006	0.772807	0.772807	0.772807	0.772807	18	0	0	0	0	0	0.942448	16.9641	0	0	0	0	0	Col mop
1	Col mop	T	1.1	1.2	1.05	0.5625	1	1	2			1											1.09342	0.49701	0.99402	1.98804	2.98206	3.97608	4.9701	0.49701	0.99402	1.09342	1.09342	1.09342	1.09342	18	0	5.5	0	0	0	1.33344	24.0019	0	6.36383	0	0	0	Col mop
1	Col mop	T	0.5	0.6	0.9	0.375	3	3	2														0.0735574	0.0735574	0.147115	2.05961	9.26824	25.3038	53.6969	0.0735574	0.0735574	0.0735574	0.0735574	0.0735574	0.0735574	18	0	0	0	0	0	0.0897042	1.61468	0	0	0	0	0	Col mop
1	Col mop	T	0.65	0.9	0.7	0.4	1	1	4														0.326726	0.251327	0.502655	1.00531	1.50796	2.01062	2.51327	0.251327	0.326726	0.326726	0.326726	0.326726	0.326726	63	0	0	0	0	0	0.883042	55.6317	0	0	0	0	0	Col mop
1	Col mop	T	0.7	0.45	0.4	0.2125	2	2	2			2											0.0330682	0.0120511	0.0964086	0.771269	2.60303	6.17015	12.0511	0.0120511	0.0330682	0.0330682	0.0330682	0.0330682	0.0330682	18	0	18	0	0	0	0.040327	0.725886	0	0.725886	0	0	0	Col mop
1	Col mop	T	0.35	0.65	0.35	0.25	3	3				2											0.0228845	0.0246859	0.169466	2.42056	9.95578	25.9776	53.6886	0.0228845	0.0228845	0.0228845	0.0228845	0.0228845	0.0228845	0	0	18	0	0	0	0.0228845	0	0	0.502344	0	0	0	Col mop
1	Col mop	T	0.5	0.85	0.5	0.3375	3	3				2											0.0595815	0.0595815	0.119163	1.66828	7.50727	20.496	43.4945	0.0595815	0.0595815	0.0595815	0.0595815	0.0595815	0.0595815	0	0	18	0	0	0	0.0595815	0	0	1.30789	0	0	0	Col mop
1	Col mop	T	0.6	0.75	0.65	0.35	1	1	2			2											0.230907	0.192423	0.384845	0.76969	1.15454	1.53938	1.92423	0.192423	0.230907	0.230907	0.230907	0.230907	0.230907	18	0	18	0	0	0	0.281594	5.06869	0	5.06869	0	0	0	Col mop
1	Col mop	T	0.4	0.8	0.65	0.3625	3	3	2														0.0549883	0.0558475	0.240574	3.57424	15.1561	40.1414	83.6853	0.0549883	0.0549883	0.0549883	0.0549883	0.0549883	0.0549883	18	0	0	0	0	0	0.0670589	1.20706	0	0	0	0	0	Col mop
1	Col mop	T	0.6	0.6	0.8	0.35	1	1			2												0.230907	0.192423	0.384845	0.76969	1.15454	1.53938	1.92423	0.192423	0.230907	0.230907	0.230907	0.230907	0.230907	0	18	0	0	0	0	0.281594	0	5.06869	0	0	0	0	Col mop
1	Col mop	T	2.7	2.8	2.15	1.2375	1	1	3			2											12.9898	2.40553	4.81105	9.62211	14.4332	19.2442	24.0553	2.40553	4.81105	9.62211	12.9898	12.9898	12.9898	38	0	18	0	0	0	20.9514	796.152	0	285.143	0	0	0	Col mop
1	Col mop	C	3	2.6	2.9	1.375	1	1	2			1											17.8187	2.96979	5.93957	11.8791	17.8187	23.7583	29.6979	2.96979	5.93957	11.8791	17.8187	17.8187	17.8187	18	0	5.5	0	0	0	21.7301	391.143	0	103.707	0	0	0	Col mop
1	Col mop	T	0.5	1.2	0.75	0.4875	3	3	2														0.124312	0.124312	0.248624	3.48074	15.6633	42.7634	90.7478	0.124312	0.124312	0.124312	0.124312	0.124312	0.124312	18	0	0	0	0	0	0.1516	2.7288	0	0	0	0	0	Col mop
1	Col mop	T	0.5	0.3	0.25	0.1375	1	1															0.0296979	0.0296979	0.0593957	0.118791	0.178187	0.237583	0.296979	0.0296979	0.0296979	0.0296979	0.0296979	0.0296979	0.0296979	0	0	0	0	0	0	0.0296979	0	0	0	0	0	0	Col mop
1	Col mop	T	0.5	0.6	0.43	0.2575	1	1				3											0.104154	0.104154	0.208307	0.416614	0.624922	0.833229	1.04154	0.104154	0.104154	0.104154	0.104154	0.104154	0.104154	0	0	38	0	0	0	0.104154	0	0	6.38361	0	0	0	Col mop
1	Col mop	T	0.9	1.55	0.75	0.575	1	1	2														0.93482	0.519345	1.03869	2.07738	3.11607	4.15476	5.19345	0.519345	0.93482	0.93482	0.93482	0.93482	0.93482	18	0	0	0	0	0	1.14002	20.5204	0	0	0	0	0	Col mop
1	Col mop	T	0.8	1	0.8	0.45	2	2	2														0.169476	0.0413761	0.331009	2.64807	8.93723	21.1845	41.3761	0.0413761	0.169476	0.169476	0.169476	0.169476	0.169476	18	0	0	0	0	0	0.206678	3.72021	0	0	0	0	0	Col mop
1	Col mop	T	0.4	0.6	0.6	0.3	2	2															0.0376614	0.0735574	0.58846	4.70768	15.8884	37.6614	73.5574	0.0376614	0.0376614	0.0376614	0.0376614	0.0376614	0.0376614	0	0	0	0	0	0	0.0376614	0	0	0	0	0	0	Col mop
1	Col mop	T	0.7	0.5	0.6	0.275	1	1	2														0.166308	0.118791	0.237583	0.475166	0.712749	0.950332	1.18791	0.118791	0.166308	0.166308	0.166308	0.166308	0.166308	18	0	0	0	0	0	0.202815	3.65066	0	0	0	0	0	Col mop
1	Col mop	T	0.9	0.7	0.6	0.325	1	1			1												0.298648	0.165915	0.331831	0.663661	0.995492	1.32732	1.65915	0.165915	0.298648	0.298648	0.298648	0.298648	0.298648	0	5.5	0	0	0	0	0.316029	0	1.73816	0	0	0	0	Col mop
1	Col mop	T	0.4	0.5	0.3	0.2	1	1			1												0.0502655	0.0628319	0.125664	0.251327	0.376991	0.502655	0.628319	0.0502655	0.0502655	0.0502655	0.0502655	0.0502655	0.0502655	0	5.5	0	0	0	0	0.053191	0	0.29255	0	0	0	0	Col mop
1	Col mop	T	0.25	0.2	0.2	0.1	1	1															0.00785398	0.015708	0.0314159	0.0628319	0.0942478	0.125664	0.15708	0.00785398	0.00785398	0.00785398	0.00785398	0.00785398	0.00785398	0	0	0	0	0	0	0.00785398	0	0	0	0	0	0	Col mop
1	Col mop	T	2.1	1.9	1.4	0.825	1	1	2														4.49032	1.06912	2.13825	4.27649	6.41474	8.55299	10.6912	1.06912	2.13825	4.27649	4.49032	4.49032	4.49032	18	0	0	0	0	0	5.476	98.5679	0	0	0	0	0	Col mop
1	Com mos	T	3	4.9	1.4	1.575	3	3			1												7.78532	3.27993	5.47856	7.49697	7.78532	8.07367	10.0921	3.27993	5.47856	7.49697	7.78532	7.78532	7.78532	0	5.5	0	0	0	0	8.23843	0	45.3114	0	0	0	0	Com mos
1	Col mop	T	0.3	0.1	0.3	0.1	1	1															0.00942478	0.015708	0.0314159	0.0628319	0.0942478	0.125664	0.15708	0.00942478	0.00942478	0.00942478	0.00942478	0.00942478	0.00942478	0	0	0	0	0	0	0.00942478	0	0	0	0	0	0	Col mop
1	Col mop	T	0.9	1.3	0.9	0.55	3	3	1			3											0.284814	0.25981	0.285205	0.804825	3.90301	11.9239	27.2117	0.25981	0.284814	0.284814	0.284814	0.284814	0.284814	5.5	0	38	0	0	0	0.301391	1.65765	0	17.4564	0	0	0	Col mop
1	Col mop	T	1.5	1.2	0.7	0.475	1	1	3														1.06323	0.354411	0.708822	1.41764	2.12647	2.83529	3.54411	0.354411	0.708822	1.06323	1.06323	1.06323	1.06323	38	0	0	0	0	0	1.71489	65.1659	0	0	0	0	0	Col mop
1	Col mop	T	0.9	0.65	0.6	0.3125	1	1	2														0.276117	0.153398	0.306796	0.613592	0.920388	1.22718	1.53398	0.153398	0.276117	0.276117	0.276117	0.276117	0.276117	18	0	0	0	0	0	0.336727	6.06109	0	0	0	0	0	Col mop
1	Col mop	T	2.4	2.35	1.95	1.075	1	1	3														8.71321	1.81525	3.6305	7.26101	10.8915	14.522	18.1525	1.81525	3.6305	7.26101	8.71321	8.71321	8.71321	38	0	0	0	0	0	14.0536	534.035	0	0	0	0	0	Col mop
1	Col mop	T	2.5	1.9	1.3	0.8	1	1	2			2											5.02655	1.00531	2.01062	4.02124	6.03186	8.04248	10.0531	1.00531	2.01062	4.02124	5.02655	5.02655	5.02655	18	0	18	0	0	0	6.12994	110.339	0	110.339	0	0	0	Col mop
1	Col mop	T	0.45	0.2	0.2	0.1	3	3			1												0.00470768	0.00471413	0.0133029	0.19709	0.86133	2.316	4.87106	0.00470768	0.00470768	0.00470768	0.00470768	0.00470768	0.00470768	0	5.5	0	0	0	0	0.00498167	0	0.0273992	0	0	0	0	Col mop
1	Col mop	T	0.75	0.9	0.92	0.455	1	1	3			2											0.487791	0.325194	0.650388	1.30078	1.95116	2.60155	3.25194	0.325194	0.487791	0.487791	0.487791	0.487791	0.487791	38	0	18	0	0	0	0.78676	29.8969	0	10.7076	0	0	0	Col mop
1	Col mop	T	0.2	0.25	0.3	0.1375	1	1			1												0.0118791	0.0296979	0.0593957	0.118791	0.178187	0.237583	0.296979	0.0118791	0.0118791	0.0118791	0.0118791	0.0118791	0.0118791	0	5.5	0	0	0	0	0.0125705	0	0.0691379	0	0	0	0	Col mop
1	Col mop	T	0.4	0.45	0.3	0.1875	1	1						1									0.0441786	0.0552233	0.110447	0.220893	0.33134	0.441786	0.552233	0.0441786	0.0441786	0.0441786	0.0441786	0.0441786	0.0441786	0	0	0	5.5	0	0	0.0441786	0	0	0	0.257124	0	0	Col mop
1	Col mop	T	0.65	0.6	0.25	0.2125	2	2	3														0.0307061	0.0139764	0.111811	0.89449	3.0189	7.15592	13.9764	0.0139764	0.0307061	0.0307061	0.0307061	0.0307061	0.0307061	38	0	0	0	0	0	0.049526	1.88199	0	0	0	0	0	Col mop
2	Dri mos	T	1.65	1.9	1.35	0.8125	1	1	1		1												3.422	1.03697	2.07394	4.14788	6.22183	8.29577	10.3697	1.03697	2.07394	3.422	3.422	3.422	3.422	5.5	5.5	0	0	0	0	3.84495	21.1472	21.1472	0	0	0	0	Dri mos
2	Mae par	T	0.65	0.7	0.5	0.3	1	1			1												0.183783	0.141372	0.282743	0.565487	0.84823	1.13097	1.41372	0.141372	0.183783	0.183783	0.183783	0.183783	0.183783	0	5.5	0	0	0	0	0.19448	0	1.06964	0	0	0	0	Mae par
2	Sec vir	T	1.2	1.1	0.85	0.4875	1	1	4														0.895943	0.37331	0.746619	1.49324	2.23986	2.98648	3.7331	0.37331	0.746619	0.895943	0.895943	0.895943	0.895943	63	0	0	0	0	0	2.42147	152.552	0	0	0	0	0	Sec vir
2	Sec vir	T	3	3.3	1.3	1.15	3	3	1														4.1506	1.74863	2.92079	3.99688	4.1506	4.30433	5.38041	1.74863	2.92079	3.99688	4.1506	4.1506	4.1506	5.5	0	0	0	0	0	4.39217	24.1569	0	0	0	0	0	Sec vir
2	Dri mos	T	3	1.3	2	0.825	1	1			1												6.41474	1.06912	2.13825	4.27649	6.41474	8.55299	10.6912	1.06912	2.13825	4.27649	6.41474	6.41474	6.41474	0	5.5	0	0	0	0	6.78808	0	37.3345	0	0	0	0	Dri mos
2	Hip ind	T	1.1	2.05	1.4	0.8625	1	1			1												2.57076	1.16853	2.33705	4.6741	7.01115	9.3482	11.6853	1.16853	2.33705	2.57076	2.57076	2.57076	2.57076	0	5.5	0	0	0	0	2.72038	0	14.9621	0	0	0	0	Hip ind
2	Com mos	T	4	4.95	2.45	1.85	1	1			1												43.0084	5.37605	10.7521	21.5042	32.2563	43.0084	53.7605	5.37605	10.7521	21.5042	32.2563	43.0084	43.0084	0	5.5	0	0	0	0	45.5115	0	250.313	0	0	0	0	Com mos
2	Hip ind	T	1	0.45	0.4	0.2125	1	1			2												0.141863	0.0709313	0.141863	0.283725	0.425588	0.56745	0.709313	0.0709313	0.141863	0.141863	0.141863	0.141863	0.141863	0	18	0	0	0	0	0.173003	0	3.11406	0	0	0	0	Hip ind
2	Hip ind	T	1	1.7	0.5	0.55	1	1			1												0.950332	0.475166	0.950332	1.90066	2.851	3.80133	4.75166	0.475166	0.950332	0.950332	0.950332	0.950332	0.950332	0	5.5	0	0	0	0	1.00564	0	5.53103	0	0	0	0	Hip ind
2	Hip ind	T	0.5	0.35	0.6	0.2375	1	1			2												0.0886027	0.0886027	0.177205	0.354411	0.531616	0.708822	0.886027	0.0886027	0.0886027	0.0886027	0.0886027	0.0886027	0.0886027	0	18	0	0	0	0	0.108052	0	1.94494	0	0	0	0	Hip ind
2	Hip ind	T	0.55	0.5	0.65	0.2875	1	1			2			1									0.14282	0.129836	0.259672	0.519345	0.779017	1.03869	1.29836	0.129836	0.14282	0.14282	0.14282	0.14282	0.14282	0	18	0	5.5	0	0	0.17417	0	3.13507	0	0.831226	0	0	Hip ind
2	Hip ind	T	1.5	1.9	2	0.975	1	1	2		1												4.47971	1.49324	2.98648	5.97295	8.95943	11.9459	14.9324	1.49324	2.98648	4.47971	4.47971	4.47971	4.47971	18	5.5	0	0	0	0	5.85584	105.405	32.2071	0	0	0	0	Hip ind
[truncated: 34 more columns]

## Sheet: Site5
Date:	23/8/2014									Total	T	C	%C						Total	T	C	%C
Site No. :	GNP7								Col mop	37	37	0	0					Col mop	37	37	0	0
			Trans 1						Trans 1a: Col mop seedlings (<0.5) and Mae par						Trans 2 shrub extension for species EXCLUDING Col mop, Mae pae and Pav gra			ALL SPECIES 1	40	40	0	0
			Width (m)	Length (m)	Area (ha)				Width (m)	Length (m)	Area (ha)				Width (m)	Length (m)	Area (ha)	Shrub density (no/ha) 1	3200
	Transect Dimensions:		5	25	0.0125				1	25	0.0025				25	50	0.125
	Co-ordinates:			X	Y					X	Y					X	Y
			NW Corner						NW Corner						NW Corner
			SW Corner						SW Corner						SW Corner
			NE Corner						NE Corner						NE Corner
			SE Corner						SE Corner						SE Corner
									OED		OUD	NED		NUD	NFD	OFD	OBE	OBU	NBE	NBU	RE	Notes	Canopy volume (m3)																				Damage
Trans. No.	Sp. Code	Coppice	Height (m)	D1 (m)	D2 (m)	R	Shape	Adj. shape	Score	Eaten		Score	Eaten										Total	0.5	1	2	3	4	5	0.5	1	2	3	4	5	OED	OUD	NED	NUD	NFD	OFD	Old Rec. Vol.	OED	OUD	NED	NUD	NFD	OFD	Sp. Code
1a	Col mop	T	0.55	0.7	0.35	0.2625	3	3	3														0.0396475	0.0396177	0.0613627	0.76614	3.54414	9.82518	21.0391	0.0396177	0.0396475	0.0396475	0.0396475	0.0396475	0.0396475	38	0	0	0	0	0	0.0639475	2.43001	0	0	0	0	0	Col mop
1a	Col mop	T	0.6	0.78	0.75	0.3825	3	3	2														0.091835	0.0914098	0.119045	1.25848	5.96928	16.8024	36.3088	0.0914098	0.091835	0.091835	0.091835	0.091835	0.091835	18	0	0	0	0	0	0.111994	2.01589	0	0	0	0	0	Col mop
1a	Col mop	T	0.3	0.25	0.45	0.175	3	3															0.00961151	0.0124594	0.131713	1.75855	7.0164	18.0412	36.9687	0.00961151	0.00961151	0.00961151	0.00961151	0.00961151	0.00961151	0	0	0	0	0	0	0.00961151	0	0	0	0	0	0	Col mop
1a	Col mop	T	0.15	0.35	0.35	0.175	1	1															0.0144317	0.0481056	0.0962113	0.192423	0.288634	0.384845	0.481056	0.0144317	0.0144317	0.0144317	0.0144317	0.0144317	0.0144317	0	0	0	0	0	0	0.0144317	0	0	0	0	0	0	Col mop
1a	Col mop	T	0.15	0.3	0.12	0.105	3	3															0.00173007	0.0237084	0.316539	3.24741	11.8683	29.2549	58.4828	0.00173007	0.00173007	0.00173007	0.00173007	0.00173007	0.00173007	0	0	0	0	0	0	0.00173007	0	0	0	0	0	0	Col mop
1a	Mae par	T	0.15	0.5	0.3	0.2	6	1															0.0188496	0.0628319	0.125664	0.251327	0.376991	0.502655	0.628319	0.0188496	0.0188496	0.0188496	0.0188496	0.0188496	0.0188496	0	0	0	0	0	0	0.0188496	0	0	0	0	0	0	Mae par
1a	Col mop	T	0.75	0.65	0.95	0.4	3	3			1												0.125538	0.120888	0.130188	0.706733	3.51507	10.3406	22.9688	0.120888	0.125538	0.125538	0.125538	0.125538	0.125538	0	5.5	0	0	0	0	0.132844	0	0.730645	0	0	0	0	Col mop
1a	Col mop	T	1.5	0.6	0.4	0.25	2	2	2														0.0980766	0.00363247	0.0290597	0.232478	0.784613	1.85982	3.63247	0.00363247	0.0290597	0.0980766	0.0980766	0.0980766	0.0980766	18	0	0	0	0	0	0.119606	2.1529	0	0	0	0	0	Col mop
1a	Mae par	T	0.1	0.5	0.35	0.2125	1	1															0.0141863	0.0709313	0.141863	0.283725	0.425588	0.56745	0.709313	0.0141863	0.0141863	0.0141863	0.0141863	0.0141863	0.0141863	0	0	0	0	0	0	0.0141863	0	0	0	0	0	0	Mae par
1a	Mae par	T	0.1	0.25	0.1	0.0875	1	1															0.00240528	0.0120264	0.0240528	0.0481056	0.0721585	0.0962113	0.120264	0.00240528	0.00240528	0.00240528	0.00240528	0.00240528	0.00240528	0	0	0	0	0	0	0.00240528	0	0	0	0	0	0	Mae par
1a	Pav gra	T	0.8	0.5	0.55	0.2625	3	3			1												0.057669	0.0546279	0.0585701	0.252302	1.257	3.74849	8.40256	0.0546279	0.057669	0.057669	0.057669	0.057669	0.057669	0	5.5	0	0	0	0	0.0610254	0	0.33564	0	0	0	0	Pav gra
1a	Col mop	T	0.5	0.8	0.6	0.35	3	3	2														0.0640767	0.0640767	0.128153	1.79415	8.07367	22.0424	46.776	0.0640767	0.0640767	0.0640767	0.0640767	0.0640767	0.0640767	18	0	0	0	0	0	0.0781423	1.40656	0	0	0	0	0	Col mop
1a	Col mop	T	0.35	0.32	0.2	0.13	3	3			1												0.00618798	0.00667508	0.0458235	0.654519	2.69204	7.02435	14.5174	0.00618798	0.00618798	0.00618798	0.00618798	0.00618798	0.00618798	0	5.5	0	0	0	0	0.00654813	0	0.0360147	0	0	0	0	Col mop
1a	Col mop	T	0.7	0.5	0.48	0.245	3	3						1									0.0439566	0.0429314	0.0474168	0.32551	1.6032	4.64941	10.2331	0.0429314	0.0439566	0.0439566	0.0439566	0.0439566	0.0439566	0	0	0	5.5	0	0	0.0439566	0	0	0	0.255832	0	0	Col mop
1a	Col mop	T	0.9	0.77	0.3	0.2675	3	3															0.0673727	0.061458	0.0674652	0.190381	0.923256	2.8206	6.43692	0.061458	0.0673727	0.0673727	0.0673727	0.0673727	0.0673727	0	0	0	0	0	0	0.0673727	0	0	0	0	0	0	Col mop
1a	Col mop	T	0.85	0.6	0.4	0.25	3	3	2														0.0555767	0.0516967	0.0558822	0.193212	0.954974	2.88415	6.52373	0.0516967	0.0555767	0.0555767	0.0555767	0.0555767	0.0555767	18	0	0	0	0	0	0.0677765	1.21998	0	0	0	0	0	Col mop
1a	Col mop	T	1.1	1.05	1.1	0.5375	3	3	3														0.332463	0.27851	0.332214	0.514556	2.04574	6.42446	15.1494	0.27851	0.332214	0.332463	0.332463	0.332463	0.332463	38	0	0	0	0	0	0.536231	20.3768	0	0	0	0	0	Col mop
1a	Col mop	T	0.8	0.5	0.6	0.275	3	3	3														0.0632921	0.0599544	0.064281	0.276903	1.37957	4.11399	9.22186	0.0599544	0.0632921	0.0632921	0.0632921	0.0632921	0.0632921	38	0	0	0	0	0	0.102084	3.87919	0	0	0	0	0	Col mop
1a	Col mop	T	0.85	0.8	0.4	0.3	3	3	1														0.0800305	0.0744432	0.0804703	0.278225	1.37516	4.15318	9.39418	0.0744432	0.0800305	0.0800305	0.0800305	0.0800305	0.0800305	5.5	0	0	0	0	0	0.0846884	0.465786	0	0	0	0	0	Col mop
1a	Mae par	T	0.2	0.16	0.14	0.075	1	1			1												0.00353429	0.00883573	0.0176715	0.0353429	0.0530144	0.0706858	0.0883573	0.00353429	0.00353429	0.00353429	0.00353429	0.00353429	0.00353429	0	5.5	0	0	0	0	0.00373999	0	0.02057	0	0	0	0	Mae par
1a	Mae par	T	0.1	0.15	0.1	0.0625	1	1			1												0.00122718	0.00613592	0.0122718	0.0245437	0.0368155	0.0490874	0.0613592	0.00122718	0.00122718	0.00122718	0.00122718	0.00122718	0.00122718	0	5.5	0	0	0	0	0.00129861	0	0.00714234	0	0	0	0	Mae par
1a	Mae par	T	0.2	0.23	0.1	0.0825	1	1			1												0.00427649	0.0106912	0.0213825	0.0427649	0.0641474	0.0855299	0.106912	0.00427649	0.00427649	0.00427649	0.00427649	0.00427649	0.00427649	0	5.5	0	0	0	0	0.00452539	0	0.0248896	0	0	0	0	Mae par
1a	Bos mos	T	3	4.35	3.85	2.05	1	1															39.6076	6.60127	13.2025	26.4051	39.6076	52.8102	66.0127	6.60127	13.2025	26.4051	39.6076	39.6076	39.6076	0	0	0	0	0	0	39.6076	0	0	0	0	0	0	Bos mos
1a	Pav gra	T	0.6	0.7	0.7	0.35	1	1			1												0.230907	0.192423	0.384845	0.76969	1.15454	1.53938	1.92423	0.192423	0.230907	0.230907	0.230907	0.230907	0.230907	0	5.5	0	0	0	0	0.244346	0	1.3439	0	0	0	0	Pav gra
1	Col mop	T	1.4	1.9	2.1	1	3	3	2		2												1.46461	1.07551	1.43045	1.5799	3.65085	10.8458	26.3673	1.07551	1.43045	1.46461	1.46461	1.46461	1.46461	18	18	0	0	0	0	2.28845	41.1922	41.1922	0	0	0	0	Col mop
1	Col mop	T	1	1.2	1.4	0.65	3	3				4											0.441999	0.386749	0.441999	0.883997	3.97799	12.376	28.7299	0.386749	0.441999	0.441999	0.441999	0.441999	0.441999	0	0	63	0	0	0	0.441999	0	0	75.2592	0	0	0	Col mop
1	Com api	T	2	1.65	1.7	0.8375	3	3	4														1.46755	0.848429	1.28411	1.46755	1.651	2.93511	6.42054	0.848429	1.28411	1.46755	1.46755	1.46755	1.46755	63	0	0	0	0	0	3.96636	249.881	0	0	0	0	0	Com api
1	Cou gla	T	0.9	1.05	0.8	0.4625	1	1			1												0.604806	0.336003	0.672006	1.34401	2.01602	2.68803	3.36003	0.336003	0.604806	0.604806	0.604806	0.604806	0.604806	0	5.5	0	0	0	0	0.640006	0	3.52003	0	0	0	0	Cou gla
1	Col mop	T	1.2	0.6	0.8	0.35	2	2															0.153784	0.0111244	0.0889954	0.711963	2.40288	5.69571	11.1244	0.0111244	0.0889954	0.153784	0.153784	0.153784	0.153784	0	0	0	0	0	0	0.153784	0	0	0	0	0	0	Col mop
1	Col mop	T	0.9	0.95	1.1	0.5125	2	2	2														0.2473	0.042404	0.339232	2.71386	9.15926	21.7108	42.404	0.042404	0.2473	0.2473	0.2473	0.2473	0.2473	18	0	0	0	0	0	0.301586	5.42854	0	0	0	0	0	Col mop
1	Col mop	T	0.9	1.5	1.2	0.675	3	3				2											0.428987	0.391326	0.429575	1.21223	5.87871	17.9598	40.9862	0.391326	0.428987	0.428987	0.428987	0.428987	0.428987	0	0	18	0	0	0	0.428987	0	0	9.41679	0	0	0	Col mop
1	Col mop	T	0.7	1.35	0.73	0.52	1	1	2														0.594641	0.424743	0.849487	1.69897	2.54846	3.39795	4.24743	0.424743	0.594641	0.594641	0.594641	0.594641	0.594641	18	0	0	0	0	0	0.725172	13.0531	0	0	0	0	0	Col mop
1	Col mop	T	0.8	1.35	1.1	0.6125	3	3	3			2											0.313976	0.297419	0.318882	1.37364	6.84369	20.4084	45.7473	0.297419	0.313976	0.313976	0.313976	0.313976	0.313976	38	0	18	0	0	0	0.506413	19.2437	0	6.89215	0	0	0	Col mop
1	Col mop	T	0.75	0.8	0.8	0.4	3	3			1												0.125538	0.120888	0.130188	0.706733	3.51507	10.3406	22.9688	0.120888	0.125538	0.125538	0.125538	0.125538	0.125538	0	5.5	0	0	0	0	0.132844	0	0.730645	0	0	0	0	Col mop
1	Col mop	T	0.7	0.9	0.7	0.4	1	1	3			2											0.351858	0.251327	0.502655	1.00531	1.50796	2.01062	2.51327	0.251327	0.351858	0.351858	0.351858	0.351858	0.351858	38	0	18	0	0	0	0.567514	21.5655	0	7.72372	0	0	0	Col mop
1	Col mop	T	0.6	0.68	0.6	0.32	3	3			1												0.0642755	0.0639779	0.0833201	0.880812	4.17791	11.76	25.4126	0.0639779	0.0642755	0.0642755	0.0642755	0.0642755	0.0642755	0	5.5	0	0	0	0	0.0680164	0	0.37409	0	0	0	0	Col mop
1	Col mop	T	0.6	0.8	0.35	0.2875	3	3				2											0.0518825	0.0516423	0.0672551	0.710983	3.37236	9.49258	20.5128	0.0516423	0.0518825	0.0518825	0.0518825	0.0518825	0.0518825	0	0	18	0	0	0	0.0518825	0	0	1.13888	0	0	0	Col mop
1	Col mop	T	0.8	1	1	0.5	3	3	2			2											0.20923	0.198196	0.212499	0.915382	4.56056	13.6	30.4855	0.198196	0.20923	0.20923	0.20923	0.20923	0.20923	18	0	18	0	0	0	0.255159	4.59286	0	4.59286	0	0	0	Col mop
1	Col mop	T	0.8	0.6	0.6	0.3	3	3	2														0.0753228	0.0713507	0.0764997	0.329537	1.6418	4.89598	10.9748	0.0713507	0.0753228	0.0753228	0.0753228	0.0753228	0.0753228	18	0	0	0	0	0	0.0918571	1.65343	0	0	0	0	0	Col mop
1	Col mop	T	0.8	0.5	0.25	0.1875	3	3			1												0.029423	0.0278714	0.0298827	0.128726	0.641329	1.91249	4.28702	0.0278714	0.029423	0.029423	0.029423	0.029423	0.029423	0	5.5	0	0	0	0	0.0311354	0	0.171245	0	0	0	0	Col mop
1	Col mop	T	0.9	0.8	0.6	0.35	3	3	1														0.115338	0.105212	0.115496	0.325921	1.58056	4.82869	11.0196	0.105212	0.115338	0.115338	0.115338	0.115338	0.115338	5.5	0	0	0	0	0	0.122051	0.67128	0	0	0	0	0	Col mop
1	Col mop	T	0.7	0.85	0.4	0.3125	3	3	3														0.0715142	0.0698462	0.0771436	0.52958	2.60829	7.56424	16.6484	0.0698462	0.0715142	0.0715142	0.0715142	0.0715142	0.0715142	38	0	0	0	0	0	0.115345	4.38313	0	0	0	0	0	Col mop
1	Col mop	T	0.9	0.83	0.35	0.295	3	3	2														0.0819371	0.0747437	0.0820495	0.231537	1.12284	3.43034	7.82842	0.0747437	0.0819371	0.0819371	0.0819371	0.0819371	0.0819371	18	0	0	0	0	0	0.0999233	1.79862	0	0	0	0	0	Col mop
1	Col mop	T	0.75	0.65	0.4	0.2625	3	3															0.0540647	0.0520623	0.0560671	0.304364	1.51381	4.45333	9.89184	0.0520623	0.0540647	0.0540647	0.0540647	0.0540647	0.0540647	0	0	0	0	0	0	0.0540647	0	0	0	0	0	0	Col mop
1	Col mop	T	0.7	0.7	0.7	0.35	3	3	2														0.0897074	0.0876151	0.0967689	0.664305	3.27184	9.48858	20.8838	0.0876151	0.0897074	0.0897074	0.0897074	0.0897074	0.0897074	18	0	0	0	0	0	0.109399	1.96919	0	0	0	0	0	Col mop
1	Col mop	T	1.1	1.3	1.65	0.7375	1	1	3			2											1.87961	0.854366	1.70873	3.41746	5.1262	6.83493	8.54366	0.854366	1.70873	1.87961	1.87961	1.87961	1.87961	38	0	18	0	0	0	3.03162	115.202	0	41.2596	0	0	0	Col mop
1	Col mop	T	1.1	0.8	0.75	0.3875	2	2	4														0.172795	0.0162279	0.129823	1.03859	3.50523	8.30868	16.2279	0.0162279	0.129823	0.172795	0.172795	0.172795	0.172795	63	0	0	0	0	0	0.467012	29.4218	0	0	0	0	0	Col mop
1	Cou gla	T	0.8	1.05	0.7	0.4375	3	3			1												0.160192	0.151744	0.162695	0.700839	3.49168	10.4125	23.3404	0.151744	0.160192	0.160192	0.160192	0.160192	0.160192	0	5.5	0	0	0	0	0.169515	0	0.932333	0	0	0	0	Cou gla
1	Col mop	T	0.55	0.35	0.3	0.1625	3	3	3														0.0151937	0.0151823	0.0235154	0.2936	1.35819	3.76521	8.06259	0.0151823	0.0151937	0.0151937	0.0151937	0.0151937	0.0151937	38	0	0	0	0	0	0.024506	0.931227	0	0	0	0	0	Col mop
1	Com api	T	0.85	0.7	0.5	0.3	3	3	4														0.0800305	0.0744432	0.0804703	0.278225	1.37516	4.15318	9.39418	0.0744432	0.0800305	0.0800305	0.0800305	0.0800305	0.0800305	63	0	0	0	0	0	0.216299	13.6268	0	0	0	0	0	Com api
1	Hip cre	T	1.2	1.7	0.95	0.6625	3	3			1												0.550994	0.441624	0.548443	0.714252	2.4106	7.55066	18.0476	0.441624	0.548443	0.550994	0.550994	0.550994	0.550994	0	5.5	0	0	0	0	0.583063	0	3.20685	0	0	0	0	Hip cre
1	Pav gra	T	1.1	0.4	0.4	0.2	3	3			1												0.0460306	0.0385606	0.045996	0.071242	0.283239	0.889487	2.09749	0.0385606	0.045996	0.0460306	0.0460306	0.0460306	0.0460306	0	5.5	0	0	0	0	0.0487096	0	0.267903	0	0	0	0	Pav gra
1	Pav gra	T	0.6	0.45	0.2	0.1625	3	3			2												0.0165749	0.0164982	0.021486	0.227138	1.07737	3.0326	6.55324	0.0164982	0.0165749	0.0165749	0.0165749	0.0165749	0.0165749	0	18	0	0	0	0	0.0202133	0	0.36384	0	0	0	0	Pav gra
1	Pav gra	T	1.1	1	0.7	0.425	3	3			2												0.207857	0.174125	0.207701	0.321702	1.279	4.01659	9.47147	0.174125	0.207701	0.207857	0.207857	0.207857	0.207857	0	18	0	0	0	0	0.253484	0	4.56271	0	0	0	0	Pav gra
1	Pav gra	T	1.1	0.5	0.5	0.25	3	3															0.0719228	0.0602509	0.0718688	0.111316	0.442561	1.38982	3.27733	0.0602509	0.0718688	0.0719228	0.0719228	0.0719228	0.0719228	0	0	0	0	0	0	0.0719228	0	0	0	0	0	0	Pav gra
1	Pav gra	T	1	1.3	1.1	0.6	1	1			1												1.13097	0.565487	1.13097	2.26195	3.39292	4.52389	5.65487	0.565487	1.13097	1.13097	1.13097	1.13097	1.13097	0	5.5	0	0	0	0	1.1968	0	6.58238	0	0	0	0	Pav gra
1	Pav gra	T	1.3	0.35	0.72	0.2675	3	3			2												0.0973162	0.0746371	0.0961202	0.112509	0.314938	0.969175	2.34099	0.0746371	0.0961202	0.0973162	0.0973162	0.0973162	0.0973162	0	18	0	0	0	0	0.118678	0	2.13621	0	0	0	0	Pav gra
1	Pav gra	T	1	1.1	1.05	0.5375	3	3			2												0.302239	0.264459	0.302239	0.604479	2.72015	8.4627	19.6456	0.264459	0.302239	0.302239	0.302239	0.302239	0.302239	0	18	0	0	0	0	0.368585	0	6.63452	0	0	0	0	Pav gra
1	Pav gra	T	0.7	0.4	0.6	0.25	3	3			2												0.0457691	0.0447016	0.0493719	0.338931	1.6693	4.84111	10.655	0.0447016	0.0457691	0.0457691	0.0457691	0.0457691	0.0457691	0	18	0	0	0	0	0.0558159	0	1.00469	0	0	0	0	Pav gra
1	Pav gra	T	0.65	0.5	0.4	0.225	3	3			2												0.0344249	0.0340018	0.0397994	0.342839	1.66123	4.74709	10.3525	0.0340018	0.0344249	0.0344249	0.0344249	0.0344249	0.0344249	0	18	0	0	0	0	0.0419816	0	0.755668	0	0	0	0	Pav gra
1	Com api	T	0.75	0.95	0.75	0.425	3	3	4														0.141721	0.136472	0.14697	0.797835	3.96818	11.6736	25.9296	0.136472	0.141721	0.141721	0.141721	0.141721	0.141721	63	0	0	0	0	0	0.383029	24.1308	0	0	0	0	0	Com api
1	Pav gra	T	1.3	1.15	0.75	0.475	2	2			2												0.306849	0.0174584	0.139667	1.11734	3.77102	8.9387	17.4584	0.0174584	0.139667	0.306849	0.306849	0.306849	0.306849	0	18	0	0	0	0	0.374206	0	6.73571	0	0	0	0	Pav gra
1	Dio lou	T	2.1	1.3	1.4	0.675	3	3	1														1.00097	0.558256	0.857109	1.00086	1.07976	1.74232	3.63704	0.558256	0.857109	1.00086	1.00097	1.00097	1.00097	5.5	0	0	0	0	0	1.05923	5.82575	0	0	0	0	0	Dio lou
1	Pav gra	T	0.9	0.55	0.6	0.2875	3	3			2												0.0778238	0.0709915	0.0779305	0.219914	1.06647	3.25814	7.43543	0.0709915	0.0778238	0.0778238	0.0778238	0.0778238	0.0778238	0	18	0	0	0	0	0.094907	0	1.70833	0	0	0	0	Pav gra
2	Cou gla	T	1.1	2	1.8	0.95	3	3			1												1.03857	0.870023	1.03779	1.6074	6.39057	20.0691	47.3246	0.870023	1.03779	1.03857	1.03857	1.03857	1.03857	0	5.5	0	0	0	0	1.09901	0	6.04456	0	0	0	0	Cou gla
2	Com api	T	0.6	1	0.9	0.475	1	1	5														0.425293	0.354411	0.708822	1.41764	2.12647	2.83529	3.54411	0.354411	0.425293	0.425293	0.425293	0.425293	0.425293	83	0	0	0	0	0	2.50172	207.643	0	0	0	0	0	Com api
2	Com api	T	1.3	1.15	1.2	0.5875	1	1	5														1.40964	0.54217	1.08434	2.16868	3.25302	4.33736	5.4217	0.54217	1.08434	1.40964	1.40964	1.40964	1.40964	83	0	0	0	0	0	8.29201	688.237	0	0	0	0	0	Com api
2	Com api	T	1.4	0.5	0.8	0.325	1	1	5														0.464563	0.165915	0.331831	0.663661	0.995492	1.32732	1.65915	0.165915	0.331831	0.464563	0.464563	0.464563	0.464563	83	0	0	0	0	0	2.73272	226.816	0	0	0	0	0	Com api
2	Com api	T	0.9	0.77	0.65	0.355	1	1	4														0.356327	0.19796	0.395919	0.791838	1.18776	1.58368	1.9796	0.19796	0.356327	0.356327	0.356327	0.356327	0.356327	63	0	0	0	0	0	0.963047	60.6719	0	0	0	0	0	Com api
2	Hip ind	T	1	0.85	1.5	0.5875	1	1			3												1.08434	0.54217	1.08434	2.16868	3.25302	4.33736	5.4217	0.54217	1.08434	1.08434	1.08434	1.08434	1.08434	0	38	0	0	0	0	1.74894	0	66.4596	0	0	0	0	Hip ind
2	Hip cre	T	1.7	1.8	1.8	0.9	1	1	3					2									4.32597	1.27235	2.54469	5.08938	7.63407	10.1788	12.7235	1.27235	2.54469	4.32597	4.32597	4.32597	4.32597	38	0	0	18	0	0	6.97738	265.14	0	0	94.9604	0	0	Hip cre
2	Hip cre	T	0.9	0.4	0.55	0.2375	2	2	3														0.0531085	0.00910639	0.0728511	0.582809	1.96698	4.66247	9.10639	0.00910639	0.0531085	0.0531085	0.0531085	0.0531085	0.0531085	38	0	0	0	0	0	0.0856588	3.25504	0	0	0	0	0	Hip cre
2	Hip cre	T	0.5	1.25	0.65	0.475	3	3			2												0.118019	0.118019	0.236038	3.30453	14.8704	40.5985	86.1538	0.118019	0.118019	0.118019	0.118019	0.118019	0.118019	0	18	0	0	0	0	0.143925	0	2.59066	0	0	0	0	Hip cre
2	Com api	T	0.9	1.3	0.9	0.55	1	1	5														0.855299	0.475166	0.950332	1.90066	2.851	3.80133	4.75166	0.475166	0.855299	0.855299	0.855299	0.855299	0.855299	83	0	0	0	0	0	5.03117	417.587	0	0	0	0	0	Com api
2	Com api	T	0.9	0.35	0.45	0.2	2	2	5														0.0376614	0.00645772	0.0516617	0.413294	1.39487	3.30635	6.45772	0.00645772	0.0376614	0.0376614	0.0376614	0.0376614	0.0376614	83	0	0	0	0	0	0.221538	18.3876	0	0	0	0	0	Com api
2	Com api	T	0.75	0.9	1.05	0.4875	1	1	5														0.559964	0.37331	0.746619	1.49324	2.23986	2.98648	3.7331	0.37331	0.559964	0.559964	0.559964	0.559964	0.559964	83	0	0	0	0	0	3.29391	273.394	0	0	0	0	0	Com api
2	Com api	T	0.75	1.55	1	0.6375	1	1	5														0.957572	0.638381	1.27676	2.55353	3.83029	5.10705	6.38381	0.638381	0.957572	0.957572	0.957572	0.957572	0.957572	83	0	0	0	0	0	5.63278	467.521	0	0	0	0	0	Com api
2	Hip ind	T	1.2	0.95	1.1	0.5125	3	3			1												0.329734	0.264283	0.328207	0.427432	1.44258	4.51857	10.8003	0.264283	0.328207	0.329734	0.329734	0.329734	0.329734	0	5.5	0	0	0	0	0.348924	0	1.91908	0	0	0	0	Hip ind
2	Com api	T	1.3	1.15	1.1	0.5625	2	2	5														0.430311	0.0244829	0.195863	1.5669	5.2883	12.5352	24.4829	0.0244829	0.195863	0.430311	0.430311	0.430311	0.430311	83	0	0	0	0	0	2.53124	210.093	0	0	0	0	0	Com api
2	Com api	T	1.1	1.1	1.3	0.6	1	1	4														1.24407	0.565487	1.13097	2.26195	3.39292	4.52389	5.65487	0.565487	1.13097	1.24407	1.24407	1.24407	1.24407	63	0	0	0	0	0	3.36235	211.828	0	0	0	0	0	Com api
2	Com api	T	1.15	1.1	3.8	1.225	1	1	5														5.42151	2.35718	4.71435	9.4287	14.1431	18.8574	23.5718	2.35718	4.71435	5.42151	5.42151	5.42151	5.42151	83	0	0	0	0	0	31.8912	2646.97	0	0	0	0	0	Com api
2	Hip cre	T	1.9	2.85	4.35	1.8	1	1	2			2											19.3396	5.08938	10.1788	20.3575	30.5363	40.715	50.8938	5.08938	10.1788	19.3396	19.3396	19.3396	19.3396	18	0	18	0	0	0	23.5849	424.529	0	424.529	0	0	0	Hip cre
2	Hip cre	T	0.75	0.6	0.75	0.3375	3	3			3												0.0893723	0.0860622	0.0926824	0.503133	2.50242	7.36163	16.3518	0.0860622	0.0893723	0.0893723	0.0893723	0.0893723	0.0893723	0	38	0	0	0	0	0.144149	0	5.47766	0	0	0	0	Hip cre
2	Hip cre	T	1	0.85	0.6	0.3625	1	1			3			2									0.412825	0.206412	0.412825	0.82565	1.23847	1.6513	2.06412	0.206412	0.412825	0.412825	0.412825	0.412825	0.412825	0	38	0	18	0	0	0.665847	0	25.3022	0	9.06201	0	0	Hip cre
2	Com api	T	0.5	0.6	0.4	0.25	1	1	4														0.0981748	0.0981748	0.19635	0.392699	0.589049	0.785398	0.981748	0.0981748	0.0981748	0.0981748	0.0981748	0.0981748	0.0981748	63	0	0	0	0	0	0.265337	16.7162	0	0	0	0	0	Com api
2	Com api	T	0.9	0.6	0.3	0.225	3	3	4														0.0476652	0.0434806	0.0477306	0.134692	0.65319	1.99553	4.55402	0.0434806	0.0476652	0.0476652	0.0476652	0.0476652	0.0476652	63	0	0	0	0	0	0.128825	8.11597	0	0	0	0	0	Com api
2	Hip cre	T	1.05	1.05	1.68	0.6825	3	3			2			1									0.511669	0.438131	0.511613	0.890627	3.78903	11.8588	27.752	0.438131	0.511613	0.511669	0.511669	0.511669	0.511669	0	18	0	5.5	0	0	0.623986	0	11.2317	0	2.97797	0	0	Hip cre
[truncated: 34 more columns]

## Sheet: Site6
Date:	23/8/2014													Total	T	C	%C
Site No. :	GNP9												Col mop	77	76	1	1.2987
			Trans 1						Trans 2 shrub extension for species EXCLUDING Col mop & Mae pae				ALL SPECIES 1	89	88	1	1.1236
			Width (m)	Length (m)	Area (ha)				Width (m)	Length (m)	Area (ha)		Shrub density (no/ha) 1	7120
	Transect Dimensions:		5	25	0.0125				25	50	0.125		ALL SPECIES 2	12	12	0	0
													Shrub density (no/ha) 2	96
	Co-ordinates:			X	Y					X	Y		TOTAL Shrub density (no/ha)	7216
			NW Corner						NW Corner
			SW Corner						SW Corner
			NE Corner						NE Corner
			SE Corner						SE Corner
									OED		OUD	NED		NUD	NFD	OFD	OBE	OBU	NBE	NBU	RE	Notes	Canopy volume (m3)																				Damage
Trans. No.	Sp. Code	Coppice	Height (m)	D1 (m)	D2 (m)	R	Shape	Adj. shape	Score	Eaten		Score	Eaten										Total	0.5	1	2	3	4	5	0.5	1	2	3	4	5	OED	OUD	NED	NUD	NFD	OFD	Old Rec. Vol.	OED	OUD	NED	NUD	NFD	OFD	Sp. Code
1	Col mop	T	2.9	2.4	2.7	1.275	3	3	2			1											4.93188	2.13643	3.54487	4.78446	4.93208	5.20103	6.80461	2.13643	3.54487	4.78446	4.93188	4.93188	4.93188	18	0	5.5	0	0	0	6.01449	108.261	0	28.7041	0	0	0	Col mop
1	Tri all	T	0.8	0.4	0.25	0.1625	3	3			1												0.0220999	0.0209345	0.0224452	0.0966872	0.481709	1.4365	3.22003	0.0209345	0.0220999	0.0220999	0.0220999	0.0220999	0.0220999	0	5.5	0	0	0	0	0.0233862	0	0.128624	0	0	0	0	Tri all
1	Tri all	T	0.35	0.1	0.1	0.05	3	3															0.000915382	0.000987438	0.00677863	0.0968223	0.398231	1.0391	2.14754	0.000915382	0.000915382	0.000915382	0.000915382	0.000915382	0.000915382	0	0	0	0	0	0	0.000915382	0	0	0	0	0	0	Tri all
1	Tri all	T	0.55	0.3	0.2	0.125	3	3			1												0.00899035	0.0089836	0.0139144	0.173728	0.803661	2.22793	4.77076	0.0089836	0.00899035	0.00899035	0.00899035	0.00899035	0.00899035	0	5.5	0	0	0	0	0.0095136	0	0.0523248	0	0	0	0	Tri all
1	Sec vir	T	1	0.72	0.5	0.305	3	3	4														0.0973181	0.0851534	0.0973181	0.194636	0.875863	2.72491	6.32568	0.0851534	0.0973181	0.0973181	0.0973181	0.0973181	0.0973181	63	0	0	0	0	0	0.263022	16.5704	0	0	0	0	0	Sec vir
1	Col mop	C	2.2	2.5	2.75	1.3125	3	3	3			1											3.96475	2.13541	3.32133	3.96177	4.15539	6.13627	12.1385	2.13541	3.32133	3.96177	3.96475	3.96475	3.96475	38	0	5.5	0	0	0	6.39475	243.001	0	23.0752	0	0	0	Col mop
1	Col mop	T	2	0.7	0.85	0.3875	1	1	3														0.94346	0.235865	0.47173	0.94346	1.41519	1.88692	2.35865	0.235865	0.47173	0.94346	0.94346	0.94346	0.94346	38	0	0	0	0	0	1.52171	57.8249	0	0	0	0	0	Col mop
1	Col mop	T	1.85	1.3	1.05	0.5875	2	2	3			1											0.668008	0.0131879	0.105503	0.844027	2.84859	6.75222	13.1879	0.0131879	0.105503	0.668008	0.668008	0.668008	0.668008	38	0	5.5	0	0	0	1.07743	40.9424	0	3.88788	0	0	0	Col mop
1	Col mop	T	3	1.2	2.05	0.8125	3	3	2														2.07187	0.87287	1.45798	1.99513	2.07187	2.1486	2.68575	0.87287	1.45798	1.99513	2.07187	2.07187	2.07187	18	0	0	0	0	0	2.52667	45.48	0	0	0	0	0	Col mop
1	Col mop	T	0.5	0.5	0.45	0.2375	1	1			2												0.0886027	0.0886027	0.177205	0.354411	0.531616	0.708822	0.886027	0.0886027	0.0886027	0.0886027	0.0886027	0.0886027	0.0886027	0	18	0	0	0	0	0.108052	0	1.94494	0	0	0	0	Col mop
1	Col mop	T	3	1.9	2.5	1.1	3	3	2														3.79753	1.59988	2.67233	3.65688	3.79753	3.93817	4.92272	1.59988	2.67233	3.65688	3.79753	3.79753	3.79753	18	0	0	0	0	0	4.63113	83.3603	0	0	0	0	0	Col mop
1	Mae par	T	0.2	0.5	0.2	0.175	3	3															0.00640767	0.0280336	0.416499	4.6776	17.5891	43.9566	88.5861	0.00640767	0.00640767	0.00640767	0.00640767	0.00640767	0.00640767	0	0	0	0	0	0	0.00640767	0	0	0	0	0	0	Mae par
1	Col mop	T	0.55	0.45	0.35	0.2	1	1															0.069115	0.0628319	0.125664	0.251327	0.376991	0.502655	0.628319	0.0628319	0.069115	0.069115	0.069115	0.069115	0.069115	0	0	0	0	0	0	0.069115	0	0	0	0	0	0	Col mop
1	Mae par	T	0.1	0.25	0.48	0.1825	1	1			1												0.0104635	0.0523173	0.104635	0.209269	0.313904	0.418539	0.523173	0.0104635	0.0104635	0.0104635	0.0104635	0.0104635	0.0104635	0	5.5	0	0	0	0	0.0110725	0	0.0608985	0	0	0	0	Mae par
1	Col mop	T	0.45	0.5	0.45	0.2375	1	1			2												0.0797425	0.0886027	0.177205	0.354411	0.531616	0.708822	0.886027	0.0797425	0.0797425	0.0797425	0.0797425	0.0797425	0.0797425	0	18	0	0	0	0	0.0972469	0	1.75044	0	0	0	0	Col mop
1	Col mop	T	0.4	0.6	0.5	0.275	1	1				3											0.0950332	0.118791	0.237583	0.475166	0.712749	0.950332	1.18791	0.0950332	0.0950332	0.0950332	0.0950332	0.0950332	0.0950332	0	0	38	0	0	0	0.0950332	0	0	5.82461	0	0	0	Col mop
1	Col mop	T	2.35	1.4	1.35	0.6875	1	1	3														3.4895	0.742447	1.48489	2.96979	4.45468	5.93957	7.42447	0.742447	1.48489	2.96979	3.4895	3.4895	3.4895	38	0	0	0	0	0	5.62822	213.873	0	0	0	0	0	Col mop
1	Col mop	T	2.7	1.1	1.5	0.65	1	1	3														3.58377	0.663661	1.32732	2.65465	3.98197	5.30929	6.63661	0.663661	1.32732	2.65465	3.58377	3.58377	3.58377	38	0	0	0	0	0	5.78028	219.651	0	0	0	0	0	Col mop
1	Cou gla	T	1	2.4	1.5	0.975	1	1															2.98648	1.49324	2.98648	5.97295	8.95943	11.9459	14.9324	1.49324	2.98648	2.98648	2.98648	2.98648	2.98648	0	0	0	0	0	0	2.98648	0	0	0	0	0	0	Cou gla
1	Col mop	T	2.4	1.4	1.05	0.6125	1	1	3			1											2.82861	0.589294	1.17859	2.35718	3.53576	4.71435	5.89294	0.589294	1.17859	2.35718	2.82861	2.82861	2.82861	38	0	5.5	0	0	0	4.56228	173.367	0	16.4628	0	0	0	Col mop
1	Col mop	T	2.7	0.45	1.05	0.375	3	3	3														0.39721	0.18233	0.298064	0.390288	0.397755	0.441546	0.642745	0.18233	0.298064	0.390288	0.39721	0.39721	0.39721	38	0	0	0	0	0	0.640662	24.3451	0	0	0	0	0	Col mop
1	Mar acu	T	0.55	0.35	0.25	0.15	3	3			1												0.0129461	0.0129364	0.0200368	0.250168	1.15727	3.20822	6.8699	0.0129364	0.0129461	0.0129461	0.0129461	0.0129461	0.0129461	0	5.5	0	0	0	0	0.0136996	0	0.0753477	0	0	0	0	Mar acu
1	Col mop	T	0.45	0.85	0.45	0.325	1	1			1												0.149324	0.165915	0.331831	0.663661	0.995492	1.32732	1.65915	0.149324	0.149324	0.149324	0.149324	0.149324	0.149324	0	5.5	0	0	0	0	0.158015	0	0.86908	0	0	0	0	Col mop
1	Cou gla	T	0.5	2.2	1.75	0.9875	1	1				2											1.53177	1.53177	3.06354	6.12709	9.19063	12.2542	15.3177	1.53177	1.53177	1.53177	1.53177	1.53177	1.53177	0	0	18	0	0	0	1.53177	0	0	33.6243	0	0	0	Cou gla
1	Col mop	T	0.3	0.5	0.35	0.2125	3	3															0.0141721	0.0183712	0.19421	2.59296	10.3456	26.6015	54.51	0.0141721	0.0141721	0.0141721	0.0141721	0.0141721	0.0141721	0	0	0	0	0	0	0.0141721	0	0	0	0	0	0	Col mop
1	Cou gla	T	0.4	0.75	0.7	0.3625	1	1			1												0.16513	0.206412	0.412825	0.82565	1.23847	1.6513	2.06412	0.16513	0.16513	0.16513	0.16513	0.16513	0.16513	0	5.5	0	0	0	0	0.174741	0	0.961074	0	0	0	0	Cou gla
1	Col mop	T	2.1	1.95	1.5	0.8625	1	1	3			2											4.90781	1.16853	2.33705	4.6741	7.01115	9.3482	11.6853	1.16853	2.33705	4.6741	4.90781	4.90781	4.90781	38	0	18	0	0	0	7.91582	300.801	0	107.732	0	0	0	Col mop
1	Col mop	T	1.45	0.7	0.45	0.2875	3	3			1												0.125383	0.0901209	0.121635	0.132225	0.278537	0.807336	1.96539	0.0901209	0.121635	0.125383	0.125383	0.125383	0.125383	0	5.5	0	0	0	0	0.13268	0	0.729741	0	0	0	0	Col mop
1	Col mop	T	3	1.1	1.9	0.75	3	3	2			1											1.76538	0.743748	1.2423	1.69999	1.76538	1.83076	2.28845	0.743748	1.2423	1.69999	1.76538	1.76538	1.76538	18	0	5.5	0	0	0	2.1529	38.7522	0	10.2747	0	0	0	Col mop
1	Col mop	T	0.25	0.35	0.25	0.15	3	3			1												0.0058846	0.0117692	0.164769	2.0243	7.83828	19.8664	40.3683	0.0058846	0.0058846	0.0058846	0.0058846	0.0058846	0.0058846	0	5.5	0	0	0	0	0.00622709	0	0.034249	0	0	0	0	Col mop
1	Col mop	T	0.25	0.45	0.2	0.1625	3	3			1												0.00690623	0.0138125	0.193374	2.37574	9.19909	23.3154	47.3767	0.00690623	0.00690623	0.00690623	0.00690623	0.00690623	0.00690623	0	5.5	0	0	0	0	0.00730818	0	0.040195	0	0	0	0	Col mop
1	Col mop	T	0.75	0.45	0.22	0.1675	3	3			3												0.0220133	0.021198	0.0228286	0.123927	0.616372	1.81324	4.02762	0.021198	0.0220133	0.0220133	0.0220133	0.0220133	0.0220133	0	38	0	0	0	0	0.0355053	0	1.3492	0	0	0	0	Col mop
1	Col mop	T	0.4	0.3	0.4	0.175	3	3				2											0.0128153	0.0130156	0.0560671	0.832997	3.53223	9.3552	19.5033	0.0128153	0.0128153	0.0128153	0.0128153	0.0128153	0.0128153	0	0	18	0	0	0	0.0128153	0	0	0.281312	0	0	0	Col mop
1	Col mop	T	0.65	0.8	0.35	0.2875	1	1	2			2											0.168787	0.129836	0.259672	0.519345	0.779017	1.03869	1.29836	0.129836	0.168787	0.168787	0.168787	0.168787	0.168787	18	0	18	0	0	0	0.205838	3.70508	0	3.70508	0	0	0	Col mop
1	Col mop	T	0.4	0.7	1.02	0.43	1	1	2			2											0.232352	0.29044	0.58088	1.16176	1.74264	2.32352	2.9044	0.232352	0.232352	0.232352	0.232352	0.232352	0.232352	18	0	18	0	0	0	0.283356	5.10041	0	5.10041	0	0	0	Col mop
1	Col mop	T	0.6	0.5	0.2	0.175	3	3			2			1									0.019223	0.019134	0.0249187	0.263426	1.2495	3.5171	7.60021	0.019134	0.019223	0.019223	0.019223	0.019223	0.019223	0	18	0	5.5	0	0	0.0234427	0	0.421969	0	0.11188	0	0	Col mop
1	Col mop	T	0.45	0.4	0.45	0.2125	3	3			1												0.0212581	0.0212873	0.0600709	0.889983	3.88945	10.4582	21.9959	0.0212581	0.0212581	0.0212581	0.0212581	0.0212581	0.0212581	0	5.5	0	0	0	0	0.0224953	0	0.123724	0	0	0	0	Col mop
1	Col mop	T	0.35	0.65	0.5	0.2875	3	3			1												0.0302648	0.0326472	0.224118	3.20119	13.1665	34.3554	71.0032	0.0302648	0.0302648	0.0302648	0.0302648	0.0302648	0.0302648	0	5.5	0	0	0	0	0.0320262	0	0.176144	0	0	0	0	Col mop
1	Col mop	T	0.6	0.85	0.45	0.325	3	3			1												0.0662998	0.0659928	0.0859442	0.908553	4.30949	12.1304	26.213	0.0659928	0.0662998	0.0662998	0.0662998	0.0662998	0.0662998	0	5.5	0	0	0	0	0.0701585	0	0.385872	0	0	0	0	Col mop
1	Col mop	T	0.4	0.8	0.5	0.325	3	3			1												0.0441999	0.0448905	0.193374	2.87299	12.1826	32.2659	67.2667	0.0441999	0.0441999	0.0441999	0.0441999	0.0441999	0.0441999	0	5.5	0	0	0	0	0.0467723	0	0.257248	0	0	0	0	Col mop
1	Col mop	T	0.5	0.6	0.4	0.25	3	3															0.0326922	0.0326922	0.0653844	0.915382	4.11922	11.2461	23.8653	0.0326922	0.0326922	0.0326922	0.0326922	0.0326922	0.0326922	0	0	0	0	0	0	0.0326922	0	0	0	0	0	0	Col mop
1	Col mop	T	0.7	0.9	0.9	0.45	1	1			1												0.445321	0.318086	0.636173	1.27235	1.90852	2.54469	3.18086	0.318086	0.445321	0.445321	0.445321	0.445321	0.445321	0	5.5	0	0	0	0	0.471239	0	2.59181	0	0	0	0	Col mop
1	Col mop	T	0.3	0.6	0.65	0.3125	1	1			1			2									0.0920388	0.153398	0.306796	0.613592	0.920388	1.22718	1.53398	0.0920388	0.0920388	0.0920388	0.0920388	0.0920388	0.0920388	0	5.5	0	18	0	0	0.0973956	0	0.535676	0	2.02036	0	0	Col mop
1	Col mop	T	0.4	0.5	0.62	0.28	3	3	2		1												0.0328073	0.0333199	0.143532	2.13247	9.04251	23.9493	49.9286	0.0328073	0.0328073	0.0328073	0.0328073	0.0328073	0.0328073	18	5.5	0	0	0	0	0.0428853	0.771936	0.235869	0	0	0	0	Col mop
1	Col mop	T	0.5	0.65	0.55	0.3	3	3			1												0.0470768	0.0470768	0.0941535	1.31815	5.93167	16.1944	34.366	0.0470768	0.0470768	0.0470768	0.0470768	0.0470768	0.0470768	0	5.5	0	0	0	0	0.0498167	0	0.273992	0	0	0	0	Col mop
1	Col mop	T	0.85	0.7	1.4	0.525	1	1	2														0.736016	0.432951	0.865901	1.7318	2.5977	3.46361	4.32951	0.432951	0.736016	0.736016	0.736016	0.736016	0.736016	18	0	0	0	0	0	0.897581	16.1565	0	0	0	0	0	Col mop
1	Col mop	T	1.15	0.6	0.4	0.25	1	1	2														0.225802	0.0981748	0.19635	0.392699	0.589049	0.785398	0.981748	0.0981748	0.19635	0.225802	0.225802	0.225802	0.225802	18	0	0	0	0	0	0.275368	4.95663	0	0	0	0	0	Col mop
1	Col mop	T	0.8	0.7	0.85	0.3875	1	1	3														0.377384	0.235865	0.47173	0.94346	1.41519	1.88692	2.35865	0.235865	0.377384	0.377384	0.377384	0.377384	0.377384	38	0	0	0	0	0	0.608684	23.13	0	0	0	0	0	Col mop
1	Mae par	T	0.4	0.8	0.3	0.275	3	3			1												0.031646	0.0321405	0.138451	2.05699	8.72244	23.1016	48.1613	0.031646	0.031646	0.031646	0.031646	0.031646	0.031646	0	5.5	0	0	0	0	0.0334879	0	0.184183	0	0	0	0	Mae par
1	Col mop	T	0.65	0.65	0.7	0.3375	1	1	2														0.232601	0.178924	0.357847	0.715694	1.07354	1.43139	1.78924	0.178924	0.232601	0.232601	0.232601	0.232601	0.232601	18	0	0	0	0	0	0.283659	5.10587	0	0	0	0	0	Col mop
1	Col mop	T	0.75	0.7	0.75	0.3625	1	1			1												0.309619	0.206412	0.412825	0.82565	1.23847	1.6513	2.06412	0.206412	0.309619	0.309619	0.309619	0.309619	0.309619	0	5.5	0	0	0	0	0.327639	0	1.80201	0	0	0	0	Col mop
1	Col mop	T	0.9	0.58	0.4	0.245	3	3	2														0.0565157	0.0515541	0.0565932	0.159701	0.774474	2.36606	5.39961	0.0515541	0.0565157	0.0565157	0.0565157	0.0565157	0.0565157	18	0	0	0	0	0	0.0689215	1.24059	0	0	0	0	0	Col mop
1	Col mop	T	0.45	0.45	0.6	0.2625	3	3			1												0.0324388	0.0324833	0.0916653	1.35807	5.93511	15.9587	33.5646	0.0324388	0.0324388	0.0324388	0.0324388	0.0324388	0.0324388	0	5.5	0	0	0	0	0.0343268	0	0.188797	0	0	0	0	Col mop
1	Col mop	T	0.3	0.35	0.55	0.225	3	3	3			2											0.0158884	0.0205961	0.21773	2.90699	11.5985	29.8231	61.1115	0.0158884	0.0158884	0.0158884	0.0158884	0.0158884	0.0158884	38	0	18	0	0	0	0.0256265	0.973806	0	0.34877	0	0	0	Col mop
1	Col mop	T	0.45	0.25	0.25	0.125	1	1			1												0.0220893	0.0245437	0.0490874	0.0981748	0.147262	0.19635	0.245437	0.0220893	0.0220893	0.0220893	0.0220893	0.0220893	0.0220893	0	5.5	0	0	0	0	0.0233749	0	0.128562	0	0	0	0	Col mop
1	Col mop	T	0.4	0.65	0.44	0.2725	1	1			1												0.0933132	0.116641	0.233283	0.466566	0.699849	0.933132	1.16641	0.0933132	0.0933132	0.0933132	0.0933132	0.0933132	0.0933132	0	5.5	0	0	0	0	0.0987441	0	0.543092	0	0	0	0	Col mop
1	Col mop	T	0.9	0.53	0.5	0.2575	1	1	2														0.187477	0.104154	0.208307	0.416614	0.624922	0.833229	1.04154	0.104154	0.187477	0.187477	0.187477	0.187477	0.187477	18	0	0	0	0	0	0.22863	4.11534	0	0	0	0	0	Col mop
1	Col mop	T	0.6	0.7	0.7	0.35	1	1				2											0.230907	0.192423	0.384845	0.76969	1.15454	1.53938	1.92423	0.192423	0.230907	0.230907	0.230907	0.230907	0.230907	0	0	18	0	0	0	0.230907	0	0	5.06869	0	0	0	Col mop
1	Col mop	T	0.3	0.4	0.2	0.15	3	3				3											0.00706151	0.00915382	0.0967689	1.292	5.15491	13.2547	27.1607	0.00706151	0.00706151	0.00706151	0.00706151	0.00706151	0.00706151	0	0	38	0	0	0	0.00706151	0	0	0.432803	0	0	0	Col mop
1	Col mop	T	0.4	0.4	0.35	0.1875	3	3				3											0.0147115	0.0149414	0.0643628	0.956247	4.05485	10.7394	22.389	0.0147115	0.0147115	0.0147115	0.0147115	0.0147115	0.0147115	0	0	38	0	0	0	0.0147115	0	0	0.901672	0	0	0	Col mop
1	Col mop	T	0.45	0.4	0.2	0.15	3	3			1												0.0105923	0.0106068	0.0299315	0.443452	1.93799	5.21099	10.9599	0.0105923	0.0105923	0.0105923	0.0105923	0.0105923	0.0105923	0	5.5	0	0	0	0	0.0112088	0	0.0616481	0	0	0	0	Col mop
1	Col mop	T	0.25	0.8	0.3	0.275	3	3			1												0.0197788	0.0395576	0.553806	6.8039	26.3453	66.7732	135.682	0.0197788	0.0197788	0.0197788	0.0197788	0.0197788	0.0197788	0	5.5	0	0	0	0	0.0209299	0	0.115115	0	0	0	0	Col mop
1	Col mop	T	0.5	0.5	0.3	0.2	3	3			1												0.020923	0.020923	0.041846	0.585844	2.6363	7.19751	15.2738	0.020923	0.020923	0.020923	0.020923	0.020923	0.020923	0	5.5	0	0	0	0	0.0221407	0	0.121774	0	0	0	0	Col mop
1	Mae par	T	0.45	0.4	0.15	0.1375	3	3															0.00890045	0.00891266	0.0251508	0.372622	1.62845	4.37868	9.20934	0.00890045	0.00890045	0.00890045	0.00890045	0.00890045	0.00890045	0	0	0	0	0	0	0.00890045	0	0	0	0	0	0	Mae par
1	Col mop	T	0.3	0.7	0.58	0.32	3	3															0.0321377	0.04166	0.440406	5.88002	23.4605	60.3237	123.611	0.0321377	0.0321377	0.0321377	0.0321377	0.0321377	0.0321377	0	0	0	0	0	0	0.0321377	0	0	0	0	0	0	Col mop
1	Col mop	T	0.3	0.5	0.3	0.2	3	3			1												0.0125538	0.0162734	0.172034	2.29688	9.16428	23.564	48.2857	0.0125538	0.0125538	0.0125538	0.0125538	0.0125538	0.0125538	0	5.5	0	0	0	0	0.0132844	0	0.0730645	0	0	0	0	Col mop
1	Col mop	T	0.45	0.5	0.35	0.2125	1	1				2											0.0638381	0.0709313	0.141863	0.283725	0.425588	0.56745	0.709313	0.0638381	0.0638381	0.0638381	0.0638381	0.0638381	0.0638381	0	0	18	0	0	0	0.0638381	0	0	1.40133	0	0	0	Col mop
1	Col mop	T	0.85	1	0.4	0.35	3	3			2												0.10893	0.101325	0.109529	0.378696	1.87175	5.65294	12.7865	0.101325	0.10893	0.10893	0.10893	0.10893	0.10893	0	18	0	0	0	0	0.132842	0	2.39116	0	0	0	0	Col mop
1	Col mop	T	0.8	0.3	0.1	0.1	3	3	3														0.0083692	0.00792786	0.00849997	0.0366153	0.182422	0.543998	1.21942	0.00792786	0.0083692	0.0083692	0.0083692	0.0083692	0.0083692	38	0	0	0	0	0	0.0134987	0.512951	0	0	0	0	0	Col mop
1	Col mop	T	0.7	0.6	0.4	0.25	3	3				2											0.0457691	0.0447016	0.0493719	0.338931	1.6693	4.84111	10.655	0.0447016	0.0457691	0.0457691	0.0457691	0.0457691	0.0457691	0	0	18	0	0	0	0.0457691	0	0	1.00469	0	0	0	Col mop
1	Col mop	T	1.1	0.75	0.88	0.4075	3	3	3														0.191092	0.160081	0.190948	0.295754	1.17584	3.69262	8.70753	0.160081	0.190948	0.191092	0.191092	0.191092	0.191092	38	0	0	0	0	0	0.308213	11.7121	0	0	0	0	0	Col mop
1	Col mop	T	0.35	0.65	0.3	0.2375	3	3			1												0.0206533	0.0222791	0.152943	2.18455	8.98509	23.4448	48.454	0.0206533	0.0206533	0.0206533	0.0206533	0.0206533	0.0206533	0	5.5	0	0	0	0	0.0218553	0	0.120204	0	0	0	0	Col mop
1	Col mop	T	0.9	0.5	0.35	0.2125	2	2															0.0425162	0.00729016	0.0583213	0.46657	1.57467	3.73256	7.29016	0.00729016	0.0425162	0.0425162	0.0425162	0.0425162	0.0425162	0	0	0	0	0	0	0.0425162	0	0	0	0	0	0	Col mop
1	Col mop	T	1.25	0.65	0.4	0.2625	2	2				2											0.0901079	0.0057669	0.0461352	0.369082	1.24565	2.95265	5.7669	0.0057669	0.0461352	0.0901079	0.0901079	0.0901079	0.0901079	0	0	18	0	0	0	0.0901079	0	0	1.97798	0	0	0	Col mop
1	Col mop	T	0.6	0.45	0.45	0.225	3	3			1												0.0317768	0.0316297	0.0411922	0.43546	2.06549	5.81398	12.5636	0.0316297	0.0317768	0.0317768	0.0317768	0.0317768	0.0317768	0	5.5	0	0	0	0	0.0336263	0	0.184944	0	0	0	0	Col mop
1	Col mop	T	0.4	0.5	0.35	0.2125	1	1															0.056745	0.0709313	0.141863	0.283725	0.425588	0.56745	0.709313	0.056745	0.056745	0.056745	0.056745	0.056745	0.056745	0	0	0	0	0	0	0.056745	0	0	0	0	0	0	Col mop
1	Col mop	T	1.2	0.75	0.6	0.3375	2	2	1														0.142996	0.010344	0.0827521	0.662017	2.23431	5.29614	10.344	0.010344	0.0827521	0.142996	0.142996	0.142996	0.142996	5.5	0	0	0	0	0	0.151318	0.83225	0	0	0	0	0	Col mop
1	Col mop	T	0.6	0.3	0.42	0.18	2	2	1														0.0203372	0.0117692	0.0941535	0.753228	2.54215	6.02583	11.7692	0.0117692	0.0203372	0.0203372	0.0203372	0.0203372	0.0203372	5.5	0	0	0	0	0	0.0215208	0.118364	0	0	0	0	0	Col mop
1	Col mop	T	0.75	0.53	0.8	0.3325	1	1			1												0.260492	0.173661	0.347323	0.694645	1.04197	1.38929	1.73661	0.173661	0.260492	0.260492	0.260492	0.260492	0.260492	0	5.5	0	0	0	0	0.275653	0	1.51609	0	0	0	0	Col mop
1	Col mop	T	0.75	0.68	0.55	0.3075	3	3	2														0.07419	0.0714423	0.0769378	0.417662	2.07732	6.11106	13.574	0.0714423	0.07419	0.07419	0.07419	0.07419	0.07419	18	0	0	0	0	0	0.0904757	1.62856	0	0	0	0	0	Col mop
1	Col mop	T	0.65	0.55	0.35	0.225	3	3			1												0.0344249	0.0340018	0.0397994	0.342839	1.66123	4.74709	10.3525	0.0340018	0.0344249	0.0344249	0.0344249	0.0344249	0.0344249	0	5.5	0	0	0	0	0.0364284	0	0.200356	0	0	0	0	Col mop
1	Col mop	T	0.75	0.6	0.25	0.2125	1	1			1												0.106397	0.0709313	0.141863	0.283725	0.425588	0.56745	0.709313	0.0709313	0.106397	0.106397	0.106397	0.106397	0.106397	0	5.5	0	0	0	0	0.112589	0	0.619241	0	0	0	0	Col mop
1	Col mop	T	0.6	0.35	0.32	0.1675	3	3			2												0.0176106	0.0175291	0.0228286	0.241331	1.14469	3.22209	6.96272	0.0175291	0.0176106	0.0176106	0.0176106	0.0176106	0.0176106	0	18	0	0	0	0	0.0214764	0	0.386575	0	0	0	0	Col mop
1	Col mop	T	0.9	0.44	0.35	0.1975	3	3				2											0.0367258	0.0335016	0.0367761	0.103779	0.503279	1.53754	3.50885	0.0335016	0.0367258	0.0367258	0.0367258	0.0367258	0.0367258	0	0	18	0	0	0	0.0367258	0	0	0.806175	0	0	0	Col mop
1	Col mop	T	0.55	0.25	0.2	0.1125	3	3	3														0.00728219	0.00727672	0.0112707	0.14072	0.650965	1.80463	3.86432	0.00727672	0.00728219	0.00728219	0.00728219	0.00728219	0.00728219	38	0	0	0	0	0	0.0117455	0.446328	0	0	0	0	0	Col mop
1	Col mop	T	0.5	0.5	0.45	0.2375	3	3	2														0.0295047	0.0295047	0.0590094	0.826132	3.71759	10.1496	21.5384	0.0295047	0.0295047	0.0295047	0.0295047	0.0295047	0.0295047	18	0	0	0	0	0	0.0359814	0.647664	0	0	0	0	0	Col mop
1	Col mop	T	0.75	0.58	0.5	0.27	3	3			1												0.0571983	0.0550798	0.0593167	0.322005	1.60155	4.71144	10.4652	0.0550798	0.0571983	0.0571983	0.0571983	0.0571983	0.0571983	0	5.5	0	0	0	0	0.0605273	0	0.3329	0	0	0	0	Col mop
1	Col mop	T	0.4	0.27	0.25	0.13	1	1	3														0.0212372	0.0265465	0.0530929	0.106186	0.159279	0.212372	0.265465	0.0212372	0.0212372	0.0212372	0.0212372	0.0212372	0.0212372	38	0	0	0	0	0	0.0342535	1.30163	0	0	0	0	0	Col mop
1	Col mop	T	0.45	0.45	0.3	0.1875	3	3			1												0.0165504	0.0165731	0.046768	0.692893	3.02811	8.14217	17.1248	0.0165504	0.0165504	0.0165504	0.0165504	0.0165504	0.0165504	0	5.5	0	0	0	0	0.0175137	0	0.0963252	0	0	0	0	Col mop
2	Cou gla	T	1.1	1.8	1.6	0.85	3	3			1												0.831428	0.696501	0.830803	1.28681	5.116	16.0664	37.8859	0.696501	0.830803	0.831428	0.831428	0.831428	0.831428	0	5.5	0	0	0	0	0.879818	0	4.839	0	0	0	0	Cou gla
2	Cou gla	T	0.3	0.08	0.08	0.04	7	7															0.00144081	-0.0119499	-0.418902	-5.5011	-21.5051	-54.7078	-111.386	0.00144081	0.00144081	0.00144081	0.00144081	0.00144081	0.00144081	0	0	0	0	0	0	0.00144081	0	0	0	0	0	0	Cou gla
2	Cou gla	T	0.6	1.55	0.8	0.5875	3	3			1												0.216651	0.215648	0.280844	2.96892	14.0823	39.6391	85.6575	0.215648	0.216651	0.216651	0.216651	0.216651	0.216651	0	5.5	0	0	0	0	0.229261	0	1.26093	0	0	0	0	Cou gla
2	Cou gla	T	0.4	0.5	0.25	0.1875	3	3															0.0147115	0.0149414	0.0643628	0.956247	4.05485	10.7394	22.389	0.0147115	0.0147115	0.0147115	0.0147115	0.0147115	0.0147115	0	0	0	0	0	0	0.0147115	0	0	0	0	0	0	Cou gla
2	Cou gla	T	0.6	1.1	0.75	0.4625	3	3						1									0.134267	0.133645	0.17405	1.83995	8.72735	24.5659	53.0851	0.133645	0.134267	0.134267	0.134267	0.134267	0.134267	0	0	0	5.5	0	0	0.134267	0	0	0	0.781447	0	0	Cou gla
2	Cou gla	T	0.65	1.1	0.9	0.5	3	3						1									0.169999	0.16791	0.19654	1.69303	8.20361	23.4424	51.1236	0.16791	0.169999	0.169999	0.169999	0.169999	0.169999	0	0	0	5.5	0	0	0.169999	0	0	0	0.989415	0	0	Cou gla
2	Cou gla	T	0.75	0.35	0.3	0.1625	3	3															0.0207187	0.0199513	0.021486	0.116638	0.580123	1.70661	3.79075	0.0199513	0.0207187	0.0207187	0.0207187	0.0207187	0.0207187	0	0	0	0	0	0	0.0207187	0	0	0	0	0	0	Cou gla
2	Bos mos	T	1	1	1.1	0.525	1	1			2			1									0.865901	0.432951	0.865901	1.7318	2.5977	3.46361	4.32951	0.432951	0.865901	0.865901	0.865901	0.865901	0.865901	0	18	0	5.5	0	0	1.05598	0	19.0076	0	5.03964	0	0	Bos mos
2	Sec vir	T	1.2	1.3	1	0.575	3	3	2														0.41506	0.332673	0.413139	0.538041	1.81589	5.68786	13.5951	0.332673	0.413139	0.41506	0.41506	0.41506	0.41506	18	0	0	0	0	0	0.506171	9.11108	0	0	0	0	0	Sec vir
2	Sec vir	T	0.6	0.7	0.7	0.35	3	3			1												0.0768921	0.0765361	0.0996749	1.05371	4.99798	14.0684	30.4008	0.0765361	0.0768921	0.0768921	0.0768921	0.0768921	0.0768921	0	5.5	0	0	0	0	0.0813672	0	0.44752	0	0	0	0	Sec vir
2	Dic cin	T	0.4	0.7	0.4	0.275	1	1															0.0950332	0.118791	0.237583	0.475166	0.712749	0.950332	1.18791	0.0950332	0.0950332	0.0950332	0.0950332	0.0950332	0.0950332	0	0	0	0	0	0	0.0950332	0	0	0	0	0	0	Dic cin
2	Cou gla	T	1.4	1.8	1.9	0.925	1	1			1												3.76324	1.34401	2.68803	5.37605	8.06408	10.7521	13.4401	1.34401	2.68803	3.76324	3.76324	3.76324	3.76324	0	5.5	0	0	0	0	3.98226	0	21.9024	0	0	0	0	Cou gla
[truncated: 34 more columns]

## Sheet: Site7
Date:	21/8/2014									Total	T	C	%C		Total	T	C	%C
Site No. :	GNP10								Col mop	18	4	14	77.7778	Col mop	18	4	14	77.7778
			Trans 1 for Col Mop						Trans 2 for non Col mop shrubs					ALL SPECIES 1	20	6	14	70
			Width (m)	Length (m)	Area (ha)				Width (m)	Length (m)	Area (ha)			Shrub density (no/ha) 1	800
	Transect Dimensions:		10	25	0.025				25	50	0.125			ALL SPECIES 2	42	42	0	0
														Shrub density (no/ha) 2	336
	Co-ordinates:			X	Y					X	Y			TOTAL Shrub density (no/ha)	1136
			NW Corner						NW Corner
			SW Corner						SW Corner
			NE Corner						NE Corner
			SE Corner						SE Corner
									OED		OUD	NED		NUD	NFD	OFD	OBE	OBU	NBE	NBU	RE	Notes	Canopy volume (m3)																				Damage
Trans. No.	Sp. Code	Coppice	Height (m)	D1 (m)	D2 (m)	R	Shape	Adj. shape	Score	Eaten		Score	Eaten										Total	0.5	1	2	3	4	5	0.5	1	2	3	4	5	OED	OUD	NED	NUD	NFD	OFD	Old Rec. Vol.	OED	OUD	NED	NUD	NFD	OFD	Sp. Code
1	Col mop	C	2.1	2	2.28	1.07	1	1	2			1											7.5533	1.7984	3.59681	7.19362	10.7904	14.3872	17.984	1.7984	3.59681	7.19362	7.5533	7.5533	7.5533	18	0	5.5	0	0	0	9.21134	165.804	0	43.961	0	0	0	Col mop
1	Col mop	C	1.6	1.47	1.5	0.7425	1	1	4														2.77117	0.86599	1.73198	3.46396	5.19594	6.92792	8.6599	0.86599	1.73198	2.77117	2.77117	2.77117	2.77117	63	0	0	0	0	0	7.48964	471.847	0	0	0	0	0	Col mop
1	Col mop	C	1.7	1.5	1.65	0.7875	1	1	3			1											3.31207	0.974139	1.94828	3.89656	5.84483	7.79311	9.74139	0.974139	1.94828	3.31207	3.31207	3.31207	3.31207	38	0	5.5	0	0	0	5.34205	202.998	0	19.2766	0	0	0	Col mop
1	Col mop	C	2.8	2.3	2.71	1.2525	1	1	2			1											13.7995	2.4642	4.92839	9.85679	14.7852	19.7136	24.642	2.4642	4.92839	9.85679	13.7995	13.7995	13.7995	18	0	5.5	0	0	0	16.8287	302.916	0	80.3146	0	0	0	Col mop
1	Col mop	C	2.6	1.67	2.05	0.93	1	1	3			1											7.06463	1.35858	2.71716	5.43433	8.15149	10.8687	13.5858	1.35858	2.71716	5.43433	7.06463	7.06463	7.06463	38	0	5.5	0	0	0	11.3946	432.993	0	41.1169	0	0	0	Col mop
1	Col mop	C	2.9	1.75	1.75	0.875	1	1	2														6.97532	1.20264	2.40528	4.81056	7.21585	9.62113	12.0264	1.20264	2.40528	4.81056	6.97532	6.97532	6.97532	18	0	0	0	0	0	8.50648	153.117	0	0	0	0	0	Col mop
1	Thy afr	T	3.3	4.45	2.68	1.7825	1	1	1														32.9399	4.9909	9.9818	19.9636	29.9454	39.9272	49.909	4.9909	9.9818	19.9636	29.9454	32.9399	32.9399	5.5	0	0	0	0	0	34.8571	191.714	0	0	0	0	0	Thy afr
1	Col mop	C	2.8	1.73	1.87	0.9	1	1	3			1											7.12513	1.27235	2.54469	5.08938	7.63407	10.1788	12.7235	1.27235	2.54469	5.08938	7.12513	7.12513	7.12513	38	0	5.5	0	0	0	11.4921	436.702	0	41.469	0	0	0	Col mop
1	Col mop	C	1.7	1.5	1.87	0.8425	1	1	4			2											3.79087	1.11496	2.22992	4.45984	6.68977	8.91969	11.1496	1.11496	2.22992	3.79087	3.79087	3.79087	3.79087	63	0	18	0	0	0	10.2456	645.472	0	83.2142	0	0	0	Col mop
1	Col mop	C	3	3.3	3.92	1.805	1	1	3			2											30.7062	5.11769	10.2354	20.4708	30.7062	40.9415	51.1769	5.11769	10.2354	20.4708	30.7062	30.7062	30.7062	38	0	18	0	0	0	49.5261	1881.99	0	674.038	0	0	0	Col mop
1	Col mop	C	2.9	1.5	1.37	0.7175	1	1	2			1											4.6902	0.808656	1.61731	3.23462	4.85193	6.46925	8.08656	0.808656	1.61731	3.23462	4.6902	4.6902	4.6902	18	0	5.5	0	0	0	5.71976	102.956	0	27.2975	0	0	0	Col mop
1	Mae par	T	0.55	0.28	0.28	0.14	3	3			1												0.0112775	0.011269	0.0174543	0.217924	1.00811	2.79472	5.98445	0.011269	0.0112775	0.0112775	0.0112775	0.0112775	0.0112775	0	5.5	0	0	0	0	0.0119339	0	0.0656362	0	0	0	0	Mae par
1	Col mop	C	3	2.8	2.8	1.4	1	1	2														18.4726	3.07876	6.15752	12.315	18.4726	24.6301	30.7876	3.07876	6.15752	12.315	18.4726	18.4726	18.4726	18	0	0	0	0	0	22.5275	405.495	0	0	0	0	0	Col mop
1	Col mop	T	1.9	1.2	1.23	0.6075	3	3	4														0.733568	0.440098	0.655602	0.733675	0.875918	1.72403	3.91971	0.440098	0.655602	0.733568	0.733568	0.733568	0.733568	63	0	0	0	0	0	1.98262	124.905	0	0	0	0	0	Col mop
1	Col mop	T	2.7	1.4	2.15	0.8875	3	3	3			2											2.22482	1.02125	1.66949	2.18605	2.22787	2.47315	3.60008	1.02125	1.66949	2.18605	2.22482	2.22482	2.22482	38	0	18	0	0	0	3.58842	136.36	0	48.8375	0	0	0	Col mop
1	Col mop	C	3	2.08	1.5	0.895	1	1	2			1											7.54948	1.25825	2.51649	5.03299	7.54948	10.066	12.5825	1.25825	2.51649	5.03299	7.54948	7.54948	7.54948	18	0	5.5	0	0	0	9.20669	165.72	0	43.9388	0	0	0	Col mop
1	Col mop	C	3	3.9	3.02	1.73	1	1	3			2											28.2074	4.70124	9.40247	18.8049	28.2074	37.6099	47.0124	4.70124	9.40247	18.8049	28.2074	28.2074	28.2074	38	0	18	0	0	0	45.4958	1728.84	0	619.187	0	0	0	Col mop
1	Col mop	C	3.4	3.3	3.6	1.725	1	1	2			1											31.7839	4.6741	9.3482	18.6964	28.0446	37.3928	46.741	4.6741	9.3482	18.6964	28.0446	31.7839	31.7839	18	0	5.5	0	0	0	38.7608	697.695	0	184.986	0	0	0	Col mop
1	Col mop	T	0.25	0.35	0.44	0.1975	1	1			1												0.0306354	0.0612709	0.122542	0.245083	0.367625	0.490167	0.612709	0.0306354	0.0306354	0.0306354	0.0306354	0.0306354	0.0306354	0	5.5	0	0	0	0	0.0324185	0	0.178301	0	0	0	0	Col mop
1	Col mop	T	3.2	2.9	2.78	1.42	1	1	2			1											20.2711	3.16735	6.33471	12.6694	19.0041	25.3388	31.6735	3.16735	6.33471	12.6694	19.0041	20.2711	20.2711	18	0	5.5	0	0	0	24.7208	444.975	0	117.98	0	0	0	Col mop
2	Thy afr	T	2.2	3.3	3.6	1.725	1	1	2														20.566	4.6741	9.3482	18.6964	28.0446	37.3928	46.741	4.6741	9.3482	18.6964	20.566	20.566	20.566	18	0	0	0	0	0	25.0805	451.45	0	0	0	0	0	Thy afr
2	Sal ang	T	1.2	2.7	1.88	1.145	1	1	4														4.94245	2.05935	4.11871	8.23741	12.3561	16.4748	20.5935	2.05935	4.11871	4.94245	4.94245	4.94245	4.94245	63	0	0	0	0	0	13.358	841.552	0	0	0	0	0	Sal ang
2	Bos mos	T	0.35	0.38	0.25	0.1575	1	1			1												0.0272759	0.0389656	0.0779311	0.155862	0.233793	0.311725	0.389656	0.0272759	0.0272759	0.0272759	0.0272759	0.0272759	0.0272759	0	5.5	0	0	0	0	0.0288634	0	0.158749	0	0	0	0	Bos mos
2	Cap tom	T	2.3	2.8	2.68	1.37	1	1			1												13.5618	2.94823	5.89646	11.7929	17.6894	23.5858	29.4823	2.94823	5.89646	11.7929	13.5618	13.5618	13.5618	0	5.5	0	0	0	0	14.3512	0	78.9314	0	0	0	0	Cap tom
2	Thy afr	T	2.8	2.4	3.1	1.375	3	3	1		1												5.53806	2.46856	4.06676	5.40889	5.54008	5.974	8.22434	2.46856	4.06676	5.40889	5.53806	5.53806	5.53806	5.5	5.5	0	0	0	0	6.22254	34.224	34.224	0	0	0	0	Thy afr
2	Sec vir	T	1.65	1.73	1.5	0.8075	3	3			1			1									1.12555	0.744476	1.05674	1.13629	1.74202	4.37728	10.5454	0.744476	1.05674	1.12555	1.12555	1.12555	1.12555	0	5.5	0	5.5	0	0	1.19105	0	6.55079	0	6.55079	0	0	Sec vir
2	Thy afr	T	0.7	0.35	0.3	0.1625	3	3			1												0.0193374	0.0188864	0.0208596	0.143199	0.705281	2.04537	4.50173	0.0188864	0.0193374	0.0193374	0.0193374	0.0193374	0.0193374	0	5.5	0	0	0	0	0.0204629	0	0.112546	0	0	0	0	Thy afr
2	Com afr	T	1.5	1.26	1.5	0.69	1	1			1												2.24357	0.747856	1.49571	2.99142	4.48714	5.98285	7.47856	0.747856	1.49571	2.24357	2.24357	2.24357	2.24357	0	5.5	0	0	0	0	2.37415	0	13.0578	0	0	0	0	Com afr
2	Sal per	T	0.2	0.2	0.12	0.08	1	1			4												0.00402124	0.0100531	0.0201062	0.0402124	0.0603186	0.0804248	0.100531	0.00402124	0.00402124	0.00402124	0.00402124	0.00402124	0.00402124	0	63	0	0	0	0	0.0108682	0	0.684697	0	0	0	0	Sal per
2	Sal per	T	0.4	0.85	0.55	0.35	1	1			4												0.153938	0.192423	0.384845	0.76969	1.15454	1.53938	1.92423	0.153938	0.153938	0.153938	0.153938	0.153938	0.153938	0	63	0	0	0	0	0.416049	0	26.2111	0	0	0	0	Sal per
2	Sal per	T	0.2	0.25	0.18	0.1075	1	1			4												0.00726101	0.0181525	0.036305	0.0726101	0.108915	0.14522	0.181525	0.00726101	0.00726101	0.00726101	0.00726101	0.00726101	0.00726101	0	63	0	0	0	0	0.0196243	0	1.23633	0	0	0	0	Sal per
2	Sal per	T	0.15	0.37	0.28	0.1625	2	2			3												0.00414374	0.153472	1.22777	9.82219	33.1499	78.5775	153.472	0.00414374	0.00414374	0.00414374	0.00414374	0.00414374	0.00414374	0	38	0	0	0	0	0.00668345	0	0.253971	0	0	0	0	Sal per
2	Thy afr	T	1.6	2.28	2.6	1.22	3	3			1												2.49134	1.68178	2.35996	2.53027	4.16035	10.8996	26.3975	1.68178	2.35996	2.49134	2.49134	2.49134	2.49134	0	5.5	0	0	0	0	2.63634	0	14.4999	0	0	0	0	Thy afr
2	Sal per	T	0.15	0.35	0.5	0.2125	1	1			4												0.0212794	0.0709313	0.141863	0.283725	0.425588	0.56745	0.709313	0.0212794	0.0212794	0.0212794	0.0212794	0.0212794	0.0212794	0	63	0	0	0	0	0.0575118	0	3.62325	0	0	0	0	Sal per
2	Sal per	T	0.5	0.5	0.65	0.2875	1	1			2												0.129836	0.129836	0.259672	0.519345	0.779017	1.03869	1.29836	0.129836	0.129836	0.129836	0.129836	0.129836	0.129836	0	18	0	0	0	0	0.158337	0	2.85006	0	0	0	0	Sal per
2	Bos mos	T	0.8	0.65	0.8	0.3625	1	1			1												0.33026	0.206412	0.412825	0.82565	1.23847	1.6513	2.06412	0.206412	0.33026	0.33026	0.33026	0.33026	0.33026	0	5.5	0	0	0	0	0.349481	0	1.92215	0	0	0	0	Bos mos
2	Bos mos	T	0.55	0.9	0.75	0.4125	1	1			1												0.294009	0.267281	0.534562	1.06912	1.60368	2.13825	2.67281	0.267281	0.294009	0.294009	0.294009	0.294009	0.294009	0	5.5	0	0	0	0	0.311121	0	1.71116	0	0	0	0	Bos mos
2	Thy afr	T	2.6	4.1	3.6	1.925	3	3			1												10.0793	4.76838	7.73034	9.9554	10.116	11.6529	18.0069	4.76838	7.73034	9.9554	10.0793	10.0793	10.0793	0	5.5	0	0	0	0	10.6659	0	58.6624	0	0	0	0	Thy afr
2	Thy afr	T	3.5	2.9	2.2	1.275	3	3	2														5.95227	2.2039	3.78307	5.48372	5.93492	5.96962	6.42081	2.2039	3.78307	5.48372	5.93492	5.95227	5.95227	18	0	0	0	0	0	7.25886	130.66	0	0	0	0	0	Thy afr
2	Bos mos	T	0.6	0.7	0.85	0.3875	1	1			1												0.283038	0.235865	0.47173	0.94346	1.41519	1.88692	2.35865	0.235865	0.283038	0.283038	0.283038	0.283038	0.283038	0	5.5	0	0	0	0	0.299511	0	1.64731	0	0	0	0	Bos mos
2	Thy afr	T	2	2	1.7	0.925	3	3	2			1											1.79022	1.03497	1.56645	1.79022	2.014	3.58045	7.83223	1.03497	1.56645	1.79022	1.79022	1.79022	1.79022	18	0	5.5	0	0	0	2.1832	39.2976	0	10.4193	0	0	0	Thy afr
2	Thy afr	T	2.7	3.1	2.7	1.45	3	3	2														5.93873	2.72603	4.45639	5.83524	5.94688	6.60161	9.60975	2.72603	4.45639	5.83524	5.93873	5.93873	5.93873	18	0	0	0	0	0	7.24236	130.362	0	0	0	0	0	Thy afr
2	Thy afr	T	2.5	1.9	1.55	0.8625	3	3	1														1.94559	0.94945	1.52535	1.93003	1.96116	2.36584	3.89119	0.94945	1.52535	1.93003	1.94559	1.94559	1.94559	5.5	0	0	0	0	0	2.05883	11.3236	0	0	0	0	0	Thy afr
2	Sec vir	T	1.8	2.4	2.37	1.1925	3	3	2			1											2.67783	1.66905	2.44274	2.68151	3.47126	7.56699	17.7237	1.66905	2.44274	2.67783	2.67783	2.67783	2.67783	18	0	5.5	0	0	0	3.26565	58.7817	0	15.5853	0	0	0	Sec vir
2	Sal ang	T	0.4	2.38	1.6	0.995	1	1	4														1.2441	1.55513	3.11026	6.22051	9.33077	12.441	15.5513	1.2441	1.2441	1.2441	1.2441	1.2441	1.2441	63	0	0	0	0	0	3.36244	211.834	0	0	0	0	0	Sal ang
2	Sal ang	T	0.4	1.76	1.5	0.815	1	1	4														0.83469	1.04336	2.08672	4.17345	6.26017	8.3469	10.4336	0.83469	0.83469	0.83469	0.83469	0.83469	0.83469	63	0	0	0	0	0	2.25592	142.123	0	0	0	0	0	Sal ang
2	Sal ang	T	0.25	0.6	0.65	0.3125	1	1	4														0.076699	0.153398	0.306796	0.613592	0.920388	1.22718	1.53398	0.076699	0.076699	0.076699	0.076699	0.076699	0.076699	63	0	0	0	0	0	0.207295	13.0596	0	0	0	0	0	Sal ang
2	Sal ang	T	0.5	0.8	0.65	0.3625	1	1	4														0.206412	0.206412	0.412825	0.82565	1.23847	1.6513	2.06412	0.206412	0.206412	0.206412	0.206412	0.206412	0.206412	63	0	0	0	0	0	0.557871	35.1459	0	0	0	0	0	Sal ang
2	Cap tom	T	0.55	0.3	0.35	0.1625	1	1			3												0.0456267	0.0414788	0.0829577	0.165915	0.248873	0.331831	0.414788	0.0414788	0.0456267	0.0456267	0.0456267	0.0456267	0.0456267	0	38	0	0	0	0	0.0735915	0	2.79648	0	0	0	0	Cap tom
2	Mae par	T	0.2	0.04	0.04	0.02	7	7			1												0.000242933	-0.0336523	-0.575558	-6.30428	-23.457	-58.3105	-117.142	0.000242933	0.000242933	0.000242933	0.000242933	0.000242933	0.000242933	0	5.5	0	0	0	0	0.000257072	0	0.0014139	0	0	0	0	Mae par
2	Sal per	T	0.15	0.1	0.1	0.05	3	3			4												0.000392306	0.00537605	0.0717775	0.736374	2.69122	6.63376	13.2614	0.000392306	0.000392306	0.000392306	0.000392306	0.000392306	0.000392306	0	63	0	0	0	0	0.00106029	0	0.0667981	0	0	0	0	Sal per
2	Sal per	T	0.25	0.4	0.2	0.15	2	2			4												0.0058846	0.0470768	0.376614	3.01291	10.1686	24.1033	47.0768	0.0058846	0.0058846	0.0058846	0.0058846	0.0058846	0.0058846	0	63	0	0	0	0	0.0159043	0	1.00197	0	0	0	0	Sal per
2	Sal per	T	0.3	0.5	0.4	0.225	1	1			2												0.0477129	0.0795216	0.159043	0.318086	0.477129	0.636173	0.795216	0.0477129	0.0477129	0.0477129	0.0477129	0.0477129	0.0477129	0	18	0	0	0	0	0.0581865	0	1.04736	0	0	0	0	Sal per
2	Sal per	T	0.15	0.4	0.2	0.15	1	1			1												0.0106029	0.0353429	0.0706858	0.141372	0.212058	0.282743	0.353429	0.0106029	0.0106029	0.0106029	0.0106029	0.0106029	0.0106029	0	5.5	0	0	0	0	0.01122	0	0.0617099	0	0	0	0	Sal per
2	Sal per	T	0.35	0.35	0.2	0.1375	3	3			4												0.00692257	0.0074675	0.0512634	0.732219	3.01162	7.85823	16.2408	0.00692257	0.00692257	0.00692257	0.00692257	0.00692257	0.00692257	0	63	0	0	0	0	0.0187097	0	1.17871	0	0	0	0	Sal per
2	Sal per	T	0.1	0.12	0.15	0.0675	1	1															0.00143139	0.00715694	0.0143139	0.0286278	0.0429416	0.0572555	0.0715694	0.00143139	0.00143139	0.00143139	0.00143139	0.00143139	0.00143139	0	0	0	0	0	0	0.00143139	0	0	0	0	0	0	Sal per
2	Sal per	T	0.3	0.9	0.8	0.425	1	1			1												0.170235	0.283725	0.56745	1.1349	1.70235	2.2698	2.83725	0.170235	0.170235	0.170235	0.170235	0.170235	0.170235	0	5.5	0	0	0	0	0.180143	0	0.990786	0	0	0	0	Sal per
2	Thy afr	T	1.8	1.9	1.9	0.95	3	3			1												1.69947	1.05926	1.55027	1.7018	2.20302	4.80235	11.2482	1.05926	1.55027	1.69947	1.69947	1.69947	1.69947	0	5.5	0	0	0	0	1.79838	0	9.8911	0	0	0	0	Thy afr
2	Sal per	T	0.2	0.32	0.33	0.1625	1	1			3												0.0165915	0.0414788	0.0829577	0.165915	0.248873	0.331831	0.414788	0.0165915	0.0165915	0.0165915	0.0165915	0.0165915	0.0165915	0	38	0	0	0	0	0.0267605	0	1.0169	0	0	0	0	Sal per
2	Mae par	T	0.1	0.22	0.18	0.1	1	1			3												0.00314159	0.015708	0.0314159	0.0628319	0.0942478	0.125664	0.15708	0.00314159	0.00314159	0.00314159	0.00314159	0.00314159	0.00314159	0	38	0	0	0	0	0.00506708	0	0.192549	0	0	0	0	Mae par
2	Sal per	T	0.25	0.25	0.25	0.125	3	3			1												0.00408652	0.00817305	0.114423	1.40576	5.44325	13.7961	28.0336	0.00408652	0.00408652	0.00408652	0.00408652	0.00408652	0.00408652	0	5.5	0	0	0	0	0.00432436	0	0.023784	0	0	0	0	Sal per
2	Sal per	T	0.25	0.37	0.18	0.1375	1	1			4												0.0148489	0.0296979	0.0593957	0.118791	0.178187	0.237583	0.296979	0.0148489	0.0148489	0.0148489	0.0148489	0.0148489	0.0148489	0	63	0	0	0	0	0.0401323	0	2.52833	0	0	0	0	Sal per
[truncated: 34 more columns]
