# Supplementary material for: Emergent trees in Colophospermum mopane woodland: influence of elephant density on persistence versus attrition
Source: PeerJ. 2024 Feb 26;12:e16961. doi: 10.7717/peerj.16961 (PMC10903334; doi:10.7717/peerj.16961)
Supplement: Data S6 — This data is used in conjunction with the tree and shrub data for Malilangwe in 2001 and 2014, and the shrub data for Gonarezhou in 2014, for the production of Figures 2 and 4. [file peerj-12-16961-s009.xlsx]

## Sheet: Site1
Date:	22/8/2014														Tree density ≤ 10m (no/ha)	280
Trans. No.:	GNP2														Tree density > 10m (no/ha)	16
			Transect 1									Transect 2 for Tall Trees (GPS coordinates)			Tree height (m)	4.8973
			Width (m)	Length (m)	Area (ha)							Initial	Extension	Total area (ha)	Lower level of canopy (m)	#REF!
	Transect Dimensions:		25	50	0.125							1407.17	4786.26	0.619343
	Co-ordinates:			X	Y								X	Y
			NW Corner									NW Corner
			SW Corner									SW Corner
			NE Corner									NE Corner
			SE Corner									SE Corner
			Max
			1.9	18.3								OED				OUD	DRT	NED				NUD	NFD	OFD	OBE	OBU	NBE	NBU	RE	Canopy volume (m3) up to specified height class	Height classes (m)
Trans. No.	Tree	Sp. Code	Stem Circum.(cm)	Height (m)	D1 (m)	D2 (m)	CD (m)	R	Y	Shape	Adj. Shape	F	C	S	Tree			F	C	S	E									Total	0.5	1	2	3	4	5	6	11	14	17	24	0.5	1	2	3	4	5	6	11
1	1	Col mop	1.05	4.7	5.7	3.9	4.7	2.4	0	1	1	2	1	5	1			1	0	2					0	0	0	0	Col mop	85.0492	9.04779	18.0956	36.1911	54.2867	72.3823	90.4779	108.573	199.051	253.338	307.625	434.294	9.04779	18.0956	36.1911	54.2867	72.3823	85.0492	85.0492	85.0492
1			0.8					0	0		#DIV/0!	2	1	3	0			1	0	2					0	0	0	0	Col mop	#DIV/0!	#DIV/0!	#DIV/0!	#DIV/0!	#DIV/0!	#DIV/0!	#DIV/0!	#DIV/0!	#DIV/0!	#DIV/0!	#DIV/0!	#DIV/0!	#DIV/0!	#DIV/0!	#DIV/0!	#DIV/0!	#DIV/0!	#DIV/0!	#DIV/0!	#DIV/0!
1			0.6					0	0		#DIV/0!	2	1	5	0			1	0	2					0	0	0	0	Col mop	#DIV/0!	#DIV/0!	#DIV/0!	#DIV/0!	#DIV/0!	#DIV/0!	#DIV/0!	#DIV/0!	#DIV/0!	#DIV/0!	#DIV/0!	#DIV/0!	#DIV/0!	#DIV/0!	#DIV/0!	#DIV/0!	#DIV/0!	#DIV/0!	#DIV/0!	#DIV/0!
1	1	Col mop	0.83	4.5	3.6	2.4	4	1.5	0.5	1	1	1	1	5	1			1	0	2					0	0	0	0	Col mop	28.2743	0	3.53429	10.6029	17.6715	24.74	31.8086	38.8772	74.2201	95.4259	116.632	166.112	0	3.53429	10.6029	17.6715	24.74	28.2743	28.2743	28.2743
1	1	Col mop	0.85	3.3	2.6	4.05	3.3	1.6625	0	1	1	2	1	3	1			1	0	1					0	0	0	0	Col mop	28.6541	4.34153	8.68307	17.3661	26.0492	34.7323	43.4153	52.0984	95.5137	121.563	147.612	208.394	4.34153	8.68307	17.3661	26.0492	28.6541	28.6541	28.6541	28.6541
1	1	Col mop	0.3	4	2.1	2.9	4	1.25	0	1	1	1	1	3	1			1	0	1					0	0	0	0	Col mop	19.635	2.45437	4.90874	9.81748	14.7262	19.635	24.5437	29.4524	53.9961	68.7223	83.4486	117.81	2.45437	4.90874	9.81748	14.7262	19.635	19.635	19.635	19.635
1			0.25					0	0		#DIV/0!	2	1	4	0										0	0	0	0	Col mop	#DIV/0!	#DIV/0!	#DIV/0!	#DIV/0!	#DIV/0!	#DIV/0!	#DIV/0!	#DIV/0!	#DIV/0!	#DIV/0!	#DIV/0!	#DIV/0!	#DIV/0!	#DIV/0!	#DIV/0!	#DIV/0!	#DIV/0!	#DIV/0!	#DIV/0!	#DIV/0!
1			0.32					0	0		#DIV/0!	1	1	3	0			1	0	1					0	0	0	0	Col mop	#DIV/0!	#DIV/0!	#DIV/0!	#DIV/0!	#DIV/0!	#DIV/0!	#DIV/0!	#DIV/0!	#DIV/0!	#DIV/0!	#DIV/0!	#DIV/0!	#DIV/0!	#DIV/0!	#DIV/0!	#DIV/0!	#DIV/0!	#DIV/0!	#DIV/0!	#DIV/0!
1			0.33					0	0		#DIV/0!	2	1	5	0										0	0	0	0	Col mop	#DIV/0!	#DIV/0!	#DIV/0!	#DIV/0!	#DIV/0!	#DIV/0!	#DIV/0!	#DIV/0!	#DIV/0!	#DIV/0!	#DIV/0!	#DIV/0!	#DIV/0!	#DIV/0!	#DIV/0!	#DIV/0!	#DIV/0!	#DIV/0!	#DIV/0!	#DIV/0!
1	1	Col mop	0.56	5	5.2	5	5	2.55	0	1	1	1	1	3	1			1	0	1					0	0	18	0	Col mop	102.141	10.2141	20.4282	40.8564	61.2846	81.7128	102.141	122.569	224.71	285.995	347.28	490.277	10.2141	20.4282	40.8564	61.2846	81.7128	102.141	102.141	102.141
1			0.35					0	0		#DIV/0!	1	1	2	0										0	0	0	0	Col mop	#DIV/0!	#DIV/0!	#DIV/0!	#DIV/0!	#DIV/0!	#DIV/0!	#DIV/0!	#DIV/0!	#DIV/0!	#DIV/0!	#DIV/0!	#DIV/0!	#DIV/0!	#DIV/0!	#DIV/0!	#DIV/0!	#DIV/0!	#DIV/0!	#DIV/0!	#DIV/0!
1			0.5					0	0		#DIV/0!	1	0	1	0										0	0	0	0	Col mop	#DIV/0!	#DIV/0!	#DIV/0!	#DIV/0!	#DIV/0!	#DIV/0!	#DIV/0!	#DIV/0!	#DIV/0!	#DIV/0!	#DIV/0!	#DIV/0!	#DIV/0!	#DIV/0!	#DIV/0!	#DIV/0!	#DIV/0!	#DIV/0!	#DIV/0!	#DIV/0!
1			0.28					0	0		#DIV/0!	1	0	2	0										0	0	0	0	Col mop	#DIV/0!	#DIV/0!	#DIV/0!	#DIV/0!	#DIV/0!	#DIV/0!	#DIV/0!	#DIV/0!	#DIV/0!	#DIV/0!	#DIV/0!	#DIV/0!	#DIV/0!	#DIV/0!	#DIV/0!	#DIV/0!	#DIV/0!	#DIV/0!	#DIV/0!	#DIV/0!
1			0.38					0	0		#DIV/0!	1	0	2	0										0	0	0	0	Col mop	#DIV/0!	#DIV/0!	#DIV/0!	#DIV/0!	#DIV/0!	#DIV/0!	#DIV/0!	#DIV/0!	#DIV/0!	#DIV/0!	#DIV/0!	#DIV/0!	#DIV/0!	#DIV/0!	#DIV/0!	#DIV/0!	#DIV/0!	#DIV/0!	#DIV/0!	#DIV/0!
1			0.17					0	0		#DIV/0!	1	0	2	0										0	0	0	0	Col mop	#DIV/0!	#DIV/0!	#DIV/0!	#DIV/0!	#DIV/0!	#DIV/0!	#DIV/0!	#DIV/0!	#DIV/0!	#DIV/0!	#DIV/0!	#DIV/0!	#DIV/0!	#DIV/0!	#DIV/0!	#DIV/0!	#DIV/0!	#DIV/0!	#DIV/0!	#DIV/0!
1			0.17					0	0		#DIV/0!	1	1	2	0			1	0	1					0	0	0	0	Col mop	#DIV/0!	#DIV/0!	#DIV/0!	#DIV/0!	#DIV/0!	#DIV/0!	#DIV/0!	#DIV/0!	#DIV/0!	#DIV/0!	#DIV/0!	#DIV/0!	#DIV/0!	#DIV/0!	#DIV/0!	#DIV/0!	#DIV/0!	#DIV/0!	#DIV/0!	#DIV/0!
1	1	Col mop	0.4	4.5	6.45	4.25	4.5	2.675	0	1	1	2	1	3	1			1	0	1					0	0	0	0	Col mop	101.16	11.24	22.4801	44.9601	67.4402	89.9202	112.4	134.88	247.281	314.721	382.161	539.521	11.24	22.4801	44.9601	67.4402	89.9202	101.16	101.16	101.16
1			0.62					0	0		#DIV/0!	1	1	2	0			1	0	1					0	0	0	0	Col mop	#DIV/0!	#DIV/0!	#DIV/0!	#DIV/0!	#DIV/0!	#DIV/0!	#DIV/0!	#DIV/0!	#DIV/0!	#DIV/0!	#DIV/0!	#DIV/0!	#DIV/0!	#DIV/0!	#DIV/0!	#DIV/0!	#DIV/0!	#DIV/0!	#DIV/0!	#DIV/0!
1			0.65					0	0		#DIV/0!	2	1	2	0			1	0	1					0	0	0	0	Col mop	#DIV/0!	#DIV/0!	#DIV/0!	#DIV/0!	#DIV/0!	#DIV/0!	#DIV/0!	#DIV/0!	#DIV/0!	#DIV/0!	#DIV/0!	#DIV/0!	#DIV/0!	#DIV/0!	#DIV/0!	#DIV/0!	#DIV/0!	#DIV/0!	#DIV/0!	#DIV/0!
1			0.45					0	0		#DIV/0!	1	1	3	0			1	0	1					0	0	0	0	Col mop	#DIV/0!	#DIV/0!	#DIV/0!	#DIV/0!	#DIV/0!	#DIV/0!	#DIV/0!	#DIV/0!	#DIV/0!	#DIV/0!	#DIV/0!	#DIV/0!	#DIV/0!	#DIV/0!	#DIV/0!	#DIV/0!	#DIV/0!	#DIV/0!	#DIV/0!	#DIV/0!
1			0.37					0	0		#DIV/0!	2	1	3	0										0	0	0	0	Col mop	#DIV/0!	#DIV/0!	#DIV/0!	#DIV/0!	#DIV/0!	#DIV/0!	#DIV/0!	#DIV/0!	#DIV/0!	#DIV/0!	#DIV/0!	#DIV/0!	#DIV/0!	#DIV/0!	#DIV/0!	#DIV/0!	#DIV/0!	#DIV/0!	#DIV/0!	#DIV/0!
1	1	Col mop	0.5	3.6	2.5	2.4	3.6	1.225	0	1	1	1	0	1	1			1	0	1					0	0	0	0	Col mop	16.9717	2.35718	4.71435	9.4287	14.1431	18.8574	23.5718	28.2861	51.8579	66.0009	80.144	113.144	2.35718	4.71435	9.4287	14.1431	16.9717	16.9717	16.9717	16.9717
1			0.33					0	0		#DIV/0!	1	1	1	0			1	0	1					0	0	0	0	Col mop	#DIV/0!	#DIV/0!	#DIV/0!	#DIV/0!	#DIV/0!	#DIV/0!	#DIV/0!	#DIV/0!	#DIV/0!	#DIV/0!	#DIV/0!	#DIV/0!	#DIV/0!	#DIV/0!	#DIV/0!	#DIV/0!	#DIV/0!	#DIV/0!	#DIV/0!	#DIV/0!
1	1	Col mop	0.32	4.2	3.2	2	4.2	1.3	0	1	1	1	1	2	1			1	0	1					0	0	0	0	Col mop	22.299	2.65465	5.30929	10.6186	15.9279	21.2372	26.5465	31.8557	58.4022	74.3301	90.258	127.423	2.65465	5.30929	10.6186	15.9279	21.2372	22.299	22.299	22.299
1			0.22					0	0		#DIV/0!	1	1	3	0			1	0	2					0	0	0	0	Col mop	#DIV/0!	#DIV/0!	#DIV/0!	#DIV/0!	#DIV/0!	#DIV/0!	#DIV/0!	#DIV/0!	#DIV/0!	#DIV/0!	#DIV/0!	#DIV/0!	#DIV/0!	#DIV/0!	#DIV/0!	#DIV/0!	#DIV/0!	#DIV/0!	#DIV/0!	#DIV/0!
1			0.11					0	0		#DIV/0!	1	1	3	0			1	0	2					0	0	0	0	Col mop	#DIV/0!	#DIV/0!	#DIV/0!	#DIV/0!	#DIV/0!	#DIV/0!	#DIV/0!	#DIV/0!	#DIV/0!	#DIV/0!	#DIV/0!	#DIV/0!	#DIV/0!	#DIV/0!	#DIV/0!	#DIV/0!	#DIV/0!	#DIV/0!	#DIV/0!	#DIV/0!
1	1	Col mop	0.98	4	4.35	2.9	4	1.8125	0	1	1	1	1	4	1			1	0	1					0	0	0	0	Col mop	41.2825	5.16031	10.3206	20.6412	30.9619	41.2825	51.6031	61.9237	113.527	144.489	175.451	247.695	5.16031	10.3206	20.6412	30.9619	41.2825	41.2825	41.2825	41.2825
1			0.32					0	0		#DIV/0!	1	1	2	0			1	0	1					0	0	0	0	Col mop	#DIV/0!	#DIV/0!	#DIV/0!	#DIV/0!	#DIV/0!	#DIV/0!	#DIV/0!	#DIV/0!	#DIV/0!	#DIV/0!	#DIV/0!	#DIV/0!	#DIV/0!	#DIV/0!	#DIV/0!	#DIV/0!	#DIV/0!	#DIV/0!	#DIV/0!	#DIV/0!
1		Col mop	0.56					0	0		#DIV/0!	2	1	5	1										0	0	0	0	Col mop	#DIV/0!	#DIV/0!	#DIV/0!	#DIV/0!	#DIV/0!	#DIV/0!	#DIV/0!	#DIV/0!	#DIV/0!	#DIV/0!	#DIV/0!	#DIV/0!	#DIV/0!	#DIV/0!	#DIV/0!	#DIV/0!	#DIV/0!	#DIV/0!	#DIV/0!	#DIV/0!
1		Col mop	0.4					0	0		#DIV/0!	4		7	1										0	0	0	0	Col mop	#DIV/0!	#DIV/0!	#DIV/0!	#DIV/0!	#DIV/0!	#DIV/0!	#DIV/0!	#DIV/0!	#DIV/0!	#DIV/0!	#DIV/0!	#DIV/0!	#DIV/0!	#DIV/0!	#DIV/0!	#DIV/0!	#DIV/0!	#DIV/0!	#DIV/0!	#DIV/0!
1	1	Col mop	0.47	4.1	2.7	3.1	4.1	1.45	0	1	1	1	1	3	1			1	0	2					0	0	0	0	Col mop	27.0813	3.3026	6.6052	13.2104	19.8156	26.4208	33.026	39.6312	72.6572	92.4728	112.288	158.525	3.3026	6.6052	13.2104	19.8156	26.4208	27.0813	27.0813	27.0813
1			0.3					0	0		#DIV/0!	2	1	4	0			1	0	2					0	0	0	0	Col mop	#DIV/0!	#DIV/0!	#DIV/0!	#DIV/0!	#DIV/0!	#DIV/0!	#DIV/0!	#DIV/0!	#DIV/0!	#DIV/0!	#DIV/0!	#DIV/0!	#DIV/0!	#DIV/0!	#DIV/0!	#DIV/0!	#DIV/0!	#DIV/0!	#DIV/0!	#DIV/0!
1			0.2					0	0		#DIV/0!	1	1	4	0										0	0	0	0	Col mop	#DIV/0!	#DIV/0!	#DIV/0!	#DIV/0!	#DIV/0!	#DIV/0!	#DIV/0!	#DIV/0!	#DIV/0!	#DIV/0!	#DIV/0!	#DIV/0!	#DIV/0!	#DIV/0!	#DIV/0!	#DIV/0!	#DIV/0!	#DIV/0!	#DIV/0!	#DIV/0!
1	1	Col mop	0.7	4.2	3.1	4.1	4.2	1.8	0	1	1	1	1	3	1			1	0	1					0	0	0	0	Col mop	42.7508	5.08938	10.1788	20.3575	30.5363	40.715	50.8938	61.0726	111.966	142.503	173.039	244.29	5.08938	10.1788	20.3575	30.5363	40.715	42.7508	42.7508	42.7508
1			0.26					0	0		#DIV/0!	1	1	2	0			1	0	1					0	0	0	0	Col mop	#DIV/0!	#DIV/0!	#DIV/0!	#DIV/0!	#DIV/0!	#DIV/0!	#DIV/0!	#DIV/0!	#DIV/0!	#DIV/0!	#DIV/0!	#DIV/0!	#DIV/0!	#DIV/0!	#DIV/0!	#DIV/0!	#DIV/0!	#DIV/0!	#DIV/0!	#DIV/0!
1	1	Col mop	0.4	3.7	3.4	2.9	3.7	1.575	0	1	1	1	1	3	1			1	0	2					0	0	0	0	Col mop	28.8345	3.89656	7.79311	15.5862	23.3793	31.1725	38.9656	46.7587	85.7242	109.104	132.483	187.035	3.89656	7.79311	15.5862	23.3793	28.8345	28.8345	28.8345	28.8345
1			0.12					0	0		#DIV/0!	1	0	3	0										0	0	0	0	Col mop	#DIV/0!	#DIV/0!	#DIV/0!	#DIV/0!	#DIV/0!	#DIV/0!	#DIV/0!	#DIV/0!	#DIV/0!	#DIV/0!	#DIV/0!	#DIV/0!	#DIV/0!	#DIV/0!	#DIV/0!	#DIV/0!	#DIV/0!	#DIV/0!	#DIV/0!	#DIV/0!
1			0.15					0	0		#DIV/0!	1	1	2	0										0	0	0	0	Col mop	#DIV/0!	#DIV/0!	#DIV/0!	#DIV/0!	#DIV/0!	#DIV/0!	#DIV/0!	#DIV/0!	#DIV/0!	#DIV/0!	#DIV/0!	#DIV/0!	#DIV/0!	#DIV/0!	#DIV/0!	#DIV/0!	#DIV/0!	#DIV/0!	#DIV/0!	#DIV/0!
1			0.17					0	0		#DIV/0!	1	1	2	0			1	0	1					0	0	0	0	Col mop	#DIV/0!	#DIV/0!	#DIV/0!	#DIV/0!	#DIV/0!	#DIV/0!	#DIV/0!	#DIV/0!	#DIV/0!	#DIV/0!	#DIV/0!	#DIV/0!	#DIV/0!	#DIV/0!	#DIV/0!	#DIV/0!	#DIV/0!	#DIV/0!	#DIV/0!	#DIV/0!
1			0.25					0	0		#DIV/0!	1	1	3	0			1	0	2					0	0	0	0	Col mop	#DIV/0!	#DIV/0!	#DIV/0!	#DIV/0!	#DIV/0!	#DIV/0!	#DIV/0!	#DIV/0!	#DIV/0!	#DIV/0!	#DIV/0!	#DIV/0!	#DIV/0!	#DIV/0!	#DIV/0!	#DIV/0!	#DIV/0!	#DIV/0!	#DIV/0!	#DIV/0!
1			0.38					0	0		#DIV/0!	1	1	3	0										0	0	0	0	Col mop	#DIV/0!	#DIV/0!	#DIV/0!	#DIV/0!	#DIV/0!	#DIV/0!	#DIV/0!	#DIV/0!	#DIV/0!	#DIV/0!	#DIV/0!	#DIV/0!	#DIV/0!	#DIV/0!	#DIV/0!	#DIV/0!	#DIV/0!	#DIV/0!	#DIV/0!	#DIV/0!
1			0.13					0	0		#DIV/0!	2	1	5	0										0	0	0	0	Col mop	#DIV/0!	#DIV/0!	#DIV/0!	#DIV/0!	#DIV/0!	#DIV/0!	#DIV/0!	#DIV/0!	#DIV/0!	#DIV/0!	#DIV/0!	#DIV/0!	#DIV/0!	#DIV/0!	#DIV/0!	#DIV/0!	#DIV/0!	#DIV/0!	#DIV/0!	#DIV/0!
1			0.2					0	0		#DIV/0!	1	1	2	0			1	0	2					0	0	0	0	Col mop	#DIV/0!	#DIV/0!	#DIV/0!	#DIV/0!	#DIV/0!	#DIV/0!	#DIV/0!	#DIV/0!	#DIV/0!	#DIV/0!	#DIV/0!	#DIV/0!	#DIV/0!	#DIV/0!	#DIV/0!	#DIV/0!	#DIV/0!	#DIV/0!	#DIV/0!	#DIV/0!
1			0.22					0	0		#DIV/0!	1	1	2	0			1	0	1					0	0	0	0	Col mop	#DIV/0!	#DIV/0!	#DIV/0!	#DIV/0!	#DIV/0!	#DIV/0!	#DIV/0!	#DIV/0!	#DIV/0!	#DIV/0!	#DIV/0!	#DIV/0!	#DIV/0!	#DIV/0!	#DIV/0!	#DIV/0!	#DIV/0!	#DIV/0!	#DIV/0!	#DIV/0!
1			0.16					0	0		#DIV/0!	1	1	2	0			1	0	1					0	0	0	0	Col mop	#DIV/0!	#DIV/0!	#DIV/0!	#DIV/0!	#DIV/0!	#DIV/0!	#DIV/0!	#DIV/0!	#DIV/0!	#DIV/0!	#DIV/0!	#DIV/0!	#DIV/0!	#DIV/0!	#DIV/0!	#DIV/0!	#DIV/0!	#DIV/0!	#DIV/0!	#DIV/0!
1			0.14					0	0		#DIV/0!	1	1	2	0			1	0	1					0	0	0	0	Col mop	#DIV/0!	#DIV/0!	#DIV/0!	#DIV/0!	#DIV/0!	#DIV/0!	#DIV/0!	#DIV/0!	#DIV/0!	#DIV/0!	#DIV/0!	#DIV/0!	#DIV/0!	#DIV/0!	#DIV/0!	#DIV/0!	#DIV/0!	#DIV/0!	#DIV/0!	#DIV/0!
1		Col mop	1					0	0		#DIV/0!				1	6									0	0	0	0	Col mop	#DIV/0!	#DIV/0!	#DIV/0!	#DIV/0!	#DIV/0!	#DIV/0!	#DIV/0!	#DIV/0!	#DIV/0!	#DIV/0!	#DIV/0!	#DIV/0!	#DIV/0!	#DIV/0!	#DIV/0!	#DIV/0!	#DIV/0!	#DIV/0!	#DIV/0!	#DIV/0!
1	1	Col mop	0.75	4.8	4.85	4.5	4.8	2.3375	0	1	1	2	1	5	1			1	0	2					0	0	0	0	Col mop	82.3938	8.58268	17.1654	34.3307	51.4961	68.6615	85.8268	102.992	188.819	240.315	291.811	411.969	8.58268	17.1654	34.3307	51.4961	68.6615	82.3938	82.3938	82.3938
1			0.98					0	0		#DIV/0!	2	1	5	0			1	0	1					0	0	0	0	Col mop	#DIV/0!	#DIV/0!	#DIV/0!	#DIV/0!	#DIV/0!	#DIV/0!	#DIV/0!	#DIV/0!	#DIV/0!	#DIV/0!	#DIV/0!	#DIV/0!	#DIV/0!	#DIV/0!	#DIV/0!	#DIV/0!	#DIV/0!	#DIV/0!	#DIV/0!	#DIV/0!
1	1	Col mop	0.7	5	4	3.2	5	1.8	0	1	1	1	1	2	1			1	0	1					0	0	0	0	Col mop	50.8938	5.08938	10.1788	20.3575	30.5363	40.715	50.8938	61.0726	111.966	142.503	173.039	244.29	5.08938	10.1788	20.3575	30.5363	40.715	50.8938	50.8938	50.8938
1			0.65					0	0		#DIV/0!	2	1	5	0			1	0	2					0	0	0	0	Col mop	#DIV/0!	#DIV/0!	#DIV/0!	#DIV/0!	#DIV/0!	#DIV/0!	#DIV/0!	#DIV/0!	#DIV/0!	#DIV/0!	#DIV/0!	#DIV/0!	#DIV/0!	#DIV/0!	#DIV/0!	#DIV/0!	#DIV/0!	#DIV/0!	#DIV/0!	#DIV/0!
1	1	Col mop	1.33	3.8	3.6	3.8	3.3	1.85	0.5	1	1	2	1	5	1			1	0	2					0	0	0	0	Col mop	35.4819	0	5.37605	16.1282	26.8803	37.6324	48.3845	59.1366	112.897	145.153	177.41	252.674	0	5.37605	16.1282	26.8803	35.4819	35.4819	35.4819	35.4819
1			0.25					0	0		#DIV/0!	1	1	2	0										0	0	0	0	Col mop	#DIV/0!	#DIV/0!	#DIV/0!	#DIV/0!	#DIV/0!	#DIV/0!	#DIV/0!	#DIV/0!	#DIV/0!	#DIV/0!	#DIV/0!	#DIV/0!	#DIV/0!	#DIV/0!	#DIV/0!	#DIV/0!	#DIV/0!	#DIV/0!	#DIV/0!	#DIV/0!
1		Col mop	0.7					0	0		#DIV/0!	4	1	3	1			1	0	1					0	0	0	0	Col mop	#DIV/0!	#DIV/0!	#DIV/0!	#DIV/0!	#DIV/0!	#DIV/0!	#DIV/0!	#DIV/0!	#DIV/0!	#DIV/0!	#DIV/0!	#DIV/0!	#DIV/0!	#DIV/0!	#DIV/0!	#DIV/0!	#DIV/0!	#DIV/0!	#DIV/0!	#DIV/0!
1	1	Col mop	0.6	3.4	3	2.1	3.4	1.275	0	1	1	1	1	2	1			1	0	1					0	0	0	0	Col mop	17.364	2.55353	5.10705	10.2141	15.3212	20.4282	25.5353	30.6423	56.1776	71.4987	86.8199	122.569	2.55353	5.10705	10.2141	15.3212	17.364	17.364	17.364	17.364
1			0.25					0	0		#DIV/0!	1	1	3	0			1	0	1					0	0	0	0	Col mop	#DIV/0!	#DIV/0!	#DIV/0!	#DIV/0!	#DIV/0!	#DIV/0!	#DIV/0!	#DIV/0!	#DIV/0!	#DIV/0!	#DIV/0!	#DIV/0!	#DIV/0!	#DIV/0!	#DIV/0!	#DIV/0!	#DIV/0!	#DIV/0!	#DIV/0!	#DIV/0!
1			0.12					0	0		#DIV/0!	1	0	1	0										0	0	0	0	Col mop	#DIV/0!	#DIV/0!	#DIV/0!	#DIV/0!	#DIV/0!	#DIV/0!	#DIV/0!	#DIV/0!	#DIV/0!	#DIV/0!	#DIV/0!	#DIV/0!	#DIV/0!	#DIV/0!	#DIV/0!	#DIV/0!	#DIV/0!	#DIV/0!	#DIV/0!	#DIV/0!
1			0.25					0	0		#DIV/0!	1	1	2	0			1	0	1					0	0	0	0	Col mop	#DIV/0!	#DIV/0!	#DIV/0!	#DIV/0!	#DIV/0!	#DIV/0!	#DIV/0!	#DIV/0!	#DIV/0!	#DIV/0!	#DIV/0!	#DIV/0!	#DIV/0!	#DIV/0!	#DIV/0!	#DIV/0!	#DIV/0!	#DIV/0!	#DIV/0!	#DIV/0!
1	1	Col mop	0.72	5	6.4	4.25	5	2.6625	0	2	2	1	1	2	1			1	0	1					0	0	0	0	Col mop	37.0803	0.0370803	0.296642	2.37314	8.00935	18.9851	37.0803	64.0748	394.831	813.987	1457.4	#DIV/0!	0.0370803	0.296642	2.37314	8.00935	18.9851	37.0803	37.0803	37.0803
1			0.86					0	0		#DIV/0!	2	1	2	0			1	0	1					0	0	0	0	Col mop	#DIV/0!	#DIV/0!	#DIV/0!	#DIV/0!	#DIV/0!	#DIV/0!	#DIV/0!	#DIV/0!	#DIV/0!	#DIV/0!	#DIV/0!	#DIV/0!	#DIV/0!	#DIV/0!	#DIV/0!	#DIV/0!	#DIV/0!	#DIV/0!	#DIV/0!	#DIV/0!
1	1	Col mop	0.5	3.5	3.2	3	3.5	1.55	0	1	1	2	1	4	1			1	0	1					0	0	0	0	Col mop	26.4169	3.77384	7.54768	15.0954	22.643	30.1907	37.7384	45.2861	83.0244	105.667	128.31	181.144	3.77384	7.54768	15.0954	22.643	26.4169	26.4169	26.4169	26.4169
1			0.45					0	0		#DIV/0!	2	1	4	0			1	0	1					0	0	0	0	Col mop	#DIV/0!	#DIV/0!	#DIV/0!	#DIV/0!	#DIV/0!	#DIV/0!	#DIV/0!	#DIV/0!	#DIV/0!	#DIV/0!	#DIV/0!	#DIV/0!	#DIV/0!	#DIV/0!	#DIV/0!	#DIV/0!	#DIV/0!	#DIV/0!	#DIV/0!	#DIV/0!
1			0.38					0	0		#DIV/0!	2	1	4	0			1	0	1					0	0	0	0	Col mop	#DIV/0!	#DIV/0!	#DIV/0!	#DIV/0!	#DIV/0!	#DIV/0!	#DIV/0!	#DIV/0!	#DIV/0!	#DIV/0!	#DIV/0!	#DIV/0!	#DIV/0!	#DIV/0!	#DIV/0!	#DIV/0!	#DIV/0!	#DIV/0!	#DIV/0!	#DIV/0!
1		Col mop	0.38					0	0		#DIV/0!	2	1	4	1			1	0	1					0	0	0	0	Col mop	#DIV/0!	#DIV/0!	#DIV/0!	#DIV/0!	#DIV/0!	#DIV/0!	#DIV/0!	#DIV/0!	#DIV/0!	#DIV/0!	#DIV/0!	#DIV/0!	#DIV/0!	#DIV/0!	#DIV/0!	#DIV/0!	#DIV/0!	#DIV/0!	#DIV/0!	#DIV/0!
1	1	Col mop	1.08	3.5	3.8	4.9	3.5	2.175	0	1	1	2	1	4	1			1	0	1					0	0	0	0	Col mop	52.0159	7.43085	14.8617	29.7234	44.5851	59.4468	74.3085	89.1702	163.479	208.064	252.649	356.681	7.43085	14.8617	29.7234	44.5851	52.0159	52.0159	52.0159	52.0159
1	1	Col mop	1.35	15.3	5.38	4.65	14.3	2.5075	1	7	7	1	1	2	1	2		1	0	1					38	0	0	0	Col mop	265.924	-9.87647	0	19.7529	39.5059	59.2588	79.0118	98.7647	197.529	254.923	238.041	-1018.62	0	0	19.7529	39.5059	59.2588	79.0118	98.7647	197.529
1	1	Col mop	0.42	3.8	2.5	3.1	3.3	1.4	0.5	1	1	1	1	2	1			1	0	1					0	0	0	0	Col mop	20.3198	0	3.07876	9.23628	15.3938	21.5513	27.7088	33.8664	64.654	83.1265	101.599	144.702	0	3.07876	9.23628	15.3938	20.3198	20.3198	20.3198	20.3198
1			0.15					0	0		#DIV/0!	1	1	3	0										0	0	0	0	Col mop	#DIV/0!	#DIV/0!	#DIV/0!	#DIV/0!	#DIV/0!	#DIV/0!	#DIV/0!	#DIV/0!	#DIV/0!	#DIV/0!	#DIV/0!	#DIV/0!	#DIV/0!	#DIV/0!	#DIV/0!	#DIV/0!	#DIV/0!	#DIV/0!	#DIV/0!	#DIV/0!
1			0.1					0	0		#DIV/0!				0	1									0	0	0	0	Col mop	#DIV/0!	#DIV/0!	#DIV/0!	#DIV/0!	#DIV/0!	#DIV/0!	#DIV/0!	#DIV/0!	#DIV/0!	#DIV/0!	#DIV/0!	#DIV/0!	#DIV/0!	#DIV/0!	#DIV/0!	#DIV/0!	#DIV/0!	#DIV/0!	#DIV/0!	#DIV/0!
1		Col mop	0.35					0	0		#DIV/0!	2	1	3	1			1	0	1					0	0	0	0	Col mop	#DIV/0!	#DIV/0!	#DIV/0!	#DIV/0!	#DIV/0!	#DIV/0!	#DIV/0!	#DIV/0!	#DIV/0!	#DIV/0!	#DIV/0!	#DIV/0!	#DIV/0!	#DIV/0!	#DIV/0!	#DIV/0!	#DIV/0!	#DIV/0!	#DIV/0!	#DIV/0!
1			0.25					0	0		#DIV/0!	2	1	4	0			1	0	1					0	0	0	0	Col mop	#DIV/0!	#DIV/0!	#DIV/0!	#DIV/0!	#DIV/0!	#DIV/0!	#DIV/0!	#DIV/0!	#DIV/0!	#DIV/0!	#DIV/0!	#DIV/0!	#DIV/0!	#DIV/0!	#DIV/0!	#DIV/0!	#DIV/0!	#DIV/0!	#DIV/0!	#DIV/0!
1	1	Col mop	0.4	3.8	3	3.7	3.8	1.675	0	1	1	1	1	2	1			1	0	1					0	0	0	0	Col mop	33.4937	4.40707	8.81413	17.6283	26.4424	35.2565	44.0707	52.8848	96.9554	123.398	149.84	211.539	4.40707	8.81413	17.6283	26.4424	33.4937	33.4937	33.4937	33.4937
1			0.3					0	0		#DIV/0!	1	1	3	0			1	0	1					0	0	0	0	Col mop	#DIV/0!	#DIV/0!	#DIV/0!	#DIV/0!	#DIV/0!	#DIV/0!	#DIV/0!	#DIV/0!	#DIV/0!	#DIV/0!	#DIV/0!	#DIV/0!	#DIV/0!	#DIV/0!	#DIV/0!	#DIV/0!	#DIV/0!	#DIV/0!	#DIV/0!	#DIV/0!
1			0.1					0	0		#DIV/0!	2	0	3	0										0	0	0	0	Col mop	#DIV/0!	#DIV/0!	#DIV/0!	#DIV/0!	#DIV/0!	#DIV/0!	#DIV/0!	#DIV/0!	#DIV/0!	#DIV/0!	#DIV/0!	#DIV/0!	#DIV/0!	#DIV/0!	#DIV/0!	#DIV/0!	#DIV/0!	#DIV/0!	#DIV/0!	#DIV/0!
1	1	Col mop	0.43	3.5	3.3	2.7	3.5	1.5	0	1	1	1	1	2	1			1	0	1					0	0	0	0	Col mop	24.74	3.53429	7.06858	14.1372	21.2058	28.2743	35.3429	42.4115	77.7544	98.9602	120.166	169.646	3.53429	7.06858	14.1372	21.2058	24.74	24.74	24.74	24.74
1			0.23					0	0		#DIV/0!	1	1	2	0			1	0	1					0	0	0	0	Col mop	#DIV/0!	#DIV/0!	#DIV/0!	#DIV/0!	#DIV/0!	#DIV/0!	#DIV/0!	#DIV/0!	#DIV/0!	#DIV/0!	#DIV/0!	#DIV/0!	#DIV/0!	#DIV/0!	#DIV/0!	#DIV/0!	#DIV/0!	#DIV/0!	#DIV/0!	#DIV/0!
1			0.27					0	0		#DIV/0!	1	1	2	0			1	0	1					0	0	0	0	Col mop	#DIV/0!	#DIV/0!	#DIV/0!	#DIV/0!	#DIV/0!	#DIV/0!	#DIV/0!	#DIV/0!	#DIV/0!	#DIV/0!	#DIV/0!	#DIV/0!	#DIV/0!	#DIV/0!	#DIV/0!	#DIV/0!	#DIV/0!	#DIV/0!	#DIV/0!	#DIV/0!
1			0.3					0	0		#DIV/0!	1	1	2	0			1	0	1					0	0	0	0	Col mop	#DIV/0!	#DIV/0!	#DIV/0!	#DIV/0!	#DIV/0!	#DIV/0!	#DIV/0!	#DIV/0!	#DIV/0!	#DIV/0!	#DIV/0!	#DIV/0!	#DIV/0!	#DIV/0!	#DIV/0!	#DIV/0!	#DIV/0!	#DIV/0!	#DIV/0!	#DIV/0!
1	1	Col mop	1.55	15	7.4	6.5	4.5	3.475	10.5	7	7	1	1	1	1			1	0	1					38	0	0	0	Col mop	126.684	-379.367	-360.399	-322.462	-284.525	-246.589	-208.652	-170.715	18.9683	116.824	74.6902	-1519.36	0	0	0	0	0	0	0	18.9683
1			0.7					0	0		#DIV/0!	1	1	2	0			1	0	1					0	0	0	0	Col mop	#DIV/0!	#DIV/0!	#DIV/0!	#DIV/0!	#DIV/0!	#DIV/0!	#DIV/0!	#DIV/0!	#DIV/0!	#DIV/0!	#DIV/0!	#DIV/0!	#DIV/0!	#DIV/0!	#DIV/0!	#DIV/0!	#DIV/0!	#DIV/0!	#DIV/0!	#DIV/0!
1			0.3					0	0		#DIV/0!	1	0	2	0										0	0	0	0	Col mop	#DIV/0!	#DIV/0!	#DIV/0!	#DIV/0!	#DIV/0!	#DIV/0!	#DIV/0!	#DIV/0!	#DIV/0!	#DIV/0!	#DIV/0!	#DIV/0!	#DIV/0!	#DIV/0!	#DIV/0!	#DIV/0!	#DIV/0!	#DIV/0!	#DIV/0!	#DIV/0!
1			0.23					0	0		#DIV/0!	1	1	2	0			1	0	1					0	0	0	0	Col mop	#DIV/0!	#DIV/0!	#DIV/0!	#DIV/0!	#DIV/0!	#DIV/0!	#DIV/0!	#DIV/0!	#DIV/0!	#DIV/0!	#DIV/0!	#DIV/0!	#DIV/0!	#DIV/0!	#DIV/0!	#DIV/0!	#DIV/0!	#DIV/0!	#DIV/0!	#DIV/0!
1	1	Col mop	0.45	5	4.9	4.3	5	2.3	0	1	1	1	1	2	1			1	0	1					0	0	0	0	Col mop	83.0951	8.30951	16.619	33.2381	49.8571	66.4761	83.0951	99.7142	182.809	232.666	282.523	398.857	8.30951	16.619	33.2381	49.8571	66.4761	83.0951	83.0951	83.0951
1			0.65					0	0		#DIV/0!	2	0	3	0			1	0	1					0	0	0	0	Col mop	#DIV/0!	#DIV/0!	#DIV/0!	#DIV/0!	#DIV/0!	#DIV/0!	#DIV/0!	#DIV/0!	#DIV/0!	#DIV/0!	#DIV/0!	#DIV/0!	#DIV/0!	#DIV/0!	#DIV/0!	#DIV/0!	#DIV/0!	#DIV/0!	#DIV/0!	#DIV/0!
1			0.55					0	0		#DIV/0!	1	1	3	0			1	0	1					0	0	0	0	Col mop	#DIV/0!	#DIV/0!	#DIV/0!	#DIV/0!	#DIV/0!	#DIV/0!	#DIV/0!	#DIV/0!	#DIV/0!	#DIV/0!	#DIV/0!	#DIV/0!	#DIV/0!	#DIV/0!	#DIV/0!	#DIV/0!	#DIV/0!	#DIV/0!	#DIV/0!	#DIV/0!
1			0.32					0	0		#DIV/0!	1	1	2	0			1	0	2					0	0	0	0	Col mop	#DIV/0!	#DIV/0!	#DIV/0!	#DIV/0!	#DIV/0!	#DIV/0!	#DIV/0!	#DIV/0!	#DIV/0!	#DIV/0!	#DIV/0!	#DIV/0!	#DIV/0!	#DIV/0!	#DIV/0!	#DIV/0!	#DIV/0!	#DIV/0!	#DIV/0!	#DIV/0!
1	1	Col mop	0.4	3.4	4.25	3.5	3.4	1.9375	0	1	1	1	1	2	1			1	0	1					0	0	0	0	Col mop	40.097	5.89662	11.7932	23.5865	35.3797	47.173	58.9662	70.7595	129.726	165.105	200.485	283.038	5.89662	11.7932	23.5865	35.3797	40.097	40.097	40.097	40.097
1			0.5					0	0		#DIV/0!	2		7	0										0	0	0	0	Col mop	#DIV/0!	#DIV/0!	#DIV/0!	#DIV/0!	#DIV/0!	#DIV/0!	#DIV/0!	#DIV/0!	#DIV/0!	#DIV/0!	#DIV/0!	#DIV/0!	#DIV/0!	#DIV/0!	#DIV/0!	#DIV/0!	#DIV/0!	#DIV/0!	#DIV/0!	#DIV/0!
1	1	Col mop	0.74	4.5	3.8	3.6	4.5	1.85	0	1	1	1	1	4	1			1	0	1					0	0	0	0	Col mop	48.3845	5.37605	10.7521	21.5042	32.2563	43.0084	53.7605	64.5126	118.273	150.529	182.786	258.05	5.37605	10.7521	21.5042	32.2563	43.0084	48.3845	48.3845	48.3845
1			0.2					0	0		#DIV/0!				0										0	0	0	0	Col mop	#DIV/0!	#DIV/0!	#DIV/0!	#DIV/0!	#DIV/0!	#DIV/0!	#DIV/0!	#DIV/0!	#DIV/0!	#DIV/0!	#DIV/0!	#DIV/0!	#DIV/0!	#DIV/0!	#DIV/0!	#DIV/0!	#DIV/0!	#DIV/0!	#DIV/0!	#DIV/0!
1	1	Col mop	0.7	4.5	3.2	3.65	4.5	1.7125	0	1	1	1	1	3	1			1	0	1					0	0	18	0	Col mop	41.4595	4.60661	9.21321	18.4264	27.6396	36.8528	46.0661	55.2793	101.345	128.985	156.625	221.117	4.60661	9.21321	18.4264	27.6396	36.8528	41.4595	41.4595	41.4595
1	1	Col mop	1.3	4.1	3.9	4	4.1	1.975	0	1	1	2	1	5	1			1	0	2					0	0	0	0	Col mop	50.2421	6.12709	12.2542	24.5083	36.7625	49.0167	61.2709	73.525	134.796	171.558	208.321	294.1	6.12709	12.2542	24.5083	36.7625	49.0167	50.2421	50.2421	50.2421
1	1	Col mop	0.7	5	3.63	3.95	4	1.895	1	1	1	2	1	4	1			1	0	1					0	0	0	0	Col mop	45.1262	-5.64077	0	11.2815	22.5631	33.8446	45.1262	56.4077	112.815	146.66	180.505	259.475	0	0	11.2815	22.5631	33.8446	45.1262	45.1262	45.1262
1	1	Col mop	0.8	4.6	4.1	4	4.6	2.025	0	1	1	1	1	2	1			1	0	1					0	0	0	0	Col mop	59.2595	6.44125	12.8825	25.765	38.6475	51.53	64.4125	77.295	141.707	180.355	219.002	309.18	6.44125	12.8825	25.765	38.6475	51.53	59.2595	59.2595	59.2595
1			0.43					0	0		#DIV/0!	1	1	2	0			1	0	1					0	0	0	0	Col mop	#DIV/0!	#DIV/0!	#DIV/0!	#DIV/0!	#DIV/0!	#DIV/0!	#DIV/0!	#DIV/0!	#DIV/0!	#DIV/0!	#DIV/0!	#DIV/0!	#DIV/0!	#DIV/0!	#DIV/0!	#DIV/0!	#DIV/0!	#DIV/0!	#DIV/0!	#DIV/0!
1			0.35					0	0		#DIV/0!	2	1	4	0			1	0	1					0	0	0	0	Col mop	#DIV/0!	#DIV/0!	#DIV/0!	#DIV/0!	#DIV/0!	#DIV/0!	#DIV/0!	#DIV/0!	#DIV/0!	#DIV/0!	#DIV/0!	#DIV/0!	#DIV/0!	#DIV/0!	#DIV/0!	#DIV/0!	#DIV/0!	#DIV/0!	#DIV/0!	#DIV/0!
1	1	Col mop	0.26	5.2	5.9	2.8	5.2	2.175	0	1	1	1	0	2	1										0	0	0	0	Col mop	77.2808	7.43085	14.8617	29.7234	44.5851	59.4468	74.3085	89.1702	163.479	208.064	252.649	356.681	7.43085	14.8617	29.7234	44.5851	59.4468	74.3085	77.2808	77.2808
1			0.5					0	0		#DIV/0!	1	1	3	0			1	0	2					0	0	0	0	Col mop	#DIV/0!	#DIV/0!	#DIV/0!	#DIV/0!	#DIV/0!	#DIV/0!	#DIV/0!	#DIV/0!	#DIV/0!	#DIV/0!	#DIV/0!	#DIV/0!	#DIV/0!	#DIV/0!	#DIV/0!	#DIV/0!	#DIV/0!	#DIV/0!	#DIV/0!	#DIV/0!
1			0.25					0	0		#DIV/0!	1	1	3	0										0	0	0	0	Col mop	#DIV/0!	#DIV/0!	#DIV/0!	#DIV/0!	#DIV/0!	#DIV/0!	#DIV/0!	#DIV/0!	#DIV/0!	#DIV/0!	#DIV/0!	#DIV/0!	#DIV/0!	#DIV/0!	#DIV/0!	#DIV/0!	#DIV/0!	#DIV/0!	#DIV/0!	#DIV/0!
1			0.4					0	0		#DIV/0!	1	0	2	0										0	0	0	0	Col mop	#DIV/0!	#DIV/0!	#DIV/0!	#DIV/0!	#DIV/0!	#DIV/0!	#DIV/0!	#DIV/0!	#DIV/0!	#DIV/0!	#DIV/0!	#DIV/0!	#DIV/0!	#DIV/0!	#DIV/0!	#DIV/0!	#DIV/0!	#DIV/0!	#DIV/0!	#DIV/0!
1			0.3					0	0		#DIV/0!	1	0	2	0			1	0	1					0	0	0	0	Col mop	#DIV/0!	#DIV/0!	#DIV/0!	#DIV/0!	#DIV/0!	#DIV/0!	#DIV/0!	#DIV/0!	#DIV/0!	#DIV/0!	#DIV/0!	#DIV/0!	#DIV/0!	#DIV/0!	#DIV/0!	#DIV/0!	#DIV/0!	#DIV/0!	#DIV/0!	#DIV/0!
1		Col mop	0.55					0	0		#DIV/0!	2	1	5	1			1	0	2					0	0	0	0	Col mop	#DIV/0!	#DIV/0!	#DIV/0!	#DIV/0!	#DIV/0!	#DIV/0!	#DIV/0!	#DIV/0!	#DIV/0!	#DIV/0!	#DIV/0!	#DIV/0!	#DIV/0!	#DIV/0!	#DIV/0!	#DIV/0!	#DIV/0!	#DIV/0!	#DIV/0!	#DIV/0!
1			0.23					0	0		#DIV/0!	2	1	4	0			1	0	1					0	0	0	0	Col mop	#DIV/0!	#DIV/0!	#DIV/0!	#DIV/0!	#DIV/0!	#DIV/0!	#DIV/0!	#DIV/0!	#DIV/0!	#DIV/0!	#DIV/0!	#DIV/0!	#DIV/0!	#DIV/0!	#DIV/0!	#DIV/0!	#DIV/0!	#DIV/0!	#DIV/0!	#DIV/0!
1	1	Col mop	1.25	6	4.5	4.9	6	2.35	0	3	3	1	1	3	1			1	0	1					0	0	0	0	Col mop	34.6642	7.96394	14.6039	24.3933	30.3312	33.3803	34.5037	34.6642	54.7245	116.831	248.266	970.597	7.96394	14.6039	24.3933	30.3312	33.3803	34.5037	34.6642	34.6642
1	1	Col mop	0.36	4.7	5.5	4.5	4.2	2.5	0.5	1	1	1	1	3	1			1	0	1					0	0	0	0	Col mop	82.4668	0	9.81748	29.4524	49.0874	68.7223	88.3573	107.992	206.167	265.072	323.977	461.421	0	9.81748	29.4524	49.0874	68.7223	82.4668	82.4668	82.4668
1			0.3					0	0		#DIV/0!	1	1	3	0			1	0	1					0	0	0	0	Col mop	#DIV/0!	#DIV/0!	#DIV/0!	#DIV/0!	#DIV/0!	#DIV/0!	#DIV/0!	#DIV/0!	#DIV/0!	#DIV/0!	#DIV/0!	#DIV/0!	#DIV/0!	#DIV/0!	#DIV/0!	#DIV/0!	#DIV/0!	#DIV/0!	#DIV/0!	#DIV/0!
1			0.38					0	0		#DIV/0!	1	1	2	0			1	0	1					0	0	0	0	Col mop	#DIV/0!	#DIV/0!	#DIV/0!	#DIV/0!	#DIV/0!	#DIV/0!	#DIV/0!	#DIV/0!	#DIV/0!	#DIV/0!	#DIV/0!	#DIV/0!	#DIV/0!	#DIV/0!	#DIV/0!	#DIV/0!	#DIV/0!	#DIV/0!	#DIV/0!	#DIV/0!
1			0.4					0	0		#DIV/0!	1	1	2	0			1	0	2					0	0	0	0	Col mop	#DIV/0!	#DIV/0!	#DIV/0!	#DIV/0!	#DIV/0!	#DIV/0!	#DIV/0!	#DIV/0!	#DIV/0!	#DIV/0!	#DIV/0!	#DIV/0!	#DIV/0!	#DIV/0!	#DIV/0!	#DIV/0!	#DIV/0!	#DIV/0!	#DIV/0!	#DIV/0!
1			0.25					0	0		#DIV/0!	1	1	3	0										0	0	0	0	Col mop	#DIV/0!	#DIV/0!	#DIV/0!	#DIV/0!	#DIV/0!	#DIV/0!	#DIV/0!	#DIV/0!	#DIV/0!	#DIV/0!	#DIV/0!	#DIV/0!	#DIV/0!	#DIV/0!	#DIV/0!	#DIV/0!	#DIV/0!	#DIV/0!	#DIV/0!	#DIV/0!
1			0.32					0	0		#DIV/0!	1	1	2	0			1	0	1					0	0	0	0	Col mop	#DIV/0!	#DIV/0!	#DIV/0!	#DIV/0!	#DIV/0!	#DIV/0!	#DIV/0!	#DIV/0!	#DIV/0!	#DIV/0!	#DIV/0!	#DIV/0!	#DIV/0!	#DIV/0!	#DIV/0!	#DIV/0!	#DIV/0!	#DIV/0!	#DIV/0!	#DIV/0!
1	1	Col mop	0.2	4.4	3.2	4	3.9	1.8	0.5	1	1	2	1	4	1			1	0	1					0	0	0	0	Col mop	39.6972	-4.52028e-15	5.08938	15.2681	25.4469	35.6257	45.8044	55.9832	106.877	137.413	167.95	239.201	0	5.08938	15.2681	25.4469	35.6257	39.6972	39.6972	39.6972
1			0.3					0	0		#DIV/0!	1	1	3	0			1	0	2					0	0	0	0	Col mop	#DIV/0!	#DIV/0!	#DIV/0!	#DIV/0!	#DIV/0!	#DIV/0!	#DIV/0!	#DIV/0!	#DIV/0!	#DIV/0!	#DIV/0!	#DIV/0!	#DIV/0!	#DIV/0!	#DIV/0!	#DIV/0!	#DIV/0!	#DIV/0!	#DIV/0!	#DIV/0!
1			0.23					0	0		#DIV/0!				0	7									0	0	0	0	Col mop	#DIV/0!	#DIV/0!	#DIV/0!	#DIV/0!	#DIV/0!	#DIV/0!	#DIV/0!	#DIV/0!	#DIV/0!	#DIV/0!	#DIV/0!	#DIV/0!	#DIV/0!	#DIV/0!	#DIV/0!	#DIV/0!	#DIV/0!	#DIV/0!	#DIV/0!	#DIV/0!
1			0.3					0	0		#DIV/0!	2		7	0										0	0	0	0	Col mop	#DIV/0!	#DIV/0!	#DIV/0!	#DIV/0!	#DIV/0!	#DIV/0!	#DIV/0!	#DIV/0!	#DIV/0!	#DIV/0!	#DIV/0!	#DIV/0!	#DIV/0!	#DIV/0!	#DIV/0!	#DIV/0!	#DIV/0!	#DIV/0!	#DIV/0!	#DIV/0!
1			0.12					0	0		#DIV/0!	1	0	2	0										0	0	0	0	Col mop	#DIV/0!	#DIV/0!	#DIV/0!	#DIV/0!	#DIV/0!	#DIV/0!	#DIV/0!	#DIV/0!	#DIV/0!	#DIV/0!	#DIV/0!	#DIV/0!	#DIV/0!	#DIV/0!	#DIV/0!	#DIV/0!	#DIV/0!	#DIV/0!	#DIV/0!	#DIV/0!
1	1	Col mop	0.53	4.8	5	4.5	4.8	2.375	0	1	1	2	1	5	1			1	0	2					0	0	0	0	Col mop	85.0586	8.86027	17.7205	35.4411	53.1616	70.8822	88.6027	106.323	194.926	248.088	301.249	425.293	8.86027	17.7205	35.4411	53.1616	70.8822	85.0586	85.0586	85.0586
1			0.58					0	0		#DIV/0!	2	1	5	0			1	0	2					0	0	0	0	Col mop	#DIV/0!	#DIV/0!	#DIV/0!	#DIV/0!	#DIV/0!	#DIV/0!	#DIV/0!	#DIV/0!	#DIV/0!	#DIV/0!	#DIV/0!	#DIV/0!	#DIV/0!	#DIV/0!	#DIV/0!	#DIV/0!	#DIV/0!	#DIV/0!	#DIV/0!	#DIV/0!
1			0.48					0	0		#DIV/0!	2	1	3	0										0	0	0	0	Col mop	#DIV/0!	#DIV/0!	#DIV/0!	#DIV/0!	#DIV/0!	#DIV/0!	#DIV/0!	#DIV/0!	#DIV/0!	#DIV/0!	#DIV/0!	#DIV/0!	#DIV/0!	#DIV/0!	#DIV/0!	#DIV/0!	#DIV/0!	#DIV/0!	#DIV/0!	#DIV/0!
1			0.3					0	0		#DIV/0!	2	1	4	0			1	0	1					0	0	0	0	Col mop	#DIV/0!	#DIV/0!	#DIV/0!	#DIV/0!	#DIV/0!	#DIV/0!	#DIV/0!	#DIV/0!	#DIV/0!	#DIV/0!	#DIV/0!	#DIV/0!	#DIV/0!	#DIV/0!	#DIV/0!	#DIV/0!	#DIV/0!	#DIV/0!	#DIV/0!	#DIV/0!
1			0.15					0	0		#DIV/0!	2	0	4	0										0	0	0	0	Col mop	#DIV/0!	#DIV/0!	#DIV/0!	#DIV/0!	#DIV/0!	#DIV/0!	#DIV/0!	#DIV/0!	#DIV/0!	#DIV/0!	#DIV/0!	#DIV/0!	#DIV/0!	#DIV/0!	#DIV/0!	#DIV/0!	#DIV/0!	#DIV/0!	#DIV/0!	#DIV/0!
1	1	Col mop	1.35	4.8	5.75	7.95	4.3	3.425	0.5	1	1	2	1	2	1			1	0	1					0	0	0	0	Col mop	158.467	0	18.4264	55.2793	92.1321	128.985	165.838	202.691	386.955	497.513	608.072	866.042	0	18.4264	55.2793	92.1321	128.985	158.467	158.467	158.467
2	1	Col mopA	1.68	14	8.6	8.05	13	4.1625	1	3	3	1	0	1	1	1									63	0	0	0	Col mopA	235.638	-28.2482	0	50.3024	92.8825	128.384	157.45	180.724	232.742	235.638	238.534	342.893	0	0	50.3024	92.8825	128.384	157.45	180.724	232.742
2	1	Col mopA	1.85	15	8.1	7.3	15	3.85	0	3	3			3	1			1	0	1					63	0	0	0	Col mopA	232.598	22.4931	43.4873	81.1855	113.508	140.869	163.68	182.357	228.188	232.53	233.15	282.84	22.4931	43.4873	81.1855	113.508	140.869	163.68	182.357	228.188
2	1	Col mopA	1.8	18.3	9.05	9.5	14.3	4.6375	4	3	3	1	0	1	1	1									63	0	0	0	Col mopA	321.735	-298.777	-247.942	-154.754	-72.3269	0	62.8868	116.994	278.933	312.987	321.493	342.111	0	0	0	0	0	62.8868	116.994	278.933
2	1	Col mopA	1.75	11.4	6.45	7.2	10.2	3.4125	1.2	3	3	1	1	2	1	1									18	0	0	0	Col mopA	124.262	-27.3793	-7.45381	27.005	54.8596	76.8126	93.5666	105.824	124.255	126.32	144.826	358.497	0	0	27.005	54.8596	76.8126	93.5666	105.824	124.255
2	1	Col mopA	1.58	16.8	7.9	9.1	15.8	4.25	1	3	3	1	0	1	1	1		1	0	1					38	0	0	0	Col mopA	298.558	-29.2506	-3.35662e-14	53.1761	99.6306	139.818	174.192	203.206	283.79	296.897	298.559	326.811	0	0	53.1761	99.6306	139.818	174.192	203.206	283.79
2	1	Col mopA	1.2	15.5	6.6	6.2	8.5	3.2	7	1	1				1	1									18	0	0	0	Col mopA	273.444	-209.104	-193.019	-160.85	-128.68	-96.5097	-64.3398	-32.1699	128.68	225.189	321.699	546.888	0	0	0	0	0	0	0	128.68
2	1	Col mopA	1.9	16.2	7.4	7.7	13.2	3.775	3	7	7	1	0	1	1	1									38	0	0	0	Col mopA	534.512	-111.924	-89.5393	-44.7697	0	44.7697	89.5393	134.309	358.157	488.308	526.394	-682.752	0	0	0	0	44.7697	89.5393	134.309	358.157
2	1	Col mopA	1.7	13.7	8.65	6.6	13.7	3.8125	0	3	3	1	0	2	1	1									18	0	18	0	Col mopA	208.322	21.9866	42.3691	78.5648	109.073	134.38	154.972	171.335	206.727	208.324	211.233	296.85	21.9866	42.3691	78.5648	109.073	134.38	154.972	171.335	206.727
2			0.95					0	0		#DIV/0!	2	1	4	0			1	0	1					0	0	0	0	Col mopA	#DIV/0!	#DIV/0!	#DIV/0!	#DIV/0!	#DIV/0!	#DIV/0!	#DIV/0!	#DIV/0!	#DIV/0!	#DIV/0!	#DIV/0!	#DIV/0!	#DIV/0!	#DIV/0!	#DIV/0!	#DIV/0!	#DIV/0!	#DIV/0!	#DIV/0!	#DIV/0!
2	1	Col mopA	1.5	13.7	8.82	7.3	13.7	4.03	0	3	3				1			1	0	1					38	0	5.5	0	Col mopA	232.769	24.5668	47.3413	87.7846	121.873	150.15	173.159	191.442	230.987	232.771	236.022	331.687	24.5668	47.3413	87.7846	121.873	150.15	173.159	191.442	230.987
2			0.8					0	0		#DIV/0!	2	1	5	0			1	0	2					0	0	0	0	Col mopA	#DIV/0!	#DIV/0!	#DIV/0!	#DIV/0!	#DIV/0!	#DIV/0!	#DIV/0!	#DIV/0!	#DIV/0!	#DIV/0!	#DIV/0!	#DIV/0!	#DIV/0!	#DIV/0!	#DIV/0!	#DIV/0!	#DIV/0!	#DIV/0!	#DIV/0!	#DIV/0!
															0
															0
															0
															0
															0
															0
															0
															0
															0
															0
															0
															0
															0
															0
															0
															0
															0
															0
															0
															0
															0
															0
															0
															0
															0
															0
															0
															0
															0
															0
															0
															0
															0
															0
															0
															0
															0
															0
															0
															0
															0
															0
															0
															0
															0
															0
															0
															0
															0
															0
															0
															0
															0
															0
															0
															0
															0
															0
															0
															0
															0
															0
															0
															0
															0
															0
															0
															0
															0
															0
															0
															0
															0
															0
															0
															0
															0
															0
															0
															0
															0
															0
															0
															0
															0
															0
															0
															0
															0
															0
															0
															0
															0
															0
															0
															0
															0
															0
															0
															0
															0
															0
															0
															0
															0
															0
															0
															0
															0
															0
															0
															0
															0
															0
															0
															0
															0
															0
															0
															0
															0
															0
															0
															0
															0
															0
															0
															0
															0
															0
															0
															0
															0
															0
															0
															0
															0
															0
															0
															0
															0
															0
															0
															0
															0
															0
															0
															0
															0
															0
															0
															0
															0
															0
															0
															0
															0
															0
															0
															0
															0
															0
															0
															0
															0
															0
															0
															0
															0
															0
															0
															0
															0
															0
															0
															0
															0
															0
															0
															0
															0
															0
															0
															0
															0
															0
															0
															0
															0
															0
															0
															0
															0
															0
															0
															0
															0
															0
															0
															0
															0
															0
															0
															0
[truncated: 68 more columns]

## Sheet: Site2
Date:	22/8/2014														Tree density ≤ 10m (no/ha)	200
Trans. No.:	GNP3														Tree density > 10m (no/ha)	16
			Transect 1									Transect 2 for Tall Trees (GPS coordinates)			Tree height (m)	5.02963
			Width (m)	Length (m)	Area (ha)							Initial	Extension	Total area (ha)	Lower level of canopy (m)	#REF!
	Transect Dimensions:		25	50	0.125							1424.41	8149.3	0.957371
	Co-ordinates:			X	Y								X	Y
			NW Corner									NW Corner
			SW Corner									SW Corner
			NE Corner									NE Corner
			SE Corner									SE Corner
			Max
			2.82	17.5								OED				OUD	DRT	NED				NUD	NFD	OFD	OBE	OBU	NBE	NBU	RE	Canopy volume (m3) up to specified height class	Height classes (m)
Trans. No.	Tree	Sp. Code	Stem Circum.(cm)	Height (m)	D1 (m)	D2 (m)	CD (m)	R	Y	Shape	Adj. Shape	F	C	S	Tree			F	C	S	E									Total	0.5	1	2	3	4	5	6	11	14	17	24	0.5	1	2	3	4	5	6	11
1	1	Col mop	0.6	5	4.1	4.1	5	2.05	0	1	1	1	1	3	1			1	0	2					0	0	0	0	Col mop	66.0127	6.60127	13.2025	26.4051	39.6076	52.8102	66.0127	79.2153	145.228	184.836	224.443	316.861	6.60127	13.2025	26.4051	39.6076	52.8102	66.0127	66.0127	66.0127
1			0.38					0	0		#DIV/0!	1	1	2	0			1	0	2					0	0	0	0	Col mop	#DIV/0!	#DIV/0!	#DIV/0!	#DIV/0!	#DIV/0!	#DIV/0!	#DIV/0!	#DIV/0!	#DIV/0!	#DIV/0!	#DIV/0!	#DIV/0!	#DIV/0!	#DIV/0!	#DIV/0!	#DIV/0!	#DIV/0!	#DIV/0!	#DIV/0!	#DIV/0!
1			0.21					0	0		#DIV/0!	1	0	2	0										0	0	0	0	Col mop	#DIV/0!	#DIV/0!	#DIV/0!	#DIV/0!	#DIV/0!	#DIV/0!	#DIV/0!	#DIV/0!	#DIV/0!	#DIV/0!	#DIV/0!	#DIV/0!	#DIV/0!	#DIV/0!	#DIV/0!	#DIV/0!	#DIV/0!	#DIV/0!	#DIV/0!	#DIV/0!
1			0.25					0	0		#DIV/0!	1	0	2	0			1	0	1					0	0	0	0	Col mop	#DIV/0!	#DIV/0!	#DIV/0!	#DIV/0!	#DIV/0!	#DIV/0!	#DIV/0!	#DIV/0!	#DIV/0!	#DIV/0!	#DIV/0!	#DIV/0!	#DIV/0!	#DIV/0!	#DIV/0!	#DIV/0!	#DIV/0!	#DIV/0!	#DIV/0!	#DIV/0!
1	1	Col mop	0.6	3.8	3.6	3.9	3.3	1.875	0.5	1	1	2	1	5	1			1	0	2					0	0	0	0	Col mop	36.4474	0	5.52233	16.567	27.6117	38.6563	49.701	60.7456	115.969	149.103	182.237	259.55	0	5.52233	16.567	27.6117	36.4474	36.4474	36.4474	36.4474
1			0.43					0	0		#DIV/0!	2	1	5	0			1	0	2					0	0	0	0	Col mop	#DIV/0!	#DIV/0!	#DIV/0!	#DIV/0!	#DIV/0!	#DIV/0!	#DIV/0!	#DIV/0!	#DIV/0!	#DIV/0!	#DIV/0!	#DIV/0!	#DIV/0!	#DIV/0!	#DIV/0!	#DIV/0!	#DIV/0!	#DIV/0!	#DIV/0!	#DIV/0!
1			0.36					0	0		#DIV/0!	2	1	5	0			1	0	2					0	0	0	0	Col mop	#DIV/0!	#DIV/0!	#DIV/0!	#DIV/0!	#DIV/0!	#DIV/0!	#DIV/0!	#DIV/0!	#DIV/0!	#DIV/0!	#DIV/0!	#DIV/0!	#DIV/0!	#DIV/0!	#DIV/0!	#DIV/0!	#DIV/0!	#DIV/0!	#DIV/0!	#DIV/0!
1	1	Col mop	0.4	3.8	3.05	3.3	3.8	1.5875	0	1	1	2	1	5	1			1	0	2					0	0	0	0	Col mop	30.0858	3.95865	7.9173	15.8346	23.7519	31.6692	39.5865	47.5038	87.0903	110.842	134.594	190.015	3.95865	7.9173	15.8346	23.7519	30.0858	30.0858	30.0858	30.0858
1			0.32					0	0		#DIV/0!	1	1	3	0			1	0	2					0	0	0	0	Col mop	#DIV/0!	#DIV/0!	#DIV/0!	#DIV/0!	#DIV/0!	#DIV/0!	#DIV/0!	#DIV/0!	#DIV/0!	#DIV/0!	#DIV/0!	#DIV/0!	#DIV/0!	#DIV/0!	#DIV/0!	#DIV/0!	#DIV/0!	#DIV/0!	#DIV/0!	#DIV/0!
1			0.13					0	0		#DIV/0!	1	0	2	0			1	0	1					0	0	0	0	Col mop	#DIV/0!	#DIV/0!	#DIV/0!	#DIV/0!	#DIV/0!	#DIV/0!	#DIV/0!	#DIV/0!	#DIV/0!	#DIV/0!	#DIV/0!	#DIV/0!	#DIV/0!	#DIV/0!	#DIV/0!	#DIV/0!	#DIV/0!	#DIV/0!	#DIV/0!	#DIV/0!
1	1	Col mop	0.73	4.3	3.9	4.15	3.8	2.0125	0.5	1	1	2	1	5	1			1	0	1					0	0	0	0	Col mop	48.351	0	6.36197	19.0859	31.8099	44.5338	57.2577	69.9817	133.601	171.773	209.945	299.013	0	6.36197	19.0859	31.8099	44.5338	48.351	48.351	48.351
1	1	Col mop	1.78	16.4	12.8	14.3	15.4	6.775	1	3	3	1	1	1	1	1		1	0	1					38	0	0	0	Col mop	739.492	-74.3923	2.55896e-13	134.905	252.316	353.448	439.516	511.735	707.609	736.693	739.536	828.374	0	2.55896e-13	134.905	252.316	353.448	439.516	511.735	707.609
1	1	Col mop	1.15	4.5	4.7	4.35	3.5	2.2625	1	1	1	2	1	5	1			1	0	2					0	0	0	0	Col mop	56.2853	-8.04076	0	16.0815	32.163	48.2446	64.3261	80.4076	160.815	209.06	257.304	369.875	0	0	16.0815	32.163	48.2446	56.2853	56.2853	56.2853
1			0.76					0	0		#DIV/0!	1	1	4	0			1	0	2					0	0	0	0	Col mop	#DIV/0!	#DIV/0!	#DIV/0!	#DIV/0!	#DIV/0!	#DIV/0!	#DIV/0!	#DIV/0!	#DIV/0!	#DIV/0!	#DIV/0!	#DIV/0!	#DIV/0!	#DIV/0!	#DIV/0!	#DIV/0!	#DIV/0!	#DIV/0!	#DIV/0!	#DIV/0!
1			0.25					0	0		#DIV/0!	1	1	3	0										0	0	0	0	Col mop	#DIV/0!	#DIV/0!	#DIV/0!	#DIV/0!	#DIV/0!	#DIV/0!	#DIV/0!	#DIV/0!	#DIV/0!	#DIV/0!	#DIV/0!	#DIV/0!	#DIV/0!	#DIV/0!	#DIV/0!	#DIV/0!	#DIV/0!	#DIV/0!	#DIV/0!	#DIV/0!
1	1	Col mop	1.2	4.5	4.05	3.4	4.5	1.8625	0	1	1	2	1	5	1			1	0	2					0	0	0	0	Col mop	49.0405	5.44895	10.8979	21.7958	32.6937	43.5916	54.4895	65.3873	119.877	152.57	185.264	261.549	5.44895	10.8979	21.7958	32.6937	43.5916	49.0405	49.0405	49.0405
1	1	Col mop	0.8	5	5.8	4.2	4.5	2.5	0.5	1	1	2	1	3	1			1	0	2					0	0	0	0	Col mop	88.3573	0	9.81748	29.4524	49.0874	68.7223	88.3573	107.992	206.167	265.072	323.977	461.421	0	9.81748	29.4524	49.0874	68.7223	88.3573	88.3573	88.3573
1			0.7					0	0		#DIV/0!	2	1	3	0			1	0	1					0	0	0	0	Col mop	#DIV/0!	#DIV/0!	#DIV/0!	#DIV/0!	#DIV/0!	#DIV/0!	#DIV/0!	#DIV/0!	#DIV/0!	#DIV/0!	#DIV/0!	#DIV/0!	#DIV/0!	#DIV/0!	#DIV/0!	#DIV/0!	#DIV/0!	#DIV/0!	#DIV/0!	#DIV/0!
1			0.75					0	0		#DIV/0!	1	1	3	0			1	0	1					0	0	0	0	Col mop	#DIV/0!	#DIV/0!	#DIV/0!	#DIV/0!	#DIV/0!	#DIV/0!	#DIV/0!	#DIV/0!	#DIV/0!	#DIV/0!	#DIV/0!	#DIV/0!	#DIV/0!	#DIV/0!	#DIV/0!	#DIV/0!	#DIV/0!	#DIV/0!	#DIV/0!	#DIV/0!
1			0.38					0	0		#DIV/0!	1	1	4	0			1	0	2					0	0	0	0	Col mop	#DIV/0!	#DIV/0!	#DIV/0!	#DIV/0!	#DIV/0!	#DIV/0!	#DIV/0!	#DIV/0!	#DIV/0!	#DIV/0!	#DIV/0!	#DIV/0!	#DIV/0!	#DIV/0!	#DIV/0!	#DIV/0!	#DIV/0!	#DIV/0!	#DIV/0!	#DIV/0!
1			0.4					0	0		#DIV/0!	1	1	2	0			1	0	2					0	0	0	0	Col mop	#DIV/0!	#DIV/0!	#DIV/0!	#DIV/0!	#DIV/0!	#DIV/0!	#DIV/0!	#DIV/0!	#DIV/0!	#DIV/0!	#DIV/0!	#DIV/0!	#DIV/0!	#DIV/0!	#DIV/0!	#DIV/0!	#DIV/0!	#DIV/0!	#DIV/0!	#DIV/0!
1			0.4					0	0		#DIV/0!	1	1	2	0			1	0	1					0	0	0	0	Col mop	#DIV/0!	#DIV/0!	#DIV/0!	#DIV/0!	#DIV/0!	#DIV/0!	#DIV/0!	#DIV/0!	#DIV/0!	#DIV/0!	#DIV/0!	#DIV/0!	#DIV/0!	#DIV/0!	#DIV/0!	#DIV/0!	#DIV/0!	#DIV/0!	#DIV/0!	#DIV/0!
1			0.5					0	0		#DIV/0!	1	1	2	0			1	0	1					0	0	0	0	Col mop	#DIV/0!	#DIV/0!	#DIV/0!	#DIV/0!	#DIV/0!	#DIV/0!	#DIV/0!	#DIV/0!	#DIV/0!	#DIV/0!	#DIV/0!	#DIV/0!	#DIV/0!	#DIV/0!	#DIV/0!	#DIV/0!	#DIV/0!	#DIV/0!	#DIV/0!	#DIV/0!
1			0.37					0	0		#DIV/0!	2	1	2	0			1	0	1					0	0	0	0	Col mop	#DIV/0!	#DIV/0!	#DIV/0!	#DIV/0!	#DIV/0!	#DIV/0!	#DIV/0!	#DIV/0!	#DIV/0!	#DIV/0!	#DIV/0!	#DIV/0!	#DIV/0!	#DIV/0!	#DIV/0!	#DIV/0!	#DIV/0!	#DIV/0!	#DIV/0!	#DIV/0!
1		Col mop	0.47					0	0		#DIV/0!	2	1	5	1			1	0	2					0	0	0	0	Col mop	#DIV/0!	#DIV/0!	#DIV/0!	#DIV/0!	#DIV/0!	#DIV/0!	#DIV/0!	#DIV/0!	#DIV/0!	#DIV/0!	#DIV/0!	#DIV/0!	#DIV/0!	#DIV/0!	#DIV/0!	#DIV/0!	#DIV/0!	#DIV/0!	#DIV/0!	#DIV/0!
1			0.26					0	0		#DIV/0!	2	1	5	0			1	0	1					0	0	0	0	Col mop	#DIV/0!	#DIV/0!	#DIV/0!	#DIV/0!	#DIV/0!	#DIV/0!	#DIV/0!	#DIV/0!	#DIV/0!	#DIV/0!	#DIV/0!	#DIV/0!	#DIV/0!	#DIV/0!	#DIV/0!	#DIV/0!	#DIV/0!	#DIV/0!	#DIV/0!	#DIV/0!
1	1	Col mop	0.93	4	3.79	4.5	3.5	2.0725	0.5	1	1	2	1	4	1			1	0	2					0	0	0	0	Col mop	47.2288	0	6.74697	20.2409	33.7349	47.2288	60.7228	74.2167	141.686	182.168	222.65	317.108	0	6.74697	20.2409	33.7349	47.2288	47.2288	47.2288	47.2288
1	1	Col mop	0.5	3.5	3.05	3.1	2.5	1.5375	1	1	1	2	1	5	1			1	0	2					0	0	0	0	Col mop	18.5661	-3.71322	0	7.42643	14.8529	22.2793	29.7057	37.1322	74.2643	96.5436	118.823	170.808	0	0	7.42643	14.8529	18.5661	18.5661	18.5661	18.5661
1	1	Col mop	0.26	3.8	2.6	2.65	3.3	1.3125	0.5	1	1	1	1	4	1			1	0	2					0	0	0	0	Col mop	17.8592	0	2.70594	8.11783	13.5297	18.9416	24.3535	29.7654	56.8248	73.0604	89.2961	127.179	0	2.70594	8.11783	13.5297	17.8592	17.8592	17.8592	17.8592
1			0.29					0	0		#DIV/0!	1	1	3	0			1	0	2					0	0	0	0	Col mop	#DIV/0!	#DIV/0!	#DIV/0!	#DIV/0!	#DIV/0!	#DIV/0!	#DIV/0!	#DIV/0!	#DIV/0!	#DIV/0!	#DIV/0!	#DIV/0!	#DIV/0!	#DIV/0!	#DIV/0!	#DIV/0!	#DIV/0!	#DIV/0!	#DIV/0!	#DIV/0!
1			0.22					0	0		#DIV/0!	1	1	2	0			1	0	2					0	0	0	0	Col mop	#DIV/0!	#DIV/0!	#DIV/0!	#DIV/0!	#DIV/0!	#DIV/0!	#DIV/0!	#DIV/0!	#DIV/0!	#DIV/0!	#DIV/0!	#DIV/0!	#DIV/0!	#DIV/0!	#DIV/0!	#DIV/0!	#DIV/0!	#DIV/0!	#DIV/0!	#DIV/0!
1			0.25					0	0		#DIV/0!	1	1	2	0			1	0	1					0	0	0	0	Col mop	#DIV/0!	#DIV/0!	#DIV/0!	#DIV/0!	#DIV/0!	#DIV/0!	#DIV/0!	#DIV/0!	#DIV/0!	#DIV/0!	#DIV/0!	#DIV/0!	#DIV/0!	#DIV/0!	#DIV/0!	#DIV/0!	#DIV/0!	#DIV/0!	#DIV/0!	#DIV/0!
1			0.11					0	0		#DIV/0!	1	0	1	0										0	0	0	0	Col mop	#DIV/0!	#DIV/0!	#DIV/0!	#DIV/0!	#DIV/0!	#DIV/0!	#DIV/0!	#DIV/0!	#DIV/0!	#DIV/0!	#DIV/0!	#DIV/0!	#DIV/0!	#DIV/0!	#DIV/0!	#DIV/0!	#DIV/0!	#DIV/0!	#DIV/0!	#DIV/0!
1	1	Col mop	1.05	4.2	4.2	3.8	3.2	2	1	1	1	2	1	5	1			1	0	2					0	0	0	0	Col mop	40.2124	-6.28319	0	12.5664	25.1327	37.6991	50.2655	62.8319	125.664	163.363	201.062	289.027	0	0	12.5664	25.1327	37.6991	40.2124	40.2124	40.2124
1			0.27					0	0		#DIV/0!	1	1	2	0			1	0	2					0	0	0	0	Col mop	#DIV/0!	#DIV/0!	#DIV/0!	#DIV/0!	#DIV/0!	#DIV/0!	#DIV/0!	#DIV/0!	#DIV/0!	#DIV/0!	#DIV/0!	#DIV/0!	#DIV/0!	#DIV/0!	#DIV/0!	#DIV/0!	#DIV/0!	#DIV/0!	#DIV/0!	#DIV/0!
1			0.44					0	0		#DIV/0!	2	1	4	0			1	0	2					0	0	0	0	Col mop	#DIV/0!	#DIV/0!	#DIV/0!	#DIV/0!	#DIV/0!	#DIV/0!	#DIV/0!	#DIV/0!	#DIV/0!	#DIV/0!	#DIV/0!	#DIV/0!	#DIV/0!	#DIV/0!	#DIV/0!	#DIV/0!	#DIV/0!	#DIV/0!	#DIV/0!	#DIV/0!
1			0.16					0	0		#DIV/0!				0	7									0	0	0	0	Col mop	#DIV/0!	#DIV/0!	#DIV/0!	#DIV/0!	#DIV/0!	#DIV/0!	#DIV/0!	#DIV/0!	#DIV/0!	#DIV/0!	#DIV/0!	#DIV/0!	#DIV/0!	#DIV/0!	#DIV/0!	#DIV/0!	#DIV/0!	#DIV/0!	#DIV/0!	#DIV/0!
1	1	Col mop	1.1	4	4.75	6.55	4	2.825	0	1	1	2	1	5	1			1	0	2					0	0	0	0	Col mop	100.287	12.5359	25.0719	50.1437	75.2156	100.287	125.359	150.431	275.791	351.006	426.222	601.725	12.5359	25.0719	50.1437	75.2156	100.287	100.287	100.287	100.287
1			0.5					0	0		#DIV/0!	2	1	5	0			1	0	2					0	0	0	0	Col mop	#DIV/0!	#DIV/0!	#DIV/0!	#DIV/0!	#DIV/0!	#DIV/0!	#DIV/0!	#DIV/0!	#DIV/0!	#DIV/0!	#DIV/0!	#DIV/0!	#DIV/0!	#DIV/0!	#DIV/0!	#DIV/0!	#DIV/0!	#DIV/0!	#DIV/0!	#DIV/0!
1			0.7					0	0		#DIV/0!	2	0	7	0										0	0	0	0	Col mop	#DIV/0!	#DIV/0!	#DIV/0!	#DIV/0!	#DIV/0!	#DIV/0!	#DIV/0!	#DIV/0!	#DIV/0!	#DIV/0!	#DIV/0!	#DIV/0!	#DIV/0!	#DIV/0!	#DIV/0!	#DIV/0!	#DIV/0!	#DIV/0!	#DIV/0!	#DIV/0!
1			0.64					0	0		#DIV/0!	2	1	4	0			1	0	2					0	0	0	0	Col mop	#DIV/0!	#DIV/0!	#DIV/0!	#DIV/0!	#DIV/0!	#DIV/0!	#DIV/0!	#DIV/0!	#DIV/0!	#DIV/0!	#DIV/0!	#DIV/0!	#DIV/0!	#DIV/0!	#DIV/0!	#DIV/0!	#DIV/0!	#DIV/0!	#DIV/0!	#DIV/0!
1			0.25					0	0		#DIV/0!	1	1	2	0			1	0	1					0	0	0	0	Col mop	#DIV/0!	#DIV/0!	#DIV/0!	#DIV/0!	#DIV/0!	#DIV/0!	#DIV/0!	#DIV/0!	#DIV/0!	#DIV/0!	#DIV/0!	#DIV/0!	#DIV/0!	#DIV/0!	#DIV/0!	#DIV/0!	#DIV/0!	#DIV/0!	#DIV/0!	#DIV/0!
1	1	Col mop	0.45	3.9	2.3	2.75	3.4	1.2625	0.5	1	1	1	1	2	1			1	0	1					0	0	0	0	Col mop	17.0252	0	2.5037	7.51111	12.5185	17.5259	22.5333	27.5407	52.5777	67.6	82.6222	117.674	0	2.5037	7.51111	12.5185	17.0252	17.0252	17.0252	17.0252
1			0.2					0	0		#DIV/0!	1	1	2	0			1	0	1					0	0	0	0	Col mop	#DIV/0!	#DIV/0!	#DIV/0!	#DIV/0!	#DIV/0!	#DIV/0!	#DIV/0!	#DIV/0!	#DIV/0!	#DIV/0!	#DIV/0!	#DIV/0!	#DIV/0!	#DIV/0!	#DIV/0!	#DIV/0!	#DIV/0!	#DIV/0!	#DIV/0!	#DIV/0!
1			0.18					0	0		#DIV/0!	1	1	3	0			1	0	1					0	0	0	0	Col mop	#DIV/0!	#DIV/0!	#DIV/0!	#DIV/0!	#DIV/0!	#DIV/0!	#DIV/0!	#DIV/0!	#DIV/0!	#DIV/0!	#DIV/0!	#DIV/0!	#DIV/0!	#DIV/0!	#DIV/0!	#DIV/0!	#DIV/0!	#DIV/0!	#DIV/0!	#DIV/0!
1	1	Col mop	0.58	4.2	3.7	3.4	3.2	1.775	1	3	3	2	1	5	1			1	0	2					0	0	0	0	Col mop	10.5473	-5.75678	0	7.11993	9.99108	10.5447	10.7121	12.4245	111.756	313.496	685.574	2509.09	0	0	7.11993	9.99108	10.5447	10.5473	10.5473	10.5473
1	1	Col mop	1	4.2	3.7	4.25	4.2	1.9875	0	1	1	2	1	3	1			1	0	2					0	0	0	0	Col mop	52.1211	6.20489	12.4098	24.8196	37.2293	49.6391	62.0489	74.4587	136.508	173.737	210.966	297.835	6.20489	12.4098	24.8196	37.2293	49.6391	52.1211	52.1211	52.1211
1	1	Col mop	0.62	4.3	5.6	4.3	4.3	2.475	0	1	1	2	1	4	1			1	0	2					0	0	0	0	Col mop	82.7501	9.62211	19.2442	38.4884	57.7327	76.9769	96.2211	115.465	211.686	269.419	327.152	461.861	9.62211	19.2442	38.4884	57.7327	76.9769	82.7501	82.7501	82.7501
1			0.31					0	0		#DIV/0!	1	1	3	0			1	0	1					0	0	0	0	Col mop	#DIV/0!	#DIV/0!	#DIV/0!	#DIV/0!	#DIV/0!	#DIV/0!	#DIV/0!	#DIV/0!	#DIV/0!	#DIV/0!	#DIV/0!	#DIV/0!	#DIV/0!	#DIV/0!	#DIV/0!	#DIV/0!	#DIV/0!	#DIV/0!	#DIV/0!	#DIV/0!
1			0.37					0	0		#DIV/0!	1	1	3	0			1	0	2					0	0	0	0	Col mop	#DIV/0!	#DIV/0!	#DIV/0!	#DIV/0!	#DIV/0!	#DIV/0!	#DIV/0!	#DIV/0!	#DIV/0!	#DIV/0!	#DIV/0!	#DIV/0!	#DIV/0!	#DIV/0!	#DIV/0!	#DIV/0!	#DIV/0!	#DIV/0!	#DIV/0!	#DIV/0!
1			0.5					0	0		#DIV/0!	2	1	3	0			1	0	2					0	0	0	0	Col mop	#DIV/0!	#DIV/0!	#DIV/0!	#DIV/0!	#DIV/0!	#DIV/0!	#DIV/0!	#DIV/0!	#DIV/0!	#DIV/0!	#DIV/0!	#DIV/0!	#DIV/0!	#DIV/0!	#DIV/0!	#DIV/0!	#DIV/0!	#DIV/0!	#DIV/0!	#DIV/0!
1	1	Col mop	0.6	3.5	4.5	4.7	3.5	2.3	0	1	1	2	1	5	1			1	0	2					0	0	0	0	Col mop	58.1666	8.30951	16.619	33.2381	49.8571	66.4761	83.0951	99.7142	182.809	232.666	282.523	398.857	8.30951	16.619	33.2381	49.8571	58.1666	58.1666	58.1666	58.1666
1			0.5					0	0		#DIV/0!	2	1	5	0			1	0	2					0	0	0	0	Col mop	#DIV/0!	#DIV/0!	#DIV/0!	#DIV/0!	#DIV/0!	#DIV/0!	#DIV/0!	#DIV/0!	#DIV/0!	#DIV/0!	#DIV/0!	#DIV/0!	#DIV/0!	#DIV/0!	#DIV/0!	#DIV/0!	#DIV/0!	#DIV/0!	#DIV/0!	#DIV/0!
1	1	Col mop	0.58	4	3.5	2.9	4	1.6	0	1	1	1	1	2	1			1	0	1					0	0	0	0	Col mop	32.1699	4.02124	8.04248	16.085	24.1274	32.1699	40.2124	48.2549	88.4672	112.595	136.722	193.019	4.02124	8.04248	16.085	24.1274	32.1699	32.1699	32.1699	32.1699
1			0.28					0	0		#DIV/0!	1	1	3	0			1	0	1					0	0	0	0	Col mop	#DIV/0!	#DIV/0!	#DIV/0!	#DIV/0!	#DIV/0!	#DIV/0!	#DIV/0!	#DIV/0!	#DIV/0!	#DIV/0!	#DIV/0!	#DIV/0!	#DIV/0!	#DIV/0!	#DIV/0!	#DIV/0!	#DIV/0!	#DIV/0!	#DIV/0!	#DIV/0!
1			0.25					0	0		#DIV/0!	2	1	4	0			1	0	1					0	0	0	0	Col mop	#DIV/0!	#DIV/0!	#DIV/0!	#DIV/0!	#DIV/0!	#DIV/0!	#DIV/0!	#DIV/0!	#DIV/0!	#DIV/0!	#DIV/0!	#DIV/0!	#DIV/0!	#DIV/0!	#DIV/0!	#DIV/0!	#DIV/0!	#DIV/0!	#DIV/0!	#DIV/0!
1			0.3					0	0		#DIV/0!	1	1	2	0			1	0	1					0	0	0	0	Col mop	#DIV/0!	#DIV/0!	#DIV/0!	#DIV/0!	#DIV/0!	#DIV/0!	#DIV/0!	#DIV/0!	#DIV/0!	#DIV/0!	#DIV/0!	#DIV/0!	#DIV/0!	#DIV/0!	#DIV/0!	#DIV/0!	#DIV/0!	#DIV/0!	#DIV/0!	#DIV/0!
1	1	Col mop	0.3	4.3	3.5	3.45	3.8	1.7375	0.5	1	1	1	1	3	1			1	0	1					0	0	0	0	Col mop	36.0399	0	4.74209	14.2263	23.7104	33.1946	42.6788	52.163	99.5838	128.036	156.489	222.878	0	4.74209	14.2263	23.7104	33.1946	36.0399	36.0399	36.0399
1			0.23					0	0		#DIV/0!	1	1	3	0			1	0	1					0	0	0	0	Col mop	#DIV/0!	#DIV/0!	#DIV/0!	#DIV/0!	#DIV/0!	#DIV/0!	#DIV/0!	#DIV/0!	#DIV/0!	#DIV/0!	#DIV/0!	#DIV/0!	#DIV/0!	#DIV/0!	#DIV/0!	#DIV/0!	#DIV/0!	#DIV/0!	#DIV/0!	#DIV/0!
1			0.28					0	0		#DIV/0!	1	1	3	0			1	0	1					0	0	0	0	Col mop	#DIV/0!	#DIV/0!	#DIV/0!	#DIV/0!	#DIV/0!	#DIV/0!	#DIV/0!	#DIV/0!	#DIV/0!	#DIV/0!	#DIV/0!	#DIV/0!	#DIV/0!	#DIV/0!	#DIV/0!	#DIV/0!	#DIV/0!	#DIV/0!	#DIV/0!	#DIV/0!
1			0.26					0	0		#DIV/0!	1	1	4	0										0	0	0	0	Col mop	#DIV/0!	#DIV/0!	#DIV/0!	#DIV/0!	#DIV/0!	#DIV/0!	#DIV/0!	#DIV/0!	#DIV/0!	#DIV/0!	#DIV/0!	#DIV/0!	#DIV/0!	#DIV/0!	#DIV/0!	#DIV/0!	#DIV/0!	#DIV/0!	#DIV/0!	#DIV/0!
1	1	Col mop	0.78	4.7	4.1	3.35	4.7	1.8625	0	3	3	2	1	5	1			1	0	2					0	0	0	0	Col mop	17.0563	4.88494	8.73489	13.8227	16.2492	16.9999	17.0607	17.4172	58.1346	149.198	322.764	1198.09	4.88494	8.73489	13.8227	16.2492	16.9999	17.0563	17.0563	17.0563
1			0.95					0	0		#DIV/0!	2	1	5	0			1	0	3					0	0	0	0	Col mop	#DIV/0!	#DIV/0!	#DIV/0!	#DIV/0!	#DIV/0!	#DIV/0!	#DIV/0!	#DIV/0!	#DIV/0!	#DIV/0!	#DIV/0!	#DIV/0!	#DIV/0!	#DIV/0!	#DIV/0!	#DIV/0!	#DIV/0!	#DIV/0!	#DIV/0!	#DIV/0!
1	1	Col mop	1	4.1	5.5	5.2	4.1	2.675	0	1	1	2	1	5	1			1	0	2					0	0	0	0	Col mop	92.1682	11.24	22.4801	44.9601	67.4402	89.9202	112.4	134.88	247.281	314.721	382.161	539.521	11.24	22.4801	44.9601	67.4402	89.9202	92.1682	92.1682	92.1682
1			1					0	0		#DIV/0!	2	1	5	0			1	0	2					0	0	0	0	Col mop	#DIV/0!	#DIV/0!	#DIV/0!	#DIV/0!	#DIV/0!	#DIV/0!	#DIV/0!	#DIV/0!	#DIV/0!	#DIV/0!	#DIV/0!	#DIV/0!	#DIV/0!	#DIV/0!	#DIV/0!	#DIV/0!	#DIV/0!	#DIV/0!	#DIV/0!	#DIV/0!
1	1	Col mop	1.1	3.7	3	2.8	3.7	1.45	0	3	3	2	1	5	1			1	0	2					0	0	0	0	Col mop	8.13827	2.87353	4.97586	7.34891	8.08316	8.1426	8.49125	10.0931	70.6405	183.703	386.129	1352.19	2.87353	4.97586	7.34891	8.08316	8.13827	8.13827	8.13827	8.13827
1	1	Col mop	0.9	4.2	3.45	3.6	3.7	1.7625	0.5	2	2	2	1	5	1			1	0	2					0	0	0	0	Col mop	12.0241	0	0.0296728	0.801166	3.7091	10.1778	21.6315	39.4945	274.8	584.05	1066.35	5.86242e+08	0	0.0296728	0.801166	3.7091	10.1778	12.0241	12.0241	12.0241
1			0.8					0	0		#DIV/0!	2	0	7	0										0	0	0	0	Col mop	#DIV/0!	#DIV/0!	#DIV/0!	#DIV/0!	#DIV/0!	#DIV/0!	#DIV/0!	#DIV/0!	#DIV/0!	#DIV/0!	#DIV/0!	#DIV/0!	#DIV/0!	#DIV/0!	#DIV/0!	#DIV/0!	#DIV/0!	#DIV/0!	#DIV/0!	#DIV/0!
1	1	Col mop	0.8	4.5	3.4	3.2	4	1.65	0.5	1	1	2	1	5	1			1	0	2					0	63	0	0	Col mop	34.2119	0	4.27649	12.8295	21.3825	29.9355	38.4884	47.0414	89.8064	115.465	141.124	200.995	0	4.27649	12.8295	21.3825	29.9355	34.2119	34.2119	34.2119
1	1	Col mop	0.4	3.1	2.6	2.5	2.1	1.275	1	1	1	1	1	3	1			1	0	2					0	0	0	0	Col mop	10.7248	-2.55353	0	5.10705	10.2141	15.3212	20.4282	25.5353	51.0705	66.3917	81.7128	117.462	0	0	5.10705	10.2141	10.7248	10.7248	10.7248	10.7248
1			0.43					0	0		#DIV/0!	1	1	3	0			1	0	1					0	0	0	0	Col mop	#DIV/0!	#DIV/0!	#DIV/0!	#DIV/0!	#DIV/0!	#DIV/0!	#DIV/0!	#DIV/0!	#DIV/0!	#DIV/0!	#DIV/0!	#DIV/0!	#DIV/0!	#DIV/0!	#DIV/0!	#DIV/0!	#DIV/0!	#DIV/0!	#DIV/0!	#DIV/0!
1	1	Col mop	1.45	16.3	5.8	6.2	11.3	3	5	3	3			4	1			1	0	1					63	0	5.5	0	Col mop	106.393	-184.444	-157.698	-109.226	-67.0806	-30.8194	1.6725e-14	25.8201	95.4159	105.496	106.419	140.056	0	0	0	0	0	0	25.8201	95.4159
2	1	Col mopA	1.82	13.8	8.8	6.9	12.8	3.925	1	3	3	1	0	1	1	2		1	0	1					38	0	5.5	0	Col mopA	206.292	-25.1315	0	44.6708	82.3772	113.709	139.257	159.612	204.133	206.293	209.516	310.681	0	0	44.6708	82.3772	113.709	139.257	159.612	204.133
2	1	Col mopA	1.2	17.5	9.8	10.7	17	5.125	0.5	7	7	1	0	1	1	2									63	0	0	0	Col mopA	1261.52	0	41.2579	123.774	206.29	288.806	371.322	453.837	866.417	1109.34	1257.63	294.652	0	41.2579	123.774	206.29	288.806	371.322	453.837	866.417
2			0.68					0	0		#DIV/0!	1	1	3	0			1	0	1					0	0	0	0	Col mopA	#DIV/0!	#DIV/0!	#DIV/0!	#DIV/0!	#DIV/0!	#DIV/0!	#DIV/0!	#DIV/0!	#DIV/0!	#DIV/0!	#DIV/0!	#DIV/0!	#DIV/0!	#DIV/0!	#DIV/0!	#DIV/0!	#DIV/0!	#DIV/0!	#DIV/0!	#DIV/0!
2			0.9					0	0		#DIV/0!	1	0	2	0										0	18	0	0	Col mopA	#DIV/0!	#DIV/0!	#DIV/0!	#DIV/0!	#DIV/0!	#DIV/0!	#DIV/0!	#DIV/0!	#DIV/0!	#DIV/0!	#DIV/0!	#DIV/0!	#DIV/0!	#DIV/0!	#DIV/0!	#DIV/0!	#DIV/0!	#DIV/0!	#DIV/0!	#DIV/0!
2			1.3					0	0		#DIV/0!	1	0	1	0	2		1	0	1					38	0	5.5	0	Col mopA	#DIV/0!	#DIV/0!	#DIV/0!	#DIV/0!	#DIV/0!	#DIV/0!	#DIV/0!	#DIV/0!	#DIV/0!	#DIV/0!	#DIV/0!	#DIV/0!	#DIV/0!	#DIV/0!	#DIV/0!	#DIV/0!	#DIV/0!	#DIV/0!	#DIV/0!	#DIV/0!
2			0.9					0	0		#DIV/0!	1	0	3	0	1									0	0	0	0	Col mopA	#DIV/0!	#DIV/0!	#DIV/0!	#DIV/0!	#DIV/0!	#DIV/0!	#DIV/0!	#DIV/0!	#DIV/0!	#DIV/0!	#DIV/0!	#DIV/0!	#DIV/0!	#DIV/0!	#DIV/0!	#DIV/0!	#DIV/0!	#DIV/0!	#DIV/0!	#DIV/0!
2			1					0	0		#DIV/0!	1	1	2	0			1	0	1					0	0	0	0	Col mopA	#DIV/0!	#DIV/0!	#DIV/0!	#DIV/0!	#DIV/0!	#DIV/0!	#DIV/0!	#DIV/0!	#DIV/0!	#DIV/0!	#DIV/0!	#DIV/0!	#DIV/0!	#DIV/0!	#DIV/0!	#DIV/0!	#DIV/0!	#DIV/0!	#DIV/0!	#DIV/0!
2	1	Col mopA	2.18	14.7	8.1	8.35	14.7	4.1125	0	3	3	1	0	2	1			1	0	1					18	0	5.5	0	Col mopA	260.09	25.6473	49.5506	92.3707	128.952	159.785	185.361	206.172	255.942	260.062	261.086	325.95	25.6473	49.5506	92.3707	128.952	159.785	185.361	206.172	255.942
2			1					0	0		#DIV/0!	2	1	3	0			1	0	1					0	0	0	0	Col mopA	#DIV/0!	#DIV/0!	#DIV/0!	#DIV/0!	#DIV/0!	#DIV/0!	#DIV/0!	#DIV/0!	#DIV/0!	#DIV/0!	#DIV/0!	#DIV/0!	#DIV/0!	#DIV/0!	#DIV/0!	#DIV/0!	#DIV/0!	#DIV/0!	#DIV/0!	#DIV/0!
2	1	Col mopA	1.5	14.5	8.05	8.55	13.5	4.15	1	3	3	1	0	1	1	1		1	0	1					38	0	0	0	Col mopA	243.234	-28.0393	3.20052e-14	50.147	92.8794	128.791	158.473	182.521	238.995	243.222	244.779	327.994	0	0	50.147	92.8794	128.791	158.473	182.521	238.995
2	1	Col mopA	1.75	16.4	5.5	8.15	16.4	3.4125	0	3	3			3	1			1	0	1					63	0	18	0	Col mopA	199.794	17.7224	34.3645	64.5438	90.8095	113.434	132.688	148.843	192.662	199.168	199.804	219.678	17.7224	34.3645	64.5438	90.8095	113.434	132.688	148.843	192.662
2	1	Col mopA	2.15	16.5	6.2	7.2	15.5	3.35	1	3	3	1	1	3	1			1	0	2					63	0	5.5	0	Col mopA	181.977	-18.1848	-2.08552e-14	32.9978	61.7441	86.5322	107.655	125.406	173.846	181.213	181.983	202.593	0	0	32.9978	61.7441	86.5322	107.655	125.406	173.846
2	1	Col mopA	2.82	16	8.8	8.9	15	4.425	1	3	3	1	1	2	1	2		1	0	1					38	0	5.5	0	Col mopA	307.264	-31.762	0	57.447	107.247	149.945	186.088	216.223	295.884	306.536	307.355	353.877	0	0	57.447	107.247	149.945	186.088	216.223	295.884
															0
															0
															0
															0
															0
															0
															0
															0
															0
															0
															0
															0
															0
															0
															0
															0
															0
															0
															0
															0
															0
															0
															0
															0
															0
															0
															0
															0
															0
															0
															0
															0
															0
															0
															0
															0
															0
															0
															0
															0
															0
															0
															0
															0
															0
															0
															0
															0
															0
															0
															0
															0
															0
															0
															0
															0
															0
															0
															0
															0
															0
															0
															0
															0
															0
															0
															0
															0
															0
															0
															0
															0
															0
															0
															0
															0
															0
															0
															0
															0
															0
															0
															0
															0
															0
															0
															0
															0
															0
															0
															0
															0
															0
															0
															0
															0
															0
															0
															0
															0
															0
															0
															0
															0
															0
															0
															0
															0
															0
															0
															0
															0
															0
															0
															0
															0
															0
															0
															0
															0
															0
															0
															0
															0
															0
															0
															0
															0
															0
															0
															0
															0
															0
															0
															0
															0
															0
															0
															0
															0
															0
															0
															0
															0
															0
															0
															0
															0
															0
															0
															0
															0
															0
															0
															0
															0
															0
															0
															0
															0
															0
															0
															0
															0
															0
															0
															0
															0
															0
															0
															0
															0
															0
															0
															0
															0
															0
															0
															0
															0
															0
															0
															0
															0
															0
															0
															0
															0
															0
															0
															0
															0
															0
															0
															0
															0
															0
															0
															0
															0
															0
															0
															0
															0
															0
															0
															0
															0
															0
															0
															0
															0
															0
															0
															0
															0
															0
															0
															0
															0
															0
															0
															0
															0
															0
															0
															0
															0
															0
															0
															0
															0
															0
															0
															0
															0
															0
															0
															0
															0
															0
															0
															0
															0
															0
															0
															0
															0
															0
															0
															0
[truncated: 68 more columns]

## Sheet: Site3
Date:	20/8/2014														Tree density ≤ 10m (no/ha)	104
Trans. No.:	GNP4														Tree density > 10m (no/ha)	4
												Transect 2 for Tall Trees (GPS coordinates)			Tree height (m)	4.44074
			Width (m)	Length (m)	Area (ha)							Initial	Extension	Total area (ha)	Lower level of canopy (m)	#REF!
	Transect Dimensions:		50	50	0.25							2389.89	23070.9	2.54608
	Co-ordinates:			X	Y								X	Y
			NW Corner									NW Corner
			SW Corner									SW Corner
			NE Corner									NE Corner					# main stems broken	43
			SE Corner									SE Corner
	27		Max									43						0
			3.6	23.3								OED				OUD	DRT	NED				NUD	NFD	OFD	OBE	OBU	NBE	NBU	RE	Canopy volume (m3) up to specified height class	Height classes (m)
Trans. No.	Tree	Sp. Code	Stem Circum.(cm)	Height (m)	D1 (m)	D2 (m)	CD (m)	R	Y	Shape	Adj. Shape	F	C	S	Tree			F	C	S	E									Total	0.5	1	2	3	4	5	6	11	14	17	24	0.5	1	2	3	4	5	6	11
1		Col mop	1.4					0	0		#DIV/0!	2	0	7	1										0	0	0	0	Col mop	#DIV/0!	#DIV/0!	#DIV/0!	#DIV/0!	#DIV/0!	#DIV/0!	#DIV/0!	#DIV/0!	#DIV/0!	#DIV/0!	#DIV/0!	#DIV/0!	#DIV/0!	#DIV/0!	#DIV/0!	#DIV/0!	#DIV/0!	#DIV/0!	#DIV/0!	#DIV/0!
1		Col mop	0.65					0	0		#DIV/0!	2	0	7	1										0	0	0	0	Col mop	#DIV/0!	#DIV/0!	#DIV/0!	#DIV/0!	#DIV/0!	#DIV/0!	#DIV/0!	#DIV/0!	#DIV/0!	#DIV/0!	#DIV/0!	#DIV/0!	#DIV/0!	#DIV/0!	#DIV/0!	#DIV/0!	#DIV/0!	#DIV/0!	#DIV/0!	#DIV/0!
1	1	Col mop	2.1	19.4	9.32	8.55	15.4	4.4675	4	3	3	1	0	2	1	1									38	0	0	0	Col mop	321.547	-272.838	-226.901	-142.252	-66.7945	1.11269e-13	58.6595	109.712	269.365	307.683	320.33	330.116	0	0	0	0	0	58.6595	109.712	269.365
1			1.2					0	0		#DIV/0!	2	1	6	0			1	0	1					0	0	0	0	Col mop	#DIV/0!	#DIV/0!	#DIV/0!	#DIV/0!	#DIV/0!	#DIV/0!	#DIV/0!	#DIV/0!	#DIV/0!	#DIV/0!	#DIV/0!	#DIV/0!	#DIV/0!	#DIV/0!	#DIV/0!	#DIV/0!	#DIV/0!	#DIV/0!	#DIV/0!	#DIV/0!
1	1	Col mop	0.5	4	3.9	3.55	4	1.8625	0	1	1	1	1	3	1			1	0	1					0	0	0	0	Col mop	43.5916	5.44895	10.8979	21.7958	32.6937	43.5916	54.4895	65.3873	119.877	152.57	185.264	261.549	5.44895	10.8979	21.7958	32.6937	43.5916	43.5916	43.5916	43.5916
1			0.27					0	0		#DIV/0!	1	1	3	0			1	0	1					0	0	0	0	Col mop	#DIV/0!	#DIV/0!	#DIV/0!	#DIV/0!	#DIV/0!	#DIV/0!	#DIV/0!	#DIV/0!	#DIV/0!	#DIV/0!	#DIV/0!	#DIV/0!	#DIV/0!	#DIV/0!	#DIV/0!	#DIV/0!	#DIV/0!	#DIV/0!	#DIV/0!	#DIV/0!
1			0.24					0	0		#DIV/0!	1	0	2	0			1	0	1					0	0	0	0	Col mop	#DIV/0!	#DIV/0!	#DIV/0!	#DIV/0!	#DIV/0!	#DIV/0!	#DIV/0!	#DIV/0!	#DIV/0!	#DIV/0!	#DIV/0!	#DIV/0!	#DIV/0!	#DIV/0!	#DIV/0!	#DIV/0!	#DIV/0!	#DIV/0!	#DIV/0!	#DIV/0!
1			0.46					0	0		#DIV/0!	1	0	2	0			1	0	1					0	0	0	0	Col mop	#DIV/0!	#DIV/0!	#DIV/0!	#DIV/0!	#DIV/0!	#DIV/0!	#DIV/0!	#DIV/0!	#DIV/0!	#DIV/0!	#DIV/0!	#DIV/0!	#DIV/0!	#DIV/0!	#DIV/0!	#DIV/0!	#DIV/0!	#DIV/0!	#DIV/0!	#DIV/0!
1			0.27					0	0		#DIV/0!	1	1	2	0			1	0	1					0	0	0	0	Col mop	#DIV/0!	#DIV/0!	#DIV/0!	#DIV/0!	#DIV/0!	#DIV/0!	#DIV/0!	#DIV/0!	#DIV/0!	#DIV/0!	#DIV/0!	#DIV/0!	#DIV/0!	#DIV/0!	#DIV/0!	#DIV/0!	#DIV/0!	#DIV/0!	#DIV/0!	#DIV/0!
1			0.29					0	0		#DIV/0!	1	0	3	0			1	0	1					0	0	0	0	Col mop	#DIV/0!	#DIV/0!	#DIV/0!	#DIV/0!	#DIV/0!	#DIV/0!	#DIV/0!	#DIV/0!	#DIV/0!	#DIV/0!	#DIV/0!	#DIV/0!	#DIV/0!	#DIV/0!	#DIV/0!	#DIV/0!	#DIV/0!	#DIV/0!	#DIV/0!	#DIV/0!
1			0.14					0	0		#DIV/0!	1	0	2	0			1	0	1					0	0	0	0	Col mop	#DIV/0!	#DIV/0!	#DIV/0!	#DIV/0!	#DIV/0!	#DIV/0!	#DIV/0!	#DIV/0!	#DIV/0!	#DIV/0!	#DIV/0!	#DIV/0!	#DIV/0!	#DIV/0!	#DIV/0!	#DIV/0!	#DIV/0!	#DIV/0!	#DIV/0!	#DIV/0!
1			0.14					0	0		#DIV/0!	1	1	4	0										0	0	0	0	Col mop	#DIV/0!	#DIV/0!	#DIV/0!	#DIV/0!	#DIV/0!	#DIV/0!	#DIV/0!	#DIV/0!	#DIV/0!	#DIV/0!	#DIV/0!	#DIV/0!	#DIV/0!	#DIV/0!	#DIV/0!	#DIV/0!	#DIV/0!	#DIV/0!	#DIV/0!	#DIV/0!
1	1	Col mop	0.3	3.5	2.5	1.75	3	1.0625	0.5	1	1	1	1	2	1			1	0	1					0	0	0	0	Col mop	10.6397	0	1.77328	5.31985	8.86641	12.413	15.9595	19.5061	37.2389	47.8786	58.5183	83.3442	0	1.77328	5.31985	8.86641	10.6397	10.6397	10.6397	10.6397
1			0.22					0	0		#DIV/0!	1	1	2	0			1	0	1					0	0	0	0	Col mop	#DIV/0!	#DIV/0!	#DIV/0!	#DIV/0!	#DIV/0!	#DIV/0!	#DIV/0!	#DIV/0!	#DIV/0!	#DIV/0!	#DIV/0!	#DIV/0!	#DIV/0!	#DIV/0!	#DIV/0!	#DIV/0!	#DIV/0!	#DIV/0!	#DIV/0!	#DIV/0!
1	1	Col mop	0.27	3.4	2.2	2.4	3.4	1.15	0	7	7	1	1	2	1			1	0	1					0	0	0	0	Col mop	12.5303	2.07738	4.15476	8.30951	12.0198	11.005	-0.994302	-30.2551	-655.173	-1638.98	-3286.58	-10664.3	2.07738	4.15476	8.30951	12.0198	12.5303	12.5303	12.5303	12.5303
1			0.33					0	0		#DIV/0!	1	0	2	0			1	0	1					0	0	0	0	Col mop	#DIV/0!	#DIV/0!	#DIV/0!	#DIV/0!	#DIV/0!	#DIV/0!	#DIV/0!	#DIV/0!	#DIV/0!	#DIV/0!	#DIV/0!	#DIV/0!	#DIV/0!	#DIV/0!	#DIV/0!	#DIV/0!	#DIV/0!	#DIV/0!	#DIV/0!	#DIV/0!
1			0.35					0	0		#DIV/0!	1	1	3	0			1	0	1					0	0	0	0	Col mop	#DIV/0!	#DIV/0!	#DIV/0!	#DIV/0!	#DIV/0!	#DIV/0!	#DIV/0!	#DIV/0!	#DIV/0!	#DIV/0!	#DIV/0!	#DIV/0!	#DIV/0!	#DIV/0!	#DIV/0!	#DIV/0!	#DIV/0!	#DIV/0!	#DIV/0!	#DIV/0!
1	1	Col mop	0.34	3.6	3.4	3.1	3.6	1.625	0	1	1	1	1	2	1			1	0	1					0	0	0	0	Col mop	29.8648	4.14788	8.29577	16.5915	24.8873	33.1831	41.4788	49.7746	91.2534	116.141	141.028	199.098	4.14788	8.29577	16.5915	24.8873	29.8648	29.8648	29.8648	29.8648
1			0.34					0	0		#DIV/0!	1	1	4	0			1	0	2					0	0	0	0	Col mop	#DIV/0!	#DIV/0!	#DIV/0!	#DIV/0!	#DIV/0!	#DIV/0!	#DIV/0!	#DIV/0!	#DIV/0!	#DIV/0!	#DIV/0!	#DIV/0!	#DIV/0!	#DIV/0!	#DIV/0!	#DIV/0!	#DIV/0!	#DIV/0!	#DIV/0!	#DIV/0!
1			0.18					0	0		#DIV/0!	1	0	2	0										0	0	0	0	Col mop	#DIV/0!	#DIV/0!	#DIV/0!	#DIV/0!	#DIV/0!	#DIV/0!	#DIV/0!	#DIV/0!	#DIV/0!	#DIV/0!	#DIV/0!	#DIV/0!	#DIV/0!	#DIV/0!	#DIV/0!	#DIV/0!	#DIV/0!	#DIV/0!	#DIV/0!	#DIV/0!
1			0.16					0	0		#DIV/0!	1	1	2	0			1	0	1					0	0	0	0	Col mop	#DIV/0!	#DIV/0!	#DIV/0!	#DIV/0!	#DIV/0!	#DIV/0!	#DIV/0!	#DIV/0!	#DIV/0!	#DIV/0!	#DIV/0!	#DIV/0!	#DIV/0!	#DIV/0!	#DIV/0!	#DIV/0!	#DIV/0!	#DIV/0!	#DIV/0!	#DIV/0!
1			0.1					0	0		#DIV/0!	1	1	3	0										0	0	0	0	Col mop	#DIV/0!	#DIV/0!	#DIV/0!	#DIV/0!	#DIV/0!	#DIV/0!	#DIV/0!	#DIV/0!	#DIV/0!	#DIV/0!	#DIV/0!	#DIV/0!	#DIV/0!	#DIV/0!	#DIV/0!	#DIV/0!	#DIV/0!	#DIV/0!	#DIV/0!	#DIV/0!
1			0.25					0	0		#DIV/0!	2	1	2	0			1	0	1					0	0	0	0	Col mop	#DIV/0!	#DIV/0!	#DIV/0!	#DIV/0!	#DIV/0!	#DIV/0!	#DIV/0!	#DIV/0!	#DIV/0!	#DIV/0!	#DIV/0!	#DIV/0!	#DIV/0!	#DIV/0!	#DIV/0!	#DIV/0!	#DIV/0!	#DIV/0!	#DIV/0!	#DIV/0!
1	1	Col mop	0.28	3.3	3.03	2.4	2.8	1.3575	0.5	1	1	1	1	3	1			1	0	1					0	0	0	0	Col mop	16.2102	0	2.89467	8.68402	14.4734	20.2627	26.0521	31.8414	60.7881	78.1562	95.5242	136.05	0	2.89467	8.68402	14.4734	16.2102	16.2102	16.2102	16.2102
1			0.23					0	0		#DIV/0!	1	1	3	0			1	0	1					0	0	0	0	Col mop	#DIV/0!	#DIV/0!	#DIV/0!	#DIV/0!	#DIV/0!	#DIV/0!	#DIV/0!	#DIV/0!	#DIV/0!	#DIV/0!	#DIV/0!	#DIV/0!	#DIV/0!	#DIV/0!	#DIV/0!	#DIV/0!	#DIV/0!	#DIV/0!	#DIV/0!	#DIV/0!
1			0.22					0	0		#DIV/0!	1	1	3	0			1	0	1					0	0	0	0	Col mop	#DIV/0!	#DIV/0!	#DIV/0!	#DIV/0!	#DIV/0!	#DIV/0!	#DIV/0!	#DIV/0!	#DIV/0!	#DIV/0!	#DIV/0!	#DIV/0!	#DIV/0!	#DIV/0!	#DIV/0!	#DIV/0!	#DIV/0!	#DIV/0!	#DIV/0!	#DIV/0!
1			0.22					0	0		#DIV/0!	1	1	1	0			1	0	1					0	0	0	0	Col mop	#DIV/0!	#DIV/0!	#DIV/0!	#DIV/0!	#DIV/0!	#DIV/0!	#DIV/0!	#DIV/0!	#DIV/0!	#DIV/0!	#DIV/0!	#DIV/0!	#DIV/0!	#DIV/0!	#DIV/0!	#DIV/0!	#DIV/0!	#DIV/0!	#DIV/0!	#DIV/0!
1			0.18					0	0		#DIV/0!	1	1	2	0			1	0	1					0	0	0	0	Col mop	#DIV/0!	#DIV/0!	#DIV/0!	#DIV/0!	#DIV/0!	#DIV/0!	#DIV/0!	#DIV/0!	#DIV/0!	#DIV/0!	#DIV/0!	#DIV/0!	#DIV/0!	#DIV/0!	#DIV/0!	#DIV/0!	#DIV/0!	#DIV/0!	#DIV/0!	#DIV/0!
1	1	Col mop	1.02	4	4	4.8	4	2.2	0	1	1	1	1	4	1			1	0	1					0	0	0	0	Col mop	60.8212	7.60265	15.2053	30.4106	45.6159	60.8212	76.0265	91.2319	167.258	212.874	258.49	364.927	7.60265	15.2053	30.4106	45.6159	60.8212	60.8212	60.8212	60.8212
1	1	Col mop	0.9	3.4	4.25	5.78	3.4	2.5075	0	1	1	2	1	2	1			1	0	1					0	0	0	0	Col mop	67.16	9.87647	19.7529	39.5059	59.2588	79.0118	98.7647	118.518	217.282	276.541	335.8	474.071	9.87647	19.7529	39.5059	59.2588	67.16	67.16	67.16	67.16
1			0.52					0	0		#DIV/0!	1	1	3	0			1	0	1					0	0	0	0	Col mop	#DIV/0!	#DIV/0!	#DIV/0!	#DIV/0!	#DIV/0!	#DIV/0!	#DIV/0!	#DIV/0!	#DIV/0!	#DIV/0!	#DIV/0!	#DIV/0!	#DIV/0!	#DIV/0!	#DIV/0!	#DIV/0!	#DIV/0!	#DIV/0!	#DIV/0!	#DIV/0!
1			0.2					0	0		#DIV/0!	1	1	1	0			1	0	1					0	0	0	0	Col mop	#DIV/0!	#DIV/0!	#DIV/0!	#DIV/0!	#DIV/0!	#DIV/0!	#DIV/0!	#DIV/0!	#DIV/0!	#DIV/0!	#DIV/0!	#DIV/0!	#DIV/0!	#DIV/0!	#DIV/0!	#DIV/0!	#DIV/0!	#DIV/0!	#DIV/0!	#DIV/0!
1	1	Col mop	1.05	3.4	3.75	3.7	2.9	1.8625	0.5	1	1	2	1	6	1			1	0	1					0	0	0	0	Col mop	31.6039	0	5.44895	16.3468	27.2447	38.1426	49.0405	59.9384	114.428	147.122	179.815	256.1	0	5.44895	16.3468	27.2447	31.6039	31.6039	31.6039	31.6039
1			0.59					0	0		#DIV/0!	1	1	3	0			1	0	2					0	0	0	0	Col mop	#DIV/0!	#DIV/0!	#DIV/0!	#DIV/0!	#DIV/0!	#DIV/0!	#DIV/0!	#DIV/0!	#DIV/0!	#DIV/0!	#DIV/0!	#DIV/0!	#DIV/0!	#DIV/0!	#DIV/0!	#DIV/0!	#DIV/0!	#DIV/0!	#DIV/0!	#DIV/0!
1			0.7					0	0		#DIV/0!	1	1	4	0			1	0	1					0	0	0	0	Col mop	#DIV/0!	#DIV/0!	#DIV/0!	#DIV/0!	#DIV/0!	#DIV/0!	#DIV/0!	#DIV/0!	#DIV/0!	#DIV/0!	#DIV/0!	#DIV/0!	#DIV/0!	#DIV/0!	#DIV/0!	#DIV/0!	#DIV/0!	#DIV/0!	#DIV/0!	#DIV/0!
1	1	Col mop	0.92	4.8	5.5	5.4	3.8	3.08333	1	6	7	2	1	6	1			1	0	1					0	0	0	0	Col mop	82.7364	-14.9335	0	29.8347	57.4844	77.0788	82.341	66.994	-538.57	-1550.94	-3257.22	-10889.1	0	0	29.8347	57.4844	77.0788	82.7364	82.7364	82.7364
1			0.75					0	0		#DIV/0!	2	1	3	0			1	0	1					0	0	0	0	Col mop	#DIV/0!	#DIV/0!	#DIV/0!	#DIV/0!	#DIV/0!	#DIV/0!	#DIV/0!	#DIV/0!	#DIV/0!	#DIV/0!	#DIV/0!	#DIV/0!	#DIV/0!	#DIV/0!	#DIV/0!	#DIV/0!	#DIV/0!	#DIV/0!	#DIV/0!	#DIV/0!
1			0.73					0	0		#DIV/0!	1	1	4	0			1	0	1					0	0	0	0	Col mop	#DIV/0!	#DIV/0!	#DIV/0!	#DIV/0!	#DIV/0!	#DIV/0!	#DIV/0!	#DIV/0!	#DIV/0!	#DIV/0!	#DIV/0!	#DIV/0!	#DIV/0!	#DIV/0!	#DIV/0!	#DIV/0!	#DIV/0!	#DIV/0!	#DIV/0!	#DIV/0!
1	1	Col mop	0.32	4.4	2.75	3.7	4.4	1.6125	0	7	7	1	1	2	1			1	0	1					0	0	0	0	Col mop	31.5426	4.08432	8.16863	16.3373	24.4941	30.7998	29.4947	14.302	-489.668	-1360.42	-2864.6	-9789.62	4.08432	8.16863	16.3373	24.4941	30.7998	31.5426	31.5426	31.5426
1			0.3					0	0		#DIV/0!	1	1	3	0			1	0	2					0	0	0	0	Col mop	#DIV/0!	#DIV/0!	#DIV/0!	#DIV/0!	#DIV/0!	#DIV/0!	#DIV/0!	#DIV/0!	#DIV/0!	#DIV/0!	#DIV/0!	#DIV/0!	#DIV/0!	#DIV/0!	#DIV/0!	#DIV/0!	#DIV/0!	#DIV/0!	#DIV/0!	#DIV/0!
1			0.34					0	0		#DIV/0!	1	1	3	0			1	0	1					0	0	0	0	Col mop	#DIV/0!	#DIV/0!	#DIV/0!	#DIV/0!	#DIV/0!	#DIV/0!	#DIV/0!	#DIV/0!	#DIV/0!	#DIV/0!	#DIV/0!	#DIV/0!	#DIV/0!	#DIV/0!	#DIV/0!	#DIV/0!	#DIV/0!	#DIV/0!	#DIV/0!	#DIV/0!
1			0.6					0	0		#DIV/0!	1	1	2	0			1	0	1					0	0	0	0	Col mop	#DIV/0!	#DIV/0!	#DIV/0!	#DIV/0!	#DIV/0!	#DIV/0!	#DIV/0!	#DIV/0!	#DIV/0!	#DIV/0!	#DIV/0!	#DIV/0!	#DIV/0!	#DIV/0!	#DIV/0!	#DIV/0!	#DIV/0!	#DIV/0!	#DIV/0!	#DIV/0!
1	1	Col mop	0.9	4.5	4	7.02	4	2.755	0.5	2	2	2	0	6	1			1	0	2					0	0	0	0	Col mop	31.7612	0	0.0620337	1.67491	7.75421	21.2775	45.2225	82.5668	574.494	1221.01	2229.3	#DIV/0!	0	0.0620337	1.67491	7.75421	21.2775	31.7612	31.7612	31.7612
1			1.37					0	0		#DIV/0!	2	1	4	0			1	0	2					0	0	0	0	Col mop	#DIV/0!	#DIV/0!	#DIV/0!	#DIV/0!	#DIV/0!	#DIV/0!	#DIV/0!	#DIV/0!	#DIV/0!	#DIV/0!	#DIV/0!	#DIV/0!	#DIV/0!	#DIV/0!	#DIV/0!	#DIV/0!	#DIV/0!	#DIV/0!	#DIV/0!	#DIV/0!
1			0.9					0	0		#DIV/0!	2	1	3	0			1	0	2					0	0	0	0	Col mop	#DIV/0!	#DIV/0!	#DIV/0!	#DIV/0!	#DIV/0!	#DIV/0!	#DIV/0!	#DIV/0!	#DIV/0!	#DIV/0!	#DIV/0!	#DIV/0!	#DIV/0!	#DIV/0!	#DIV/0!	#DIV/0!	#DIV/0!	#DIV/0!	#DIV/0!	#DIV/0!
1			1					0	0		#DIV/0!	2	1	3	0										0	0	0	0	Col mop	#DIV/0!	#DIV/0!	#DIV/0!	#DIV/0!	#DIV/0!	#DIV/0!	#DIV/0!	#DIV/0!	#DIV/0!	#DIV/0!	#DIV/0!	#DIV/0!	#DIV/0!	#DIV/0!	#DIV/0!	#DIV/0!	#DIV/0!	#DIV/0!	#DIV/0!	#DIV/0!
1	1	Col mop	0.8	3.4	2.55	2.5	3.4	1.2625	0	1	1	1	1	4	1			1	0	2					0	0	0	0	Col mop	17.0252	2.5037	5.0074	10.0148	15.0222	20.0296	25.037	30.0444	55.0814	70.1037	85.1259	120.178	2.5037	5.0074	10.0148	15.0222	17.0252	17.0252	17.0252	17.0252
1	1	Col mop	0.47	4.1	3.6	2.72	4.1	1.58	0	1	1	2	1	4	1			1	0	2					0	0	0	0	Col mop	32.155	3.92134	7.84267	15.6853	23.528	31.3707	39.2134	47.056	86.2694	109.797	133.325	188.224	3.92134	7.84267	15.6853	23.528	31.3707	32.155	32.155	32.155
1			0.35					0	0		#DIV/0!	1	1	2	0			1	0	1					0	0	0	0	Col mop	#DIV/0!	#DIV/0!	#DIV/0!	#DIV/0!	#DIV/0!	#DIV/0!	#DIV/0!	#DIV/0!	#DIV/0!	#DIV/0!	#DIV/0!	#DIV/0!	#DIV/0!	#DIV/0!	#DIV/0!	#DIV/0!	#DIV/0!	#DIV/0!	#DIV/0!	#DIV/0!
1			0.32					0	0		#DIV/0!	1	1	2	0			1	0	1					0	0	0	0	Col mop	#DIV/0!	#DIV/0!	#DIV/0!	#DIV/0!	#DIV/0!	#DIV/0!	#DIV/0!	#DIV/0!	#DIV/0!	#DIV/0!	#DIV/0!	#DIV/0!	#DIV/0!	#DIV/0!	#DIV/0!	#DIV/0!	#DIV/0!	#DIV/0!	#DIV/0!	#DIV/0!
1			0.42					0	0		#DIV/0!	2	1	4	0			1	0	1					0	0	0	0	Col mop	#DIV/0!	#DIV/0!	#DIV/0!	#DIV/0!	#DIV/0!	#DIV/0!	#DIV/0!	#DIV/0!	#DIV/0!	#DIV/0!	#DIV/0!	#DIV/0!	#DIV/0!	#DIV/0!	#DIV/0!	#DIV/0!	#DIV/0!	#DIV/0!	#DIV/0!	#DIV/0!
1	1	Col mop	1.4	5	6.9	6.25	5	3.2875	0	1	1	2	1	6	1			1	0	1					0	0	0	0	Col mop	169.766	16.9766	33.9533	67.9065	101.86	135.813	169.766	203.72	373.486	475.346	577.205	814.878	16.9766	33.9533	67.9065	101.86	135.813	169.766	169.766	169.766
1			1.78					0	0		#DIV/0!	2	1	6	0			1	0	2					0	0	0	0	Col mop	#DIV/0!	#DIV/0!	#DIV/0!	#DIV/0!	#DIV/0!	#DIV/0!	#DIV/0!	#DIV/0!	#DIV/0!	#DIV/0!	#DIV/0!	#DIV/0!	#DIV/0!	#DIV/0!	#DIV/0!	#DIV/0!	#DIV/0!	#DIV/0!	#DIV/0!	#DIV/0!
1			0.35					0	0		#DIV/0!	1	1	2	0			1	0	1					0	0	0	0	Col mop	#DIV/0!	#DIV/0!	#DIV/0!	#DIV/0!	#DIV/0!	#DIV/0!	#DIV/0!	#DIV/0!	#DIV/0!	#DIV/0!	#DIV/0!	#DIV/0!	#DIV/0!	#DIV/0!	#DIV/0!	#DIV/0!	#DIV/0!	#DIV/0!	#DIV/0!	#DIV/0!
1	1	Col mop	0.34	4	4.8	2.3	4	2.51667	0	6	7	1	1	2	1			1	0	1					0	0	0	0	Col mop	62.8652	9.94881	19.8976	39.6407	56.0129	62.8652	53.9206	22.9023	-682.988	-1773.13	-3570.36	-11465.7	9.94881	19.8976	39.6407	56.0129	62.8652	62.8652	62.8652	62.8652
1			0.24					0	0		#DIV/0!	1	1	3	0			1	0	1					0	0	0	0	Col mop	#DIV/0!	#DIV/0!	#DIV/0!	#DIV/0!	#DIV/0!	#DIV/0!	#DIV/0!	#DIV/0!	#DIV/0!	#DIV/0!	#DIV/0!	#DIV/0!	#DIV/0!	#DIV/0!	#DIV/0!	#DIV/0!	#DIV/0!	#DIV/0!	#DIV/0!	#DIV/0!
1			0.8					0	0		#DIV/0!	2	1	4	0			1	0	1					0	0	0	0	Col mop	#DIV/0!	#DIV/0!	#DIV/0!	#DIV/0!	#DIV/0!	#DIV/0!	#DIV/0!	#DIV/0!	#DIV/0!	#DIV/0!	#DIV/0!	#DIV/0!	#DIV/0!	#DIV/0!	#DIV/0!	#DIV/0!	#DIV/0!	#DIV/0!	#DIV/0!	#DIV/0!
1			0.3					0	0		#DIV/0!	1	1	1	0			1	0	2					0	0	0	0	Col mop	#DIV/0!	#DIV/0!	#DIV/0!	#DIV/0!	#DIV/0!	#DIV/0!	#DIV/0!	#DIV/0!	#DIV/0!	#DIV/0!	#DIV/0!	#DIV/0!	#DIV/0!	#DIV/0!	#DIV/0!	#DIV/0!	#DIV/0!	#DIV/0!	#DIV/0!	#DIV/0!
1	1	Col mop	0.58	4.3	5.05	4.15	4.3	2.3	0	1	1	1	1	4	1			1	0	1					0	0	0	0	Col mop	71.4618	8.30951	16.619	33.2381	49.8571	66.4761	83.0951	99.7142	182.809	232.666	282.523	398.857	8.30951	16.619	33.2381	49.8571	66.4761	71.4618	71.4618	71.4618
1			0.37					0	0		#DIV/0!	1	1	2	0			1	0	1					0	0	0	0	Col mop	#DIV/0!	#DIV/0!	#DIV/0!	#DIV/0!	#DIV/0!	#DIV/0!	#DIV/0!	#DIV/0!	#DIV/0!	#DIV/0!	#DIV/0!	#DIV/0!	#DIV/0!	#DIV/0!	#DIV/0!	#DIV/0!	#DIV/0!	#DIV/0!	#DIV/0!	#DIV/0!
1			0.84					0	0		#DIV/0!	2	1	4	0			1	0	2					0	0	0	0	Col mop	#DIV/0!	#DIV/0!	#DIV/0!	#DIV/0!	#DIV/0!	#DIV/0!	#DIV/0!	#DIV/0!	#DIV/0!	#DIV/0!	#DIV/0!	#DIV/0!	#DIV/0!	#DIV/0!	#DIV/0!	#DIV/0!	#DIV/0!	#DIV/0!	#DIV/0!	#DIV/0!
1			0.28					0	0		#DIV/0!	1	1	2	0			1	0	1					0	0	0	0	Col mop	#DIV/0!	#DIV/0!	#DIV/0!	#DIV/0!	#DIV/0!	#DIV/0!	#DIV/0!	#DIV/0!	#DIV/0!	#DIV/0!	#DIV/0!	#DIV/0!	#DIV/0!	#DIV/0!	#DIV/0!	#DIV/0!	#DIV/0!	#DIV/0!	#DIV/0!	#DIV/0!
1	1	Col mop	1.02	4	3.4	2.75	4	1.5375	0	1	1	2	1	4	1			1	0	2					0	0	0	0	Col mop	29.7057	3.71322	7.42643	14.8529	22.2793	29.7057	37.1322	44.5586	81.6907	103.97	126.249	178.234	3.71322	7.42643	14.8529	22.2793	29.7057	29.7057	29.7057	29.7057
1			0.35					0	0		#DIV/0!	1	1	2	0			1	0	1					0	0	0	0	Col mop	#DIV/0!	#DIV/0!	#DIV/0!	#DIV/0!	#DIV/0!	#DIV/0!	#DIV/0!	#DIV/0!	#DIV/0!	#DIV/0!	#DIV/0!	#DIV/0!	#DIV/0!	#DIV/0!	#DIV/0!	#DIV/0!	#DIV/0!	#DIV/0!	#DIV/0!	#DIV/0!
1			0.2					0	0		#DIV/0!	1	1	2	0			1	0	1					0	0	0	0	Col mop	#DIV/0!	#DIV/0!	#DIV/0!	#DIV/0!	#DIV/0!	#DIV/0!	#DIV/0!	#DIV/0!	#DIV/0!	#DIV/0!	#DIV/0!	#DIV/0!	#DIV/0!	#DIV/0!	#DIV/0!	#DIV/0!	#DIV/0!	#DIV/0!	#DIV/0!	#DIV/0!
1			0.13					0	0		#DIV/0!	1	1	3	0			1	0	1					0	0	0	0	Col mop	#DIV/0!	#DIV/0!	#DIV/0!	#DIV/0!	#DIV/0!	#DIV/0!	#DIV/0!	#DIV/0!	#DIV/0!	#DIV/0!	#DIV/0!	#DIV/0!	#DIV/0!	#DIV/0!	#DIV/0!	#DIV/0!	#DIV/0!	#DIV/0!	#DIV/0!	#DIV/0!
1			0.31					0	0		#DIV/0!	2	1	4	0										0	0	0	0	Col mop	#DIV/0!	#DIV/0!	#DIV/0!	#DIV/0!	#DIV/0!	#DIV/0!	#DIV/0!	#DIV/0!	#DIV/0!	#DIV/0!	#DIV/0!	#DIV/0!	#DIV/0!	#DIV/0!	#DIV/0!	#DIV/0!	#DIV/0!	#DIV/0!	#DIV/0!	#DIV/0!
1			0.15					0	0		#DIV/0!	1	1	3	0										0	0	0	0	Col mop	#DIV/0!	#DIV/0!	#DIV/0!	#DIV/0!	#DIV/0!	#DIV/0!	#DIV/0!	#DIV/0!	#DIV/0!	#DIV/0!	#DIV/0!	#DIV/0!	#DIV/0!	#DIV/0!	#DIV/0!	#DIV/0!	#DIV/0!	#DIV/0!	#DIV/0!	#DIV/0!
1			0.11					0	0		#DIV/0!	1	1	4	0										0	0	0	0	Col mop	#DIV/0!	#DIV/0!	#DIV/0!	#DIV/0!	#DIV/0!	#DIV/0!	#DIV/0!	#DIV/0!	#DIV/0!	#DIV/0!	#DIV/0!	#DIV/0!	#DIV/0!	#DIV/0!	#DIV/0!	#DIV/0!	#DIV/0!	#DIV/0!	#DIV/0!	#DIV/0!
1	1	Col mop	1.51	4.5	2.95	3.9	4	1.7125	0.5	1	1	1	1	5	1			1	0	2					0	0	0	0	Col mop	36.8528	0	4.60661	13.8198	23.033	32.2462	41.4595	50.6727	96.7387	124.378	152.018	216.51	0	4.60661	13.8198	23.033	32.2462	36.8528	36.8528	36.8528
1		Col mop	0.64					0	0		#DIV/0!	2	0	7	1										0	0	0	0	Col mop	#DIV/0!	#DIV/0!	#DIV/0!	#DIV/0!	#DIV/0!	#DIV/0!	#DIV/0!	#DIV/0!	#DIV/0!	#DIV/0!	#DIV/0!	#DIV/0!	#DIV/0!	#DIV/0!	#DIV/0!	#DIV/0!	#DIV/0!	#DIV/0!	#DIV/0!	#DIV/0!
1		Col mop	0.92					0	0		#DIV/0!	2	0	7	1										0	0	0	0	Col mop	#DIV/0!	#DIV/0!	#DIV/0!	#DIV/0!	#DIV/0!	#DIV/0!	#DIV/0!	#DIV/0!	#DIV/0!	#DIV/0!	#DIV/0!	#DIV/0!	#DIV/0!	#DIV/0!	#DIV/0!	#DIV/0!	#DIV/0!	#DIV/0!	#DIV/0!	#DIV/0!
1		Col mop	0.65					0	0		#DIV/0!	2	1	6	1										0	0	0	0	Col mop	#DIV/0!	#DIV/0!	#DIV/0!	#DIV/0!	#DIV/0!	#DIV/0!	#DIV/0!	#DIV/0!	#DIV/0!	#DIV/0!	#DIV/0!	#DIV/0!	#DIV/0!	#DIV/0!	#DIV/0!	#DIV/0!	#DIV/0!	#DIV/0!	#DIV/0!	#DIV/0!
1		Col mop	0.72					0	0		#DIV/0!	1	0	7	1										0	0	0	0	Col mop	#DIV/0!	#DIV/0!	#DIV/0!	#DIV/0!	#DIV/0!	#DIV/0!	#DIV/0!	#DIV/0!	#DIV/0!	#DIV/0!	#DIV/0!	#DIV/0!	#DIV/0!	#DIV/0!	#DIV/0!	#DIV/0!	#DIV/0!	#DIV/0!	#DIV/0!	#DIV/0!
1		Col mop	0.55					0	0		#DIV/0!	1	1	5	1										0	0	0	0	Col mop	#DIV/0!	#DIV/0!	#DIV/0!	#DIV/0!	#DIV/0!	#DIV/0!	#DIV/0!	#DIV/0!	#DIV/0!	#DIV/0!	#DIV/0!	#DIV/0!	#DIV/0!	#DIV/0!	#DIV/0!	#DIV/0!	#DIV/0!	#DIV/0!	#DIV/0!	#DIV/0!
1	1	Col mop	0.9	3.7	2.53	3.76	3.7	1.5725	0	1	1	2	1	4	1			1	0	1					0	0	0	0	Col mop	28.7431	3.8842	7.76839	15.5368	23.3052	31.0736	38.842	46.6104	85.4523	108.758	132.063	186.441	3.8842	7.76839	15.5368	23.3052	28.7431	28.7431	28.7431	28.7431
1			0.26					0	0		#DIV/0!	1	1	3	0			1	0	1					0	0	0	0	Col mop	#DIV/0!	#DIV/0!	#DIV/0!	#DIV/0!	#DIV/0!	#DIV/0!	#DIV/0!	#DIV/0!	#DIV/0!	#DIV/0!	#DIV/0!	#DIV/0!	#DIV/0!	#DIV/0!	#DIV/0!	#DIV/0!	#DIV/0!	#DIV/0!	#DIV/0!	#DIV/0!
1		Col mop	0.47					0	0		#DIV/0!	2	1	5	1			1	0	1					0	0	0	0	Col mop	#DIV/0!	#DIV/0!	#DIV/0!	#DIV/0!	#DIV/0!	#DIV/0!	#DIV/0!	#DIV/0!	#DIV/0!	#DIV/0!	#DIV/0!	#DIV/0!	#DIV/0!	#DIV/0!	#DIV/0!	#DIV/0!	#DIV/0!	#DIV/0!	#DIV/0!	#DIV/0!
1			0.56					0	0		#DIV/0!	2	1	4	0			1	0	1					0	0	0	0	Col mop	#DIV/0!	#DIV/0!	#DIV/0!	#DIV/0!	#DIV/0!	#DIV/0!	#DIV/0!	#DIV/0!	#DIV/0!	#DIV/0!	#DIV/0!	#DIV/0!	#DIV/0!	#DIV/0!	#DIV/0!	#DIV/0!	#DIV/0!	#DIV/0!	#DIV/0!	#DIV/0!
1			0.25					0	0		#DIV/0!	1	1	4	0			1	0	1					0	0	0	0	Col mop	#DIV/0!	#DIV/0!	#DIV/0!	#DIV/0!	#DIV/0!	#DIV/0!	#DIV/0!	#DIV/0!	#DIV/0!	#DIV/0!	#DIV/0!	#DIV/0!	#DIV/0!	#DIV/0!	#DIV/0!	#DIV/0!	#DIV/0!	#DIV/0!	#DIV/0!	#DIV/0!
1			0.22					0	0		#DIV/0!	1	1	3	0			1	0	1					0	0	0	0	Col mop	#DIV/0!	#DIV/0!	#DIV/0!	#DIV/0!	#DIV/0!	#DIV/0!	#DIV/0!	#DIV/0!	#DIV/0!	#DIV/0!	#DIV/0!	#DIV/0!	#DIV/0!	#DIV/0!	#DIV/0!	#DIV/0!	#DIV/0!	#DIV/0!	#DIV/0!	#DIV/0!
1			0.23					0	0		#DIV/0!	1	1	3	0			1	0	1					0	0	0	0	Col mop	#DIV/0!	#DIV/0!	#DIV/0!	#DIV/0!	#DIV/0!	#DIV/0!	#DIV/0!	#DIV/0!	#DIV/0!	#DIV/0!	#DIV/0!	#DIV/0!	#DIV/0!	#DIV/0!	#DIV/0!	#DIV/0!	#DIV/0!	#DIV/0!	#DIV/0!	#DIV/0!
1			0.14					0	0		#DIV/0!	1	0	2	0										0	0	0	0	Col mop	#DIV/0!	#DIV/0!	#DIV/0!	#DIV/0!	#DIV/0!	#DIV/0!	#DIV/0!	#DIV/0!	#DIV/0!	#DIV/0!	#DIV/0!	#DIV/0!	#DIV/0!	#DIV/0!	#DIV/0!	#DIV/0!	#DIV/0!	#DIV/0!	#DIV/0!	#DIV/0!
1	1	Col mop	1.5	3.3	3.12	3.6	2.8	1.68	0.5	1	1	2	1	5	1			1	0	2					0	0	0	0	Col mop	24.8271	0	4.43342	13.3002	22.1671	31.0339	39.9007	48.7676	93.1017	119.702	146.303	208.371	0	4.43342	13.3002	22.1671	24.8271	24.8271	24.8271	24.8271
1			0.38					0	0		#DIV/0!	1	1	3	0			1	0	2					0	0	0	0	Col mop	#DIV/0!	#DIV/0!	#DIV/0!	#DIV/0!	#DIV/0!	#DIV/0!	#DIV/0!	#DIV/0!	#DIV/0!	#DIV/0!	#DIV/0!	#DIV/0!	#DIV/0!	#DIV/0!	#DIV/0!	#DIV/0!	#DIV/0!	#DIV/0!	#DIV/0!	#DIV/0!
1			0.37					0	0		#DIV/0!	1	0	2	0			1	0	1					0	0	0	0	Col mop	#DIV/0!	#DIV/0!	#DIV/0!	#DIV/0!	#DIV/0!	#DIV/0!	#DIV/0!	#DIV/0!	#DIV/0!	#DIV/0!	#DIV/0!	#DIV/0!	#DIV/0!	#DIV/0!	#DIV/0!	#DIV/0!	#DIV/0!	#DIV/0!	#DIV/0!	#DIV/0!
1	1	Col mop	0.82	4	3.8	3.75	4	1.8875	0	1	1	2	1	5	1			1	0	1					0	0	0	0	Col mop	44.7697	5.59621	11.1924	22.3848	33.5772	44.7697	55.9621	67.1545	123.117	156.694	190.271	268.618	5.59621	11.1924	22.3848	33.5772	44.7697	44.7697	44.7697	44.7697
1			0.42					0	0		#DIV/0!	2	1	5	0			1	0	1					0	0	0	0	Col mop	#DIV/0!	#DIV/0!	#DIV/0!	#DIV/0!	#DIV/0!	#DIV/0!	#DIV/0!	#DIV/0!	#DIV/0!	#DIV/0!	#DIV/0!	#DIV/0!	#DIV/0!	#DIV/0!	#DIV/0!	#DIV/0!	#DIV/0!	#DIV/0!	#DIV/0!	#DIV/0!
1			0.15					0	0		#DIV/0!	1	1	2	0			1	0	1					0	0	0	0	Col mop	#DIV/0!	#DIV/0!	#DIV/0!	#DIV/0!	#DIV/0!	#DIV/0!	#DIV/0!	#DIV/0!	#DIV/0!	#DIV/0!	#DIV/0!	#DIV/0!	#DIV/0!	#DIV/0!	#DIV/0!	#DIV/0!	#DIV/0!	#DIV/0!	#DIV/0!	#DIV/0!
1			0.1					0	0		#DIV/0!	1	1	3	0										0	0	0	0	Col mop	#DIV/0!	#DIV/0!	#DIV/0!	#DIV/0!	#DIV/0!	#DIV/0!	#DIV/0!	#DIV/0!	#DIV/0!	#DIV/0!	#DIV/0!	#DIV/0!	#DIV/0!	#DIV/0!	#DIV/0!	#DIV/0!	#DIV/0!	#DIV/0!	#DIV/0!	#DIV/0!
1			1					0	0		#DIV/0!	2	1	5	0			1	0	3					0	0	0	0	Col mop	#DIV/0!	#DIV/0!	#DIV/0!	#DIV/0!	#DIV/0!	#DIV/0!	#DIV/0!	#DIV/0!	#DIV/0!	#DIV/0!	#DIV/0!	#DIV/0!	#DIV/0!	#DIV/0!	#DIV/0!	#DIV/0!	#DIV/0!	#DIV/0!	#DIV/0!	#DIV/0!
1			0.5					0	0		#DIV/0!	2	1	5	0			1	0	1					0	0	0	0	Col mop	#DIV/0!	#DIV/0!	#DIV/0!	#DIV/0!	#DIV/0!	#DIV/0!	#DIV/0!	#DIV/0!	#DIV/0!	#DIV/0!	#DIV/0!	#DIV/0!	#DIV/0!	#DIV/0!	#DIV/0!	#DIV/0!	#DIV/0!	#DIV/0!	#DIV/0!	#DIV/0!
1		Col mop	1.03					0	0		#DIV/0!	2	1	5	1			1	0	1					0	0	0	0	Col mop	#DIV/0!	#DIV/0!	#DIV/0!	#DIV/0!	#DIV/0!	#DIV/0!	#DIV/0!	#DIV/0!	#DIV/0!	#DIV/0!	#DIV/0!	#DIV/0!	#DIV/0!	#DIV/0!	#DIV/0!	#DIV/0!	#DIV/0!	#DIV/0!	#DIV/0!	#DIV/0!
1		Col mop	0.58					0	0		#DIV/0!	2	1	4	1			1	0	1					0	0	0	0	Col mop	#DIV/0!	#DIV/0!	#DIV/0!	#DIV/0!	#DIV/0!	#DIV/0!	#DIV/0!	#DIV/0!	#DIV/0!	#DIV/0!	#DIV/0!	#DIV/0!	#DIV/0!	#DIV/0!	#DIV/0!	#DIV/0!	#DIV/0!	#DIV/0!	#DIV/0!	#DIV/0!
1			0.5					0	0		#DIV/0!	2	1	5	0			1	0	1					0	0	0	0	Col mop	#DIV/0!	#DIV/0!	#DIV/0!	#DIV/0!	#DIV/0!	#DIV/0!	#DIV/0!	#DIV/0!	#DIV/0!	#DIV/0!	#DIV/0!	#DIV/0!	#DIV/0!	#DIV/0!	#DIV/0!	#DIV/0!	#DIV/0!	#DIV/0!	#DIV/0!	#DIV/0!
1		Col mop	0.48					0	0		#DIV/0!	2	1	5	1			1	0	1					0	0	0	0	Col mop	#DIV/0!	#DIV/0!	#DIV/0!	#DIV/0!	#DIV/0!	#DIV/0!	#DIV/0!	#DIV/0!	#DIV/0!	#DIV/0!	#DIV/0!	#DIV/0!	#DIV/0!	#DIV/0!	#DIV/0!	#DIV/0!	#DIV/0!	#DIV/0!	#DIV/0!	#DIV/0!
1	1	Col mop	1.05	4.7	7.12	5.7	4.7	3.205	0	1	1	2	1	5	1			1	0	2					0	0	0	0	Col mop	151.671	16.1353	32.2705	64.541	96.8116	129.082	161.353	193.623	354.976	451.787	548.599	774.492	16.1353	32.2705	64.541	96.8116	129.082	151.671	151.671	151.671
1			0.18					0	0		#DIV/0!	1	1	2	0			1	0	1					0	0	0	0	Col mop	#DIV/0!	#DIV/0!	#DIV/0!	#DIV/0!	#DIV/0!	#DIV/0!	#DIV/0!	#DIV/0!	#DIV/0!	#DIV/0!	#DIV/0!	#DIV/0!	#DIV/0!	#DIV/0!	#DIV/0!	#DIV/0!	#DIV/0!	#DIV/0!	#DIV/0!	#DIV/0!
1	1	Col mop	1.2	3.1	3	2.7	2.6	1.425	0.5	1	1	2	1	5	1			1	0	1					0	0	0	0	Col mop	16.5864	0	3.1897	9.56909	15.9485	22.3279	28.7073	35.0867	66.9837	86.1219	105.26	149.916	0	3.1897	9.56909	15.9485	16.5864	16.5864	16.5864	16.5864
1			2					0	0		#DIV/0!	2	0	7	0										0	0	0	0	Col mop	#DIV/0!	#DIV/0!	#DIV/0!	#DIV/0!	#DIV/0!	#DIV/0!	#DIV/0!	#DIV/0!	#DIV/0!	#DIV/0!	#DIV/0!	#DIV/0!	#DIV/0!	#DIV/0!	#DIV/0!	#DIV/0!	#DIV/0!	#DIV/0!	#DIV/0!	#DIV/0!
1	1	Col mop	0.55	3.4	2.6	3.2	2.9	1.45	0.5	1	1	2	1	4	1			1	0	1					0	0	0	0	Col mop	19.1551	0	3.3026	9.9078	16.513	23.1182	29.7234	36.3286	69.3546	89.1702	108.986	155.222	0	3.3026	9.9078	16.513	19.1551	19.1551	19.1551	19.1551
1	1	Col mop	0.67	3.3	2.65	2.75	3.3	1.35	0	1	1	1	1	3	1			1	0	1					0	0	0	0	Col mop	18.8943	2.86278	5.72555	11.4511	17.1767	22.9022	28.6278	34.3533	62.9811	80.1577	97.3344	137.413	2.86278	5.72555	11.4511	17.1767	18.8943	18.8943	18.8943	18.8943
1			0.17					0	0		#DIV/0!	1	1	2	0										0	0	0	0	Col mop	#DIV/0!	#DIV/0!	#DIV/0!	#DIV/0!	#DIV/0!	#DIV/0!	#DIV/0!	#DIV/0!	#DIV/0!	#DIV/0!	#DIV/0!	#DIV/0!	#DIV/0!	#DIV/0!	#DIV/0!	#DIV/0!	#DIV/0!	#DIV/0!	#DIV/0!	#DIV/0!
1			0.13					0	0		#DIV/0!	1	1	2	0										0	0	0	0	Col mop	#DIV/0!	#DIV/0!	#DIV/0!	#DIV/0!	#DIV/0!	#DIV/0!	#DIV/0!	#DIV/0!	#DIV/0!	#DIV/0!	#DIV/0!	#DIV/0!	#DIV/0!	#DIV/0!	#DIV/0!	#DIV/0!	#DIV/0!	#DIV/0!	#DIV/0!	#DIV/0!
1	1	Col mop	0.77	3.4	2.8	2.25	2.9	1.2625	0.5	1	1	2	1	5	1			1	0	1					0	0	0	0	Col mop	14.5215	0	2.5037	7.51111	12.5185	17.5259	22.5333	27.5407	52.5777	67.6	82.6222	117.674	0	2.5037	7.51111	12.5185	14.5215	14.5215	14.5215	14.5215
1			0.45					0	0		#DIV/0!	2	1	5	0										0	0	0	0	Col mop	#DIV/0!	#DIV/0!	#DIV/0!	#DIV/0!	#DIV/0!	#DIV/0!	#DIV/0!	#DIV/0!	#DIV/0!	#DIV/0!	#DIV/0!	#DIV/0!	#DIV/0!	#DIV/0!	#DIV/0!	#DIV/0!	#DIV/0!	#DIV/0!	#DIV/0!	#DIV/0!
1			0.54					0	0		#DIV/0!	2	1	5	0			1	0	1					0	0	0	0	Col mop	#DIV/0!	#DIV/0!	#DIV/0!	#DIV/0!	#DIV/0!	#DIV/0!	#DIV/0!	#DIV/0!	#DIV/0!	#DIV/0!	#DIV/0!	#DIV/0!	#DIV/0!	#DIV/0!	#DIV/0!	#DIV/0!	#DIV/0!	#DIV/0!	#DIV/0!	#DIV/0!
1		Col mop	0.58					0	0		#DIV/0!	2	1	5	1			1	0	1					0	0	0	0	Col mop	#DIV/0!	#DIV/0!	#DIV/0!	#DIV/0!	#DIV/0!	#DIV/0!	#DIV/0!	#DIV/0!	#DIV/0!	#DIV/0!	#DIV/0!	#DIV/0!	#DIV/0!	#DIV/0!	#DIV/0!	#DIV/0!	#DIV/0!	#DIV/0!	#DIV/0!	#DIV/0!
2	1	Col mopA	2.74	20.7	10.5	9.8	19.7	5.075	1	3	3	1	1	1	1	2		1	0	1					5.5	18	0	0	Col mopA	530.802	-41.4509	0	76.799	145.808	207.444	262.123	310.263	467.437	509.921	527.285	533.297	0	0	76.799	145.808	207.444	262.123	310.263	467.437
2	1	Col mopA	3.6	21.5	14.5	11.8	21.5	6.575	0	3	3	1	1	1	1	2		1	0	1					18	18	0	0	Col mopA	972.353	66.2732	129.464	246.895	352.878	448.001	532.852	608.016	859.093	931.078	963.438	973.882	66.2732	129.464	246.895	352.878	448.001	532.852	608.016	859.093
2		Col mopA	2.31					0	0		#DIV/0!				1	7									0	0	0	0	Col mopA	#DIV/0!	#DIV/0!	#DIV/0!	#DIV/0!	#DIV/0!	#DIV/0!	#DIV/0!	#DIV/0!	#DIV/0!	#DIV/0!	#DIV/0!	#DIV/0!	#DIV/0!	#DIV/0!	#DIV/0!	#DIV/0!	#DIV/0!	#DIV/0!	#DIV/0!	#DIV/0!
2	1	Col mopA	1.72	16.8	8.3	7.25	16.8	3.8875	0	3	3				1			1	0	2					63	0	0	0	Col mopA	265.61	23.0164	44.6631	84.0159	118.394	148.135	173.573	195.045	254.68	264.38	265.61	286.518	23.0164	44.6631	84.0159	118.394	148.135	173.573	195.045	254.68
2	1	Col mopA	1.82	15.7	8.05	9.73	12.7	4.445	3	3	3	1	1	1	1	2		1	0	1					18	0	0	0	Col mopA	262.507	-187.543	-144.575	-67.0204	0	57.2551	105.514	145.545	249.202	261.878	262.789	335.784	0	0	0	0	57.2551	105.514	145.545	249.202
2	1	Col mopA	2.75	17	10.6	11.8	16	5.6	1	3	3	1	1	1	1	1		1	0	1					0	18	0	0	Col mopA	524.916	-50.7648	0	92.3986	173.263	243.363	303.467	354.344	497.235	521.456	524.916	568.873	0	0	92.3986	173.263	243.363	303.467	354.344	497.235
2	1	Col mopA	3.55	23.3	13.7	11.8	21.3	6.375	2	3	3	1	0	1	1	2		1	0	1					5.5	18	0	0	Col mopA	905.595	-205.113	-133.631	0	121.654	231.894	331.282	420.381	731.21	830.217	882.163	905.627	0	0	0	121.654	231.894	331.282	420.381	731.21
2	1	Col mopA	1.55	15.5	6.7	6.5	15.5	3.3	0	7	7	1	1	2	1	1		1	0	1					18	0	0	0	Col mopA	492.577	17.106	34.2119	68.4239	102.636	136.848	171.06	205.272	376.331	472.804	465.743	-898.176	17.106	34.2119	68.4239	102.636	136.848	171.06	205.272	376.331
2	1	Col mopA	1.58	14.3	8.5	6.18	9.3	3.67	5	3	3				1	1									83	0	0	0	Col mopA	131.042	-297.11	-252.238	-172.121	-104.028	-46.9797	-2.50297e-14	37.8891	125.187	131.037	134.248	279.729	0	0	0	0	0	0	37.8891	125.187
2	1	Col mopA	1.75	17.9	7.27	8.38	12.9	3.9125	5	3	3	1	1	2	1	1		1	0	1					63	0	0	18	Col mopA	206.582	-300.375	-257.916	-180.243	-111.751	-51.8628	5.68935e-14	44.4144	174.969	200.874	206.512	228.425	0	0	0	0	0	0	44.4144	174.969
2	1	Col mopA	2.16	15	8.3	8.78	8	4.27	7	3	3	1	1	3	1	1		1	0	1					63	0	0	0	Col mopA	152.595	-756.008	-665.218	-502.192	-362.413	-244.092	-145.442	-64.674	133.52	152.297	154.979	369.864	0	0	0	0	0	0	0	133.52
2	1	Col mopA	1.53	16.7	11.5	10.1	16.7	5.4	0	3	3	1	1	1	1	1		1	0	1					38	0	0	5.5	Col mopA	509.446	44.4023	86.1465	161.989	228.184	285.388	334.257	375.447	489.189	507.293	509.449	551.998	44.4023	86.1465	161.989	228.184	285.388	334.257	375.447	489.189
2			1.42					0	0		#DIV/0!				0										0	0	0	0	Col mopA	#DIV/0!	#DIV/0!	#DIV/0!	#DIV/0!	#DIV/0!	#DIV/0!	#DIV/0!	#DIV/0!	#DIV/0!	#DIV/0!	#DIV/0!	#DIV/0!	#DIV/0!	#DIV/0!	#DIV/0!	#DIV/0!	#DIV/0!	#DIV/0!	#DIV/0!	#DIV/0!
2	1	Col mopA	2.7	17.5	10	10.9	17.5	5.225	0	3	3	1	1	1	1	2		1	0	1					38	0	0	0	Col mopA	499.81	41.6285	80.8788	152.525	215.498	270.358	317.663	357.975	474.199	495.811	499.798	525.421	41.6285	80.8788	152.525	215.498	270.358	317.663	357.975	474.199
2	1	Col mopA	2	21.5	15.8	14.2	18.5	7.5	3	3	3	1	0	1	1	1									0	0	0	0	Col mopA	1088.65	-503.672	-392.622	-186.252	0	167.167	316.281	448.373	889.61	1016.11	1072.98	1091.34	0	0	0	0	167.167	316.281	448.373	889.61
2	1	Col mopA	2.45	21.6	13.3	13.7	20.6	6.75	1	3	3	1	1	1	1	1									5.5	0	0	0	Col mopA	981.904	-73.2473	-1.69341e-13	136.166	259.124	369.546	468.107	555.48	848.126	932.597	970.971	983.456	0	0	136.166	259.124	369.546	468.107	555.48	848.126
2	1	Col mopA	2.17	15.9	7.68	6	15.4	3.42	0.5	3	3	1	1	1	1	1		1	0	1					18	0	0	0	Col mopA	188.437	-2.17358e-14	17.7648	49.8737	77.6797	101.492	121.621	138.375	182.367	188.083	188.506	215.857	0	17.7648	49.8737	77.6797	101.492	121.621	138.375	182.367
2	1	Col mopA	1.5	16.8	3.4	9.8	10.8	3.3	6	3	3				1	1									63	0	0	0	Col mopA	123.04	-299.957	-262.213	-193.596	-133.652	-81.7953	-37.44	0	103.983	120.896	123.041	159.496	0	0	0	0	0	0	0	103.983
2	1	Col mopA	2.28	14.2	10.2	8.3	10.2	4.625	4	3	3	1	1	2	1	2									5.5	0	0	0	Col mopA	228.254	-324.815	-266.443	-162.314	-73.9302	0	60.7668	109.661	221.206	228.252	232.975	430.693	0	0	0	0	0	60.7668	109.661	221.206
2	1	Col mopA	1.7	17.4	12	9.1	13.4	5.275	4	3	3				1	1									63	0	0	0	Col mopA	390.071	-392.438	-325.019	-202.024	-94.0086	1.03419e-13	80.9744	149.887	347.573	383.699	390.061	436.679	0	0	0	0	0	80.9744	149.887	347.573
2	1	Col mopA	2.23	21.9	10.7	9.8	20.9	5.125	1	3	3	1	1	1	1	1		1	0	1					38	0	18	0	Col mopA	574.286	-42.2106	0	78.5521	149.593	213.501	270.653	321.426	492.821	543.271	566.885	574.868	0	0	78.5521	149.593	213.501	270.653	321.426	492.821
[truncated: 68 more columns]

## Sheet: Site4
Date:	24/8/2014														Tree density ≤ 10m (no/ha)	208
Trans. No.:	GNP5														Tree density > 10m (no/ha)	16
			Transect 1									Transect 2 for Tall Trees (GPS coordinates)			Tree height (m)	5.02143
			Width (m)	Length (m)	Area (ha)							Initial	Extension	Total area (ha)	Lower level of canopy (m)	#REF!
	Transect Dimensions:		25	50	0.125							1298.65	4881.16	0.617981
	Co-ordinates:			X	Y								X	Y
			NW Corner									NW Corner
			SW Corner									SW Corner
			NE Corner									NE Corner
			SE Corner									SE Corner
			Max
			2	20								OED				OUD	DRT	NED				NUD	NFD	OFD	OBE	OBU	NBE	NBU	RE	Canopy volume (m3) up to specified height class	Height classes (m)
Trans. No.	Tree	Sp. Code	Stem Circum.(cm)	Height (m)	D1 (m)	D2 (m)	CD (m)	R	Y	Shape	Adj. Shape	F	C	S	Tree			F	C	S	E									Total	0.5	1	2	3	4	5	6	11	14	17	24	0.5	1	2	3	4	5	6	11
1	1	Col mop	0.68	5	4.6	4.3	4.5	2.225	0.5	1	1	1	1	3	1			1	0	1					0	0	0	0	Col mop	69.9878	0	7.77642	23.3293	38.8821	54.435	69.9878	85.5407	163.305	209.963	256.622	365.492	0	7.77642	23.3293	38.8821	54.435	69.9878	69.9878	69.9878
1			0.7					0	0		#DIV/0!	2	0	7	0										0	0	0	0	Col mop	#DIV/0!	#DIV/0!	#DIV/0!	#DIV/0!	#DIV/0!	#DIV/0!	#DIV/0!	#DIV/0!	#DIV/0!	#DIV/0!	#DIV/0!	#DIV/0!	#DIV/0!	#DIV/0!	#DIV/0!	#DIV/0!	#DIV/0!	#DIV/0!	#DIV/0!	#DIV/0!
1	1	Col mop	0.5	4	3	1.98	4	1.245	0	1	1	1	1	2	1			1	0	1					0	0	0	0	Col mop	19.4782	2.43477	4.86955	9.73909	14.6086	19.4782	24.3477	29.2173	53.565	68.1737	82.7823	116.869	2.43477	4.86955	9.73909	14.6086	19.4782	19.4782	19.4782	19.4782
1			0.11					0	0		#DIV/0!	1	0	2	0										0	0	0	0	Col mop	#DIV/0!	#DIV/0!	#DIV/0!	#DIV/0!	#DIV/0!	#DIV/0!	#DIV/0!	#DIV/0!	#DIV/0!	#DIV/0!	#DIV/0!	#DIV/0!	#DIV/0!	#DIV/0!	#DIV/0!	#DIV/0!	#DIV/0!	#DIV/0!	#DIV/0!	#DIV/0!
1			0.1					0	0		#DIV/0!	1	0	2	0										0	0	0	0	Col mop	#DIV/0!	#DIV/0!	#DIV/0!	#DIV/0!	#DIV/0!	#DIV/0!	#DIV/0!	#DIV/0!	#DIV/0!	#DIV/0!	#DIV/0!	#DIV/0!	#DIV/0!	#DIV/0!	#DIV/0!	#DIV/0!	#DIV/0!	#DIV/0!	#DIV/0!	#DIV/0!
1			0.08					0	0		#DIV/0!	1	0	1	0										0	0	0	0	Col mop	#DIV/0!	#DIV/0!	#DIV/0!	#DIV/0!	#DIV/0!	#DIV/0!	#DIV/0!	#DIV/0!	#DIV/0!	#DIV/0!	#DIV/0!	#DIV/0!	#DIV/0!	#DIV/0!	#DIV/0!	#DIV/0!	#DIV/0!	#DIV/0!	#DIV/0!	#DIV/0!
1			0.12					0	0		#DIV/0!	1	1	2	0			1	0	1					0	0	0	0	Col mop	#DIV/0!	#DIV/0!	#DIV/0!	#DIV/0!	#DIV/0!	#DIV/0!	#DIV/0!	#DIV/0!	#DIV/0!	#DIV/0!	#DIV/0!	#DIV/0!	#DIV/0!	#DIV/0!	#DIV/0!	#DIV/0!	#DIV/0!	#DIV/0!	#DIV/0!	#DIV/0!
1			0.4					0	0		#DIV/0!	2	0	7	0										0	0	0	0	Col mop	#DIV/0!	#DIV/0!	#DIV/0!	#DIV/0!	#DIV/0!	#DIV/0!	#DIV/0!	#DIV/0!	#DIV/0!	#DIV/0!	#DIV/0!	#DIV/0!	#DIV/0!	#DIV/0!	#DIV/0!	#DIV/0!	#DIV/0!	#DIV/0!	#DIV/0!	#DIV/0!
1			0.2					0	0		#DIV/0!	1	1	3	0										0	0	0	0	Col mop	#DIV/0!	#DIV/0!	#DIV/0!	#DIV/0!	#DIV/0!	#DIV/0!	#DIV/0!	#DIV/0!	#DIV/0!	#DIV/0!	#DIV/0!	#DIV/0!	#DIV/0!	#DIV/0!	#DIV/0!	#DIV/0!	#DIV/0!	#DIV/0!	#DIV/0!	#DIV/0!
1	1	Col mop	0.48	3.3	3.1	2.4	2.8	1.375	0.5	3	3	1	1	4	1			1	0	1					0	0	0	0	Col mop	5.53806	0	2.46856	4.9838	5.53125	5.62459	6.77751	10.5037	120.712	314.592	654.24	2243.2	0	2.46856	4.9838	5.53125	5.53806	5.53806	5.53806	5.53806
1			0.32					0	0		#DIV/0!	1	1	4	0			1	0	2					0	0	0	0	Col mop	#DIV/0!	#DIV/0!	#DIV/0!	#DIV/0!	#DIV/0!	#DIV/0!	#DIV/0!	#DIV/0!	#DIV/0!	#DIV/0!	#DIV/0!	#DIV/0!	#DIV/0!	#DIV/0!	#DIV/0!	#DIV/0!	#DIV/0!	#DIV/0!	#DIV/0!	#DIV/0!
1			0.12					0	0		#DIV/0!	1	1	3	0			1	0	2					0	0	0	0	Col mop	#DIV/0!	#DIV/0!	#DIV/0!	#DIV/0!	#DIV/0!	#DIV/0!	#DIV/0!	#DIV/0!	#DIV/0!	#DIV/0!	#DIV/0!	#DIV/0!	#DIV/0!	#DIV/0!	#DIV/0!	#DIV/0!	#DIV/0!	#DIV/0!	#DIV/0!	#DIV/0!
1			0.3					0	0		#DIV/0!	2	1	5	0										0	0	0	0	Col mop	#DIV/0!	#DIV/0!	#DIV/0!	#DIV/0!	#DIV/0!	#DIV/0!	#DIV/0!	#DIV/0!	#DIV/0!	#DIV/0!	#DIV/0!	#DIV/0!	#DIV/0!	#DIV/0!	#DIV/0!	#DIV/0!	#DIV/0!	#DIV/0!	#DIV/0!	#DIV/0!
1			0.08					0	0		#DIV/0!	1	0	2	0										0	0	0	0	Col mop	#DIV/0!	#DIV/0!	#DIV/0!	#DIV/0!	#DIV/0!	#DIV/0!	#DIV/0!	#DIV/0!	#DIV/0!	#DIV/0!	#DIV/0!	#DIV/0!	#DIV/0!	#DIV/0!	#DIV/0!	#DIV/0!	#DIV/0!	#DIV/0!	#DIV/0!	#DIV/0!
1			0.08					0	0		#DIV/0!	2	1	3	0										0	0	0	0	Col mop	#DIV/0!	#DIV/0!	#DIV/0!	#DIV/0!	#DIV/0!	#DIV/0!	#DIV/0!	#DIV/0!	#DIV/0!	#DIV/0!	#DIV/0!	#DIV/0!	#DIV/0!	#DIV/0!	#DIV/0!	#DIV/0!	#DIV/0!	#DIV/0!	#DIV/0!	#DIV/0!
1		Col mop	0.65					0	0		#DIV/0!				1			2	1	5					0	0	0	0	Col mop	#DIV/0!	#DIV/0!	#DIV/0!	#DIV/0!	#DIV/0!	#DIV/0!	#DIV/0!	#DIV/0!	#DIV/0!	#DIV/0!	#DIV/0!	#DIV/0!	#DIV/0!	#DIV/0!	#DIV/0!	#DIV/0!	#DIV/0!	#DIV/0!	#DIV/0!	#DIV/0!
1	1	Col mop	0.63	4.5	4.6	3.9	3.5	2.125	1	1	1	1	1	4	1			1	0	1					0	0	0	0	Col mop	49.6519	-7.09313	0	14.1863	28.3725	42.5588	56.745	70.9313	141.863	184.421	226.98	326.284	0	0	14.1863	28.3725	42.5588	49.6519	49.6519	49.6519
1	1	Col mop	0.66	5.5	4.05	2.8	5.5	1.7125	0	3	3	1	1	2	1			1	0	1					0	0	0	0	Col mop	16.874	4.19631	7.63197	12.5256	15.2893	16.5317	16.8613	16.8867	33.748	79.1595	171.123	659.037	4.19631	7.63197	12.5256	15.2893	16.5317	16.8613	16.874	16.874
1			0.13					0	0		#DIV/0!	1	0	1	0										0	0	0	0	Col mop	#DIV/0!	#DIV/0!	#DIV/0!	#DIV/0!	#DIV/0!	#DIV/0!	#DIV/0!	#DIV/0!	#DIV/0!	#DIV/0!	#DIV/0!	#DIV/0!	#DIV/0!	#DIV/0!	#DIV/0!	#DIV/0!	#DIV/0!	#DIV/0!	#DIV/0!	#DIV/0!
1			0.1					0	0		#DIV/0!	1	0	1	0										0	0	0	0	Col mop	#DIV/0!	#DIV/0!	#DIV/0!	#DIV/0!	#DIV/0!	#DIV/0!	#DIV/0!	#DIV/0!	#DIV/0!	#DIV/0!	#DIV/0!	#DIV/0!	#DIV/0!	#DIV/0!	#DIV/0!	#DIV/0!	#DIV/0!	#DIV/0!	#DIV/0!	#DIV/0!
1		Col mop	0.65					0	0		#DIV/0!	2	1	5	1			1	0	1					0	0	0	0	Col mop	#DIV/0!	#DIV/0!	#DIV/0!	#DIV/0!	#DIV/0!	#DIV/0!	#DIV/0!	#DIV/0!	#DIV/0!	#DIV/0!	#DIV/0!	#DIV/0!	#DIV/0!	#DIV/0!	#DIV/0!	#DIV/0!	#DIV/0!	#DIV/0!	#DIV/0!	#DIV/0!
1		Col mop	0.24					0	0		#DIV/0!	1	1	3	1			1	0	1					0	0	0	0	Col mop	#DIV/0!	#DIV/0!	#DIV/0!	#DIV/0!	#DIV/0!	#DIV/0!	#DIV/0!	#DIV/0!	#DIV/0!	#DIV/0!	#DIV/0!	#DIV/0!	#DIV/0!	#DIV/0!	#DIV/0!	#DIV/0!	#DIV/0!	#DIV/0!	#DIV/0!	#DIV/0!
1	1	Col mop	0.3	3.3	2.95	2.7	3.3	1.4125	0	1	1	1	1	2	1			1	0	1					0	0	0	0	Col mop	20.6843	3.13398	6.26797	12.5359	18.8039	25.0719	31.3398	37.6078	68.9477	87.7516	106.555	150.431	3.13398	6.26797	12.5359	18.8039	20.6843	20.6843	20.6843	20.6843
1			0.2					0	0		#DIV/0!	1	1	3	0			1	0	1					0	0	0	0	Col mop	#DIV/0!	#DIV/0!	#DIV/0!	#DIV/0!	#DIV/0!	#DIV/0!	#DIV/0!	#DIV/0!	#DIV/0!	#DIV/0!	#DIV/0!	#DIV/0!	#DIV/0!	#DIV/0!	#DIV/0!	#DIV/0!	#DIV/0!	#DIV/0!	#DIV/0!	#DIV/0!
1			0.1					0	0		#DIV/0!	1	1	3	0			1	0	2					0	0	0	0	Col mop	#DIV/0!	#DIV/0!	#DIV/0!	#DIV/0!	#DIV/0!	#DIV/0!	#DIV/0!	#DIV/0!	#DIV/0!	#DIV/0!	#DIV/0!	#DIV/0!	#DIV/0!	#DIV/0!	#DIV/0!	#DIV/0!	#DIV/0!	#DIV/0!	#DIV/0!	#DIV/0!
1			0.09					0	0		#DIV/0!	1	1	4	0										0	0	0	0	Col mop	#DIV/0!	#DIV/0!	#DIV/0!	#DIV/0!	#DIV/0!	#DIV/0!	#DIV/0!	#DIV/0!	#DIV/0!	#DIV/0!	#DIV/0!	#DIV/0!	#DIV/0!	#DIV/0!	#DIV/0!	#DIV/0!	#DIV/0!	#DIV/0!	#DIV/0!	#DIV/0!
1			0.06					0	0		#DIV/0!	1	1	4	0										0	0	0	0	Col mop	#DIV/0!	#DIV/0!	#DIV/0!	#DIV/0!	#DIV/0!	#DIV/0!	#DIV/0!	#DIV/0!	#DIV/0!	#DIV/0!	#DIV/0!	#DIV/0!	#DIV/0!	#DIV/0!	#DIV/0!	#DIV/0!	#DIV/0!	#DIV/0!	#DIV/0!	#DIV/0!
1			0.08					0	0		#DIV/0!	1	1	3	0			1	0	2					0	0	0	0	Col mop	#DIV/0!	#DIV/0!	#DIV/0!	#DIV/0!	#DIV/0!	#DIV/0!	#DIV/0!	#DIV/0!	#DIV/0!	#DIV/0!	#DIV/0!	#DIV/0!	#DIV/0!	#DIV/0!	#DIV/0!	#DIV/0!	#DIV/0!	#DIV/0!	#DIV/0!	#DIV/0!
1		Col mop	0.33					0	0		#DIV/0!	1	1	3	1			1	0	1					0	0	0	0	Col mop	#DIV/0!	#DIV/0!	#DIV/0!	#DIV/0!	#DIV/0!	#DIV/0!	#DIV/0!	#DIV/0!	#DIV/0!	#DIV/0!	#DIV/0!	#DIV/0!	#DIV/0!	#DIV/0!	#DIV/0!	#DIV/0!	#DIV/0!	#DIV/0!	#DIV/0!	#DIV/0!
1	1	Col mop	0.4	3.8	2.7	2.3	3.8	1.25	0	3	3	1	1	2	1			1	0	1					0	0	0	0	Col mop	6.21152	2.14344	3.72655	5.55133	6.15356	6.21242	6.40713	7.41687	48.4632	126.34	266.568	939.253	2.14344	3.72655	5.55133	6.15356	6.21152	6.21152	6.21152	6.21152
1			0.22					0	0		#DIV/0!	1	1	2	0			1	0	1					0	0	0	0	Col mop	#DIV/0!	#DIV/0!	#DIV/0!	#DIV/0!	#DIV/0!	#DIV/0!	#DIV/0!	#DIV/0!	#DIV/0!	#DIV/0!	#DIV/0!	#DIV/0!	#DIV/0!	#DIV/0!	#DIV/0!	#DIV/0!	#DIV/0!	#DIV/0!	#DIV/0!	#DIV/0!
1			0.25					0	0		#DIV/0!	1	0	2	0										0	0	0	0	Col mop	#DIV/0!	#DIV/0!	#DIV/0!	#DIV/0!	#DIV/0!	#DIV/0!	#DIV/0!	#DIV/0!	#DIV/0!	#DIV/0!	#DIV/0!	#DIV/0!	#DIV/0!	#DIV/0!	#DIV/0!	#DIV/0!	#DIV/0!	#DIV/0!	#DIV/0!	#DIV/0!
1			0.22					0	0		#DIV/0!	1	1	3	0										0	0	0	0	Col mop	#DIV/0!	#DIV/0!	#DIV/0!	#DIV/0!	#DIV/0!	#DIV/0!	#DIV/0!	#DIV/0!	#DIV/0!	#DIV/0!	#DIV/0!	#DIV/0!	#DIV/0!	#DIV/0!	#DIV/0!	#DIV/0!	#DIV/0!	#DIV/0!	#DIV/0!	#DIV/0!
1		Col mop	0.3					0	0		#DIV/0!	1	1	3	1			1	0	1					0	0	0	0	Col mop	#DIV/0!	#DIV/0!	#DIV/0!	#DIV/0!	#DIV/0!	#DIV/0!	#DIV/0!	#DIV/0!	#DIV/0!	#DIV/0!	#DIV/0!	#DIV/0!	#DIV/0!	#DIV/0!	#DIV/0!	#DIV/0!	#DIV/0!	#DIV/0!	#DIV/0!	#DIV/0!
1			0.23					0	0		#DIV/0!	1	1	3	0			1	0	2					0	0	0	0	Col mop	#DIV/0!	#DIV/0!	#DIV/0!	#DIV/0!	#DIV/0!	#DIV/0!	#DIV/0!	#DIV/0!	#DIV/0!	#DIV/0!	#DIV/0!	#DIV/0!	#DIV/0!	#DIV/0!	#DIV/0!	#DIV/0!	#DIV/0!	#DIV/0!	#DIV/0!	#DIV/0!
1	1	Col mop	0.3	3.3	1.7	1.7	3.3	0.85	0	1	1	1	1	2	1			1	0	1					0	0	0	0	Col mop	7.49034	1.1349	2.2698	4.5396	6.8094	9.0792	11.349	13.6188	24.9678	31.7772	38.5866	54.4752	1.1349	2.2698	4.5396	6.8094	7.49034	7.49034	7.49034	7.49034
1			0.23					0	0		#DIV/0!	1	1	3	0			1	0	1					0	0	0	0	Col mop	#DIV/0!	#DIV/0!	#DIV/0!	#DIV/0!	#DIV/0!	#DIV/0!	#DIV/0!	#DIV/0!	#DIV/0!	#DIV/0!	#DIV/0!	#DIV/0!	#DIV/0!	#DIV/0!	#DIV/0!	#DIV/0!	#DIV/0!	#DIV/0!	#DIV/0!	#DIV/0!
1			0.12					0	0		#DIV/0!	2	1	4	0										0	0	0	0	Col mop	#DIV/0!	#DIV/0!	#DIV/0!	#DIV/0!	#DIV/0!	#DIV/0!	#DIV/0!	#DIV/0!	#DIV/0!	#DIV/0!	#DIV/0!	#DIV/0!	#DIV/0!	#DIV/0!	#DIV/0!	#DIV/0!	#DIV/0!	#DIV/0!	#DIV/0!	#DIV/0!
1	1	Col mop	0.42	3.6	2.35	2.3	3.6	1.1625	0	3	3	1	1	2	1			1	0	1					0	0	0	0	Col mop	5.08959	1.83976	3.17226	4.64276	5.06602	5.09657	5.38892	6.59761	49.2945	127.798	267.565	931.206	1.83976	3.17226	4.64276	5.06602	5.08959	5.08959	5.08959	5.08959
1			0.2					0	0		#DIV/0!	1	1	2	0			1	0	1					0	0	0	0	Col mop	#DIV/0!	#DIV/0!	#DIV/0!	#DIV/0!	#DIV/0!	#DIV/0!	#DIV/0!	#DIV/0!	#DIV/0!	#DIV/0!	#DIV/0!	#DIV/0!	#DIV/0!	#DIV/0!	#DIV/0!	#DIV/0!	#DIV/0!	#DIV/0!	#DIV/0!	#DIV/0!
1			0.18					0	0		#DIV/0!	1	1	2	0			1	0	1					0	0	0	0	Col mop	#DIV/0!	#DIV/0!	#DIV/0!	#DIV/0!	#DIV/0!	#DIV/0!	#DIV/0!	#DIV/0!	#DIV/0!	#DIV/0!	#DIV/0!	#DIV/0!	#DIV/0!	#DIV/0!	#DIV/0!	#DIV/0!	#DIV/0!	#DIV/0!	#DIV/0!	#DIV/0!
1	1	Col mop	1.68	17.9	10.25	7.75	16.9	4.5	1	3	3	1	1	2	1	1		1	0	1					5.5	0	5.5	0	Col mop	358.019	-32.7262	-7.52626e-14	59.8672	112.658	158.818	198.792	233.026	333.652	353.619	357.965	374.855	0	0	59.8672	112.658	158.818	198.792	233.026	333.652
1	1	Col mop	0.6	6	5.1	5.2	5.5	2.575	0.5	1	1	1	1	2	1			1	0	1					0	0	0	0	Col mop	114.569	0	10.4154	31.2461	52.0768	72.9075	93.7383	114.569	218.723	281.215	343.707	489.522	0	10.4154	31.2461	52.0768	72.9075	93.7383	114.569	114.569
1			0.5					0	0		#DIV/0!	2	1	3	0			1	0	1					0	0	18	0	Col mop	#DIV/0!	#DIV/0!	#DIV/0!	#DIV/0!	#DIV/0!	#DIV/0!	#DIV/0!	#DIV/0!	#DIV/0!	#DIV/0!	#DIV/0!	#DIV/0!	#DIV/0!	#DIV/0!	#DIV/0!	#DIV/0!	#DIV/0!	#DIV/0!	#DIV/0!	#DIV/0!
1	1	Col mop	1.32	5.5	4.1	3.9	4.5	2	1	3	3	2	1	5	1			1	0	2					0	0	0	0	Col mop	18.8307	-7.00017	0	9.97072	15.6018	18.1333	18.8049	18.8565	53.2116	145.738	333.115	1327.24	0	0	9.97072	15.6018	18.1333	18.8049	18.8307	18.8307
1	1	Col mop	0.7	5	4.35	3.75	4.5	2.025	0.5	1	1	1	1	4	1			1	0	1					0	0	0	0	Col mop	57.9712	0	6.44125	19.3237	32.2062	45.0887	57.9712	70.8537	135.266	173.914	212.561	302.739	0	6.44125	19.3237	32.2062	45.0887	57.9712	57.9712	57.9712
1			0.4					0	0		#DIV/0!	1	1	4	0			1	0	2					0	0	0	0	Col mop	#DIV/0!	#DIV/0!	#DIV/0!	#DIV/0!	#DIV/0!	#DIV/0!	#DIV/0!	#DIV/0!	#DIV/0!	#DIV/0!	#DIV/0!	#DIV/0!	#DIV/0!	#DIV/0!	#DIV/0!	#DIV/0!	#DIV/0!	#DIV/0!	#DIV/0!	#DIV/0!
1			0.25					0	0		#DIV/0!	1	1	2	0			1	0	2					0	0	0	0	Col mop	#DIV/0!	#DIV/0!	#DIV/0!	#DIV/0!	#DIV/0!	#DIV/0!	#DIV/0!	#DIV/0!	#DIV/0!	#DIV/0!	#DIV/0!	#DIV/0!	#DIV/0!	#DIV/0!	#DIV/0!	#DIV/0!	#DIV/0!	#DIV/0!	#DIV/0!	#DIV/0!
1	1	Col mop	1.2	4.5	3.95	4.8	3.5	2.1875	1	1	1	2	1	5	1			1	0	2					5.5	0	5.5	0	Col mop	52.6155	-7.51651	0	15.033	30.066	45.099	60.132	75.1651	150.33	195.429	240.528	345.759	0	0	15.033	30.066	45.099	52.6155	52.6155	52.6155
1	1	Col mop	1.2	4.2	3.9	4.9	3.7	2.2	0.5	1	1	2	1	5	1			1	0	2					0	0	0	0	Col mop	56.2596	0	7.60265	22.808	38.0133	53.2186	68.4239	83.6292	159.656	205.272	250.888	357.325	0	7.60265	22.808	38.0133	53.2186	56.2596	56.2596	56.2596
1			0.23					0	0		#DIV/0!	1	1	3	0										0	0	0	0	Col mop	#DIV/0!	#DIV/0!	#DIV/0!	#DIV/0!	#DIV/0!	#DIV/0!	#DIV/0!	#DIV/0!	#DIV/0!	#DIV/0!	#DIV/0!	#DIV/0!	#DIV/0!	#DIV/0!	#DIV/0!	#DIV/0!	#DIV/0!	#DIV/0!	#DIV/0!	#DIV/0!
1	1	Col mop	0.4	4.5	3.9	3.3	4	1.8	0.5	1	1	1	1	3	1			1	0	1					0	0	18	0	Col mop	40.715	0	5.08938	15.2681	25.4469	35.6257	45.8044	55.9832	106.877	137.413	167.95	239.201	0	5.08938	15.2681	25.4469	35.6257	40.715	40.715	40.715
1			0.4					0	0		#DIV/0!	1	1	2	0			1	0	1					0	0	0	0	Col mop	#DIV/0!	#DIV/0!	#DIV/0!	#DIV/0!	#DIV/0!	#DIV/0!	#DIV/0!	#DIV/0!	#DIV/0!	#DIV/0!	#DIV/0!	#DIV/0!	#DIV/0!	#DIV/0!	#DIV/0!	#DIV/0!	#DIV/0!	#DIV/0!	#DIV/0!	#DIV/0!
1	1	Col mop	0.75	4.2	6.6	3.6	3.7	2.55	0.5	2	2	1	1	3	1			1	0	2					0	0	0	0	Col mop	25.1696	0	0.0621128	1.67705	7.7641	21.3047	45.2802	82.6721	575.227	1222.57	2232.15	#DIV/0!	0	0.0621128	1.67705	7.7641	21.3047	25.1696	25.1696	25.1696
1			0.5					0	0		#DIV/0!	2	1	2	0			1	0	1					0	0	0	0	Col mop	#DIV/0!	#DIV/0!	#DIV/0!	#DIV/0!	#DIV/0!	#DIV/0!	#DIV/0!	#DIV/0!	#DIV/0!	#DIV/0!	#DIV/0!	#DIV/0!	#DIV/0!	#DIV/0!	#DIV/0!	#DIV/0!	#DIV/0!	#DIV/0!	#DIV/0!	#DIV/0!
1			0.42					0	0		#DIV/0!	2	1	2	0			1	0	1					0	0	0	0	Col mop	#DIV/0!	#DIV/0!	#DIV/0!	#DIV/0!	#DIV/0!	#DIV/0!	#DIV/0!	#DIV/0!	#DIV/0!	#DIV/0!	#DIV/0!	#DIV/0!	#DIV/0!	#DIV/0!	#DIV/0!	#DIV/0!	#DIV/0!	#DIV/0!	#DIV/0!	#DIV/0!
1			0.8					0	0		#DIV/0!	2	1	5	0			1	0	1					0	0	0	0	Col mop	#DIV/0!	#DIV/0!	#DIV/0!	#DIV/0!	#DIV/0!	#DIV/0!	#DIV/0!	#DIV/0!	#DIV/0!	#DIV/0!	#DIV/0!	#DIV/0!	#DIV/0!	#DIV/0!	#DIV/0!	#DIV/0!	#DIV/0!	#DIV/0!	#DIV/0!	#DIV/0!
1	1	Col mop	0.35	3.4	2.1	2.6	3.4	1.175	0	1	1	1	1	3	1			1	0	2					0	0	0	0	Col mop	14.747	2.16868	4.33736	8.67472	13.0121	17.3494	21.6868	26.0242	47.711	60.7231	73.7351	104.097	2.16868	4.33736	8.67472	13.0121	14.747	14.747	14.747	14.747
1		Col mop	0.45					0	0		#DIV/0!	2	1	2	1			1	0	2					0	0	0	0	Col mop	#DIV/0!	#DIV/0!	#DIV/0!	#DIV/0!	#DIV/0!	#DIV/0!	#DIV/0!	#DIV/0!	#DIV/0!	#DIV/0!	#DIV/0!	#DIV/0!	#DIV/0!	#DIV/0!	#DIV/0!	#DIV/0!	#DIV/0!	#DIV/0!	#DIV/0!	#DIV/0!
1	1	Col mop	0.56	4.2	3.1	3	3.2	1.525	1	1	1	1	1	3	1			1	0	2					0	0	0	0	Col mop	23.3797	-3.65308	0	7.30617	14.6123	21.9185	29.2247	36.5308	73.0617	94.9802	116.899	168.042	0	0	7.30617	14.6123	21.9185	23.3797	23.3797	23.3797
1	1	Col mop	0.32	5	3.3	1.8	4.5	1.275	0.5	1	1	1	1	2	1			1	0	1					0	0	0	0	Col mop	22.9817	0	2.55353	7.66058	12.7676	17.8747	22.9817	28.0888	53.624	68.9452	84.2664	120.016	0	2.55353	7.66058	12.7676	17.8747	22.9817	22.9817	22.9817
1			0.4					0	0		#DIV/0!	1	1	2	0			1	0	1					0	0	0	0	Col mop	#DIV/0!	#DIV/0!	#DIV/0!	#DIV/0!	#DIV/0!	#DIV/0!	#DIV/0!	#DIV/0!	#DIV/0!	#DIV/0!	#DIV/0!	#DIV/0!	#DIV/0!	#DIV/0!	#DIV/0!	#DIV/0!	#DIV/0!	#DIV/0!	#DIV/0!	#DIV/0!
1			0.32					0	0		#DIV/0!	2	1	5	0			1	0	1					0	0	0	0	Col mop	#DIV/0!	#DIV/0!	#DIV/0!	#DIV/0!	#DIV/0!	#DIV/0!	#DIV/0!	#DIV/0!	#DIV/0!	#DIV/0!	#DIV/0!	#DIV/0!	#DIV/0!	#DIV/0!	#DIV/0!	#DIV/0!	#DIV/0!	#DIV/0!	#DIV/0!	#DIV/0!
1			0.14					0	0		#DIV/0!	2	1	5	0										0	0	0	0	Col mop	#DIV/0!	#DIV/0!	#DIV/0!	#DIV/0!	#DIV/0!	#DIV/0!	#DIV/0!	#DIV/0!	#DIV/0!	#DIV/0!	#DIV/0!	#DIV/0!	#DIV/0!	#DIV/0!	#DIV/0!	#DIV/0!	#DIV/0!	#DIV/0!	#DIV/0!	#DIV/0!
1			0.4					0	0		#DIV/0!	1	1	3	0			1	0	1					0	0	0	0	Col mop	#DIV/0!	#DIV/0!	#DIV/0!	#DIV/0!	#DIV/0!	#DIV/0!	#DIV/0!	#DIV/0!	#DIV/0!	#DIV/0!	#DIV/0!	#DIV/0!	#DIV/0!	#DIV/0!	#DIV/0!	#DIV/0!	#DIV/0!	#DIV/0!	#DIV/0!	#DIV/0!
1	1	Col mop	0.37	3.8	2.5	2.2	3.8	1.175	0	3	3	1	1	3	1			1	0	2					0	0	0	0	Col mop	5.4885	1.89395	3.29278	4.90516	5.43728	5.4893	5.66134	6.55355	42.8221	111.634	235.54	829.924	1.89395	3.29278	4.90516	5.43728	5.4885	5.4885	5.4885	5.4885
1			0.3					0	0		#DIV/0!	1	1	2	0			1	0	1					0	0	0	0	Col mop	#DIV/0!	#DIV/0!	#DIV/0!	#DIV/0!	#DIV/0!	#DIV/0!	#DIV/0!	#DIV/0!	#DIV/0!	#DIV/0!	#DIV/0!	#DIV/0!	#DIV/0!	#DIV/0!	#DIV/0!	#DIV/0!	#DIV/0!	#DIV/0!	#DIV/0!	#DIV/0!
1	1	Col mop	0.47	3.5	2.3	2.1	3.5	1.1	0	1	1	1	1	4	1			1	0	2					0	0	0	0	Col mop	13.3046	1.90066	3.80133	7.60265	11.404	15.2053	19.0066	22.808	41.8146	53.2186	64.6226	91.2319	1.90066	3.80133	7.60265	11.404	13.3046	13.3046	13.3046	13.3046
1			0.2					0	0		#DIV/0!	1	1	2	0			1	0	1					0	0	0	0	Col mop	#DIV/0!	#DIV/0!	#DIV/0!	#DIV/0!	#DIV/0!	#DIV/0!	#DIV/0!	#DIV/0!	#DIV/0!	#DIV/0!	#DIV/0!	#DIV/0!	#DIV/0!	#DIV/0!	#DIV/0!	#DIV/0!	#DIV/0!	#DIV/0!	#DIV/0!	#DIV/0!
1			0.12					0	0		#DIV/0!	1	0	1	0										0	0	0	0	Col mop	#DIV/0!	#DIV/0!	#DIV/0!	#DIV/0!	#DIV/0!	#DIV/0!	#DIV/0!	#DIV/0!	#DIV/0!	#DIV/0!	#DIV/0!	#DIV/0!	#DIV/0!	#DIV/0!	#DIV/0!	#DIV/0!	#DIV/0!	#DIV/0!	#DIV/0!	#DIV/0!
1			0.12					0	0		#DIV/0!				0			2	0	4					0	0	0	0	Col mop	#DIV/0!	#DIV/0!	#DIV/0!	#DIV/0!	#DIV/0!	#DIV/0!	#DIV/0!	#DIV/0!	#DIV/0!	#DIV/0!	#DIV/0!	#DIV/0!	#DIV/0!	#DIV/0!	#DIV/0!	#DIV/0!	#DIV/0!	#DIV/0!	#DIV/0!	#DIV/0!
1			0.1					0	0		#DIV/0!	1	0	3	0			1	0	2					0	0	0	0	Col mop	#DIV/0!	#DIV/0!	#DIV/0!	#DIV/0!	#DIV/0!	#DIV/0!	#DIV/0!	#DIV/0!	#DIV/0!	#DIV/0!	#DIV/0!	#DIV/0!	#DIV/0!	#DIV/0!	#DIV/0!	#DIV/0!	#DIV/0!	#DIV/0!	#DIV/0!	#DIV/0!
1			0.16					0	0		#DIV/0!	1	1	3	0			1	0	1					0	0	0	0	Col mop	#DIV/0!	#DIV/0!	#DIV/0!	#DIV/0!	#DIV/0!	#DIV/0!	#DIV/0!	#DIV/0!	#DIV/0!	#DIV/0!	#DIV/0!	#DIV/0!	#DIV/0!	#DIV/0!	#DIV/0!	#DIV/0!	#DIV/0!	#DIV/0!	#DIV/0!	#DIV/0!
1	1	Col mop	0.42	4.4	2.7	3.45	4.4	1.5375	0	1	1	1	1	3	1			1	0	2					0	0	0	0	Col mop	32.6763	3.71322	7.42643	14.8529	22.2793	29.7057	37.1322	44.5586	81.6907	103.97	126.249	178.234	3.71322	7.42643	14.8529	22.2793	29.7057	32.6763	32.6763	32.6763
1			0.35					0	0		#DIV/0!	1	1	3	0			1	0	2					0	0	0	0	Col mop	#DIV/0!	#DIV/0!	#DIV/0!	#DIV/0!	#DIV/0!	#DIV/0!	#DIV/0!	#DIV/0!	#DIV/0!	#DIV/0!	#DIV/0!	#DIV/0!	#DIV/0!	#DIV/0!	#DIV/0!	#DIV/0!	#DIV/0!	#DIV/0!	#DIV/0!	#DIV/0!
1	1	Col mop	0.45	3.7	2.9	3.5	3.7	1.6	0	1	1	1	1	3	1			1	0	2					0	0	0	0	Col mop	29.7572	4.02124	8.04248	16.085	24.1274	32.1699	40.2124	48.2549	88.4672	112.595	136.722	193.019	4.02124	8.04248	16.085	24.1274	29.7572	29.7572	29.7572	29.7572
1			0.25					0	0		#DIV/0!	1	1	4	0			1	0	2					0	0	0	0	Col mop	#DIV/0!	#DIV/0!	#DIV/0!	#DIV/0!	#DIV/0!	#DIV/0!	#DIV/0!	#DIV/0!	#DIV/0!	#DIV/0!	#DIV/0!	#DIV/0!	#DIV/0!	#DIV/0!	#DIV/0!	#DIV/0!	#DIV/0!	#DIV/0!	#DIV/0!	#DIV/0!
1			0.3					0	0		#DIV/0!	1	1	4	0			1	0	2					0	0	0	0	Col mop	#DIV/0!	#DIV/0!	#DIV/0!	#DIV/0!	#DIV/0!	#DIV/0!	#DIV/0!	#DIV/0!	#DIV/0!	#DIV/0!	#DIV/0!	#DIV/0!	#DIV/0!	#DIV/0!	#DIV/0!	#DIV/0!	#DIV/0!	#DIV/0!	#DIV/0!	#DIV/0!
1	1	Col mop	1.15	11.4	6	4.5	10.4	2.625	1	7	7	1	1	4	1			1	0	1					0	0	0	0	Col mop	206.155	-10.8238	0	21.6475	43.2951	64.9426	86.5901	108.238	204.904	132.076	-235.923	-3194.47	0	0	21.6475	43.2951	64.9426	86.5901	108.238	204.904
1			0.54					0	0		#DIV/0!	1	1	4	0			1	0	2					0	0	0	0	Col mop	#DIV/0!	#DIV/0!	#DIV/0!	#DIV/0!	#DIV/0!	#DIV/0!	#DIV/0!	#DIV/0!	#DIV/0!	#DIV/0!	#DIV/0!	#DIV/0!	#DIV/0!	#DIV/0!	#DIV/0!	#DIV/0!	#DIV/0!	#DIV/0!	#DIV/0!	#DIV/0!
1	1	Col mop	0.54	4.2	3.3	3.65	4.2	1.7375	0	1	1	1	1	3	1			1	0	2					0	0	0	0	Col mop	39.8335	4.74209	9.48417	18.9683	28.4525	37.9367	47.4209	56.905	104.326	132.778	161.231	227.62	4.74209	9.48417	18.9683	28.4525	37.9367	39.8335	39.8335	39.8335
1			0.42					0	0		#DIV/0!	1	1	4	0			1	0	2					0	0	0	0	Col mop	#DIV/0!	#DIV/0!	#DIV/0!	#DIV/0!	#DIV/0!	#DIV/0!	#DIV/0!	#DIV/0!	#DIV/0!	#DIV/0!	#DIV/0!	#DIV/0!	#DIV/0!	#DIV/0!	#DIV/0!	#DIV/0!	#DIV/0!	#DIV/0!	#DIV/0!	#DIV/0!
1	1	Col mop	0.67	4.5	4.15	4.1	4	2.0625	0.5	1	1	1	1	3	1			1	0	2					0	0	0	0	Col mop	53.4562	0	6.68202	20.0461	33.4101	46.7741	60.1382	73.5022	140.322	180.415	220.507	314.055	0	6.68202	20.0461	33.4101	46.7741	53.4562	53.4562	53.4562
1			0.23					0	0		#DIV/0!	1	1	4	0			1	0	2					0	0	0	0	Col mop	#DIV/0!	#DIV/0!	#DIV/0!	#DIV/0!	#DIV/0!	#DIV/0!	#DIV/0!	#DIV/0!	#DIV/0!	#DIV/0!	#DIV/0!	#DIV/0!	#DIV/0!	#DIV/0!	#DIV/0!	#DIV/0!	#DIV/0!	#DIV/0!	#DIV/0!	#DIV/0!
1			0.16					0	0		#DIV/0!	2	0	7	0										0	0	0	0	Col mop	#DIV/0!	#DIV/0!	#DIV/0!	#DIV/0!	#DIV/0!	#DIV/0!	#DIV/0!	#DIV/0!	#DIV/0!	#DIV/0!	#DIV/0!	#DIV/0!	#DIV/0!	#DIV/0!	#DIV/0!	#DIV/0!	#DIV/0!	#DIV/0!	#DIV/0!	#DIV/0!
1	1	Col mop	0.32	4.4	4.35	2.7	4.4	1.7625	0	1	1	1	1	2	1			1	0	1					0	0	0	0	Col mop	42.9399	4.87953	9.75906	19.5181	29.2772	39.0363	48.7953	58.5544	107.35	136.627	165.904	234.218	4.87953	9.75906	19.5181	29.2772	39.0363	42.9399	42.9399	42.9399
1			0.4					0	0		#DIV/0!	1	1	2	0			1	0	1					0	0	0	0	Col mop	#DIV/0!	#DIV/0!	#DIV/0!	#DIV/0!	#DIV/0!	#DIV/0!	#DIV/0!	#DIV/0!	#DIV/0!	#DIV/0!	#DIV/0!	#DIV/0!	#DIV/0!	#DIV/0!	#DIV/0!	#DIV/0!	#DIV/0!	#DIV/0!	#DIV/0!	#DIV/0!
1			0.16					0	0		#DIV/0!	1	1	4	0										0	0	0	0	Col mop	#DIV/0!	#DIV/0!	#DIV/0!	#DIV/0!	#DIV/0!	#DIV/0!	#DIV/0!	#DIV/0!	#DIV/0!	#DIV/0!	#DIV/0!	#DIV/0!	#DIV/0!	#DIV/0!	#DIV/0!	#DIV/0!	#DIV/0!	#DIV/0!	#DIV/0!	#DIV/0!
1			0.1					0	0		#DIV/0!	1	1	2	0										0	0	0	0	Col mop	#DIV/0!	#DIV/0!	#DIV/0!	#DIV/0!	#DIV/0!	#DIV/0!	#DIV/0!	#DIV/0!	#DIV/0!	#DIV/0!	#DIV/0!	#DIV/0!	#DIV/0!	#DIV/0!	#DIV/0!	#DIV/0!	#DIV/0!	#DIV/0!	#DIV/0!	#DIV/0!
1			0.2					0	0		#DIV/0!	1	0	5	0										0	0	0	0	Col mop	#DIV/0!	#DIV/0!	#DIV/0!	#DIV/0!	#DIV/0!	#DIV/0!	#DIV/0!	#DIV/0!	#DIV/0!	#DIV/0!	#DIV/0!	#DIV/0!	#DIV/0!	#DIV/0!	#DIV/0!	#DIV/0!	#DIV/0!	#DIV/0!	#DIV/0!	#DIV/0!
2	1	Col mopA	1.85	16	8.7	9.7	15	4.6	1	7	7	1	1	2	1	2		1	0	1					18	0	5.5	0	Col mopA	895.008	-33.2381	0	66.4761	132.952	199.428	265.904	332.381	664.761	845.629	879.525	-564.581	0	0	66.4761	132.952	199.428	265.904	332.381	664.761
2			0.7					0	0		#DIV/0!	1	1	3	0			1	0	1					0	0	0	0	Col mopA	#DIV/0!	#DIV/0!	#DIV/0!	#DIV/0!	#DIV/0!	#DIV/0!	#DIV/0!	#DIV/0!	#DIV/0!	#DIV/0!	#DIV/0!	#DIV/0!	#DIV/0!	#DIV/0!	#DIV/0!	#DIV/0!	#DIV/0!	#DIV/0!	#DIV/0!	#DIV/0!
2	1	Col mopA	1.8	14	6	7.4	13	3.35	1	7	7	1	1	2	1			1	0	1					5.5	0	5.5	0	Col mopA	418.886	-17.6283	0	35.2565	70.513	105.77	141.026	176.283	352.508	418.886	296.016	-1678.65	0	0	35.2565	70.513	105.77	141.026	176.283	352.508
2	1	Col mopA	1.65	13.6	3.9	3.8	13.6	1.925	0	3	3			5	1			1	0	1					83	0	0	0	Col mopA	52.7223	5.6038	10.7957	20.007	27.7594	34.1788	39.391	43.5217	52.3539	52.7237	53.5461	76.2987	5.6038	10.7957	20.007	27.7594	34.1788	39.391	43.5217	52.3539
2	1	Col mopA	1.58	20	8.02	8.2	15.5	4.055	4.5	3	3	1	1	1	1	1		1	0	1					63	0	0	0	Col mopA	266.629	-264.275	-224.475	-150.942	-85.1412	-26.6441	24.9794	70.159	214.433	251.164	264.696	271.211	0	0	0	0	0	24.9794	70.159	214.433
2			0.9					0	0		#DIV/0!	1	1	4	0			1	0	1					0	0	0	0	Col mopA	#DIV/0!	#DIV/0!	#DIV/0!	#DIV/0!	#DIV/0!	#DIV/0!	#DIV/0!	#DIV/0!	#DIV/0!	#DIV/0!	#DIV/0!	#DIV/0!	#DIV/0!	#DIV/0!	#DIV/0!	#DIV/0!	#DIV/0!	#DIV/0!	#DIV/0!	#DIV/0!
2	1	Col mopA	1.45	16.2	9.4	8.68	16.2	4.52	0	3	3	1	0	1	1	1		1	0	1					18	0	18	0	Col mopA	346.247	31.0806	60.2432	113.059	158.936	198.363	231.829	259.822	334.796	345.38	346.289	384.895	31.0806	60.2432	113.059	158.936	198.363	231.829	259.822	334.796
2			0.9					0	0		#DIV/0!	2	1	2	0			1	0	2					0	0	0	0	Col mopA	#DIV/0!	#DIV/0!	#DIV/0!	#DIV/0!	#DIV/0!	#DIV/0!	#DIV/0!	#DIV/0!	#DIV/0!	#DIV/0!	#DIV/0!	#DIV/0!	#DIV/0!	#DIV/0!	#DIV/0!	#DIV/0!	#DIV/0!	#DIV/0!	#DIV/0!	#DIV/0!
2	1	Col mopA	1.42	13.7	7.05	7.2	13.7	3.5625	0	3	3	1	1	3	1	1		1	0	1					18	0	0	0	Col mopA	181.897	19.1977	36.9947	68.599	95.2375	117.334	135.314	149.602	180.504	181.898	184.439	259.196	19.1977	36.9947	68.599	95.2375	117.334	135.314	149.602	180.504
2	1	Col mopA	1.36	16.1	11.6	9.18	13.1	5.195	3	3	3	1	0	1	1	1		1	0	1					18	0	0	0	Col mopA	369.859	-254.733	-196.58	-91.3308	-2.00611e-13	78.3994	144.855	200.353	348.035	368.336	369.979	450.975	0	0	0	0	78.3994	144.855	200.353	348.035
2			1.3					0	0		#DIV/0!				0	1									0	0	0	0	Col mopA	#DIV/0!	#DIV/0!	#DIV/0!	#DIV/0!	#DIV/0!	#DIV/0!	#DIV/0!	#DIV/0!	#DIV/0!	#DIV/0!	#DIV/0!	#DIV/0!	#DIV/0!	#DIV/0!	#DIV/0!	#DIV/0!	#DIV/0!	#DIV/0!	#DIV/0!	#DIV/0!
2	1	Col mopA	2	18.1	7.25	8.5	18.1	3.9375	0	3	3	1	1	1	1	1		1	0	1					38	0	18	0	Col mopA	293.571	23.6632	46.0195	86.9594	123.117	154.789	182.272	205.864	275.852	290.159	293.506	303.739	23.6632	46.0195	86.9594	123.117	154.789	182.272	205.864	275.852
2	1	Col mopA	1.6	19.5	7.6	6.95	15.5	3.6375	4	3	3	1	1	1	1	1		1	0	1					63	0	18	0	Col mopA	214.552	-180.631	-150.246	-94.2296	-44.2628	-2.45884e-14	38.9046	72.7967	179.169	204.966	213.651	219.802	0	0	0	0	0	38.9046	72.7967	179.169
2	1	Col mopA	1.48	18	8.3	7.6	18	3.975	0	3	3	1	1	1	1	1		1	0	1					38	0	0	0	Col mopA	297.537	24.1124	46.8855	88.5672	125.351	157.544	185.45	209.378	280.038	294.272	297.486	308.557	24.1124	46.8855	88.5672	125.351	157.544	185.45	209.378	280.038
2			0.84					0	0		#DIV/0!	2	1	5	0			1	0	2					0	0	0	0	Col mopA	#DIV/0!	#DIV/0!	#DIV/0!	#DIV/0!	#DIV/0!	#DIV/0!	#DIV/0!	#DIV/0!	#DIV/0!	#DIV/0!	#DIV/0!	#DIV/0!	#DIV/0!	#DIV/0!	#DIV/0!	#DIV/0!	#DIV/0!	#DIV/0!	#DIV/0!	#DIV/0!
[truncated: 68 more columns]

## Sheet: Site5
Date:	23/8/2014														Tree density ≤ 10m (no/ha)	192
Trans. No.:	GNP7														Tree density > 10m (no/ha)	16
			Transect 1									Transect 2 for Tall Trees (GPS coordinates)			Tree height (m)	#REF!
			Width (m)	Length (m)	Area (ha)							Initial	Extension	Total area (ha)	Lower level of canopy (m)	#REF!
	Transect Dimensions:		25	50	0.125							1388.07	3939.77	0.532784
	Co-ordinates:			X	Y								X	Y
			NW Corner									NW Corner
			SW Corner									SW Corner
			NE Corner									NE Corner
			SE Corner									SE Corner
			Max
			2	18								OED				OUD	DRT	NED				NUD	NFD	OFD	OBE	OBU	NBE	NBU	RE	Canopy volume (m3) up to specified height class	Height classes (m)
Trans. No.	Tree	Sp. Code	Stem Circum.(cm)	Height (m)	D1 (m)	D2 (m)	CD (m)	R	Y	Shape	Adj. Shape	F	C	S	Tree			F	C	S	E									Total	0.5	1	2	3	4	5	6	11	14	17	24	0.5	1	2	3	4	5	6	11
1	1	Col mop	0.9	4.6	9.6	4.7	4.6	3.575	0	2	2	2	1	4	1			1	0	3					0	0	0	0	Col mop	61.5041	0.0789843	0.631874	5.05499	17.0606	40.4399	78.9843	136.485	841.024	1733.86	3104.4	8735.03	0.0789843	0.631874	5.05499	17.0606	40.4399	61.5041	61.5041	61.5041
1			0.9					0	0		#DIV/0!	1	3		0			1	0	2					0	0	0	0	Col mop	#DIV/0!	#DIV/0!	#DIV/0!	#DIV/0!	#DIV/0!	#DIV/0!	#DIV/0!	#DIV/0!	#DIV/0!	#DIV/0!	#DIV/0!	#DIV/0!	#DIV/0!	#DIV/0!	#DIV/0!	#DIV/0!	#DIV/0!	#DIV/0!	#DIV/0!	#DIV/0!
1	1	Col mop	0.93	3.8	5.5	3.6	3.3	2.275	0.5	1	1	1	1	3	1			1	0	2					0	0	0	0	Col mop	53.657	0	8.12985	24.3896	40.6493	56.909	73.1687	89.4284	170.727	219.506	268.285	382.103	0	8.12985	24.3896	40.6493	53.657	53.657	53.657	53.657
1		Col mop	0.7					0	0		#DIV/0!	2	1	5	1			1	0	1					0	0	0	0	Col mop	#DIV/0!	#DIV/0!	#DIV/0!	#DIV/0!	#DIV/0!	#DIV/0!	#DIV/0!	#DIV/0!	#DIV/0!	#DIV/0!	#DIV/0!	#DIV/0!	#DIV/0!	#DIV/0!	#DIV/0!	#DIV/0!	#DIV/0!	#DIV/0!	#DIV/0!	#DIV/0!
1	1	Col mop	0.32	4	2.2	3.6	3.5	1.45	0.5	1	1	1	1	2	1										0	0	0	0	Col mop	23.1182	0	3.3026	9.9078	16.513	23.1182	29.7234	36.3286	69.3546	89.1702	108.986	155.222	0	3.3026	9.9078	16.513	23.1182	23.1182	23.1182	23.1182
1			0.18					0	0		#DIV/0!	1	1	2	0										0	0	0	0	Col mop	#DIV/0!	#DIV/0!	#DIV/0!	#DIV/0!	#DIV/0!	#DIV/0!	#DIV/0!	#DIV/0!	#DIV/0!	#DIV/0!	#DIV/0!	#DIV/0!	#DIV/0!	#DIV/0!	#DIV/0!	#DIV/0!	#DIV/0!	#DIV/0!	#DIV/0!	#DIV/0!
1	1	Col mop	0.82	4	5.65	4.7	3.5	2.5875	0.5	1	1	2	1	5	1			1	0	3					0	0	0	0	Col mop	73.6171	0	10.5167	31.5502	52.5836	73.6171	94.6505	115.684	220.851	283.952	347.052	494.286	0	10.5167	31.5502	52.5836	73.6171	73.6171	73.6171	73.6171
1			0.44					0	0		#DIV/0!	1	1	2	0			1	0	1					0	0	0	0	Col mop	#DIV/0!	#DIV/0!	#DIV/0!	#DIV/0!	#DIV/0!	#DIV/0!	#DIV/0!	#DIV/0!	#DIV/0!	#DIV/0!	#DIV/0!	#DIV/0!	#DIV/0!	#DIV/0!	#DIV/0!	#DIV/0!	#DIV/0!	#DIV/0!	#DIV/0!	#DIV/0!
1	1	Col mop	0.33	3.6	3.2	4.2	2.6	1.85	1	3	3	1	1	2	1										0	0	0	0	Col mop	9.30917	-6.4697	0	7.13971	9.19476	9.34307	10.7625	16.6311	223.937	605.096	1283.71	4505.88	0	0	7.13971	9.19476	9.30917	9.30917	9.30917	9.30917
1			0.32					0	0		#DIV/0!	1	1	2	0			1	0	1					0	0	0	0	Col mop	#DIV/0!	#DIV/0!	#DIV/0!	#DIV/0!	#DIV/0!	#DIV/0!	#DIV/0!	#DIV/0!	#DIV/0!	#DIV/0!	#DIV/0!	#DIV/0!	#DIV/0!	#DIV/0!	#DIV/0!	#DIV/0!	#DIV/0!	#DIV/0!	#DIV/0!	#DIV/0!
1	1	Col mop	0.6	3.8	4.05	3.85	2.8	1.975	1	1	1	2	1	4	1			1	0	3					0	0	0	0	Col mop	34.3117	-6.12709	0	12.2542	24.5083	36.7625	49.0167	61.2709	122.542	159.304	196.067	281.846	0	0	12.2542	24.5083	34.3117	34.3117	34.3117	34.3117
1			0.22					0	0		#DIV/0!	1	0	1	0										0	0	0	0	Col mop	#DIV/0!	#DIV/0!	#DIV/0!	#DIV/0!	#DIV/0!	#DIV/0!	#DIV/0!	#DIV/0!	#DIV/0!	#DIV/0!	#DIV/0!	#DIV/0!	#DIV/0!	#DIV/0!	#DIV/0!	#DIV/0!	#DIV/0!	#DIV/0!	#DIV/0!	#DIV/0!
1			0.6					0	0		#DIV/0!	2	1	5	0			1	0	1					0	0	0	0	Col mop	#DIV/0!	#DIV/0!	#DIV/0!	#DIV/0!	#DIV/0!	#DIV/0!	#DIV/0!	#DIV/0!	#DIV/0!	#DIV/0!	#DIV/0!	#DIV/0!	#DIV/0!	#DIV/0!	#DIV/0!	#DIV/0!	#DIV/0!	#DIV/0!	#DIV/0!	#DIV/0!
1	1	Col mop	0.65	5	3.98	3.2	4.5	1.795	0.5	1	1	1	1	4	1			1	0	2					0	0	0	0	Col mop	45.5503	0	5.06115	15.1834	25.3057	35.428	45.5503	55.6726	106.284	136.651	167.018	237.874	0	5.06115	15.1834	25.3057	35.428	45.5503	45.5503	45.5503
1			0.33					0	0		#DIV/0!	1	1	3	0			1	0	1					0	0	0	0	Col mop	#DIV/0!	#DIV/0!	#DIV/0!	#DIV/0!	#DIV/0!	#DIV/0!	#DIV/0!	#DIV/0!	#DIV/0!	#DIV/0!	#DIV/0!	#DIV/0!	#DIV/0!	#DIV/0!	#DIV/0!	#DIV/0!	#DIV/0!	#DIV/0!	#DIV/0!	#DIV/0!
1			0.33					0	0		#DIV/0!	1	1	2	0			1	0	1					0	0	0	0	Col mop	#DIV/0!	#DIV/0!	#DIV/0!	#DIV/0!	#DIV/0!	#DIV/0!	#DIV/0!	#DIV/0!	#DIV/0!	#DIV/0!	#DIV/0!	#DIV/0!	#DIV/0!	#DIV/0!	#DIV/0!	#DIV/0!	#DIV/0!	#DIV/0!	#DIV/0!	#DIV/0!
1			0.32					0	0		#DIV/0!	1	1	2	0			1	0	1					0	0	0	0	Col mop	#DIV/0!	#DIV/0!	#DIV/0!	#DIV/0!	#DIV/0!	#DIV/0!	#DIV/0!	#DIV/0!	#DIV/0!	#DIV/0!	#DIV/0!	#DIV/0!	#DIV/0!	#DIV/0!	#DIV/0!	#DIV/0!	#DIV/0!	#DIV/0!	#DIV/0!	#DIV/0!
1			0.22					0	0		#DIV/0!	2	0	7	0										0	0	0	0	Col mop	#DIV/0!	#DIV/0!	#DIV/0!	#DIV/0!	#DIV/0!	#DIV/0!	#DIV/0!	#DIV/0!	#DIV/0!	#DIV/0!	#DIV/0!	#DIV/0!	#DIV/0!	#DIV/0!	#DIV/0!	#DIV/0!	#DIV/0!	#DIV/0!	#DIV/0!	#DIV/0!
1		Col mop	1.8					0	0		#DIV/0!	4	1	4	1			1	0	1					0	0	0	0	Col mop	#DIV/0!	#DIV/0!	#DIV/0!	#DIV/0!	#DIV/0!	#DIV/0!	#DIV/0!	#DIV/0!	#DIV/0!	#DIV/0!	#DIV/0!	#DIV/0!	#DIV/0!	#DIV/0!	#DIV/0!	#DIV/0!	#DIV/0!	#DIV/0!	#DIV/0!	#DIV/0!
1	1	Dri mos	1	4	5.7	5.9	4	2.9	0	1	1	1	0	2	1	1									0	0	0	0	Dri mos	105.683	13.2104	26.4208	52.8416	79.2624	105.683	132.104	158.525	290.629	369.891	449.154	634.099	13.2104	26.4208	52.8416	79.2624	105.683	105.683	105.683	105.683
1		Col mop	1					0	0		#DIV/0!	2	1	4	1			1	0	2					0	0	0	0	Col mop	#DIV/0!	#DIV/0!	#DIV/0!	#DIV/0!	#DIV/0!	#DIV/0!	#DIV/0!	#DIV/0!	#DIV/0!	#DIV/0!	#DIV/0!	#DIV/0!	#DIV/0!	#DIV/0!	#DIV/0!	#DIV/0!	#DIV/0!	#DIV/0!	#DIV/0!	#DIV/0!
1		Col mop	0.75					0	0		#DIV/0!	2	0	7	1										0	0	0	0	Col mop	#DIV/0!	#DIV/0!	#DIV/0!	#DIV/0!	#DIV/0!	#DIV/0!	#DIV/0!	#DIV/0!	#DIV/0!	#DIV/0!	#DIV/0!	#DIV/0!	#DIV/0!	#DIV/0!	#DIV/0!	#DIV/0!	#DIV/0!	#DIV/0!	#DIV/0!	#DIV/0!
1		Col mop	0.8					0	0		#DIV/0!	2	0	7	1										0	0	0	0	Col mop	#DIV/0!	#DIV/0!	#DIV/0!	#DIV/0!	#DIV/0!	#DIV/0!	#DIV/0!	#DIV/0!	#DIV/0!	#DIV/0!	#DIV/0!	#DIV/0!	#DIV/0!	#DIV/0!	#DIV/0!	#DIV/0!	#DIV/0!	#DIV/0!	#DIV/0!	#DIV/0!
1	1	Col mop	0.52	5	4.35	4.85	5	2.3	0	1	1	1	1	2	1			1	0	1					0	0	0	0	Col mop	83.0951	8.30951	16.619	33.2381	49.8571	66.4761	83.0951	99.7142	182.809	232.666	282.523	398.857	8.30951	16.619	33.2381	49.8571	66.4761	83.0951	83.0951	83.0951
1			0.3					0	0		#DIV/0!	1	1	3	0										0	0	0	0	Col mop	#DIV/0!	#DIV/0!	#DIV/0!	#DIV/0!	#DIV/0!	#DIV/0!	#DIV/0!	#DIV/0!	#DIV/0!	#DIV/0!	#DIV/0!	#DIV/0!	#DIV/0!	#DIV/0!	#DIV/0!	#DIV/0!	#DIV/0!	#DIV/0!	#DIV/0!	#DIV/0!
1			0.18					0	0		#DIV/0!	1	1	2	0										0	0	0	0	Col mop	#DIV/0!	#DIV/0!	#DIV/0!	#DIV/0!	#DIV/0!	#DIV/0!	#DIV/0!	#DIV/0!	#DIV/0!	#DIV/0!	#DIV/0!	#DIV/0!	#DIV/0!	#DIV/0!	#DIV/0!	#DIV/0!	#DIV/0!	#DIV/0!	#DIV/0!	#DIV/0!
1	1	Col mop	1.9	15.8	8.8	9.98	13.8	4.695	2	3	3	1	1	1	1	2		1	0	1					38	0	0	0	Col mop	318.232	-115.46	-74.3152	-4.09634e-14	64.2889	119.278	165.694	204.264	304.841	317.526	318.442	384.997	0	0	0	64.2889	119.278	165.694	204.264	304.841
1	1	Col mop	1.35	4.7	4.2	4.1	4.7	2.075	0	1	1	1	1	4	1			1	0	2					0	0	0	0	Col mop	63.5746	6.76326	13.5265	27.053	40.5796	54.1061	67.6326	81.1591	148.792	189.371	229.951	324.636	6.76326	13.5265	27.053	40.5796	54.1061	63.5746	63.5746	63.5746
1			0.2					0	0		#DIV/0!	1	0	2	0			1	0	1					0	0	0	0	Col mop	#DIV/0!	#DIV/0!	#DIV/0!	#DIV/0!	#DIV/0!	#DIV/0!	#DIV/0!	#DIV/0!	#DIV/0!	#DIV/0!	#DIV/0!	#DIV/0!	#DIV/0!	#DIV/0!	#DIV/0!	#DIV/0!	#DIV/0!	#DIV/0!	#DIV/0!	#DIV/0!
1			0.13					0	0		#DIV/0!	1	1	2	0			1	0	1					0	0	0	0	Col mop	#DIV/0!	#DIV/0!	#DIV/0!	#DIV/0!	#DIV/0!	#DIV/0!	#DIV/0!	#DIV/0!	#DIV/0!	#DIV/0!	#DIV/0!	#DIV/0!	#DIV/0!	#DIV/0!	#DIV/0!	#DIV/0!	#DIV/0!	#DIV/0!	#DIV/0!	#DIV/0!
1	1	Col mop	1.5	16.8	8.53	7.8	16.8	4.0825	0	3	3	1	0	1	1	1									0	0	0	0	Col mop	292.925	25.3833	49.2562	92.6559	130.57	163.368	191.423	215.103	280.871	291.568	292.925	315.983	25.3833	49.2562	92.6559	130.57	163.368	191.423	215.103	280.871
1			0.55					0	0		#DIV/0!	1	1	2	0			1	0	1					0	0	0	0	Col mop	#DIV/0!	#DIV/0!	#DIV/0!	#DIV/0!	#DIV/0!	#DIV/0!	#DIV/0!	#DIV/0!	#DIV/0!	#DIV/0!	#DIV/0!	#DIV/0!	#DIV/0!	#DIV/0!	#DIV/0!	#DIV/0!	#DIV/0!	#DIV/0!	#DIV/0!	#DIV/0!
1			0.3					0	0		#DIV/0!	1	1	3	0			1	0	2					0	0	0	0	Col mop	#DIV/0!	#DIV/0!	#DIV/0!	#DIV/0!	#DIV/0!	#DIV/0!	#DIV/0!	#DIV/0!	#DIV/0!	#DIV/0!	#DIV/0!	#DIV/0!	#DIV/0!	#DIV/0!	#DIV/0!	#DIV/0!	#DIV/0!	#DIV/0!	#DIV/0!	#DIV/0!
1	1	Col mop	0.9	3.6	6.95	2.5	3.6	2.3625	0	2	2	4	1	3	1			1	0	2					0	0	0	0	Col mop	21.0204	0.0563174	0.450539	3.60431	12.1646	28.8345	56.3174	97.3165	599.668	1236.28	2213.5	#DIV/0!	0.0563174	0.450539	3.60431	12.1646	21.0204	21.0204	21.0204	21.0204
1	1	Col mop	0.33	3.5	3	3.2	3.5	1.55	0	1	1	1	1	2	1			1	0	1					0	0	0	0	Col mop	26.4169	3.77384	7.54768	15.0954	22.643	30.1907	37.7384	45.2861	83.0244	105.667	128.31	181.144	3.77384	7.54768	15.0954	22.643	26.4169	26.4169	26.4169	26.4169
1			0.25					0	0		#DIV/0!	1	1	3	0			1	0	1					0	0	0	0	Col mop	#DIV/0!	#DIV/0!	#DIV/0!	#DIV/0!	#DIV/0!	#DIV/0!	#DIV/0!	#DIV/0!	#DIV/0!	#DIV/0!	#DIV/0!	#DIV/0!	#DIV/0!	#DIV/0!	#DIV/0!	#DIV/0!	#DIV/0!	#DIV/0!	#DIV/0!	#DIV/0!
1	1	Col mop	0.25	5.5	6	5.3	4.5	2.825	1	3	3	1	1	2	1			1	0	1					0	0	0	0	Col mop	37.5702	-13.9664	0	19.8931	31.1281	36.1787	37.5187	37.6217	106.165	290.77	664.616	2648.05	0	0	19.8931	31.1281	36.1787	37.5187	37.5702	37.5702
1			0.35					0	0		#DIV/0!	1	1	3	0			1	0	1					0	0	0	0	Col mop	#DIV/0!	#DIV/0!	#DIV/0!	#DIV/0!	#DIV/0!	#DIV/0!	#DIV/0!	#DIV/0!	#DIV/0!	#DIV/0!	#DIV/0!	#DIV/0!	#DIV/0!	#DIV/0!	#DIV/0!	#DIV/0!	#DIV/0!	#DIV/0!	#DIV/0!	#DIV/0!
1			0.3					0	0		#DIV/0!	1	1	2	0			1	0	1					0	0	0	0	Col mop	#DIV/0!	#DIV/0!	#DIV/0!	#DIV/0!	#DIV/0!	#DIV/0!	#DIV/0!	#DIV/0!	#DIV/0!	#DIV/0!	#DIV/0!	#DIV/0!	#DIV/0!	#DIV/0!	#DIV/0!	#DIV/0!	#DIV/0!	#DIV/0!	#DIV/0!	#DIV/0!
1			0.2					0	0		#DIV/0!	1	1	2	0										0	0	0	0	Col mop	#DIV/0!	#DIV/0!	#DIV/0!	#DIV/0!	#DIV/0!	#DIV/0!	#DIV/0!	#DIV/0!	#DIV/0!	#DIV/0!	#DIV/0!	#DIV/0!	#DIV/0!	#DIV/0!	#DIV/0!	#DIV/0!	#DIV/0!	#DIV/0!	#DIV/0!	#DIV/0!
1			0.32					0	0		#DIV/0!	1	1	2	0			1	0	2					0	0	0	0	Col mop	#DIV/0!	#DIV/0!	#DIV/0!	#DIV/0!	#DIV/0!	#DIV/0!	#DIV/0!	#DIV/0!	#DIV/0!	#DIV/0!	#DIV/0!	#DIV/0!	#DIV/0!	#DIV/0!	#DIV/0!	#DIV/0!	#DIV/0!	#DIV/0!	#DIV/0!	#DIV/0!
1			0.48					0	0		#DIV/0!	1	1	3	0			1	0	2					0	0	0	0	Col mop	#DIV/0!	#DIV/0!	#DIV/0!	#DIV/0!	#DIV/0!	#DIV/0!	#DIV/0!	#DIV/0!	#DIV/0!	#DIV/0!	#DIV/0!	#DIV/0!	#DIV/0!	#DIV/0!	#DIV/0!	#DIV/0!	#DIV/0!	#DIV/0!	#DIV/0!	#DIV/0!
1			0.6					0	0		#DIV/0!	1	1	4	0			1	0	2					0	0	0	0	Col mop	#DIV/0!	#DIV/0!	#DIV/0!	#DIV/0!	#DIV/0!	#DIV/0!	#DIV/0!	#DIV/0!	#DIV/0!	#DIV/0!	#DIV/0!	#DIV/0!	#DIV/0!	#DIV/0!	#DIV/0!	#DIV/0!	#DIV/0!	#DIV/0!	#DIV/0!	#DIV/0!
1		Col mop	1					0	0		#DIV/0!	4	0	7	1										0	0	0	0	Col mop	#DIV/0!	#DIV/0!	#DIV/0!	#DIV/0!	#DIV/0!	#DIV/0!	#DIV/0!	#DIV/0!	#DIV/0!	#DIV/0!	#DIV/0!	#DIV/0!	#DIV/0!	#DIV/0!	#DIV/0!	#DIV/0!	#DIV/0!	#DIV/0!	#DIV/0!	#DIV/0!
1	1	Col mop	1.15	4.5	5.45	5.6	4	2.7625	0.5	1	1	1	1	4	1			1	0	1					0	0	0	0	Col mop	95.8991	0	11.9874	35.9622	59.9369	83.9117	107.886	131.861	251.735	323.659	395.584	563.407	0	11.9874	35.9622	59.9369	83.9117	95.8991	95.8991	95.8991
1			0.65					0	0		#DIV/0!	2	1	4	0			1	0	1					0	0	0	0	Col mop	#DIV/0!	#DIV/0!	#DIV/0!	#DIV/0!	#DIV/0!	#DIV/0!	#DIV/0!	#DIV/0!	#DIV/0!	#DIV/0!	#DIV/0!	#DIV/0!	#DIV/0!	#DIV/0!	#DIV/0!	#DIV/0!	#DIV/0!	#DIV/0!	#DIV/0!	#DIV/0!
1	1	Col mop	0.65	5.3	1.8	2.1	5.3	0.975	0	1	1	1	1	3	1			1	0	2					0	0	0	0	Col mop	15.8283	1.49324	2.98648	5.97295	8.95943	11.9459	14.9324	17.9189	32.8512	41.8107	50.7701	71.6754	1.49324	2.98648	5.97295	8.95943	11.9459	14.9324	15.8283	15.8283
1			0.33					0	0		#DIV/0!	2	1	5	0			1	0	3					0	0	0	0	Col mop	#DIV/0!	#DIV/0!	#DIV/0!	#DIV/0!	#DIV/0!	#DIV/0!	#DIV/0!	#DIV/0!	#DIV/0!	#DIV/0!	#DIV/0!	#DIV/0!	#DIV/0!	#DIV/0!	#DIV/0!	#DIV/0!	#DIV/0!	#DIV/0!	#DIV/0!	#DIV/0!
1		Col mop	0.25					0	0		#DIV/0!	1	1	3	1			1	0	2					0	0	0	0	Col mop	#DIV/0!	#DIV/0!	#DIV/0!	#DIV/0!	#DIV/0!	#DIV/0!	#DIV/0!	#DIV/0!	#DIV/0!	#DIV/0!	#DIV/0!	#DIV/0!	#DIV/0!	#DIV/0!	#DIV/0!	#DIV/0!	#DIV/0!	#DIV/0!	#DIV/0!	#DIV/0!
1			0.3					0	0		#DIV/0!	2	1	4	0			1	0	2					0	0	0	0	Col mop	#DIV/0!	#DIV/0!	#DIV/0!	#DIV/0!	#DIV/0!	#DIV/0!	#DIV/0!	#DIV/0!	#DIV/0!	#DIV/0!	#DIV/0!	#DIV/0!	#DIV/0!	#DIV/0!	#DIV/0!	#DIV/0!	#DIV/0!	#DIV/0!	#DIV/0!	#DIV/0!
1			0.2					0	0		#DIV/0!	2	1	4	0										0	0	0	0	Col mop	#DIV/0!	#DIV/0!	#DIV/0!	#DIV/0!	#DIV/0!	#DIV/0!	#DIV/0!	#DIV/0!	#DIV/0!	#DIV/0!	#DIV/0!	#DIV/0!	#DIV/0!	#DIV/0!	#DIV/0!	#DIV/0!	#DIV/0!	#DIV/0!	#DIV/0!	#DIV/0!
1	1	Col mop	0.7	3.9	3	3.4	3.9	1.6	0	1	1	2	1	5	1			1	0	1					0	0	0	0	Col mop	31.3657	4.02124	8.04248	16.085	24.1274	32.1699	40.2124	48.2549	88.4672	112.595	136.722	193.019	4.02124	8.04248	16.085	24.1274	31.3657	31.3657	31.3657	31.3657
1			0.5					0	0		#DIV/0!	1	1	3	0			1	0	2					0	0	0	0	Col mop	#DIV/0!	#DIV/0!	#DIV/0!	#DIV/0!	#DIV/0!	#DIV/0!	#DIV/0!	#DIV/0!	#DIV/0!	#DIV/0!	#DIV/0!	#DIV/0!	#DIV/0!	#DIV/0!	#DIV/0!	#DIV/0!	#DIV/0!	#DIV/0!	#DIV/0!	#DIV/0!
1			0.2					0	0		#DIV/0!	1	0	2	0										0	0	0	0	Col mop	#DIV/0!	#DIV/0!	#DIV/0!	#DIV/0!	#DIV/0!	#DIV/0!	#DIV/0!	#DIV/0!	#DIV/0!	#DIV/0!	#DIV/0!	#DIV/0!	#DIV/0!	#DIV/0!	#DIV/0!	#DIV/0!	#DIV/0!	#DIV/0!	#DIV/0!	#DIV/0!
1	1	Col mop	0.35	3.8	3.35	2.85	3.8	1.55	0	1	1	1	1	3	1			1	0	2					0	0	0	0	Col mop	28.6812	3.77384	7.54768	15.0954	22.643	30.1907	37.7384	45.2861	83.0244	105.667	128.31	181.144	3.77384	7.54768	15.0954	22.643	28.6812	28.6812	28.6812	28.6812
1	1	Col mop	1.2	5	5.9	5.3	4.5	2.8	0.5	1	1	1	1	3	1			1	0	2					0	0	0	0	Col mop	110.835	0	12.315	36.9451	61.5752	86.2053	110.835	135.465	258.616	332.506	406.396	578.807	0	12.315	36.9451	61.5752	86.2053	110.835	110.835	110.835
1	1	Col mop	0.65	4.3	4.9	4.2	4.3	2.275	0	1	1	1	1	4	1			1	0	2					0	0	0	0	Col mop	69.9167	8.12985	16.2597	32.5194	48.7791	65.0388	81.2985	97.5582	178.857	227.636	276.415	390.233	8.12985	16.2597	32.5194	48.7791	65.0388	69.9167	69.9167	69.9167
1			0.43					0	0		#DIV/0!	1	1	3	0			1	0	2					0	0	0	0	Col mop	#DIV/0!	#DIV/0!	#DIV/0!	#DIV/0!	#DIV/0!	#DIV/0!	#DIV/0!	#DIV/0!	#DIV/0!	#DIV/0!	#DIV/0!	#DIV/0!	#DIV/0!	#DIV/0!	#DIV/0!	#DIV/0!	#DIV/0!	#DIV/0!	#DIV/0!	#DIV/0!
1			0.23					0	0		#DIV/0!	1	1	3	0			1	0	1					0	0	0	0	Col mop	#DIV/0!	#DIV/0!	#DIV/0!	#DIV/0!	#DIV/0!	#DIV/0!	#DIV/0!	#DIV/0!	#DIV/0!	#DIV/0!	#DIV/0!	#DIV/0!	#DIV/0!	#DIV/0!	#DIV/0!	#DIV/0!	#DIV/0!	#DIV/0!	#DIV/0!	#DIV/0!
1			0.23					0	0		#DIV/0!	2	1	2	0			1	0	2					0	0	0	0	Col mop	#DIV/0!	#DIV/0!	#DIV/0!	#DIV/0!	#DIV/0!	#DIV/0!	#DIV/0!	#DIV/0!	#DIV/0!	#DIV/0!	#DIV/0!	#DIV/0!	#DIV/0!	#DIV/0!	#DIV/0!	#DIV/0!	#DIV/0!	#DIV/0!	#DIV/0!	#DIV/0!
1			0.2					0	0		#DIV/0!	1	0	2	0			1	0	1					0	0	0	0	Col mop	#DIV/0!	#DIV/0!	#DIV/0!	#DIV/0!	#DIV/0!	#DIV/0!	#DIV/0!	#DIV/0!	#DIV/0!	#DIV/0!	#DIV/0!	#DIV/0!	#DIV/0!	#DIV/0!	#DIV/0!	#DIV/0!	#DIV/0!	#DIV/0!	#DIV/0!	#DIV/0!
1			0.15					0	0		#DIV/0!	1	0	2	0										0	0	0	0	Col mop	#DIV/0!	#DIV/0!	#DIV/0!	#DIV/0!	#DIV/0!	#DIV/0!	#DIV/0!	#DIV/0!	#DIV/0!	#DIV/0!	#DIV/0!	#DIV/0!	#DIV/0!	#DIV/0!	#DIV/0!	#DIV/0!	#DIV/0!	#DIV/0!	#DIV/0!	#DIV/0!
1			0.18					0	0		#DIV/0!	1	0	2	0										0	0	0	0	Col mop	#DIV/0!	#DIV/0!	#DIV/0!	#DIV/0!	#DIV/0!	#DIV/0!	#DIV/0!	#DIV/0!	#DIV/0!	#DIV/0!	#DIV/0!	#DIV/0!	#DIV/0!	#DIV/0!	#DIV/0!	#DIV/0!	#DIV/0!	#DIV/0!	#DIV/0!	#DIV/0!
1	1	Col mop	0.65	4.8	7	6	4.8	3.25	0	3	3	1	1	3	1			1	0	1					0	0	0	0	Col mop	53.0398	14.9083	26.7233	42.5117	50.2428	52.7943	53.0437	53.8686	167.342	426.498	923.919	3447.59	14.9083	26.7233	42.5117	50.2428	52.7943	53.0398	53.0398	53.0398
1			0.45					0	0		#DIV/0!	1	1	3	0			1	0	2					0	0	0	0	Col mop	#DIV/0!	#DIV/0!	#DIV/0!	#DIV/0!	#DIV/0!	#DIV/0!	#DIV/0!	#DIV/0!	#DIV/0!	#DIV/0!	#DIV/0!	#DIV/0!	#DIV/0!	#DIV/0!	#DIV/0!	#DIV/0!	#DIV/0!	#DIV/0!	#DIV/0!	#DIV/0!
1			0.28					0	0		#DIV/0!	1	1	2	0			1	0	1					0	0	0	0	Col mop	#DIV/0!	#DIV/0!	#DIV/0!	#DIV/0!	#DIV/0!	#DIV/0!	#DIV/0!	#DIV/0!	#DIV/0!	#DIV/0!	#DIV/0!	#DIV/0!	#DIV/0!	#DIV/0!	#DIV/0!	#DIV/0!	#DIV/0!	#DIV/0!	#DIV/0!	#DIV/0!
1			0.34					0	0		#DIV/0!	1	1	3	0			1	0	1					0	0	0	0	Col mop	#DIV/0!	#DIV/0!	#DIV/0!	#DIV/0!	#DIV/0!	#DIV/0!	#DIV/0!	#DIV/0!	#DIV/0!	#DIV/0!	#DIV/0!	#DIV/0!	#DIV/0!	#DIV/0!	#DIV/0!	#DIV/0!	#DIV/0!	#DIV/0!	#DIV/0!	#DIV/0!
1			0.2					0	0		#DIV/0!	2	1	4	0										0	0	0	0	Col mop	#DIV/0!	#DIV/0!	#DIV/0!	#DIV/0!	#DIV/0!	#DIV/0!	#DIV/0!	#DIV/0!	#DIV/0!	#DIV/0!	#DIV/0!	#DIV/0!	#DIV/0!	#DIV/0!	#DIV/0!	#DIV/0!	#DIV/0!	#DIV/0!	#DIV/0!	#DIV/0!
1	1	Col mop	0.35	3.4	3.3	3.8	3.4	1.775	0	1	1	1	0	2	1			1	0	1					0	0	0	0	Col mop	33.6531	4.94899	9.89798	19.796	29.6939	39.5919	49.4899	59.3879	108.878	138.572	168.266	237.552	4.94899	9.89798	19.796	29.6939	33.6531	33.6531	33.6531	33.6531
1			0.25					0	0		#DIV/0!	1	0	3	0			1	0	2					0	0	0	0	Col mop	#DIV/0!	#DIV/0!	#DIV/0!	#DIV/0!	#DIV/0!	#DIV/0!	#DIV/0!	#DIV/0!	#DIV/0!	#DIV/0!	#DIV/0!	#DIV/0!	#DIV/0!	#DIV/0!	#DIV/0!	#DIV/0!	#DIV/0!	#DIV/0!	#DIV/0!	#DIV/0!
1			0.25					0	0		#DIV/0!	2	1	4	0			1	0	1					0	0	0	0	Col mop	#DIV/0!	#DIV/0!	#DIV/0!	#DIV/0!	#DIV/0!	#DIV/0!	#DIV/0!	#DIV/0!	#DIV/0!	#DIV/0!	#DIV/0!	#DIV/0!	#DIV/0!	#DIV/0!	#DIV/0!	#DIV/0!	#DIV/0!	#DIV/0!	#DIV/0!	#DIV/0!
1	1	Col mop	0.55	4.8	4.3	2.7	4.8	1.75	0	3	3	1	1	3	1			1	0	1					0	0	0	0	Col mop	15.3784	4.32254	7.74816	12.3259	14.5674	15.3072	15.3795	15.6187	48.5192	123.659	267.882	999.597	4.32254	7.74816	12.3259	14.5674	15.3072	15.3784	15.3784	15.3784
1			0.48					0	0		#DIV/0!	1	0	1	0			1	0	1					0	0	0	0	Col mop	#DIV/0!	#DIV/0!	#DIV/0!	#DIV/0!	#DIV/0!	#DIV/0!	#DIV/0!	#DIV/0!	#DIV/0!	#DIV/0!	#DIV/0!	#DIV/0!	#DIV/0!	#DIV/0!	#DIV/0!	#DIV/0!	#DIV/0!	#DIV/0!	#DIV/0!	#DIV/0!
1	1	Col mop	0.64	4.1	4.2	3.7	4.1	1.975	0	1	1	1	1	3	1			1	0	1					0	0	0	0	Col mop	50.2421	6.12709	12.2542	24.5083	36.7625	49.0167	61.2709	73.525	134.796	171.558	208.321	294.1	6.12709	12.2542	24.5083	36.7625	49.0167	50.2421	50.2421	50.2421
1			0.2					0	0		#DIV/0!	1	0	3	0										0	0	0	0	Col mop	#DIV/0!	#DIV/0!	#DIV/0!	#DIV/0!	#DIV/0!	#DIV/0!	#DIV/0!	#DIV/0!	#DIV/0!	#DIV/0!	#DIV/0!	#DIV/0!	#DIV/0!	#DIV/0!	#DIV/0!	#DIV/0!	#DIV/0!	#DIV/0!	#DIV/0!	#DIV/0!
1	1	Col mop	1.46	5.5	4.8	4.4	4.5	2.3	1	1	1	1	1	4	1			1	0	2					0	0	0	0	Col mop	74.7856	-8.30951	0	16.619	33.2381	49.8571	66.4761	83.0951	166.19	216.047	265.904	382.238	0	0	16.619	33.2381	49.8571	66.4761	74.7856	74.7856
1	1	Col mop	0.57	4.2	3.6	3.3	3.7	1.725	0.5	1	1	1	1	2	1			1	0	2					0	0	0	0	Col mop	34.5883	0	4.6741	14.0223	23.3705	32.7187	42.0669	51.4151	98.1561	126.201	154.245	219.683	0	4.6741	14.0223	23.3705	32.7187	34.5883	34.5883	34.5883
1			0.25					0	0		#DIV/0!	2	1	4	0			1	0	2					0	0	0	0	Col mop	#DIV/0!	#DIV/0!	#DIV/0!	#DIV/0!	#DIV/0!	#DIV/0!	#DIV/0!	#DIV/0!	#DIV/0!	#DIV/0!	#DIV/0!	#DIV/0!	#DIV/0!	#DIV/0!	#DIV/0!	#DIV/0!	#DIV/0!	#DIV/0!	#DIV/0!	#DIV/0!
1		Col mop	0.31					0	0		#DIV/0!	2	1	4	1			1	0	1					0	0	0	0	Col mop	#DIV/0!	#DIV/0!	#DIV/0!	#DIV/0!	#DIV/0!	#DIV/0!	#DIV/0!	#DIV/0!	#DIV/0!	#DIV/0!	#DIV/0!	#DIV/0!	#DIV/0!	#DIV/0!	#DIV/0!	#DIV/0!	#DIV/0!	#DIV/0!	#DIV/0!	#DIV/0!
2	1	Col mopA	1.5	14.3	9.4	9.4	14.3	4.7	0	3	3	1	1	2	1			1	0	1					0	38	0	0	Col mopA	330.465	33.4663	64.5933	120.168	167.403	206.976	239.565	265.848	326.404	330.462	332.69	433.607	33.4663	64.5933	120.168	167.403	206.976	239.565	265.848	326.404
2			1					0	0		#DIV/0!	1	1	4	0			1	0	1					0	38	0	0	Col mopA	#DIV/0!	#DIV/0!	#DIV/0!	#DIV/0!	#DIV/0!	#DIV/0!	#DIV/0!	#DIV/0!	#DIV/0!	#DIV/0!	#DIV/0!	#DIV/0!	#DIV/0!	#DIV/0!	#DIV/0!	#DIV/0!	#DIV/0!	#DIV/0!	#DIV/0!	#DIV/0!
2	1	Col mopA	2	18	9.15	8.86	17	4.5025	1	7	7	1	0	1	1	2									38	0	0	0	Col mopA	986.919	-31.844	0	63.688	127.376	191.064	254.752	318.44	636.88	827.779	973.834	252.239	0	0	63.688	127.376	191.064	254.752	318.44	636.88
2	1	Col mopA	1.6	17.3	13.4	13.3	13.3	6.675	4	3	3				1	1		1	0	1					0	5.5	0	0	Col mopA	619.938	-629.519	-521.247	-323.835	-150.613	8.27993e-14	129.585	239.724	554.049	610.468	619.931	699.191	0	0	0	0	0	129.585	239.724	554.049
2			1.4					0	0		#DIV/0!	1	0	2	0	1		1	0	1					0	18	0	0	Col mopA	#DIV/0!	#DIV/0!	#DIV/0!	#DIV/0!	#DIV/0!	#DIV/0!	#DIV/0!	#DIV/0!	#DIV/0!	#DIV/0!	#DIV/0!	#DIV/0!	#DIV/0!	#DIV/0!	#DIV/0!	#DIV/0!	#DIV/0!	#DIV/0!	#DIV/0!	#DIV/0!
2	1	Col mopA	1.6	16.5	10.2	9.4	16.5	4.9	0	3	3	1	0	1	1	1									0	38	0	0	Col mopA	414.448	36.5469	70.8795	133.179	187.451	234.251	274.131	307.644	399.098	413.007	414.46	453.371	36.5469	70.8795	133.179	187.451	234.251	274.131	307.644	399.098
2			1.65					0	0		#DIV/0!	2	1	5	0			1	0	1					38	0	0	0	Col mopA	#DIV/0!	#DIV/0!	#DIV/0!	#DIV/0!	#DIV/0!	#DIV/0!	#DIV/0!	#DIV/0!	#DIV/0!	#DIV/0!	#DIV/0!	#DIV/0!	#DIV/0!	#DIV/0!	#DIV/0!	#DIV/0!	#DIV/0!	#DIV/0!	#DIV/0!	#DIV/0!
2			0.9					0	0		#DIV/0!	2	1	5	0			1	0	2					0	0	0	0	Col mopA	#DIV/0!	#DIV/0!	#DIV/0!	#DIV/0!	#DIV/0!	#DIV/0!	#DIV/0!	#DIV/0!	#DIV/0!	#DIV/0!	#DIV/0!	#DIV/0!	#DIV/0!	#DIV/0!	#DIV/0!	#DIV/0!	#DIV/0!	#DIV/0!	#DIV/0!	#DIV/0!
2	1	Col mopA	1.9	17.2	9.58	9.7	15.2	4.82	2	3	3	1	1	3	1	1		1	0	1					0	18	0	0	Col mopA	369.43	-120.519	-77.8159	0	68.222	127.481	178.409	221.636	344.358	365.983	369.429	402.507	0	0	0	68.222	127.481	178.409	221.636	344.358
2	1	Col mopA	1.9	15	10.4	10.6	12	5.25	3	3	3	1	1	1	1	1		1	0	1					18	0	0	0	Col mopA	346.014	-264.442	-203.444	-93.9124	0	79.4952	145.775	200.039	333.199	345.814	347.616	491.989	0	0	0	0	79.4952	145.775	200.039	333.199
2	1	Col mopA	1.65	16.9	9.6	10.2	16.4	4.95	0.5	3	3	1	0	1	1	2									38	0	0	0	Col mopA	420.386	0	37.2896	105.121	164.433	215.795	259.782	296.963	400.812	418.062	420.386	454.497	0	37.2896	105.121	164.433	215.795	259.782	296.963	400.812
2			0.75					0	0		#DIV/0!	1	1	3	0			1	0	1					0	0	0	0	Col mopA	#DIV/0!	#DIV/0!	#DIV/0!	#DIV/0!	#DIV/0!	#DIV/0!	#DIV/0!	#DIV/0!	#DIV/0!	#DIV/0!	#DIV/0!	#DIV/0!	#DIV/0!	#DIV/0!	#DIV/0!	#DIV/0!	#DIV/0!	#DIV/0!	#DIV/0!	#DIV/0!
															0
															0
															0
															0
															0
															0
															0
															0
															0
															0
															0
															0
															0
															0
															0
															0
															0
															0
															0
															0
															0
															0
															0
															0
															0
															0
															0
															0
															0
															0
															0
															0
															0
															0
															0
															0
															0
															0
															0
															0
															0
															0
															0
															0
															0
															0
															0
															0
															0
															0
															0
															0
															0
															0
															0
															0
															0
															0
															0
															0
															0
															0
															0
															0
															0
															0
															0
															0
															0
															0
															0
															0
															0
															0
															0
															0
															0
															0
															0
															0
															0
															0
															0
															0
															0
															0
															0
															0
															0
															0
															0
															0
															0
															0
															0
															0
															0
															0
															0
															0
															0
															0
															0
															0
															0
															0
															0
															0
															0
															0
															0
															0
															0
															0
															0
															0
															0
															0
															0
															0
															0
															0
															0
															0
															0
															0
															0
															0
															0
															0
															0
															0
															0
															0
															0
															0
															0
															0
															0
															0
															0
															0
															0
															0
															0
															0
															0
															0
															0
															0
															0
															0
															0
															0
															0
															0
															0
															0
															0
															0
															0
															0
															0
															0
															0
															0
															0
															0
															0
															0
															0
															0
															0
															0
															0
															0
															0
															0
															0
															0
															0
															0
															0
															0
															0
															0
															0
															0
															0
															0
															0
															0
															0
															0
															0
															0
															0
															0
															0
															0
															0
															0
															0
															0
															0
															0
															0
															0
															0
															0
															0
															0
															0
															0
															0
															0
															0
															0
															0
															0
															0
															0
															0
															0
															0
															0
															0
															0
															0
															0
															0
															0
															0
															0
															0
															0
															0
															0
															0
															0
															0
															0
															0
															0
															0
[truncated: 68 more columns]

## Sheet: Site6
Date:	23/8/2014														Tree density ≤ 10m (no/ha)	176
Trans. No.:	GNP9														Tree density > 10m (no/ha)	8
			Transect 1									Transect 2 for Tall Trees (GPS coordinates)			Tree height (m)	4.54783
			Width (m)	Length (m)	Area (ha)							Initial	Extension	Total area (ha)	Lower level of canopy (m)	#REF!
	Transect Dimensions:		25	50	0.125							1017.54	6680.84	0.769838
	Co-ordinates:			X	Y								X	Y
			NW Corner									NW Corner
			SW Corner									SW Corner
			NE Corner									NE Corner
			SE Corner									SE Corner
			Max
			2.28	21.3								OED				OUD	DRT	NED				NUD	NFD	OFD	OBE	OBU	NBE	NBU	RE	Canopy volume (m3) up to specified height class	Height classes (m)
Trans. No.	Tree	Sp. Code	Stem Circum.(cm)	Height (m)	D1 (m)	D2 (m)	CD (m)	R	Y	Shape	Adj. Shape	F	C	S	Tree			F	C	S	E									Total	0.5	1	2	3	4	5	6	11	14	17	24	0.5	1	2	3	4	5	6	11
1		Col mop	0.5					0	0		#DIV/0!	1	1	3	1			1	0	1					0	0	0	0	Col mop	#DIV/0!	#DIV/0!	#DIV/0!	#DIV/0!	#DIV/0!	#DIV/0!	#DIV/0!	#DIV/0!	#DIV/0!	#DIV/0!	#DIV/0!	#DIV/0!	#DIV/0!	#DIV/0!	#DIV/0!	#DIV/0!	#DIV/0!	#DIV/0!	#DIV/0!	#DIV/0!
1	1	Col mop	0.78	4.2	3.6	4.4	4.2	2	0	3	3	1	1	2	1			1	0	1					0	0	0	0	Col mop	17.5753	5.5593	9.80203	15.0494	17.1654	17.5734	17.6968	18.9588	92.1656	240.847	515.067	1858.99	5.5593	9.80203	15.0494	17.1654	17.5734	17.5753	17.5753	17.5753
1			0.2					0	0		#DIV/0!	1	0	2	0										0	0	0	0	Col mop	#DIV/0!	#DIV/0!	#DIV/0!	#DIV/0!	#DIV/0!	#DIV/0!	#DIV/0!	#DIV/0!	#DIV/0!	#DIV/0!	#DIV/0!	#DIV/0!	#DIV/0!	#DIV/0!	#DIV/0!	#DIV/0!	#DIV/0!	#DIV/0!	#DIV/0!	#DIV/0!
1			0.12					0	0		#DIV/0!	2	0	2	0										0	0	0	0	Col mop	#DIV/0!	#DIV/0!	#DIV/0!	#DIV/0!	#DIV/0!	#DIV/0!	#DIV/0!	#DIV/0!	#DIV/0!	#DIV/0!	#DIV/0!	#DIV/0!	#DIV/0!	#DIV/0!	#DIV/0!	#DIV/0!	#DIV/0!	#DIV/0!	#DIV/0!	#DIV/0!
1	1	Col mop	1.15	3.1	2.1	2.5	2.6	1.15	0.5	3	3	2	1	5	1			1	0	2					0	0	0	0	Col mop	3.59719	0	1.70179	3.32478	3.59698	3.74639	5.00098	8.58876	104.505	268.644	553.249	1872.05	0	1.70179	3.32478	3.59698	3.59719	3.59719	3.59719	3.59719
1			1.6	3.6	3.3	2.3	3.6	1.4	0	1	1	2	1	5	0			1	0	2					0	0	0	0	Col mop	22.1671	3.07876	6.15752	12.315	18.4726	24.6301	30.7876	36.9451	67.7327	86.2053	104.678	147.781	3.07876	6.15752	12.315	18.4726	22.1671	22.1671	22.1671	22.1671
1	1	Col mop	0.4	5.5	3.8	4.5	5	2.075	0.5	1	1	1	0	1	1			1	0	1					0	0	0	0	Col mop	67.6326	0	6.76326	20.2898	33.8163	47.3428	60.8693	74.3959	142.028	182.608	223.188	317.873	0	6.76326	20.2898	33.8163	47.3428	60.8693	67.6326	67.6326
1			0.35					0	0		#DIV/0!	1	0	1	0			1	0	1					0	0	0	0	Col mop	#DIV/0!	#DIV/0!	#DIV/0!	#DIV/0!	#DIV/0!	#DIV/0!	#DIV/0!	#DIV/0!	#DIV/0!	#DIV/0!	#DIV/0!	#DIV/0!	#DIV/0!	#DIV/0!	#DIV/0!	#DIV/0!	#DIV/0!	#DIV/0!	#DIV/0!	#DIV/0!
1			0.3					0	0		#DIV/0!	1	1	2	0			1	0	2					0	0	0	0	Col mop	#DIV/0!	#DIV/0!	#DIV/0!	#DIV/0!	#DIV/0!	#DIV/0!	#DIV/0!	#DIV/0!	#DIV/0!	#DIV/0!	#DIV/0!	#DIV/0!	#DIV/0!	#DIV/0!	#DIV/0!	#DIV/0!	#DIV/0!	#DIV/0!	#DIV/0!	#DIV/0!
1			0.22					0	0		#DIV/0!	1	0	1	0			1	0	1					0	0	0	0	Col mop	#DIV/0!	#DIV/0!	#DIV/0!	#DIV/0!	#DIV/0!	#DIV/0!	#DIV/0!	#DIV/0!	#DIV/0!	#DIV/0!	#DIV/0!	#DIV/0!	#DIV/0!	#DIV/0!	#DIV/0!	#DIV/0!	#DIV/0!	#DIV/0!	#DIV/0!	#DIV/0!
1			0.1					0	0		#DIV/0!	1	0	1	0										0	0	0	0	Col mop	#DIV/0!	#DIV/0!	#DIV/0!	#DIV/0!	#DIV/0!	#DIV/0!	#DIV/0!	#DIV/0!	#DIV/0!	#DIV/0!	#DIV/0!	#DIV/0!	#DIV/0!	#DIV/0!	#DIV/0!	#DIV/0!	#DIV/0!	#DIV/0!	#DIV/0!	#DIV/0!
1	1	Col mop	1.3	5	6.6	5	5	2.9	0	2	2	2	1	4	1			1	0	2					0	0	0	0	Col mop	43.9906	0.0439906	0.351925	2.8154	9.50197	22.5232	43.9906	76.0158	468.412	965.682	1729.01	#DIV/0!	0.0439906	0.351925	2.8154	9.50197	22.5232	43.9906	43.9906	43.9906
1	1	Col mop	0.45	3.3	3	2.9	2.8	1.475	0.5	1	1	2	1	5	1			1	0	2					0	0	0	0	Col mop	19.1378	0	3.41746	10.2524	17.0873	23.9222	30.7572	37.5921	71.7667	92.2715	112.776	160.621	0	3.41746	10.2524	17.0873	19.1378	19.1378	19.1378	19.1378
1			0.34					0	0		#DIV/0!	2	1	4	0			1	0	2					0	0	0	0	Col mop	#DIV/0!	#DIV/0!	#DIV/0!	#DIV/0!	#DIV/0!	#DIV/0!	#DIV/0!	#DIV/0!	#DIV/0!	#DIV/0!	#DIV/0!	#DIV/0!	#DIV/0!	#DIV/0!	#DIV/0!	#DIV/0!	#DIV/0!	#DIV/0!	#DIV/0!	#DIV/0!
1			0.26					0	0		#DIV/0!	1	1	3	0			1	0	2					0	0	0	0	Col mop	#DIV/0!	#DIV/0!	#DIV/0!	#DIV/0!	#DIV/0!	#DIV/0!	#DIV/0!	#DIV/0!	#DIV/0!	#DIV/0!	#DIV/0!	#DIV/0!	#DIV/0!	#DIV/0!	#DIV/0!	#DIV/0!	#DIV/0!	#DIV/0!	#DIV/0!	#DIV/0!
1	1	Col mop	0.3	4.1	2.5	2.5	4.1	1.25	0	3	3	1	0	1	1			1	0	1					0	0	0	0	Col mop	6.7019	2.16506	3.80501	5.80136	6.57247	6.7018	6.77279	7.36887	38.6462	101.054	215.447	773.014	2.16506	3.80501	5.80136	6.57247	6.7018	6.7019	6.7019	6.7019
1			0.2					0	0		#DIV/0!	1	0	1	0										0	0	0	0	Col mop	#DIV/0!	#DIV/0!	#DIV/0!	#DIV/0!	#DIV/0!	#DIV/0!	#DIV/0!	#DIV/0!	#DIV/0!	#DIV/0!	#DIV/0!	#DIV/0!	#DIV/0!	#DIV/0!	#DIV/0!	#DIV/0!	#DIV/0!	#DIV/0!	#DIV/0!	#DIV/0!
1			0.1					0	0		#DIV/0!	1	0	2	0										0	0	0	0	Col mop	#DIV/0!	#DIV/0!	#DIV/0!	#DIV/0!	#DIV/0!	#DIV/0!	#DIV/0!	#DIV/0!	#DIV/0!	#DIV/0!	#DIV/0!	#DIV/0!	#DIV/0!	#DIV/0!	#DIV/0!	#DIV/0!	#DIV/0!	#DIV/0!	#DIV/0!	#DIV/0!
1		Col mop	0.45					0	0		#DIV/0!				1			2	0	4					0	0	0	0	Col mop	#DIV/0!	#DIV/0!	#DIV/0!	#DIV/0!	#DIV/0!	#DIV/0!	#DIV/0!	#DIV/0!	#DIV/0!	#DIV/0!	#DIV/0!	#DIV/0!	#DIV/0!	#DIV/0!	#DIV/0!	#DIV/0!	#DIV/0!	#DIV/0!	#DIV/0!	#DIV/0!
1	1	Col mop	0.35	3.4	3	3.48	3.4	1.62	0	1	1	1	1	3	1										0	0	0	0	Col mop	28.0323	4.1224	8.2448	16.4896	24.7344	32.9792	41.224	49.4688	90.6928	115.427	140.162	197.875	4.1224	8.2448	16.4896	24.7344	28.0323	28.0323	28.0323	28.0323
1			0.24					0	0		#DIV/0!	1	1	3	0			1	0	1					0	0	0	0	Col mop	#DIV/0!	#DIV/0!	#DIV/0!	#DIV/0!	#DIV/0!	#DIV/0!	#DIV/0!	#DIV/0!	#DIV/0!	#DIV/0!	#DIV/0!	#DIV/0!	#DIV/0!	#DIV/0!	#DIV/0!	#DIV/0!	#DIV/0!	#DIV/0!	#DIV/0!	#DIV/0!
1			0.2					0	0		#DIV/0!	1	1	3	0										0	0	0	0	Col mop	#DIV/0!	#DIV/0!	#DIV/0!	#DIV/0!	#DIV/0!	#DIV/0!	#DIV/0!	#DIV/0!	#DIV/0!	#DIV/0!	#DIV/0!	#DIV/0!	#DIV/0!	#DIV/0!	#DIV/0!	#DIV/0!	#DIV/0!	#DIV/0!	#DIV/0!	#DIV/0!
1			0.15					0	0		#DIV/0!	1	1	3	0										0	0	0	0	Col mop	#DIV/0!	#DIV/0!	#DIV/0!	#DIV/0!	#DIV/0!	#DIV/0!	#DIV/0!	#DIV/0!	#DIV/0!	#DIV/0!	#DIV/0!	#DIV/0!	#DIV/0!	#DIV/0!	#DIV/0!	#DIV/0!	#DIV/0!	#DIV/0!	#DIV/0!	#DIV/0!
1			0.4					0	0		#DIV/0!	1	1	3	0			1	0	1					0	0	0	0	Col mop	#DIV/0!	#DIV/0!	#DIV/0!	#DIV/0!	#DIV/0!	#DIV/0!	#DIV/0!	#DIV/0!	#DIV/0!	#DIV/0!	#DIV/0!	#DIV/0!	#DIV/0!	#DIV/0!	#DIV/0!	#DIV/0!	#DIV/0!	#DIV/0!	#DIV/0!	#DIV/0!
1			0.2					0	0		#DIV/0!	1	1	3	0			1	0	1					0	0	0	0	Col mop	#DIV/0!	#DIV/0!	#DIV/0!	#DIV/0!	#DIV/0!	#DIV/0!	#DIV/0!	#DIV/0!	#DIV/0!	#DIV/0!	#DIV/0!	#DIV/0!	#DIV/0!	#DIV/0!	#DIV/0!	#DIV/0!	#DIV/0!	#DIV/0!	#DIV/0!	#DIV/0!
1	1	Col mop	2.2	4.2	3.3	3.2	3.2	1.625	1	1	1	2	1	5	1			1	0	2					0	0	0	0	Col mop	26.5465	-4.14788	0	8.29577	16.5915	24.8873	33.1831	41.4788	82.9577	107.845	132.732	190.803	0	0	8.29577	16.5915	24.8873	26.5465	26.5465	26.5465
1	1	Col mop	0.48	4.1	3.9	2.9	4.1	1.7	0	3	3	2	1	5	1			1	0	2					0	0	0	0	Col mop	12.3958	4.00449	7.03775	10.7302	12.1564	12.3957	12.527	13.6295	71.4801	186.91	398.49	1429.77	4.00449	7.03775	10.7302	12.1564	12.3957	12.3958	12.3958	12.3958
1			0.18					0	0		#DIV/0!	1	0	1	0			1	0	1					0	0	0	0	Col mop	#DIV/0!	#DIV/0!	#DIV/0!	#DIV/0!	#DIV/0!	#DIV/0!	#DIV/0!	#DIV/0!	#DIV/0!	#DIV/0!	#DIV/0!	#DIV/0!	#DIV/0!	#DIV/0!	#DIV/0!	#DIV/0!	#DIV/0!	#DIV/0!	#DIV/0!	#DIV/0!
1	1	Col mop	0.5	4	3.05	3.45	4	1.625	0	3	3	1	1	3	1			1	0	1					0	0	0	0	Col mop	11.05	3.64735	6.38826	9.66872	10.8773	11.05	11.2226	12.4312	70.2709	183.706	390.374	1392.3	3.64735	6.38826	9.66872	10.8773	11.05	11.05	11.05	11.05
1			0.3					0	0		#DIV/0!	1	1	2	0										0	0	0	0	Col mop	#DIV/0!	#DIV/0!	#DIV/0!	#DIV/0!	#DIV/0!	#DIV/0!	#DIV/0!	#DIV/0!	#DIV/0!	#DIV/0!	#DIV/0!	#DIV/0!	#DIV/0!	#DIV/0!	#DIV/0!	#DIV/0!	#DIV/0!	#DIV/0!	#DIV/0!	#DIV/0!
1			0.25					0	0		#DIV/0!	1	0	1	0			1	0	1					0	0	0	0	Col mop	#DIV/0!	#DIV/0!	#DIV/0!	#DIV/0!	#DIV/0!	#DIV/0!	#DIV/0!	#DIV/0!	#DIV/0!	#DIV/0!	#DIV/0!	#DIV/0!	#DIV/0!	#DIV/0!	#DIV/0!	#DIV/0!	#DIV/0!	#DIV/0!	#DIV/0!	#DIV/0!
1			0.25					0	0		#DIV/0!	1	1	3	0										0	0	0	0	Col mop	#DIV/0!	#DIV/0!	#DIV/0!	#DIV/0!	#DIV/0!	#DIV/0!	#DIV/0!	#DIV/0!	#DIV/0!	#DIV/0!	#DIV/0!	#DIV/0!	#DIV/0!	#DIV/0!	#DIV/0!	#DIV/0!	#DIV/0!	#DIV/0!	#DIV/0!	#DIV/0!
1			0.18					0	0		#DIV/0!	1	0	1	0										0	0	0	0	Col mop	#DIV/0!	#DIV/0!	#DIV/0!	#DIV/0!	#DIV/0!	#DIV/0!	#DIV/0!	#DIV/0!	#DIV/0!	#DIV/0!	#DIV/0!	#DIV/0!	#DIV/0!	#DIV/0!	#DIV/0!	#DIV/0!	#DIV/0!	#DIV/0!	#DIV/0!	#DIV/0!
1	1	Col mop	0.52	3.7	4	2.4	3.7	1.6	0	1	1	1	1	2	1			1	0	1					0	0	0	0	Col mop	29.7572	4.02124	8.04248	16.085	24.1274	32.1699	40.2124	48.2549	88.4672	112.595	136.722	193.019	4.02124	8.04248	16.085	24.1274	29.7572	29.7572	29.7572	29.7572
1			0.25					0	0		#DIV/0!	1	0	2	0			1	0	1					0	0	0	0	Col mop	#DIV/0!	#DIV/0!	#DIV/0!	#DIV/0!	#DIV/0!	#DIV/0!	#DIV/0!	#DIV/0!	#DIV/0!	#DIV/0!	#DIV/0!	#DIV/0!	#DIV/0!	#DIV/0!	#DIV/0!	#DIV/0!	#DIV/0!	#DIV/0!	#DIV/0!	#DIV/0!
1			0.18					0	0		#DIV/0!	1	1	2	0										0	0	0	0	Col mop	#DIV/0!	#DIV/0!	#DIV/0!	#DIV/0!	#DIV/0!	#DIV/0!	#DIV/0!	#DIV/0!	#DIV/0!	#DIV/0!	#DIV/0!	#DIV/0!	#DIV/0!	#DIV/0!	#DIV/0!	#DIV/0!	#DIV/0!	#DIV/0!	#DIV/0!	#DIV/0!
1			0.18					0	0		#DIV/0!	1	0	3	0										0	0	0	0	Col mop	#DIV/0!	#DIV/0!	#DIV/0!	#DIV/0!	#DIV/0!	#DIV/0!	#DIV/0!	#DIV/0!	#DIV/0!	#DIV/0!	#DIV/0!	#DIV/0!	#DIV/0!	#DIV/0!	#DIV/0!	#DIV/0!	#DIV/0!	#DIV/0!	#DIV/0!	#DIV/0!
1			0.25					0	0		#DIV/0!	1	1	2	0			1	0	1					0	0	0	0	Col mop	#DIV/0!	#DIV/0!	#DIV/0!	#DIV/0!	#DIV/0!	#DIV/0!	#DIV/0!	#DIV/0!	#DIV/0!	#DIV/0!	#DIV/0!	#DIV/0!	#DIV/0!	#DIV/0!	#DIV/0!	#DIV/0!	#DIV/0!	#DIV/0!	#DIV/0!	#DIV/0!
1			0.13					0	0		#DIV/0!	1	1	3	0			1	0	1					0	0	0	0	Col mop	#DIV/0!	#DIV/0!	#DIV/0!	#DIV/0!	#DIV/0!	#DIV/0!	#DIV/0!	#DIV/0!	#DIV/0!	#DIV/0!	#DIV/0!	#DIV/0!	#DIV/0!	#DIV/0!	#DIV/0!	#DIV/0!	#DIV/0!	#DIV/0!	#DIV/0!	#DIV/0!
1			0.17					0	0		#DIV/0!	1	1	2	0			1	0	1					0	0	0	0	Col mop	#DIV/0!	#DIV/0!	#DIV/0!	#DIV/0!	#DIV/0!	#DIV/0!	#DIV/0!	#DIV/0!	#DIV/0!	#DIV/0!	#DIV/0!	#DIV/0!	#DIV/0!	#DIV/0!	#DIV/0!	#DIV/0!	#DIV/0!	#DIV/0!	#DIV/0!	#DIV/0!
1	1	Col mop	0.35	3.8	2	2.1	3.8	1.025	0	1	1	1	1	2	1			1	0	2					0	0	0	0	Col mop	12.5424	1.65032	3.30064	6.60127	9.90191	13.2025	16.5032	19.8038	36.307	46.2089	56.1108	79.2153	1.65032	3.30064	6.60127	9.90191	12.5424	12.5424	12.5424	12.5424
1			0.3					0	0		#DIV/0!	1	1	3	0			1	0	1					0	0	0	0	Col mop	#DIV/0!	#DIV/0!	#DIV/0!	#DIV/0!	#DIV/0!	#DIV/0!	#DIV/0!	#DIV/0!	#DIV/0!	#DIV/0!	#DIV/0!	#DIV/0!	#DIV/0!	#DIV/0!	#DIV/0!	#DIV/0!	#DIV/0!	#DIV/0!	#DIV/0!	#DIV/0!
1			0.16					0	0		#DIV/0!	1	0	2	0										0	0	0	0	Col mop	#DIV/0!	#DIV/0!	#DIV/0!	#DIV/0!	#DIV/0!	#DIV/0!	#DIV/0!	#DIV/0!	#DIV/0!	#DIV/0!	#DIV/0!	#DIV/0!	#DIV/0!	#DIV/0!	#DIV/0!	#DIV/0!	#DIV/0!	#DIV/0!	#DIV/0!	#DIV/0!
1	1	Col mop	0.38	3.5	2.9	2.4	3.5	1.325	0	1	1	1	1	2	1			1	0	1					0	0	0	0	Col mop	19.3041	2.75773	5.51546	11.0309	16.5464	22.0618	27.5773	33.0928	60.67	77.2164	93.7628	132.371	2.75773	5.51546	11.0309	16.5464	19.3041	19.3041	19.3041	19.3041
1			0.3					0	0		#DIV/0!	1	1	2	0										0	0	0	0	Col mop	#DIV/0!	#DIV/0!	#DIV/0!	#DIV/0!	#DIV/0!	#DIV/0!	#DIV/0!	#DIV/0!	#DIV/0!	#DIV/0!	#DIV/0!	#DIV/0!	#DIV/0!	#DIV/0!	#DIV/0!	#DIV/0!	#DIV/0!	#DIV/0!	#DIV/0!	#DIV/0!
1			0.12					0	0		#DIV/0!	1	0	2	0										0	0	0	0	Col mop	#DIV/0!	#DIV/0!	#DIV/0!	#DIV/0!	#DIV/0!	#DIV/0!	#DIV/0!	#DIV/0!	#DIV/0!	#DIV/0!	#DIV/0!	#DIV/0!	#DIV/0!	#DIV/0!	#DIV/0!	#DIV/0!	#DIV/0!	#DIV/0!	#DIV/0!	#DIV/0!
1			0.14					0	0		#DIV/0!	1	1	2	0										0	0	0	0	Col mop	#DIV/0!	#DIV/0!	#DIV/0!	#DIV/0!	#DIV/0!	#DIV/0!	#DIV/0!	#DIV/0!	#DIV/0!	#DIV/0!	#DIV/0!	#DIV/0!	#DIV/0!	#DIV/0!	#DIV/0!	#DIV/0!	#DIV/0!	#DIV/0!	#DIV/0!	#DIV/0!
1			0.13					0	0		#DIV/0!	2	0	4	0										0	0	0	0	Col mop	#DIV/0!	#DIV/0!	#DIV/0!	#DIV/0!	#DIV/0!	#DIV/0!	#DIV/0!	#DIV/0!	#DIV/0!	#DIV/0!	#DIV/0!	#DIV/0!	#DIV/0!	#DIV/0!	#DIV/0!	#DIV/0!	#DIV/0!	#DIV/0!	#DIV/0!	#DIV/0!
1	1	Col mop	0.45	4.6	4.8	2.9	3.6	1.925	1	1	1	1	1	2	1										0	0	0	0	Col mop	41.9096	-5.82078	5.16989e-15	11.6416	23.2831	34.9247	46.5663	58.2078	116.416	151.34	186.265	267.756	0	0	11.6416	23.2831	34.9247	41.9096	41.9096	41.9096
1			0.25					0	0		#DIV/0!	1	1	2	0										0	0	0	0	Col mop	#DIV/0!	#DIV/0!	#DIV/0!	#DIV/0!	#DIV/0!	#DIV/0!	#DIV/0!	#DIV/0!	#DIV/0!	#DIV/0!	#DIV/0!	#DIV/0!	#DIV/0!	#DIV/0!	#DIV/0!	#DIV/0!	#DIV/0!	#DIV/0!	#DIV/0!	#DIV/0!
1			0.22					0	0		#DIV/0!	1	0	2	0										0	0	0	0	Col mop	#DIV/0!	#DIV/0!	#DIV/0!	#DIV/0!	#DIV/0!	#DIV/0!	#DIV/0!	#DIV/0!	#DIV/0!	#DIV/0!	#DIV/0!	#DIV/0!	#DIV/0!	#DIV/0!	#DIV/0!	#DIV/0!	#DIV/0!	#DIV/0!	#DIV/0!	#DIV/0!
1			0.22					0	0		#DIV/0!	1	0	3	0										0	0	0	0	Col mop	#DIV/0!	#DIV/0!	#DIV/0!	#DIV/0!	#DIV/0!	#DIV/0!	#DIV/0!	#DIV/0!	#DIV/0!	#DIV/0!	#DIV/0!	#DIV/0!	#DIV/0!	#DIV/0!	#DIV/0!	#DIV/0!	#DIV/0!	#DIV/0!	#DIV/0!	#DIV/0!
1		Col mop	0.35					0	0		#DIV/0!	1	1	3	1			1	0	2					0	0	0	0	Col mop	#DIV/0!	#DIV/0!	#DIV/0!	#DIV/0!	#DIV/0!	#DIV/0!	#DIV/0!	#DIV/0!	#DIV/0!	#DIV/0!	#DIV/0!	#DIV/0!	#DIV/0!	#DIV/0!	#DIV/0!	#DIV/0!	#DIV/0!	#DIV/0!	#DIV/0!	#DIV/0!
1	1	Col mop	0.26	3.7	3.15	2.6	3.7	1.4375	0	3	3	1	1	2	1			1	0	2					0	0	0	0	Col mop	7.99856	2.8242	4.89044	7.22275	7.94439	8.00282	8.34548	9.91983	69.4278	180.55	379.501	1328.97	2.8242	4.89044	7.22275	7.94439	7.99856	7.99856	7.99856	7.99856
1			0.26					0	0		#DIV/0!	1	1	2	0			1	0	1					0	0	0	0	Col mop	#DIV/0!	#DIV/0!	#DIV/0!	#DIV/0!	#DIV/0!	#DIV/0!	#DIV/0!	#DIV/0!	#DIV/0!	#DIV/0!	#DIV/0!	#DIV/0!	#DIV/0!	#DIV/0!	#DIV/0!	#DIV/0!	#DIV/0!	#DIV/0!	#DIV/0!	#DIV/0!
1			0.2					0	0		#DIV/0!	1	1	1	0			1	0	1					0	0	0	0	Col mop	#DIV/0!	#DIV/0!	#DIV/0!	#DIV/0!	#DIV/0!	#DIV/0!	#DIV/0!	#DIV/0!	#DIV/0!	#DIV/0!	#DIV/0!	#DIV/0!	#DIV/0!	#DIV/0!	#DIV/0!	#DIV/0!	#DIV/0!	#DIV/0!	#DIV/0!	#DIV/0!
1			0.22					0	0		#DIV/0!	1	1	2	0			1	0	1					0	0	0	0	Col mop	#DIV/0!	#DIV/0!	#DIV/0!	#DIV/0!	#DIV/0!	#DIV/0!	#DIV/0!	#DIV/0!	#DIV/0!	#DIV/0!	#DIV/0!	#DIV/0!	#DIV/0!	#DIV/0!	#DIV/0!	#DIV/0!	#DIV/0!	#DIV/0!	#DIV/0!	#DIV/0!
1		Col mop	1.6					0	0		#DIV/0!				1	7									0	0	0	0	Col mop	#DIV/0!	#DIV/0!	#DIV/0!	#DIV/0!	#DIV/0!	#DIV/0!	#DIV/0!	#DIV/0!	#DIV/0!	#DIV/0!	#DIV/0!	#DIV/0!	#DIV/0!	#DIV/0!	#DIV/0!	#DIV/0!	#DIV/0!	#DIV/0!	#DIV/0!	#DIV/0!
1		Col mop	0.38					0	0		#DIV/0!	1	1	3	1			1	0	2					0	0	0	0	Col mop	#DIV/0!	#DIV/0!	#DIV/0!	#DIV/0!	#DIV/0!	#DIV/0!	#DIV/0!	#DIV/0!	#DIV/0!	#DIV/0!	#DIV/0!	#DIV/0!	#DIV/0!	#DIV/0!	#DIV/0!	#DIV/0!	#DIV/0!	#DIV/0!	#DIV/0!	#DIV/0!
1			0.28					0	0		#DIV/0!	2	1	4	0			1	0	2					0	0	0	0	Col mop	#DIV/0!	#DIV/0!	#DIV/0!	#DIV/0!	#DIV/0!	#DIV/0!	#DIV/0!	#DIV/0!	#DIV/0!	#DIV/0!	#DIV/0!	#DIV/0!	#DIV/0!	#DIV/0!	#DIV/0!	#DIV/0!	#DIV/0!	#DIV/0!	#DIV/0!	#DIV/0!
1			0.2					0	0		#DIV/0!	2	0	5	0										0	0	0	0	Col mop	#DIV/0!	#DIV/0!	#DIV/0!	#DIV/0!	#DIV/0!	#DIV/0!	#DIV/0!	#DIV/0!	#DIV/0!	#DIV/0!	#DIV/0!	#DIV/0!	#DIV/0!	#DIV/0!	#DIV/0!	#DIV/0!	#DIV/0!	#DIV/0!	#DIV/0!	#DIV/0!
1			0.18					0	0		#DIV/0!	1	0	4	0										0	0	0	0	Col mop	#DIV/0!	#DIV/0!	#DIV/0!	#DIV/0!	#DIV/0!	#DIV/0!	#DIV/0!	#DIV/0!	#DIV/0!	#DIV/0!	#DIV/0!	#DIV/0!	#DIV/0!	#DIV/0!	#DIV/0!	#DIV/0!	#DIV/0!	#DIV/0!	#DIV/0!	#DIV/0!
1			0.11					0	0		#DIV/0!	2	0	7	0										0	0	0	0	Col mop	#DIV/0!	#DIV/0!	#DIV/0!	#DIV/0!	#DIV/0!	#DIV/0!	#DIV/0!	#DIV/0!	#DIV/0!	#DIV/0!	#DIV/0!	#DIV/0!	#DIV/0!	#DIV/0!	#DIV/0!	#DIV/0!	#DIV/0!	#DIV/0!	#DIV/0!	#DIV/0!
1	1	Col mop	0.53	4	3.35	3.75	4	1.775	0	3	3	1	1	2	1			1	0	2					0	0	0	0	Col mop	13.1841	4.35179	7.62206	11.5361	12.9781	13.1841	13.3901	14.8321	83.8427	219.186	465.77	1661.2	4.35179	7.62206	11.5361	12.9781	13.1841	13.1841	13.1841	13.1841
1	1	Col mop	0.39	4.4	2.4	2.65	3.9	1.2625	0.5	3	3	1	1	2	1										0	0	0	0	Col mop	6.50312	-1.48101e-15	2.19424	4.9876	6.20229	6.4961	6.5268	6.95216	38.0212	103.496	225.803	831.963	0	2.19424	4.9876	6.20229	6.4961	6.50312	6.50312	6.50312
1	1	Col mop	0.34	3.8	5.05	3.9	3.8	2.2375	0	1	1	1	1	2	1			1	0	1					0	0	0	0	Col mop	59.7667	7.86404	15.7281	31.4562	47.1843	62.9124	78.6404	94.3685	173.009	220.193	267.378	377.474	7.86404	15.7281	31.4562	47.1843	59.7667	59.7667	59.7667	59.7667
1			0.36					0	0		#DIV/0!	1	1	2	0			1	0	1					0	0	0	0	Col mop	#DIV/0!	#DIV/0!	#DIV/0!	#DIV/0!	#DIV/0!	#DIV/0!	#DIV/0!	#DIV/0!	#DIV/0!	#DIV/0!	#DIV/0!	#DIV/0!	#DIV/0!	#DIV/0!	#DIV/0!	#DIV/0!	#DIV/0!	#DIV/0!	#DIV/0!	#DIV/0!
1			0.45					0	0		#DIV/0!	1	1	2	0			1	0	1					0	0	0	0	Col mop	#DIV/0!	#DIV/0!	#DIV/0!	#DIV/0!	#DIV/0!	#DIV/0!	#DIV/0!	#DIV/0!	#DIV/0!	#DIV/0!	#DIV/0!	#DIV/0!	#DIV/0!	#DIV/0!	#DIV/0!	#DIV/0!	#DIV/0!	#DIV/0!	#DIV/0!	#DIV/0!
1			0.41					0	0		#DIV/0!	2	1	3	0			1	0	2					0	0	0	0	Col mop	#DIV/0!	#DIV/0!	#DIV/0!	#DIV/0!	#DIV/0!	#DIV/0!	#DIV/0!	#DIV/0!	#DIV/0!	#DIV/0!	#DIV/0!	#DIV/0!	#DIV/0!	#DIV/0!	#DIV/0!	#DIV/0!	#DIV/0!	#DIV/0!	#DIV/0!	#DIV/0!
1			0.12					0	0		#DIV/0!	1	0	1	0										0	0	0	0	Col mop	#DIV/0!	#DIV/0!	#DIV/0!	#DIV/0!	#DIV/0!	#DIV/0!	#DIV/0!	#DIV/0!	#DIV/0!	#DIV/0!	#DIV/0!	#DIV/0!	#DIV/0!	#DIV/0!	#DIV/0!	#DIV/0!	#DIV/0!	#DIV/0!	#DIV/0!	#DIV/0!
1	1	Col mop	0.64	4.2	2.9	2.8	4.2	1.425	0	1	1	2	1	5	1			1	0	2					0	0	0	0	Col mop	26.7935	3.1897	6.3794	12.7588	19.1382	25.5176	31.897	38.2764	70.1734	89.3116	108.45	153.106	3.1897	6.3794	12.7588	19.1382	25.5176	26.7935	26.7935	26.7935
1			0.48					0	0		#DIV/0!	2	1	5	0			1	0	2					0	0	0	0	Col mop	#DIV/0!	#DIV/0!	#DIV/0!	#DIV/0!	#DIV/0!	#DIV/0!	#DIV/0!	#DIV/0!	#DIV/0!	#DIV/0!	#DIV/0!	#DIV/0!	#DIV/0!	#DIV/0!	#DIV/0!	#DIV/0!	#DIV/0!	#DIV/0!	#DIV/0!	#DIV/0!
1			0.17					0	0		#DIV/0!	1	1	3	0										0	0	0	0	Col mop	#DIV/0!	#DIV/0!	#DIV/0!	#DIV/0!	#DIV/0!	#DIV/0!	#DIV/0!	#DIV/0!	#DIV/0!	#DIV/0!	#DIV/0!	#DIV/0!	#DIV/0!	#DIV/0!	#DIV/0!	#DIV/0!	#DIV/0!	#DIV/0!	#DIV/0!	#DIV/0!
1	1	Col mop	0.55	3.8	2.9	2.95	3.8	1.4625	0	3	3	2	1	5	1			1	0	2					0	0	0	0	Col mop	8.50295	2.93416	5.10127	7.59922	8.42361	8.50419	8.77072	10.153	66.3413	172.947	364.905	1285.74	2.93416	5.10127	7.59922	8.42361	8.50295	8.50295	8.50295	8.50295
1			0.24					0	0		#DIV/0!	2	1	5	0			1	0	2					0	0	0	0	Col mop	#DIV/0!	#DIV/0!	#DIV/0!	#DIV/0!	#DIV/0!	#DIV/0!	#DIV/0!	#DIV/0!	#DIV/0!	#DIV/0!	#DIV/0!	#DIV/0!	#DIV/0!	#DIV/0!	#DIV/0!	#DIV/0!	#DIV/0!	#DIV/0!	#DIV/0!	#DIV/0!
1			0.23					0	0		#DIV/0!	2	1	5	0			1	0	2					0	0	0	0	Col mop	#DIV/0!	#DIV/0!	#DIV/0!	#DIV/0!	#DIV/0!	#DIV/0!	#DIV/0!	#DIV/0!	#DIV/0!	#DIV/0!	#DIV/0!	#DIV/0!	#DIV/0!	#DIV/0!	#DIV/0!	#DIV/0!	#DIV/0!	#DIV/0!	#DIV/0!	#DIV/0!
1			0.28					0	0		#DIV/0!	1	1	3	0			1	0	2					0	0	0	0	Col mop	#DIV/0!	#DIV/0!	#DIV/0!	#DIV/0!	#DIV/0!	#DIV/0!	#DIV/0!	#DIV/0!	#DIV/0!	#DIV/0!	#DIV/0!	#DIV/0!	#DIV/0!	#DIV/0!	#DIV/0!	#DIV/0!	#DIV/0!	#DIV/0!	#DIV/0!	#DIV/0!
1	1	Col mop	0.25	3.6	1.72	1.75	3.6	0.8675	0	3	3	1	1	2	1			1	0	1					0	0	0	0	Col mop	2.83423	1.02451	1.76654	2.58541	2.82111	2.83812	3.00092	3.67401	27.4506	71.1669	148.999	518.56	1.02451	1.76654	2.58541	2.82111	2.83423	2.83423	2.83423	2.83423
1	1	Col mop	0.48	3.8	3.1	3.1	3.8	1.55	0	3	3	2	1	5	1			1	0	2					0	0	0	0	Col mop	9.55083	3.29576	5.72994	8.53573	9.46171	9.55222	9.8516	11.4042	74.5171	194.261	409.875	1444.2	3.29576	5.72994	8.53573	9.46171	9.55083	9.55083	9.55083	9.55083
1			0.39					0	0		#DIV/0!	1	1	3	0			1	0	1					0	0	0	0	Col mop	#DIV/0!	#DIV/0!	#DIV/0!	#DIV/0!	#DIV/0!	#DIV/0!	#DIV/0!	#DIV/0!	#DIV/0!	#DIV/0!	#DIV/0!	#DIV/0!	#DIV/0!	#DIV/0!	#DIV/0!	#DIV/0!	#DIV/0!	#DIV/0!	#DIV/0!	#DIV/0!
1			0.32					0	0		#DIV/0!	1	1	4	0			1	0	1					0	0	0	0	Col mop	#DIV/0!	#DIV/0!	#DIV/0!	#DIV/0!	#DIV/0!	#DIV/0!	#DIV/0!	#DIV/0!	#DIV/0!	#DIV/0!	#DIV/0!	#DIV/0!	#DIV/0!	#DIV/0!	#DIV/0!	#DIV/0!	#DIV/0!	#DIV/0!	#DIV/0!	#DIV/0!
1			0.2					0	0		#DIV/0!	1	1	3	0			1	0	1					0	0	0	0	Col mop	#DIV/0!	#DIV/0!	#DIV/0!	#DIV/0!	#DIV/0!	#DIV/0!	#DIV/0!	#DIV/0!	#DIV/0!	#DIV/0!	#DIV/0!	#DIV/0!	#DIV/0!	#DIV/0!	#DIV/0!	#DIV/0!	#DIV/0!	#DIV/0!	#DIV/0!	#DIV/0!
1			0.19					0	0		#DIV/0!	1	1	2	0			1	0	1					0	0	0	0	Col mop	#DIV/0!	#DIV/0!	#DIV/0!	#DIV/0!	#DIV/0!	#DIV/0!	#DIV/0!	#DIV/0!	#DIV/0!	#DIV/0!	#DIV/0!	#DIV/0!	#DIV/0!	#DIV/0!	#DIV/0!	#DIV/0!	#DIV/0!	#DIV/0!	#DIV/0!	#DIV/0!
1	1	Col mop	2.13	16.8	10.1	9.95	10.8	5.0125	6	3	3	1	0	2	1	3		1	0	1					63	0	0	0	Col mop	283.875	-692.054	-604.972	-446.659	-308.358	-188.716	-86.3807	0	239.906	278.928	283.876	367.986	0	0	0	0	0	0	0	239.906
2	1	Col mopA	2.14	18.9	9.5	9.67	13.9	4.7925	5	3	3	1	1	1	1	2									0	38	0	0	Col mopA	333.99	-440.726	-379.27	-266.283	-165.907	-77.3944	8.53647e-14	67.0226	272.674	319.359	333.137	350.487	0	0	0	0	0	0	67.0226	272.674
2	1	Col mopA	2.28	21.3	11	11.2	19.3	5.55	2	3	3	1	0	1	1	2									63	0	0	0	Col mopA	621.924	-156.57	-101.768	0	91.7497	174.001	247.272	312.082	527.392	588.27	615.046	623.627	0	0	0	91.7497	174.001	247.272	312.082	527.392
2	1	Col mopA	2.2	15.4	7.16	7.97	10.4	3.7825	5	3	3	1	1	2	1	2		1	0	1					38	0	5.5	0	Col mopA	155.663	-302.104	-257.549	-177.303	-108.183	-49.3587	0	40.7236	143.875	155.283	156.23	243.683	0	0	0	0	0	0	40.7236	143.875
2	1	Col mopA	1.8	18	8.6	8.9	15	4.375	3	3	3	1	0	1	1	1									18	0	0	0	Col mopA	300.36	-176.6	-136.875	-64.1657	0	56.1561	104.837	146.575	269.834	294.664	300.271	319.583	0	0	0	0	56.1561	104.837	146.575	269.834
2			0.65					0	0		#DIV/0!	2	1	4	0			1	0	2					0	0	0	0	Col mopA	#DIV/0!	#DIV/0!	#DIV/0!	#DIV/0!	#DIV/0!	#DIV/0!	#DIV/0!	#DIV/0!	#DIV/0!	#DIV/0!	#DIV/0!	#DIV/0!	#DIV/0!	#DIV/0!	#DIV/0!	#DIV/0!	#DIV/0!	#DIV/0!	#DIV/0!	#DIV/0!
2	1	Col mopA	2.15	18.9	7.75	7.45	16.9	3.8	2	3	3	1	0	1	1	2		1	0	1					63	0	0	0	Col mopA	255.298	-74.191	-48.0537	-5.36688e-14	42.6905	80.3352	113.251	141.756	229.221	249.076	254.936	262.314	0	0	0	42.6905	80.3352	113.251	141.756	229.221
2			0.35					0	0		#DIV/0!	2	1	5	0			1	0	1					0	0	0	0	Col mopA	#DIV/0!	#DIV/0!	#DIV/0!	#DIV/0!	#DIV/0!	#DIV/0!	#DIV/0!	#DIV/0!	#DIV/0!	#DIV/0!	#DIV/0!	#DIV/0!	#DIV/0!	#DIV/0!	#DIV/0!	#DIV/0!	#DIV/0!	#DIV/0!	#DIV/0!	#DIV/0!
2	1	Col mopA	1.45	18.5	8.8	9	18.5	4.45	0	3	3	1	1	1	1	1									18	0	0	0	Col mopA	383.253	30.2423	58.8503	111.345	157.847	198.72	234.327	265.031	357.717	377.737	383.049	393.324	30.2423	58.8503	111.345	157.847	198.72	234.327	265.031	357.717
2			0.92					0	0		#DIV/0!	2	1	5	0			1	0	2					0	0	0	0	Col mopA	#DIV/0!	#DIV/0!	#DIV/0!	#DIV/0!	#DIV/0!	#DIV/0!	#DIV/0!	#DIV/0!	#DIV/0!	#DIV/0!	#DIV/0!	#DIV/0!	#DIV/0!	#DIV/0!	#DIV/0!	#DIV/0!	#DIV/0!	#DIV/0!	#DIV/0!	#DIV/0!
2	1	Col mopA	2.15	17.8	10.05	12.2	17.8	5.5625	0	3	3	1	1	1	1	1		1	0	1					38	0	0	0	Col mopA	576.175	47.2029	91.7547	173.211	244.983	307.683	361.923	408.317	544.051	570.569	576.122	600.523	47.2029	91.7547	173.211	244.983	307.683	361.923	408.317	544.051
2			0.74					0	0		#DIV/0!				0	7									0	0	0	0	Col mopA	#DIV/0!	#DIV/0!	#DIV/0!	#DIV/0!	#DIV/0!	#DIV/0!	#DIV/0!	#DIV/0!	#DIV/0!	#DIV/0!	#DIV/0!	#DIV/0!	#DIV/0!	#DIV/0!	#DIV/0!	#DIV/0!	#DIV/0!	#DIV/0!	#DIV/0!	#DIV/0!
2	1	Col mopA	1.85	20.5	10.1	13.2	19.5	5.825	1	3	3	1	0	1	1	1		1	0	1					38	0	0	0	Col mopA	692.182	-54.6217	0	101.122	191.882	272.84	344.557	407.592	612.146	666.546	688.18	696.185	0	0	101.122	191.882	272.84	344.557	407.592	612.146
2			1.65					0	0		#DIV/0!	1	0	1	0	1		1	0	1					38	0	0	0	Col mopA	#DIV/0!	#DIV/0!	#DIV/0!	#DIV/0!	#DIV/0!	#DIV/0!	#DIV/0!	#DIV/0!	#DIV/0!	#DIV/0!	#DIV/0!	#DIV/0!	#DIV/0!	#DIV/0!	#DIV/0!	#DIV/0!	#DIV/0!	#DIV/0!	#DIV/0!	#DIV/0!
2	1	Col mopA	1.85	15.2	8.15	7.9	9.2	4.0125	6	3	3	1	0	1	1	2									63	0	0	0	Col mopA	154.957	-477.164	-414.831	-302.732	-206.393	-124.62	-56.2209	0	140.214	154.613	156.118	290.569	0	0	0	0	0	0	0	140.214
2	1	Col mopA	1.6	16.5	7.5	5.6	16.5	3.275	0	3	3	1	1	2	1			1	0	1					18	0	63	0	Col mopA	185.14	16.326	31.663	59.493	83.7373	104.643	122.458	137.429	178.283	184.496	185.145	202.527	16.326	31.663	59.493	83.7373	104.643	122.458	137.429	178.283
2			0.37					0	0		#DIV/0!	1	0	1	0			1	0	1					0	0	0	0	Col mopA	#DIV/0!	#DIV/0!	#DIV/0!	#DIV/0!	#DIV/0!	#DIV/0!	#DIV/0!	#DIV/0!	#DIV/0!	#DIV/0!	#DIV/0!	#DIV/0!	#DIV/0!	#DIV/0!	#DIV/0!	#DIV/0!	#DIV/0!	#DIV/0!	#DIV/0!	#DIV/0!
2	1	Col mopA	1.5	18.4	7.02	7.4	12.4	3.605	6	3	3	1	0	1	1	2									63	0	0	0	Col mopA	168.588	-338.543	-297.222	-221.437	-154.353	-95.4394	-44.1651	9.66039e-14	132.757	161.056	168.345	184.116	0	0	0	0	0	0	0	132.757
2	1	Col mopA	1.9	18.1	9.8	11.9	13.1	5.425	5	3	3	1	0	1	1	1									18	0	0	0	Col mopA	403.334	-574.779	-493.763	-345.402	-214.372	-99.5969	-2.18768e-13	85.4951	339.121	390.969	403.095	440.181	0	0	0	0	0	0	85.4951	339.121
2			0.25					0	0		#DIV/0!	1	1	2	0			1	0	1					0	0	0	0	Col mopA	#DIV/0!	#DIV/0!	#DIV/0!	#DIV/0!	#DIV/0!	#DIV/0!	#DIV/0!	#DIV/0!	#DIV/0!	#DIV/0!	#DIV/0!	#DIV/0!	#DIV/0!	#DIV/0!	#DIV/0!	#DIV/0!	#DIV/0!	#DIV/0!	#DIV/0!	#DIV/0!
2			0.3					0	0		#DIV/0!	1	1	4	0										0	0	0	0	Col mopA	#DIV/0!	#DIV/0!	#DIV/0!	#DIV/0!	#DIV/0!	#DIV/0!	#DIV/0!	#DIV/0!	#DIV/0!	#DIV/0!	#DIV/0!	#DIV/0!	#DIV/0!	#DIV/0!	#DIV/0!	#DIV/0!	#DIV/0!	#DIV/0!	#DIV/0!	#DIV/0!
2	1	Col mopA	1.7	15.5	6.45	9.05	15.5	3.875	0	3	3	1	0	1	1	2		1	0	1					18	0	18	0	Col mopA	243.483	22.811	44.1508	82.6132	115.779	144.042	167.793	187.424	237.525	243.263	243.704	283.638	22.811	44.1508	82.6132	115.779	144.042	167.793	187.424	237.525
2			1.65					0	0		#DIV/0!	2	1	5	0			1	0	1					0	0	0	0	Col mopA	#DIV/0!	#DIV/0!	#DIV/0!	#DIV/0!	#DIV/0!	#DIV/0!	#DIV/0!	#DIV/0!	#DIV/0!	#DIV/0!	#DIV/0!	#DIV/0!	#DIV/0!	#DIV/0!	#DIV/0!	#DIV/0!	#DIV/0!	#DIV/0!	#DIV/0!	#DIV/0!
2	1	Col mopA	1.95	16.9	7.2	8.45	16.9	3.9125	0	3	3	1	0	1	1	2		1	0	1					0	0	63	0	Col mopA	270.638	23.3175	45.2557	85.1623	120.056	150.274	176.152	198.026	259.123	269.271	270.639	290.706	23.3175	45.2557	85.1623	120.056	150.274	176.152	198.026	259.123
2			1.05					0	0		#DIV/0!	2	1	4	0			1	0	2					0	0	0	0	Col mopA	#DIV/0!	#DIV/0!	#DIV/0!	#DIV/0!	#DIV/0!	#DIV/0!	#DIV/0!	#DIV/0!	#DIV/0!	#DIV/0!	#DIV/0!	#DIV/0!	#DIV/0!	#DIV/0!	#DIV/0!	#DIV/0!	#DIV/0!	#DIV/0!	#DIV/0!	#DIV/0!
2	1	Col mopA	1.7	14.4	7.6	7.55	8.4	3.7875	6	3	3	1	0	1	1	1		1	0	2					18	0	0	0	Col mopA	126.06	-445.136	-385.686	-279.454	-189.045	-113.183	-50.594	0	117.701	126.047	129.799	314.232	0	0	0	0	0	0	0	117.701
2			0.4					0	0		#DIV/0!	1	1	2	0			1	0	1					0	0	0	0	Col mopA	#DIV/0!	#DIV/0!	#DIV/0!	#DIV/0!	#DIV/0!	#DIV/0!	#DIV/0!	#DIV/0!	#DIV/0!	#DIV/0!	#DIV/0!	#DIV/0!	#DIV/0!	#DIV/0!	#DIV/0!	#DIV/0!	#DIV/0!	#DIV/0!	#DIV/0!	#DIV/0!
[truncated: 68 more columns]

## Sheet: Site7
Date:	21/8/2014														Tree density ≤ 10m (no/ha)	80
Trans. No.:	GNP10														Tree density > 10m (no/ha)	24
			Transect 1									Transect 2 Extension for Tall Trees			Tree height (m)	6.75269
			Width (m)	Length (m)	Area (ha)							Width (m)	Length (m)	Area (ha)	Lower level of canopy (m)	#REF!
	Transect Dimensions:		50	50	0.25							70	50	0.35
	Co-ordinates:			X	Y								X	Y
			NW Corner									NW Corner
			SW Corner									SW Corner
			NE Corner									NE Corner
			SE Corner									SE Corner
			Max
			2.7	20.2								OED				OUD	DRT	NED				NUD	NFD	OFD	OBE	OBU	NBE	NBU	RE	Canopy volume (m3) up to specified height class	Height classes (m)
Trans. No.	Tree	Sp. Code	Stem Circum.(cm)	Height (m)	D1 (m)	D2 (m)	CD (m)	R	Y	Shape	Adj. Shape	F	C	S	Tree			F	C	S	E									Total	0.5	1	2	3	4	5	6	11	14	17	24	0.5	1	2	3	4	5	6	11
1	1	Col mop	2.7	18.8	9.2	8.3	17.8	4.375	1	3	3	1	0	2	1			1	0	1					38	0	0	0	Col mop	356.427	-30.8876	0	56.7603	107.15	151.549	190.335	223.889	326.435	349.437	356.058	365.313	0	0	56.7603	107.15	151.549	190.335	223.889	326.435
1	1	Col mop	0.29	3.6	3.1	3	3.6	1.525	0	1	1	1	1	2	1			1	0	1					0	0	0	0	Col mop	26.3022	3.65308	7.30617	14.6123	21.9185	29.2247	36.5308	43.837	80.3678	102.286	124.205	175.348	3.65308	7.30617	14.6123	21.9185	26.3022	26.3022	26.3022	26.3022
1			0.31					0	0		#DIV/0!	1	1	2	0			1	0	1	c				0	0	0	0	Col mop	#DIV/0!	#DIV/0!	#DIV/0!	#DIV/0!	#DIV/0!	#DIV/0!	#DIV/0!	#DIV/0!	#DIV/0!	#DIV/0!	#DIV/0!	#DIV/0!	#DIV/0!	#DIV/0!	#DIV/0!	#DIV/0!	#DIV/0!	#DIV/0!	#DIV/0!	#DIV/0!
1			0.25					0	0		#DIV/0!	1	1	3	0			1	0	1					0	0	0	0	Col mop	#DIV/0!	#DIV/0!	#DIV/0!	#DIV/0!	#DIV/0!	#DIV/0!	#DIV/0!	#DIV/0!	#DIV/0!	#DIV/0!	#DIV/0!	#DIV/0!	#DIV/0!	#DIV/0!	#DIV/0!	#DIV/0!	#DIV/0!	#DIV/0!	#DIV/0!	#DIV/0!
1			0.26					0	0		#DIV/0!	1	0	2	0			1	0	1					0	0	0	0	Col mop	#DIV/0!	#DIV/0!	#DIV/0!	#DIV/0!	#DIV/0!	#DIV/0!	#DIV/0!	#DIV/0!	#DIV/0!	#DIV/0!	#DIV/0!	#DIV/0!	#DIV/0!	#DIV/0!	#DIV/0!	#DIV/0!	#DIV/0!	#DIV/0!	#DIV/0!	#DIV/0!
1			0.22					0	0		#DIV/0!	1	1	2	0			1	0	1	c				0	0	0	0	Col mop	#DIV/0!	#DIV/0!	#DIV/0!	#DIV/0!	#DIV/0!	#DIV/0!	#DIV/0!	#DIV/0!	#DIV/0!	#DIV/0!	#DIV/0!	#DIV/0!	#DIV/0!	#DIV/0!	#DIV/0!	#DIV/0!	#DIV/0!	#DIV/0!	#DIV/0!	#DIV/0!
1	1	Col mop	1.82	13.6	6.75	8	10.6	3.6875	3	3	3	1	0	1	1	2		1	0	1					0	18	0	0	Col mop	150.787	-133.83	-102.468	-46.8282	0	38.7762	70.26	95.2111	148.562	150.795	155.763	293.199	0	0	0	0	38.7762	70.26	95.2111	148.562
1			0.3					0	0		#DIV/0!	2	1	3	0										0	0	0	0	Col mop	#DIV/0!	#DIV/0!	#DIV/0!	#DIV/0!	#DIV/0!	#DIV/0!	#DIV/0!	#DIV/0!	#DIV/0!	#DIV/0!	#DIV/0!	#DIV/0!	#DIV/0!	#DIV/0!	#DIV/0!	#DIV/0!	#DIV/0!	#DIV/0!	#DIV/0!	#DIV/0!
1		Col mop	0.6					0	0		#DIV/0!	2	1	5	1										0	0	0	0	Col mop	#DIV/0!	#DIV/0!	#DIV/0!	#DIV/0!	#DIV/0!	#DIV/0!	#DIV/0!	#DIV/0!	#DIV/0!	#DIV/0!	#DIV/0!	#DIV/0!	#DIV/0!	#DIV/0!	#DIV/0!	#DIV/0!	#DIV/0!	#DIV/0!	#DIV/0!	#DIV/0!
1		Col mop	0.8					0	0		#DIV/0!	2	1	5	1										0	0	0	0	Col mop	#DIV/0!	#DIV/0!	#DIV/0!	#DIV/0!	#DIV/0!	#DIV/0!	#DIV/0!	#DIV/0!	#DIV/0!	#DIV/0!	#DIV/0!	#DIV/0!	#DIV/0!	#DIV/0!	#DIV/0!	#DIV/0!	#DIV/0!	#DIV/0!	#DIV/0!	#DIV/0!
1	1	Col mop	1.2	4.4	3.2	3.25	3.9	1.6125	0.5	1	1	2	1	5	1			1	0	1	c				0	0	0	0	Col mop	31.8577	-3.6276e-15	4.08432	12.2529	20.4216	28.5902	36.7588	44.9275	85.7706	110.277	134.782	191.963	0	4.08432	12.2529	20.4216	28.5902	31.8577	31.8577	31.8577
1	1	Col mop	0.6	4.5	2.9	2.4	3.5	1.325	1	1	1	1	1	2	1			1	0	1	c				0	0	0	0	Col mop	19.3041	-2.75773	0	5.51546	11.0309	16.5464	22.0618	27.5773	55.1546	71.701	88.2473	126.856	0	0	5.51546	11.0309	16.5464	19.3041	19.3041	19.3041
1			0.28					0	0		#DIV/0!	1	1	2	0			1	0	1	c				0	0	0	0	Col mop	#DIV/0!	#DIV/0!	#DIV/0!	#DIV/0!	#DIV/0!	#DIV/0!	#DIV/0!	#DIV/0!	#DIV/0!	#DIV/0!	#DIV/0!	#DIV/0!	#DIV/0!	#DIV/0!	#DIV/0!	#DIV/0!	#DIV/0!	#DIV/0!	#DIV/0!	#DIV/0!
1		Col mop	0.57					0	0		#DIV/0!	2	1	5	1			1	0	1	c				0	0	0	0	Col mop	#DIV/0!	#DIV/0!	#DIV/0!	#DIV/0!	#DIV/0!	#DIV/0!	#DIV/0!	#DIV/0!	#DIV/0!	#DIV/0!	#DIV/0!	#DIV/0!	#DIV/0!	#DIV/0!	#DIV/0!	#DIV/0!	#DIV/0!	#DIV/0!	#DIV/0!	#DIV/0!
1			0.3					0	0		#DIV/0!	1	1	3	0			1	0	1	c				0	0	0	0	Col mop	#DIV/0!	#DIV/0!	#DIV/0!	#DIV/0!	#DIV/0!	#DIV/0!	#DIV/0!	#DIV/0!	#DIV/0!	#DIV/0!	#DIV/0!	#DIV/0!	#DIV/0!	#DIV/0!	#DIV/0!	#DIV/0!	#DIV/0!	#DIV/0!	#DIV/0!	#DIV/0!
1			0.36					0	0		#DIV/0!	1	1	3	0			1	0	1	c				0	0	0	0	Col mop	#DIV/0!	#DIV/0!	#DIV/0!	#DIV/0!	#DIV/0!	#DIV/0!	#DIV/0!	#DIV/0!	#DIV/0!	#DIV/0!	#DIV/0!	#DIV/0!	#DIV/0!	#DIV/0!	#DIV/0!	#DIV/0!	#DIV/0!	#DIV/0!	#DIV/0!	#DIV/0!
1			0.4					0	0		#DIV/0!	2	0	7	0										0	0	0	0	Col mop	#DIV/0!	#DIV/0!	#DIV/0!	#DIV/0!	#DIV/0!	#DIV/0!	#DIV/0!	#DIV/0!	#DIV/0!	#DIV/0!	#DIV/0!	#DIV/0!	#DIV/0!	#DIV/0!	#DIV/0!	#DIV/0!	#DIV/0!	#DIV/0!	#DIV/0!	#DIV/0!
1	1	Col mop	0.58	4	2.8	2.3	4	1.51667	0	4	4	1	1	2	1			1	0	1	c				0	0	0	0	Col mop	14.599	1.05923	3.71383	10.6707	14.5938	9.20612	-11.7692	-54.609	-816.468	-1937.68	-3764.1	-11720.2	1.05923	3.71383	10.6707	14.5938	14.599	14.599	14.599	14.599
1			0.27					0	0		#DIV/0!	1	0	1	0										0	0	0	0	Col mop	#DIV/0!	#DIV/0!	#DIV/0!	#DIV/0!	#DIV/0!	#DIV/0!	#DIV/0!	#DIV/0!	#DIV/0!	#DIV/0!	#DIV/0!	#DIV/0!	#DIV/0!	#DIV/0!	#DIV/0!	#DIV/0!	#DIV/0!	#DIV/0!	#DIV/0!	#DIV/0!
1	1	Col mop	0.32	3.3	3.1	3.1	3.3	1.55	0	1	1	1	1	3	1			1	0	1					0	0	0	0	Col mop	24.9073	3.77384	7.54768	15.0954	22.643	30.1907	37.7384	45.2861	83.0244	105.667	128.31	181.144	3.77384	7.54768	15.0954	22.643	24.9073	24.9073	24.9073	24.9073
1			0.42					0	0		#DIV/0!	1	1	2	0			1	0	1	c				0	0	0	0	Col mop	#DIV/0!	#DIV/0!	#DIV/0!	#DIV/0!	#DIV/0!	#DIV/0!	#DIV/0!	#DIV/0!	#DIV/0!	#DIV/0!	#DIV/0!	#DIV/0!	#DIV/0!	#DIV/0!	#DIV/0!	#DIV/0!	#DIV/0!	#DIV/0!	#DIV/0!	#DIV/0!
1			0.18					0	0		#DIV/0!	1	0	1	0			1	0	1					0	0	0	0	Col mop	#DIV/0!	#DIV/0!	#DIV/0!	#DIV/0!	#DIV/0!	#DIV/0!	#DIV/0!	#DIV/0!	#DIV/0!	#DIV/0!	#DIV/0!	#DIV/0!	#DIV/0!	#DIV/0!	#DIV/0!	#DIV/0!	#DIV/0!	#DIV/0!	#DIV/0!	#DIV/0!
1	1	Col mop	0.44	4.1	3.6	3.07	4.1	1.6675	0	1	1	2	1	4	1			1	0	1	c				0	0	0	0	Col mop	35.815	4.36769	8.73538	17.4708	26.2061	34.9415	43.6769	52.4123	96.0891	122.295	148.501	209.649	4.36769	8.73538	17.4708	26.2061	34.9415	35.815	35.815	35.815
1			0.38					0	0		#DIV/0!	1	1	3	0			1	0	1	c				0	0	0	0	Col mop	#DIV/0!	#DIV/0!	#DIV/0!	#DIV/0!	#DIV/0!	#DIV/0!	#DIV/0!	#DIV/0!	#DIV/0!	#DIV/0!	#DIV/0!	#DIV/0!	#DIV/0!	#DIV/0!	#DIV/0!	#DIV/0!	#DIV/0!	#DIV/0!	#DIV/0!	#DIV/0!
1			0.27					0	0		#DIV/0!	1	1	2	0			1	0	1	c				0	0	0	0	Col mop	#DIV/0!	#DIV/0!	#DIV/0!	#DIV/0!	#DIV/0!	#DIV/0!	#DIV/0!	#DIV/0!	#DIV/0!	#DIV/0!	#DIV/0!	#DIV/0!	#DIV/0!	#DIV/0!	#DIV/0!	#DIV/0!	#DIV/0!	#DIV/0!	#DIV/0!	#DIV/0!
1			0.23					0	0		#DIV/0!	1	1	3	0										0	0	0	0	Col mop	#DIV/0!	#DIV/0!	#DIV/0!	#DIV/0!	#DIV/0!	#DIV/0!	#DIV/0!	#DIV/0!	#DIV/0!	#DIV/0!	#DIV/0!	#DIV/0!	#DIV/0!	#DIV/0!	#DIV/0!	#DIV/0!	#DIV/0!	#DIV/0!	#DIV/0!	#DIV/0!
1	1	Col mop	1.35	4.5	7.58	4.7	4.5	3.07	0	1	1	2	1	3	1			1	0	1	c				0	0	0	0	Col mop	133.241	14.8046	29.6092	59.2184	88.8276	118.437	148.046	177.655	325.701	414.529	503.356	710.621	14.8046	29.6092	59.2184	88.8276	118.437	133.241	133.241	133.241
1	1	Col mop	0.98	5	3.68	3	4.5	1.67	0.5	1	1	2	1	4	1			1	0	2	c				0	0	0	0	Col mop	39.4271	0	4.38079	13.1424	21.904	30.6656	39.4271	48.1887	91.9967	118.281	144.566	205.897	0	4.38079	13.1424	21.904	30.6656	39.4271	39.4271	39.4271
1	1	Col mop	0.6	2.9	2.35	2.95	2.9	1.325	0	1	1	2	1	5	1			1	0	2	c				0	0	0	0	Col mop	15.9948	2.75773	5.51546	11.0309	16.5464	22.0618	27.5773	33.0928	60.67	77.2164	93.7628	132.371	2.75773	5.51546	11.0309	15.9948	15.9948	15.9948	15.9948	15.9948
1		Col mop	0.72					0	0		#DIV/0!	2	1	6	1										0	0	0	0	Col mop	#DIV/0!	#DIV/0!	#DIV/0!	#DIV/0!	#DIV/0!	#DIV/0!	#DIV/0!	#DIV/0!	#DIV/0!	#DIV/0!	#DIV/0!	#DIV/0!	#DIV/0!	#DIV/0!	#DIV/0!	#DIV/0!	#DIV/0!	#DIV/0!	#DIV/0!	#DIV/0!
1			0.35					0	0		#DIV/0!	1	1	2	0			1	0	1	c				0	0	0	0	Col mop	#DIV/0!	#DIV/0!	#DIV/0!	#DIV/0!	#DIV/0!	#DIV/0!	#DIV/0!	#DIV/0!	#DIV/0!	#DIV/0!	#DIV/0!	#DIV/0!	#DIV/0!	#DIV/0!	#DIV/0!	#DIV/0!	#DIV/0!	#DIV/0!	#DIV/0!	#DIV/0!
1			0.16					0	0		#DIV/0!	1	1	2	0			1	0	1	c				0	0	0	0	Col mop	#DIV/0!	#DIV/0!	#DIV/0!	#DIV/0!	#DIV/0!	#DIV/0!	#DIV/0!	#DIV/0!	#DIV/0!	#DIV/0!	#DIV/0!	#DIV/0!	#DIV/0!	#DIV/0!	#DIV/0!	#DIV/0!	#DIV/0!	#DIV/0!	#DIV/0!	#DIV/0!
1			0.16					0	0		#DIV/0!	1	0	1	0										0	0	0	0	Col mop	#DIV/0!	#DIV/0!	#DIV/0!	#DIV/0!	#DIV/0!	#DIV/0!	#DIV/0!	#DIV/0!	#DIV/0!	#DIV/0!	#DIV/0!	#DIV/0!	#DIV/0!	#DIV/0!	#DIV/0!	#DIV/0!	#DIV/0!	#DIV/0!	#DIV/0!	#DIV/0!
1		Col mop	2					0	0		#DIV/0!				1	7									0	0	0	0	Col mop	#DIV/0!	#DIV/0!	#DIV/0!	#DIV/0!	#DIV/0!	#DIV/0!	#DIV/0!	#DIV/0!	#DIV/0!	#DIV/0!	#DIV/0!	#DIV/0!	#DIV/0!	#DIV/0!	#DIV/0!	#DIV/0!	#DIV/0!	#DIV/0!	#DIV/0!	#DIV/0!
1	1	Col mop	0.32	4.2	4.5	3.95	4.2	2.1125	0	1	1	1	1	2	1			1	0	1	c				0	0	0	0	Col mop	58.8834	7.00992	14.0198	28.0397	42.0595	56.0794	70.0992	84.1191	154.218	196.278	238.337	336.476	7.00992	14.0198	28.0397	42.0595	56.0794	58.8834	58.8834	58.8834
1			0.4					0	0		#DIV/0!	1	1	3	0			1	0	1	c				0	0	0	0	Col mop	#DIV/0!	#DIV/0!	#DIV/0!	#DIV/0!	#DIV/0!	#DIV/0!	#DIV/0!	#DIV/0!	#DIV/0!	#DIV/0!	#DIV/0!	#DIV/0!	#DIV/0!	#DIV/0!	#DIV/0!	#DIV/0!	#DIV/0!	#DIV/0!	#DIV/0!	#DIV/0!
1			0.22					0	0		#DIV/0!	1	1	2	0			1	0	1	c				0	0	0	0	Col mop	#DIV/0!	#DIV/0!	#DIV/0!	#DIV/0!	#DIV/0!	#DIV/0!	#DIV/0!	#DIV/0!	#DIV/0!	#DIV/0!	#DIV/0!	#DIV/0!	#DIV/0!	#DIV/0!	#DIV/0!	#DIV/0!	#DIV/0!	#DIV/0!	#DIV/0!	#DIV/0!
1			0.18					0	0		#DIV/0!	1	1	2	0										0	0	0	0	Col mop	#DIV/0!	#DIV/0!	#DIV/0!	#DIV/0!	#DIV/0!	#DIV/0!	#DIV/0!	#DIV/0!	#DIV/0!	#DIV/0!	#DIV/0!	#DIV/0!	#DIV/0!	#DIV/0!	#DIV/0!	#DIV/0!	#DIV/0!	#DIV/0!	#DIV/0!	#DIV/0!
1			0.25					0	0		#DIV/0!	1	1	4	0										0	0	0	0	Col mop	#DIV/0!	#DIV/0!	#DIV/0!	#DIV/0!	#DIV/0!	#DIV/0!	#DIV/0!	#DIV/0!	#DIV/0!	#DIV/0!	#DIV/0!	#DIV/0!	#DIV/0!	#DIV/0!	#DIV/0!	#DIV/0!	#DIV/0!	#DIV/0!	#DIV/0!	#DIV/0!
1			0.15					0	0		#DIV/0!	1	0	2	0										0	0	0	0	Col mop	#DIV/0!	#DIV/0!	#DIV/0!	#DIV/0!	#DIV/0!	#DIV/0!	#DIV/0!	#DIV/0!	#DIV/0!	#DIV/0!	#DIV/0!	#DIV/0!	#DIV/0!	#DIV/0!	#DIV/0!	#DIV/0!	#DIV/0!	#DIV/0!	#DIV/0!	#DIV/0!
1	1	Col mop	2.5	16.9	6.38	6.35	16.9	3.1825	0	3	3	1	0	1	1	2		1	0	1					63	0	0	0	Col mop	179.068	15.428	29.9434	56.3476	79.4352	99.4287	116.551	131.024	171.449	178.163	179.068	192.346	15.428	29.9434	56.3476	79.4352	99.4287	116.551	131.024	171.449
1	1	Col mop	2.27	13.8	7	10.1	10.8	4.275	3	3	3	1	0	1	1	1		1	0	1					38	0	0	0	Col mop	206.486	-179.147	-137.269	-62.8319	0	52.2102	94.7822	128.7	202.887	206.487	211.857	380.434	0	0	0	0	52.2102	94.7822	128.7	202.887
1			1.27					0	0		#DIV/0!	2	1	5	0			1	0	1	c				0	38	0	0	Col mop	#DIV/0!	#DIV/0!	#DIV/0!	#DIV/0!	#DIV/0!	#DIV/0!	#DIV/0!	#DIV/0!	#DIV/0!	#DIV/0!	#DIV/0!	#DIV/0!	#DIV/0!	#DIV/0!	#DIV/0!	#DIV/0!	#DIV/0!	#DIV/0!	#DIV/0!	#DIV/0!
1			0.8					0	0		#DIV/0!	2	1	2	0			1	0	2	c				0	0	0	0	Col mop	#DIV/0!	#DIV/0!	#DIV/0!	#DIV/0!	#DIV/0!	#DIV/0!	#DIV/0!	#DIV/0!	#DIV/0!	#DIV/0!	#DIV/0!	#DIV/0!	#DIV/0!	#DIV/0!	#DIV/0!	#DIV/0!	#DIV/0!	#DIV/0!	#DIV/0!	#DIV/0!
1			0.9					0	0		#DIV/0!	2	1	5	0			1	0	1	c				0	0	0	0	Col mop	#DIV/0!	#DIV/0!	#DIV/0!	#DIV/0!	#DIV/0!	#DIV/0!	#DIV/0!	#DIV/0!	#DIV/0!	#DIV/0!	#DIV/0!	#DIV/0!	#DIV/0!	#DIV/0!	#DIV/0!	#DIV/0!	#DIV/0!	#DIV/0!	#DIV/0!	#DIV/0!
1		Col mop	0.7					0	0		#DIV/0!				1	7									0	0	0	0	Col mop	#DIV/0!	#DIV/0!	#DIV/0!	#DIV/0!	#DIV/0!	#DIV/0!	#DIV/0!	#DIV/0!	#DIV/0!	#DIV/0!	#DIV/0!	#DIV/0!	#DIV/0!	#DIV/0!	#DIV/0!	#DIV/0!	#DIV/0!	#DIV/0!	#DIV/0!	#DIV/0!
1	1	Col mop	1.99	5	5.24	5.5	5	2.685	0	1	1	2	1	5	1			1	0	2	c				0	0	0	0	Col mop	113.242	11.3242	22.6484	45.2969	67.9453	90.5938	113.242	135.891	249.133	317.078	385.024	543.563	11.3242	22.6484	45.2969	67.9453	90.5938	113.242	113.242	113.242
1	1	Col mop	0.33	3.8	5.2	3.7	3.8	2.225	0	1	1	1	1	2	1			1	0	1	c				0	0	0	0	Col mop	59.1008	7.77642	15.5528	31.1057	46.6585	62.2114	77.7642	93.3171	171.081	217.74	264.398	373.268	7.77642	15.5528	31.1057	46.6585	59.1008	59.1008	59.1008	59.1008
1			0.28					0	0		#DIV/0!	1	1	2	0			1	0	1	c				0	0	0	0	Col mop	#DIV/0!	#DIV/0!	#DIV/0!	#DIV/0!	#DIV/0!	#DIV/0!	#DIV/0!	#DIV/0!	#DIV/0!	#DIV/0!	#DIV/0!	#DIV/0!	#DIV/0!	#DIV/0!	#DIV/0!	#DIV/0!	#DIV/0!	#DIV/0!	#DIV/0!	#DIV/0!
1			0.34					0	0		#DIV/0!	1	0	1	0										0	0	0	0	Col mop	#DIV/0!	#DIV/0!	#DIV/0!	#DIV/0!	#DIV/0!	#DIV/0!	#DIV/0!	#DIV/0!	#DIV/0!	#DIV/0!	#DIV/0!	#DIV/0!	#DIV/0!	#DIV/0!	#DIV/0!	#DIV/0!	#DIV/0!	#DIV/0!	#DIV/0!	#DIV/0!
1			0.29					0	0		#DIV/0!	1	1	2	0										0	0	0	0	Col mop	#DIV/0!	#DIV/0!	#DIV/0!	#DIV/0!	#DIV/0!	#DIV/0!	#DIV/0!	#DIV/0!	#DIV/0!	#DIV/0!	#DIV/0!	#DIV/0!	#DIV/0!	#DIV/0!	#DIV/0!	#DIV/0!	#DIV/0!	#DIV/0!	#DIV/0!	#DIV/0!
1			0.42					0	0		#DIV/0!	2	1	3	0										0	0	0	0	Col mop	#DIV/0!	#DIV/0!	#DIV/0!	#DIV/0!	#DIV/0!	#DIV/0!	#DIV/0!	#DIV/0!	#DIV/0!	#DIV/0!	#DIV/0!	#DIV/0!	#DIV/0!	#DIV/0!	#DIV/0!	#DIV/0!	#DIV/0!	#DIV/0!	#DIV/0!	#DIV/0!
1	1	Col mop	0.97	4.3	4.55	3.33	3.3	1.97	1	1	1	2	1	5	1			1	0	2	c				0	0	0	0	Col mop	40.2343	-6.0961	0	12.1922	24.3844	36.5766	48.7688	60.961	121.922	158.499	195.075	280.421	0	0	12.1922	24.3844	36.5766	40.2343	40.2343	40.2343
1			0.85					0	0		#DIV/0!	2	0	7	0										0	0	0	0	Col mop	#DIV/0!	#DIV/0!	#DIV/0!	#DIV/0!	#DIV/0!	#DIV/0!	#DIV/0!	#DIV/0!	#DIV/0!	#DIV/0!	#DIV/0!	#DIV/0!	#DIV/0!	#DIV/0!	#DIV/0!	#DIV/0!	#DIV/0!	#DIV/0!	#DIV/0!	#DIV/0!
1	1	Col mop	0.35	3.5	3.5	2.7	3.5	1.55	0	1	1	1	1	3	1			1	0	1	c				0	0	0	0	Col mop	26.4169	3.77384	7.54768	15.0954	22.643	30.1907	37.7384	45.2861	83.0244	105.667	128.31	181.144	3.77384	7.54768	15.0954	22.643	26.4169	26.4169	26.4169	26.4169
1			0.32					0	0		#DIV/0!	2	1	5	0										0	0	0	0	Col mop	#DIV/0!	#DIV/0!	#DIV/0!	#DIV/0!	#DIV/0!	#DIV/0!	#DIV/0!	#DIV/0!	#DIV/0!	#DIV/0!	#DIV/0!	#DIV/0!	#DIV/0!	#DIV/0!	#DIV/0!	#DIV/0!	#DIV/0!	#DIV/0!	#DIV/0!	#DIV/0!
1			0.2					0	0		#DIV/0!	1	0	2	0										0	0	0	0	Col mop	#DIV/0!	#DIV/0!	#DIV/0!	#DIV/0!	#DIV/0!	#DIV/0!	#DIV/0!	#DIV/0!	#DIV/0!	#DIV/0!	#DIV/0!	#DIV/0!	#DIV/0!	#DIV/0!	#DIV/0!	#DIV/0!	#DIV/0!	#DIV/0!	#DIV/0!	#DIV/0!
1			0.24					0	0		#DIV/0!	1	0	1	0			1	0	1					0	0	0	0	Col mop	#DIV/0!	#DIV/0!	#DIV/0!	#DIV/0!	#DIV/0!	#DIV/0!	#DIV/0!	#DIV/0!	#DIV/0!	#DIV/0!	#DIV/0!	#DIV/0!	#DIV/0!	#DIV/0!	#DIV/0!	#DIV/0!	#DIV/0!	#DIV/0!	#DIV/0!	#DIV/0!
1			0.2					0	0		#DIV/0!	1	0	1	0										0	0	0	0	Col mop	#DIV/0!	#DIV/0!	#DIV/0!	#DIV/0!	#DIV/0!	#DIV/0!	#DIV/0!	#DIV/0!	#DIV/0!	#DIV/0!	#DIV/0!	#DIV/0!	#DIV/0!	#DIV/0!	#DIV/0!	#DIV/0!	#DIV/0!	#DIV/0!	#DIV/0!	#DIV/0!
1	1	Col mop	0.65	4.5	5.4	4.5	4.5	2.475	0	2	2	2	1	5	1			1	0	2	c				0	0	0	0	Col mop	28.8375	0.0395576	0.31646	2.53168	8.54443	20.2535	39.5576	68.3555	421.209	868.368	1554.77	#DIV/0!	0.0395576	0.31646	2.53168	8.54443	20.2535	28.8375	28.8375	28.8375
1			0.55					0	0		#DIV/0!	2	1	4	0			1	0	2	c				0	0	0	0	Col mop	#DIV/0!	#DIV/0!	#DIV/0!	#DIV/0!	#DIV/0!	#DIV/0!	#DIV/0!	#DIV/0!	#DIV/0!	#DIV/0!	#DIV/0!	#DIV/0!	#DIV/0!	#DIV/0!	#DIV/0!	#DIV/0!	#DIV/0!	#DIV/0!	#DIV/0!	#DIV/0!
1			0.3					0	0		#DIV/0!	1	1	2	0			1	0	1	c				0	0	0	0	Col mop	#DIV/0!	#DIV/0!	#DIV/0!	#DIV/0!	#DIV/0!	#DIV/0!	#DIV/0!	#DIV/0!	#DIV/0!	#DIV/0!	#DIV/0!	#DIV/0!	#DIV/0!	#DIV/0!	#DIV/0!	#DIV/0!	#DIV/0!	#DIV/0!	#DIV/0!	#DIV/0!
1			0.26					0	0		#DIV/0!	2	1	3	0			1	0	1	c				0	0	0	0	Col mop	#DIV/0!	#DIV/0!	#DIV/0!	#DIV/0!	#DIV/0!	#DIV/0!	#DIV/0!	#DIV/0!	#DIV/0!	#DIV/0!	#DIV/0!	#DIV/0!	#DIV/0!	#DIV/0!	#DIV/0!	#DIV/0!	#DIV/0!	#DIV/0!	#DIV/0!	#DIV/0!
1		Col mop	1					0	0		#DIV/0!	4	1	3	1			1	0	2	c				0	0	0	0	Col mop	#DIV/0!	#DIV/0!	#DIV/0!	#DIV/0!	#DIV/0!	#DIV/0!	#DIV/0!	#DIV/0!	#DIV/0!	#DIV/0!	#DIV/0!	#DIV/0!	#DIV/0!	#DIV/0!	#DIV/0!	#DIV/0!	#DIV/0!	#DIV/0!	#DIV/0!	#DIV/0!
1	1	Col mop	0.54	3.8	2.15	2.8	3.8	1.2375	0	1	1	1	1	2	1			1	0	1	c				0	0	0	0	Col mop	18.282	2.40553	4.81105	9.62211	14.4332	19.2442	24.0553	28.8663	52.9216	67.3548	81.7879	115.465	2.40553	4.81105	9.62211	14.4332	18.282	18.282	18.282	18.282
1			0.12					0	0		#DIV/0!	1	0	1	0										0	0	0	0	Col mop	#DIV/0!	#DIV/0!	#DIV/0!	#DIV/0!	#DIV/0!	#DIV/0!	#DIV/0!	#DIV/0!	#DIV/0!	#DIV/0!	#DIV/0!	#DIV/0!	#DIV/0!	#DIV/0!	#DIV/0!	#DIV/0!	#DIV/0!	#DIV/0!	#DIV/0!	#DIV/0!
1	1	Col mop	1.72	16	7.4	5.6	16	3.25	0	3	3	1	1	2	1	1		1	0	1	c				38	0	0	0	Col mop	176.799	16.0624	31.1212	58.3576	81.9683	102.212	119.348	133.635	171.404	176.454	176.843	198.899	16.0624	31.1212	58.3576	81.9683	102.212	119.348	133.635	171.404
1	1	Col mop	0.53	3.57	3.2	3.8	3.07	1.67833	0.5	4	4	1	1	3	1			1	0	2	c				0	0	0	0	Col mop	19.7828	0	1.18607	8.32082	16.5749	19.6715	11.3337	-14.7154	-630.323	-1613.94	-3265.4	-10667.9	0	1.18607	8.32082	16.5749	19.7828	19.7828	19.7828	19.7828
1			0.3					0	0		#DIV/0!				0	7									0	0	0	0	Col mop	#DIV/0!	#DIV/0!	#DIV/0!	#DIV/0!	#DIV/0!	#DIV/0!	#DIV/0!	#DIV/0!	#DIV/0!	#DIV/0!	#DIV/0!	#DIV/0!	#DIV/0!	#DIV/0!	#DIV/0!	#DIV/0!	#DIV/0!	#DIV/0!	#DIV/0!	#DIV/0!
1	1	Col mop	0.42	3.4	3	3.5	3.4	1.625	0	1	1	1	1	3	1			1	0	1	c				0	0	0	0	Col mop	28.2056	4.14788	8.29577	16.5915	24.8873	33.1831	41.4788	49.7746	91.2534	116.141	141.028	199.098	4.14788	8.29577	16.5915	24.8873	28.2056	28.2056	28.2056	28.2056
1			0.2					0	0		#DIV/0!	1	1	3	0										0	0	0	0	Col mop	#DIV/0!	#DIV/0!	#DIV/0!	#DIV/0!	#DIV/0!	#DIV/0!	#DIV/0!	#DIV/0!	#DIV/0!	#DIV/0!	#DIV/0!	#DIV/0!	#DIV/0!	#DIV/0!	#DIV/0!	#DIV/0!	#DIV/0!	#DIV/0!	#DIV/0!	#DIV/0!
1		Col mop	0.8					0	0		#DIV/0!	2	1	5	1			1	0	2	c				0	0	0	0	Col mop	#DIV/0!	#DIV/0!	#DIV/0!	#DIV/0!	#DIV/0!	#DIV/0!	#DIV/0!	#DIV/0!	#DIV/0!	#DIV/0!	#DIV/0!	#DIV/0!	#DIV/0!	#DIV/0!	#DIV/0!	#DIV/0!	#DIV/0!	#DIV/0!	#DIV/0!	#DIV/0!
1			0.48					0	0		#DIV/0!	2	1	4	0			1	0	2	c				0	0	0	0	Col mop	#DIV/0!	#DIV/0!	#DIV/0!	#DIV/0!	#DIV/0!	#DIV/0!	#DIV/0!	#DIV/0!	#DIV/0!	#DIV/0!	#DIV/0!	#DIV/0!	#DIV/0!	#DIV/0!	#DIV/0!	#DIV/0!	#DIV/0!	#DIV/0!	#DIV/0!	#DIV/0!
1	1	Col mop	0.58	5.3	3.7	3.8	5.3	1.875	0	2	2	1	1	2	1			1	0	1	c				0	0	0	0	Col mop	19.4927	0.0163665	0.130932	1.04745	3.53516	8.37963	16.3665	28.2813	174.27	359.277	643.268	#DIV/0!	0.0163665	0.130932	1.04745	3.53516	8.37963	16.3665	19.4927	19.4927
1			0.7					0	0		#DIV/0!	2	1	4	0			1	0	3	c				0	0	0	0	Col mop	#DIV/0!	#DIV/0!	#DIV/0!	#DIV/0!	#DIV/0!	#DIV/0!	#DIV/0!	#DIV/0!	#DIV/0!	#DIV/0!	#DIV/0!	#DIV/0!	#DIV/0!	#DIV/0!	#DIV/0!	#DIV/0!	#DIV/0!	#DIV/0!	#DIV/0!	#DIV/0!
1			0.42					0	0		#DIV/0!	1	1	3	0			1	0	2	c				0	0	0	0	Col mop	#DIV/0!	#DIV/0!	#DIV/0!	#DIV/0!	#DIV/0!	#DIV/0!	#DIV/0!	#DIV/0!	#DIV/0!	#DIV/0!	#DIV/0!	#DIV/0!	#DIV/0!	#DIV/0!	#DIV/0!	#DIV/0!	#DIV/0!	#DIV/0!	#DIV/0!	#DIV/0!
1			0.18					0	0		#DIV/0!	1	0	3	0			1	0	2					0	0	0	0	Col mop	#DIV/0!	#DIV/0!	#DIV/0!	#DIV/0!	#DIV/0!	#DIV/0!	#DIV/0!	#DIV/0!	#DIV/0!	#DIV/0!	#DIV/0!	#DIV/0!	#DIV/0!	#DIV/0!	#DIV/0!	#DIV/0!	#DIV/0!	#DIV/0!	#DIV/0!	#DIV/0!
1			0.26					0	0		#DIV/0!	1	0	2	0			1	0	2					0	0	0	0	Col mop	#DIV/0!	#DIV/0!	#DIV/0!	#DIV/0!	#DIV/0!	#DIV/0!	#DIV/0!	#DIV/0!	#DIV/0!	#DIV/0!	#DIV/0!	#DIV/0!	#DIV/0!	#DIV/0!	#DIV/0!	#DIV/0!	#DIV/0!	#DIV/0!	#DIV/0!	#DIV/0!
1	1	Col mop	1.35	15.3	9.2	11.43	15.3	5.1575	0	3	3	1	0	1	1	1									18	0	18	0	Col mop	425.759	40.3919	78.1447	146.09	204.549	254.235	295.861	330.141	416.308	425.498	426.343	504.039	40.3919	78.1447	146.09	204.549	254.235	295.861	330.141	416.308
1			1.15					0	0		#DIV/0!			4	0			1	0	1					5.5	0	63	0	Col mop	#DIV/0!	#DIV/0!	#DIV/0!	#DIV/0!	#DIV/0!	#DIV/0!	#DIV/0!	#DIV/0!	#DIV/0!	#DIV/0!	#DIV/0!	#DIV/0!	#DIV/0!	#DIV/0!	#DIV/0!	#DIV/0!	#DIV/0!	#DIV/0!	#DIV/0!	#DIV/0!
1	1	Col mop	0.68	3.5	3.1	3.2	3	1.575	0.5	1	1	2	1	5	1			1	0	2	c				0	0	0	0	Col mop	23.3793	0	3.89656	11.6897	19.4828	27.2759	35.069	42.8621	81.8277	105.207	128.586	183.138	0	3.89656	11.6897	19.4828	23.3793	23.3793	23.3793	23.3793
2	1	Col mopA	1.98	20.2	7.05	5.2	20.2	3.0625	0	3	3	1	1	2	1	1		1	0	1	c				38	0	0	0	Col mopA	198.197	14.3563	28.0021	53.2341	75.8402	95.9649	113.752	129.347	179.473	192.466	197.409	199.517	14.3563	28.0021	53.2341	75.8402	95.9649	113.752	129.347	179.473
2	1	Col mopA	1.86	14.3	8.4	8.75	12.3	4.2875	2	3	3	1	1	2	1	2		1	0	1	c				38	0	0	0	Col mopA	236.542	-97.5222	-62.5107	-3.41612e-14	53.1297	97.6411	134.297	163.86	231.973	236.538	239.044	352.555	0	0	0	53.1297	97.6411	134.297	163.86	231.973
2	1	Col mopA	1.55	15.7	7.95	7.38	9.7	3.8325	6	3	3				1	1									63	0	0	0	Col mopA	149.049	-424.467	-369.711	-270.88	-185.474	-112.511	-51.0134	0	132.094	148.247	149.408	242.428	0	0	0	0	0	0	0	132.094
[truncated: 68 more columns]
