# Supplementary material for: Emergent trees in Colophospermum mopane woodland: influence of elephant density on persistence versus attrition
Source: PeerJ. 2024 Feb 26;12:e16961. doi: 10.7717/peerj.16961 (PMC10903334; doi:10.7717/peerj.16961)
Supplement: Data S7 — This dataset is used in conjunction with the shrub and tree data sets for Malilangwe in 2001 and 2014, and Gonarezhou in 2014, for the production of Figure 2 [file peerj-12-16961-s010.xlsx]

## Sheet: Site1
Date:	14/9/00
Site No. :	1V23
			Width (m)	Length (m)	Area (ha)			Length (m)
	Transect Dimensions:		10	50	0.05
	Co-ordinates:			X	Y			X
			NW Corner
			SW Corner
			NE Corner
			SE Corner
									OED		OUD	NED		NUD	NFD	OFD	OBE	OBU	NBE	NBU	RE	Notes	Canopy volume (m3)																				Damage
Trans. No.	Sp. Code	Coppice	Height (m)	D1 (m)	D2 (m)	R	Shape	Adj. shape	Score	Eaten		Score	Eaten										Total	0.5	1	2	3	4	5	0.5	1	2	3	4	5	OED	OUD	NED	NUD	NFD	OFD	Old Rec. Vol.	OED	OUD	NED	NUD	NFD	OFD	Sp. Code
1	Gre bic	T	3.3	3.5	3.3	1.7	7	7															24.8062	4.5396	9.0792	18.0878	24.3543	21.833	4.24725	4.5396	9.0792	18.0878	24.3543	24.8062	24.8062	0	0	0	0	0	0	24.8062	0	0	0	0	0	0	Gre bic
1	Gre bic	T	3.3	4	2	1.5	7	7															19.785	3.53429	7.06858	14.1274	19.3895	17.1194	1.04004	3.53429	7.06858	14.1274	19.3895	19.785	19.785	0	0	0	0	0	0	19.785	0	0	0	0	0	0	Gre bic
1	Gre bic	T	2.9	3.4	3.2	1.65	7	7															20.0901	4.27649	8.55299	16.6582	20.0373	12.4318	-12.4352	4.27649	8.55299	16.6582	20.0901	20.0901	20.0901	0	0	0	0	0	0	20.0901	0	0	0	0	0	0	Gre bic
1	Gre bic	T	2.7	1	1.5	0.625	3	3															1.10336	0.506471	0.827956	1.08413	1.10488	1.22652	1.7854	0.506471	0.827956	1.08413	1.10336	1.10336	1.10336	0	0	0	0	0	0	1.10336	0	0	0	0	0	0	Gre bic
1	Cis cor	T	2.8	0.7	0.2	0.225	1	1															0.445321	0.0795216	0.159043	0.318086	0.477129	0.636173	0.795216	0.0795216	0.159043	0.318086	0.445321	0.445321	0.445321	0	0	0	0	0	0	0.445321	0	0	0	0	0	0	Cis cor
1	Gre bic	T	3.3	2.6	3	1.4	3	3	1														6.7665	2.63321	4.4756	6.35283	6.76142	6.83108	7.69156	2.63321	4.4756	6.35283	6.76142	6.7665	6.7665	5.5	0	0	0	0	0	7.16032	39.3817	0	0	0	0	0	Gre bic
1	Gre bic	T	2.9	3.8	2.6	1.6	3	3			1											Browsed	7.76662	3.3644	5.58239	7.53447	7.76694	8.19047	10.7158	3.3644	5.58239	7.53447	7.76662	7.76662	7.76662	0	5.5	0	0	0	0	8.21865	0	45.2026	0	0	0	0	Gre bic
1	Gre bic	T	3	3.9	3	1.725	3	3	1														9.33885	3.93442	6.57179	8.99297	9.33885	9.68474	12.1059	3.93442	6.57179	8.99297	9.33885	9.33885	9.33885	5.5	0	0	0	0	0	9.88238	54.3531	0	0	0	0	0	Gre bic
1	Gre bic	T	2.3	1.6	1.3	0.725	3	3			1												1.26473	0.658508	1.03636	1.26192	1.30038	1.77542	3.31073	0.658508	1.03636	1.26192	1.26473	1.26473	1.26473	0	5.5	0	0	0	0	1.33834	0	7.36086	0	0	0	0	Gre bic
1	Gre bic	T	2.8	2.5	2	1.125	7	7			1												9.63901	1.98804	3.97608	7.91495	9.48941	2.74697	-18.5893	1.98804	3.97608	7.91495	9.63901	9.63901	9.63901	0	5.5	0	0	0	0	10.2	0	56.1	0	0	0	0	Gre bic
1	Gre bic	T	3.6	2.5	2	1.125	3	3			1												4.76652	1.72298	2.9709	4.34806	4.74446	4.77306	5.04686	1.72298	2.9709	4.34806	4.74446	4.76652	4.76652	0	5.5	0	0	0	0	5.04394	0	27.7417	0	0	0	0	Gre bic
1	Gre bic	T	3	2.4	2.4	1.2	3	3			1	1											4.51937	1.90399	3.1803	4.35199	4.51937	4.68675	5.85844	1.90399	3.1803	4.35199	4.51937	4.51937	4.51937	0	5.5	5.5	0	0	0	4.7824	0	26.3032	26.3032	0	0	0	Gre bic
1	Gre bic	T	3.8	1.3	1.7	0.75	3	3															2.23615	0.77164	1.34156	1.99848	2.21528	2.23647	2.30657	0.77164	1.34156	1.99848	2.21528	2.23615	2.23615	0	0	0	0	0	0	2.23615	0	0	0	0	0	0	Gre bic
1	Gre bic	T	3.2	1.6	2	0.9	3	3				1											2.71162	1.08281	1.83048	2.56863	2.71096	2.75399	3.19423	1.08281	1.83048	2.56863	2.71096	2.71162	2.71162	0	0	5.5	0	0	0	2.71162	0	0	15.7819	0	0	0	Gre bic
1	Gre bic	T	2.6	2.3	0.8	0.775	3	3			1												1.63369	0.772882	1.25297	1.61362	1.63964	1.88875	2.91864	0.772882	1.25297	1.61362	1.63369	1.63369	1.63369	0	5.5	0	0	0	0	1.72878	0	9.50828	0	0	0	0	Gre bic
1	Gre bic	T	3.2	2.7	2.4	1.275	3	3	1		1												5.44207	2.17314	3.67367	5.15509	5.44075	5.52711	6.41065	2.17314	3.67367	5.15509	5.44075	5.44207	5.44207	5.5	5.5	0	0	0	0	6.11469	33.6308	33.6308	0	0	0	0	Gre bic
1	Gre bic	T	1.5	2	2.2	1.05	7	7															3.98072	1.7315	3.28765	3.02611	-6.96463	-32.9615	-81.2413	1.7315	3.28765	3.98072	3.98072	3.98072	3.98072	0	0	0	0	0	0	3.98072	0	0	0	0	0	0	Gre bic
1	Gre bic	T	0.6	0.4	0.4	0.2	1	1															0.0753982	0.0628319	0.125664	0.251327	0.376991	0.502655	0.628319	0.0628319	0.0753982	0.0753982	0.0753982	0.0753982	0.0753982	0	0	0	0	0	0	0.0753982	0	0	0	0	0	0	Gre bic
1	Gre bic	T	2	2.1	3	1.275	3	3												1			3.4013	1.96637	2.97613	3.4013	3.82646	6.80259	14.8807	1.96637	2.97613	3.4013	3.4013	3.4013	3.4013	0	0	0	0	0	0	3.4013	0	0	0	0	0	0	Gre bic
1	Mae par	T	0.3	0.2	0.2	0.1	1	1														Browsed	0.00942478	0.015708	0.0314159	0.0628319	0.0942478	0.125664	0.15708	0.00942478	0.00942478	0.00942478	0.00942478	0.00942478	0.00942478	0	0	0	0	0	0	0.00942478	0	0	0	0	0	0	Mae par
1	Mae par	T	0.3	0.2	0.1	0.075	1	1														Browsed	0.00530144	0.00883573	0.0176715	0.0353429	0.0530144	0.0706858	0.0883573	0.00530144	0.00530144	0.00530144	0.00530144	0.00530144	0.00530144	0	0	0	0	0	0	0.00530144	0	0	0	0	0	0	Mae par
1	Mae par	T	0.4	0.3	0.2	0.125	1	1														Browsed	0.019635	0.0245437	0.0490874	0.0981748	0.147262	0.19635	0.245437	0.019635	0.019635	0.019635	0.019635	0.019635	0.019635	0	0	0	0	0	0	0.019635	0	0	0	0	0	0	Mae par
1	Mae par	T	0.3	0.1	0.1	0.05	1	1														Browsed	0.00235619	0.00392699	0.00785398	0.015708	0.0235619	0.0314159	0.0392699	0.00235619	0.00235619	0.00235619	0.00235619	0.00235619	0.00235619	0	0	0	0	0	0	0.00235619	0	0	0	0	0	0	Mae par
1	Mae par	T	0.5	0.6	0.4	0.25	1	1														Browsed	0.0981748	0.0981748	0.19635	0.392699	0.589049	0.785398	0.981748	0.0981748	0.0981748	0.0981748	0.0981748	0.0981748	0.0981748	0	0	0	0	0	0	0.0981748	0	0	0	0	0	0	Mae par
1	Mae par	T	0.5	0.4	0.5	0.225	1	1														Browsed	0.0795216	0.0795216	0.159043	0.318086	0.477129	0.636173	0.795216	0.0795216	0.0795216	0.0795216	0.0795216	0.0795216	0.0795216	0	0	0	0	0	0	0.0795216	0	0	0	0	0	0	Mae par
1	Mae par	T	0.3	0.3	0.2	0.125	1	1														Browsed	0.0147262	0.0245437	0.0490874	0.0981748	0.147262	0.19635	0.245437	0.0147262	0.0147262	0.0147262	0.0147262	0.0147262	0.0147262	0	0	0	0	0	0	0.0147262	0	0	0	0	0	0	Mae par
1	Mae par	T	0.2	0.3	0.1	0.1	1	1															0.00628319	0.015708	0.0314159	0.0628319	0.0942478	0.125664	0.15708	0.00628319	0.00628319	0.00628319	0.00628319	0.00628319	0.00628319	0	0	0	0	0	0	0.00628319	0	0	0	0	0	0	Mae par
1	Gre ina	T	2.1	0.6	0.7	0.325	1	1														Browsed	0.696845	0.165915	0.331831	0.663661	0.995492	1.32732	1.65915	0.165915	0.331831	0.663661	0.696845	0.696845	0.696845	0	0	0	0	0	0	0.696845	0	0	0	0	0	0	Gre ina
1	Mae par	T	0.5	0.5	0.5	0.25	1	1														Browsed	0.0981748	0.0981748	0.19635	0.392699	0.589049	0.785398	0.981748	0.0981748	0.0981748	0.0981748	0.0981748	0.0981748	0.0981748	0	0	0	0	0	0	0.0981748	0	0	0	0	0	0	Mae par
1	Mae par	T	0.5	0.3	0.4	0.175	1	1														Browsed	0.0481056	0.0481056	0.0962113	0.192423	0.288634	0.384845	0.481056	0.0481056	0.0481056	0.0481056	0.0481056	0.0481056	0.0481056	0	0	0	0	0	0	0.0481056	0	0	0	0	0	0	Mae par
1	Mae par	T	0.2	0.2	0.2	0.1	1	1														Browsed	0.00628319	0.015708	0.0314159	0.0628319	0.0942478	0.125664	0.15708	0.00628319	0.00628319	0.00628319	0.00628319	0.00628319	0.00628319	0	0	0	0	0	0	0.00628319	0	0	0	0	0	0	Mae par
1	Mae par	T	0.2	0.3	0.4	0.175	1	1															0.0192423	0.0481056	0.0962113	0.192423	0.288634	0.384845	0.481056	0.0192423	0.0192423	0.0192423	0.0192423	0.0192423	0.0192423	0	0	0	0	0	0	0.0192423	0	0	0	0	0	0	Mae par
1	Mae par	T	0.3	0.3	0.1	0.1	1	1														Browsed	0.00942478	0.015708	0.0314159	0.0628319	0.0942478	0.125664	0.15708	0.00942478	0.00942478	0.00942478	0.00942478	0.00942478	0.00942478	0	0	0	0	0	0	0.00942478	0	0	0	0	0	0	Mae par
1	Mae par	T	0.2	0.3	0.2	0.125	1	1															0.00981748	0.0245437	0.0490874	0.0981748	0.147262	0.19635	0.245437	0.00981748	0.00981748	0.00981748	0.00981748	0.00981748	0.00981748	0	0	0	0	0	0	0.00981748	0	0	0	0	0	0	Mae par
1	Dic cin	T	0.2	0.3	0.1	0.1	1	1															0.00628319	0.015708	0.0314159	0.0628319	0.0942478	0.125664	0.15708	0.00628319	0.00628319	0.00628319	0.00628319	0.00628319	0.00628319	0	0	0	0	0	0	0.00628319	0	0	0	0	0	0	Dic cin
1	Mae par	T	0.5	0.4	0.2	0.15	1	1														Browsed	0.0353429	0.0353429	0.0706858	0.141372	0.212058	0.282743	0.353429	0.0353429	0.0353429	0.0353429	0.0353429	0.0353429	0.0353429	0	0	0	0	0	0	0.0353429	0	0	0	0	0	0	Mae par
1	Mae par	T	0.5	0.4	0.4	0.2	1	1														Browsed	0.0628319	0.0628319	0.125664	0.251327	0.376991	0.502655	0.628319	0.0628319	0.0628319	0.0628319	0.0628319	0.0628319	0.0628319	0	0	0	0	0	0	0.0628319	0	0	0	0	0	0	Mae par
1	Mae par	T	0.5	0.6	0.4	0.25	1	1														Browsed	0.0981748	0.0981748	0.19635	0.392699	0.589049	0.785398	0.981748	0.0981748	0.0981748	0.0981748	0.0981748	0.0981748	0.0981748	0	0	0	0	0	0	0.0981748	0	0	0	0	0	0	Mae par
1	Gre bic	T	2.8	3.3	3	1.575	7	7	1														17.7211	3.89656	7.79311	15.0932	17.5151	8.7954	-17.3427	3.89656	7.79311	15.0932	17.7211	17.7211	17.7211	5.5	0	0	0	0	0	18.7525	103.139	0	0	0	0	0	Gre bic
1	Gre fla	T	0.6	0.6	0.4	0.25	3	3															0.0392306	0.039049	0.0508545	0.537605	2.54999	7.17775	15.5106	0.039049	0.0392306	0.0392306	0.0392306	0.0392306	0.0392306	0	0	0	0	0	0	0.0392306	0	0	0	0	0	0	Gre fla
1	Gre bic	T	1.5	1.2	2.3	0.875	1	1			1												3.60792	1.20264	2.40528	4.81056	7.21585	9.62113	12.0264	1.20264	2.40528	3.60792	3.60792	3.60792	3.60792	0	5.5	0	0	0	0	3.81791	0	20.9985	0	0	0	0	Gre bic
1	Gre bic	T	2	2.2	2.4	1.15	7	7			1												6.71367	2.07738	4.1506	6.71367	2.0583	-16.0924	-54.0154	2.07738	4.1506	6.71367	6.71367	6.71367	6.71367	0	5.5	0	0	0	0	7.10441	0	39.0743	0	0	0	0	Gre bic
1	Mae par	T	0.4	0.2	0.1	0.075	1	1															0.00706858	0.00883573	0.0176715	0.0353429	0.0530144	0.0706858	0.0883573	0.00706858	0.00706858	0.00706858	0.00706858	0.00706858	0.00706858	0	0	0	0	0	0	0.00706858	0	0	0	0	0	0	Mae par
1	Mae par	T	0.1	0.4	0.2	0.15	1	1															0.00706858	0.0353429	0.0706858	0.141372	0.212058	0.282743	0.353429	0.00706858	0.00706858	0.00706858	0.00706858	0.00706858	0.00706858	0	0	0	0	0	0	0.00706858	0	0	0	0	0	0	Mae par
1	Mae par	T	0.4	0.4	0.2	0.15	1	1														Browsed	0.0282743	0.0353429	0.0706858	0.141372	0.212058	0.282743	0.353429	0.0282743	0.0282743	0.0282743	0.0282743	0.0282743	0.0282743	0	0	0	0	0	0	0.0282743	0	0	0	0	0	0	Mae par
1	Mae par	T	0.4	0.3	0.3	0.15	1	1														Browsed	0.0282743	0.0353429	0.0706858	0.141372	0.212058	0.282743	0.353429	0.0282743	0.0282743	0.0282743	0.0282743	0.0282743	0.0282743	0	0	0	0	0	0	0.0282743	0	0	0	0	0	0	Mae par
1	Mae par	T	0.2	0.4	0.2	0.15	1	1														Browsed	0.0141372	0.0353429	0.0706858	0.141372	0.212058	0.282743	0.353429	0.0141372	0.0141372	0.0141372	0.0141372	0.0141372	0.0141372	0	0	0	0	0	0	0.0141372	0	0	0	0	0	0	Mae par
1	Mae par	T	0.2	0.4	0.2	0.15	1	1														Browsed	0.0141372	0.0353429	0.0706858	0.141372	0.212058	0.282743	0.353429	0.0141372	0.0141372	0.0141372	0.0141372	0.0141372	0.0141372	0	0	0	0	0	0	0.0141372	0	0	0	0	0	0	Mae par
1	Mae par	T	0.5	0.1	0.3	0.1	1	1														Browsed	0.015708	0.015708	0.0314159	0.0628319	0.0942478	0.125664	0.15708	0.015708	0.015708	0.015708	0.015708	0.015708	0.015708	0	0	0	0	0	0	0.015708	0	0	0	0	0	0	Mae par
1	Mae par	T	0.2	0.2	0.2	0.1	1	1														Browsed	0.00628319	0.015708	0.0314159	0.0628319	0.0942478	0.125664	0.15708	0.00628319	0.00628319	0.00628319	0.00628319	0.00628319	0.00628319	0	0	0	0	0	0	0.00628319	0	0	0	0	0	0	Mae par
1	Mae par	T	0.3	0.3	0.2	0.125	1	1														Browsed	0.0147262	0.0245437	0.0490874	0.0981748	0.147262	0.19635	0.245437	0.0147262	0.0147262	0.0147262	0.0147262	0.0147262	0.0147262	0	0	0	0	0	0	0.0147262	0	0	0	0	0	0	Mae par
1	Mae par	T	0.4	0.6	0.2	0.2	1	1														Browsed	0.0502655	0.0628319	0.125664	0.251327	0.376991	0.502655	0.628319	0.0502655	0.0502655	0.0502655	0.0502655	0.0502655	0.0502655	0	0	0	0	0	0	0.0502655	0	0	0	0	0	0	Mae par
1	Mae par	T	0.3	0.4	0.2	0.15	1	1														Browsed	0.0212058	0.0353429	0.0706858	0.141372	0.212058	0.282743	0.353429	0.0212058	0.0212058	0.0212058	0.0212058	0.0212058	0.0212058	0	0	0	0	0	0	0.0212058	0	0	0	0	0	0	Mae par
1	Mae par	T	0.3	0.7	0.3	0.25	1	1															0.0589049	0.0981748	0.19635	0.392699	0.589049	0.785398	0.981748	0.0589049	0.0589049	0.0589049	0.0589049	0.0589049	0.0589049	0	0	0	0	0	0	0.0589049	0	0	0	0	0	0	Mae par
1	Mae par	T	0.4	0.4	0.4	0.2	1	1														Browsed	0.0502655	0.0628319	0.125664	0.251327	0.376991	0.502655	0.628319	0.0502655	0.0502655	0.0502655	0.0502655	0.0502655	0.0502655	0	0	0	0	0	0	0.0502655	0	0	0	0	0	0	Mae par
1	Mae par	T	0.3	0.4	0.2	0.15	1	1														Browsed	0.0212058	0.0353429	0.0706858	0.141372	0.212058	0.282743	0.353429	0.0212058	0.0212058	0.0212058	0.0212058	0.0212058	0.0212058	0	0	0	0	0	0	0.0212058	0	0	0	0	0	0	Mae par
1	Mae par	T	0.2	0.3	0.3	0.15	1	1															0.0141372	0.0353429	0.0706858	0.141372	0.212058	0.282743	0.353429	0.0141372	0.0141372	0.0141372	0.0141372	0.0141372	0.0141372	0	0	0	0	0	0	0.0141372	0	0	0	0	0	0	Mae par
1	Mae par	T	0.2	0.2	0.1	0.075	1	1															0.00353429	0.00883573	0.0176715	0.0353429	0.0530144	0.0706858	0.0883573	0.00353429	0.00353429	0.00353429	0.00353429	0.00353429	0.00353429	0	0	0	0	0	0	0.00353429	0	0	0	0	0	0	Mae par
1	Mae par	T	0.3	0.5	0.3	0.2	1	1														Browsed	0.0376991	0.0628319	0.125664	0.251327	0.376991	0.502655	0.628319	0.0376991	0.0376991	0.0376991	0.0376991	0.0376991	0.0376991	0	0	0	0	0	0	0.0376991	0	0	0	0	0	0	Mae par
1	Mae par	T	0.4	0.5	0.2	0.175	1	1															0.0384845	0.0481056	0.0962113	0.192423	0.288634	0.384845	0.481056	0.0384845	0.0384845	0.0384845	0.0384845	0.0384845	0.0384845	0	0	0	0	0	0	0.0384845	0	0	0	0	0	0	Mae par
1	Mae par	T	0.3	0.4	0.3	0.175	1	1														Browsed	0.0288634	0.0481056	0.0962113	0.192423	0.288634	0.384845	0.481056	0.0288634	0.0288634	0.0288634	0.0288634	0.0288634	0.0288634	0	0	0	0	0	0	0.0288634	0	0	0	0	0	0	Mae par
1	Mae par	T	0.3	0.3	0.2	0.125	1	1														Browsed	0.0147262	0.0245437	0.0490874	0.0981748	0.147262	0.19635	0.245437	0.0147262	0.0147262	0.0147262	0.0147262	0.0147262	0.0147262	0	0	0	0	0	0	0.0147262	0	0	0	0	0	0	Mae par
1	Mae par	T	0.3	0.4	0.2	0.15	1	1														Browsed	0.0212058	0.0353429	0.0706858	0.141372	0.212058	0.282743	0.353429	0.0212058	0.0212058	0.0212058	0.0212058	0.0212058	0.0212058	0	0	0	0	0	0	0.0212058	0	0	0	0	0	0	Mae par
1	Mae par	T	0.4	0.2	0.1	0.075	1	1															0.00706858	0.00883573	0.0176715	0.0353429	0.0530144	0.0706858	0.0883573	0.00706858	0.00706858	0.00706858	0.00706858	0.00706858	0.00706858	0	0	0	0	0	0	0.00706858	0	0	0	0	0	0	Mae par
1	Mae par	T	0.3	0.4	0.3	0.175	1	1															0.0288634	0.0481056	0.0962113	0.192423	0.288634	0.384845	0.481056	0.0288634	0.0288634	0.0288634	0.0288634	0.0288634	0.0288634	0	0	0	0	0	0	0.0288634	0	0	0	0	0	0	Mae par
1	Mae par	T	0.3	0.5	0.4	0.225	1	1															0.0477129	0.0795216	0.159043	0.318086	0.477129	0.636173	0.795216	0.0477129	0.0477129	0.0477129	0.0477129	0.0477129	0.0477129	0	0	0	0	0	0	0.0477129	0	0	0	0	0	0	Mae par
1	Mae par	T	0.5	0.6	0.5	0.275	1	1														Browsed	0.118791	0.118791	0.237583	0.475166	0.712749	0.950332	1.18791	0.118791	0.118791	0.118791	0.118791	0.118791	0.118791	0	0	0	0	0	0	0.118791	0	0	0	0	0	0	Mae par
1	Mae par	T	0.4	0.4	0.2	0.15	1	1														Browsed	0.0282743	0.0353429	0.0706858	0.141372	0.212058	0.282743	0.353429	0.0282743	0.0282743	0.0282743	0.0282743	0.0282743	0.0282743	0	0	0	0	0	0	0.0282743	0	0	0	0	0	0	Mae par
1	Mae par	T	0.5	0.4	0.4	0.2	1	1														Browsed	0.0628319	0.0628319	0.125664	0.251327	0.376991	0.502655	0.628319	0.0628319	0.0628319	0.0628319	0.0628319	0.0628319	0.0628319	0	0	0	0	0	0	0.0628319	0	0	0	0	0	0	Mae par
1	Mae par	T	0.6	0.5	0.3	0.2	1	1															0.0753982	0.0628319	0.125664	0.251327	0.376991	0.502655	0.628319	0.0628319	0.0753982	0.0753982	0.0753982	0.0753982	0.0753982	0	0	0	0	0	0	0.0753982	0	0	0	0	0	0	Mae par
1	Mae par	T	0.5	0.5	0.4	0.225	1	1														Browsed	0.0795216	0.0795216	0.159043	0.318086	0.477129	0.636173	0.795216	0.0795216	0.0795216	0.0795216	0.0795216	0.0795216	0.0795216	0	0	0	0	0	0	0.0795216	0	0	0	0	0	0	Mae par
1	Mae par	T	0.5	0.1	0.1	0.05	1	1														Browsed	0.00392699	0.00392699	0.00785398	0.015708	0.0235619	0.0314159	0.0392699	0.00392699	0.00392699	0.00392699	0.00392699	0.00392699	0.00392699	0	0	0	0	0	0	0.00392699	0	0	0	0	0	0	Mae par
1	Mae par	T	0.2	0.4	0.2	0.15	1	1															0.0141372	0.0353429	0.0706858	0.141372	0.212058	0.282743	0.353429	0.0141372	0.0141372	0.0141372	0.0141372	0.0141372	0.0141372	0	0	0	0	0	0	0.0141372	0	0	0	0	0	0	Mae par
1	Mae par	T	0.5	0.4	0.3	0.175	1	1														Browsed	0.0481056	0.0481056	0.0962113	0.192423	0.288634	0.384845	0.481056	0.0481056	0.0481056	0.0481056	0.0481056	0.0481056	0.0481056	0	0	0	0	0	0	0.0481056	0	0	0	0	0	0	Mae par
1	Mae par	T	0.4	0.6	0.3	0.225	1	1														Browsed	0.0636173	0.0795216	0.159043	0.318086	0.477129	0.636173	0.795216	0.0636173	0.0636173	0.0636173	0.0636173	0.0636173	0.0636173	0	0	0	0	0	0	0.0636173	0	0	0	0	0	0	Mae par
1	Mae par	T	0.5	0.5	0.3	0.2	1	1															0.0628319	0.0628319	0.125664	0.251327	0.376991	0.502655	0.628319	0.0628319	0.0628319	0.0628319	0.0628319	0.0628319	0.0628319	0	0	0	0	0	0	0.0628319	0	0	0	0	0	0	Mae par
1	Mae par	T	0.4	0.6	0.4	0.25	1	1														Browsed	0.0785398	0.0981748	0.19635	0.392699	0.589049	0.785398	0.981748	0.0785398	0.0785398	0.0785398	0.0785398	0.0785398	0.0785398	0	0	0	0	0	0	0.0785398	0	0	0	0	0	0	Mae par
1	Mae par	T	0.5	0.4	0.3	0.175	1	1														Browsed	0.0481056	0.0481056	0.0962113	0.192423	0.288634	0.384845	0.481056	0.0481056	0.0481056	0.0481056	0.0481056	0.0481056	0.0481056	0	0	0	0	0	0	0.0481056	0	0	0	0	0	0	Mae par
1	Mae par	T	0.4	0.4	0.3	0.175	1	1															0.0384845	0.0481056	0.0962113	0.192423	0.288634	0.384845	0.481056	0.0384845	0.0384845	0.0384845	0.0384845	0.0384845	0.0384845	0	0	0	0	0	0	0.0384845	0	0	0	0	0	0	Mae par
1	Mae par	T	0.4	0.5	0.3	0.2	1	1														Browsed	0.0502655	0.0628319	0.125664	0.251327	0.376991	0.502655	0.628319	0.0502655	0.0502655	0.0502655	0.0502655	0.0502655	0.0502655	0	0	0	0	0	0	0.0502655	0	0	0	0	0	0	Mae par
1	Mae par	T	0.7	0.8	0.6	0.35	1	1														Browsed	0.269392	0.192423	0.384845	0.76969	1.15454	1.53938	1.92423	0.192423	0.269392	0.269392	0.269392	0.269392	0.269392	0	0	0	0	0	0	0.269392	0	0	0	0	0	0	Mae par
1	Mae par	T	0.9	1.2	0.7	0.475	1	1														Browsed	0.63794	0.354411	0.708822	1.41764	2.12647	2.83529	3.54411	0.354411	0.63794	0.63794	0.63794	0.63794	0.63794	0	0	0	0	0	0	0.63794	0	0	0	0	0	0	Mae par
1	Mae par	T	0.5	0.3	0.4	0.175	1	1															0.0481056	0.0481056	0.0962113	0.192423	0.288634	0.384845	0.481056	0.0481056	0.0481056	0.0481056	0.0481056	0.0481056	0.0481056	0	0	0	0	0	0	0.0481056	0	0	0	0	0	0	Mae par
1	Gre bic	T	0.2	0.7	0.4	0.275	1	1															0.0475166	0.118791	0.237583	0.475166	0.712749	0.950332	1.18791	0.0475166	0.0475166	0.0475166	0.0475166	0.0475166	0.0475166	0	0	0	0	0	0	0.0475166	0	0	0	0	0	0	Gre bic
1	Gre bic	T	1	0.8	0.5	0.325	1	1															0.331831	0.165915	0.331831	0.663661	0.995492	1.32732	1.65915	0.165915	0.331831	0.331831	0.331831	0.331831	0.331831	0	0	0	0	0	0	0.331831	0	0	0	0	0	0	Gre bic
1	Col mop	C	1.9	0.9	0.7	0.4	3	3	2													Browsed	0.31803	0.190799	0.284228	0.318076	0.379744	0.747432	1.69934	0.190799	0.284228	0.31803	0.31803	0.31803	0.31803	18	0	0	0	0	0	0.387841	6.98114	0	0	0	0	0	Col mop
1	Col mop	C	0.7	0.3	0.3	0.15	1	1															0.0494801	0.0353429	0.0706858	0.141372	0.212058	0.282743	0.353429	0.0353429	0.0494801	0.0494801	0.0494801	0.0494801	0.0494801	0	0	0	0	0	0	0.0494801	0	0	0	0	0	0	Col mop
1	Mae par	T	0.7	0.8	0.9	0.425	1	1			1											Browsed	0.397215	0.283725	0.56745	1.1349	1.70235	2.2698	2.83725	0.283725	0.397215	0.397215	0.397215	0.397215	0.397215	0	5.5	0	0	0	0	0.420333	0	2.31183	0	0	0	0	Mae par
1	Mae par	T	0.4	0.6	0.4	0.25	1	1															0.0785398	0.0981748	0.19635	0.392699	0.589049	0.785398	0.981748	0.0785398	0.0785398	0.0785398	0.0785398	0.0785398	0.0785398	0	0	0	0	0	0	0.0785398	0	0	0	0	0	0	Mae par
1	Mae par	T	0.7	0.5	0.3	0.2	1	1														Browsed	0.0879646	0.0628319	0.125664	0.251327	0.376991	0.502655	0.628319	0.0628319	0.0879646	0.0879646	0.0879646	0.0879646	0.0879646	0	0	0	0	0	0	0.0879646	0	0	0	0	0	0	Mae par
1	Mae par	T	0.3	0.4	0.2	0.15	1	1														Browsed	0.0212058	0.0353429	0.0706858	0.141372	0.212058	0.282743	0.353429	0.0212058	0.0212058	0.0212058	0.0212058	0.0212058	0.0212058	0	0	0	0	0	0	0.0212058	0	0	0	0	0	0	Mae par
1	Mae par	T	0.4	0.3	0.3	0.15	1	1														Browsed	0.0282743	0.0353429	0.0706858	0.141372	0.212058	0.282743	0.353429	0.0282743	0.0282743	0.0282743	0.0282743	0.0282743	0.0282743	0	0	0	0	0	0	0.0282743	0	0	0	0	0	0	Mae par
1	Aca tor	T	0.3	0.4	0.3	0.175	1	1															0.0288634	0.0481056	0.0962113	0.192423	0.288634	0.384845	0.481056	0.0288634	0.0288634	0.0288634	0.0288634	0.0288634	0.0288634	0	0	0	0	0	0	0.0288634	0	0	0	0	0	0	Aca tor
1	Mae par	T	0.5	0.7	0.4	0.275	1	1														Browsed	0.118791	0.118791	0.237583	0.475166	0.712749	0.950332	1.18791	0.118791	0.118791	0.118791	0.118791	0.118791	0.118791	0	0	0	0	0	0	0.118791	0	0	0	0	0	0	Mae par
1	Mae par	T	0.3	0.5	0.3	0.2	1	1														Browsed	0.0376991	0.0628319	0.125664	0.251327	0.376991	0.502655	0.628319	0.0376991	0.0376991	0.0376991	0.0376991	0.0376991	0.0376991	0	0	0	0	0	0	0.0376991	0	0	0	0	0	0	Mae par
1	Mae par	T	0.5	0.5	0.6	0.275	1	1															0.118791	0.118791	0.237583	0.475166	0.712749	0.950332	1.18791	0.118791	0.118791	0.118791	0.118791	0.118791	0.118791	0	0	0	0	0	0	0.118791	0	0	0	0	0	0	Mae par
1	Gre bic	T	0.3	0.4	0.2	0.15	1	1															0.0212058	0.0353429	0.0706858	0.141372	0.212058	0.282743	0.353429	0.0212058	0.0212058	0.0212058	0.0212058	0.0212058	0.0212058	0	0	0	0	0	0	0.0212058	0	0	0	0	0	0	Gre bic
1	Mae par	T	0.4	0.6	0.2	0.2	1	1														Browsed	0.0502655	0.0628319	0.125664	0.251327	0.376991	0.502655	0.628319	0.0502655	0.0502655	0.0502655	0.0502655	0.0502655	0.0502655	0	0	0	0	0	0	0.0502655	0	0	0	0	0	0	Mae par
1	Mae par	T	0.2	0.2	0.2	0.1	1	1															0.00628319	0.015708	0.0314159	0.0628319	0.0942478	0.125664	0.15708	0.00628319	0.00628319	0.00628319	0.00628319	0.00628319	0.00628319	0	0	0	0	0	0	0.00628319	0	0	0	0	0	0	Mae par
1	Mae par	T	0.4	0.5	0.2	0.175	1	1														Browsed	0.0384845	0.0481056	0.0962113	0.192423	0.288634	0.384845	0.481056	0.0384845	0.0384845	0.0384845	0.0384845	0.0384845	0.0384845	0	0	0	0	0	0	0.0384845	0	0	0	0	0	0	Mae par
1	Mae par	T	0.3	0.3	0.2	0.125	1	1														Browsed	0.0147262	0.0245437	0.0490874	0.0981748	0.147262	0.19635	0.245437	0.0147262	0.0147262	0.0147262	0.0147262	0.0147262	0.0147262	0	0	0	0	0	0	0.0147262	0	0	0	0	0	0	Mae par
1	Aca tor	T	0.5	0.5	0.2	0.175	1	1															0.0481056	0.0481056	0.0962113	0.192423	0.288634	0.384845	0.481056	0.0481056	0.0481056	0.0481056	0.0481056	0.0481056	0.0481056	0	0	0	0	0	0	0.0481056	0	0	0	0	0	0	Aca tor
1	Aca tor	T	0.3	0.2	0.2	0.1	1	1															0.00942478	0.015708	0.0314159	0.0628319	0.0942478	0.125664	0.15708	0.00942478	0.00942478	0.00942478	0.00942478	0.00942478	0.00942478	0	0	0	0	0	0	0.00942478	0	0	0	0	0	0	Aca tor
1	Gre bic	T	1.6	2.4	1.8	1.05	3	3															1.84541	1.24574	1.74809	1.87424	3.08169	8.07367	19.5534	1.24574	1.74809	1.84541	1.84541	1.84541	1.84541	0	0	0	0	0	0	1.84541	0	0	0	0	0	0	Gre bic
1	Gre bic	T	0.4	0.4	0.4	0.2	1	1															0.0502655	0.0628319	0.125664	0.251327	0.376991	0.502655	0.628319	0.0502655	0.0502655	0.0502655	0.0502655	0.0502655	0.0502655	0	0	0	0	0	0	0.0502655	0	0	0	0	0	0	Gre bic
1	Mae par	T	0.2	0.2	0.1	0.075	1	1															0.00353429	0.00883573	0.0176715	0.0353429	0.0530144	0.0706858	0.0883573	0.00353429	0.00353429	0.00353429	0.00353429	0.00353429	0.00353429	0	0	0	0	0	0	0.00353429	0	0	0	0	0	0	Mae par
1	Mae par	T	0.2	0.2	0.1	0.075	1	1															0.00353429	0.00883573	0.0176715	0.0353429	0.0530144	0.0706858	0.0883573	0.00353429	0.00353429	0.00353429	0.00353429	0.00353429	0.00353429	0	0	0	0	0	0	0.00353429	0	0	0	0	0	0	Mae par
1	Mae par	T	0.5	0.1	0.1	0.05	1	1														Browsed	0.00392699	0.00392699	0.00785398	0.015708	0.0235619	0.0314159	0.0392699	0.00392699	0.00392699	0.00392699	0.00392699	0.00392699	0.00392699	0	0	0	0	0	0	0.00392699	0	0	0	0	0	0	Mae par
1	Mae par	T	0.4	0.4	0.2	0.15	1	1														Browsed	0.0282743	0.0353429	0.0706858	0.141372	0.212058	0.282743	0.353429	0.0282743	0.0282743	0.0282743	0.0282743	0.0282743	0.0282743	0	0	0	0	0	0	0.0282743	0	0	0	0	0	0	Mae par
1	Mae par	T	0.5	0.4	0.3	0.175	1	1														Browsed	0.0481056	0.0481056	0.0962113	0.192423	0.288634	0.384845	0.481056	0.0481056	0.0481056	0.0481056	0.0481056	0.0481056	0.0481056	0	0	0	0	0	0	0.0481056	0	0	0	0	0	0	Mae par
1	Mae par	T	0.3	0.4	0.3	0.175	1	1														Browsed	0.0288634	0.0481056	0.0962113	0.192423	0.288634	0.384845	0.481056	0.0288634	0.0288634	0.0288634	0.0288634	0.0288634	0.0288634	0	0	0	0	0	0	0.0288634	0	0	0	0	0	0	Mae par
1	Mae par	T	0.3	0.2	0.2	0.1	1	1														Browsed	0.00942478	0.015708	0.0314159	0.0628319	0.0942478	0.125664	0.15708	0.00942478	0.00942478	0.00942478	0.00942478	0.00942478	0.00942478	0	0	0	0	0	0	0.00942478	0	0	0	0	0	0	Mae par
1	Mae par	T	0.3	0.2	0.2	0.1	1	1															0.00942478	0.015708	0.0314159	0.0628319	0.0942478	0.125664	0.15708	0.00942478	0.00942478	0.00942478	0.00942478	0.00942478	0.00942478	0	0	0	0	0	0	0.00942478	0	0	0	0	0	0	Mae par
1	Mae par	T	0.2	0.3	0.3	0.15	1	1														Browsed	0.0141372	0.0353429	0.0706858	0.141372	0.212058	0.282743	0.353429	0.0141372	0.0141372	0.0141372	0.0141372	0.0141372	0.0141372	0	0	0	0	0	0	0.0141372	0	0	0	0	0	0	Mae par
1	Mae par	T	0.4	0.1	0.1	0.05	1	1														Browsed	0.00314159	0.00392699	0.00785398	0.015708	0.0235619	0.0314159	0.0392699	0.00314159	0.00314159	0.00314159	0.00314159	0.00314159	0.00314159	0	0	0	0	0	0	0.00314159	0	0	0	0	0	0	Mae par
1	Mae par	T	0.2	0.3	0.2	0.125	1	1															0.00981748	0.0245437	0.0490874	0.0981748	0.147262	0.19635	0.245437	0.00981748	0.00981748	0.00981748	0.00981748	0.00981748	0.00981748	0	0	0	0	0	0	0.00981748	0	0	0	0	0	0	Mae par
1	Mae par	T	0.5	0.4	0.3	0.175	1	1															0.0481056	0.0481056	0.0962113	0.192423	0.288634	0.384845	0.481056	0.0481056	0.0481056	0.0481056	0.0481056	0.0481056	0.0481056	0	0	0	0	0	0	0.0481056	0	0	0	0	0	0	Mae par
1	Mae par	T	0.5	0.4	0.6	0.25	1	1														Browsed	0.0981748	0.0981748	0.19635	0.392699	0.589049	0.785398	0.981748	0.0981748	0.0981748	0.0981748	0.0981748	0.0981748	0.0981748	0	0	0	0	0	0	0.0981748	0	0	0	0	0	0	Mae par
1	Gre bic	T	3.1	4.6	4.6	2.3	7	7			1												38.7522	8.30951	16.6073	31.4104	38.6811	32.1427	5.51814	8.30951	16.6073	31.4104	38.6811	38.7522	38.7522	0	5.5	0	0	0	0	41.0077	0	225.542	0	0	0	0	Gre bic
1	Mae par	T	0.5	0.7	0.5	0.3	1	1														Browsed	0.141372	0.141372	0.282743	0.565487	0.84823	1.13097	1.41372	0.141372	0.141372	0.141372	0.141372	0.141372	0.141372	0	0	0	0	0	0	0.141372	0	0	0	0	0	0	Mae par
1	Gre bic	T	3.5	2.7	2.3	1.25	3	3															5.72113	2.11832	3.63617	5.27078	5.70446	5.73781	6.17149	2.11832	3.63617	5.27078	5.70446	5.72113	5.72113	0	0	0	0	0	0	5.72113	0	0	0	0	0	0	Gre bic
1	Mae par	T	0.5	0.5	0.2	0.175	1	1														Browsed	0.0481056	0.0481056	0.0962113	0.192423	0.288634	0.384845	0.481056	0.0481056	0.0481056	0.0481056	0.0481056	0.0481056	0.0481056	0	0	0	0	0	0	0.0481056	0	0	0	0	0	0	Mae par
1	Mae par	T	0.4	0.4	0.2	0.15	1	1														Browsed	0.0282743	0.0353429	0.0706858	0.141372	0.212058	0.282743	0.353429	0.0282743	0.0282743	0.0282743	0.0282743	0.0282743	0.0282743	0	0	0	0	0	0	0.0282743	0	0	0	0	0	0	Mae par
1	Mae par	T	0.5	0.2	0.2	0.1	1	1															0.015708	0.015708	0.0314159	0.0628319	0.0942478	0.125664	0.15708	0.015708	0.015708	0.015708	0.015708	0.015708	0.015708	0	0	0	0	0	0	0.015708	0	0	0	0	0	0	Mae par
1	Mae par	T	0.3	0.3	0.2	0.125	1	1														Browsed	0.0147262	0.0245437	0.0490874	0.0981748	0.147262	0.19635	0.245437	0.0147262	0.0147262	0.0147262	0.0147262	0.0147262	0.0147262	0	0	0	0	0	0	0.0147262	0	0	0	0	0	0	Mae par
1	Gre bic	T	0.4	0.3	0.5	0.2	1	1															0.0502655	0.0628319	0.125664	0.251327	0.376991	0.502655	0.628319	0.0502655	0.0502655	0.0502655	0.0502655	0.0502655	0.0502655	0	0	0	0	0	0	0.0502655	0	0	0	0	0	0	Gre bic
1	Mae par	T	0.4	0.3	0.1	0.1	1	1															0.0125664	0.015708	0.0314159	0.0628319	0.0942478	0.125664	0.15708	0.0125664	0.0125664	0.0125664	0.0125664	0.0125664	0.0125664	0	0	0	0	0	0	0.0125664	0	0	0	0	0	0	Mae par
1	Mae par	T	0.5	0.3	0.2	0.125	1	1														Browsed	0.0245437	0.0245437	0.0490874	0.0981748	0.147262	0.19635	0.245437	0.0245437	0.0245437	0.0245437	0.0245437	0.0245437	0.0245437	0	0	0	0	0	0	0.0245437	0	0	0	0	0	0	Mae par
1	Mae par	T	0.5	0.7	0.5	0.3	1	1														Browsed	0.141372	0.141372	0.282743	0.565487	0.84823	1.13097	1.41372	0.141372	0.141372	0.141372	0.141372	0.141372	0.141372	0	0	0	0	0	0	0.141372	0	0	0	0	0	0	Mae par
1	Mae par	T	0.4	0.5	0.4	0.225	1	1														Browsed	0.0636173	0.0795216	0.159043	0.318086	0.477129	0.636173	0.795216	0.0636173	0.0636173	0.0636173	0.0636173	0.0636173	0.0636173	0	0	0	0	0	0	0.0636173	0	0	0	0	0	0	Mae par
1	Mae par	T	0.4	0.5	0.2	0.175	1	1														Browsed	0.0384845	0.0481056	0.0962113	0.192423	0.288634	0.384845	0.481056	0.0384845	0.0384845	0.0384845	0.0384845	0.0384845	0.0384845	0	0	0	0	0	0	0.0384845	0	0	0	0	0	0	Mae par
1	Mae par	T	0.6	0.4	0.2	0.15	1	1														Browsed	0.0424115	0.0353429	0.0706858	0.141372	0.212058	0.282743	0.353429	0.0353429	0.0424115	0.0424115	0.0424115	0.0424115	0.0424115	0	0	0	0	0	0	0.0424115	0	0	0	0	0	0	Mae par
1	Mae par	T	0.4	0.5	0.4	0.225	1	1														Browsed	0.0636173	0.0795216	0.159043	0.318086	0.477129	0.636173	0.795216	0.0636173	0.0636173	0.0636173	0.0636173	0.0636173	0.0636173	0	0	0	0	0	0	0.0636173	0	0	0	0	0	0	Mae par
1	Mae par	T	0.3	0.3	0.2	0.125	1	1														Browsed	0.0147262	0.0245437	0.0490874	0.0981748	0.147262	0.19635	0.245437	0.0147262	0.0147262	0.0147262	0.0147262	0.0147262	0.0147262	0	0	0	0	0	0	0.0147262	0	0	0	0	0	0	Mae par
1	Mae par	T	0.3	0.4	0.1	0.125	1	1															0.0147262	0.0245437	0.0490874	0.0981748	0.147262	0.19635	0.245437	0.0147262	0.0147262	0.0147262	0.0147262	0.0147262	0.0147262	0	0	0	0	0	0	0.0147262	0	0	0	0	0	0	Mae par
1	Mae par	T	0.5	0.4	0.6	0.25	1	1														Browsed	0.0981748	0.0981748	0.19635	0.392699	0.589049	0.785398	0.981748	0.0981748	0.0981748	0.0981748	0.0981748	0.0981748	0.0981748	0	0	0	0	0	0	0.0981748	0	0	0	0	0	0	Mae par
1	Mae par	T	0.4	0.7	0.6	0.325	1	1														Browsed	0.132732	0.165915	0.331831	0.663661	0.995492	1.32732	1.65915	0.132732	0.132732	0.132732	0.132732	0.132732	0.132732	0	0	0	0	0	0	0.132732	0	0	0	0	0	0	Mae par
						#DIV/0!		#DIV/0!															#DIV/0!	#DIV/0!	#DIV/0!	#DIV/0!	#DIV/0!	#DIV/0!	#DIV/0!	#DIV/0!	#DIV/0!	#DIV/0!	#DIV/0!	#DIV/0!	#DIV/0!	0	0	0	0	0	0	#DIV/0!	#DIV/0!	#DIV/0!	#DIV/0!	#DIV/0!	#DIV/0!	#DIV/0!	0
						#DIV/0!		#DIV/0!															#DIV/0!	#DIV/0!	#DIV/0!	#DIV/0!	#DIV/0!	#DIV/0!	#DIV/0!	#DIV/0!	#DIV/0!	#DIV/0!	#DIV/0!	#DIV/0!	#DIV/0!	0	0	0	0	0	0	#DIV/0!	#DIV/0!	#DIV/0!	#DIV/0!	#DIV/0!	#DIV/0!	#DIV/0!	0
						#DIV/0!		#DIV/0!															#DIV/0!	#DIV/0!	#DIV/0!	#DIV/0!	#DIV/0!	#DIV/0!	#DIV/0!	#DIV/0!	#DIV/0!	#DIV/0!	#DIV/0!	#DIV/0!	#DIV/0!	0	0	0	0	0	0	#DIV/0!	#DIV/0!	#DIV/0!	#DIV/0!	#DIV/0!	#DIV/0!	#DIV/0!	0
						#DIV/0!		#DIV/0!															#DIV/0!	#DIV/0!	#DIV/0!	#DIV/0!	#DIV/0!	#DIV/0!	#DIV/0!	#DIV/0!	#DIV/0!	#DIV/0!	#DIV/0!	#DIV/0!	#DIV/0!	0	0	0	0	0	0	#DIV/0!	#DIV/0!	#DIV/0!	#DIV/0!	#DIV/0!	#DIV/0!	#DIV/0!	0
						#DIV/0!		#DIV/0!															#DIV/0!	#DIV/0!	#DIV/0!	#DIV/0!	#DIV/0!	#DIV/0!	#DIV/0!	#DIV/0!	#DIV/0!	#DIV/0!	#DIV/0!	#DIV/0!	#DIV/0!	0	0	0	0	0	0	#DIV/0!	#DIV/0!	#DIV/0!	#DIV/0!	#DIV/0!	#DIV/0!	#DIV/0!	0
						#DIV/0!		#DIV/0!															#DIV/0!	#DIV/0!	#DIV/0!	#DIV/0!	#DIV/0!	#DIV/0!	#DIV/0!	#DIV/0!	#DIV/0!	#DIV/0!	#DIV/0!	#DIV/0!	#DIV/0!	0	0	0	0	0	0	#DIV/0!	#DIV/0!	#DIV/0!	#DIV/0!	#DIV/0!	#DIV/0!	#DIV/0!	0
						#DIV/0!		#DIV/0!															#DIV/0!	#DIV/0!	#DIV/0!	#DIV/0!	#DIV/0!	#DIV/0!	#DIV/0!	#DIV/0!	#DIV/0!	#DIV/0!	#DIV/0!	#DIV/0!	#DIV/0!	0	0	0	0	0	0	#DIV/0!	#DIV/0!	#DIV/0!	#DIV/0!	#DIV/0!	#DIV/0!	#DIV/0!	0
						#DIV/0!		#DIV/0!															#DIV/0!	#DIV/0!	#DIV/0!	#DIV/0!	#DIV/0!	#DIV/0!	#DIV/0!	#DIV/0!	#DIV/0!	#DIV/0!	#DIV/0!	#DIV/0!	#DIV/0!	0	0	0	0	0	0	#DIV/0!	#DIV/0!	#DIV/0!	#DIV/0!	#DIV/0!	#DIV/0!	#DIV/0!	0
						#DIV/0!		#DIV/0!															#DIV/0!	#DIV/0!	#DIV/0!	#DIV/0!	#DIV/0!	#DIV/0!	#DIV/0!	#DIV/0!	#DIV/0!	#DIV/0!	#DIV/0!	#DIV/0!	#DIV/0!	0	0	0	0	0	0	#DIV/0!	#DIV/0!	#DIV/0!	#DIV/0!	#DIV/0!	#DIV/0!	#DIV/0!	0
						#DIV/0!		#DIV/0!															#DIV/0!	#DIV/0!	#DIV/0!	#DIV/0!	#DIV/0!	#DIV/0!	#DIV/0!	#DIV/0!	#DIV/0!	#DIV/0!	#DIV/0!	#DIV/0!	#DIV/0!	0	0	0	0	0	0	#DIV/0!	#DIV/0!	#DIV/0!	#DIV/0!	#DIV/0!	#DIV/0!	#DIV/0!	0
						#DIV/0!		#DIV/0!															#DIV/0!	#DIV/0!	#DIV/0!	#DIV/0!	#DIV/0!	#DIV/0!	#DIV/0!	#DIV/0!	#DIV/0!	#DIV/0!	#DIV/0!	#DIV/0!	#DIV/0!	0	0	0	0	0	0	#DIV/0!	#DIV/0!	#DIV/0!	#DIV/0!	#DIV/0!	#DIV/0!	#DIV/0!	0
						#DIV/0!		#DIV/0!															#DIV/0!	#DIV/0!	#DIV/0!	#DIV/0!	#DIV/0!	#DIV/0!	#DIV/0!	#DIV/0!	#DIV/0!	#DIV/0!	#DIV/0!	#DIV/0!	#DIV/0!	0	0	0	0	0	0	#DIV/0!	#DIV/0!	#DIV/0!	#DIV/0!	#DIV/0!	#DIV/0!	#DIV/0!	0
						#DIV/0!		#DIV/0!															#DIV/0!	#DIV/0!	#DIV/0!	#DIV/0!	#DIV/0!	#DIV/0!	#DIV/0!	#DIV/0!	#DIV/0!	#DIV/0!	#DIV/0!	#DIV/0!	#DIV/0!	0	0	0	0	0	0	#DIV/0!	#DIV/0!	#DIV/0!	#DIV/0!	#DIV/0!	#DIV/0!	#DIV/0!	0
						#DIV/0!		#DIV/0!															#DIV/0!	#DIV/0!	#DIV/0!	#DIV/0!	#DIV/0!	#DIV/0!	#DIV/0!	#DIV/0!	#DIV/0!	#DIV/0!	#DIV/0!	#DIV/0!	#DIV/0!	0	0	0	0	0	0	#DIV/0!	#DIV/0!	#DIV/0!	#DIV/0!	#DIV/0!	#DIV/0!	#DIV/0!	0
						#DIV/0!		#DIV/0!															#DIV/0!	#DIV/0!	#DIV/0!	#DIV/0!	#DIV/0!	#DIV/0!	#DIV/0!	#DIV/0!	#DIV/0!	#DIV/0!	#DIV/0!	#DIV/0!	#DIV/0!	0	0	0	0	0	0	#DIV/0!	#DIV/0!	#DIV/0!	#DIV/0!	#DIV/0!	#DIV/0!	#DIV/0!	0
						#DIV/0!		#DIV/0!															#DIV/0!	#DIV/0!	#DIV/0!	#DIV/0!	#DIV/0!	#DIV/0!	#DIV/0!	#DIV/0!	#DIV/0!	#DIV/0!	#DIV/0!	#DIV/0!	#DIV/0!	0	0	0	0	0	0	#DIV/0!	#DIV/0!	#DIV/0!	#DIV/0!	#DIV/0!	#DIV/0!	#DIV/0!	0
						#DIV/0!		#DIV/0!															#DIV/0!	#DIV/0!	#DIV/0!	#DIV/0!	#DIV/0!	#DIV/0!	#DIV/0!	#DIV/0!	#DIV/0!	#DIV/0!	#DIV/0!	#DIV/0!	#DIV/0!	0	0	0	0	0	0	#DIV/0!	#DIV/0!	#DIV/0!	#DIV/0!	#DIV/0!	#DIV/0!	#DIV/0!	0
						#DIV/0!		#DIV/0!															#DIV/0!	#DIV/0!	#DIV/0!	#DIV/0!	#DIV/0!	#DIV/0!	#DIV/0!	#DIV/0!	#DIV/0!	#DIV/0!	#DIV/0!	#DIV/0!	#DIV/0!	0	0	0	0	0	0	#DIV/0!	#DIV/0!	#DIV/0!	#DIV/0!	#DIV/0!	#DIV/0!	#DIV/0!	0
						#DIV/0!		#DIV/0!															#DIV/0!	#DIV/0!	#DIV/0!	#DIV/0!	#DIV/0!	#DIV/0!	#DIV/0!	#DIV/0!	#DIV/0!	#DIV/0!	#DIV/0!	#DIV/0!	#DIV/0!	0	0	0	0	0	0	#DIV/0!	#DIV/0!	#DIV/0!	#DIV/0!	#DIV/0!	#DIV/0!	#DIV/0!	0
						#DIV/0!		#DIV/0!															#DIV/0!	#DIV/0!	#DIV/0!	#DIV/0!	#DIV/0!	#DIV/0!	#DIV/0!	#DIV/0!	#DIV/0!	#DIV/0!	#DIV/0!	#DIV/0!	#DIV/0!	0	0	0	0	0	0	#DIV/0!	#DIV/0!	#DIV/0!	#DIV/0!	#DIV/0!	#DIV/0!	#DIV/0!	0
						#DIV/0!		#DIV/0!															#DIV/0!	#DIV/0!	#DIV/0!	#DIV/0!	#DIV/0!	#DIV/0!	#DIV/0!	#DIV/0!	#DIV/0!	#DIV/0!	#DIV/0!	#DIV/0!	#DIV/0!	0	0	0	0	0	0	#DIV/0!	#DIV/0!	#DIV/0!	#DIV/0!	#DIV/0!	#DIV/0!	#DIV/0!	0
						#DIV/0!		#DIV/0!															#DIV/0!	#DIV/0!	#DIV/0!	#DIV/0!	#DIV/0!	#DIV/0!	#DIV/0!	#DIV/0!	#DIV/0!	#DIV/0!	#DIV/0!	#DIV/0!	#DIV/0!	0	0	0	0	0	0	#DIV/0!	#DIV/0!	#DIV/0!	#DIV/0!	#DIV/0!	#DIV/0!	#DIV/0!	0
						#DIV/0!		#DIV/0!															#DIV/0!	#DIV/0!	#DIV/0!	#DIV/0!	#DIV/0!	#DIV/0!	#DIV/0!	#DIV/0!	#DIV/0!	#DIV/0!	#DIV/0!	#DIV/0!	#DIV/0!	0	0	0	0	0	0	#DIV/0!	#DIV/0!	#DIV/0!	#DIV/0!	#DIV/0!	#DIV/0!	#DIV/0!	0
						#DIV/0!		#DIV/0!															#DIV/0!	#DIV/0!	#DIV/0!	#DIV/0!	#DIV/0!	#DIV/0!	#DIV/0!	#DIV/0!	#DIV/0!	#DIV/0!	#DIV/0!	#DIV/0!	#DIV/0!	0	0	0	0	0	0	#DIV/0!	#DIV/0!	#DIV/0!	#DIV/0!	#DIV/0!	#DIV/0!	#DIV/0!	0
						#DIV/0!		#DIV/0!															#DIV/0!	#DIV/0!	#DIV/0!	#DIV/0!	#DIV/0!	#DIV/0!	#DIV/0!	#DIV/0!	#DIV/0!	#DIV/0!	#DIV/0!	#DIV/0!	#DIV/0!	0	0	0	0	0	0	#DIV/0!	#DIV/0!	#DIV/0!	#DIV/0!	#DIV/0!	#DIV/0!	#DIV/0!	0
						#DIV/0!		#DIV/0!															#DIV/0!	#DIV/0!	#DIV/0!	#DIV/0!	#DIV/0!	#DIV/0!	#DIV/0!	#DIV/0!	#DIV/0!	#DIV/0!	#DIV/0!	#DIV/0!	#DIV/0!	0	0	0	0	0	0	#DIV/0!	#DIV/0!	#DIV/0!	#DIV/0!	#DIV/0!	#DIV/0!	#DIV/0!	0
						#DIV/0!		#DIV/0!															#DIV/0!	#DIV/0!	#DIV/0!	#DIV/0!	#DIV/0!	#DIV/0!	#DIV/0!	#DIV/0!	#DIV/0!	#DIV/0!	#DIV/0!	#DIV/0!	#DIV/0!	0	0	0	0	0	0	#DIV/0!	#DIV/0!	#DIV/0!	#DIV/0!	#DIV/0!	#DIV/0!	#DIV/0!	0
						#DIV/0!		#DIV/0!															#DIV/0!	#DIV/0!	#DIV/0!	#DIV/0!	#DIV/0!	#DIV/0!	#DIV/0!	#DIV/0!	#DIV/0!	#DIV/0!	#DIV/0!	#DIV/0!	#DIV/0!	0	0	0	0	0	0	#DIV/0!	#DIV/0!	#DIV/0!	#DIV/0!	#DIV/0!	#DIV/0!	#DIV/0!	0
						#DIV/0!		#DIV/0!															#DIV/0!	#DIV/0!	#DIV/0!	#DIV/0!	#DIV/0!	#DIV/0!	#DIV/0!	#DIV/0!	#DIV/0!	#DIV/0!	#DIV/0!	#DIV/0!	#DIV/0!	0	0	0	0	0	0	#DIV/0!	#DIV/0!	#DIV/0!	#DIV/0!	#DIV/0!	#DIV/0!	#DIV/0!	0
						#DIV/0!		#DIV/0!															#DIV/0!	#DIV/0!	#DIV/0!	#DIV/0!	#DIV/0!	#DIV/0!	#DIV/0!	#DIV/0!	#DIV/0!	#DIV/0!	#DIV/0!	#DIV/0!	#DIV/0!	0	0	0	0	0	0	#DIV/0!	#DIV/0!	#DIV/0!	#DIV/0!	#DIV/0!	#DIV/0!	#DIV/0!	0
						#DIV/0!		#DIV/0!															#DIV/0!	#DIV/0!	#DIV/0!	#DIV/0!	#DIV/0!	#DIV/0!	#DIV/0!	#DIV/0!	#DIV/0!	#DIV/0!	#DIV/0!	#DIV/0!	#DIV/0!	0	0	0	0	0	0	#DIV/0!	#DIV/0!	#DIV/0!	#DIV/0!	#DIV/0!	#DIV/0!	#DIV/0!	0
						#DIV/0!		#DIV/0!															#DIV/0!	#DIV/0!	#DIV/0!	#DIV/0!	#DIV/0!	#DIV/0!	#DIV/0!	#DIV/0!	#DIV/0!	#DIV/0!	#DIV/0!	#DIV/0!	#DIV/0!	0	0	0	0	0	0	#DIV/0!	#DIV/0!	#DIV/0!	#DIV/0!	#DIV/0!	#DIV/0!	#DIV/0!	0
						#DIV/0!		#DIV/0!															#DIV/0!	#DIV/0!	#DIV/0!	#DIV/0!	#DIV/0!	#DIV/0!	#DIV/0!	#DIV/0!	#DIV/0!	#DIV/0!	#DIV/0!	#DIV/0!	#DIV/0!	0	0	0	0	0	0	#DIV/0!	#DIV/0!	#DIV/0!	#DIV/0!	#DIV/0!	#DIV/0!	#DIV/0!	0
						#DIV/0!		#DIV/0!															#DIV/0!	#DIV/0!	#DIV/0!	#DIV/0!	#DIV/0!	#DIV/0!	#DIV/0!	#DIV/0!	#DIV/0!	#DIV/0!	#DIV/0!	#DIV/0!	#DIV/0!	0	0	0	0	0	0	#DIV/0!	#DIV/0!	#DIV/0!	#DIV/0!	#DIV/0!	#DIV/0!	#DIV/0!	0
						#DIV/0!		#DIV/0!															#DIV/0!	#DIV/0!	#DIV/0!	#DIV/0!	#DIV/0!	#DIV/0!	#DIV/0!	#DIV/0!	#DIV/0!	#DIV/0!	#DIV/0!	#DIV/0!	#DIV/0!	0	0	0	0	0	0	#DIV/0!	#DIV/0!	#DIV/0!	#DIV/0!	#DIV/0!	#DIV/0!	#DIV/0!	0
						#DIV/0!		#DIV/0!															#DIV/0!	#DIV/0!	#DIV/0!	#DIV/0!	#DIV/0!	#DIV/0!	#DIV/0!	#DIV/0!	#DIV/0!	#DIV/0!	#DIV/0!	#DIV/0!	#DIV/0!	0	0	0	0	0	0	#DIV/0!	#DIV/0!	#DIV/0!	#DIV/0!	#DIV/0!	#DIV/0!	#DIV/0!	0
						#DIV/0!		#DIV/0!															#DIV/0!	#DIV/0!	#DIV/0!	#DIV/0!	#DIV/0!	#DIV/0!	#DIV/0!	#DIV/0!	#DIV/0!	#DIV/0!	#DIV/0!	#DIV/0!	#DIV/0!	0	0	0	0	0	0	#DIV/0!	#DIV/0!	#DIV/0!	#DIV/0!	#DIV/0!	#DIV/0!	#DIV/0!	0
						#DIV/0!		#DIV/0!															#DIV/0!	#DIV/0!	#DIV/0!	#DIV/0!	#DIV/0!	#DIV/0!	#DIV/0!	#DIV/0!	#DIV/0!	#DIV/0!	#DIV/0!	#DIV/0!	#DIV/0!	0	0	0	0	0	0	#DIV/0!	#DIV/0!	#DIV/0!	#DIV/0!	#DIV/0!	#DIV/0!	#DIV/0!	0
						#DIV/0!		#DIV/0!															#DIV/0!	#DIV/0!	#DIV/0!	#DIV/0!	#DIV/0!	#DIV/0!	#DIV/0!	#DIV/0!	#DIV/0!	#DIV/0!	#DIV/0!	#DIV/0!	#DIV/0!	0	0	0	0	0	0	#DIV/0!	#DIV/0!	#DIV/0!	#DIV/0!	#DIV/0!	#DIV/0!	#DIV/0!	0
						#DIV/0!		#DIV/0!															#DIV/0!	#DIV/0!	#DIV/0!	#DIV/0!	#DIV/0!	#DIV/0!	#DIV/0!	#DIV/0!	#DIV/0!	#DIV/0!	#DIV/0!	#DIV/0!	#DIV/0!	0	0	0	0	0	0	#DIV/0!	#DIV/0!	#DIV/0!	#DIV/0!	#DIV/0!	#DIV/0!	#DIV/0!	0
						#DIV/0!		#DIV/0!															#DIV/0!	#DIV/0!	#DIV/0!	#DIV/0!	#DIV/0!	#DIV/0!	#DIV/0!	#DIV/0!	#DIV/0!	#DIV/0!	#DIV/0!	#DIV/0!	#DIV/0!	0	0	0	0	0	0	#DIV/0!	#DIV/0!	#DIV/0!	#DIV/0!	#DIV/0!	#DIV/0!	#DIV/0!	0
						#DIV/0!		#DIV/0!															#DIV/0!	#DIV/0!	#DIV/0!	#DIV/0!	#DIV/0!	#DIV/0!	#DIV/0!	#DIV/0!	#DIV/0!	#DIV/0!	#DIV/0!	#DIV/0!	#DIV/0!	0	0	0	0	0	0	#DIV/0!	#DIV/0!	#DIV/0!	#DIV/0!	#DIV/0!	#DIV/0!	#DIV/0!	0
						#DIV/0!		#DIV/0!															#DIV/0!	#DIV/0!	#DIV/0!	#DIV/0!	#DIV/0!	#DIV/0!	#DIV/0!	#DIV/0!	#DIV/0!	#DIV/0!	#DIV/0!	#DIV/0!	#DIV/0!	0	0	0	0	0	0	#DIV/0!	#DIV/0!	#DIV/0!	#DIV/0!	#DIV/0!	#DIV/0!	#DIV/0!	0
						#DIV/0!		#DIV/0!															#DIV/0!	#DIV/0!	#DIV/0!	#DIV/0!	#DIV/0!	#DIV/0!	#DIV/0!	#DIV/0!	#DIV/0!	#DIV/0!	#DIV/0!	#DIV/0!	#DIV/0!	0	0	0	0	0	0	#DIV/0!	#DIV/0!	#DIV/0!	#DIV/0!	#DIV/0!	#DIV/0!	#DIV/0!	0
						#DIV/0!		#DIV/0!															#DIV/0!	#DIV/0!	#DIV/0!	#DIV/0!	#DIV/0!	#DIV/0!	#DIV/0!	#DIV/0!	#DIV/0!	#DIV/0!	#DIV/0!	#DIV/0!	#DIV/0!	0	0	0	0	0	0	#DIV/0!	#DIV/0!	#DIV/0!	#DIV/0!	#DIV/0!	#DIV/0!	#DIV/0!	0
						#DIV/0!		#DIV/0!															#DIV/0!	#DIV/0!	#DIV/0!	#DIV/0!	#DIV/0!	#DIV/0!	#DIV/0!	#DIV/0!	#DIV/0!	#DIV/0!	#DIV/0!	#DIV/0!	#DIV/0!	0	0	0	0	0	0	#DIV/0!	#DIV/0!	#DIV/0!	#DIV/0!	#DIV/0!	#DIV/0!	#DIV/0!	0
						#DIV/0!		#DIV/0!															#DIV/0!	#DIV/0!	#DIV/0!	#DIV/0!	#DIV/0!	#DIV/0!	#DIV/0!	#DIV/0!	#DIV/0!	#DIV/0!	#DIV/0!	#DIV/0!	#DIV/0!	0	0	0	0	0	0	#DIV/0!	#DIV/0!	#DIV/0!	#DIV/0!	#DIV/0!	#DIV/0!	#DIV/0!	0
						#DIV/0!		#DIV/0!															#DIV/0!	#DIV/0!	#DIV/0!	#DIV/0!	#DIV/0!	#DIV/0!	#DIV/0!	#DIV/0!	#DIV/0!	#DIV/0!	#DIV/0!	#DIV/0!	#DIV/0!	0	0	0	0	0	0	#DIV/0!	#DIV/0!	#DIV/0!	#DIV/0!	#DIV/0!	#DIV/0!	#DIV/0!	0
						#DIV/0!		#DIV/0!															#DIV/0!	#DIV/0!	#DIV/0!	#DIV/0!	#DIV/0!	#DIV/0!	#DIV/0!	#DIV/0!	#DIV/0!	#DIV/0!	#DIV/0!	#DIV/0!	#DIV/0!	0	0	0	0	0	0	#DIV/0!	#DIV/0!	#DIV/0!	#DIV/0!	#DIV/0!	#DIV/0!	#DIV/0!	0
						#DIV/0!		#DIV/0!															#DIV/0!	#DIV/0!	#DIV/0!	#DIV/0!	#DIV/0!	#DIV/0!	#DIV/0!	#DIV/0!	#DIV/0!	#DIV/0!	#DIV/0!	#DIV/0!	#DIV/0!	0	0	0	0	0	0	#DIV/0!	#DIV/0!	#DIV/0!	#DIV/0!	#DIV/0!	#DIV/0!	#DIV/0!	0
						#DIV/0!		#DIV/0!															#DIV/0!	#DIV/0!	#DIV/0!	#DIV/0!	#DIV/0!	#DIV/0!	#DIV/0!	#DIV/0!	#DIV/0!	#DIV/0!	#DIV/0!	#DIV/0!	#DIV/0!	0	0	0	0	0	0	#DIV/0!	#DIV/0!	#DIV/0!	#DIV/0!	#DIV/0!	#DIV/0!	#DIV/0!	0
						#DIV/0!		#DIV/0!															#DIV/0!	#DIV/0!	#DIV/0!	#DIV/0!	#DIV/0!	#DIV/0!	#DIV/0!	#DIV/0!	#DIV/0!	#DIV/0!	#DIV/0!	#DIV/0!	#DIV/0!	0	0	0	0	0	0	#DIV/0!	#DIV/0!	#DIV/0!	#DIV/0!	#DIV/0!	#DIV/0!	#DIV/0!	0
						#DIV/0!		#DIV/0!															#DIV/0!	#DIV/0!	#DIV/0!	#DIV/0!	#DIV/0!	#DIV/0!	#DIV/0!	#DIV/0!	#DIV/0!	#DIV/0!	#DIV/0!	#DIV/0!	#DIV/0!	0	0	0	0	0	0	#DIV/0!	#DIV/0!	#DIV/0!	#DIV/0!	#DIV/0!	#DIV/0!	#DIV/0!	0
						#DIV/0!		#DIV/0!															#DIV/0!	#DIV/0!	#DIV/0!	#DIV/0!	#DIV/0!	#DIV/0!	#DIV/0!	#DIV/0!	#DIV/0!	#DIV/0!	#DIV/0!	#DIV/0!	#DIV/0!	0	0	0	0	0	0	#DIV/0!	#DIV/0!	#DIV/0!	#DIV/0!	#DIV/0!	#DIV/0!	#DIV/0!	0
						#DIV/0!		#DIV/0!															#DIV/0!	#DIV/0!	#DIV/0!	#DIV/0!	#DIV/0!	#DIV/0!	#DIV/0!	#DIV/0!	#DIV/0!	#DIV/0!	#DIV/0!	#DIV/0!	#DIV/0!	0	0	0	0	0	0	#DIV/0!	#DIV/0!	#DIV/0!	#DIV/0!	#DIV/0!	#DIV/0!	#DIV/0!	0
						#DIV/0!		#DIV/0!															#DIV/0!	#DIV/0!	#DIV/0!	#DIV/0!	#DIV/0!	#DIV/0!	#DIV/0!	#DIV/0!	#DIV/0!	#DIV/0!	#DIV/0!	#DIV/0!	#DIV/0!	0	0	0	0	0	0	#DIV/0!	#DIV/0!	#DIV/0!	#DIV/0!	#DIV/0!	#DIV/0!	#DIV/0!	0
						#DIV/0!		#DIV/0!															#DIV/0!	#DIV/0!	#DIV/0!	#DIV/0!	#DIV/0!	#DIV/0!	#DIV/0!	#DIV/0!	#DIV/0!	#DIV/0!	#DIV/0!	#DIV/0!	#DIV/0!	0	0	0	0	0	0	#DIV/0!	#DIV/0!	#DIV/0!	#DIV/0!	#DIV/0!	#DIV/0!	#DIV/0!	0
						#DIV/0!		#DIV/0!															#DIV/0!	#DIV/0!	#DIV/0!	#DIV/0!	#DIV/0!	#DIV/0!	#DIV/0!	#DIV/0!	#DIV/0!	#DIV/0!	#DIV/0!	#DIV/0!	#DIV/0!	0	0	0	0	0	0	#DIV/0!	#DIV/0!	#DIV/0!	#DIV/0!	#DIV/0!	#DIV/0!	#DIV/0!	0
						#DIV/0!		#DIV/0!															#DIV/0!	#DIV/0!	#DIV/0!	#DIV/0!	#DIV/0!	#DIV/0!	#DIV/0!	#DIV/0!	#DIV/0!	#DIV/0!	#DIV/0!	#DIV/0!	#DIV/0!	0	0	0	0	0	0	#DIV/0!	#DIV/0!	#DIV/0!	#DIV/0!	#DIV/0!	#DIV/0!	#DIV/0!	0
						#DIV/0!		#DIV/0!															#DIV/0!	#DIV/0!	#DIV/0!	#DIV/0!	#DIV/0!	#DIV/0!	#DIV/0!	#DIV/0!	#DIV/0!	#DIV/0!	#DIV/0!	#DIV/0!	#DIV/0!	0	0	0	0	0	0	#DIV/0!	#DIV/0!	#DIV/0!	#DIV/0!	#DIV/0!	#DIV/0!	#DIV/0!	0
						#DIV/0!		#DIV/0!															#DIV/0!	#DIV/0!	#DIV/0!	#DIV/0!	#DIV/0!	#DIV/0!	#DIV/0!	#DIV/0!	#DIV/0!	#DIV/0!	#DIV/0!	#DIV/0!	#DIV/0!	0	0	0	0	0	0	#DIV/0!	#DIV/0!	#DIV/0!	#DIV/0!	#DIV/0!	#DIV/0!	#DIV/0!	0
						#DIV/0!		#DIV/0!															#DIV/0!	#DIV/0!	#DIV/0!	#DIV/0!	#DIV/0!	#DIV/0!	#DIV/0!	#DIV/0!	#DIV/0!	#DIV/0!	#DIV/0!	#DIV/0!	#DIV/0!	0	0	0	0	0	0	#DIV/0!	#DIV/0!	#DIV/0!	#DIV/0!	#DIV/0!	#DIV/0!	#DIV/0!	0
						#DIV/0!		#DIV/0!															#DIV/0!	#DIV/0!	#DIV/0!	#DIV/0!	#DIV/0!	#DIV/0!	#DIV/0!	#DIV/0!	#DIV/0!	#DIV/0!	#DIV/0!	#DIV/0!	#DIV/0!	0	0	0	0	0	0	#DIV/0!	#DIV/0!	#DIV/0!	#DIV/0!	#DIV/0!	#DIV/0!	#DIV/0!	0
						#DIV/0!		#DIV/0!															#DIV/0!	#DIV/0!	#DIV/0!	#DIV/0!	#DIV/0!	#DIV/0!	#DIV/0!	#DIV/0!	#DIV/0!	#DIV/0!	#DIV/0!	#DIV/0!	#DIV/0!	0	0	0	0	0	0	#DIV/0!	#DIV/0!	#DIV/0!	#DIV/0!	#DIV/0!	#DIV/0!	#DIV/0!	0
						#DIV/0!		#DIV/0!															#DIV/0!	#DIV/0!	#DIV/0!	#DIV/0!	#DIV/0!	#DIV/0!	#DIV/0!	#DIV/0!	#DIV/0!	#DIV/0!	#DIV/0!	#DIV/0!	#DIV/0!	0	0	0	0	0	0	#DIV/0!	#DIV/0!	#DIV/0!	#DIV/0!	#DIV/0!	#DIV/0!	#DIV/0!	0
						#DIV/0!		#DIV/0!															#DIV/0!	#DIV/0!	#DIV/0!	#DIV/0!	#DIV/0!	#DIV/0!	#DIV/0!	#DIV/0!	#DIV/0!	#DIV/0!	#DIV/0!	#DIV/0!	#DIV/0!	0	0	0	0	0	0	#DIV/0!	#DIV/0!	#DIV/0!	#DIV/0!	#DIV/0!	#DIV/0!	#DIV/0!	0
						#DIV/0!		#DIV/0!															#DIV/0!	#DIV/0!	#DIV/0!	#DIV/0!	#DIV/0!	#DIV/0!	#DIV/0!	#DIV/0!	#DIV/0!	#DIV/0!	#DIV/0!	#DIV/0!	#DIV/0!	0	0	0	0	0	0	#DIV/0!	#DIV/0!	#DIV/0!	#DIV/0!	#DIV/0!	#DIV/0!	#DIV/0!	0
						#DIV/0!		#DIV/0!															#DIV/0!	#DIV/0!	#DIV/0!	#DIV/0!	#DIV/0!	#DIV/0!	#DIV/0!	#DIV/0!	#DIV/0!	#DIV/0!	#DIV/0!	#DIV/0!	#DIV/0!	0	0	0	0	0	0	#DIV/0!	#DIV/0!	#DIV/0!	#DIV/0!	#DIV/0!	#DIV/0!	#DIV/0!	0
						#DIV/0!		#DIV/0!															#DIV/0!	#DIV/0!	#DIV/0!	#DIV/0!	#DIV/0!	#DIV/0!	#DIV/0!	#DIV/0!	#DIV/0!	#DIV/0!	#DIV/0!	#DIV/0!	#DIV/0!	0	0	0	0	0	0	#DIV/0!	#DIV/0!	#DIV/0!	#DIV/0!	#DIV/0!	#DIV/0!	#DIV/0!	0
						#DIV/0!		#DIV/0!															#DIV/0!	#DIV/0!	#DIV/0!	#DIV/0!	#DIV/0!	#DIV/0!	#DIV/0!	#DIV/0!	#DIV/0!	#DIV/0!	#DIV/0!	#DIV/0!	#DIV/0!	0	0	0	0	0	0	#DIV/0!	#DIV/0!	#DIV/0!	#DIV/0!	#DIV/0!	#DIV/0!	#DIV/0!	0
						#DIV/0!		#DIV/0!															#DIV/0!	#DIV/0!	#DIV/0!	#DIV/0!	#DIV/0!	#DIV/0!	#DIV/0!	#DIV/0!	#DIV/0!	#DIV/0!	#DIV/0!	#DIV/0!	#DIV/0!	0	0	0	0	0	0	#DIV/0!	#DIV/0!	#DIV/0!	#DIV/0!	#DIV/0!	#DIV/0!	#DIV/0!	0
						#DIV/0!		#DIV/0!															#DIV/0!	#DIV/0!	#DIV/0!	#DIV/0!	#DIV/0!	#DIV/0!	#DIV/0!	#DIV/0!	#DIV/0!	#DIV/0!	#DIV/0!	#DIV/0!	#DIV/0!	0	0	0	0	0	0	#DIV/0!	#DIV/0!	#DIV/0!	#DIV/0!	#DIV/0!	#DIV/0!	#DIV/0!	0
						#DIV/0!		#DIV/0!															#DIV/0!	#DIV/0!	#DIV/0!	#DIV/0!	#DIV/0!	#DIV/0!	#DIV/0!	#DIV/0!	#DIV/0!	#DIV/0!	#DIV/0!	#DIV/0!	#DIV/0!	0	0	0	0	0	0	#DIV/0!	#DIV/0!	#DIV/0!	#DIV/0!	#DIV/0!	#DIV/0!	#DIV/0!	0
						#DIV/0!		#DIV/0!															#DIV/0!	#DIV/0!	#DIV/0!	#DIV/0!	#DIV/0!	#DIV/0!	#DIV/0!	#DIV/0!	#DIV/0!	#DIV/0!	#DIV/0!	#DIV/0!	#DIV/0!	0	0	0	0	0	0	#DIV/0!	#DIV/0!	#DIV/0!	#DIV/0!	#DIV/0!	#DIV/0!	#DIV/0!	0
						#DIV/0!		#DIV/0!															#DIV/0!	#DIV/0!	#DIV/0!	#DIV/0!	#DIV/0!	#DIV/0!	#DIV/0!	#DIV/0!	#DIV/0!	#DIV/0!	#DIV/0!	#DIV/0!	#DIV/0!	0	0	0	0	0	0	#DIV/0!	#DIV/0!	#DIV/0!	#DIV/0!	#DIV/0!	#DIV/0!	#DIV/0!	0
						#DIV/0!		#DIV/0!															#DIV/0!	#DIV/0!	#DIV/0!	#DIV/0!	#DIV/0!	#DIV/0!	#DIV/0!	#DIV/0!	#DIV/0!	#DIV/0!	#DIV/0!	#DIV/0!	#DIV/0!	0	0	0	0	0	0	#DIV/0!	#DIV/0!	#DIV/0!	#DIV/0!	#DIV/0!	#DIV/0!	#DIV/0!	0
						#DIV/0!		#DIV/0!															#DIV/0!	#DIV/0!	#DIV/0!	#DIV/0!	#DIV/0!	#DIV/0!	#DIV/0!	#DIV/0!	#DIV/0!	#DIV/0!	#DIV/0!	#DIV/0!	#DIV/0!	0	0	0	0	0	0	#DIV/0!	#DIV/0!	#DIV/0!	#DIV/0!	#DIV/0!	#DIV/0!	#DIV/0!	0
						#DIV/0!		#DIV/0!															#DIV/0!	#DIV/0!	#DIV/0!	#DIV/0!	#DIV/0!	#DIV/0!	#DIV/0!	#DIV/0!	#DIV/0!	#DIV/0!	#DIV/0!	#DIV/0!	#DIV/0!	0	0	0	0	0	0	#DIV/0!	#DIV/0!	#DIV/0!	#DIV/0!	#DIV/0!	#DIV/0!	#DIV/0!	0
						#DIV/0!		#DIV/0!															#DIV/0!	#DIV/0!	#DIV/0!	#DIV/0!	#DIV/0!	#DIV/0!	#DIV/0!	#DIV/0!	#DIV/0!	#DIV/0!	#DIV/0!	#DIV/0!	#DIV/0!	0	0	0	0	0	0	#DIV/0!	#DIV/0!	#DIV/0!	#DIV/0!	#DIV/0!	#DIV/0!	#DIV/0!	0
						#DIV/0!		#DIV/0!															#DIV/0!	#DIV/0!	#DIV/0!	#DIV/0!	#DIV/0!	#DIV/0!	#DIV/0!	#DIV/0!	#DIV/0!	#DIV/0!	#DIV/0!	#DIV/0!	#DIV/0!	0	0	0	0	0	0	#DIV/0!	#DIV/0!	#DIV/0!	#DIV/0!	#DIV/0!	#DIV/0!	#DIV/0!	0
						#DIV/0!		#DIV/0!															#DIV/0!	#DIV/0!	#DIV/0!	#DIV/0!	#DIV/0!	#DIV/0!	#DIV/0!	#DIV/0!	#DIV/0!	#DIV/0!	#DIV/0!	#DIV/0!	#DIV/0!	0	0	0	0	0	0	#DIV/0!	#DIV/0!	#DIV/0!	#DIV/0!	#DIV/0!	#DIV/0!	#DIV/0!	0
						#DIV/0!		#DIV/0!															#DIV/0!	#DIV/0!	#DIV/0!	#DIV/0!	#DIV/0!	#DIV/0!	#DIV/0!	#DIV/0!	#DIV/0!	#DIV/0!	#DIV/0!	#DIV/0!	#DIV/0!	0	0	0	0	0	0	#DIV/0!	#DIV/0!	#DIV/0!	#DIV/0!	#DIV/0!	#DIV/0!	#DIV/0!	0
						#DIV/0!		#DIV/0!															#DIV/0!	#DIV/0!	#DIV/0!	#DIV/0!	#DIV/0!	#DIV/0!	#DIV/0!	#DIV/0!	#DIV/0!	#DIV/0!	#DIV/0!	#DIV/0!	#DIV/0!	0	0	0	0	0	0	#DIV/0!	#DIV/0!	#DIV/0!	#DIV/0!	#DIV/0!	#DIV/0!	#DIV/0!	0
						#DIV/0!		#DIV/0!															#DIV/0!	#DIV/0!	#DIV/0!	#DIV/0!	#DIV/0!	#DIV/0!	#DIV/0!	#DIV/0!	#DIV/0!	#DIV/0!	#DIV/0!	#DIV/0!	#DIV/0!	0	0	0	0	0	0	#DIV/0!	#DIV/0!	#DIV/0!	#DIV/0!	#DIV/0!	#DIV/0!	#DIV/0!	0
						#DIV/0!		#DIV/0!															#DIV/0!	#DIV/0!	#DIV/0!	#DIV/0!	#DIV/0!	#DIV/0!	#DIV/0!	#DIV/0!	#DIV/0!	#DIV/0!	#DIV/0!	#DIV/0!	#DIV/0!	0	0	0	0	0	0	#DIV/0!	#DIV/0!	#DIV/0!	#DIV/0!	#DIV/0!	#DIV/0!	#DIV/0!	0
						#DIV/0!		#DIV/0!															#DIV/0!	#DIV/0!	#DIV/0!	#DIV/0!	#DIV/0!	#DIV/0!	#DIV/0!	#DIV/0!	#DIV/0!	#DIV/0!	#DIV/0!	#DIV/0!	#DIV/0!	0	0	0	0	0	0	#DIV/0!	#DIV/0!	#DIV/0!	#DIV/0!	#DIV/0!	#DIV/0!	#DIV/0!	0
						#DIV/0!		#DIV/0!															#DIV/0!	#DIV/0!	#DIV/0!	#DIV/0!	#DIV/0!	#DIV/0!	#DIV/0!	#DIV/0!	#DIV/0!	#DIV/0!	#DIV/0!	#DIV/0!	#DIV/0!	0	0	0	0	0	0	#DIV/0!	#DIV/0!	#DIV/0!	#DIV/0!	#DIV/0!	#DIV/0!	#DIV/0!	0
						#DIV/0!		#DIV/0!															#DIV/0!	#DIV/0!	#DIV/0!	#DIV/0!	#DIV/0!	#DIV/0!	#DIV/0!	#DIV/0!	#DIV/0!	#DIV/0!	#DIV/0!	#DIV/0!	#DIV/0!	0	0	0	0	0	0	#DIV/0!	#DIV/0!	#DIV/0!	#DIV/0!	#DIV/0!	#DIV/0!	#DIV/0!	0
						#DIV/0!		#DIV/0!															#DIV/0!	#DIV/0!	#DIV/0!	#DIV/0!	#DIV/0!	#DIV/0!	#DIV/0!	#DIV/0!	#DIV/0!	#DIV/0!	#DIV/0!	#DIV/0!	#DIV/0!	0	0	0	0	0	0	#DIV/0!	#DIV/0!	#DIV/0!	#DIV/0!	#DIV/0!	#DIV/0!	#DIV/0!	0
						#DIV/0!		#DIV/0!															#DIV/0!	#DIV/0!	#DIV/0!	#DIV/0!	#DIV/0!	#DIV/0!	#DIV/0!	#DIV/0!	#DIV/0!	#DIV/0!	#DIV/0!	#DIV/0!	#DIV/0!	0	0	0	0	0	0	#DIV/0!	#DIV/0!	#DIV/0!	#DIV/0!	#DIV/0!	#DIV/0!	#DIV/0!	0
						#DIV/0!		#DIV/0!															#DIV/0!	#DIV/0!	#DIV/0!	#DIV/0!	#DIV/0!	#DIV/0!	#DIV/0!	#DIV/0!	#DIV/0!	#DIV/0!	#DIV/0!	#DIV/0!	#DIV/0!	0	0	0	0	0	0	#DIV/0!	#DIV/0!	#DIV/0!	#DIV/0!	#DIV/0!	#DIV/0!	#DIV/0!	0
						#DIV/0!		#DIV/0!															#DIV/0!	#DIV/0!	#DIV/0!	#DIV/0!	#DIV/0!	#DIV/0!	#DIV/0!	#DIV/0!	#DIV/0!	#DIV/0!	#DIV/0!	#DIV/0!	#DIV/0!	0	0	0	0	0	0	#DIV/0!	#DIV/0!	#DIV/0!	#DIV/0!	#DIV/0!	#DIV/0!	#DIV/0!	0
						#DIV/0!		#DIV/0!															#DIV/0!	#DIV/0!	#DIV/0!	#DIV/0!	#DIV/0!	#DIV/0!	#DIV/0!	#DIV/0!	#DIV/0!	#DIV/0!	#DIV/0!	#DIV/0!	#DIV/0!	0	0	0	0	0	0	#DIV/0!	#DIV/0!	#DIV/0!	#DIV/0!	#DIV/0!	#DIV/0!	#DIV/0!	0
						#DIV/0!		#DIV/0!															#DIV/0!	#DIV/0!	#DIV/0!	#DIV/0!	#DIV/0!	#DIV/0!	#DIV/0!	#DIV/0!	#DIV/0!	#DIV/0!	#DIV/0!	#DIV/0!	#DIV/0!	0	0	0	0	0	0	#DIV/0!	#DIV/0!	#DIV/0!	#DIV/0!	#DIV/0!	#DIV/0!	#DIV/0!	0
						#DIV/0!		#DIV/0!															#DIV/0!	#DIV/0!	#DIV/0!	#DIV/0!	#DIV/0!	#DIV/0!	#DIV/0!	#DIV/0!	#DIV/0!	#DIV/0!	#DIV/0!	#DIV/0!	#DIV/0!	0	0	0	0	0	0	#DIV/0!	#DIV/0!	#DIV/0!	#DIV/0!	#DIV/0!	#DIV/0!	#DIV/0!	0
						#DIV/0!		#DIV/0!															#DIV/0!	#DIV/0!	#DIV/0!	#DIV/0!	#DIV/0!	#DIV/0!	#DIV/0!	#DIV/0!	#DIV/0!	#DIV/0!	#DIV/0!	#DIV/0!	#DIV/0!	0	0	0	0	0	0	#DIV/0!	#DIV/0!	#DIV/0!	#DIV/0!	#DIV/0!	#DIV/0!	#DIV/0!	0
						#DIV/0!		#DIV/0!															#DIV/0!	#DIV/0!	#DIV/0!	#DIV/0!	#DIV/0!	#DIV/0!	#DIV/0!	#DIV/0!	#DIV/0!	#DIV/0!	#DIV/0!	#DIV/0!	#DIV/0!	0	0	0	0	0	0	#DIV/0!	#DIV/0!	#DIV/0!	#DIV/0!	#DIV/0!	#DIV/0!	#DIV/0!	0
						#DIV/0!		#DIV/0!															#DIV/0!	#DIV/0!	#DIV/0!	#DIV/0!	#DIV/0!	#DIV/0!	#DIV/0!	#DIV/0!	#DIV/0!	#DIV/0!	#DIV/0!	#DIV/0!	#DIV/0!	0	0	0	0	0	0	#DIV/0!	#DIV/0!	#DIV/0!	#DIV/0!	#DIV/0!	#DIV/0!	#DIV/0!	0
						#DIV/0!		#DIV/0!															#DIV/0!	#DIV/0!	#DIV/0!	#DIV/0!	#DIV/0!	#DIV/0!	#DIV/0!	#DIV/0!	#DIV/0!	#DIV/0!	#DIV/0!	#DIV/0!	#DIV/0!	0	0	0	0	0	0	#DIV/0!	#DIV/0!	#DIV/0!	#DIV/0!	#DIV/0!	#DIV/0!	#DIV/0!	0
						#DIV/0!		#DIV/0!															#DIV/0!	#DIV/0!	#DIV/0!	#DIV/0!	#DIV/0!	#DIV/0!	#DIV/0!	#DIV/0!	#DIV/0!	#DIV/0!	#DIV/0!	#DIV/0!	#DIV/0!	0	0	0	0	0	0	#DIV/0!	#DIV/0!	#DIV/0!	#DIV/0!	#DIV/0!	#DIV/0!	#DIV/0!	0
						#DIV/0!		#DIV/0!															#DIV/0!	#DIV/0!	#DIV/0!	#DIV/0!	#DIV/0!	#DIV/0!	#DIV/0!	#DIV/0!	#DIV/0!	#DIV/0!	#DIV/0!	#DIV/0!	#DIV/0!	0	0	0	0	0	0	#DIV/0!	#DIV/0!	#DIV/0!	#DIV/0!	#DIV/0!	#DIV/0!	#DIV/0!	0
						#DIV/0!		#DIV/0!															#DIV/0!	#DIV/0!	#DIV/0!	#DIV/0!	#DIV/0!	#DIV/0!	#DIV/0!	#DIV/0!	#DIV/0!	#DIV/0!	#DIV/0!	#DIV/0!	#DIV/0!	0	0	0	0	0	0	#DIV/0!	#DIV/0!	#DIV/0!	#DIV/0!	#DIV/0!	#DIV/0!	#DIV/0!	0
						#DIV/0!		#DIV/0!															#DIV/0!	#DIV/0!	#DIV/0!	#DIV/0!	#DIV/0!	#DIV/0!	#DIV/0!	#DIV/0!	#DIV/0!	#DIV/0!	#DIV/0!	#DIV/0!	#DIV/0!	0	0	0	0	0	0	#DIV/0!	#DIV/0!	#DIV/0!	#DIV/0!	#DIV/0!	#DIV/0!	#DIV/0!	0
						#DIV/0!		#DIV/0!															#DIV/0!	#DIV/0!	#DIV/0!	#DIV/0!	#DIV/0!	#DIV/0!	#DIV/0!	#DIV/0!	#DIV/0!	#DIV/0!	#DIV/0!	#DIV/0!	#DIV/0!	0	0	0	0	0	0	#DIV/0!	#DIV/0!	#DIV/0!	#DIV/0!	#DIV/0!	#DIV/0!	#DIV/0!	0
						#DIV/0!		#DIV/0!															#DIV/0!	#DIV/0!	#DIV/0!	#DIV/0!	#DIV/0!	#DIV/0!	#DIV/0!	#DIV/0!	#DIV/0!	#DIV/0!	#DIV/0!	#DIV/0!	#DIV/0!	0	0	0	0	0	0	#DIV/0!	#DIV/0!	#DIV/0!	#DIV/0!	#DIV/0!	#DIV/0!	#DIV/0!	0
						#DIV/0!		#DIV/0!															#DIV/0!	#DIV/0!	#DIV/0!	#DIV/0!	#DIV/0!	#DIV/0!	#DIV/0!	#DIV/0!	#DIV/0!	#DIV/0!	#DIV/0!	#DIV/0!	#DIV/0!	0	0	0	0	0	0	#DIV/0!	#DIV/0!	#DIV/0!	#DIV/0!	#DIV/0!	#DIV/0!	#DIV/0!	0
						#DIV/0!		#DIV/0!															#DIV/0!	#DIV/0!	#DIV/0!	#DIV/0!	#DIV/0!	#DIV/0!	#DIV/0!	#DIV/0!	#DIV/0!	#DIV/0!	#DIV/0!	#DIV/0!	#DIV/0!	0	0	0	0	0	0	#DIV/0!	#DIV/0!	#DIV/0!	#DIV/0!	#DIV/0!	#DIV/0!	#DIV/0!	0
						#DIV/0!		#DIV/0!															#DIV/0!	#DIV/0!	#DIV/0!	#DIV/0!	#DIV/0!	#DIV/0!	#DIV/0!	#DIV/0!	#DIV/0!	#DIV/0!	#DIV/0!	#DIV/0!	#DIV/0!	0	0	0	0	0	0	#DIV/0!	#DIV/0!	#DIV/0!	#DIV/0!	#DIV/0!	#DIV/0!	#DIV/0!	0
						#DIV/0!		#DIV/0!															#DIV/0!	#DIV/0!	#DIV/0!	#DIV/0!	#DIV/0!	#DIV/0!	#DIV/0!	#DIV/0!	#DIV/0!	#DIV/0!	#DIV/0!	#DIV/0!	#DIV/0!	0	0	0	0	0	0	#DIV/0!	#DIV/0!	#DIV/0!	#DIV/0!	#DIV/0!	#DIV/0!	#DIV/0!	0
						#DIV/0!		#DIV/0!															#DIV/0!	#DIV/0!	#DIV/0!	#DIV/0!	#DIV/0!	#DIV/0!	#DIV/0!	#DIV/0!	#DIV/0!	#DIV/0!	#DIV/0!	#DIV/0!	#DIV/0!	0	0	0	0	0	0	#DIV/0!	#DIV/0!	#DIV/0!	#DIV/0!	#DIV/0!	#DIV/0!	#DIV/0!	0
						#DIV/0!		#DIV/0!															#DIV/0!	#DIV/0!	#DIV/0!	#DIV/0!	#DIV/0!	#DIV/0!	#DIV/0!	#DIV/0!	#DIV/0!	#DIV/0!	#DIV/0!	#DIV/0!	#DIV/0!	0	0	0	0	0	0	#DIV/0!	#DIV/0!	#DIV/0!	#DIV/0!	#DIV/0!	#DIV/0!	#DIV/0!	0
						#DIV/0!		#DIV/0!															#DIV/0!	#DIV/0!	#DIV/0!	#DIV/0!	#DIV/0!	#DIV/0!	#DIV/0!	#DIV/0!	#DIV/0!	#DIV/0!	#DIV/0!	#DIV/0!	#DIV/0!	0	0	0	0	0	0	#DIV/0!	#DIV/0!	#DIV/0!	#DIV/0!	#DIV/0!	#DIV/0!	#DIV/0!	0
						#DIV/0!		#DIV/0!															#DIV/0!	#DIV/0!	#DIV/0!	#DIV/0!	#DIV/0!	#DIV/0!	#DIV/0!	#DIV/0!	#DIV/0!	#DIV/0!	#DIV/0!	#DIV/0!	#DIV/0!	0	0	0	0	0	0	#DIV/0!	#DIV/0!	#DIV/0!	#DIV/0!	#DIV/0!	#DIV/0!	#DIV/0!	0
						#DIV/0!		#DIV/0!															#DIV/0!	#DIV/0!	#DIV/0!	#DIV/0!	#DIV/0!	#DIV/0!	#DIV/0!	#DIV/0!	#DIV/0!	#DIV/0!	#DIV/0!	#DIV/0!	#DIV/0!	0	0	0	0	0	0	#DIV/0!	#DIV/0!	#DIV/0!	#DIV/0!	#DIV/0!	#DIV/0!	#DIV/0!	0
						#DIV/0!		#DIV/0!															#DIV/0!	#DIV/0!	#DIV/0!	#DIV/0!	#DIV/0!	#DIV/0!	#DIV/0!	#DIV/0!	#DIV/0!	#DIV/0!	#DIV/0!	#DIV/0!	#DIV/0!	0	0	0	0	0	0	#DIV/0!	#DIV/0!	#DIV/0!	#DIV/0!	#DIV/0!	#DIV/0!	#DIV/0!	0
						#DIV/0!		#DIV/0!															#DIV/0!	#DIV/0!	#DIV/0!	#DIV/0!	#DIV/0!	#DIV/0!	#DIV/0!	#DIV/0!	#DIV/0!	#DIV/0!	#DIV/0!	#DIV/0!	#DIV/0!	0	0	0	0	0	0	#DIV/0!	#DIV/0!	#DIV/0!	#DIV/0!	#DIV/0!	#DIV/0!	#DIV/0!	0
						#DIV/0!		#DIV/0!															#DIV/0!	#DIV/0!	#DIV/0!	#DIV/0!	#DIV/0!	#DIV/0!	#DIV/0!	#DIV/0!	#DIV/0!	#DIV/0!	#DIV/0!	#DIV/0!	#DIV/0!	0	0	0	0	0	0	#DIV/0!	#DIV/0!	#DIV/0!	#DIV/0!	#DIV/0!	#DIV/0!	#DIV/0!	0
						#DIV/0!		#DIV/0!															#DIV/0!	#DIV/0!	#DIV/0!	#DIV/0!	#DIV/0!	#DIV/0!	#DIV/0!	#DIV/0!	#DIV/0!	#DIV/0!	#DIV/0!	#DIV/0!	#DIV/0!	0	0	0	0	0	0	#DIV/0!	#DIV/0!	#DIV/0!	#DIV/0!	#DIV/0!	#DIV/0!	#DIV/0!	0
						#DIV/0!		#DIV/0!															#DIV/0!	#DIV/0!	#DIV/0!	#DIV/0!	#DIV/0!	#DIV/0!	#DIV/0!	#DIV/0!	#DIV/0!	#DIV/0!	#DIV/0!	#DIV/0!	#DIV/0!	0	0	0	0	0	0	#DIV/0!	#DIV/0!	#DIV/0!	#DIV/0!	#DIV/0!	#DIV/0!	#DIV/0!	0
						#DIV/0!		#DIV/0!															#DIV/0!	#DIV/0!	#DIV/0!	#DIV/0!	#DIV/0!	#DIV/0!	#DIV/0!	#DIV/0!	#DIV/0!	#DIV/0!	#DIV/0!	#DIV/0!	#DIV/0!	0	0	0	0	0	0	#DIV/0!	#DIV/0!	#DIV/0!	#DIV/0!	#DIV/0!	#DIV/0!	#DIV/0!	0
						#DIV/0!		#DIV/0!															#DIV/0!	#DIV/0!	#DIV/0!	#DIV/0!	#DIV/0!	#DIV/0!	#DIV/0!	#DIV/0!	#DIV/0!	#DIV/0!	#DIV/0!	#DIV/0!	#DIV/0!	0	0	0	0	0	0	#DIV/0!	#DIV/0!	#DIV/0!	#DIV/0!	#DIV/0!	#DIV/0!	#DIV/0!	0
						#DIV/0!		#DIV/0!															#DIV/0!	#DIV/0!	#DIV/0!	#DIV/0!	#DIV/0!	#DIV/0!	#DIV/0!	#DIV/0!	#DIV/0!	#DIV/0!	#DIV/0!	#DIV/0!	#DIV/0!	0	0	0	0	0	0	#DIV/0!	#DIV/0!	#DIV/0!	#DIV/0!	#DIV/0!	#DIV/0!	#DIV/0!	0
						#DIV/0!		#DIV/0!															#DIV/0!	#DIV/0!	#DIV/0!	#DIV/0!	#DIV/0!	#DIV/0!	#DIV/0!	#DIV/0!	#DIV/0!	#DIV/0!	#DIV/0!	#DIV/0!	#DIV/0!	0	0	0	0	0	0	#DIV/0!	#DIV/0!	#DIV/0!	#DIV/0!	#DIV/0!	#DIV/0!	#DIV/0!	0
						#DIV/0!		#DIV/0!															#DIV/0!	#DIV/0!	#DIV/0!	#DIV/0!	#DIV/0!	#DIV/0!	#DIV/0!	#DIV/0!	#DIV/0!	#DIV/0!	#DIV/0!	#DIV/0!	#DIV/0!	0	0	0	0	0	0	#DIV/0!	#DIV/0!	#DIV/0!	#DIV/0!	#DIV/0!	#DIV/0!	#DIV/0!	0
						#DIV/0!		#DIV/0!															#DIV/0!	#DIV/0!	#DIV/0!	#DIV/0!	#DIV/0!	#DIV/0!	#DIV/0!	#DIV/0!	#DIV/0!	#DIV/0!	#DIV/0!	#DIV/0!	#DIV/0!	0	0	0	0	0	0	#DIV/0!	#DIV/0!	#DIV/0!	#DIV/0!	#DIV/0!	#DIV/0!	#DIV/0!	0
						#DIV/0!		#DIV/0!															#DIV/0!	#DIV/0!	#DIV/0!	#DIV/0!	#DIV/0!	#DIV/0!	#DIV/0!	#DIV/0!	#DIV/0!	#DIV/0!	#DIV/0!	#DIV/0!	#DIV/0!	0	0	0	0	0	0	#DIV/0!	#DIV/0!	#DIV/0!	#DIV/0!	#DIV/0!	#DIV/0!	#DIV/0!	0
						#DIV/0!		#DIV/0!															#DIV/0!	#DIV/0!	#DIV/0!	#DIV/0!	#DIV/0!	#DIV/0!	#DIV/0!	#DIV/0!	#DIV/0!	#DIV/0!	#DIV/0!	#DIV/0!	#DIV/0!	0	0	0	0	0	0	#DIV/0!	#DIV/0!	#DIV/0!	#DIV/0!	#DIV/0!	#DIV/0!	#DIV/0!	0
						#DIV/0!		#DIV/0!															#DIV/0!	#DIV/0!	#DIV/0!	#DIV/0!	#DIV/0!	#DIV/0!	#DIV/0!	#DIV/0!	#DIV/0!	#DIV/0!	#DIV/0!	#DIV/0!	#DIV/0!	0	0	0	0	0	0	#DIV/0!	#DIV/0!	#DIV/0!	#DIV/0!	#DIV/0!	#DIV/0!	#DIV/0!	0
						#DIV/0!		#DIV/0!															#DIV/0!	#DIV/0!	#DIV/0!	#DIV/0!	#DIV/0!	#DIV/0!	#DIV/0!	#DIV/0!	#DIV/0!	#DIV/0!	#DIV/0!	#DIV/0!	#DIV/0!	0	0	0	0	0	0	#DIV/0!	#DIV/0!	#DIV/0!	#DIV/0!	#DIV/0!	#DIV/0!	#DIV/0!	0
						#DIV/0!		#DIV/0!															#DIV/0!	#DIV/0!	#DIV/0!	#DIV/0!	#DIV/0!	#DIV/0!	#DIV/0!	#DIV/0!	#DIV/0!	#DIV/0!	#DIV/0!	#DIV/0!	#DIV/0!	0	0	0	0	0	0	#DIV/0!	#DIV/0!	#DIV/0!	#DIV/0!	#DIV/0!	#DIV/0!	#DIV/0!	0
						#DIV/0!		#DIV/0!															#DIV/0!	#DIV/0!	#DIV/0!	#DIV/0!	#DIV/0!	#DIV/0!	#DIV/0!	#DIV/0!	#DIV/0!	#DIV/0!	#DIV/0!	#DIV/0!	#DIV/0!	0	0	0	0	0	0	#DIV/0!	#DIV/0!	#DIV/0!	#DIV/0!	#DIV/0!	#DIV/0!	#DIV/0!	0
						#DIV/0!		#DIV/0!															#DIV/0!	#DIV/0!	#DIV/0!	#DIV/0!	#DIV/0!	#DIV/0!	#DIV/0!	#DIV/0!	#DIV/0!	#DIV/0!	#DIV/0!	#DIV/0!	#DIV/0!	0	0	0	0	0	0	#DIV/0!	#DIV/0!	#DIV/0!	#DIV/0!	#DIV/0!	#DIV/0!	#DIV/0!	0
						#DIV/0!		#DIV/0!															#DIV/0!	#DIV/0!	#DIV/0!	#DIV/0!	#DIV/0!	#DIV/0!	#DIV/0!	#DIV/0!	#DIV/0!	#DIV/0!	#DIV/0!	#DIV/0!	#DIV/0!	0	0	0	0	0	0	#DIV/0!	#DIV/0!	#DIV/0!	#DIV/0!	#DIV/0!	#DIV/0!	#DIV/0!	0
						#DIV/0!		#DIV/0!															#DIV/0!	#DIV/0!	#DIV/0!	#DIV/0!	#DIV/0!	#DIV/0!	#DIV/0!	#DIV/0!	#DIV/0!	#DIV/0!	#DIV/0!	#DIV/0!	#DIV/0!	0	0	0	0	0	0	#DIV/0!	#DIV/0!	#DIV/0!	#DIV/0!	#DIV/0!	#DIV/0!	#DIV/0!	0
						#DIV/0!		#DIV/0!															#DIV/0!	#DIV/0!	#DIV/0!	#DIV/0!	#DIV/0!	#DIV/0!	#DIV/0!	#DIV/0!	#DIV/0!	#DIV/0!	#DIV/0!	#DIV/0!	#DIV/0!	0	0	0	0	0	0	#DIV/0!	#DIV/0!	#DIV/0!	#DIV/0!	#DIV/0!	#DIV/0!	#DIV/0!	0
						#DIV/0!		#DIV/0!															#DIV/0!	#DIV/0!	#DIV/0!	#DIV/0!	#DIV/0!	#DIV/0!	#DIV/0!	#DIV/0!	#DIV/0!	#DIV/0!	#DIV/0!	#DIV/0!	#DIV/0!	0	0	0	0	0	0	#DIV/0!	#DIV/0!	#DIV/0!	#DIV/0!	#DIV/0!	#DIV/0!	#DIV/0!	0
						#DIV/0!		#DIV/0!															#DIV/0!	#DIV/0!	#DIV/0!	#DIV/0!	#DIV/0!	#DIV/0!	#DIV/0!	#DIV/0!	#DIV/0!	#DIV/0!	#DIV/0!	#DIV/0!	#DIV/0!	0	0	0	0	0	0	#DIV/0!	#DIV/0!	#DIV/0!	#DIV/0!	#DIV/0!	#DIV/0!	#DIV/0!	0
						#DIV/0!		#DIV/0!															#DIV/0!	#DIV/0!	#DIV/0!	#DIV/0!	#DIV/0!	#DIV/0!	#DIV/0!	#DIV/0!	#DIV/0!	#DIV/0!	#DIV/0!	#DIV/0!	#DIV/0!	0	0	0	0	0	0	#DIV/0!	#DIV/0!	#DIV/0!	#DIV/0!	#DIV/0!	#DIV/0!	#DIV/0!	0
						#DIV/0!		#DIV/0!															#DIV/0!	#DIV/0!	#DIV/0!	#DIV/0!	#DIV/0!	#DIV/0!	#DIV/0!	#DIV/0!	#DIV/0!	#DIV/0!	#DIV/0!	#DIV/0!	#DIV/0!	0	0	0	0	0	0	#DIV/0!	#DIV/0!	#DIV/0!	#DIV/0!	#DIV/0!	#DIV/0!	#DIV/0!	0
						#DIV/0!		#DIV/0!															#DIV/0!	#DIV/0!	#DIV/0!	#DIV/0!	#DIV/0!	#DIV/0!	#DIV/0!	#DIV/0!	#DIV/0!	#DIV/0!	#DIV/0!	#DIV/0!	#DIV/0!	0	0	0	0	0	0	#DIV/0!	#DIV/0!	#DIV/0!	#DIV/0!	#DIV/0!	#DIV/0!	#DIV/0!	0
						#DIV/0!		#DIV/0!															#DIV/0!	#DIV/0!	#DIV/0!	#DIV/0!	#DIV/0!	#DIV/0!	#DIV/0!	#DIV/0!	#DIV/0!	#DIV/0!	#DIV/0!	#DIV/0!	#DIV/0!	0	0	0	0	0	0	#DIV/0!	#DIV/0!	#DIV/0!	#DIV/0!	#DIV/0!	#DIV/0!	#DIV/0!	0
						#DIV/0!		#DIV/0!															#DIV/0!	#DIV/0!	#DIV/0!	#DIV/0!	#DIV/0!	#DIV/0!	#DIV/0!	#DIV/0!	#DIV/0!	#DIV/0!	#DIV/0!	#DIV/0!	#DIV/0!	0	0	0	0	0	0	#DIV/0!	#DIV/0!	#DIV/0!	#DIV/0!	#DIV/0!	#DIV/0!	#DIV/0!	0
						#DIV/0!		#DIV/0!															#DIV/0!	#DIV/0!	#DIV/0!	#DIV/0!	#DIV/0!	#DIV/0!	#DIV/0!	#DIV/0!	#DIV/0!	#DIV/0!	#DIV/0!	#DIV/0!	#DIV/0!	0	0	0	0	0	0	#DIV/0!	#DIV/0!	#DIV/0!	#DIV/0!	#DIV/0!	#DIV/0!	#DIV/0!	0
						#DIV/0!		#DIV/0!															#DIV/0!	#DIV/0!	#DIV/0!	#DIV/0!	#DIV/0!	#DIV/0!	#DIV/0!	#DIV/0!	#DIV/0!	#DIV/0!	#DIV/0!	#DIV/0!	#DIV/0!	0	0	0	0	0	0	#DIV/0!	#DIV/0!	#DIV/0!	#DIV/0!	#DIV/0!	#DIV/0!	#DIV/0!	0
						#DIV/0!		#DIV/0!															#DIV/0!	#DIV/0!	#DIV/0!	#DIV/0!	#DIV/0!	#DIV/0!	#DIV/0!	#DIV/0!	#DIV/0!	#DIV/0!	#DIV/0!	#DIV/0!	#DIV/0!	0	0	0	0	0	0	#DIV/0!	#DIV/0!	#DIV/0!	#DIV/0!	#DIV/0!	#DIV/0!	#DIV/0!	0
						#DIV/0!		#DIV/0!															#DIV/0!	#DIV/0!	#DIV/0!	#DIV/0!	#DIV/0!	#DIV/0!	#DIV/0!	#DIV/0!	#DIV/0!	#DIV/0!	#DIV/0!	#DIV/0!	#DIV/0!	0	0	0	0	0	0	#DIV/0!	#DIV/0!	#DIV/0!	#DIV/0!	#DIV/0!	#DIV/0!	#DIV/0!	0
						#DIV/0!		#DIV/0!															#DIV/0!	#DIV/0!	#DIV/0!	#DIV/0!	#DIV/0!	#DIV/0!	#DIV/0!	#DIV/0!	#DIV/0!	#DIV/0!	#DIV/0!	#DIV/0!	#DIV/0!	0	0	0	0	0	0	#DIV/0!	#DIV/0!	#DIV/0!	#DIV/0!	#DIV/0!	#DIV/0!	#DIV/0!	0
						#DIV/0!		#DIV/0!															#DIV/0!	#DIV/0!	#DIV/0!	#DIV/0!	#DIV/0!	#DIV/0!	#DIV/0!	#DIV/0!	#DIV/0!	#DIV/0!	#DIV/0!	#DIV/0!	#DIV/0!	0	0	0	0	0	0	#DIV/0!	#DIV/0!	#DIV/0!	#DIV/0!	#DIV/0!	#DIV/0!	#DIV/0!	0
						#DIV/0!		#DIV/0!															#DIV/0!	#DIV/0!	#DIV/0!	#DIV/0!	#DIV/0!	#DIV/0!	#DIV/0!	#DIV/0!	#DIV/0!	#DIV/0!	#DIV/0!	#DIV/0!	#DIV/0!	0	0	0	0	0	0	#DIV/0!	#DIV/0!	#DIV/0!	#DIV/0!	#DIV/0!	#DIV/0!	#DIV/0!	0
						#DIV/0!		#DIV/0!															#DIV/0!	#DIV/0!	#DIV/0!	#DIV/0!	#DIV/0!	#DIV/0!	#DIV/0!	#DIV/0!	#DIV/0!	#DIV/0!	#DIV/0!	#DIV/0!	#DIV/0!	0	0	0	0	0	0	#DIV/0!	#DIV/0!	#DIV/0!	#DIV/0!	#DIV/0!	#DIV/0!	#DIV/0!	0
						#DIV/0!		#DIV/0!															#DIV/0!	#DIV/0!	#DIV/0!	#DIV/0!	#DIV/0!	#DIV/0!	#DIV/0!	#DIV/0!	#DIV/0!	#DIV/0!	#DIV/0!	#DIV/0!	#DIV/0!	0	0	0	0	0	0	#DIV/0!	#DIV/0!	#DIV/0!	#DIV/0!	#DIV/0!	#DIV/0!	#DIV/0!	0
						#DIV/0!		#DIV/0!															#DIV/0!	#DIV/0!	#DIV/0!	#DIV/0!	#DIV/0!	#DIV/0!	#DIV/0!	#DIV/0!	#DIV/0!	#DIV/0!	#DIV/0!	#DIV/0!	#DIV/0!	0	0	0	0	0	0	#DIV/0!	#DIV/0!	#DIV/0!	#DIV/0!	#DIV/0!	#DIV/0!	#DIV/0!	0
						#DIV/0!		#DIV/0!															#DIV/0!	#DIV/0!	#DIV/0!	#DIV/0!	#DIV/0!	#DIV/0!	#DIV/0!	#DIV/0!	#DIV/0!	#DIV/0!	#DIV/0!	#DIV/0!	#DIV/0!	0	0	0	0	0	0	#DIV/0!	#DIV/0!	#DIV/0!	#DIV/0!	#DIV/0!	#DIV/0!	#DIV/0!	0
						#DIV/0!		#DIV/0!
						#DIV/0!		#DIV/0!
						#DIV/0!		#DIV/0!
						#DIV/0!		#DIV/0!
						#DIV/0!		#DIV/0!
						#DIV/0!		#DIV/0!
						#DIV/0!		#DIV/0!
						#DIV/0!		#DIV/0!
						#DIV/0!		#DIV/0!
						#DIV/0!		#DIV/0!
						#DIV/0!		#DIV/0!
						#DIV/0!		#DIV/0!
						#DIV/0!		#DIV/0!
						#DIV/0!		#DIV/0!
						#DIV/0!		#DIV/0!
[truncated: 33 more columns]

## Sheet: Site2
Date:	14/9/00
Site No. :	2V23
			Width (m)	Length (m)	Area (ha)
	Transect Dimensions:		10	50	0.05
	Co-ordinates:			X	Y
			NW Corner
			SW Corner
			NE Corner
			SE Corner
									OED		OUD	NED		NUD	NFD	OFD	OBE	OBU	NBE	NBU	RE	Notes	Canopy volume (m3)																				Damage
Trans. No.	Sp. Code	Coppice	Height (m)	D1 (m)	D2 (m)	R	Shape	Adj. shape	Score	Eaten		Score	Eaten										Total	0.5	1	2	3	4	5	0.5	1	2	3	4	5	OED	OUD	NED	NUD	NFD	OFD	Old Rec. Vol.	OED	OUD	NED	NUD	NFD	OFD	Sp. Code
1	Gre mon	T	2.1	2.4	2	1.1	3	3			1												2.65827	1.48256	2.27622	2.65798	2.86752	4.62707	9.65886	1.48256	2.27622	2.65798	2.65827	2.65827	2.65827	0	5.5	0	0	0	0	2.81298	0	15.4714	0	0	0	0	Gre mon
1	Gre bic	T	2.5	1.5	1.6	0.775	3	3															1.57086	0.76658	1.23155	1.55829	1.58343	1.91017	3.14172	0.76658	1.23155	1.55829	1.57086	1.57086	1.57086	0	0	0	0	0	0	1.57086	0	0	0	0	0	0	Gre bic
1	Gre bic	T	0.5	0.5	0.3	0.2	1	1															0.0628319	0.0628319	0.125664	0.251327	0.376991	0.502655	0.628319	0.0628319	0.0628319	0.0628319	0.0628319	0.0628319	0.0628319	0	0	0	0	0	0	0.0628319	0	0	0	0	0	0	Gre bic
1	Gre mon	T	1.7	1.8	1.5	0.825	3	3															1.21046	0.784718	1.12595	1.21711	1.75176	4.20816	10.0646	0.784718	1.12595	1.21046	1.21046	1.21046	1.21046	0	0	0	0	0	0	1.21046	0	0	0	0	0	0	Gre mon
1	Ere amo	T	1.4	0.6	0.9	0.375	1	1														Browsed	0.618501	0.220893	0.441786	0.883573	1.32536	1.76715	2.20893	0.220893	0.441786	0.618501	0.618501	0.618501	0.618501	0	0	0	0	0	0	0.618501	0	0	0	0	0	0	Ere amo
1	Gre bic	T	1.8	1.4	1.2	0.65	3	3															0.795597	0.495884	0.725751	0.796689	1.03133	2.24819	5.26578	0.495884	0.725751	0.795597	0.795597	0.795597	0.795597	0	0	0	0	0	0	0.795597	0	0	0	0	0	0	Gre bic
1	Dic cin	T	0.3	0.2	0.2	0.1	1	1														Browsed	0.00942478	0.015708	0.0314159	0.0628319	0.0942478	0.125664	0.15708	0.00942478	0.00942478	0.00942478	0.00942478	0.00942478	0.00942478	0	0	0	0	0	0	0.00942478	0	0	0	0	0	0	Dic cin
1	Dic cin	T	0.3	0.3	0.2	0.125	1	1															0.0147262	0.0245437	0.0490874	0.0981748	0.147262	0.19635	0.245437	0.0147262	0.0147262	0.0147262	0.0147262	0.0147262	0.0147262	0	0	0	0	0	0	0.0147262	0	0	0	0	0	0	Dic cin
1	Gre mon	T	0.7	0.8	0.6	0.35	3	3															0.0897074	0.0876151	0.0967689	0.664305	3.27184	9.48858	20.8838	0.0876151	0.0897074	0.0897074	0.0897074	0.0897074	0.0897074	0	0	0	0	0	0	0.0897074	0	0	0	0	0	0	Gre mon
1	Thy afr	T	1.8	0.8	1	0.45	3	3			1												0.381322	0.237672	0.347845	0.381845	0.494306	1.07753	2.52384	0.237672	0.347845	0.381322	0.381322	0.381322	0.381322	0	5.5	0	0	0	0	0.403515	0	2.21933	0	0	0	0	Thy afr
1	Dic cin	T	0.2	0.7	0.2	0.225	1	1															0.0318086	0.0795216	0.159043	0.318086	0.477129	0.636173	0.795216	0.0318086	0.0318086	0.0318086	0.0318086	0.0318086	0.0318086	0	0	0	0	0	0	0.0318086	0	0	0	0	0	0	Dic cin
1	Gre mon	T	1.1	1.3	1.1	0.6	3	3															0.414276	0.347045	0.413964	0.641178	2.54915	8.00538	18.8774	0.347045	0.413964	0.414276	0.414276	0.414276	0.414276	0	0	0	0	0	0	0.414276	0	0	0	0	0	0	Gre mon
1	Gre mon	T	1.8	1.9	1.6	0.875	3	3															1.44173	0.898607	1.31515	1.4437	1.8689	4.07401	9.54229	0.898607	1.31515	1.44173	1.44173	1.44173	1.44173	0	0	0	0	0	0	1.44173	0	0	0	0	0	0	Gre mon
1	Mae jun	T	0.1	0.1	0.1	0.05	1	1															0.000785398	0.00392699	0.00785398	0.015708	0.0235619	0.0314159	0.0392699	0.000785398	0.000785398	0.000785398	0.000785398	0.000785398	0.000785398	0	0	0	0	0	0	0.000785398	0	0	0	0	0	0	Mae jun
1	Gre mon	T	2	1.6	1.2	0.7	3	3															1.02523	0.59271	0.897074	1.02523	1.15338	2.05045	4.48537	0.59271	0.897074	1.02523	1.02523	1.02523	1.02523	0	0	0	0	0	0	1.02523	0	0	0	0	0	0	Gre mon
1	Gre mon	T	0.9	0.7	0.7	0.35	3	3															0.115338	0.105212	0.115496	0.325921	1.58056	4.82869	11.0196	0.105212	0.115338	0.115338	0.115338	0.115338	0.115338	0	0	0	0	0	0	0.115338	0	0	0	0	0	0	Gre mon
1	Gre mon	T	2.4	2.7	2.1	1.2	7	7	1		2												9.04417	2.26195	4.52389	8.50854	7.46239	-4.88219	-34.8021	2.26195	4.52389	8.50854	9.04417	9.04417	9.04417	5.5	18	0	0	0	0	11.8224	65.0234	212.804	0	0	0	0	Gre mon
1	Dic cin	T	0.7	0.4	0.7	0.275	1	1															0.166308	0.118791	0.237583	0.475166	0.712749	0.950332	1.18791	0.118791	0.166308	0.166308	0.166308	0.166308	0.166308	0	0	0	0	0	0	0.166308	0	0	0	0	0	0	Dic cin
1	Gre bic	T	2.1	2.4	1.2	0.9	3	3			1												1.7795	0.992455	1.52375	1.77931	1.91958	3.09746	6.46585	0.992455	1.52375	1.77931	1.7795	1.7795	1.7795	0	5.5	0	0	0	0	1.88307	0	10.3569	0	0	0	0	Gre bic
1	Gre mon	T	1.4	0.7	0.9	0.4	3	3															0.234338	0.172081	0.228872	0.252784	0.584136	1.73533	4.21876	0.172081	0.228872	0.234338	0.234338	0.234338	0.234338	0	0	0	0	0	0	0.234338	0	0	0	0	0	0	Gre mon
1	Gre mon	T	1.7	1	1.2	0.55	3	3															0.537983	0.348764	0.500424	0.540939	0.778558	1.87029	4.47315	0.348764	0.500424	0.537983	0.537983	0.537983	0.537983	0	0	0	0	0	0	0.537983	0	0	0	0	0	0	Gre mon
1	Gre mon	T	2.4	1.5	1.6	0.775	3	3															1.50803	0.759795	1.20869	1.50104	1.53159	1.95485	3.42535	0.759795	1.20869	1.50104	1.50803	1.50803	1.50803	0	0	0	0	0	0	1.50803	0	0	0	0	0	0	Gre mon
1	Gre mon	T	2.1	1.3	1.3	0.65	3	3															0.928197	0.517669	0.794796	0.928097	1.00126	1.61565	3.37262	0.517669	0.794796	0.928097	0.928197	0.928197	0.928197	0	0	0	0	0	0	0.928197	0	0	0	0	0	0	Gre mon
1	Gre mon	T	2.3	1.5	1.7	0.8	3	3															1.53993	0.801798	1.26187	1.53652	1.58335	2.16175	4.03114	0.801798	1.26187	1.53652	1.53993	1.53993	1.53993	0	0	0	0	0	0	1.53993	0	0	0	0	0	0	Gre mon
1	Gre mon	T	2.3	1.3	0.8	0.525	3	3															0.663194	0.345306	0.543441	0.661722	0.68189	0.93099	1.73607	0.345306	0.543441	0.661722	0.663194	0.663194	0.663194	0	0	0	0	0	0	0.663194	0	0	0	0	0	0	Gre mon
1	Gre mon	T	2.3	1.5	1.3	0.7	3	3			1												1.17901	0.613877	0.966117	1.1764	1.21225	1.65509	3.08634	0.613877	0.966117	1.1764	1.17901	1.17901	1.17901	0	5.5	0	0	0	0	1.24763	0	6.86197	0	0	0	0	Gre mon
1	Gre mon	T	2.2	2	1.4	0.85	3	3			1												1.66286	0.895612	1.393	1.66161	1.74281	2.57362	5.09101	0.895612	1.393	1.66161	1.66286	1.66286	1.66286	0	5.5	0	0	0	0	1.75964	0	9.678	0	0	0	0	Gre mon
1	Gre mon	T	1.4	1.1	0.7	0.45	3	3															0.296584	0.21779	0.289666	0.31993	0.739297	2.19628	5.33937	0.21779	0.289666	0.296584	0.296584	0.296584	0.296584	0	0	0	0	0	0	0.296584	0	0	0	0	0	0	Gre mon
1	Aca tor	T	0.2	0.3	0.1	0.1	1	1															0.00628319	0.015708	0.0314159	0.0628319	0.0942478	0.125664	0.15708	0.00628319	0.00628319	0.00628319	0.00628319	0.00628319	0.00628319	0	0	0	0	0	0	0.00628319	0	0	0	0	0	0	Aca tor
1	Gre mon	T	1.3	1	0.6	0.4	3	3															0.217599	0.166889	0.214925	0.251571	0.704202	2.16708	5.23447	0.166889	0.214925	0.217599	0.217599	0.217599	0.217599	0	0	0	0	0	0	0.217599	0	0	0	0	0	0	Gre mon
1	Gre mon	T	2	0.7	0.6	0.325	3	3															0.220999	0.127765	0.193374	0.220999	0.248624	0.441999	0.966872	0.127765	0.193374	0.220999	0.220999	0.220999	0.220999	0	0	0	0	0	0	0.220999	0	0	0	0	0	0	Gre mon
1	Gre mon	T	0.9	0.7	0.8	0.375	3	3															0.132403	0.12078	0.132585	0.374144	1.81442	5.54314	12.6501	0.12078	0.132403	0.132403	0.132403	0.132403	0.132403	0	0	0	0	0	0	0.132403	0	0	0	0	0	0	Gre mon
1	Gre mon	T	1.5	0.8	0.7	0.375	3	3															0.220672	0.155288	0.212499	0.228845	0.441345	1.2423	3.02403	0.155288	0.212499	0.220672	0.220672	0.220672	0.220672	0	0	0	0	0	0	0.220672	0	0	0	0	0	0	Gre mon
1	Gre mon	T	1.6	1.4	0.8	0.55	3	3															0.506337	0.341802	0.479635	0.514248	0.845543	2.21522	5.36499	0.341802	0.479635	0.506337	0.506337	0.506337	0.506337	0	0	0	0	0	0	0.506337	0	0	0	0	0	0	Gre mon
1	Gre mon	T	1.3	1.3	1	0.575	3	3															0.449648	0.34486	0.444123	0.519849	1.45517	4.47807	10.8165	0.34486	0.444123	0.449648	0.449648	0.449648	0.449648	0	0	0	0	0	0	0.449648	0	0	0	0	0	0	Gre mon
1	Gre mon	T	1.5	0.9	0.9	0.45	3	3															0.317768	0.223615	0.305999	0.329537	0.635536	1.78892	4.3546	0.223615	0.305999	0.317768	0.317768	0.317768	0.317768	0	0	0	0	0	0	0.317768	0	0	0	0	0	0	Gre mon
1	Gre bic	T	0.4	0.4	0.2	0.15	3	3															0.00941535	0.00956247	0.0411922	0.611998	2.59511	6.87321	14.329	0.00941535	0.00941535	0.00941535	0.00941535	0.00941535	0.00941535	0	0	0	0	0	0	0.00941535	0	0	0	0	0	0	Gre bic
1	Gre mon	T	2.9	1.7	1.5	0.8	3	3															1.94166	0.8411	1.3956	1.88362	1.94173	2.04762	2.67894	0.8411	1.3956	1.88362	1.94166	1.94166	1.94166	0	0	0	0	0	0	1.94166	0	0	0	0	0	0	Gre mon
1	Cad ter	T	0.5	0.6	0.3	0.225	1	1														Browsed	0.0795216	0.0795216	0.159043	0.318086	0.477129	0.636173	0.795216	0.0795216	0.0795216	0.0795216	0.0795216	0.0795216	0.0795216	0	0	0	0	0	0	0.0795216	0	0	0	0	0	0	Cad ter
1	Ter pru	T	0.5	0.3	0.3	0.15	1	1														Browsed	0.0353429	0.0353429	0.0706858	0.141372	0.212058	0.282743	0.353429	0.0353429	0.0353429	0.0353429	0.0353429	0.0353429	0.0353429	0	0	0	0	0	0	0.0353429	0	0	0	0	0	0	Ter pru
1	Gre bic	T	2.5	0.4	0.3	0.175	3	3															0.0800959	0.0390868	0.0627952	0.0794551	0.0807367	0.0973966	0.160192	0.0390868	0.0627952	0.0794551	0.0800959	0.0800959	0.0800959	0	0	0	0	0	0	0.0800959	0	0	0	0	0	0	Gre bic
1	Gre bic	T	2.6	3	2.2	1.3	3	3															4.59678	2.17469	3.52553	4.54029	4.61352	5.31444	8.21228	2.17469	3.52553	4.54029	4.59678	4.59678	4.59678	0	0	0	0	0	0	4.59678	0	0	0	0	0	0	Gre bic
1	Gre bic	T	2.7	2	2.2	1.05	3	3															3.11413	1.42946	2.33682	3.05986	3.1184	3.46172	5.03912	1.42946	2.33682	3.05986	3.11413	3.11413	3.11413	0	0	0	0	0	0	3.11413	0	0	0	0	0	0	Gre bic
1	Gre mon	T	1.9	1.6	1.4	0.75	3	3															1.11807	0.670779	0.99924	1.11824	1.33504	2.62769	5.97425	0.670779	0.99924	1.11807	1.11807	1.11807	1.11807	0	0	0	0	0	0	1.11807	0	0	0	0	0	0	Gre mon
1	Gre bic	T	2.2	1.7	1.7	0.85	3	3			1												1.66286	0.895612	1.393	1.66161	1.74281	2.57362	5.09101	0.895612	1.393	1.66161	1.66286	1.66286	1.66286	0	5.5	0	0	0	0	1.75964	0	9.678	0	0	0	0	Gre bic
1	Dic cin	T	0.5	0.3	0.3	0.15	1	1															0.0353429	0.0353429	0.0706858	0.141372	0.212058	0.282743	0.353429	0.0353429	0.0353429	0.0353429	0.0353429	0.0353429	0.0353429	0	0	0	0	0	0	0.0353429	0	0	0	0	0	0	Dic cin
1	Gre mon	T	2	1	1.3	0.575	3	3															0.691767	0.399928	0.605296	0.691767	0.778238	1.38353	3.02648	0.399928	0.605296	0.691767	0.691767	0.691767	0.691767	0	0	0	0	0	0	0.691767	0	0	0	0	0	0	Gre mon
1	Gre mon	T	2.3	1.7	2.1	3	3	3															21.6553	11.2753	17.745	21.6073	22.2658	30.3997	56.6879	11.2753	17.745	21.6073	21.6553	21.6553	21.6553	0	0	0	0	0	0	21.6553	0	0	0	0	0	0	Gre mon
1	Gre mon	T	1.4	1	1	0.5	3	3															0.366153	0.268877	0.357613	0.394975	0.912713	2.71145	6.59181	0.268877	0.357613	0.366153	0.366153	0.366153	0.366153	0	0	0	0	0	0	0.366153	0	0	0	0	0	0	Gre mon
1	Gre bic	T	2.7	2.6	3.2	1.45	1	1															17.834	3.3026	6.6052	13.2104	19.8156	26.4208	33.026	3.3026	6.6052	13.2104	17.834	17.834	17.834	0	0	0	0	0	0	17.834	0	0	0	0	0	0	Gre bic
1	Gre mon	T	0.7	0.3	0.2	0.125	1	1															0.0343612	0.0245437	0.0490874	0.0981748	0.147262	0.19635	0.245437	0.0245437	0.0343612	0.0343612	0.0343612	0.0343612	0.0343612	0	0	0	0	0	0	0.0343612	0	0	0	0	0	0	Gre mon
1	Gre mon	T	2.2	2.6	2.1	1.175	3	3			1							1					3.17755	1.71143	2.66189	3.17516	3.33034	4.91792	9.72841	1.71143	2.66189	3.17516	3.17755	3.17755	3.17755	0	5.5	0	0	0	0	3.36249	0	18.4937	0	0	0	0	Gre mon
1	Gre bic	T	2.4	2.1	1.8	0.975	3	3															2.38679	1.20255	1.91302	2.37574	2.42409	3.09399	5.42139	1.20255	1.91302	2.37574	2.38679	2.38679	2.38679	0	0	0	0	0	0	2.38679	0	0	0	0	0	0	Gre bic
1	Gre bic	T	1.7	1.7	1.7	0.85	3	3			1												1.28493	0.832997	1.19523	1.292	1.85953	4.46706	10.6838	0.832997	1.19523	1.28493	1.28493	1.28493	1.28493	0	5.5	0	0	0	0	1.35972	0	7.47845	0	0	0	0	Gre bic
1	Gre mon	T	2.3	2.5	2.3	1.2	7	7			1												8.59178	2.26195	4.52389	8.28107	6.38754	-7.43211	-39.4548	2.26195	4.52389	8.28107	8.59178	8.59178	8.59178	0	5.5	0	0	0	0	9.09183	0	50.0051	0	0	0	0	Gre mon
1	Aca tor	T	0.4	0.6	0.3	0.225	1	1															0.0636173	0.0795216	0.159043	0.318086	0.477129	0.636173	0.795216	0.0636173	0.0636173	0.0636173	0.0636173	0.0636173	0.0636173	0	0	0	0	0	0	0.0636173	0	0	0	0	0	0	Aca tor
1	Cap sep	T	0.4	4	3.5	1.875	1	1														Browsed	4.41786	5.52233	11.0447	22.0893	33.134	44.1786	55.2233	4.41786	4.41786	4.41786	4.41786	4.41786	4.41786	0	0	0	0	0	0	4.41786	0	0	0	0	0	0	Cap sep
1	Aca tor	T	0.1	0.1	0.1	0.05	1	1															0.000785398	0.00392699	0.00785398	0.015708	0.0235619	0.0314159	0.0392699	0.000785398	0.000785398	0.000785398	0.000785398	0.000785398	0.000785398	0	0	0	0	0	0	0.000785398	0	0	0	0	0	0	Aca tor
1	Aca tor	T	0.2	0.2	0.1	0.075	1	1															0.00353429	0.00883573	0.0176715	0.0353429	0.0530144	0.0706858	0.0883573	0.00353429	0.00353429	0.00353429	0.00353429	0.00353429	0.00353429	0	0	0	0	0	0	0.00353429	0	0	0	0	0	0	Aca tor
1	Aca tor	T	0.3	0.5	0.4	0.225	1	1															0.0477129	0.0795216	0.159043	0.318086	0.477129	0.636173	0.795216	0.0477129	0.0477129	0.0477129	0.0477129	0.0477129	0.0477129	0	0	0	0	0	0	0.0477129	0	0	0	0	0	0	Aca tor
1	Gre mon	T	2.7	3	2.2	1.3	1	1															14.3351	2.65465	5.30929	10.6186	15.9279	21.2372	26.5465	2.65465	5.30929	10.6186	14.3351	14.3351	14.3351	0	0	0	0	0	0	14.3351	0	0	0	0	0	0	Gre mon
1	Gre ina	T	1.3	0.6	0.6	0.3	2	2														Browsed	0.1224	0.00696402	0.0557121	0.445697	1.50423	3.56558	6.96402	0.00696402	0.0557121	0.1224	0.1224	0.1224	0.1224	0	0	0	0	0	0	0.1224	0	0	0	0	0	0	Gre ina
1	Gre mon	T	0.6	0.4	0.5	0.225	1	1															0.0954259	0.0795216	0.159043	0.318086	0.477129	0.636173	0.795216	0.0795216	0.0954259	0.0954259	0.0954259	0.0954259	0.0954259	0	0	0	0	0	0	0.0954259	0	0	0	0	0	0	Gre mon
1	Gre bic	T	0.5	0.5	0.2	0.175	3	3															0.0160192	0.0160192	0.0320384	0.448537	2.01842	5.5106	11.694	0.0160192	0.0160192	0.0160192	0.0160192	0.0160192	0.0160192	0	0	0	0	0	0	0.0160192	0	0	0	0	0	0	Gre bic
1	Gre bic	T	2.1	1.5	1.2	0.675	3	3															1.00097	0.558256	0.857109	1.00086	1.07976	1.74232	3.63704	0.558256	0.857109	1.00086	1.00097	1.00097	1.00097	0	0	0	0	0	0	1.00097	0	0	0	0	0	0	Gre bic
1	Gre mon	T	2.7	1.6	2.2	0.95	3	3			1												2.54921	1.17015	1.91291	2.50478	2.5527	2.83375	4.12499	1.17015	1.91291	2.50478	2.54921	2.54921	2.54921	0	5.5	0	0	0	0	2.69757	0	14.8367	0	0	0	0	Gre mon
1	Gre mon	T	1.7	1.4	1	0.6	3	3															0.640244	0.415057	0.595546	0.643763	0.926549	2.2258	5.32342	0.415057	0.595546	0.640244	0.640244	0.640244	0.640244	0	0	0	0	0	0	0.640244	0	0	0	0	0	0	Gre mon
1	Gre bic	T	0.7	1.2	0.5	0.425	1	1															0.397215	0.283725	0.56745	1.1349	1.70235	2.2698	2.83725	0.283725	0.397215	0.397215	0.397215	0.397215	0.397215	0	0	0	0	0	0	0.397215	0	0	0	0	0	0	Gre bic
1	Aca tor	T	0.3	0.7	0.5	0.3	1	1														Browsed	0.084823	0.141372	0.282743	0.565487	0.84823	1.13097	1.41372	0.084823	0.084823	0.084823	0.084823	0.084823	0.084823	0	0	0	0	0	0	0.084823	0	0	0	0	0	0	Aca tor
1	Gre ina	T	0.9	1.2	0.7	0.475	2	2														Browsed	0.212434	0.0364256	0.291405	2.33124	7.86792	18.6499	36.4256	0.0364256	0.212434	0.212434	0.212434	0.212434	0.212434	0	0	0	0	0	0	0.212434	0	0	0	0	0	0	Gre ina
1	Aca tor	T	0.2	0.1	0.1	0.05	1	1															0.0015708	0.00392699	0.00785398	0.015708	0.0235619	0.0314159	0.0392699	0.0015708	0.0015708	0.0015708	0.0015708	0.0015708	0.0015708	0	0	0	0	0	0	0.0015708	0	0	0	0	0	0	Aca tor
1	Dic cin	T	0.9	0.8	0.5	0.325	1	1															0.298648	0.165915	0.331831	0.663661	0.995492	1.32732	1.65915	0.165915	0.298648	0.298648	0.298648	0.298648	0.298648	0	0	0	0	0	0	0.298648	0	0	0	0	0	0	Dic cin
1	Cap sep	T	0.3	0.2	0.2	0.1	1	1															0.00942478	0.015708	0.0314159	0.0628319	0.0942478	0.125664	0.15708	0.00942478	0.00942478	0.00942478	0.00942478	0.00942478	0.00942478	0	0	0	0	0	0	0.00942478	0	0	0	0	0	0	Cap sep
1	Mae par	T	0.1	0.3	0.3	0.15	1	1														Browsed	0.00706858	0.0353429	0.0706858	0.141372	0.212058	0.282743	0.353429	0.00706858	0.00706858	0.00706858	0.00706858	0.00706858	0.00706858	0	0	0	0	0	0	0.00706858	0	0	0	0	0	0	Mae par
1	Aca tor	T	0.2	0.4	0.3	0.175	1	1															0.0192423	0.0481056	0.0962113	0.192423	0.288634	0.384845	0.481056	0.0192423	0.0192423	0.0192423	0.0192423	0.0192423	0.0192423	0	0	0	0	0	0	0.0192423	0	0	0	0	0	0	Aca tor
1	Aca tor	T	0.2	0.4	0.4	0.2	1	1															0.0251327	0.0628319	0.125664	0.251327	0.376991	0.502655	0.628319	0.0251327	0.0251327	0.0251327	0.0251327	0.0251327	0.0251327	0	0	0	0	0	0	0.0251327	0	0	0	0	0	0	Aca tor
1	Gre ina	T	1.1	1	0.8	0.45	1	1														Browsed	0.69979	0.318086	0.636173	1.27235	1.90852	2.54469	3.18086	0.318086	0.636173	0.69979	0.69979	0.69979	0.69979	0	0	0	0	0	0	0.69979	0	0	0	0	0	0	Gre ina
1	Gre mon	T	2.5	2.1	2.3	1.1	3	3															3.1646	1.54433	2.48105	3.13929	3.18992	3.84816	6.32921	1.54433	2.48105	3.13929	3.1646	3.1646	3.1646	0	0	0	0	0	0	3.1646	0	0	0	0	0	0	Gre mon
1	Gre mon	T	2.5	1.4	2.3	0.925	3	3															2.23778	1.09204	1.75442	2.21988	2.25568	2.72114	4.47556	1.09204	1.75442	2.21988	2.23778	2.23778	2.23778	0	0	0	0	0	0	2.23778	0	0	0	0	0	0	Gre mon
1	Gre mon	T	2.3	2.1	1.7	0.95	3	3			1												2.17155	1.13066	1.77943	2.16673	2.23276	3.04841	5.68454	1.13066	1.77943	2.16673	2.17155	2.17155	2.17155	0	5.5	0	0	0	0	2.29793	0	12.6386	0	0	0	0	Gre mon
1	Gre bic	T	2.9	2.2	2.2	1.1	3	3															3.67094	1.5902	2.63855	3.56122	3.67109	3.87128	5.06487	1.5902	2.63855	3.56122	3.67094	3.67094	3.67094	0	0	0	0	0	0	3.67094	0	0	0	0	0	0	Gre bic
1	Gre mon	T	2.2	1.7	2	0.925	3	3				2											1.96925	1.06063	1.64967	1.96777	2.06394	3.04782	6.02906	1.06063	1.64967	1.96777	1.96925	1.96925	1.96925	0	0	18	0	0	0	1.96925	0	0	43.2274	0	0	0	Gre mon
1	Gre mon	T	1.4	1	0.8	0.45	3	3															0.296584	0.21779	0.289666	0.31993	0.739297	2.19628	5.33937	0.21779	0.289666	0.296584	0.296584	0.296584	0.296584	0	0	0	0	0	0	0.296584	0	0	0	0	0	0	Gre mon
1	Mae par	T	0.1	0.1	0.1	0.05	1	1														Browsed	0.000785398	0.00392699	0.00785398	0.015708	0.0235619	0.0314159	0.0392699	0.000785398	0.000785398	0.000785398	0.000785398	0.000785398	0.000785398	0	0	0	0	0	0	0.000785398	0	0	0	0	0	0	Mae par
1	Mae par	T	0.5	0.4	0.1	0.125	1	1														Browsed	0.0245437	0.0245437	0.0490874	0.0981748	0.147262	0.19635	0.245437	0.0245437	0.0245437	0.0245437	0.0245437	0.0245437	0.0245437	0	0	0	0	0	0	0.0245437	0	0	0	0	0	0	Mae par
1	Aca tor	T	0.3	0.2	0.1	0.075	1	1															0.00530144	0.00883573	0.0176715	0.0353429	0.0530144	0.0706858	0.0883573	0.00530144	0.00530144	0.00530144	0.00530144	0.00530144	0.00530144	0	0	0	0	0	0	0.00530144	0	0	0	0	0	0	Aca tor
1	Gre mon	T	0.2	0.3	0.2	0.125	1	1															0.00981748	0.0245437	0.0490874	0.0981748	0.147262	0.19635	0.245437	0.00981748	0.00981748	0.00981748	0.00981748	0.00981748	0.00981748	0	0	0	0	0	0	0.00981748	0	0	0	0	0	0	Gre mon
1	Dic cin	T	0.7	0.6	0.4	0.25	1	1															0.137445	0.0981748	0.19635	0.392699	0.589049	0.785398	0.981748	0.0981748	0.137445	0.137445	0.137445	0.137445	0.137445	0	0	0	0	0	0	0.137445	0	0	0	0	0	0	Dic cin
1	Gre bic	T	1.7	1.5	2	0.875	1	1															4.08898	1.20264	2.40528	4.81056	7.21585	9.62113	12.0264	1.20264	2.40528	4.08898	4.08898	4.08898	4.08898	0	0	0	0	0	0	4.08898	0	0	0	0	0	0	Gre bic
1	Mae par	T	0.2	0.2	0.1	0.075	1	1															0.00353429	0.00883573	0.0176715	0.0353429	0.0530144	0.0706858	0.0883573	0.00353429	0.00353429	0.00353429	0.00353429	0.00353429	0.00353429	0	0	0	0	0	0	0.00353429	0	0	0	0	0	0	Mae par
1	Mae par	T	0.5	0.4	0.3	0.175	1	1														Browsed	0.0481056	0.0481056	0.0962113	0.192423	0.288634	0.384845	0.481056	0.0481056	0.0481056	0.0481056	0.0481056	0.0481056	0.0481056	0	0	0	0	0	0	0.0481056	0	0	0	0	0	0	Mae par
1	Mae par	T	0.8	0.5	0.4	0.225	1	1														Browsed	0.127235	0.0795216	0.159043	0.318086	0.477129	0.636173	0.795216	0.0795216	0.127235	0.127235	0.127235	0.127235	0.127235	0	0	0	0	0	0	0.127235	0	0	0	0	0	0	Mae par
1	Gre mon	T	0.5	0.2	0.2	0.1	1	1															0.015708	0.015708	0.0314159	0.0628319	0.0942478	0.125664	0.15708	0.015708	0.015708	0.015708	0.015708	0.015708	0.015708	0	0	0	0	0	0	0.015708	0	0	0	0	0	0	Gre mon
1	Mae par	T	0.5	0.6	0.3	0.225	1	1														Browsed	0.0795216	0.0795216	0.159043	0.318086	0.477129	0.636173	0.795216	0.0795216	0.0795216	0.0795216	0.0795216	0.0795216	0.0795216	0	0	0	0	0	0	0.0795216	0	0	0	0	0	0	Mae par
1	Mae par	T	0.6	0.6	0.8	0.35	1	1														Browsed	0.230907	0.192423	0.384845	0.76969	1.15454	1.53938	1.92423	0.192423	0.230907	0.230907	0.230907	0.230907	0.230907	0	0	0	0	0	0	0.230907	0	0	0	0	0	0	Mae par
1	Mae par	T	0.6	0.3	0.2	0.125	1	1														Browsed	0.0294524	0.0245437	0.0490874	0.0981748	0.147262	0.19635	0.245437	0.0245437	0.0294524	0.0294524	0.0294524	0.0294524	0.0294524	0	0	0	0	0	0	0.0294524	0	0	0	0	0	0	Mae par
1	Gre bic	T	0.9	0.5	0.6	0.275	1	1															0.213825	0.118791	0.237583	0.475166	0.712749	0.950332	1.18791	0.118791	0.213825	0.213825	0.213825	0.213825	0.213825	0	0	0	0	0	0	0.213825	0	0	0	0	0	0	Gre bic
1	Mae par	T	0.3	0.4	0.3	0.175	1	1															0.0288634	0.0481056	0.0962113	0.192423	0.288634	0.384845	0.481056	0.0288634	0.0288634	0.0288634	0.0288634	0.0288634	0.0288634	0	0	0	0	0	0	0.0288634	0	0	0	0	0	0	Mae par
1	Mae par	T	0.1	0.1	0.1	0.05	1	1															0.000785398	0.00392699	0.00785398	0.015708	0.0235619	0.0314159	0.0392699	0.000785398	0.000785398	0.000785398	0.000785398	0.000785398	0.000785398	0	0	0	0	0	0	0.000785398	0	0	0	0	0	0	Mae par
1	Gre bic	T	1.2	1.2	1.2	0.6	3	3															0.451937	0.36223	0.449845	0.585844	1.97722	6.19321	14.803	0.36223	0.449845	0.451937	0.451937	0.451937	0.451937	0	0	0	0	0	0	0.451937	0	0	0	0	0	0	Gre bic
1	Gre bic	T	1.1	1.1	0.9	0.5	3	3			1												0.287691	0.241004	0.287475	0.445262	1.77024	5.55929	13.1093	0.241004	0.287475	0.287691	0.287691	0.287691	0.287691	0	5.5	0	0	0	0	0.304435	0	1.67439	0	0	0	0	Gre bic
1	Dic cin	T	0.6	0.4	0.5	0.225	1	1															0.0954259	0.0795216	0.159043	0.318086	0.477129	0.636173	0.795216	0.0795216	0.0954259	0.0954259	0.0954259	0.0954259	0.0954259	0	0	0	0	0	0	0.0954259	0	0	0	0	0	0	Dic cin
1	Gre bic	T	1.6	1.1	2.2	0.825	3	3			1												1.13926	0.769055	1.07918	1.15706	1.90247	4.98425	12.0712	0.769055	1.07918	1.13926	1.13926	1.13926	1.13926	0	5.5	0	0	0	0	1.20556	0	6.6306	0	0	0	0	Gre bic
1	Gre fla	T	2	1.6	1.4	0.75	3	3	1													Browsed	1.17692	0.680406	1.0298	1.17692	1.32403	2.35384	5.14902	0.680406	1.0298	1.17692	1.17692	1.17692	1.17692	5.5	0	0	0	0	0	1.24542	6.84979	0	0	0	0	0	Gre fla
1	Com mos	T	0.3	0.3	0.2	0.125	1	1														Browsed	0.0147262	0.0245437	0.0490874	0.0981748	0.147262	0.19635	0.245437	0.0147262	0.0147262	0.0147262	0.0147262	0.0147262	0.0147262	0	0	0	0	0	0	0.0147262	0	0	0	0	0	0	Com mos
1	Mae par	T	0.5	0.3	0.2	0.125	1	1														Browsed	0.0245437	0.0245437	0.0490874	0.0981748	0.147262	0.19635	0.245437	0.0245437	0.0245437	0.0245437	0.0245437	0.0245437	0.0245437	0	0	0	0	0	0	0.0245437	0	0	0	0	0	0	Mae par
1	Dic cin	T	0.4	0.6	0.4	0.25	1	1														Browsed	0.0785398	0.0981748	0.19635	0.392699	0.589049	0.785398	0.981748	0.0785398	0.0785398	0.0785398	0.0785398	0.0785398	0.0785398	0	0	0	0	0	0	0.0785398	0	0	0	0	0	0	Dic cin
1	Gre bic	T	1.5	2.7	2.5	1.3	3	3															2.65199	1.86622	2.55377	2.75021	5.30398	14.9297	36.3421	1.86622	2.55377	2.65199	2.65199	2.65199	2.65199	0	0	0	0	0	0	2.65199	0	0	0	0	0	0	Gre bic
1	All aln	T	0.7	0.3	0.4	0.175	3	3														Browsed	0.0224268	0.0219038	0.0241922	0.166076	0.817959	2.37215	5.22094	0.0219038	0.0224268	0.0224268	0.0224268	0.0224268	0.0224268	0	0	0	0	0	0	0.0224268	0	0	0	0	0	0	All aln
1	Gre fla	T	2.3	2.7	2	1.175	3	3														Browsed	3.32199	1.72966	2.72213	3.31461	3.41564	4.66339	8.69608	1.72966	2.72213	3.31461	3.32199	3.32199	3.32199	0	0	0	0	0	0	3.32199	0	0	0	0	0	0	Gre fla
1	Dic cin	T	1.4	0.5	0.6	0.275	1	1														Browsed	0.332616	0.118791	0.237583	0.475166	0.712749	0.950332	1.18791	0.118791	0.237583	0.332616	0.332616	0.332616	0.332616	0	0	0	0	0	0	0.332616	0	0	0	0	0	0	Dic cin
1	Mae par	T	0.5	0.7	0.1	0.2	1	1															0.0628319	0.0628319	0.125664	0.251327	0.376991	0.502655	0.628319	0.0628319	0.0628319	0.0628319	0.0628319	0.0628319	0.0628319	0	0	0	0	0	0	0.0628319	0	0	0	0	0	0	Mae par
1	Gre bic	T	1.1	0.9	0.7	0.4	3	3														Browsed	0.184122	0.154242	0.183984	0.284968	1.13295	3.55795	8.38995	0.154242	0.183984	0.184122	0.184122	0.184122	0.184122	0	0	0	0	0	0	0.184122	0	0	0	0	0	0	Gre bic
1	Mae par	T	0.2	0.3	0.1	0.1	1	1															0.00628319	0.015708	0.0314159	0.0628319	0.0942478	0.125664	0.15708	0.00628319	0.00628319	0.00628319	0.00628319	0.00628319	0.00628319	0	0	0	0	0	0	0.00628319	0	0	0	0	0	0	Mae par
1	Aca tor	T	1	2.4	1.5	0.975	1	1			1												2.98648	1.49324	2.98648	5.97295	8.95943	11.9459	14.9324	1.49324	2.98648	2.98648	2.98648	2.98648	2.98648	0	5.5	0	0	0	0	3.16029	0	17.3816	0	0	0	0	Aca tor
1	Mae par	T	0.3	0.3	0.1	0.1	1	1															0.00942478	0.015708	0.0314159	0.0628319	0.0942478	0.125664	0.15708	0.00942478	0.00942478	0.00942478	0.00942478	0.00942478	0.00942478	0	0	0	0	0	0	0.00942478	0	0	0	0	0	0	Mae par
1	Mae par	T	0.2	0.4	0.2	0.15	1	1														Browsed	0.0141372	0.0353429	0.0706858	0.141372	0.212058	0.282743	0.353429	0.0141372	0.0141372	0.0141372	0.0141372	0.0141372	0.0141372	0	0	0	0	0	0	0.0141372	0	0	0	0	0	0	Mae par
1	Com mos	T	0.3	0.2	0.1	0.075	1	1														Browsed	0.00530144	0.00883573	0.0176715	0.0353429	0.0530144	0.0706858	0.0883573	0.00530144	0.00530144	0.00530144	0.00530144	0.00530144	0.00530144	0	0	0	0	0	0	0.00530144	0	0	0	0	0	0	Com mos
						#DIV/0!		#DIV/0!															#DIV/0!	#DIV/0!	#DIV/0!	#DIV/0!	#DIV/0!	#DIV/0!	#DIV/0!	#DIV/0!	#DIV/0!	#DIV/0!	#DIV/0!	#DIV/0!	#DIV/0!	0	0	0	0	0	0	#DIV/0!	#DIV/0!	#DIV/0!	#DIV/0!	#DIV/0!	#DIV/0!	#DIV/0!	0
						#DIV/0!		#DIV/0!															#DIV/0!	#DIV/0!	#DIV/0!	#DIV/0!	#DIV/0!	#DIV/0!	#DIV/0!	#DIV/0!	#DIV/0!	#DIV/0!	#DIV/0!	#DIV/0!	#DIV/0!	0	0	0	0	0	0	#DIV/0!	#DIV/0!	#DIV/0!	#DIV/0!	#DIV/0!	#DIV/0!	#DIV/0!	0
						#DIV/0!		#DIV/0!															#DIV/0!	#DIV/0!	#DIV/0!	#DIV/0!	#DIV/0!	#DIV/0!	#DIV/0!	#DIV/0!	#DIV/0!	#DIV/0!	#DIV/0!	#DIV/0!	#DIV/0!	0	0	0	0	0	0	#DIV/0!	#DIV/0!	#DIV/0!	#DIV/0!	#DIV/0!	#DIV/0!	#DIV/0!	0
						#DIV/0!		#DIV/0!															#DIV/0!	#DIV/0!	#DIV/0!	#DIV/0!	#DIV/0!	#DIV/0!	#DIV/0!	#DIV/0!	#DIV/0!	#DIV/0!	#DIV/0!	#DIV/0!	#DIV/0!	0	0	0	0	0	0	#DIV/0!	#DIV/0!	#DIV/0!	#DIV/0!	#DIV/0!	#DIV/0!	#DIV/0!	0
						#DIV/0!		#DIV/0!															#DIV/0!	#DIV/0!	#DIV/0!	#DIV/0!	#DIV/0!	#DIV/0!	#DIV/0!	#DIV/0!	#DIV/0!	#DIV/0!	#DIV/0!	#DIV/0!	#DIV/0!	0	0	0	0	0	0	#DIV/0!	#DIV/0!	#DIV/0!	#DIV/0!	#DIV/0!	#DIV/0!	#DIV/0!	0
						#DIV/0!		#DIV/0!															#DIV/0!	#DIV/0!	#DIV/0!	#DIV/0!	#DIV/0!	#DIV/0!	#DIV/0!	#DIV/0!	#DIV/0!	#DIV/0!	#DIV/0!	#DIV/0!	#DIV/0!	0	0	0	0	0	0	#DIV/0!	#DIV/0!	#DIV/0!	#DIV/0!	#DIV/0!	#DIV/0!	#DIV/0!	0
						#DIV/0!		#DIV/0!															#DIV/0!	#DIV/0!	#DIV/0!	#DIV/0!	#DIV/0!	#DIV/0!	#DIV/0!	#DIV/0!	#DIV/0!	#DIV/0!	#DIV/0!	#DIV/0!	#DIV/0!	0	0	0	0	0	0	#DIV/0!	#DIV/0!	#DIV/0!	#DIV/0!	#DIV/0!	#DIV/0!	#DIV/0!	0
						#DIV/0!		#DIV/0!															#DIV/0!	#DIV/0!	#DIV/0!	#DIV/0!	#DIV/0!	#DIV/0!	#DIV/0!	#DIV/0!	#DIV/0!	#DIV/0!	#DIV/0!	#DIV/0!	#DIV/0!	0	0	0	0	0	0	#DIV/0!	#DIV/0!	#DIV/0!	#DIV/0!	#DIV/0!	#DIV/0!	#DIV/0!	0
						#DIV/0!		#DIV/0!															#DIV/0!	#DIV/0!	#DIV/0!	#DIV/0!	#DIV/0!	#DIV/0!	#DIV/0!	#DIV/0!	#DIV/0!	#DIV/0!	#DIV/0!	#DIV/0!	#DIV/0!	0	0	0	0	0	0	#DIV/0!	#DIV/0!	#DIV/0!	#DIV/0!	#DIV/0!	#DIV/0!	#DIV/0!	0
						#DIV/0!		#DIV/0!															#DIV/0!	#DIV/0!	#DIV/0!	#DIV/0!	#DIV/0!	#DIV/0!	#DIV/0!	#DIV/0!	#DIV/0!	#DIV/0!	#DIV/0!	#DIV/0!	#DIV/0!	0	0	0	0	0	0	#DIV/0!	#DIV/0!	#DIV/0!	#DIV/0!	#DIV/0!	#DIV/0!	#DIV/0!	0
						#DIV/0!		#DIV/0!															#DIV/0!	#DIV/0!	#DIV/0!	#DIV/0!	#DIV/0!	#DIV/0!	#DIV/0!	#DIV/0!	#DIV/0!	#DIV/0!	#DIV/0!	#DIV/0!	#DIV/0!	0	0	0	0	0	0	#DIV/0!	#DIV/0!	#DIV/0!	#DIV/0!	#DIV/0!	#DIV/0!	#DIV/0!	0
						#DIV/0!		#DIV/0!															#DIV/0!	#DIV/0!	#DIV/0!	#DIV/0!	#DIV/0!	#DIV/0!	#DIV/0!	#DIV/0!	#DIV/0!	#DIV/0!	#DIV/0!	#DIV/0!	#DIV/0!	0	0	0	0	0	0	#DIV/0!	#DIV/0!	#DIV/0!	#DIV/0!	#DIV/0!	#DIV/0!	#DIV/0!	0
						#DIV/0!		#DIV/0!															#DIV/0!	#DIV/0!	#DIV/0!	#DIV/0!	#DIV/0!	#DIV/0!	#DIV/0!	#DIV/0!	#DIV/0!	#DIV/0!	#DIV/0!	#DIV/0!	#DIV/0!	0	0	0	0	0	0	#DIV/0!	#DIV/0!	#DIV/0!	#DIV/0!	#DIV/0!	#DIV/0!	#DIV/0!	0
						#DIV/0!		#DIV/0!															#DIV/0!	#DIV/0!	#DIV/0!	#DIV/0!	#DIV/0!	#DIV/0!	#DIV/0!	#DIV/0!	#DIV/0!	#DIV/0!	#DIV/0!	#DIV/0!	#DIV/0!	0	0	0	0	0	0	#DIV/0!	#DIV/0!	#DIV/0!	#DIV/0!	#DIV/0!	#DIV/0!	#DIV/0!	0
						#DIV/0!		#DIV/0!															#DIV/0!	#DIV/0!	#DIV/0!	#DIV/0!	#DIV/0!	#DIV/0!	#DIV/0!	#DIV/0!	#DIV/0!	#DIV/0!	#DIV/0!	#DIV/0!	#DIV/0!	0	0	0	0	0	0	#DIV/0!	#DIV/0!	#DIV/0!	#DIV/0!	#DIV/0!	#DIV/0!	#DIV/0!	0
						#DIV/0!		#DIV/0!															#DIV/0!	#DIV/0!	#DIV/0!	#DIV/0!	#DIV/0!	#DIV/0!	#DIV/0!	#DIV/0!	#DIV/0!	#DIV/0!	#DIV/0!	#DIV/0!	#DIV/0!	0	0	0	0	0	0	#DIV/0!	#DIV/0!	#DIV/0!	#DIV/0!	#DIV/0!	#DIV/0!	#DIV/0!	0
						#DIV/0!		#DIV/0!															#DIV/0!	#DIV/0!	#DIV/0!	#DIV/0!	#DIV/0!	#DIV/0!	#DIV/0!	#DIV/0!	#DIV/0!	#DIV/0!	#DIV/0!	#DIV/0!	#DIV/0!	0	0	0	0	0	0	#DIV/0!	#DIV/0!	#DIV/0!	#DIV/0!	#DIV/0!	#DIV/0!	#DIV/0!	0
						#DIV/0!		#DIV/0!															#DIV/0!	#DIV/0!	#DIV/0!	#DIV/0!	#DIV/0!	#DIV/0!	#DIV/0!	#DIV/0!	#DIV/0!	#DIV/0!	#DIV/0!	#DIV/0!	#DIV/0!	0	0	0	0	0	0	#DIV/0!	#DIV/0!	#DIV/0!	#DIV/0!	#DIV/0!	#DIV/0!	#DIV/0!	0
						#DIV/0!		#DIV/0!															#DIV/0!	#DIV/0!	#DIV/0!	#DIV/0!	#DIV/0!	#DIV/0!	#DIV/0!	#DIV/0!	#DIV/0!	#DIV/0!	#DIV/0!	#DIV/0!	#DIV/0!	0	0	0	0	0	0	#DIV/0!	#DIV/0!	#DIV/0!	#DIV/0!	#DIV/0!	#DIV/0!	#DIV/0!	0
						#DIV/0!		#DIV/0!															#DIV/0!	#DIV/0!	#DIV/0!	#DIV/0!	#DIV/0!	#DIV/0!	#DIV/0!	#DIV/0!	#DIV/0!	#DIV/0!	#DIV/0!	#DIV/0!	#DIV/0!	0	0	0	0	0	0	#DIV/0!	#DIV/0!	#DIV/0!	#DIV/0!	#DIV/0!	#DIV/0!	#DIV/0!	0
						#DIV/0!		#DIV/0!															#DIV/0!	#DIV/0!	#DIV/0!	#DIV/0!	#DIV/0!	#DIV/0!	#DIV/0!	#DIV/0!	#DIV/0!	#DIV/0!	#DIV/0!	#DIV/0!	#DIV/0!	0	0	0	0	0	0	#DIV/0!	#DIV/0!	#DIV/0!	#DIV/0!	#DIV/0!	#DIV/0!	#DIV/0!	0
						#DIV/0!		#DIV/0!															#DIV/0!	#DIV/0!	#DIV/0!	#DIV/0!	#DIV/0!	#DIV/0!	#DIV/0!	#DIV/0!	#DIV/0!	#DIV/0!	#DIV/0!	#DIV/0!	#DIV/0!	0	0	0	0	0	0	#DIV/0!	#DIV/0!	#DIV/0!	#DIV/0!	#DIV/0!	#DIV/0!	#DIV/0!	0
						#DIV/0!		#DIV/0!															#DIV/0!	#DIV/0!	#DIV/0!	#DIV/0!	#DIV/0!	#DIV/0!	#DIV/0!	#DIV/0!	#DIV/0!	#DIV/0!	#DIV/0!	#DIV/0!	#DIV/0!	0	0	0	0	0	0	#DIV/0!	#DIV/0!	#DIV/0!	#DIV/0!	#DIV/0!	#DIV/0!	#DIV/0!	0
						#DIV/0!		#DIV/0!															#DIV/0!	#DIV/0!	#DIV/0!	#DIV/0!	#DIV/0!	#DIV/0!	#DIV/0!	#DIV/0!	#DIV/0!	#DIV/0!	#DIV/0!	#DIV/0!	#DIV/0!	0	0	0	0	0	0	#DIV/0!	#DIV/0!	#DIV/0!	#DIV/0!	#DIV/0!	#DIV/0!	#DIV/0!	0
						#DIV/0!		#DIV/0!															#DIV/0!	#DIV/0!	#DIV/0!	#DIV/0!	#DIV/0!	#DIV/0!	#DIV/0!	#DIV/0!	#DIV/0!	#DIV/0!	#DIV/0!	#DIV/0!	#DIV/0!	0	0	0	0	0	0	#DIV/0!	#DIV/0!	#DIV/0!	#DIV/0!	#DIV/0!	#DIV/0!	#DIV/0!	0
						#DIV/0!		#DIV/0!															#DIV/0!	#DIV/0!	#DIV/0!	#DIV/0!	#DIV/0!	#DIV/0!	#DIV/0!	#DIV/0!	#DIV/0!	#DIV/0!	#DIV/0!	#DIV/0!	#DIV/0!	0	0	0	0	0	0	#DIV/0!	#DIV/0!	#DIV/0!	#DIV/0!	#DIV/0!	#DIV/0!	#DIV/0!	0
						#DIV/0!		#DIV/0!															#DIV/0!	#DIV/0!	#DIV/0!	#DIV/0!	#DIV/0!	#DIV/0!	#DIV/0!	#DIV/0!	#DIV/0!	#DIV/0!	#DIV/0!	#DIV/0!	#DIV/0!	0	0	0	0	0	0	#DIV/0!	#DIV/0!	#DIV/0!	#DIV/0!	#DIV/0!	#DIV/0!	#DIV/0!	0
						#DIV/0!		#DIV/0!															#DIV/0!	#DIV/0!	#DIV/0!	#DIV/0!	#DIV/0!	#DIV/0!	#DIV/0!	#DIV/0!	#DIV/0!	#DIV/0!	#DIV/0!	#DIV/0!	#DIV/0!	0	0	0	0	0	0	#DIV/0!	#DIV/0!	#DIV/0!	#DIV/0!	#DIV/0!	#DIV/0!	#DIV/0!	0
						#DIV/0!		#DIV/0!															#DIV/0!	#DIV/0!	#DIV/0!	#DIV/0!	#DIV/0!	#DIV/0!	#DIV/0!	#DIV/0!	#DIV/0!	#DIV/0!	#DIV/0!	#DIV/0!	#DIV/0!	0	0	0	0	0	0	#DIV/0!	#DIV/0!	#DIV/0!	#DIV/0!	#DIV/0!	#DIV/0!	#DIV/0!	0
						#DIV/0!		#DIV/0!															#DIV/0!	#DIV/0!	#DIV/0!	#DIV/0!	#DIV/0!	#DIV/0!	#DIV/0!	#DIV/0!	#DIV/0!	#DIV/0!	#DIV/0!	#DIV/0!	#DIV/0!	0	0	0	0	0	0	#DIV/0!	#DIV/0!	#DIV/0!	#DIV/0!	#DIV/0!	#DIV/0!	#DIV/0!	0
						#DIV/0!		#DIV/0!															#DIV/0!	#DIV/0!	#DIV/0!	#DIV/0!	#DIV/0!	#DIV/0!	#DIV/0!	#DIV/0!	#DIV/0!	#DIV/0!	#DIV/0!	#DIV/0!	#DIV/0!	0	0	0	0	0	0	#DIV/0!	#DIV/0!	#DIV/0!	#DIV/0!	#DIV/0!	#DIV/0!	#DIV/0!	0
						#DIV/0!		#DIV/0!															#DIV/0!	#DIV/0!	#DIV/0!	#DIV/0!	#DIV/0!	#DIV/0!	#DIV/0!	#DIV/0!	#DIV/0!	#DIV/0!	#DIV/0!	#DIV/0!	#DIV/0!	0	0	0	0	0	0	#DIV/0!	#DIV/0!	#DIV/0!	#DIV/0!	#DIV/0!	#DIV/0!	#DIV/0!	0
						#DIV/0!		#DIV/0!															#DIV/0!	#DIV/0!	#DIV/0!	#DIV/0!	#DIV/0!	#DIV/0!	#DIV/0!	#DIV/0!	#DIV/0!	#DIV/0!	#DIV/0!	#DIV/0!	#DIV/0!	0	0	0	0	0	0	#DIV/0!	#DIV/0!	#DIV/0!	#DIV/0!	#DIV/0!	#DIV/0!	#DIV/0!	0
						#DIV/0!		#DIV/0!															#DIV/0!	#DIV/0!	#DIV/0!	#DIV/0!	#DIV/0!	#DIV/0!	#DIV/0!	#DIV/0!	#DIV/0!	#DIV/0!	#DIV/0!	#DIV/0!	#DIV/0!	0	0	0	0	0	0	#DIV/0!	#DIV/0!	#DIV/0!	#DIV/0!	#DIV/0!	#DIV/0!	#DIV/0!	0
						#DIV/0!		#DIV/0!															#DIV/0!	#DIV/0!	#DIV/0!	#DIV/0!	#DIV/0!	#DIV/0!	#DIV/0!	#DIV/0!	#DIV/0!	#DIV/0!	#DIV/0!	#DIV/0!	#DIV/0!	0	0	0	0	0	0	#DIV/0!	#DIV/0!	#DIV/0!	#DIV/0!	#DIV/0!	#DIV/0!	#DIV/0!	0
						#DIV/0!		#DIV/0!															#DIV/0!	#DIV/0!	#DIV/0!	#DIV/0!	#DIV/0!	#DIV/0!	#DIV/0!	#DIV/0!	#DIV/0!	#DIV/0!	#DIV/0!	#DIV/0!	#DIV/0!	0	0	0	0	0	0	#DIV/0!	#DIV/0!	#DIV/0!	#DIV/0!	#DIV/0!	#DIV/0!	#DIV/0!	0
						#DIV/0!		#DIV/0!															#DIV/0!	#DIV/0!	#DIV/0!	#DIV/0!	#DIV/0!	#DIV/0!	#DIV/0!	#DIV/0!	#DIV/0!	#DIV/0!	#DIV/0!	#DIV/0!	#DIV/0!	0	0	0	0	0	0	#DIV/0!	#DIV/0!	#DIV/0!	#DIV/0!	#DIV/0!	#DIV/0!	#DIV/0!	0
						#DIV/0!		#DIV/0!															#DIV/0!	#DIV/0!	#DIV/0!	#DIV/0!	#DIV/0!	#DIV/0!	#DIV/0!	#DIV/0!	#DIV/0!	#DIV/0!	#DIV/0!	#DIV/0!	#DIV/0!	0	0	0	0	0	0	#DIV/0!	#DIV/0!	#DIV/0!	#DIV/0!	#DIV/0!	#DIV/0!	#DIV/0!	0
						#DIV/0!		#DIV/0!															#DIV/0!	#DIV/0!	#DIV/0!	#DIV/0!	#DIV/0!	#DIV/0!	#DIV/0!	#DIV/0!	#DIV/0!	#DIV/0!	#DIV/0!	#DIV/0!	#DIV/0!	0	0	0	0	0	0	#DIV/0!	#DIV/0!	#DIV/0!	#DIV/0!	#DIV/0!	#DIV/0!	#DIV/0!	0
						#DIV/0!		#DIV/0!															#DIV/0!	#DIV/0!	#DIV/0!	#DIV/0!	#DIV/0!	#DIV/0!	#DIV/0!	#DIV/0!	#DIV/0!	#DIV/0!	#DIV/0!	#DIV/0!	#DIV/0!	0	0	0	0	0	0	#DIV/0!	#DIV/0!	#DIV/0!	#DIV/0!	#DIV/0!	#DIV/0!	#DIV/0!	0
						#DIV/0!		#DIV/0!															#DIV/0!	#DIV/0!	#DIV/0!	#DIV/0!	#DIV/0!	#DIV/0!	#DIV/0!	#DIV/0!	#DIV/0!	#DIV/0!	#DIV/0!	#DIV/0!	#DIV/0!	0	0	0	0	0	0	#DIV/0!	#DIV/0!	#DIV/0!	#DIV/0!	#DIV/0!	#DIV/0!	#DIV/0!	0
						#DIV/0!		#DIV/0!															#DIV/0!	#DIV/0!	#DIV/0!	#DIV/0!	#DIV/0!	#DIV/0!	#DIV/0!	#DIV/0!	#DIV/0!	#DIV/0!	#DIV/0!	#DIV/0!	#DIV/0!	0	0	0	0	0	0	#DIV/0!	#DIV/0!	#DIV/0!	#DIV/0!	#DIV/0!	#DIV/0!	#DIV/0!	0
						#DIV/0!		#DIV/0!															#DIV/0!	#DIV/0!	#DIV/0!	#DIV/0!	#DIV/0!	#DIV/0!	#DIV/0!	#DIV/0!	#DIV/0!	#DIV/0!	#DIV/0!	#DIV/0!	#DIV/0!	0	0	0	0	0	0	#DIV/0!	#DIV/0!	#DIV/0!	#DIV/0!	#DIV/0!	#DIV/0!	#DIV/0!	0
						#DIV/0!		#DIV/0!															#DIV/0!	#DIV/0!	#DIV/0!	#DIV/0!	#DIV/0!	#DIV/0!	#DIV/0!	#DIV/0!	#DIV/0!	#DIV/0!	#DIV/0!	#DIV/0!	#DIV/0!	0	0	0	0	0	0	#DIV/0!	#DIV/0!	#DIV/0!	#DIV/0!	#DIV/0!	#DIV/0!	#DIV/0!	0
						#DIV/0!		#DIV/0!															#DIV/0!	#DIV/0!	#DIV/0!	#DIV/0!	#DIV/0!	#DIV/0!	#DIV/0!	#DIV/0!	#DIV/0!	#DIV/0!	#DIV/0!	#DIV/0!	#DIV/0!	0	0	0	0	0	0	#DIV/0!	#DIV/0!	#DIV/0!	#DIV/0!	#DIV/0!	#DIV/0!	#DIV/0!	0
						#DIV/0!		#DIV/0!															#DIV/0!	#DIV/0!	#DIV/0!	#DIV/0!	#DIV/0!	#DIV/0!	#DIV/0!	#DIV/0!	#DIV/0!	#DIV/0!	#DIV/0!	#DIV/0!	#DIV/0!	0	0	0	0	0	0	#DIV/0!	#DIV/0!	#DIV/0!	#DIV/0!	#DIV/0!	#DIV/0!	#DIV/0!	0
						#DIV/0!		#DIV/0!															#DIV/0!	#DIV/0!	#DIV/0!	#DIV/0!	#DIV/0!	#DIV/0!	#DIV/0!	#DIV/0!	#DIV/0!	#DIV/0!	#DIV/0!	#DIV/0!	#DIV/0!	0	0	0	0	0	0	#DIV/0!	#DIV/0!	#DIV/0!	#DIV/0!	#DIV/0!	#DIV/0!	#DIV/0!	0
						#DIV/0!		#DIV/0!															#DIV/0!	#DIV/0!	#DIV/0!	#DIV/0!	#DIV/0!	#DIV/0!	#DIV/0!	#DIV/0!	#DIV/0!	#DIV/0!	#DIV/0!	#DIV/0!	#DIV/0!	0	0	0	0	0	0	#DIV/0!	#DIV/0!	#DIV/0!	#DIV/0!	#DIV/0!	#DIV/0!	#DIV/0!	0
						#DIV/0!		#DIV/0!															#DIV/0!	#DIV/0!	#DIV/0!	#DIV/0!	#DIV/0!	#DIV/0!	#DIV/0!	#DIV/0!	#DIV/0!	#DIV/0!	#DIV/0!	#DIV/0!	#DIV/0!	0	0	0	0	0	0	#DIV/0!	#DIV/0!	#DIV/0!	#DIV/0!	#DIV/0!	#DIV/0!	#DIV/0!	0
						#DIV/0!		#DIV/0!															#DIV/0!	#DIV/0!	#DIV/0!	#DIV/0!	#DIV/0!	#DIV/0!	#DIV/0!	#DIV/0!	#DIV/0!	#DIV/0!	#DIV/0!	#DIV/0!	#DIV/0!	0	0	0	0	0	0	#DIV/0!	#DIV/0!	#DIV/0!	#DIV/0!	#DIV/0!	#DIV/0!	#DIV/0!	0
						#DIV/0!		#DIV/0!															#DIV/0!	#DIV/0!	#DIV/0!	#DIV/0!	#DIV/0!	#DIV/0!	#DIV/0!	#DIV/0!	#DIV/0!	#DIV/0!	#DIV/0!	#DIV/0!	#DIV/0!	0	0	0	0	0	0	#DIV/0!	#DIV/0!	#DIV/0!	#DIV/0!	#DIV/0!	#DIV/0!	#DIV/0!	0
						#DIV/0!		#DIV/0!															#DIV/0!	#DIV/0!	#DIV/0!	#DIV/0!	#DIV/0!	#DIV/0!	#DIV/0!	#DIV/0!	#DIV/0!	#DIV/0!	#DIV/0!	#DIV/0!	#DIV/0!	0	0	0	0	0	0	#DIV/0!	#DIV/0!	#DIV/0!	#DIV/0!	#DIV/0!	#DIV/0!	#DIV/0!	0
						#DIV/0!		#DIV/0!															#DIV/0!	#DIV/0!	#DIV/0!	#DIV/0!	#DIV/0!	#DIV/0!	#DIV/0!	#DIV/0!	#DIV/0!	#DIV/0!	#DIV/0!	#DIV/0!	#DIV/0!	0	0	0	0	0	0	#DIV/0!	#DIV/0!	#DIV/0!	#DIV/0!	#DIV/0!	#DIV/0!	#DIV/0!	0
						#DIV/0!		#DIV/0!															#DIV/0!	#DIV/0!	#DIV/0!	#DIV/0!	#DIV/0!	#DIV/0!	#DIV/0!	#DIV/0!	#DIV/0!	#DIV/0!	#DIV/0!	#DIV/0!	#DIV/0!	0	0	0	0	0	0	#DIV/0!	#DIV/0!	#DIV/0!	#DIV/0!	#DIV/0!	#DIV/0!	#DIV/0!	0
						#DIV/0!		#DIV/0!															#DIV/0!	#DIV/0!	#DIV/0!	#DIV/0!	#DIV/0!	#DIV/0!	#DIV/0!	#DIV/0!	#DIV/0!	#DIV/0!	#DIV/0!	#DIV/0!	#DIV/0!	0	0	0	0	0	0	#DIV/0!	#DIV/0!	#DIV/0!	#DIV/0!	#DIV/0!	#DIV/0!	#DIV/0!	0
						#DIV/0!		#DIV/0!															#DIV/0!	#DIV/0!	#DIV/0!	#DIV/0!	#DIV/0!	#DIV/0!	#DIV/0!	#DIV/0!	#DIV/0!	#DIV/0!	#DIV/0!	#DIV/0!	#DIV/0!	0	0	0	0	0	0	#DIV/0!	#DIV/0!	#DIV/0!	#DIV/0!	#DIV/0!	#DIV/0!	#DIV/0!	0
						#DIV/0!		#DIV/0!															#DIV/0!	#DIV/0!	#DIV/0!	#DIV/0!	#DIV/0!	#DIV/0!	#DIV/0!	#DIV/0!	#DIV/0!	#DIV/0!	#DIV/0!	#DIV/0!	#DIV/0!	0	0	0	0	0	0	#DIV/0!	#DIV/0!	#DIV/0!	#DIV/0!	#DIV/0!	#DIV/0!	#DIV/0!	0
						#DIV/0!		#DIV/0!															#DIV/0!	#DIV/0!	#DIV/0!	#DIV/0!	#DIV/0!	#DIV/0!	#DIV/0!	#DIV/0!	#DIV/0!	#DIV/0!	#DIV/0!	#DIV/0!	#DIV/0!	0	0	0	0	0	0	#DIV/0!	#DIV/0!	#DIV/0!	#DIV/0!	#DIV/0!	#DIV/0!	#DIV/0!	0
						#DIV/0!		#DIV/0!															#DIV/0!	#DIV/0!	#DIV/0!	#DIV/0!	#DIV/0!	#DIV/0!	#DIV/0!	#DIV/0!	#DIV/0!	#DIV/0!	#DIV/0!	#DIV/0!	#DIV/0!	0	0	0	0	0	0	#DIV/0!	#DIV/0!	#DIV/0!	#DIV/0!	#DIV/0!	#DIV/0!	#DIV/0!	0
						#DIV/0!		#DIV/0!															#DIV/0!	#DIV/0!	#DIV/0!	#DIV/0!	#DIV/0!	#DIV/0!	#DIV/0!	#DIV/0!	#DIV/0!	#DIV/0!	#DIV/0!	#DIV/0!	#DIV/0!	0	0	0	0	0	0	#DIV/0!	#DIV/0!	#DIV/0!	#DIV/0!	#DIV/0!	#DIV/0!	#DIV/0!	0
						#DIV/0!		#DIV/0!															#DIV/0!	#DIV/0!	#DIV/0!	#DIV/0!	#DIV/0!	#DIV/0!	#DIV/0!	#DIV/0!	#DIV/0!	#DIV/0!	#DIV/0!	#DIV/0!	#DIV/0!	0	0	0	0	0	0	#DIV/0!	#DIV/0!	#DIV/0!	#DIV/0!	#DIV/0!	#DIV/0!	#DIV/0!	0
						#DIV/0!		#DIV/0!															#DIV/0!	#DIV/0!	#DIV/0!	#DIV/0!	#DIV/0!	#DIV/0!	#DIV/0!	#DIV/0!	#DIV/0!	#DIV/0!	#DIV/0!	#DIV/0!	#DIV/0!	0	0	0	0	0	0	#DIV/0!	#DIV/0!	#DIV/0!	#DIV/0!	#DIV/0!	#DIV/0!	#DIV/0!	0
						#DIV/0!		#DIV/0!															#DIV/0!	#DIV/0!	#DIV/0!	#DIV/0!	#DIV/0!	#DIV/0!	#DIV/0!	#DIV/0!	#DIV/0!	#DIV/0!	#DIV/0!	#DIV/0!	#DIV/0!	0	0	0	0	0	0	#DIV/0!	#DIV/0!	#DIV/0!	#DIV/0!	#DIV/0!	#DIV/0!	#DIV/0!	0
						#DIV/0!		#DIV/0!															#DIV/0!	#DIV/0!	#DIV/0!	#DIV/0!	#DIV/0!	#DIV/0!	#DIV/0!	#DIV/0!	#DIV/0!	#DIV/0!	#DIV/0!	#DIV/0!	#DIV/0!	0	0	0	0	0	0	#DIV/0!	#DIV/0!	#DIV/0!	#DIV/0!	#DIV/0!	#DIV/0!	#DIV/0!	0
						#DIV/0!		#DIV/0!															#DIV/0!	#DIV/0!	#DIV/0!	#DIV/0!	#DIV/0!	#DIV/0!	#DIV/0!	#DIV/0!	#DIV/0!	#DIV/0!	#DIV/0!	#DIV/0!	#DIV/0!	0	0	0	0	0	0	#DIV/0!	#DIV/0!	#DIV/0!	#DIV/0!	#DIV/0!	#DIV/0!	#DIV/0!	0
						#DIV/0!		#DIV/0!															#DIV/0!	#DIV/0!	#DIV/0!	#DIV/0!	#DIV/0!	#DIV/0!	#DIV/0!	#DIV/0!	#DIV/0!	#DIV/0!	#DIV/0!	#DIV/0!	#DIV/0!	0	0	0	0	0	0	#DIV/0!	#DIV/0!	#DIV/0!	#DIV/0!	#DIV/0!	#DIV/0!	#DIV/0!	0
						#DIV/0!		#DIV/0!															#DIV/0!	#DIV/0!	#DIV/0!	#DIV/0!	#DIV/0!	#DIV/0!	#DIV/0!	#DIV/0!	#DIV/0!	#DIV/0!	#DIV/0!	#DIV/0!	#DIV/0!	0	0	0	0	0	0	#DIV/0!	#DIV/0!	#DIV/0!	#DIV/0!	#DIV/0!	#DIV/0!	#DIV/0!	0
						#DIV/0!		#DIV/0!															#DIV/0!	#DIV/0!	#DIV/0!	#DIV/0!	#DIV/0!	#DIV/0!	#DIV/0!	#DIV/0!	#DIV/0!	#DIV/0!	#DIV/0!	#DIV/0!	#DIV/0!	0	0	0	0	0	0	#DIV/0!	#DIV/0!	#DIV/0!	#DIV/0!	#DIV/0!	#DIV/0!	#DIV/0!	0
						#DIV/0!		#DIV/0!															#DIV/0!	#DIV/0!	#DIV/0!	#DIV/0!	#DIV/0!	#DIV/0!	#DIV/0!	#DIV/0!	#DIV/0!	#DIV/0!	#DIV/0!	#DIV/0!	#DIV/0!	0	0	0	0	0	0	#DIV/0!	#DIV/0!	#DIV/0!	#DIV/0!	#DIV/0!	#DIV/0!	#DIV/0!	0
						#DIV/0!		#DIV/0!															#DIV/0!	#DIV/0!	#DIV/0!	#DIV/0!	#DIV/0!	#DIV/0!	#DIV/0!	#DIV/0!	#DIV/0!	#DIV/0!	#DIV/0!	#DIV/0!	#DIV/0!	0	0	0	0	0	0	#DIV/0!	#DIV/0!	#DIV/0!	#DIV/0!	#DIV/0!	#DIV/0!	#DIV/0!	0
						#DIV/0!		#DIV/0!															#DIV/0!	#DIV/0!	#DIV/0!	#DIV/0!	#DIV/0!	#DIV/0!	#DIV/0!	#DIV/0!	#DIV/0!	#DIV/0!	#DIV/0!	#DIV/0!	#DIV/0!	0	0	0	0	0	0	#DIV/0!	#DIV/0!	#DIV/0!	#DIV/0!	#DIV/0!	#DIV/0!	#DIV/0!	0
						#DIV/0!		#DIV/0!															#DIV/0!	#DIV/0!	#DIV/0!	#DIV/0!	#DIV/0!	#DIV/0!	#DIV/0!	#DIV/0!	#DIV/0!	#DIV/0!	#DIV/0!	#DIV/0!	#DIV/0!	0	0	0	0	0	0	#DIV/0!	#DIV/0!	#DIV/0!	#DIV/0!	#DIV/0!	#DIV/0!	#DIV/0!	0
						#DIV/0!		#DIV/0!															#DIV/0!	#DIV/0!	#DIV/0!	#DIV/0!	#DIV/0!	#DIV/0!	#DIV/0!	#DIV/0!	#DIV/0!	#DIV/0!	#DIV/0!	#DIV/0!	#DIV/0!	0	0	0	0	0	0	#DIV/0!	#DIV/0!	#DIV/0!	#DIV/0!	#DIV/0!	#DIV/0!	#DIV/0!	0
						#DIV/0!		#DIV/0!															#DIV/0!	#DIV/0!	#DIV/0!	#DIV/0!	#DIV/0!	#DIV/0!	#DIV/0!	#DIV/0!	#DIV/0!	#DIV/0!	#DIV/0!	#DIV/0!	#DIV/0!	0	0	0	0	0	0	#DIV/0!	#DIV/0!	#DIV/0!	#DIV/0!	#DIV/0!	#DIV/0!	#DIV/0!	0
						#DIV/0!		#DIV/0!															#DIV/0!	#DIV/0!	#DIV/0!	#DIV/0!	#DIV/0!	#DIV/0!	#DIV/0!	#DIV/0!	#DIV/0!	#DIV/0!	#DIV/0!	#DIV/0!	#DIV/0!	0	0	0	0	0	0	#DIV/0!	#DIV/0!	#DIV/0!	#DIV/0!	#DIV/0!	#DIV/0!	#DIV/0!	0
						#DIV/0!		#DIV/0!															#DIV/0!	#DIV/0!	#DIV/0!	#DIV/0!	#DIV/0!	#DIV/0!	#DIV/0!	#DIV/0!	#DIV/0!	#DIV/0!	#DIV/0!	#DIV/0!	#DIV/0!	0	0	0	0	0	0	#DIV/0!	#DIV/0!	#DIV/0!	#DIV/0!	#DIV/0!	#DIV/0!	#DIV/0!	0
						#DIV/0!		#DIV/0!															#DIV/0!	#DIV/0!	#DIV/0!	#DIV/0!	#DIV/0!	#DIV/0!	#DIV/0!	#DIV/0!	#DIV/0!	#DIV/0!	#DIV/0!	#DIV/0!	#DIV/0!	0	0	0	0	0	0	#DIV/0!	#DIV/0!	#DIV/0!	#DIV/0!	#DIV/0!	#DIV/0!	#DIV/0!	0
						#DIV/0!		#DIV/0!															#DIV/0!	#DIV/0!	#DIV/0!	#DIV/0!	#DIV/0!	#DIV/0!	#DIV/0!	#DIV/0!	#DIV/0!	#DIV/0!	#DIV/0!	#DIV/0!	#DIV/0!	0	0	0	0	0	0	#DIV/0!	#DIV/0!	#DIV/0!	#DIV/0!	#DIV/0!	#DIV/0!	#DIV/0!	0
						#DIV/0!		#DIV/0!															#DIV/0!	#DIV/0!	#DIV/0!	#DIV/0!	#DIV/0!	#DIV/0!	#DIV/0!	#DIV/0!	#DIV/0!	#DIV/0!	#DIV/0!	#DIV/0!	#DIV/0!	0	0	0	0	0	0	#DIV/0!	#DIV/0!	#DIV/0!	#DIV/0!	#DIV/0!	#DIV/0!	#DIV/0!	0
						#DIV/0!		#DIV/0!															#DIV/0!	#DIV/0!	#DIV/0!	#DIV/0!	#DIV/0!	#DIV/0!	#DIV/0!	#DIV/0!	#DIV/0!	#DIV/0!	#DIV/0!	#DIV/0!	#DIV/0!	0	0	0	0	0	0	#DIV/0!	#DIV/0!	#DIV/0!	#DIV/0!	#DIV/0!	#DIV/0!	#DIV/0!	0
						#DIV/0!		#DIV/0!															#DIV/0!	#DIV/0!	#DIV/0!	#DIV/0!	#DIV/0!	#DIV/0!	#DIV/0!	#DIV/0!	#DIV/0!	#DIV/0!	#DIV/0!	#DIV/0!	#DIV/0!	0	0	0	0	0	0	#DIV/0!	#DIV/0!	#DIV/0!	#DIV/0!	#DIV/0!	#DIV/0!	#DIV/0!	0
						#DIV/0!		#DIV/0!															#DIV/0!	#DIV/0!	#DIV/0!	#DIV/0!	#DIV/0!	#DIV/0!	#DIV/0!	#DIV/0!	#DIV/0!	#DIV/0!	#DIV/0!	#DIV/0!	#DIV/0!	0	0	0	0	0	0	#DIV/0!	#DIV/0!	#DIV/0!	#DIV/0!	#DIV/0!	#DIV/0!	#DIV/0!	0
						#DIV/0!		#DIV/0!															#DIV/0!	#DIV/0!	#DIV/0!	#DIV/0!	#DIV/0!	#DIV/0!	#DIV/0!	#DIV/0!	#DIV/0!	#DIV/0!	#DIV/0!	#DIV/0!	#DIV/0!	0	0	0	0	0	0	#DIV/0!	#DIV/0!	#DIV/0!	#DIV/0!	#DIV/0!	#DIV/0!	#DIV/0!	0
						#DIV/0!		#DIV/0!															#DIV/0!	#DIV/0!	#DIV/0!	#DIV/0!	#DIV/0!	#DIV/0!	#DIV/0!	#DIV/0!	#DIV/0!	#DIV/0!	#DIV/0!	#DIV/0!	#DIV/0!	0	0	0	0	0	0	#DIV/0!	#DIV/0!	#DIV/0!	#DIV/0!	#DIV/0!	#DIV/0!	#DIV/0!	0
						#DIV/0!		#DIV/0!															#DIV/0!	#DIV/0!	#DIV/0!	#DIV/0!	#DIV/0!	#DIV/0!	#DIV/0!	#DIV/0!	#DIV/0!	#DIV/0!	#DIV/0!	#DIV/0!	#DIV/0!	0	0	0	0	0	0	#DIV/0!	#DIV/0!	#DIV/0!	#DIV/0!	#DIV/0!	#DIV/0!	#DIV/0!	0
						#DIV/0!		#DIV/0!															#DIV/0!	#DIV/0!	#DIV/0!	#DIV/0!	#DIV/0!	#DIV/0!	#DIV/0!	#DIV/0!	#DIV/0!	#DIV/0!	#DIV/0!	#DIV/0!	#DIV/0!	0	0	0	0	0	0	#DIV/0!	#DIV/0!	#DIV/0!	#DIV/0!	#DIV/0!	#DIV/0!	#DIV/0!	0
						#DIV/0!		#DIV/0!															#DIV/0!	#DIV/0!	#DIV/0!	#DIV/0!	#DIV/0!	#DIV/0!	#DIV/0!	#DIV/0!	#DIV/0!	#DIV/0!	#DIV/0!	#DIV/0!	#DIV/0!	0	0	0	0	0	0	#DIV/0!	#DIV/0!	#DIV/0!	#DIV/0!	#DIV/0!	#DIV/0!	#DIV/0!	0
						#DIV/0!		#DIV/0!															#DIV/0!	#DIV/0!	#DIV/0!	#DIV/0!	#DIV/0!	#DIV/0!	#DIV/0!	#DIV/0!	#DIV/0!	#DIV/0!	#DIV/0!	#DIV/0!	#DIV/0!	0	0	0	0	0	0	#DIV/0!	#DIV/0!	#DIV/0!	#DIV/0!	#DIV/0!	#DIV/0!	#DIV/0!	0
						#DIV/0!		#DIV/0!															#DIV/0!	#DIV/0!	#DIV/0!	#DIV/0!	#DIV/0!	#DIV/0!	#DIV/0!	#DIV/0!	#DIV/0!	#DIV/0!	#DIV/0!	#DIV/0!	#DIV/0!	0	0	0	0	0	0	#DIV/0!	#DIV/0!	#DIV/0!	#DIV/0!	#DIV/0!	#DIV/0!	#DIV/0!	0
						#DIV/0!		#DIV/0!															#DIV/0!	#DIV/0!	#DIV/0!	#DIV/0!	#DIV/0!	#DIV/0!	#DIV/0!	#DIV/0!	#DIV/0!	#DIV/0!	#DIV/0!	#DIV/0!	#DIV/0!	0	0	0	0	0	0	#DIV/0!	#DIV/0!	#DIV/0!	#DIV/0!	#DIV/0!	#DIV/0!	#DIV/0!	0
						#DIV/0!		#DIV/0!															#DIV/0!	#DIV/0!	#DIV/0!	#DIV/0!	#DIV/0!	#DIV/0!	#DIV/0!	#DIV/0!	#DIV/0!	#DIV/0!	#DIV/0!	#DIV/0!	#DIV/0!	0	0	0	0	0	0	#DIV/0!	#DIV/0!	#DIV/0!	#DIV/0!	#DIV/0!	#DIV/0!	#DIV/0!	0
						#DIV/0!		#DIV/0!															#DIV/0!	#DIV/0!	#DIV/0!	#DIV/0!	#DIV/0!	#DIV/0!	#DIV/0!	#DIV/0!	#DIV/0!	#DIV/0!	#DIV/0!	#DIV/0!	#DIV/0!	0	0	0	0	0	0	#DIV/0!	#DIV/0!	#DIV/0!	#DIV/0!	#DIV/0!	#DIV/0!	#DIV/0!	0
						#DIV/0!		#DIV/0!															#DIV/0!	#DIV/0!	#DIV/0!	#DIV/0!	#DIV/0!	#DIV/0!	#DIV/0!	#DIV/0!	#DIV/0!	#DIV/0!	#DIV/0!	#DIV/0!	#DIV/0!	0	0	0	0	0	0	#DIV/0!	#DIV/0!	#DIV/0!	#DIV/0!	#DIV/0!	#DIV/0!	#DIV/0!	0
						#DIV/0!		#DIV/0!															#DIV/0!	#DIV/0!	#DIV/0!	#DIV/0!	#DIV/0!	#DIV/0!	#DIV/0!	#DIV/0!	#DIV/0!	#DIV/0!	#DIV/0!	#DIV/0!	#DIV/0!	0	0	0	0	0	0	#DIV/0!	#DIV/0!	#DIV/0!	#DIV/0!	#DIV/0!	#DIV/0!	#DIV/0!	0
						#DIV/0!		#DIV/0!															#DIV/0!	#DIV/0!	#DIV/0!	#DIV/0!	#DIV/0!	#DIV/0!	#DIV/0!	#DIV/0!	#DIV/0!	#DIV/0!	#DIV/0!	#DIV/0!	#DIV/0!	0	0	0	0	0	0	#DIV/0!	#DIV/0!	#DIV/0!	#DIV/0!	#DIV/0!	#DIV/0!	#DIV/0!	0
						#DIV/0!		#DIV/0!															#DIV/0!	#DIV/0!	#DIV/0!	#DIV/0!	#DIV/0!	#DIV/0!	#DIV/0!	#DIV/0!	#DIV/0!	#DIV/0!	#DIV/0!	#DIV/0!	#DIV/0!	0	0	0	0	0	0	#DIV/0!	#DIV/0!	#DIV/0!	#DIV/0!	#DIV/0!	#DIV/0!	#DIV/0!	0
						#DIV/0!		#DIV/0!															#DIV/0!	#DIV/0!	#DIV/0!	#DIV/0!	#DIV/0!	#DIV/0!	#DIV/0!	#DIV/0!	#DIV/0!	#DIV/0!	#DIV/0!	#DIV/0!	#DIV/0!	0	0	0	0	0	0	#DIV/0!	#DIV/0!	#DIV/0!	#DIV/0!	#DIV/0!	#DIV/0!	#DIV/0!	0
						#DIV/0!		#DIV/0!															#DIV/0!	#DIV/0!	#DIV/0!	#DIV/0!	#DIV/0!	#DIV/0!	#DIV/0!	#DIV/0!	#DIV/0!	#DIV/0!	#DIV/0!	#DIV/0!	#DIV/0!	0	0	0	0	0	0	#DIV/0!	#DIV/0!	#DIV/0!	#DIV/0!	#DIV/0!	#DIV/0!	#DIV/0!	0
						#DIV/0!		#DIV/0!															#DIV/0!	#DIV/0!	#DIV/0!	#DIV/0!	#DIV/0!	#DIV/0!	#DIV/0!	#DIV/0!	#DIV/0!	#DIV/0!	#DIV/0!	#DIV/0!	#DIV/0!	0	0	0	0	0	0	#DIV/0!	#DIV/0!	#DIV/0!	#DIV/0!	#DIV/0!	#DIV/0!	#DIV/0!	0
						#DIV/0!		#DIV/0!															#DIV/0!	#DIV/0!	#DIV/0!	#DIV/0!	#DIV/0!	#DIV/0!	#DIV/0!	#DIV/0!	#DIV/0!	#DIV/0!	#DIV/0!	#DIV/0!	#DIV/0!	0	0	0	0	0	0	#DIV/0!	#DIV/0!	#DIV/0!	#DIV/0!	#DIV/0!	#DIV/0!	#DIV/0!	0
						#DIV/0!		#DIV/0!															#DIV/0!	#DIV/0!	#DIV/0!	#DIV/0!	#DIV/0!	#DIV/0!	#DIV/0!	#DIV/0!	#DIV/0!	#DIV/0!	#DIV/0!	#DIV/0!	#DIV/0!	0	0	0	0	0	0	#DIV/0!	#DIV/0!	#DIV/0!	#DIV/0!	#DIV/0!	#DIV/0!	#DIV/0!	0
						#DIV/0!		#DIV/0!															#DIV/0!	#DIV/0!	#DIV/0!	#DIV/0!	#DIV/0!	#DIV/0!	#DIV/0!	#DIV/0!	#DIV/0!	#DIV/0!	#DIV/0!	#DIV/0!	#DIV/0!	0	0	0	0	0	0	#DIV/0!	#DIV/0!	#DIV/0!	#DIV/0!	#DIV/0!	#DIV/0!	#DIV/0!	0
						#DIV/0!		#DIV/0!															#DIV/0!	#DIV/0!	#DIV/0!	#DIV/0!	#DIV/0!	#DIV/0!	#DIV/0!	#DIV/0!	#DIV/0!	#DIV/0!	#DIV/0!	#DIV/0!	#DIV/0!	0	0	0	0	0	0	#DIV/0!	#DIV/0!	#DIV/0!	#DIV/0!	#DIV/0!	#DIV/0!	#DIV/0!	0
						#DIV/0!		#DIV/0!															#DIV/0!	#DIV/0!	#DIV/0!	#DIV/0!	#DIV/0!	#DIV/0!	#DIV/0!	#DIV/0!	#DIV/0!	#DIV/0!	#DIV/0!	#DIV/0!	#DIV/0!	0	0	0	0	0	0	#DIV/0!	#DIV/0!	#DIV/0!	#DIV/0!	#DIV/0!	#DIV/0!	#DIV/0!	0
						#DIV/0!		#DIV/0!															#DIV/0!	#DIV/0!	#DIV/0!	#DIV/0!	#DIV/0!	#DIV/0!	#DIV/0!	#DIV/0!	#DIV/0!	#DIV/0!	#DIV/0!	#DIV/0!	#DIV/0!	0	0	0	0	0	0	#DIV/0!	#DIV/0!	#DIV/0!	#DIV/0!	#DIV/0!	#DIV/0!	#DIV/0!	0
						#DIV/0!		#DIV/0!															#DIV/0!	#DIV/0!	#DIV/0!	#DIV/0!	#DIV/0!	#DIV/0!	#DIV/0!	#DIV/0!	#DIV/0!	#DIV/0!	#DIV/0!	#DIV/0!	#DIV/0!	0	0	0	0	0	0	#DIV/0!	#DIV/0!	#DIV/0!	#DIV/0!	#DIV/0!	#DIV/0!	#DIV/0!	0
						#DIV/0!		#DIV/0!															#DIV/0!	#DIV/0!	#DIV/0!	#DIV/0!	#DIV/0!	#DIV/0!	#DIV/0!	#DIV/0!	#DIV/0!	#DIV/0!	#DIV/0!	#DIV/0!	#DIV/0!	0	0	0	0	0	0	#DIV/0!	#DIV/0!	#DIV/0!	#DIV/0!	#DIV/0!	#DIV/0!	#DIV/0!	0
						#DIV/0!		#DIV/0!															#DIV/0!	#DIV/0!	#DIV/0!	#DIV/0!	#DIV/0!	#DIV/0!	#DIV/0!	#DIV/0!	#DIV/0!	#DIV/0!	#DIV/0!	#DIV/0!	#DIV/0!	0	0	0	0	0	0	#DIV/0!	#DIV/0!	#DIV/0!	#DIV/0!	#DIV/0!	#DIV/0!	#DIV/0!	0
						#DIV/0!		#DIV/0!															#DIV/0!	#DIV/0!	#DIV/0!	#DIV/0!	#DIV/0!	#DIV/0!	#DIV/0!	#DIV/0!	#DIV/0!	#DIV/0!	#DIV/0!	#DIV/0!	#DIV/0!	0	0	0	0	0	0	#DIV/0!	#DIV/0!	#DIV/0!	#DIV/0!	#DIV/0!	#DIV/0!	#DIV/0!	0
						#DIV/0!		#DIV/0!															#DIV/0!	#DIV/0!	#DIV/0!	#DIV/0!	#DIV/0!	#DIV/0!	#DIV/0!	#DIV/0!	#DIV/0!	#DIV/0!	#DIV/0!	#DIV/0!	#DIV/0!	0	0	0	0	0	0	#DIV/0!	#DIV/0!	#DIV/0!	#DIV/0!	#DIV/0!	#DIV/0!	#DIV/0!	0
						#DIV/0!		#DIV/0!															#DIV/0!	#DIV/0!	#DIV/0!	#DIV/0!	#DIV/0!	#DIV/0!	#DIV/0!	#DIV/0!	#DIV/0!	#DIV/0!	#DIV/0!	#DIV/0!	#DIV/0!	0	0	0	0	0	0	#DIV/0!	#DIV/0!	#DIV/0!	#DIV/0!	#DIV/0!	#DIV/0!	#DIV/0!	0
						#DIV/0!		#DIV/0!															#DIV/0!	#DIV/0!	#DIV/0!	#DIV/0!	#DIV/0!	#DIV/0!	#DIV/0!	#DIV/0!	#DIV/0!	#DIV/0!	#DIV/0!	#DIV/0!	#DIV/0!	0	0	0	0	0	0	#DIV/0!	#DIV/0!	#DIV/0!	#DIV/0!	#DIV/0!	#DIV/0!	#DIV/0!	0
						#DIV/0!		#DIV/0!															#DIV/0!	#DIV/0!	#DIV/0!	#DIV/0!	#DIV/0!	#DIV/0!	#DIV/0!	#DIV/0!	#DIV/0!	#DIV/0!	#DIV/0!	#DIV/0!	#DIV/0!	0	0	0	0	0	0	#DIV/0!	#DIV/0!	#DIV/0!	#DIV/0!	#DIV/0!	#DIV/0!	#DIV/0!	0
						#DIV/0!		#DIV/0!															#DIV/0!	#DIV/0!	#DIV/0!	#DIV/0!	#DIV/0!	#DIV/0!	#DIV/0!	#DIV/0!	#DIV/0!	#DIV/0!	#DIV/0!	#DIV/0!	#DIV/0!	0	0	0	0	0	0	#DIV/0!	#DIV/0!	#DIV/0!	#DIV/0!	#DIV/0!	#DIV/0!	#DIV/0!	0
						#DIV/0!		#DIV/0!															#DIV/0!	#DIV/0!	#DIV/0!	#DIV/0!	#DIV/0!	#DIV/0!	#DIV/0!	#DIV/0!	#DIV/0!	#DIV/0!	#DIV/0!	#DIV/0!	#DIV/0!	0	0	0	0	0	0	#DIV/0!	#DIV/0!	#DIV/0!	#DIV/0!	#DIV/0!	#DIV/0!	#DIV/0!	0
						#DIV/0!		#DIV/0!															#DIV/0!	#DIV/0!	#DIV/0!	#DIV/0!	#DIV/0!	#DIV/0!	#DIV/0!	#DIV/0!	#DIV/0!	#DIV/0!	#DIV/0!	#DIV/0!	#DIV/0!	0	0	0	0	0	0	#DIV/0!	#DIV/0!	#DIV/0!	#DIV/0!	#DIV/0!	#DIV/0!	#DIV/0!	0
						#DIV/0!		#DIV/0!															#DIV/0!	#DIV/0!	#DIV/0!	#DIV/0!	#DIV/0!	#DIV/0!	#DIV/0!	#DIV/0!	#DIV/0!	#DIV/0!	#DIV/0!	#DIV/0!	#DIV/0!	0	0	0	0	0	0	#DIV/0!	#DIV/0!	#DIV/0!	#DIV/0!	#DIV/0!	#DIV/0!	#DIV/0!	0
						#DIV/0!		#DIV/0!															#DIV/0!	#DIV/0!	#DIV/0!	#DIV/0!	#DIV/0!	#DIV/0!	#DIV/0!	#DIV/0!	#DIV/0!	#DIV/0!	#DIV/0!	#DIV/0!	#DIV/0!	0	0	0	0	0	0	#DIV/0!	#DIV/0!	#DIV/0!	#DIV/0!	#DIV/0!	#DIV/0!	#DIV/0!	0
						#DIV/0!		#DIV/0!															#DIV/0!	#DIV/0!	#DIV/0!	#DIV/0!	#DIV/0!	#DIV/0!	#DIV/0!	#DIV/0!	#DIV/0!	#DIV/0!	#DIV/0!	#DIV/0!	#DIV/0!	0	0	0	0	0	0	#DIV/0!	#DIV/0!	#DIV/0!	#DIV/0!	#DIV/0!	#DIV/0!	#DIV/0!	0
						#DIV/0!		#DIV/0!															#DIV/0!	#DIV/0!	#DIV/0!	#DIV/0!	#DIV/0!	#DIV/0!	#DIV/0!	#DIV/0!	#DIV/0!	#DIV/0!	#DIV/0!	#DIV/0!	#DIV/0!	0	0	0	0	0	0	#DIV/0!	#DIV/0!	#DIV/0!	#DIV/0!	#DIV/0!	#DIV/0!	#DIV/0!	0
						#DIV/0!		#DIV/0!															#DIV/0!	#DIV/0!	#DIV/0!	#DIV/0!	#DIV/0!	#DIV/0!	#DIV/0!	#DIV/0!	#DIV/0!	#DIV/0!	#DIV/0!	#DIV/0!	#DIV/0!	0	0	0	0	0	0	#DIV/0!	#DIV/0!	#DIV/0!	#DIV/0!	#DIV/0!	#DIV/0!	#DIV/0!	0
						#DIV/0!		#DIV/0!															#DIV/0!	#DIV/0!	#DIV/0!	#DIV/0!	#DIV/0!	#DIV/0!	#DIV/0!	#DIV/0!	#DIV/0!	#DIV/0!	#DIV/0!	#DIV/0!	#DIV/0!	0	0	0	0	0	0	#DIV/0!	#DIV/0!	#DIV/0!	#DIV/0!	#DIV/0!	#DIV/0!	#DIV/0!	0
						#DIV/0!		#DIV/0!															#DIV/0!	#DIV/0!	#DIV/0!	#DIV/0!	#DIV/0!	#DIV/0!	#DIV/0!	#DIV/0!	#DIV/0!	#DIV/0!	#DIV/0!	#DIV/0!	#DIV/0!	0	0	0	0	0	0	#DIV/0!	#DIV/0!	#DIV/0!	#DIV/0!	#DIV/0!	#DIV/0!	#DIV/0!	0
						#DIV/0!		#DIV/0!															#DIV/0!	#DIV/0!	#DIV/0!	#DIV/0!	#DIV/0!	#DIV/0!	#DIV/0!	#DIV/0!	#DIV/0!	#DIV/0!	#DIV/0!	#DIV/0!	#DIV/0!	0	0	0	0	0	0	#DIV/0!	#DIV/0!	#DIV/0!	#DIV/0!	#DIV/0!	#DIV/0!	#DIV/0!	0
						#DIV/0!		#DIV/0!															#DIV/0!	#DIV/0!	#DIV/0!	#DIV/0!	#DIV/0!	#DIV/0!	#DIV/0!	#DIV/0!	#DIV/0!	#DIV/0!	#DIV/0!	#DIV/0!	#DIV/0!	0	0	0	0	0	0	#DIV/0!	#DIV/0!	#DIV/0!	#DIV/0!	#DIV/0!	#DIV/0!	#DIV/0!	0
						#DIV/0!		#DIV/0!															#DIV/0!	#DIV/0!	#DIV/0!	#DIV/0!	#DIV/0!	#DIV/0!	#DIV/0!	#DIV/0!	#DIV/0!	#DIV/0!	#DIV/0!	#DIV/0!	#DIV/0!	0	0	0	0	0	0	#DIV/0!	#DIV/0!	#DIV/0!	#DIV/0!	#DIV/0!	#DIV/0!	#DIV/0!	0
						#DIV/0!		#DIV/0!															#DIV/0!	#DIV/0!	#DIV/0!	#DIV/0!	#DIV/0!	#DIV/0!	#DIV/0!	#DIV/0!	#DIV/0!	#DIV/0!	#DIV/0!	#DIV/0!	#DIV/0!	0	0	0	0	0	0	#DIV/0!	#DIV/0!	#DIV/0!	#DIV/0!	#DIV/0!	#DIV/0!	#DIV/0!	0
						#DIV/0!		#DIV/0!															#DIV/0!	#DIV/0!	#DIV/0!	#DIV/0!	#DIV/0!	#DIV/0!	#DIV/0!	#DIV/0!	#DIV/0!	#DIV/0!	#DIV/0!	#DIV/0!	#DIV/0!	0	0	0	0	0	0	#DIV/0!	#DIV/0!	#DIV/0!	#DIV/0!	#DIV/0!	#DIV/0!	#DIV/0!	0
						#DIV/0!		#DIV/0!															#DIV/0!	#DIV/0!	#DIV/0!	#DIV/0!	#DIV/0!	#DIV/0!	#DIV/0!	#DIV/0!	#DIV/0!	#DIV/0!	#DIV/0!	#DIV/0!	#DIV/0!	0	0	0	0	0	0	#DIV/0!	#DIV/0!	#DIV/0!	#DIV/0!	#DIV/0!	#DIV/0!	#DIV/0!	0
						#DIV/0!		#DIV/0!															#DIV/0!	#DIV/0!	#DIV/0!	#DIV/0!	#DIV/0!	#DIV/0!	#DIV/0!	#DIV/0!	#DIV/0!	#DIV/0!	#DIV/0!	#DIV/0!	#DIV/0!	0	0	0	0	0	0	#DIV/0!	#DIV/0!	#DIV/0!	#DIV/0!	#DIV/0!	#DIV/0!	#DIV/0!	0
						#DIV/0!		#DIV/0!															#DIV/0!	#DIV/0!	#DIV/0!	#DIV/0!	#DIV/0!	#DIV/0!	#DIV/0!	#DIV/0!	#DIV/0!	#DIV/0!	#DIV/0!	#DIV/0!	#DIV/0!	0	0	0	0	0	0	#DIV/0!	#DIV/0!	#DIV/0!	#DIV/0!	#DIV/0!	#DIV/0!	#DIV/0!	0
						#DIV/0!		#DIV/0!															#DIV/0!	#DIV/0!	#DIV/0!	#DIV/0!	#DIV/0!	#DIV/0!	#DIV/0!	#DIV/0!	#DIV/0!	#DIV/0!	#DIV/0!	#DIV/0!	#DIV/0!	0	0	0	0	0	0	#DIV/0!	#DIV/0!	#DIV/0!	#DIV/0!	#DIV/0!	#DIV/0!	#DIV/0!	0
						#DIV/0!		#DIV/0!															#DIV/0!	#DIV/0!	#DIV/0!	#DIV/0!	#DIV/0!	#DIV/0!	#DIV/0!	#DIV/0!	#DIV/0!	#DIV/0!	#DIV/0!	#DIV/0!	#DIV/0!	0	0	0	0	0	0	#DIV/0!	#DIV/0!	#DIV/0!	#DIV/0!	#DIV/0!	#DIV/0!	#DIV/0!	0
						#DIV/0!		#DIV/0!															#DIV/0!	#DIV/0!	#DIV/0!	#DIV/0!	#DIV/0!	#DIV/0!	#DIV/0!	#DIV/0!	#DIV/0!	#DIV/0!	#DIV/0!	#DIV/0!	#DIV/0!	0	0	0	0	0	0	#DIV/0!	#DIV/0!	#DIV/0!	#DIV/0!	#DIV/0!	#DIV/0!	#DIV/0!	0
						#DIV/0!		#DIV/0!															#DIV/0!	#DIV/0!	#DIV/0!	#DIV/0!	#DIV/0!	#DIV/0!	#DIV/0!	#DIV/0!	#DIV/0!	#DIV/0!	#DIV/0!	#DIV/0!	#DIV/0!	0	0	0	0	0	0	#DIV/0!	#DIV/0!	#DIV/0!	#DIV/0!	#DIV/0!	#DIV/0!	#DIV/0!	0
						#DIV/0!		#DIV/0!															#DIV/0!	#DIV/0!	#DIV/0!	#DIV/0!	#DIV/0!	#DIV/0!	#DIV/0!	#DIV/0!	#DIV/0!	#DIV/0!	#DIV/0!	#DIV/0!	#DIV/0!	0	0	0	0	0	0	#DIV/0!	#DIV/0!	#DIV/0!	#DIV/0!	#DIV/0!	#DIV/0!	#DIV/0!	0
						#DIV/0!		#DIV/0!															#DIV/0!	#DIV/0!	#DIV/0!	#DIV/0!	#DIV/0!	#DIV/0!	#DIV/0!	#DIV/0!	#DIV/0!	#DIV/0!	#DIV/0!	#DIV/0!	#DIV/0!	0	0	0	0	0	0	#DIV/0!	#DIV/0!	#DIV/0!	#DIV/0!	#DIV/0!	#DIV/0!	#DIV/0!	0
						#DIV/0!		#DIV/0!															#DIV/0!	#DIV/0!	#DIV/0!	#DIV/0!	#DIV/0!	#DIV/0!	#DIV/0!	#DIV/0!	#DIV/0!	#DIV/0!	#DIV/0!	#DIV/0!	#DIV/0!	0	0	0	0	0	0	#DIV/0!	#DIV/0!	#DIV/0!	#DIV/0!	#DIV/0!	#DIV/0!	#DIV/0!	0
						#DIV/0!		#DIV/0!															#DIV/0!	#DIV/0!	#DIV/0!	#DIV/0!	#DIV/0!	#DIV/0!	#DIV/0!	#DIV/0!	#DIV/0!	#DIV/0!	#DIV/0!	#DIV/0!	#DIV/0!	0	0	0	0	0	0	#DIV/0!	#DIV/0!	#DIV/0!	#DIV/0!	#DIV/0!	#DIV/0!	#DIV/0!	0
						#DIV/0!		#DIV/0!															#DIV/0!	#DIV/0!	#DIV/0!	#DIV/0!	#DIV/0!	#DIV/0!	#DIV/0!	#DIV/0!	#DIV/0!	#DIV/0!	#DIV/0!	#DIV/0!	#DIV/0!	0	0	0	0	0	0	#DIV/0!	#DIV/0!	#DIV/0!	#DIV/0!	#DIV/0!	#DIV/0!	#DIV/0!	0
						#DIV/0!		#DIV/0!															#DIV/0!	#DIV/0!	#DIV/0!	#DIV/0!	#DIV/0!	#DIV/0!	#DIV/0!	#DIV/0!	#DIV/0!	#DIV/0!	#DIV/0!	#DIV/0!	#DIV/0!	0	0	0	0	0	0	#DIV/0!	#DIV/0!	#DIV/0!	#DIV/0!	#DIV/0!	#DIV/0!	#DIV/0!	0
						#DIV/0!		#DIV/0!															#DIV/0!	#DIV/0!	#DIV/0!	#DIV/0!	#DIV/0!	#DIV/0!	#DIV/0!	#DIV/0!	#DIV/0!	#DIV/0!	#DIV/0!	#DIV/0!	#DIV/0!	0	0	0	0	0	0	#DIV/0!	#DIV/0!	#DIV/0!	#DIV/0!	#DIV/0!	#DIV/0!	#DIV/0!	0
						#DIV/0!		#DIV/0!															#DIV/0!	#DIV/0!	#DIV/0!	#DIV/0!	#DIV/0!	#DIV/0!	#DIV/0!	#DIV/0!	#DIV/0!	#DIV/0!	#DIV/0!	#DIV/0!	#DIV/0!	0	0	0	0	0	0	#DIV/0!	#DIV/0!	#DIV/0!	#DIV/0!	#DIV/0!	#DIV/0!	#DIV/0!	0
						#DIV/0!		#DIV/0!															#DIV/0!	#DIV/0!	#DIV/0!	#DIV/0!	#DIV/0!	#DIV/0!	#DIV/0!	#DIV/0!	#DIV/0!	#DIV/0!	#DIV/0!	#DIV/0!	#DIV/0!	0	0	0	0	0	0	#DIV/0!	#DIV/0!	#DIV/0!	#DIV/0!	#DIV/0!	#DIV/0!	#DIV/0!	0
						#DIV/0!		#DIV/0!															#DIV/0!	#DIV/0!	#DIV/0!	#DIV/0!	#DIV/0!	#DIV/0!	#DIV/0!	#DIV/0!	#DIV/0!	#DIV/0!	#DIV/0!	#DIV/0!	#DIV/0!	0	0	0	0	0	0	#DIV/0!	#DIV/0!	#DIV/0!	#DIV/0!	#DIV/0!	#DIV/0!	#DIV/0!	0
						#DIV/0!		#DIV/0!															#DIV/0!	#DIV/0!	#DIV/0!	#DIV/0!	#DIV/0!	#DIV/0!	#DIV/0!	#DIV/0!	#DIV/0!	#DIV/0!	#DIV/0!	#DIV/0!	#DIV/0!	0	0	0	0	0	0	#DIV/0!	#DIV/0!	#DIV/0!	#DIV/0!	#DIV/0!	#DIV/0!	#DIV/0!	0
						#DIV/0!		#DIV/0!															#DIV/0!	#DIV/0!	#DIV/0!	#DIV/0!	#DIV/0!	#DIV/0!	#DIV/0!	#DIV/0!	#DIV/0!	#DIV/0!	#DIV/0!	#DIV/0!	#DIV/0!	0	0	0	0	0	0	#DIV/0!	#DIV/0!	#DIV/0!	#DIV/0!	#DIV/0!	#DIV/0!	#DIV/0!	0
						#DIV/0!		#DIV/0!															#DIV/0!	#DIV/0!	#DIV/0!	#DIV/0!	#DIV/0!	#DIV/0!	#DIV/0!	#DIV/0!	#DIV/0!	#DIV/0!	#DIV/0!	#DIV/0!	#DIV/0!	0	0	0	0	0	0	#DIV/0!	#DIV/0!	#DIV/0!	#DIV/0!	#DIV/0!	#DIV/0!	#DIV/0!	0
						#DIV/0!		#DIV/0!															#DIV/0!	#DIV/0!	#DIV/0!	#DIV/0!	#DIV/0!	#DIV/0!	#DIV/0!	#DIV/0!	#DIV/0!	#DIV/0!	#DIV/0!	#DIV/0!	#DIV/0!	0	0	0	0	0	0	#DIV/0!	#DIV/0!	#DIV/0!	#DIV/0!	#DIV/0!	#DIV/0!	#DIV/0!	0
						#DIV/0!		#DIV/0!															#DIV/0!	#DIV/0!	#DIV/0!	#DIV/0!	#DIV/0!	#DIV/0!	#DIV/0!	#DIV/0!	#DIV/0!	#DIV/0!	#DIV/0!	#DIV/0!	#DIV/0!	0	0	0	0	0	0	#DIV/0!	#DIV/0!	#DIV/0!	#DIV/0!	#DIV/0!	#DIV/0!	#DIV/0!	0
						#DIV/0!		#DIV/0!															#DIV/0!	#DIV/0!	#DIV/0!	#DIV/0!	#DIV/0!	#DIV/0!	#DIV/0!	#DIV/0!	#DIV/0!	#DIV/0!	#DIV/0!	#DIV/0!	#DIV/0!	0	0	0	0	0	0	#DIV/0!	#DIV/0!	#DIV/0!	#DIV/0!	#DIV/0!	#DIV/0!	#DIV/0!	0
						#DIV/0!		#DIV/0!															#DIV/0!	#DIV/0!	#DIV/0!	#DIV/0!	#DIV/0!	#DIV/0!	#DIV/0!	#DIV/0!	#DIV/0!	#DIV/0!	#DIV/0!	#DIV/0!	#DIV/0!	0	0	0	0	0	0	#DIV/0!	#DIV/0!	#DIV/0!	#DIV/0!	#DIV/0!	#DIV/0!	#DIV/0!	0
						#DIV/0!		#DIV/0!															#DIV/0!	#DIV/0!	#DIV/0!	#DIV/0!	#DIV/0!	#DIV/0!	#DIV/0!	#DIV/0!	#DIV/0!	#DIV/0!	#DIV/0!	#DIV/0!	#DIV/0!	0	0	0	0	0	0	#DIV/0!	#DIV/0!	#DIV/0!	#DIV/0!	#DIV/0!	#DIV/0!	#DIV/0!	0
						#DIV/0!		#DIV/0!															#DIV/0!	#DIV/0!	#DIV/0!	#DIV/0!	#DIV/0!	#DIV/0!	#DIV/0!	#DIV/0!	#DIV/0!	#DIV/0!	#DIV/0!	#DIV/0!	#DIV/0!	0	0	0	0	0	0	#DIV/0!	#DIV/0!	#DIV/0!	#DIV/0!	#DIV/0!	#DIV/0!	#DIV/0!	0
						#DIV/0!		#DIV/0!															#DIV/0!	#DIV/0!	#DIV/0!	#DIV/0!	#DIV/0!	#DIV/0!	#DIV/0!	#DIV/0!	#DIV/0!	#DIV/0!	#DIV/0!	#DIV/0!	#DIV/0!	0	0	0	0	0	0	#DIV/0!	#DIV/0!	#DIV/0!	#DIV/0!	#DIV/0!	#DIV/0!	#DIV/0!	0
						#DIV/0!		#DIV/0!															#DIV/0!	#DIV/0!	#DIV/0!	#DIV/0!	#DIV/0!	#DIV/0!	#DIV/0!	#DIV/0!	#DIV/0!	#DIV/0!	#DIV/0!	#DIV/0!	#DIV/0!	0	0	0	0	0	0	#DIV/0!	#DIV/0!	#DIV/0!	#DIV/0!	#DIV/0!	#DIV/0!	#DIV/0!	0
						#DIV/0!		#DIV/0!															#DIV/0!	#DIV/0!	#DIV/0!	#DIV/0!	#DIV/0!	#DIV/0!	#DIV/0!	#DIV/0!	#DIV/0!	#DIV/0!	#DIV/0!	#DIV/0!	#DIV/0!	0	0	0	0	0	0	#DIV/0!	#DIV/0!	#DIV/0!	#DIV/0!	#DIV/0!	#DIV/0!	#DIV/0!	0
						#DIV/0!		#DIV/0!															#DIV/0!	#DIV/0!	#DIV/0!	#DIV/0!	#DIV/0!	#DIV/0!	#DIV/0!	#DIV/0!	#DIV/0!	#DIV/0!	#DIV/0!	#DIV/0!	#DIV/0!	0	0	0	0	0	0	#DIV/0!	#DIV/0!	#DIV/0!	#DIV/0!	#DIV/0!	#DIV/0!	#DIV/0!	0
						#DIV/0!		#DIV/0!															#DIV/0!	#DIV/0!	#DIV/0!	#DIV/0!	#DIV/0!	#DIV/0!	#DIV/0!	#DIV/0!	#DIV/0!	#DIV/0!	#DIV/0!	#DIV/0!	#DIV/0!	0	0	0	0	0	0	#DIV/0!	#DIV/0!	#DIV/0!	#DIV/0!	#DIV/0!	#DIV/0!	#DIV/0!	0
						#DIV/0!		#DIV/0!															#DIV/0!	#DIV/0!	#DIV/0!	#DIV/0!	#DIV/0!	#DIV/0!	#DIV/0!	#DIV/0!	#DIV/0!	#DIV/0!	#DIV/0!	#DIV/0!	#DIV/0!	0	0	0	0	0	0	#DIV/0!	#DIV/0!	#DIV/0!	#DIV/0!	#DIV/0!	#DIV/0!	#DIV/0!	0
						#DIV/0!		#DIV/0!															#DIV/0!	#DIV/0!	#DIV/0!	#DIV/0!	#DIV/0!	#DIV/0!	#DIV/0!	#DIV/0!	#DIV/0!	#DIV/0!	#DIV/0!	#DIV/0!	#DIV/0!	0	0	0	0	0	0	#DIV/0!	#DIV/0!	#DIV/0!	#DIV/0!	#DIV/0!	#DIV/0!	#DIV/0!	0
						#DIV/0!		#DIV/0!															#DIV/0!	#DIV/0!	#DIV/0!	#DIV/0!	#DIV/0!	#DIV/0!	#DIV/0!	#DIV/0!	#DIV/0!	#DIV/0!	#DIV/0!	#DIV/0!	#DIV/0!	0	0	0	0	0	0	#DIV/0!	#DIV/0!	#DIV/0!	#DIV/0!	#DIV/0!	#DIV/0!	#DIV/0!	0
						#DIV/0!		#DIV/0!															#DIV/0!	#DIV/0!	#DIV/0!	#DIV/0!	#DIV/0!	#DIV/0!	#DIV/0!	#DIV/0!	#DIV/0!	#DIV/0!	#DIV/0!	#DIV/0!	#DIV/0!	0	0	0	0	0	0	#DIV/0!	#DIV/0!	#DIV/0!	#DIV/0!	#DIV/0!	#DIV/0!	#DIV/0!	0
						#DIV/0!		#DIV/0!															#DIV/0!	#DIV/0!	#DIV/0!	#DIV/0!	#DIV/0!	#DIV/0!	#DIV/0!	#DIV/0!	#DIV/0!	#DIV/0!	#DIV/0!	#DIV/0!	#DIV/0!	0	0	0	0	0	0	#DIV/0!	#DIV/0!	#DIV/0!	#DIV/0!	#DIV/0!	#DIV/0!	#DIV/0!	0
						#DIV/0!		#DIV/0!															#DIV/0!	#DIV/0!	#DIV/0!	#DIV/0!	#DIV/0!	#DIV/0!	#DIV/0!	#DIV/0!	#DIV/0!	#DIV/0!	#DIV/0!	#DIV/0!	#DIV/0!	0	0	0	0	0	0	#DIV/0!	#DIV/0!	#DIV/0!	#DIV/0!	#DIV/0!	#DIV/0!	#DIV/0!	0
						#DIV/0!		#DIV/0!															#DIV/0!	#DIV/0!	#DIV/0!	#DIV/0!	#DIV/0!	#DIV/0!	#DIV/0!	#DIV/0!	#DIV/0!	#DIV/0!	#DIV/0!	#DIV/0!	#DIV/0!	0	0	0	0	0	0	#DIV/0!	#DIV/0!	#DIV/0!	#DIV/0!	#DIV/0!	#DIV/0!	#DIV/0!	0
						#DIV/0!		#DIV/0!															#DIV/0!	#DIV/0!	#DIV/0!	#DIV/0!	#DIV/0!	#DIV/0!	#DIV/0!	#DIV/0!	#DIV/0!	#DIV/0!	#DIV/0!	#DIV/0!	#DIV/0!	0	0	0	0	0	0	#DIV/0!	#DIV/0!	#DIV/0!	#DIV/0!	#DIV/0!	#DIV/0!	#DIV/0!	0
						#DIV/0!		#DIV/0!															#DIV/0!	#DIV/0!	#DIV/0!	#DIV/0!	#DIV/0!	#DIV/0!	#DIV/0!	#DIV/0!	#DIV/0!	#DIV/0!	#DIV/0!	#DIV/0!	#DIV/0!	0	0	0	0	0	0	#DIV/0!	#DIV/0!	#DIV/0!	#DIV/0!	#DIV/0!	#DIV/0!	#DIV/0!	0
						#DIV/0!		#DIV/0!															#DIV/0!	#DIV/0!	#DIV/0!	#DIV/0!	#DIV/0!	#DIV/0!	#DIV/0!	#DIV/0!	#DIV/0!	#DIV/0!	#DIV/0!	#DIV/0!	#DIV/0!	0	0	0	0	0	0	#DIV/0!	#DIV/0!	#DIV/0!	#DIV/0!	#DIV/0!	#DIV/0!	#DIV/0!	0
						#DIV/0!		#DIV/0!															#DIV/0!	#DIV/0!	#DIV/0!	#DIV/0!	#DIV/0!	#DIV/0!	#DIV/0!	#DIV/0!	#DIV/0!	#DIV/0!	#DIV/0!	#DIV/0!	#DIV/0!	0	0	0	0	0	0	#DIV/0!	#DIV/0!	#DIV/0!	#DIV/0!	#DIV/0!	#DIV/0!	#DIV/0!	0
						#DIV/0!		#DIV/0!															#DIV/0!	#DIV/0!	#DIV/0!	#DIV/0!	#DIV/0!	#DIV/0!	#DIV/0!	#DIV/0!	#DIV/0!	#DIV/0!	#DIV/0!	#DIV/0!	#DIV/0!	0	0	0	0	0	0	#DIV/0!	#DIV/0!	#DIV/0!	#DIV/0!	#DIV/0!	#DIV/0!	#DIV/0!	0
						#DIV/0!		#DIV/0!															#DIV/0!	#DIV/0!	#DIV/0!	#DIV/0!	#DIV/0!	#DIV/0!	#DIV/0!	#DIV/0!	#DIV/0!	#DIV/0!	#DIV/0!	#DIV/0!	#DIV/0!	0	0	0	0	0	0	#DIV/0!	#DIV/0!	#DIV/0!	#DIV/0!	#DIV/0!	#DIV/0!	#DIV/0!	0
						#DIV/0!		#DIV/0!															#DIV/0!	#DIV/0!	#DIV/0!	#DIV/0!	#DIV/0!	#DIV/0!	#DIV/0!	#DIV/0!	#DIV/0!	#DIV/0!	#DIV/0!	#DIV/0!	#DIV/0!	0	0	0	0	0	0	#DIV/0!	#DIV/0!	#DIV/0!	#DIV/0!	#DIV/0!	#DIV/0!	#DIV/0!	0
						#DIV/0!		#DIV/0!															#DIV/0!	#DIV/0!	#DIV/0!	#DIV/0!	#DIV/0!	#DIV/0!	#DIV/0!	#DIV/0!	#DIV/0!	#DIV/0!	#DIV/0!	#DIV/0!	#DIV/0!	0	0	0	0	0	0	#DIV/0!	#DIV/0!	#DIV/0!	#DIV/0!	#DIV/0!	#DIV/0!	#DIV/0!	0
						#DIV/0!		#DIV/0!															#DIV/0!	#DIV/0!	#DIV/0!	#DIV/0!	#DIV/0!	#DIV/0!	#DIV/0!	#DIV/0!	#DIV/0!	#DIV/0!	#DIV/0!	#DIV/0!	#DIV/0!	0	0	0	0	0	0	#DIV/0!	#DIV/0!	#DIV/0!	#DIV/0!	#DIV/0!	#DIV/0!	#DIV/0!	0
						#DIV/0!		#DIV/0!															#DIV/0!	#DIV/0!	#DIV/0!	#DIV/0!	#DIV/0!	#DIV/0!	#DIV/0!	#DIV/0!	#DIV/0!	#DIV/0!	#DIV/0!	#DIV/0!	#DIV/0!	0	0	0	0	0	0	#DIV/0!	#DIV/0!	#DIV/0!	#DIV/0!	#DIV/0!	#DIV/0!	#DIV/0!	0
						#DIV/0!		#DIV/0!															#DIV/0!	#DIV/0!	#DIV/0!	#DIV/0!	#DIV/0!	#DIV/0!	#DIV/0!	#DIV/0!	#DIV/0!	#DIV/0!	#DIV/0!	#DIV/0!	#DIV/0!	0	0	0	0	0	0	#DIV/0!	#DIV/0!	#DIV/0!	#DIV/0!	#DIV/0!	#DIV/0!	#DIV/0!	0
						#DIV/0!		#DIV/0!															#DIV/0!	#DIV/0!	#DIV/0!	#DIV/0!	#DIV/0!	#DIV/0!	#DIV/0!	#DIV/0!	#DIV/0!	#DIV/0!	#DIV/0!	#DIV/0!	#DIV/0!	0	0	0	0	0	0	#DIV/0!	#DIV/0!	#DIV/0!	#DIV/0!	#DIV/0!	#DIV/0!	#DIV/0!	0
						#DIV/0!		#DIV/0!															#DIV/0!	#DIV/0!	#DIV/0!	#DIV/0!	#DIV/0!	#DIV/0!	#DIV/0!	#DIV/0!	#DIV/0!	#DIV/0!	#DIV/0!	#DIV/0!	#DIV/0!	0	0	0	0	0	0	#DIV/0!	#DIV/0!	#DIV/0!	#DIV/0!	#DIV/0!	#DIV/0!	#DIV/0!	0
						#DIV/0!		#DIV/0!															#DIV/0!	#DIV/0!	#DIV/0!	#DIV/0!	#DIV/0!	#DIV/0!	#DIV/0!	#DIV/0!	#DIV/0!	#DIV/0!	#DIV/0!	#DIV/0!	#DIV/0!	0	0	0	0	0	0	#DIV/0!	#DIV/0!	#DIV/0!	#DIV/0!	#DIV/0!	#DIV/0!	#DIV/0!	0
						#DIV/0!		#DIV/0!
						#DIV/0!		#DIV/0!
						#DIV/0!		#DIV/0!
						#DIV/0!		#DIV/0!
						#DIV/0!		#DIV/0!
						#DIV/0!		#DIV/0!
						#DIV/0!		#DIV/0!
						#DIV/0!		#DIV/0!
						#DIV/0!		#DIV/0!
						#DIV/0!		#DIV/0!
						#DIV/0!		#DIV/0!
						#DIV/0!		#DIV/0!
						#DIV/0!		#DIV/0!
						#DIV/0!		#DIV/0!
						#DIV/0!		#DIV/0!
						#DIV/0!		#DIV/0!
						#DIV/0!		#DIV/0!
						#DIV/0!		#DIV/0!
						#DIV/0!		#DIV/0!
						#DIV/0!		#DIV/0!
						#DIV/0!		#DIV/0!
						#DIV/0!		#DIV/0!
						#DIV/0!		#DIV/0!
						#DIV/0!		#DIV/0!
						#DIV/0!		#DIV/0!
						#DIV/0!		#DIV/0!
						#DIV/0!		#DIV/0!
						#DIV/0!		#DIV/0!
						#DIV/0!		#DIV/0!
						#DIV/0!		#DIV/0!
						#DIV/0!		#DIV/0!
						#DIV/0!		#DIV/0!
						#DIV/0!		#DIV/0!
						#DIV/0!		#DIV/0!
						#DIV/0!		#DIV/0!
						#DIV/0!		#DIV/0!
						#DIV/0!		#DIV/0!
						#DIV/0!		#DIV/0!
						#DIV/0!		#DIV/0!
						#DIV/0!		#DIV/0!
						#DIV/0!		#DIV/0!
						#DIV/0!		#DIV/0!
						#DIV/0!		#DIV/0!
						#DIV/0!		#DIV/0!
						#DIV/0!		#DIV/0!
						#DIV/0!		#DIV/0!
						#DIV/0!		#DIV/0!
						#DIV/0!		#DIV/0!
						#DIV/0!		#DIV/0!
						#DIV/0!		#DIV/0!
						#DIV/0!		#DIV/0!
						#DIV/0!		#DIV/0!
						#DIV/0!		#DIV/0!
						#DIV/0!		#DIV/0!
						#DIV/0!		#DIV/0!
						#DIV/0!		#DIV/0!
						#DIV/0!		#DIV/0!
						#DIV/0!		#DIV/0!
						#DIV/0!		#DIV/0!
						#DIV/0!		#DIV/0!
						#DIV/0!		#DIV/0!
						#DIV/0!		#DIV/0!
						#DIV/0!		#DIV/0!
						#DIV/0!		#DIV/0!
						#DIV/0!		#DIV/0!
						#DIV/0!		#DIV/0!
						#DIV/0!		#DIV/0!
						#DIV/0!		#DIV/0!
						#DIV/0!		#DIV/0!
						#DIV/0!		#DIV/0!
						#DIV/0!		#DIV/0!
						#DIV/0!		#DIV/0!
						#DIV/0!		#DIV/0!
						#DIV/0!		#DIV/0!
						#DIV/0!		#DIV/0!
						#DIV/0!		#DIV/0!
						#DIV/0!		#DIV/0!
						#DIV/0!		#DIV/0!
						#DIV/0!		#DIV/0!
[truncated: 33 more columns]

## Sheet: Site3
Date:	18/9/00
Site No. :	3V23
									Trans for Aca nig, Hip buc, Ere amo, Pte bre, Mae par, Dal mel, Cis cor, Col mop, Dic cin, Sec vir
			Width (m)	Length (m)	Area (ha)			Length (m)	Width (m)	Length (m)	Area (ha)
	Transect Dimensions:		10	50	0.05				25	50	0.125
	Co-ordinates:			X	Y			X		X	Y
			NW Corner						NW Corner
			SW Corner						SW Corner
			NE Corner						NE Corner
			SE Corner						SE Corner
									OED		OUD	NED		NUD	NFD	OFD	OBE	OBU	NBE	NBU	RE	Notes	Canopy volume (m3)																				Damage
Trans. No.	Sp. Code	Coppice	Height (m)	D1 (m)	D2 (m)	R	Shape	Adj. shape	Score	Eaten		Score	Eaten										Total	0.5	1	2	3	4	5	0.5	1	2	3	4	5	OED	OUD	NED	NUD	NFD	OFD	Old Rec. Vol.	OED	OUD	NED	NUD	NFD	OFD	Sp. Code
1	Gre mon	T	1.6	1.3	0.7	0.5	3	3															0.41846	0.282481	0.396393	0.424999	0.698796	1.83076	4.43388	0.282481	0.396393	0.41846	0.41846	0.41846	0.41846	0	0	0	0	0	0	0.41846	0	0	0	0	0	0	Gre mon
1	Gre mon	T	1.8	1.2	1.1	0.575	3	3															0.62259	0.388051	0.567932	0.623444	0.807061	1.75931	4.12071	0.388051	0.567932	0.62259	0.62259	0.62259	0.62259	0	0	0	0	0	0	0.62259	0	0	0	0	0	0	Gre mon
1	Aca nig	T	1	1.3	0.7	0.5	1	1			1												0.785398	0.392699	0.785398	1.5708	2.35619	3.14159	3.92699	0.392699	0.785398	0.785398	0.785398	0.785398	0.785398	0	5.5	0	0	0	0	0.831109	0	4.5711	0	0	0	0	Aca nig
1	Gre mon	T	2.5	1.8	1.2	0.75	3	3			3												1.47115	0.717921	1.15338	1.45938	1.48292	1.78892	2.9423	0.717921	1.15338	1.45938	1.47115	1.47115	1.47115	0	38	0	0	0	0	2.37282	0	90.1672	0	0	0	0	Gre mon
1	Gre mon	T	3	2.2	3.6	1.45	7	7			1												16.6167	3.3026	6.6052	13.1121	16.6167	11.0198	-9.95552	3.3026	6.6052	13.1121	16.6167	16.6167	16.6167	0	5.5	0	0	0	0	17.5838	0	96.7109	0	0	0	0	Gre mon
1	Hip buc	T	2.2	0.8	0.4	0.3	1	1														Browsed	0.622035	0.141372	0.282743	0.565487	0.84823	1.13097	1.41372	0.141372	0.282743	0.565487	0.622035	0.622035	0.622035	0	0	0	0	0	0	0.622035	0	0	0	0	0	0	Hip buc
1	Gre fla	T	1.8	4.2	1.8	1.5	1	1			1											Browsed	12.7235	3.53429	7.06858	14.1372	21.2058	28.2743	35.3429	3.53429	7.06858	12.7235	12.7235	12.7235	12.7235	0	5.5	0	0	0	0	13.464	0	74.0518	0	0	0	0	Gre fla
1	Gre fla	T	3	1.6	1.5	0.775	3	3			3											Browsed	1.88503	0.794157	1.3265	1.81522	1.88503	1.95485	2.44356	0.794157	1.3265	1.81522	1.88503	1.88503	1.88503	0	38	0	0	0	0	3.04037	0	115.534	0	0	0	0	Gre fla
1	Gre mon	T	1.9	1.8	1.7	0.875	3	3															1.52182	0.913004	1.36008	1.52204	1.81713	3.57658	8.13162	0.913004	1.36008	1.52182	1.52182	1.52182	1.52182	0	0	0	0	0	0	1.52182	0	0	0	0	0	0	Gre mon
1	Gre fla	T	1.8	2.5	2.4	1.225	3	3			1											Browsed	2.82578	1.76127	2.5777	2.82966	3.66305	7.98507	18.7029	1.76127	2.5777	2.82578	2.82578	2.82578	2.82578	0	5.5	0	0	0	0	2.99025	0	16.4464	0	0	0	0	Gre fla
1	Pte bre	T	0.1	0.2	0.1	0.075	1	1			6												0.00176715	0.00883573	0.0176715	0.0353429	0.0530144	0.0706858	0.0883573	0.00176715	0.00176715	0.00176715	0.00176715	0.00176715	0.00176715	0	95	0	0	0	0	0.0353429	0	3.35758	0	0	0	0	Pte bre
1	Ere amo	T	0.8	0.8	0.7	0.375	1	1														Browsed	0.353429	0.220893	0.441786	0.883573	1.32536	1.76715	2.20893	0.220893	0.353429	0.353429	0.353429	0.353429	0.353429	0	0	0	0	0	0	0.353429	0	0	0	0	0	0	Ere amo
1	Gre mon	T	2.3	1.5	1.5	0.75	3	3			2												1.35346	0.704705	1.10906	1.35045	1.39161	1.89998	3.54299	0.704705	1.10906	1.35045	1.35346	1.35346	1.35346	0	18	0	0	0	0	1.65056	0	29.71	0	0	0	0	Gre mon
1	Gre mon	T	1.5	1.1	1.2	0.575	3	3			5												0.518825	0.365099	0.499609	0.538041	1.03765	2.92079	7.10983	0.365099	0.499609	0.518825	0.518825	0.518825	0.518825	0	83	0	0	0	0	3.05191	0	253.309	0	0	0	0	Gre mon
1	Gre mon	T	1.4	0.9	0.9	0.45	3	3			2												0.296584	0.21779	0.289666	0.31993	0.739297	2.19628	5.33937	0.21779	0.289666	0.296584	0.296584	0.296584	0.296584	0	18	0	0	0	0	0.361687	0	6.51037	0	0	0	0	Gre mon
1	Gre mon	T	1.3	1.4	1.2	0.65	3	3			1												0.574598	0.440691	0.567537	0.664305	1.85953	5.72244	13.8223	0.440691	0.567537	0.574598	0.574598	0.574598	0.574598	0	5.5	0	0	0	0	0.60804	0	3.34422	0	0	0	0	Gre mon
1	Gre mon	T	2.5	0.8	0.5	0.325	3	3								3							0.276249	0.13481	0.216579	0.274039	0.278459	0.335919	0.552498	0.13481	0.216579	0.274039	0.276249	0.276249	0.276249	0	0	0	0	0	38	0.445563	0	0	0	0	0	16.9314	Gre mon
1	Gre mon	T	2.8	2.6	1.4	1	3	3			2												2.92922	1.30569	2.15101	2.8609	2.93029	3.1598	4.35006	1.30569	2.15101	2.8609	2.92922	2.92922	2.92922	0	18	0	0	0	0	3.57222	0	64.3	0	0	0	0	Gre mon
1	Gre mon	T	2.6	2	1.9	0.975	3	3			2					2							2.58569	1.22326	1.98311	2.55391	2.59511	2.98937	4.61941	1.22326	1.98311	2.55391	2.58569	2.58569	2.58569	0	18	0	0	0	18	4.04014	0	72.7226	0	0	0	72.7226	Gre mon
1	Gre mon	T	1.4	1.5	1.2	0.675	3	3			1												0.667313	0.490028	0.651749	0.719842	1.66342	4.94162	12.0136	0.490028	0.651749	0.667313	0.667313	0.667313	0.667313	0	5.5	0	0	0	0	0.706151	0	3.88383	0	0	0	0	Gre mon
1	Pte bre	T	0.4	0.9	0.6	0.375	1	1			1												0.176715	0.220893	0.441786	0.883573	1.32536	1.76715	2.20893	0.176715	0.176715	0.176715	0.176715	0.176715	0.176715	0	5.5	0	0	0	0	0.187	0	1.0285	0	0	0	0	Pte bre
1	Gre mon	T	1.9	1.2	1.2	0.6	3	3								1							0.715567	0.429298	0.639514	0.715671	0.854424	1.68172	3.82352	0.429298	0.639514	0.715567	0.715567	0.715567	0.715567	0	0	0	0	0	5.5	0.757214	0	0	0	0	0	4.16467	Gre mon
1	Gre mon	T	1.6	1	0.6	0.4	3	3								2							0.267814	0.180788	0.253691	0.271999	0.447229	1.17169	2.83768	0.180788	0.253691	0.267814	0.267814	0.267814	0.267814	0	0	0	0	0	18	0.326603	0	0	0	0	0	5.87885	Gre mon
1	Gre mon	T	1.3	0.4	0.3	0.175	3	3								2							0.0416499	0.0319436	0.041138	0.0481523	0.134789	0.414792	1.00191	0.0319436	0.041138	0.0416499	0.0416499	0.0416499	0.0416499	0	0	0	0	0	18	0.0507925	0	0	0	0	0	0.914265	Gre mon
1	Gre mon	T	2	1	0.8	0.45	3	3			2												0.423691	0.244946	0.37073	0.423691	0.476652	0.847382	1.85365	0.244946	0.37073	0.423691	0.423691	0.423691	0.423691	0	18	0	0	0	0	0.516696	0	9.30053	0	0	0	0	Gre mon
1	Gre mon	T	2.3	1.1	0.8	0.475	3	3			3												0.542887	0.282665	0.444857	0.541682	0.558191	0.762103	1.42113	0.282665	0.444857	0.541682	0.542887	0.542887	0.542887	0	38	0	0	0	0	0.875624	0	33.2737	0	0	0	0	Gre mon
1	Gre mon	T	1.4	0.9	0.8	0.425	3	3															0.264545	0.194263	0.258375	0.28537	0.659435	1.95902	4.76259	0.194263	0.258375	0.264545	0.264545	0.264545	0.264545	0	0	0	0	0	0	0.264545	0	0	0	0	0	0	Gre mon
1	Gre mon	T	1.4	0.9	0.7	0.4	3	3								2							0.234338	0.172081	0.228872	0.252784	0.584136	1.73533	4.21876	0.172081	0.228872	0.234338	0.234338	0.234338	0.234338	0	0	0	0	0	18	0.285778	0	0	0	0	0	5.144	Gre mon
1	Col mop	T	0.7	0.5	0.5	0.25	1	1															0.137445	0.0981748	0.19635	0.392699	0.589049	0.785398	0.981748	0.0981748	0.137445	0.137445	0.137445	0.137445	0.137445	0	0	0	0	0	0	0.137445	0	0	0	0	0	0	Col mop
1	Gre mon	T	1.8	1.3	0.4	0.425	3	3								1							0.34013	0.211998	0.310269	0.340596	0.440909	0.961134	2.2512	0.211998	0.310269	0.34013	0.34013	0.34013	0.34013	0	0	0	0	0	5.5	0.359926	0	0	0	0	0	1.97959	Gre mon
1	Pte bre	T	0.6	0.3	0.1	0.1	1	1			6												0.0188496	0.015708	0.0314159	0.0628319	0.0942478	0.125664	0.15708	0.015708	0.0188496	0.0188496	0.0188496	0.0188496	0.0188496	0	95	0	0	0	0	0.376991	0	35.8142	0	0	0	0	Pte bre
1	Gre mon	T	1.2	1	0.9	0.475	3	3								2							0.283245	0.227022	0.281934	0.36717	1.2392	3.88151	9.27759	0.227022	0.281934	0.283245	0.283245	0.283245	0.283245	0	0	0	0	0	18	0.345421	0	0	0	0	0	6.21758	Gre mon
1	Col mop	T	0.3	0.3	0.2	0.125	1	1															0.0147262	0.0245437	0.0490874	0.0981748	0.147262	0.19635	0.245437	0.0147262	0.0147262	0.0147262	0.0147262	0.0147262	0.0147262	0	0	0	0	0	0	0.0147262	0	0	0	0	0	0	Col mop
1	Gre mon	T	1.6	2.4	1.3	0.925	3	3			1												1.43218	0.966791	1.35665	1.45456	2.39163	6.26579	15.175	0.966791	1.35665	1.43218	1.43218	1.43218	1.43218	0	5.5	0	0	0	0	1.51553	0	8.33544	0	0	0	0	Gre mon
1	Col mop	T	0.3	0.2	0.1	0.075	1	1															0.00530144	0.00883573	0.0176715	0.0353429	0.0530144	0.0706858	0.0883573	0.00530144	0.00530144	0.00530144	0.00530144	0.00530144	0.00530144	0	0	0	0	0	0	0.00530144	0	0	0	0	0	0	Col mop
1	Cis cor	T	0.9	0.7	0.4	0.275	1	1			1												0.213825	0.118791	0.237583	0.475166	0.712749	0.950332	1.18791	0.118791	0.213825	0.213825	0.213825	0.213825	0.213825	0	5.5	0	0	0	0	0.226269	0	1.24448	0	0	0	0	Cis cor
1	Mae par	T	0.1	0.4	0.2	0.15	1	1															0.00706858	0.0353429	0.0706858	0.141372	0.212058	0.282743	0.353429	0.00706858	0.00706858	0.00706858	0.00706858	0.00706858	0.00706858	0	0	0	0	0	0	0.00706858	0	0	0	0	0	0	Mae par
1	Col mop	T	0.1	0.1	0.1	0.05	1	1															0.000785398	0.00392699	0.00785398	0.015708	0.0235619	0.0314159	0.0392699	0.000785398	0.000785398	0.000785398	0.000785398	0.000785398	0.000785398	0	0	0	0	0	0	0.000785398	0	0	0	0	0	0	Col mop
1	Dal mel	T	0.5	0.5	0.3	0.2	1	1														Browsed	0.0628319	0.0628319	0.125664	0.251327	0.376991	0.502655	0.628319	0.0628319	0.0628319	0.0628319	0.0628319	0.0628319	0.0628319	0	0	0	0	0	0	0.0628319	0	0	0	0	0	0	Dal mel
1	Dal mel	T	0.2	0.2	0.1	0.075	1	1			5											Browsed	0.00353429	0.00883573	0.0176715	0.0353429	0.0530144	0.0706858	0.0883573	0.00353429	0.00353429	0.00353429	0.00353429	0.00353429	0.00353429	0	83	0	0	0	0	0.02079	0	1.72557	0	0	0	0	Dal mel
1	Cis cor	T	1	1.2	1	0.55	1	1			1												0.950332	0.475166	0.950332	1.90066	2.851	3.80133	4.75166	0.475166	0.950332	0.950332	0.950332	0.950332	0.950332	0	5.5	0	0	0	0	1.00564	0	5.53103	0	0	0	0	Cis cor
1	Dal mel	T	0.9	0.6	0.4	0.25	1	1															0.176715	0.0981748	0.19635	0.392699	0.589049	0.785398	0.981748	0.0981748	0.176715	0.176715	0.176715	0.176715	0.176715	0	0	0	0	0	0	0.176715	0	0	0	0	0	0	Dal mel
1	Cis cor	T	0.5	0.6	0.1	0.175	1	1															0.0481056	0.0481056	0.0962113	0.192423	0.288634	0.384845	0.481056	0.0481056	0.0481056	0.0481056	0.0481056	0.0481056	0.0481056	0	0	0	0	0	0	0.0481056	0	0	0	0	0	0	Cis cor
1	Gre fla	T	1.3	1.2	0.7	0.475	3	3								2							0.306849	0.235339	0.303078	0.354755	0.993034	3.05592	7.38141	0.235339	0.303078	0.306849	0.306849	0.306849	0.306849	0	0	0	0	0	18	0.374206	0	0	0	0	0	6.73571	Gre fla
1	Gre bic	T	2.4	1.6	1.4	0.75	3	3			2											Browsed	1.4123	0.711566	1.13197	1.40576	1.43437	1.83076	3.20792	0.711566	1.13197	1.40576	1.4123	1.4123	1.4123	0	18	0	0	0	0	1.72232	0	31.0018	0	0	0	0	Gre bic
1	Pte bre	T	1.3	1.2	0.8	0.5	3	3			1												0.339999	0.260764	0.33582	0.39308	1.10031	3.38606	8.17885	0.260764	0.33582	0.339999	0.339999	0.339999	0.339999	0	5.5	0	0	0	0	0.359787	0	1.97883	0	0	0	0	Pte bre
1	Gre mon	T	2.1	1.6	2.2	0.95	7	7								2							5.05447	1.41764	2.83529	5.0257	1.87679	-12.8844	-45.5347	1.41764	2.83529	5.0257	5.05447	5.05447	5.05447	0	0	0	0	0	18	6.16398	0	0	0	0	0	110.952	Gre mon
1	Gre mon	T	2.2	1.4	1.7	0.775	3	3								2							1.38236	0.744536	1.15802	1.38132	1.44883	2.13949	4.23223	0.744536	1.15802	1.38132	1.38236	1.38236	1.38236	0	0	0	0	0	18	1.6858	0	0	0	0	0	30.3444	Gre mon
1	Gre mon	T	2.1	2.2	1.9	1.025	3	3	2							2							2.30813	1.28728	1.97641	2.30789	2.48982	4.01761	8.38665	1.28728	1.97641	2.30789	2.30813	2.30813	2.30813	18	0	0	0	0	18	3.60646	64.9163	0	0	0	0	64.9163	Gre mon
1	Gre mon	T	1.8	0.8	0.9	0.425	3	3								3							0.34013	0.211998	0.310269	0.340596	0.440909	0.961134	2.2512	0.211998	0.310269	0.34013	0.34013	0.34013	0.34013	0	0	0	0	0	38	0.548596	0	0	0	0	0	20.8467	Gre mon
1	Gre mon	T	2.1	1.5	1	0.625	3	3								1							0.85817	0.478615	0.734833	0.858078	0.925723	1.49376	3.11818	0.478615	0.734833	0.858078	0.85817	0.85817	0.85817	0	0	0	0	0	5.5	0.908117	0	0	0	0	0	4.99464	Gre mon
1	Gre mon	T	1.8	1.3	1	0.575	3	3								2							0.62259	0.388051	0.567932	0.623444	0.807061	1.75931	4.12071	0.388051	0.567932	0.62259	0.62259	0.62259	0.62259	0	0	0	0	0	18	0.759256	0	0	0	0	0	13.6666	Gre mon
1	Gre mon	T	1.8	1.5	1.2	0.675	3	3								3							0.857974	0.534763	0.782651	0.859151	1.11219	2.42445	5.67863	0.534763	0.782651	0.857974	0.857974	0.857974	0.857974	0	0	0	0	0	38	1.38383	0	0	0	0	0	52.5855	Gre mon
1	Gre mon	T	1.1	0.6	0.9	0.375	1	1								4							0.485965	0.220893	0.441786	0.883573	1.32536	1.76715	2.20893	0.220893	0.441786	0.485965	0.485965	0.485965	0.485965	0	0	0	0	0	63	1.31342	0	0	0	0	0	82.7454	Gre mon
1	Gre mon	T	1.6	0.9	0.9	0.45	3	3								3							0.338953	0.22881	0.321078	0.344249	0.566025	1.48292	3.59144	0.22881	0.321078	0.338953	0.338953	0.338953	0.338953	0	0	0	0	0	38	0.546698	0	0	0	0	0	20.7745	Gre mon
1	Gre mon	T	2	1.2	1	0.55	3	3								2							0.632921	0.365907	0.553806	0.632921	0.712036	1.26584	2.76903	0.365907	0.553806	0.632921	0.632921	0.632921	0.632921	0	0	0	0	0	18	0.771855	0	0	0	0	0	13.8934	Gre mon
1	Gre mon	T	1.8	1.5	1.3	0.7	3	3								2							0.922705	0.575108	0.841699	0.92397	1.1961	2.60737	6.10706	0.575108	0.841699	0.922705	0.922705	0.922705	0.922705	0	0	0	0	0	18	1.12525	0	0	0	0	0	20.2545	Gre mon
1	Gre fla	T	1.6	1.3	2.2	0.875	3	3								2							1.28153	0.865098	1.21395	1.30156	2.14006	5.60671	13.5788	0.865098	1.21395	1.28153	1.28153	1.28153	1.28153	0	0	0	0	0	18	1.56285	0	0	0	0	0	28.1312	Gre fla
1	Mae par	T	0.8	1.7	1	0.675	1	1															1.14511	0.715694	1.43139	2.86278	4.29416	5.72555	7.15694	0.715694	1.14511	1.14511	1.14511	1.14511	1.14511	0	0	0	0	0	0	1.14511	0	0	0	0	0	0	Mae par
2	Col mop	T	0.1	0.2	0.1	0.075	1	1								1							0.00176715	0.00883573	0.0176715	0.0353429	0.0530144	0.0706858	0.0883573	0.00176715	0.00176715	0.00176715	0.00176715	0.00176715	0.00176715	0	0	0	0	0	5.5	0.00187	0	0	0	0	0	0.010285	Col mop
2	Col mop	T	1.4	0.8	1.4	0.55	1	1								1							1.33046	0.475166	0.950332	1.90066	2.851	3.80133	4.75166	0.475166	0.950332	1.33046	1.33046	1.33046	1.33046	0	0	0	0	0	5.5	1.4079	0	0	0	0	0	7.74344	Col mop
2	Col mop	T	1.5	0.6	0.7	0.325	1	1								1							0.497746	0.165915	0.331831	0.663661	0.995492	1.32732	1.65915	0.165915	0.331831	0.497746	0.497746	0.497746	0.497746	0	0	0	0	0	5.5	0.526715	0	0	0	0	0	2.89693	Col mop
2	Col mop	T	1	0.5	0.5	0.25	1	1								6							0.19635	0.0981748	0.19635	0.392699	0.589049	0.785398	0.981748	0.0981748	0.19635	0.19635	0.19635	0.19635	0.19635	0	0	0	0	0	95	3.92699	0	0	0	0	0	373.064	Col mop
2	Dic cin	T	0.3	0.7	0.9	0.4	1	1														Browsed	0.150796	0.251327	0.502655	1.00531	1.50796	2.01062	2.51327	0.150796	0.150796	0.150796	0.150796	0.150796	0.150796	0	0	0	0	0	0	0.150796	0	0	0	0	0	0	Dic cin
2	Dal mel	T	0.6	0.3	0.7	0.25	1	1															0.11781	0.0981748	0.19635	0.392699	0.589049	0.785398	0.981748	0.0981748	0.11781	0.11781	0.11781	0.11781	0.11781	0	0	0	0	0	0	0.11781	0	0	0	0	0	0	Dal mel
2	Col mop	T	0.2	0.2	0.1	0.075	1	1														Browsed	0.00353429	0.00883573	0.0176715	0.0353429	0.0530144	0.0706858	0.0883573	0.00353429	0.00353429	0.00353429	0.00353429	0.00353429	0.00353429	0	0	0	0	0	0	0.00353429	0	0	0	0	0	0	Col mop
2	Sec vir	T	0.9	1.4	0.6	0.5	3	3														Browsed	0.235384	0.214719	0.235707	0.665145	3.22563	9.85448	22.489	0.214719	0.235384	0.235384	0.235384	0.235384	0.235384	0	0	0	0	0	0	0.235384	0	0	0	0	0	0	Sec vir
2	Dal mel	T	0.9	0.2	0.1	0.075	1	1															0.0159043	0.00883573	0.0176715	0.0353429	0.0530144	0.0706858	0.0883573	0.00883573	0.0159043	0.0159043	0.0159043	0.0159043	0.0159043	0	0	0	0	0	0	0.0159043	0	0	0	0	0	0	Dal mel
2	Pte bre	T	0.7	0.5	0.6	0.275	1	1			3												0.166308	0.118791	0.237583	0.475166	0.712749	0.950332	1.18791	0.118791	0.166308	0.166308	0.166308	0.166308	0.166308	0	38	0	0	0	0	0.268239	0	10.1931	0	0	0	0	Pte bre
2	Pte bre	T	0.3	0.2	0.1	0.075	1	1			6												0.00530144	0.00883573	0.0176715	0.0353429	0.0530144	0.0706858	0.0883573	0.00530144	0.00530144	0.00530144	0.00530144	0.00530144	0.00530144	0	95	0	0	0	0	0.106029	0	10.0727	0	0	0	0	Pte bre
2	Pte bre	T	0.3	0.9	0.7	0.4	1	1			3												0.150796	0.251327	0.502655	1.00531	1.50796	2.01062	2.51327	0.150796	0.150796	0.150796	0.150796	0.150796	0.150796	0	38	0	0	0	0	0.24322	0	9.24236	0	0	0	0	Pte bre
2	Pte bre	T	0.2	0.5	0.3	0.2	1	1			5												0.0251327	0.0628319	0.125664	0.251327	0.376991	0.502655	0.628319	0.0251327	0.0251327	0.0251327	0.0251327	0.0251327	0.0251327	0	83	0	0	0	0	0.14784	0	12.2707	0	0	0	0	Pte bre
2	Col mop	T	1.2	0.7	0.9	0.4	3	3								1							0.200861	0.160991	0.199931	0.260375	0.878766	2.75254	6.57912	0.160991	0.199931	0.200861	0.200861	0.200861	0.200861	0	0	0	0	0	5.5	0.212551	0	0	0	0	0	1.16903	Col mop
2	Cis cor	T	1.3	1.8	1.6	0.85	1	1			1												2.95074	1.1349	2.2698	4.5396	6.8094	9.0792	11.349	1.1349	2.2698	2.95074	2.95074	2.95074	2.95074	0	5.5	0	0	0	0	3.12248	0	17.1736	0	0	0	0	Cis cor
2	Dic cin	T	0.7	0.2	0.1	0.075	1	1								4							0.01237	0.00883573	0.0176715	0.0353429	0.0530144	0.0706858	0.0883573	0.00883573	0.01237	0.01237	0.01237	0.01237	0.01237	0	0	0	0	0	63	0.0334325	0	0	0	0	0	2.10625	Dic cin
2	Mae par	T	0.2	0.3	0.1	0.1	1	1															0.00628319	0.015708	0.0314159	0.0628319	0.0942478	0.125664	0.15708	0.00628319	0.00628319	0.00628319	0.00628319	0.00628319	0.00628319	0	0	0	0	0	0	0.00628319	0	0	0	0	0	0	Mae par
2	Sp 10	T	1	1	0.4	0.35	1	1														Browsed	0.384845	0.192423	0.384845	0.76969	1.15454	1.53938	1.92423	0.192423	0.384845	0.384845	0.384845	0.384845	0.384845	0	0	0	0	0	0	0.384845	0	0	0	0	0	0	Sp 10
2	Sp 10	T	0.2	0.4	0.5	0.225	1	1															0.0318086	0.0795216	0.159043	0.318086	0.477129	0.636173	0.795216	0.0318086	0.0318086	0.0318086	0.0318086	0.0318086	0.0318086	0	0	0	0	0	0	0.0318086	0	0	0	0	0	0	Sp 10
2	Dal mel	T	0.8	0.4	0.5	0.225	1	1															0.127235	0.0795216	0.159043	0.318086	0.477129	0.636173	0.795216	0.0795216	0.127235	0.127235	0.127235	0.127235	0.127235	0	0	0	0	0	0	0.127235	0	0	0	0	0	0	Dal mel
2	Col mop	T	0.2	0.2	0.2	0.1	1	1															0.00628319	0.015708	0.0314159	0.0628319	0.0942478	0.125664	0.15708	0.00628319	0.00628319	0.00628319	0.00628319	0.00628319	0.00628319	0	0	0	0	0	0	0.00628319	0	0	0	0	0	0	Col mop
2	Pte bre	T	0.2	1.2	0.2	0.35	1	1			6												0.076969	0.192423	0.384845	0.76969	1.15454	1.53938	1.92423	0.076969	0.076969	0.076969	0.076969	0.076969	0.076969	0	95	0	0	0	0	1.53938	0	146.241	0	0	0	0	Pte bre
						#DIV/0!		#DIV/0!															#DIV/0!	#DIV/0!	#DIV/0!	#DIV/0!	#DIV/0!	#DIV/0!	#DIV/0!	#DIV/0!	#DIV/0!	#DIV/0!	#DIV/0!	#DIV/0!	#DIV/0!	0	0	0	0	0	0	#DIV/0!	#DIV/0!	#DIV/0!	#DIV/0!	#DIV/0!	#DIV/0!	#DIV/0!	0
						#DIV/0!		#DIV/0!															#DIV/0!	#DIV/0!	#DIV/0!	#DIV/0!	#DIV/0!	#DIV/0!	#DIV/0!	#DIV/0!	#DIV/0!	#DIV/0!	#DIV/0!	#DIV/0!	#DIV/0!	0	0	0	0	0	0	#DIV/0!	#DIV/0!	#DIV/0!	#DIV/0!	#DIV/0!	#DIV/0!	#DIV/0!	0
						#DIV/0!		#DIV/0!															#DIV/0!	#DIV/0!	#DIV/0!	#DIV/0!	#DIV/0!	#DIV/0!	#DIV/0!	#DIV/0!	#DIV/0!	#DIV/0!	#DIV/0!	#DIV/0!	#DIV/0!	0	0	0	0	0	0	#DIV/0!	#DIV/0!	#DIV/0!	#DIV/0!	#DIV/0!	#DIV/0!	#DIV/0!	0
						#DIV/0!		#DIV/0!															#DIV/0!	#DIV/0!	#DIV/0!	#DIV/0!	#DIV/0!	#DIV/0!	#DIV/0!	#DIV/0!	#DIV/0!	#DIV/0!	#DIV/0!	#DIV/0!	#DIV/0!	0	0	0	0	0	0	#DIV/0!	#DIV/0!	#DIV/0!	#DIV/0!	#DIV/0!	#DIV/0!	#DIV/0!	0
						#DIV/0!		#DIV/0!															#DIV/0!	#DIV/0!	#DIV/0!	#DIV/0!	#DIV/0!	#DIV/0!	#DIV/0!	#DIV/0!	#DIV/0!	#DIV/0!	#DIV/0!	#DIV/0!	#DIV/0!	0	0	0	0	0	0	#DIV/0!	#DIV/0!	#DIV/0!	#DIV/0!	#DIV/0!	#DIV/0!	#DIV/0!	0
						#DIV/0!		#DIV/0!															#DIV/0!	#DIV/0!	#DIV/0!	#DIV/0!	#DIV/0!	#DIV/0!	#DIV/0!	#DIV/0!	#DIV/0!	#DIV/0!	#DIV/0!	#DIV/0!	#DIV/0!	0	0	0	0	0	0	#DIV/0!	#DIV/0!	#DIV/0!	#DIV/0!	#DIV/0!	#DIV/0!	#DIV/0!	0
						#DIV/0!		#DIV/0!															#DIV/0!	#DIV/0!	#DIV/0!	#DIV/0!	#DIV/0!	#DIV/0!	#DIV/0!	#DIV/0!	#DIV/0!	#DIV/0!	#DIV/0!	#DIV/0!	#DIV/0!	0	0	0	0	0	0	#DIV/0!	#DIV/0!	#DIV/0!	#DIV/0!	#DIV/0!	#DIV/0!	#DIV/0!	0
						#DIV/0!		#DIV/0!															#DIV/0!	#DIV/0!	#DIV/0!	#DIV/0!	#DIV/0!	#DIV/0!	#DIV/0!	#DIV/0!	#DIV/0!	#DIV/0!	#DIV/0!	#DIV/0!	#DIV/0!	0	0	0	0	0	0	#DIV/0!	#DIV/0!	#DIV/0!	#DIV/0!	#DIV/0!	#DIV/0!	#DIV/0!	0
						#DIV/0!		#DIV/0!															#DIV/0!	#DIV/0!	#DIV/0!	#DIV/0!	#DIV/0!	#DIV/0!	#DIV/0!	#DIV/0!	#DIV/0!	#DIV/0!	#DIV/0!	#DIV/0!	#DIV/0!	0	0	0	0	0	0	#DIV/0!	#DIV/0!	#DIV/0!	#DIV/0!	#DIV/0!	#DIV/0!	#DIV/0!	0
						#DIV/0!		#DIV/0!															#DIV/0!	#DIV/0!	#DIV/0!	#DIV/0!	#DIV/0!	#DIV/0!	#DIV/0!	#DIV/0!	#DIV/0!	#DIV/0!	#DIV/0!	#DIV/0!	#DIV/0!	0	0	0	0	0	0	#DIV/0!	#DIV/0!	#DIV/0!	#DIV/0!	#DIV/0!	#DIV/0!	#DIV/0!	0
						#DIV/0!		#DIV/0!															#DIV/0!	#DIV/0!	#DIV/0!	#DIV/0!	#DIV/0!	#DIV/0!	#DIV/0!	#DIV/0!	#DIV/0!	#DIV/0!	#DIV/0!	#DIV/0!	#DIV/0!	0	0	0	0	0	0	#DIV/0!	#DIV/0!	#DIV/0!	#DIV/0!	#DIV/0!	#DIV/0!	#DIV/0!	0
						#DIV/0!		#DIV/0!															#DIV/0!	#DIV/0!	#DIV/0!	#DIV/0!	#DIV/0!	#DIV/0!	#DIV/0!	#DIV/0!	#DIV/0!	#DIV/0!	#DIV/0!	#DIV/0!	#DIV/0!	0	0	0	0	0	0	#DIV/0!	#DIV/0!	#DIV/0!	#DIV/0!	#DIV/0!	#DIV/0!	#DIV/0!	0
						#DIV/0!		#DIV/0!															#DIV/0!	#DIV/0!	#DIV/0!	#DIV/0!	#DIV/0!	#DIV/0!	#DIV/0!	#DIV/0!	#DIV/0!	#DIV/0!	#DIV/0!	#DIV/0!	#DIV/0!	0	0	0	0	0	0	#DIV/0!	#DIV/0!	#DIV/0!	#DIV/0!	#DIV/0!	#DIV/0!	#DIV/0!	0
						#DIV/0!		#DIV/0!															#DIV/0!	#DIV/0!	#DIV/0!	#DIV/0!	#DIV/0!	#DIV/0!	#DIV/0!	#DIV/0!	#DIV/0!	#DIV/0!	#DIV/0!	#DIV/0!	#DIV/0!	0	0	0	0	0	0	#DIV/0!	#DIV/0!	#DIV/0!	#DIV/0!	#DIV/0!	#DIV/0!	#DIV/0!	0
						#DIV/0!		#DIV/0!															#DIV/0!	#DIV/0!	#DIV/0!	#DIV/0!	#DIV/0!	#DIV/0!	#DIV/0!	#DIV/0!	#DIV/0!	#DIV/0!	#DIV/0!	#DIV/0!	#DIV/0!	0	0	0	0	0	0	#DIV/0!	#DIV/0!	#DIV/0!	#DIV/0!	#DIV/0!	#DIV/0!	#DIV/0!	0
						#DIV/0!		#DIV/0!															#DIV/0!	#DIV/0!	#DIV/0!	#DIV/0!	#DIV/0!	#DIV/0!	#DIV/0!	#DIV/0!	#DIV/0!	#DIV/0!	#DIV/0!	#DIV/0!	#DIV/0!	0	0	0	0	0	0	#DIV/0!	#DIV/0!	#DIV/0!	#DIV/0!	#DIV/0!	#DIV/0!	#DIV/0!	0
						#DIV/0!		#DIV/0!															#DIV/0!	#DIV/0!	#DIV/0!	#DIV/0!	#DIV/0!	#DIV/0!	#DIV/0!	#DIV/0!	#DIV/0!	#DIV/0!	#DIV/0!	#DIV/0!	#DIV/0!	0	0	0	0	0	0	#DIV/0!	#DIV/0!	#DIV/0!	#DIV/0!	#DIV/0!	#DIV/0!	#DIV/0!	0
						#DIV/0!		#DIV/0!															#DIV/0!	#DIV/0!	#DIV/0!	#DIV/0!	#DIV/0!	#DIV/0!	#DIV/0!	#DIV/0!	#DIV/0!	#DIV/0!	#DIV/0!	#DIV/0!	#DIV/0!	0	0	0	0	0	0	#DIV/0!	#DIV/0!	#DIV/0!	#DIV/0!	#DIV/0!	#DIV/0!	#DIV/0!	0
						#DIV/0!		#DIV/0!															#DIV/0!	#DIV/0!	#DIV/0!	#DIV/0!	#DIV/0!	#DIV/0!	#DIV/0!	#DIV/0!	#DIV/0!	#DIV/0!	#DIV/0!	#DIV/0!	#DIV/0!	0	0	0	0	0	0	#DIV/0!	#DIV/0!	#DIV/0!	#DIV/0!	#DIV/0!	#DIV/0!	#DIV/0!	0
						#DIV/0!		#DIV/0!															#DIV/0!	#DIV/0!	#DIV/0!	#DIV/0!	#DIV/0!	#DIV/0!	#DIV/0!	#DIV/0!	#DIV/0!	#DIV/0!	#DIV/0!	#DIV/0!	#DIV/0!	0	0	0	0	0	0	#DIV/0!	#DIV/0!	#DIV/0!	#DIV/0!	#DIV/0!	#DIV/0!	#DIV/0!	0
						#DIV/0!		#DIV/0!															#DIV/0!	#DIV/0!	#DIV/0!	#DIV/0!	#DIV/0!	#DIV/0!	#DIV/0!	#DIV/0!	#DIV/0!	#DIV/0!	#DIV/0!	#DIV/0!	#DIV/0!	0	0	0	0	0	0	#DIV/0!	#DIV/0!	#DIV/0!	#DIV/0!	#DIV/0!	#DIV/0!	#DIV/0!	0
						#DIV/0!		#DIV/0!															#DIV/0!	#DIV/0!	#DIV/0!	#DIV/0!	#DIV/0!	#DIV/0!	#DIV/0!	#DIV/0!	#DIV/0!	#DIV/0!	#DIV/0!	#DIV/0!	#DIV/0!	0	0	0	0	0	0	#DIV/0!	#DIV/0!	#DIV/0!	#DIV/0!	#DIV/0!	#DIV/0!	#DIV/0!	0
						#DIV/0!		#DIV/0!															#DIV/0!	#DIV/0!	#DIV/0!	#DIV/0!	#DIV/0!	#DIV/0!	#DIV/0!	#DIV/0!	#DIV/0!	#DIV/0!	#DIV/0!	#DIV/0!	#DIV/0!	0	0	0	0	0	0	#DIV/0!	#DIV/0!	#DIV/0!	#DIV/0!	#DIV/0!	#DIV/0!	#DIV/0!	0
						#DIV/0!		#DIV/0!															#DIV/0!	#DIV/0!	#DIV/0!	#DIV/0!	#DIV/0!	#DIV/0!	#DIV/0!	#DIV/0!	#DIV/0!	#DIV/0!	#DIV/0!	#DIV/0!	#DIV/0!	0	0	0	0	0	0	#DIV/0!	#DIV/0!	#DIV/0!	#DIV/0!	#DIV/0!	#DIV/0!	#DIV/0!	0
						#DIV/0!		#DIV/0!															#DIV/0!	#DIV/0!	#DIV/0!	#DIV/0!	#DIV/0!	#DIV/0!	#DIV/0!	#DIV/0!	#DIV/0!	#DIV/0!	#DIV/0!	#DIV/0!	#DIV/0!	0	0	0	0	0	0	#DIV/0!	#DIV/0!	#DIV/0!	#DIV/0!	#DIV/0!	#DIV/0!	#DIV/0!	0
						#DIV/0!		#DIV/0!															#DIV/0!	#DIV/0!	#DIV/0!	#DIV/0!	#DIV/0!	#DIV/0!	#DIV/0!	#DIV/0!	#DIV/0!	#DIV/0!	#DIV/0!	#DIV/0!	#DIV/0!	0	0	0	0	0	0	#DIV/0!	#DIV/0!	#DIV/0!	#DIV/0!	#DIV/0!	#DIV/0!	#DIV/0!	0
						#DIV/0!		#DIV/0!															#DIV/0!	#DIV/0!	#DIV/0!	#DIV/0!	#DIV/0!	#DIV/0!	#DIV/0!	#DIV/0!	#DIV/0!	#DIV/0!	#DIV/0!	#DIV/0!	#DIV/0!	0	0	0	0	0	0	#DIV/0!	#DIV/0!	#DIV/0!	#DIV/0!	#DIV/0!	#DIV/0!	#DIV/0!	0
						#DIV/0!		#DIV/0!															#DIV/0!	#DIV/0!	#DIV/0!	#DIV/0!	#DIV/0!	#DIV/0!	#DIV/0!	#DIV/0!	#DIV/0!	#DIV/0!	#DIV/0!	#DIV/0!	#DIV/0!	0	0	0	0	0	0	#DIV/0!	#DIV/0!	#DIV/0!	#DIV/0!	#DIV/0!	#DIV/0!	#DIV/0!	0
						#DIV/0!		#DIV/0!															#DIV/0!	#DIV/0!	#DIV/0!	#DIV/0!	#DIV/0!	#DIV/0!	#DIV/0!	#DIV/0!	#DIV/0!	#DIV/0!	#DIV/0!	#DIV/0!	#DIV/0!	0	0	0	0	0	0	#DIV/0!	#DIV/0!	#DIV/0!	#DIV/0!	#DIV/0!	#DIV/0!	#DIV/0!	0
						#DIV/0!		#DIV/0!															#DIV/0!	#DIV/0!	#DIV/0!	#DIV/0!	#DIV/0!	#DIV/0!	#DIV/0!	#DIV/0!	#DIV/0!	#DIV/0!	#DIV/0!	#DIV/0!	#DIV/0!	0	0	0	0	0	0	#DIV/0!	#DIV/0!	#DIV/0!	#DIV/0!	#DIV/0!	#DIV/0!	#DIV/0!	0
						#DIV/0!		#DIV/0!															#DIV/0!	#DIV/0!	#DIV/0!	#DIV/0!	#DIV/0!	#DIV/0!	#DIV/0!	#DIV/0!	#DIV/0!	#DIV/0!	#DIV/0!	#DIV/0!	#DIV/0!	0	0	0	0	0	0	#DIV/0!	#DIV/0!	#DIV/0!	#DIV/0!	#DIV/0!	#DIV/0!	#DIV/0!	0
						#DIV/0!		#DIV/0!															#DIV/0!	#DIV/0!	#DIV/0!	#DIV/0!	#DIV/0!	#DIV/0!	#DIV/0!	#DIV/0!	#DIV/0!	#DIV/0!	#DIV/0!	#DIV/0!	#DIV/0!	0	0	0	0	0	0	#DIV/0!	#DIV/0!	#DIV/0!	#DIV/0!	#DIV/0!	#DIV/0!	#DIV/0!	0
						#DIV/0!		#DIV/0!															#DIV/0!	#DIV/0!	#DIV/0!	#DIV/0!	#DIV/0!	#DIV/0!	#DIV/0!	#DIV/0!	#DIV/0!	#DIV/0!	#DIV/0!	#DIV/0!	#DIV/0!	0	0	0	0	0	0	#DIV/0!	#DIV/0!	#DIV/0!	#DIV/0!	#DIV/0!	#DIV/0!	#DIV/0!	0
						#DIV/0!		#DIV/0!															#DIV/0!	#DIV/0!	#DIV/0!	#DIV/0!	#DIV/0!	#DIV/0!	#DIV/0!	#DIV/0!	#DIV/0!	#DIV/0!	#DIV/0!	#DIV/0!	#DIV/0!	0	0	0	0	0	0	#DIV/0!	#DIV/0!	#DIV/0!	#DIV/0!	#DIV/0!	#DIV/0!	#DIV/0!	0
						#DIV/0!		#DIV/0!															#DIV/0!	#DIV/0!	#DIV/0!	#DIV/0!	#DIV/0!	#DIV/0!	#DIV/0!	#DIV/0!	#DIV/0!	#DIV/0!	#DIV/0!	#DIV/0!	#DIV/0!	0	0	0	0	0	0	#DIV/0!	#DIV/0!	#DIV/0!	#DIV/0!	#DIV/0!	#DIV/0!	#DIV/0!	0
						#DIV/0!		#DIV/0!															#DIV/0!	#DIV/0!	#DIV/0!	#DIV/0!	#DIV/0!	#DIV/0!	#DIV/0!	#DIV/0!	#DIV/0!	#DIV/0!	#DIV/0!	#DIV/0!	#DIV/0!	0	0	0	0	0	0	#DIV/0!	#DIV/0!	#DIV/0!	#DIV/0!	#DIV/0!	#DIV/0!	#DIV/0!	0
						#DIV/0!		#DIV/0!															#DIV/0!	#DIV/0!	#DIV/0!	#DIV/0!	#DIV/0!	#DIV/0!	#DIV/0!	#DIV/0!	#DIV/0!	#DIV/0!	#DIV/0!	#DIV/0!	#DIV/0!	0	0	0	0	0	0	#DIV/0!	#DIV/0!	#DIV/0!	#DIV/0!	#DIV/0!	#DIV/0!	#DIV/0!	0
						#DIV/0!		#DIV/0!															#DIV/0!	#DIV/0!	#DIV/0!	#DIV/0!	#DIV/0!	#DIV/0!	#DIV/0!	#DIV/0!	#DIV/0!	#DIV/0!	#DIV/0!	#DIV/0!	#DIV/0!	0	0	0	0	0	0	#DIV/0!	#DIV/0!	#DIV/0!	#DIV/0!	#DIV/0!	#DIV/0!	#DIV/0!	0
						#DIV/0!		#DIV/0!															#DIV/0!	#DIV/0!	#DIV/0!	#DIV/0!	#DIV/0!	#DIV/0!	#DIV/0!	#DIV/0!	#DIV/0!	#DIV/0!	#DIV/0!	#DIV/0!	#DIV/0!	0	0	0	0	0	0	#DIV/0!	#DIV/0!	#DIV/0!	#DIV/0!	#DIV/0!	#DIV/0!	#DIV/0!	0
						#DIV/0!		#DIV/0!															#DIV/0!	#DIV/0!	#DIV/0!	#DIV/0!	#DIV/0!	#DIV/0!	#DIV/0!	#DIV/0!	#DIV/0!	#DIV/0!	#DIV/0!	#DIV/0!	#DIV/0!	0	0	0	0	0	0	#DIV/0!	#DIV/0!	#DIV/0!	#DIV/0!	#DIV/0!	#DIV/0!	#DIV/0!	0
						#DIV/0!		#DIV/0!															#DIV/0!	#DIV/0!	#DIV/0!	#DIV/0!	#DIV/0!	#DIV/0!	#DIV/0!	#DIV/0!	#DIV/0!	#DIV/0!	#DIV/0!	#DIV/0!	#DIV/0!	0	0	0	0	0	0	#DIV/0!	#DIV/0!	#DIV/0!	#DIV/0!	#DIV/0!	#DIV/0!	#DIV/0!	0
						#DIV/0!		#DIV/0!															#DIV/0!	#DIV/0!	#DIV/0!	#DIV/0!	#DIV/0!	#DIV/0!	#DIV/0!	#DIV/0!	#DIV/0!	#DIV/0!	#DIV/0!	#DIV/0!	#DIV/0!	0	0	0	0	0	0	#DIV/0!	#DIV/0!	#DIV/0!	#DIV/0!	#DIV/0!	#DIV/0!	#DIV/0!	0
						#DIV/0!		#DIV/0!															#DIV/0!	#DIV/0!	#DIV/0!	#DIV/0!	#DIV/0!	#DIV/0!	#DIV/0!	#DIV/0!	#DIV/0!	#DIV/0!	#DIV/0!	#DIV/0!	#DIV/0!	0	0	0	0	0	0	#DIV/0!	#DIV/0!	#DIV/0!	#DIV/0!	#DIV/0!	#DIV/0!	#DIV/0!	0
						#DIV/0!		#DIV/0!															#DIV/0!	#DIV/0!	#DIV/0!	#DIV/0!	#DIV/0!	#DIV/0!	#DIV/0!	#DIV/0!	#DIV/0!	#DIV/0!	#DIV/0!	#DIV/0!	#DIV/0!	0	0	0	0	0	0	#DIV/0!	#DIV/0!	#DIV/0!	#DIV/0!	#DIV/0!	#DIV/0!	#DIV/0!	0
						#DIV/0!		#DIV/0!															#DIV/0!	#DIV/0!	#DIV/0!	#DIV/0!	#DIV/0!	#DIV/0!	#DIV/0!	#DIV/0!	#DIV/0!	#DIV/0!	#DIV/0!	#DIV/0!	#DIV/0!	0	0	0	0	0	0	#DIV/0!	#DIV/0!	#DIV/0!	#DIV/0!	#DIV/0!	#DIV/0!	#DIV/0!	0
						#DIV/0!		#DIV/0!															#DIV/0!	#DIV/0!	#DIV/0!	#DIV/0!	#DIV/0!	#DIV/0!	#DIV/0!	#DIV/0!	#DIV/0!	#DIV/0!	#DIV/0!	#DIV/0!	#DIV/0!	0	0	0	0	0	0	#DIV/0!	#DIV/0!	#DIV/0!	#DIV/0!	#DIV/0!	#DIV/0!	#DIV/0!	0
						#DIV/0!		#DIV/0!															#DIV/0!	#DIV/0!	#DIV/0!	#DIV/0!	#DIV/0!	#DIV/0!	#DIV/0!	#DIV/0!	#DIV/0!	#DIV/0!	#DIV/0!	#DIV/0!	#DIV/0!	0	0	0	0	0	0	#DIV/0!	#DIV/0!	#DIV/0!	#DIV/0!	#DIV/0!	#DIV/0!	#DIV/0!	0
						#DIV/0!		#DIV/0!															#DIV/0!	#DIV/0!	#DIV/0!	#DIV/0!	#DIV/0!	#DIV/0!	#DIV/0!	#DIV/0!	#DIV/0!	#DIV/0!	#DIV/0!	#DIV/0!	#DIV/0!	0	0	0	0	0	0	#DIV/0!	#DIV/0!	#DIV/0!	#DIV/0!	#DIV/0!	#DIV/0!	#DIV/0!	0
						#DIV/0!		#DIV/0!															#DIV/0!	#DIV/0!	#DIV/0!	#DIV/0!	#DIV/0!	#DIV/0!	#DIV/0!	#DIV/0!	#DIV/0!	#DIV/0!	#DIV/0!	#DIV/0!	#DIV/0!	0	0	0	0	0	0	#DIV/0!	#DIV/0!	#DIV/0!	#DIV/0!	#DIV/0!	#DIV/0!	#DIV/0!	0
						#DIV/0!		#DIV/0!															#DIV/0!	#DIV/0!	#DIV/0!	#DIV/0!	#DIV/0!	#DIV/0!	#DIV/0!	#DIV/0!	#DIV/0!	#DIV/0!	#DIV/0!	#DIV/0!	#DIV/0!	0	0	0	0	0	0	#DIV/0!	#DIV/0!	#DIV/0!	#DIV/0!	#DIV/0!	#DIV/0!	#DIV/0!	0
						#DIV/0!		#DIV/0!															#DIV/0!	#DIV/0!	#DIV/0!	#DIV/0!	#DIV/0!	#DIV/0!	#DIV/0!	#DIV/0!	#DIV/0!	#DIV/0!	#DIV/0!	#DIV/0!	#DIV/0!	0	0	0	0	0	0	#DIV/0!	#DIV/0!	#DIV/0!	#DIV/0!	#DIV/0!	#DIV/0!	#DIV/0!	0
						#DIV/0!		#DIV/0!															#DIV/0!	#DIV/0!	#DIV/0!	#DIV/0!	#DIV/0!	#DIV/0!	#DIV/0!	#DIV/0!	#DIV/0!	#DIV/0!	#DIV/0!	#DIV/0!	#DIV/0!	0	0	0	0	0	0	#DIV/0!	#DIV/0!	#DIV/0!	#DIV/0!	#DIV/0!	#DIV/0!	#DIV/0!	0
						#DIV/0!		#DIV/0!															#DIV/0!	#DIV/0!	#DIV/0!	#DIV/0!	#DIV/0!	#DIV/0!	#DIV/0!	#DIV/0!	#DIV/0!	#DIV/0!	#DIV/0!	#DIV/0!	#DIV/0!	0	0	0	0	0	0	#DIV/0!	#DIV/0!	#DIV/0!	#DIV/0!	#DIV/0!	#DIV/0!	#DIV/0!	0
						#DIV/0!		#DIV/0!															#DIV/0!	#DIV/0!	#DIV/0!	#DIV/0!	#DIV/0!	#DIV/0!	#DIV/0!	#DIV/0!	#DIV/0!	#DIV/0!	#DIV/0!	#DIV/0!	#DIV/0!	0	0	0	0	0	0	#DIV/0!	#DIV/0!	#DIV/0!	#DIV/0!	#DIV/0!	#DIV/0!	#DIV/0!	0
						#DIV/0!		#DIV/0!															#DIV/0!	#DIV/0!	#DIV/0!	#DIV/0!	#DIV/0!	#DIV/0!	#DIV/0!	#DIV/0!	#DIV/0!	#DIV/0!	#DIV/0!	#DIV/0!	#DIV/0!	0	0	0	0	0	0	#DIV/0!	#DIV/0!	#DIV/0!	#DIV/0!	#DIV/0!	#DIV/0!	#DIV/0!	0
						#DIV/0!		#DIV/0!															#DIV/0!	#DIV/0!	#DIV/0!	#DIV/0!	#DIV/0!	#DIV/0!	#DIV/0!	#DIV/0!	#DIV/0!	#DIV/0!	#DIV/0!	#DIV/0!	#DIV/0!	0	0	0	0	0	0	#DIV/0!	#DIV/0!	#DIV/0!	#DIV/0!	#DIV/0!	#DIV/0!	#DIV/0!	0
						#DIV/0!		#DIV/0!															#DIV/0!	#DIV/0!	#DIV/0!	#DIV/0!	#DIV/0!	#DIV/0!	#DIV/0!	#DIV/0!	#DIV/0!	#DIV/0!	#DIV/0!	#DIV/0!	#DIV/0!	0	0	0	0	0	0	#DIV/0!	#DIV/0!	#DIV/0!	#DIV/0!	#DIV/0!	#DIV/0!	#DIV/0!	0
						#DIV/0!		#DIV/0!															#DIV/0!	#DIV/0!	#DIV/0!	#DIV/0!	#DIV/0!	#DIV/0!	#DIV/0!	#DIV/0!	#DIV/0!	#DIV/0!	#DIV/0!	#DIV/0!	#DIV/0!	0	0	0	0	0	0	#DIV/0!	#DIV/0!	#DIV/0!	#DIV/0!	#DIV/0!	#DIV/0!	#DIV/0!	0
						#DIV/0!		#DIV/0!															#DIV/0!	#DIV/0!	#DIV/0!	#DIV/0!	#DIV/0!	#DIV/0!	#DIV/0!	#DIV/0!	#DIV/0!	#DIV/0!	#DIV/0!	#DIV/0!	#DIV/0!	0	0	0	0	0	0	#DIV/0!	#DIV/0!	#DIV/0!	#DIV/0!	#DIV/0!	#DIV/0!	#DIV/0!	0
						#DIV/0!		#DIV/0!															#DIV/0!	#DIV/0!	#DIV/0!	#DIV/0!	#DIV/0!	#DIV/0!	#DIV/0!	#DIV/0!	#DIV/0!	#DIV/0!	#DIV/0!	#DIV/0!	#DIV/0!	0	0	0	0	0	0	#DIV/0!	#DIV/0!	#DIV/0!	#DIV/0!	#DIV/0!	#DIV/0!	#DIV/0!	0
						#DIV/0!		#DIV/0!															#DIV/0!	#DIV/0!	#DIV/0!	#DIV/0!	#DIV/0!	#DIV/0!	#DIV/0!	#DIV/0!	#DIV/0!	#DIV/0!	#DIV/0!	#DIV/0!	#DIV/0!	0	0	0	0	0	0	#DIV/0!	#DIV/0!	#DIV/0!	#DIV/0!	#DIV/0!	#DIV/0!	#DIV/0!	0
						#DIV/0!		#DIV/0!															#DIV/0!	#DIV/0!	#DIV/0!	#DIV/0!	#DIV/0!	#DIV/0!	#DIV/0!	#DIV/0!	#DIV/0!	#DIV/0!	#DIV/0!	#DIV/0!	#DIV/0!	0	0	0	0	0	0	#DIV/0!	#DIV/0!	#DIV/0!	#DIV/0!	#DIV/0!	#DIV/0!	#DIV/0!	0
						#DIV/0!		#DIV/0!															#DIV/0!	#DIV/0!	#DIV/0!	#DIV/0!	#DIV/0!	#DIV/0!	#DIV/0!	#DIV/0!	#DIV/0!	#DIV/0!	#DIV/0!	#DIV/0!	#DIV/0!	0	0	0	0	0	0	#DIV/0!	#DIV/0!	#DIV/0!	#DIV/0!	#DIV/0!	#DIV/0!	#DIV/0!	0
						#DIV/0!		#DIV/0!															#DIV/0!	#DIV/0!	#DIV/0!	#DIV/0!	#DIV/0!	#DIV/0!	#DIV/0!	#DIV/0!	#DIV/0!	#DIV/0!	#DIV/0!	#DIV/0!	#DIV/0!	0	0	0	0	0	0	#DIV/0!	#DIV/0!	#DIV/0!	#DIV/0!	#DIV/0!	#DIV/0!	#DIV/0!	0
						#DIV/0!		#DIV/0!															#DIV/0!	#DIV/0!	#DIV/0!	#DIV/0!	#DIV/0!	#DIV/0!	#DIV/0!	#DIV/0!	#DIV/0!	#DIV/0!	#DIV/0!	#DIV/0!	#DIV/0!	0	0	0	0	0	0	#DIV/0!	#DIV/0!	#DIV/0!	#DIV/0!	#DIV/0!	#DIV/0!	#DIV/0!	0
						#DIV/0!		#DIV/0!															#DIV/0!	#DIV/0!	#DIV/0!	#DIV/0!	#DIV/0!	#DIV/0!	#DIV/0!	#DIV/0!	#DIV/0!	#DIV/0!	#DIV/0!	#DIV/0!	#DIV/0!	0	0	0	0	0	0	#DIV/0!	#DIV/0!	#DIV/0!	#DIV/0!	#DIV/0!	#DIV/0!	#DIV/0!	0
						#DIV/0!		#DIV/0!															#DIV/0!	#DIV/0!	#DIV/0!	#DIV/0!	#DIV/0!	#DIV/0!	#DIV/0!	#DIV/0!	#DIV/0!	#DIV/0!	#DIV/0!	#DIV/0!	#DIV/0!	0	0	0	0	0	0	#DIV/0!	#DIV/0!	#DIV/0!	#DIV/0!	#DIV/0!	#DIV/0!	#DIV/0!	0
						#DIV/0!		#DIV/0!															#DIV/0!	#DIV/0!	#DIV/0!	#DIV/0!	#DIV/0!	#DIV/0!	#DIV/0!	#DIV/0!	#DIV/0!	#DIV/0!	#DIV/0!	#DIV/0!	#DIV/0!	0	0	0	0	0	0	#DIV/0!	#DIV/0!	#DIV/0!	#DIV/0!	#DIV/0!	#DIV/0!	#DIV/0!	0
						#DIV/0!		#DIV/0!															#DIV/0!	#DIV/0!	#DIV/0!	#DIV/0!	#DIV/0!	#DIV/0!	#DIV/0!	#DIV/0!	#DIV/0!	#DIV/0!	#DIV/0!	#DIV/0!	#DIV/0!	0	0	0	0	0	0	#DIV/0!	#DIV/0!	#DIV/0!	#DIV/0!	#DIV/0!	#DIV/0!	#DIV/0!	0
						#DIV/0!		#DIV/0!															#DIV/0!	#DIV/0!	#DIV/0!	#DIV/0!	#DIV/0!	#DIV/0!	#DIV/0!	#DIV/0!	#DIV/0!	#DIV/0!	#DIV/0!	#DIV/0!	#DIV/0!	0	0	0	0	0	0	#DIV/0!	#DIV/0!	#DIV/0!	#DIV/0!	#DIV/0!	#DIV/0!	#DIV/0!	0
						#DIV/0!		#DIV/0!															#DIV/0!	#DIV/0!	#DIV/0!	#DIV/0!	#DIV/0!	#DIV/0!	#DIV/0!	#DIV/0!	#DIV/0!	#DIV/0!	#DIV/0!	#DIV/0!	#DIV/0!	0	0	0	0	0	0	#DIV/0!	#DIV/0!	#DIV/0!	#DIV/0!	#DIV/0!	#DIV/0!	#DIV/0!	0
						#DIV/0!		#DIV/0!															#DIV/0!	#DIV/0!	#DIV/0!	#DIV/0!	#DIV/0!	#DIV/0!	#DIV/0!	#DIV/0!	#DIV/0!	#DIV/0!	#DIV/0!	#DIV/0!	#DIV/0!	0	0	0	0	0	0	#DIV/0!	#DIV/0!	#DIV/0!	#DIV/0!	#DIV/0!	#DIV/0!	#DIV/0!	0
						#DIV/0!		#DIV/0!															#DIV/0!	#DIV/0!	#DIV/0!	#DIV/0!	#DIV/0!	#DIV/0!	#DIV/0!	#DIV/0!	#DIV/0!	#DIV/0!	#DIV/0!	#DIV/0!	#DIV/0!	0	0	0	0	0	0	#DIV/0!	#DIV/0!	#DIV/0!	#DIV/0!	#DIV/0!	#DIV/0!	#DIV/0!	0
						#DIV/0!		#DIV/0!															#DIV/0!	#DIV/0!	#DIV/0!	#DIV/0!	#DIV/0!	#DIV/0!	#DIV/0!	#DIV/0!	#DIV/0!	#DIV/0!	#DIV/0!	#DIV/0!	#DIV/0!	0	0	0	0	0	0	#DIV/0!	#DIV/0!	#DIV/0!	#DIV/0!	#DIV/0!	#DIV/0!	#DIV/0!	0
						#DIV/0!		#DIV/0!															#DIV/0!	#DIV/0!	#DIV/0!	#DIV/0!	#DIV/0!	#DIV/0!	#DIV/0!	#DIV/0!	#DIV/0!	#DIV/0!	#DIV/0!	#DIV/0!	#DIV/0!	0	0	0	0	0	0	#DIV/0!	#DIV/0!	#DIV/0!	#DIV/0!	#DIV/0!	#DIV/0!	#DIV/0!	0
						#DIV/0!		#DIV/0!															#DIV/0!	#DIV/0!	#DIV/0!	#DIV/0!	#DIV/0!	#DIV/0!	#DIV/0!	#DIV/0!	#DIV/0!	#DIV/0!	#DIV/0!	#DIV/0!	#DIV/0!	0	0	0	0	0	0	#DIV/0!	#DIV/0!	#DIV/0!	#DIV/0!	#DIV/0!	#DIV/0!	#DIV/0!	0
						#DIV/0!		#DIV/0!															#DIV/0!	#DIV/0!	#DIV/0!	#DIV/0!	#DIV/0!	#DIV/0!	#DIV/0!	#DIV/0!	#DIV/0!	#DIV/0!	#DIV/0!	#DIV/0!	#DIV/0!	0	0	0	0	0	0	#DIV/0!	#DIV/0!	#DIV/0!	#DIV/0!	#DIV/0!	#DIV/0!	#DIV/0!	0
						#DIV/0!		#DIV/0!															#DIV/0!	#DIV/0!	#DIV/0!	#DIV/0!	#DIV/0!	#DIV/0!	#DIV/0!	#DIV/0!	#DIV/0!	#DIV/0!	#DIV/0!	#DIV/0!	#DIV/0!	0	0	0	0	0	0	#DIV/0!	#DIV/0!	#DIV/0!	#DIV/0!	#DIV/0!	#DIV/0!	#DIV/0!	0
						#DIV/0!		#DIV/0!															#DIV/0!	#DIV/0!	#DIV/0!	#DIV/0!	#DIV/0!	#DIV/0!	#DIV/0!	#DIV/0!	#DIV/0!	#DIV/0!	#DIV/0!	#DIV/0!	#DIV/0!	0	0	0	0	0	0	#DIV/0!	#DIV/0!	#DIV/0!	#DIV/0!	#DIV/0!	#DIV/0!	#DIV/0!	0
						#DIV/0!		#DIV/0!															#DIV/0!	#DIV/0!	#DIV/0!	#DIV/0!	#DIV/0!	#DIV/0!	#DIV/0!	#DIV/0!	#DIV/0!	#DIV/0!	#DIV/0!	#DIV/0!	#DIV/0!	0	0	0	0	0	0	#DIV/0!	#DIV/0!	#DIV/0!	#DIV/0!	#DIV/0!	#DIV/0!	#DIV/0!	0
						#DIV/0!		#DIV/0!															#DIV/0!	#DIV/0!	#DIV/0!	#DIV/0!	#DIV/0!	#DIV/0!	#DIV/0!	#DIV/0!	#DIV/0!	#DIV/0!	#DIV/0!	#DIV/0!	#DIV/0!	0	0	0	0	0	0	#DIV/0!	#DIV/0!	#DIV/0!	#DIV/0!	#DIV/0!	#DIV/0!	#DIV/0!	0
						#DIV/0!		#DIV/0!															#DIV/0!	#DIV/0!	#DIV/0!	#DIV/0!	#DIV/0!	#DIV/0!	#DIV/0!	#DIV/0!	#DIV/0!	#DIV/0!	#DIV/0!	#DIV/0!	#DIV/0!	0	0	0	0	0	0	#DIV/0!	#DIV/0!	#DIV/0!	#DIV/0!	#DIV/0!	#DIV/0!	#DIV/0!	0
						#DIV/0!		#DIV/0!															#DIV/0!	#DIV/0!	#DIV/0!	#DIV/0!	#DIV/0!	#DIV/0!	#DIV/0!	#DIV/0!	#DIV/0!	#DIV/0!	#DIV/0!	#DIV/0!	#DIV/0!	0	0	0	0	0	0	#DIV/0!	#DIV/0!	#DIV/0!	#DIV/0!	#DIV/0!	#DIV/0!	#DIV/0!	0
						#DIV/0!		#DIV/0!															#DIV/0!	#DIV/0!	#DIV/0!	#DIV/0!	#DIV/0!	#DIV/0!	#DIV/0!	#DIV/0!	#DIV/0!	#DIV/0!	#DIV/0!	#DIV/0!	#DIV/0!	0	0	0	0	0	0	#DIV/0!	#DIV/0!	#DIV/0!	#DIV/0!	#DIV/0!	#DIV/0!	#DIV/0!	0
						#DIV/0!		#DIV/0!															#DIV/0!	#DIV/0!	#DIV/0!	#DIV/0!	#DIV/0!	#DIV/0!	#DIV/0!	#DIV/0!	#DIV/0!	#DIV/0!	#DIV/0!	#DIV/0!	#DIV/0!	0	0	0	0	0	0	#DIV/0!	#DIV/0!	#DIV/0!	#DIV/0!	#DIV/0!	#DIV/0!	#DIV/0!	0
						#DIV/0!		#DIV/0!															#DIV/0!	#DIV/0!	#DIV/0!	#DIV/0!	#DIV/0!	#DIV/0!	#DIV/0!	#DIV/0!	#DIV/0!	#DIV/0!	#DIV/0!	#DIV/0!	#DIV/0!	0	0	0	0	0	0	#DIV/0!	#DIV/0!	#DIV/0!	#DIV/0!	#DIV/0!	#DIV/0!	#DIV/0!	0
						#DIV/0!		#DIV/0!															#DIV/0!	#DIV/0!	#DIV/0!	#DIV/0!	#DIV/0!	#DIV/0!	#DIV/0!	#DIV/0!	#DIV/0!	#DIV/0!	#DIV/0!	#DIV/0!	#DIV/0!	0	0	0	0	0	0	#DIV/0!	#DIV/0!	#DIV/0!	#DIV/0!	#DIV/0!	#DIV/0!	#DIV/0!	0
						#DIV/0!		#DIV/0!															#DIV/0!	#DIV/0!	#DIV/0!	#DIV/0!	#DIV/0!	#DIV/0!	#DIV/0!	#DIV/0!	#DIV/0!	#DIV/0!	#DIV/0!	#DIV/0!	#DIV/0!	0	0	0	0	0	0	#DIV/0!	#DIV/0!	#DIV/0!	#DIV/0!	#DIV/0!	#DIV/0!	#DIV/0!	0
						#DIV/0!		#DIV/0!															#DIV/0!	#DIV/0!	#DIV/0!	#DIV/0!	#DIV/0!	#DIV/0!	#DIV/0!	#DIV/0!	#DIV/0!	#DIV/0!	#DIV/0!	#DIV/0!	#DIV/0!	0	0	0	0	0	0	#DIV/0!	#DIV/0!	#DIV/0!	#DIV/0!	#DIV/0!	#DIV/0!	#DIV/0!	0
						#DIV/0!		#DIV/0!															#DIV/0!	#DIV/0!	#DIV/0!	#DIV/0!	#DIV/0!	#DIV/0!	#DIV/0!	#DIV/0!	#DIV/0!	#DIV/0!	#DIV/0!	#DIV/0!	#DIV/0!	0	0	0	0	0	0	#DIV/0!	#DIV/0!	#DIV/0!	#DIV/0!	#DIV/0!	#DIV/0!	#DIV/0!	0
						#DIV/0!		#DIV/0!															#DIV/0!	#DIV/0!	#DIV/0!	#DIV/0!	#DIV/0!	#DIV/0!	#DIV/0!	#DIV/0!	#DIV/0!	#DIV/0!	#DIV/0!	#DIV/0!	#DIV/0!	0	0	0	0	0	0	#DIV/0!	#DIV/0!	#DIV/0!	#DIV/0!	#DIV/0!	#DIV/0!	#DIV/0!	0
						#DIV/0!		#DIV/0!															#DIV/0!	#DIV/0!	#DIV/0!	#DIV/0!	#DIV/0!	#DIV/0!	#DIV/0!	#DIV/0!	#DIV/0!	#DIV/0!	#DIV/0!	#DIV/0!	#DIV/0!	0	0	0	0	0	0	#DIV/0!	#DIV/0!	#DIV/0!	#DIV/0!	#DIV/0!	#DIV/0!	#DIV/0!	0
						#DIV/0!		#DIV/0!															#DIV/0!	#DIV/0!	#DIV/0!	#DIV/0!	#DIV/0!	#DIV/0!	#DIV/0!	#DIV/0!	#DIV/0!	#DIV/0!	#DIV/0!	#DIV/0!	#DIV/0!	0	0	0	0	0	0	#DIV/0!	#DIV/0!	#DIV/0!	#DIV/0!	#DIV/0!	#DIV/0!	#DIV/0!	0
						#DIV/0!		#DIV/0!															#DIV/0!	#DIV/0!	#DIV/0!	#DIV/0!	#DIV/0!	#DIV/0!	#DIV/0!	#DIV/0!	#DIV/0!	#DIV/0!	#DIV/0!	#DIV/0!	#DIV/0!	0	0	0	0	0	0	#DIV/0!	#DIV/0!	#DIV/0!	#DIV/0!	#DIV/0!	#DIV/0!	#DIV/0!	0
						#DIV/0!		#DIV/0!															#DIV/0!	#DIV/0!	#DIV/0!	#DIV/0!	#DIV/0!	#DIV/0!	#DIV/0!	#DIV/0!	#DIV/0!	#DIV/0!	#DIV/0!	#DIV/0!	#DIV/0!	0	0	0	0	0	0	#DIV/0!	#DIV/0!	#DIV/0!	#DIV/0!	#DIV/0!	#DIV/0!	#DIV/0!	0
						#DIV/0!		#DIV/0!															#DIV/0!	#DIV/0!	#DIV/0!	#DIV/0!	#DIV/0!	#DIV/0!	#DIV/0!	#DIV/0!	#DIV/0!	#DIV/0!	#DIV/0!	#DIV/0!	#DIV/0!	0	0	0	0	0	0	#DIV/0!	#DIV/0!	#DIV/0!	#DIV/0!	#DIV/0!	#DIV/0!	#DIV/0!	0
						#DIV/0!		#DIV/0!															#DIV/0!	#DIV/0!	#DIV/0!	#DIV/0!	#DIV/0!	#DIV/0!	#DIV/0!	#DIV/0!	#DIV/0!	#DIV/0!	#DIV/0!	#DIV/0!	#DIV/0!	0	0	0	0	0	0	#DIV/0!	#DIV/0!	#DIV/0!	#DIV/0!	#DIV/0!	#DIV/0!	#DIV/0!	0
						#DIV/0!		#DIV/0!															#DIV/0!	#DIV/0!	#DIV/0!	#DIV/0!	#DIV/0!	#DIV/0!	#DIV/0!	#DIV/0!	#DIV/0!	#DIV/0!	#DIV/0!	#DIV/0!	#DIV/0!	0	0	0	0	0	0	#DIV/0!	#DIV/0!	#DIV/0!	#DIV/0!	#DIV/0!	#DIV/0!	#DIV/0!	0
						#DIV/0!		#DIV/0!															#DIV/0!	#DIV/0!	#DIV/0!	#DIV/0!	#DIV/0!	#DIV/0!	#DIV/0!	#DIV/0!	#DIV/0!	#DIV/0!	#DIV/0!	#DIV/0!	#DIV/0!	0	0	0	0	0	0	#DIV/0!	#DIV/0!	#DIV/0!	#DIV/0!	#DIV/0!	#DIV/0!	#DIV/0!	0
						#DIV/0!		#DIV/0!															#DIV/0!	#DIV/0!	#DIV/0!	#DIV/0!	#DIV/0!	#DIV/0!	#DIV/0!	#DIV/0!	#DIV/0!	#DIV/0!	#DIV/0!	#DIV/0!	#DIV/0!	0	0	0	0	0	0	#DIV/0!	#DIV/0!	#DIV/0!	#DIV/0!	#DIV/0!	#DIV/0!	#DIV/0!	0
						#DIV/0!		#DIV/0!															#DIV/0!	#DIV/0!	#DIV/0!	#DIV/0!	#DIV/0!	#DIV/0!	#DIV/0!	#DIV/0!	#DIV/0!	#DIV/0!	#DIV/0!	#DIV/0!	#DIV/0!	0	0	0	0	0	0	#DIV/0!	#DIV/0!	#DIV/0!	#DIV/0!	#DIV/0!	#DIV/0!	#DIV/0!	0
						#DIV/0!		#DIV/0!															#DIV/0!	#DIV/0!	#DIV/0!	#DIV/0!	#DIV/0!	#DIV/0!	#DIV/0!	#DIV/0!	#DIV/0!	#DIV/0!	#DIV/0!	#DIV/0!	#DIV/0!	0	0	0	0	0	0	#DIV/0!	#DIV/0!	#DIV/0!	#DIV/0!	#DIV/0!	#DIV/0!	#DIV/0!	0
						#DIV/0!		#DIV/0!															#DIV/0!	#DIV/0!	#DIV/0!	#DIV/0!	#DIV/0!	#DIV/0!	#DIV/0!	#DIV/0!	#DIV/0!	#DIV/0!	#DIV/0!	#DIV/0!	#DIV/0!	0	0	0	0	0	0	#DIV/0!	#DIV/0!	#DIV/0!	#DIV/0!	#DIV/0!	#DIV/0!	#DIV/0!	0
						#DIV/0!		#DIV/0!															#DIV/0!	#DIV/0!	#DIV/0!	#DIV/0!	#DIV/0!	#DIV/0!	#DIV/0!	#DIV/0!	#DIV/0!	#DIV/0!	#DIV/0!	#DIV/0!	#DIV/0!	0	0	0	0	0	0	#DIV/0!	#DIV/0!	#DIV/0!	#DIV/0!	#DIV/0!	#DIV/0!	#DIV/0!	0
						#DIV/0!		#DIV/0!															#DIV/0!	#DIV/0!	#DIV/0!	#DIV/0!	#DIV/0!	#DIV/0!	#DIV/0!	#DIV/0!	#DIV/0!	#DIV/0!	#DIV/0!	#DIV/0!	#DIV/0!	0	0	0	0	0	0	#DIV/0!	#DIV/0!	#DIV/0!	#DIV/0!	#DIV/0!	#DIV/0!	#DIV/0!	0
						#DIV/0!		#DIV/0!															#DIV/0!	#DIV/0!	#DIV/0!	#DIV/0!	#DIV/0!	#DIV/0!	#DIV/0!	#DIV/0!	#DIV/0!	#DIV/0!	#DIV/0!	#DIV/0!	#DIV/0!	0	0	0	0	0	0	#DIV/0!	#DIV/0!	#DIV/0!	#DIV/0!	#DIV/0!	#DIV/0!	#DIV/0!	0
						#DIV/0!		#DIV/0!															#DIV/0!	#DIV/0!	#DIV/0!	#DIV/0!	#DIV/0!	#DIV/0!	#DIV/0!	#DIV/0!	#DIV/0!	#DIV/0!	#DIV/0!	#DIV/0!	#DIV/0!	0	0	0	0	0	0	#DIV/0!	#DIV/0!	#DIV/0!	#DIV/0!	#DIV/0!	#DIV/0!	#DIV/0!	0
						#DIV/0!		#DIV/0!															#DIV/0!	#DIV/0!	#DIV/0!	#DIV/0!	#DIV/0!	#DIV/0!	#DIV/0!	#DIV/0!	#DIV/0!	#DIV/0!	#DIV/0!	#DIV/0!	#DIV/0!	0	0	0	0	0	0	#DIV/0!	#DIV/0!	#DIV/0!	#DIV/0!	#DIV/0!	#DIV/0!	#DIV/0!	0
						#DIV/0!		#DIV/0!															#DIV/0!	#DIV/0!	#DIV/0!	#DIV/0!	#DIV/0!	#DIV/0!	#DIV/0!	#DIV/0!	#DIV/0!	#DIV/0!	#DIV/0!	#DIV/0!	#DIV/0!	0	0	0	0	0	0	#DIV/0!	#DIV/0!	#DIV/0!	#DIV/0!	#DIV/0!	#DIV/0!	#DIV/0!	0
						#DIV/0!		#DIV/0!															#DIV/0!	#DIV/0!	#DIV/0!	#DIV/0!	#DIV/0!	#DIV/0!	#DIV/0!	#DIV/0!	#DIV/0!	#DIV/0!	#DIV/0!	#DIV/0!	#DIV/0!	0	0	0	0	0	0	#DIV/0!	#DIV/0!	#DIV/0!	#DIV/0!	#DIV/0!	#DIV/0!	#DIV/0!	0
						#DIV/0!		#DIV/0!															#DIV/0!	#DIV/0!	#DIV/0!	#DIV/0!	#DIV/0!	#DIV/0!	#DIV/0!	#DIV/0!	#DIV/0!	#DIV/0!	#DIV/0!	#DIV/0!	#DIV/0!	0	0	0	0	0	0	#DIV/0!	#DIV/0!	#DIV/0!	#DIV/0!	#DIV/0!	#DIV/0!	#DIV/0!	0
						#DIV/0!		#DIV/0!															#DIV/0!	#DIV/0!	#DIV/0!	#DIV/0!	#DIV/0!	#DIV/0!	#DIV/0!	#DIV/0!	#DIV/0!	#DIV/0!	#DIV/0!	#DIV/0!	#DIV/0!	0	0	0	0	0	0	#DIV/0!	#DIV/0!	#DIV/0!	#DIV/0!	#DIV/0!	#DIV/0!	#DIV/0!	0
						#DIV/0!		#DIV/0!															#DIV/0!	#DIV/0!	#DIV/0!	#DIV/0!	#DIV/0!	#DIV/0!	#DIV/0!	#DIV/0!	#DIV/0!	#DIV/0!	#DIV/0!	#DIV/0!	#DIV/0!	0	0	0	0	0	0	#DIV/0!	#DIV/0!	#DIV/0!	#DIV/0!	#DIV/0!	#DIV/0!	#DIV/0!	0
						#DIV/0!		#DIV/0!															#DIV/0!	#DIV/0!	#DIV/0!	#DIV/0!	#DIV/0!	#DIV/0!	#DIV/0!	#DIV/0!	#DIV/0!	#DIV/0!	#DIV/0!	#DIV/0!	#DIV/0!	0	0	0	0	0	0	#DIV/0!	#DIV/0!	#DIV/0!	#DIV/0!	#DIV/0!	#DIV/0!	#DIV/0!	0
						#DIV/0!		#DIV/0!															#DIV/0!	#DIV/0!	#DIV/0!	#DIV/0!	#DIV/0!	#DIV/0!	#DIV/0!	#DIV/0!	#DIV/0!	#DIV/0!	#DIV/0!	#DIV/0!	#DIV/0!	0	0	0	0	0	0	#DIV/0!	#DIV/0!	#DIV/0!	#DIV/0!	#DIV/0!	#DIV/0!	#DIV/0!	0
						#DIV/0!		#DIV/0!															#DIV/0!	#DIV/0!	#DIV/0!	#DIV/0!	#DIV/0!	#DIV/0!	#DIV/0!	#DIV/0!	#DIV/0!	#DIV/0!	#DIV/0!	#DIV/0!	#DIV/0!	0	0	0	0	0	0	#DIV/0!	#DIV/0!	#DIV/0!	#DIV/0!	#DIV/0!	#DIV/0!	#DIV/0!	0
						#DIV/0!		#DIV/0!															#DIV/0!	#DIV/0!	#DIV/0!	#DIV/0!	#DIV/0!	#DIV/0!	#DIV/0!	#DIV/0!	#DIV/0!	#DIV/0!	#DIV/0!	#DIV/0!	#DIV/0!	0	0	0	0	0	0	#DIV/0!	#DIV/0!	#DIV/0!	#DIV/0!	#DIV/0!	#DIV/0!	#DIV/0!	0
						#DIV/0!		#DIV/0!															#DIV/0!	#DIV/0!	#DIV/0!	#DIV/0!	#DIV/0!	#DIV/0!	#DIV/0!	#DIV/0!	#DIV/0!	#DIV/0!	#DIV/0!	#DIV/0!	#DIV/0!	0	0	0	0	0	0	#DIV/0!	#DIV/0!	#DIV/0!	#DIV/0!	#DIV/0!	#DIV/0!	#DIV/0!	0
						#DIV/0!		#DIV/0!															#DIV/0!	#DIV/0!	#DIV/0!	#DIV/0!	#DIV/0!	#DIV/0!	#DIV/0!	#DIV/0!	#DIV/0!	#DIV/0!	#DIV/0!	#DIV/0!	#DIV/0!	0	0	0	0	0	0	#DIV/0!	#DIV/0!	#DIV/0!	#DIV/0!	#DIV/0!	#DIV/0!	#DIV/0!	0
						#DIV/0!		#DIV/0!															#DIV/0!	#DIV/0!	#DIV/0!	#DIV/0!	#DIV/0!	#DIV/0!	#DIV/0!	#DIV/0!	#DIV/0!	#DIV/0!	#DIV/0!	#DIV/0!	#DIV/0!	0	0	0	0	0	0	#DIV/0!	#DIV/0!	#DIV/0!	#DIV/0!	#DIV/0!	#DIV/0!	#DIV/0!	0
						#DIV/0!		#DIV/0!															#DIV/0!	#DIV/0!	#DIV/0!	#DIV/0!	#DIV/0!	#DIV/0!	#DIV/0!	#DIV/0!	#DIV/0!	#DIV/0!	#DIV/0!	#DIV/0!	#DIV/0!	0	0	0	0	0	0	#DIV/0!	#DIV/0!	#DIV/0!	#DIV/0!	#DIV/0!	#DIV/0!	#DIV/0!	0
						#DIV/0!		#DIV/0!															#DIV/0!	#DIV/0!	#DIV/0!	#DIV/0!	#DIV/0!	#DIV/0!	#DIV/0!	#DIV/0!	#DIV/0!	#DIV/0!	#DIV/0!	#DIV/0!	#DIV/0!	0	0	0	0	0	0	#DIV/0!	#DIV/0!	#DIV/0!	#DIV/0!	#DIV/0!	#DIV/0!	#DIV/0!	0
						#DIV/0!		#DIV/0!															#DIV/0!	#DIV/0!	#DIV/0!	#DIV/0!	#DIV/0!	#DIV/0!	#DIV/0!	#DIV/0!	#DIV/0!	#DIV/0!	#DIV/0!	#DIV/0!	#DIV/0!	0	0	0	0	0	0	#DIV/0!	#DIV/0!	#DIV/0!	#DIV/0!	#DIV/0!	#DIV/0!	#DIV/0!	0
						#DIV/0!		#DIV/0!															#DIV/0!	#DIV/0!	#DIV/0!	#DIV/0!	#DIV/0!	#DIV/0!	#DIV/0!	#DIV/0!	#DIV/0!	#DIV/0!	#DIV/0!	#DIV/0!	#DIV/0!	0	0	0	0	0	0	#DIV/0!	#DIV/0!	#DIV/0!	#DIV/0!	#DIV/0!	#DIV/0!	#DIV/0!	0
						#DIV/0!		#DIV/0!															#DIV/0!	#DIV/0!	#DIV/0!	#DIV/0!	#DIV/0!	#DIV/0!	#DIV/0!	#DIV/0!	#DIV/0!	#DIV/0!	#DIV/0!	#DIV/0!	#DIV/0!	0	0	0	0	0	0	#DIV/0!	#DIV/0!	#DIV/0!	#DIV/0!	#DIV/0!	#DIV/0!	#DIV/0!	0
						#DIV/0!		#DIV/0!															#DIV/0!	#DIV/0!	#DIV/0!	#DIV/0!	#DIV/0!	#DIV/0!	#DIV/0!	#DIV/0!	#DIV/0!	#DIV/0!	#DIV/0!	#DIV/0!	#DIV/0!	0	0	0	0	0	0	#DIV/0!	#DIV/0!	#DIV/0!	#DIV/0!	#DIV/0!	#DIV/0!	#DIV/0!	0
						#DIV/0!		#DIV/0!															#DIV/0!	#DIV/0!	#DIV/0!	#DIV/0!	#DIV/0!	#DIV/0!	#DIV/0!	#DIV/0!	#DIV/0!	#DIV/0!	#DIV/0!	#DIV/0!	#DIV/0!	0	0	0	0	0	0	#DIV/0!	#DIV/0!	#DIV/0!	#DIV/0!	#DIV/0!	#DIV/0!	#DIV/0!	0
						#DIV/0!		#DIV/0!															#DIV/0!	#DIV/0!	#DIV/0!	#DIV/0!	#DIV/0!	#DIV/0!	#DIV/0!	#DIV/0!	#DIV/0!	#DIV/0!	#DIV/0!	#DIV/0!	#DIV/0!	0	0	0	0	0	0	#DIV/0!	#DIV/0!	#DIV/0!	#DIV/0!	#DIV/0!	#DIV/0!	#DIV/0!	0
						#DIV/0!		#DIV/0!															#DIV/0!	#DIV/0!	#DIV/0!	#DIV/0!	#DIV/0!	#DIV/0!	#DIV/0!	#DIV/0!	#DIV/0!	#DIV/0!	#DIV/0!	#DIV/0!	#DIV/0!	0	0	0	0	0	0	#DIV/0!	#DIV/0!	#DIV/0!	#DIV/0!	#DIV/0!	#DIV/0!	#DIV/0!	0
						#DIV/0!		#DIV/0!															#DIV/0!	#DIV/0!	#DIV/0!	#DIV/0!	#DIV/0!	#DIV/0!	#DIV/0!	#DIV/0!	#DIV/0!	#DIV/0!	#DIV/0!	#DIV/0!	#DIV/0!	0	0	0	0	0	0	#DIV/0!	#DIV/0!	#DIV/0!	#DIV/0!	#DIV/0!	#DIV/0!	#DIV/0!	0
						#DIV/0!		#DIV/0!															#DIV/0!	#DIV/0!	#DIV/0!	#DIV/0!	#DIV/0!	#DIV/0!	#DIV/0!	#DIV/0!	#DIV/0!	#DIV/0!	#DIV/0!	#DIV/0!	#DIV/0!	0	0	0	0	0	0	#DIV/0!	#DIV/0!	#DIV/0!	#DIV/0!	#DIV/0!	#DIV/0!	#DIV/0!	0
						#DIV/0!		#DIV/0!															#DIV/0!	#DIV/0!	#DIV/0!	#DIV/0!	#DIV/0!	#DIV/0!	#DIV/0!	#DIV/0!	#DIV/0!	#DIV/0!	#DIV/0!	#DIV/0!	#DIV/0!	0	0	0	0	0	0	#DIV/0!	#DIV/0!	#DIV/0!	#DIV/0!	#DIV/0!	#DIV/0!	#DIV/0!	0
						#DIV/0!		#DIV/0!															#DIV/0!	#DIV/0!	#DIV/0!	#DIV/0!	#DIV/0!	#DIV/0!	#DIV/0!	#DIV/0!	#DIV/0!	#DIV/0!	#DIV/0!	#DIV/0!	#DIV/0!	0	0	0	0	0	0	#DIV/0!	#DIV/0!	#DIV/0!	#DIV/0!	#DIV/0!	#DIV/0!	#DIV/0!	0
						#DIV/0!		#DIV/0!															#DIV/0!	#DIV/0!	#DIV/0!	#DIV/0!	#DIV/0!	#DIV/0!	#DIV/0!	#DIV/0!	#DIV/0!	#DIV/0!	#DIV/0!	#DIV/0!	#DIV/0!	0	0	0	0	0	0	#DIV/0!	#DIV/0!	#DIV/0!	#DIV/0!	#DIV/0!	#DIV/0!	#DIV/0!	0
						#DIV/0!		#DIV/0!															#DIV/0!	#DIV/0!	#DIV/0!	#DIV/0!	#DIV/0!	#DIV/0!	#DIV/0!	#DIV/0!	#DIV/0!	#DIV/0!	#DIV/0!	#DIV/0!	#DIV/0!	0	0	0	0	0	0	#DIV/0!	#DIV/0!	#DIV/0!	#DIV/0!	#DIV/0!	#DIV/0!	#DIV/0!	0
						#DIV/0!		#DIV/0!															#DIV/0!	#DIV/0!	#DIV/0!	#DIV/0!	#DIV/0!	#DIV/0!	#DIV/0!	#DIV/0!	#DIV/0!	#DIV/0!	#DIV/0!	#DIV/0!	#DIV/0!	0	0	0	0	0	0	#DIV/0!	#DIV/0!	#DIV/0!	#DIV/0!	#DIV/0!	#DIV/0!	#DIV/0!	0
						#DIV/0!		#DIV/0!															#DIV/0!	#DIV/0!	#DIV/0!	#DIV/0!	#DIV/0!	#DIV/0!	#DIV/0!	#DIV/0!	#DIV/0!	#DIV/0!	#DIV/0!	#DIV/0!	#DIV/0!	0	0	0	0	0	0	#DIV/0!	#DIV/0!	#DIV/0!	#DIV/0!	#DIV/0!	#DIV/0!	#DIV/0!	0
						#DIV/0!		#DIV/0!															#DIV/0!	#DIV/0!	#DIV/0!	#DIV/0!	#DIV/0!	#DIV/0!	#DIV/0!	#DIV/0!	#DIV/0!	#DIV/0!	#DIV/0!	#DIV/0!	#DIV/0!	0	0	0	0	0	0	#DIV/0!	#DIV/0!	#DIV/0!	#DIV/0!	#DIV/0!	#DIV/0!	#DIV/0!	0
						#DIV/0!		#DIV/0!															#DIV/0!	#DIV/0!	#DIV/0!	#DIV/0!	#DIV/0!	#DIV/0!	#DIV/0!	#DIV/0!	#DIV/0!	#DIV/0!	#DIV/0!	#DIV/0!	#DIV/0!	0	0	0	0	0	0	#DIV/0!	#DIV/0!	#DIV/0!	#DIV/0!	#DIV/0!	#DIV/0!	#DIV/0!	0
						#DIV/0!		#DIV/0!															#DIV/0!	#DIV/0!	#DIV/0!	#DIV/0!	#DIV/0!	#DIV/0!	#DIV/0!	#DIV/0!	#DIV/0!	#DIV/0!	#DIV/0!	#DIV/0!	#DIV/0!	0	0	0	0	0	0	#DIV/0!	#DIV/0!	#DIV/0!	#DIV/0!	#DIV/0!	#DIV/0!	#DIV/0!	0
						#DIV/0!		#DIV/0!															#DIV/0!	#DIV/0!	#DIV/0!	#DIV/0!	#DIV/0!	#DIV/0!	#DIV/0!	#DIV/0!	#DIV/0!	#DIV/0!	#DIV/0!	#DIV/0!	#DIV/0!	0	0	0	0	0	0	#DIV/0!	#DIV/0!	#DIV/0!	#DIV/0!	#DIV/0!	#DIV/0!	#DIV/0!	0
						#DIV/0!		#DIV/0!															#DIV/0!	#DIV/0!	#DIV/0!	#DIV/0!	#DIV/0!	#DIV/0!	#DIV/0!	#DIV/0!	#DIV/0!	#DIV/0!	#DIV/0!	#DIV/0!	#DIV/0!	0	0	0	0	0	0	#DIV/0!	#DIV/0!	#DIV/0!	#DIV/0!	#DIV/0!	#DIV/0!	#DIV/0!	0
						#DIV/0!		#DIV/0!															#DIV/0!	#DIV/0!	#DIV/0!	#DIV/0!	#DIV/0!	#DIV/0!	#DIV/0!	#DIV/0!	#DIV/0!	#DIV/0!	#DIV/0!	#DIV/0!	#DIV/0!	0	0	0	0	0	0	#DIV/0!	#DIV/0!	#DIV/0!	#DIV/0!	#DIV/0!	#DIV/0!	#DIV/0!	0
						#DIV/0!		#DIV/0!															#DIV/0!	#DIV/0!	#DIV/0!	#DIV/0!	#DIV/0!	#DIV/0!	#DIV/0!	#DIV/0!	#DIV/0!	#DIV/0!	#DIV/0!	#DIV/0!	#DIV/0!	0	0	0	0	0	0	#DIV/0!	#DIV/0!	#DIV/0!	#DIV/0!	#DIV/0!	#DIV/0!	#DIV/0!	0
						#DIV/0!		#DIV/0!															#DIV/0!	#DIV/0!	#DIV/0!	#DIV/0!	#DIV/0!	#DIV/0!	#DIV/0!	#DIV/0!	#DIV/0!	#DIV/0!	#DIV/0!	#DIV/0!	#DIV/0!	0	0	0	0	0	0	#DIV/0!	#DIV/0!	#DIV/0!	#DIV/0!	#DIV/0!	#DIV/0!	#DIV/0!	0
						#DIV/0!		#DIV/0!															#DIV/0!	#DIV/0!	#DIV/0!	#DIV/0!	#DIV/0!	#DIV/0!	#DIV/0!	#DIV/0!	#DIV/0!	#DIV/0!	#DIV/0!	#DIV/0!	#DIV/0!	0	0	0	0	0	0	#DIV/0!	#DIV/0!	#DIV/0!	#DIV/0!	#DIV/0!	#DIV/0!	#DIV/0!	0
						#DIV/0!		#DIV/0!															#DIV/0!	#DIV/0!	#DIV/0!	#DIV/0!	#DIV/0!	#DIV/0!	#DIV/0!	#DIV/0!	#DIV/0!	#DIV/0!	#DIV/0!	#DIV/0!	#DIV/0!	0	0	0	0	0	0	#DIV/0!	#DIV/0!	#DIV/0!	#DIV/0!	#DIV/0!	#DIV/0!	#DIV/0!	0
						#DIV/0!		#DIV/0!															#DIV/0!	#DIV/0!	#DIV/0!	#DIV/0!	#DIV/0!	#DIV/0!	#DIV/0!	#DIV/0!	#DIV/0!	#DIV/0!	#DIV/0!	#DIV/0!	#DIV/0!	0	0	0	0	0	0	#DIV/0!	#DIV/0!	#DIV/0!	#DIV/0!	#DIV/0!	#DIV/0!	#DIV/0!	0
						#DIV/0!		#DIV/0!															#DIV/0!	#DIV/0!	#DIV/0!	#DIV/0!	#DIV/0!	#DIV/0!	#DIV/0!	#DIV/0!	#DIV/0!	#DIV/0!	#DIV/0!	#DIV/0!	#DIV/0!	0	0	0	0	0	0	#DIV/0!	#DIV/0!	#DIV/0!	#DIV/0!	#DIV/0!	#DIV/0!	#DIV/0!	0
						#DIV/0!		#DIV/0!															#DIV/0!	#DIV/0!	#DIV/0!	#DIV/0!	#DIV/0!	#DIV/0!	#DIV/0!	#DIV/0!	#DIV/0!	#DIV/0!	#DIV/0!	#DIV/0!	#DIV/0!	0	0	0	0	0	0	#DIV/0!	#DIV/0!	#DIV/0!	#DIV/0!	#DIV/0!	#DIV/0!	#DIV/0!	0
						#DIV/0!		#DIV/0!															#DIV/0!	#DIV/0!	#DIV/0!	#DIV/0!	#DIV/0!	#DIV/0!	#DIV/0!	#DIV/0!	#DIV/0!	#DIV/0!	#DIV/0!	#DIV/0!	#DIV/0!	0	0	0	0	0	0	#DIV/0!	#DIV/0!	#DIV/0!	#DIV/0!	#DIV/0!	#DIV/0!	#DIV/0!	0
						#DIV/0!		#DIV/0!															#DIV/0!	#DIV/0!	#DIV/0!	#DIV/0!	#DIV/0!	#DIV/0!	#DIV/0!	#DIV/0!	#DIV/0!	#DIV/0!	#DIV/0!	#DIV/0!	#DIV/0!	0	0	0	0	0	0	#DIV/0!	#DIV/0!	#DIV/0!	#DIV/0!	#DIV/0!	#DIV/0!	#DIV/0!	0
						#DIV/0!		#DIV/0!															#DIV/0!	#DIV/0!	#DIV/0!	#DIV/0!	#DIV/0!	#DIV/0!	#DIV/0!	#DIV/0!	#DIV/0!	#DIV/0!	#DIV/0!	#DIV/0!	#DIV/0!	0	0	0	0	0	0	#DIV/0!	#DIV/0!	#DIV/0!	#DIV/0!	#DIV/0!	#DIV/0!	#DIV/0!	0
						#DIV/0!		#DIV/0!															#DIV/0!	#DIV/0!	#DIV/0!	#DIV/0!	#DIV/0!	#DIV/0!	#DIV/0!	#DIV/0!	#DIV/0!	#DIV/0!	#DIV/0!	#DIV/0!	#DIV/0!	0	0	0	0	0	0	#DIV/0!	#DIV/0!	#DIV/0!	#DIV/0!	#DIV/0!	#DIV/0!	#DIV/0!	0
						#DIV/0!		#DIV/0!															#DIV/0!	#DIV/0!	#DIV/0!	#DIV/0!	#DIV/0!	#DIV/0!	#DIV/0!	#DIV/0!	#DIV/0!	#DIV/0!	#DIV/0!	#DIV/0!	#DIV/0!	0	0	0	0	0	0	#DIV/0!	#DIV/0!	#DIV/0!	#DIV/0!	#DIV/0!	#DIV/0!	#DIV/0!	0
						#DIV/0!		#DIV/0!															#DIV/0!	#DIV/0!	#DIV/0!	#DIV/0!	#DIV/0!	#DIV/0!	#DIV/0!	#DIV/0!	#DIV/0!	#DIV/0!	#DIV/0!	#DIV/0!	#DIV/0!	0	0	0	0	0	0	#DIV/0!	#DIV/0!	#DIV/0!	#DIV/0!	#DIV/0!	#DIV/0!	#DIV/0!	0
						#DIV/0!		#DIV/0!															#DIV/0!	#DIV/0!	#DIV/0!	#DIV/0!	#DIV/0!	#DIV/0!	#DIV/0!	#DIV/0!	#DIV/0!	#DIV/0!	#DIV/0!	#DIV/0!	#DIV/0!	0	0	0	0	0	0	#DIV/0!	#DIV/0!	#DIV/0!	#DIV/0!	#DIV/0!	#DIV/0!	#DIV/0!	0
						#DIV/0!		#DIV/0!															#DIV/0!	#DIV/0!	#DIV/0!	#DIV/0!	#DIV/0!	#DIV/0!	#DIV/0!	#DIV/0!	#DIV/0!	#DIV/0!	#DIV/0!	#DIV/0!	#DIV/0!	0	0	0	0	0	0	#DIV/0!	#DIV/0!	#DIV/0!	#DIV/0!	#DIV/0!	#DIV/0!	#DIV/0!	0
						#DIV/0!		#DIV/0!															#DIV/0!	#DIV/0!	#DIV/0!	#DIV/0!	#DIV/0!	#DIV/0!	#DIV/0!	#DIV/0!	#DIV/0!	#DIV/0!	#DIV/0!	#DIV/0!	#DIV/0!	0	0	0	0	0	0	#DIV/0!	#DIV/0!	#DIV/0!	#DIV/0!	#DIV/0!	#DIV/0!	#DIV/0!	0
						#DIV/0!		#DIV/0!															#DIV/0!	#DIV/0!	#DIV/0!	#DIV/0!	#DIV/0!	#DIV/0!	#DIV/0!	#DIV/0!	#DIV/0!	#DIV/0!	#DIV/0!	#DIV/0!	#DIV/0!	0	0	0	0	0	0	#DIV/0!	#DIV/0!	#DIV/0!	#DIV/0!	#DIV/0!	#DIV/0!	#DIV/0!	0
						#DIV/0!		#DIV/0!															#DIV/0!	#DIV/0!	#DIV/0!	#DIV/0!	#DIV/0!	#DIV/0!	#DIV/0!	#DIV/0!	#DIV/0!	#DIV/0!	#DIV/0!	#DIV/0!	#DIV/0!	0	0	0	0	0	0	#DIV/0!	#DIV/0!	#DIV/0!	#DIV/0!	#DIV/0!	#DIV/0!	#DIV/0!	0
						#DIV/0!		#DIV/0!															#DIV/0!	#DIV/0!	#DIV/0!	#DIV/0!	#DIV/0!	#DIV/0!	#DIV/0!	#DIV/0!	#DIV/0!	#DIV/0!	#DIV/0!	#DIV/0!	#DIV/0!	0	0	0	0	0	0	#DIV/0!	#DIV/0!	#DIV/0!	#DIV/0!	#DIV/0!	#DIV/0!	#DIV/0!	0
						#DIV/0!		#DIV/0!															#DIV/0!	#DIV/0!	#DIV/0!	#DIV/0!	#DIV/0!	#DIV/0!	#DIV/0!	#DIV/0!	#DIV/0!	#DIV/0!	#DIV/0!	#DIV/0!	#DIV/0!	0	0	0	0	0	0	#DIV/0!	#DIV/0!	#DIV/0!	#DIV/0!	#DIV/0!	#DIV/0!	#DIV/0!	0
						#DIV/0!		#DIV/0!															#DIV/0!	#DIV/0!	#DIV/0!	#DIV/0!	#DIV/0!	#DIV/0!	#DIV/0!	#DIV/0!	#DIV/0!	#DIV/0!	#DIV/0!	#DIV/0!	#DIV/0!	0	0	0	0	0	0	#DIV/0!	#DIV/0!	#DIV/0!	#DIV/0!	#DIV/0!	#DIV/0!	#DIV/0!	0
						#DIV/0!		#DIV/0!															#DIV/0!	#DIV/0!	#DIV/0!	#DIV/0!	#DIV/0!	#DIV/0!	#DIV/0!	#DIV/0!	#DIV/0!	#DIV/0!	#DIV/0!	#DIV/0!	#DIV/0!	0	0	0	0	0	0	#DIV/0!	#DIV/0!	#DIV/0!	#DIV/0!	#DIV/0!	#DIV/0!	#DIV/0!	0
						#DIV/0!		#DIV/0!															#DIV/0!	#DIV/0!	#DIV/0!	#DIV/0!	#DIV/0!	#DIV/0!	#DIV/0!	#DIV/0!	#DIV/0!	#DIV/0!	#DIV/0!	#DIV/0!	#DIV/0!	0	0	0	0	0	0	#DIV/0!	#DIV/0!	#DIV/0!	#DIV/0!	#DIV/0!	#DIV/0!	#DIV/0!	0
						#DIV/0!		#DIV/0!															#DIV/0!	#DIV/0!	#DIV/0!	#DIV/0!	#DIV/0!	#DIV/0!	#DIV/0!	#DIV/0!	#DIV/0!	#DIV/0!	#DIV/0!	#DIV/0!	#DIV/0!	0	0	0	0	0	0	#DIV/0!	#DIV/0!	#DIV/0!	#DIV/0!	#DIV/0!	#DIV/0!	#DIV/0!	0
						#DIV/0!		#DIV/0!															#DIV/0!	#DIV/0!	#DIV/0!	#DIV/0!	#DIV/0!	#DIV/0!	#DIV/0!	#DIV/0!	#DIV/0!	#DIV/0!	#DIV/0!	#DIV/0!	#DIV/0!	0	0	0	0	0	0	#DIV/0!	#DIV/0!	#DIV/0!	#DIV/0!	#DIV/0!	#DIV/0!	#DIV/0!	0
						#DIV/0!		#DIV/0!															#DIV/0!	#DIV/0!	#DIV/0!	#DIV/0!	#DIV/0!	#DIV/0!	#DIV/0!	#DIV/0!	#DIV/0!	#DIV/0!	#DIV/0!	#DIV/0!	#DIV/0!	0	0	0	0	0	0	#DIV/0!	#DIV/0!	#DIV/0!	#DIV/0!	#DIV/0!	#DIV/0!	#DIV/0!	0
						#DIV/0!		#DIV/0!															#DIV/0!	#DIV/0!	#DIV/0!	#DIV/0!	#DIV/0!	#DIV/0!	#DIV/0!	#DIV/0!	#DIV/0!	#DIV/0!	#DIV/0!	#DIV/0!	#DIV/0!	0	0	0	0	0	0	#DIV/0!	#DIV/0!	#DIV/0!	#DIV/0!	#DIV/0!	#DIV/0!	#DIV/0!	0
						#DIV/0!		#DIV/0!															#DIV/0!	#DIV/0!	#DIV/0!	#DIV/0!	#DIV/0!	#DIV/0!	#DIV/0!	#DIV/0!	#DIV/0!	#DIV/0!	#DIV/0!	#DIV/0!	#DIV/0!	0	0	0	0	0	0	#DIV/0!	#DIV/0!	#DIV/0!	#DIV/0!	#DIV/0!	#DIV/0!	#DIV/0!	0
						#DIV/0!		#DIV/0!															#DIV/0!	#DIV/0!	#DIV/0!	#DIV/0!	#DIV/0!	#DIV/0!	#DIV/0!	#DIV/0!	#DIV/0!	#DIV/0!	#DIV/0!	#DIV/0!	#DIV/0!	0	0	0	0	0	0	#DIV/0!	#DIV/0!	#DIV/0!	#DIV/0!	#DIV/0!	#DIV/0!	#DIV/0!	0
						#DIV/0!		#DIV/0!															#DIV/0!	#DIV/0!	#DIV/0!	#DIV/0!	#DIV/0!	#DIV/0!	#DIV/0!	#DIV/0!	#DIV/0!	#DIV/0!	#DIV/0!	#DIV/0!	#DIV/0!	0	0	0	0	0	0	#DIV/0!	#DIV/0!	#DIV/0!	#DIV/0!	#DIV/0!	#DIV/0!	#DIV/0!	0
						#DIV/0!		#DIV/0!															#DIV/0!	#DIV/0!	#DIV/0!	#DIV/0!	#DIV/0!	#DIV/0!	#DIV/0!	#DIV/0!	#DIV/0!	#DIV/0!	#DIV/0!	#DIV/0!	#DIV/0!	0	0	0	0	0	0	#DIV/0!	#DIV/0!	#DIV/0!	#DIV/0!	#DIV/0!	#DIV/0!	#DIV/0!	0
						#DIV/0!		#DIV/0!															#DIV/0!	#DIV/0!	#DIV/0!	#DIV/0!	#DIV/0!	#DIV/0!	#DIV/0!	#DIV/0!	#DIV/0!	#DIV/0!	#DIV/0!	#DIV/0!	#DIV/0!	0	0	0	0	0	0	#DIV/0!	#DIV/0!	#DIV/0!	#DIV/0!	#DIV/0!	#DIV/0!	#DIV/0!	0
						#DIV/0!		#DIV/0!															#DIV/0!	#DIV/0!	#DIV/0!	#DIV/0!	#DIV/0!	#DIV/0!	#DIV/0!	#DIV/0!	#DIV/0!	#DIV/0!	#DIV/0!	#DIV/0!	#DIV/0!	0	0	0	0	0	0	#DIV/0!	#DIV/0!	#DIV/0!	#DIV/0!	#DIV/0!	#DIV/0!	#DIV/0!	0
						#DIV/0!		#DIV/0!															#DIV/0!	#DIV/0!	#DIV/0!	#DIV/0!	#DIV/0!	#DIV/0!	#DIV/0!	#DIV/0!	#DIV/0!	#DIV/0!	#DIV/0!	#DIV/0!	#DIV/0!	0	0	0	0	0	0	#DIV/0!	#DIV/0!	#DIV/0!	#DIV/0!	#DIV/0!	#DIV/0!	#DIV/0!	0
						#DIV/0!		#DIV/0!															#DIV/0!	#DIV/0!	#DIV/0!	#DIV/0!	#DIV/0!	#DIV/0!	#DIV/0!	#DIV/0!	#DIV/0!	#DIV/0!	#DIV/0!	#DIV/0!	#DIV/0!	0	0	0	0	0	0	#DIV/0!	#DIV/0!	#DIV/0!	#DIV/0!	#DIV/0!	#DIV/0!	#DIV/0!	0
						#DIV/0!		#DIV/0!															#DIV/0!	#DIV/0!	#DIV/0!	#DIV/0!	#DIV/0!	#DIV/0!	#DIV/0!	#DIV/0!	#DIV/0!	#DIV/0!	#DIV/0!	#DIV/0!	#DIV/0!	0	0	0	0	0	0	#DIV/0!	#DIV/0!	#DIV/0!	#DIV/0!	#DIV/0!	#DIV/0!	#DIV/0!	0
						#DIV/0!		#DIV/0!															#DIV/0!	#DIV/0!	#DIV/0!	#DIV/0!	#DIV/0!	#DIV/0!	#DIV/0!	#DIV/0!	#DIV/0!	#DIV/0!	#DIV/0!	#DIV/0!	#DIV/0!	0	0	0	0	0	0	#DIV/0!	#DIV/0!	#DIV/0!	#DIV/0!	#DIV/0!	#DIV/0!	#DIV/0!	0
						#DIV/0!		#DIV/0!															#DIV/0!	#DIV/0!	#DIV/0!	#DIV/0!	#DIV/0!	#DIV/0!	#DIV/0!	#DIV/0!	#DIV/0!	#DIV/0!	#DIV/0!	#DIV/0!	#DIV/0!	0	0	0	0	0	0	#DIV/0!	#DIV/0!	#DIV/0!	#DIV/0!	#DIV/0!	#DIV/0!	#DIV/0!	0
						#DIV/0!		#DIV/0!															#DIV/0!	#DIV/0!	#DIV/0!	#DIV/0!	#DIV/0!	#DIV/0!	#DIV/0!	#DIV/0!	#DIV/0!	#DIV/0!	#DIV/0!	#DIV/0!	#DIV/0!	0	0	0	0	0	0	#DIV/0!	#DIV/0!	#DIV/0!	#DIV/0!	#DIV/0!	#DIV/0!	#DIV/0!	0
						#DIV/0!		#DIV/0!															#DIV/0!	#DIV/0!	#DIV/0!	#DIV/0!	#DIV/0!	#DIV/0!	#DIV/0!	#DIV/0!	#DIV/0!	#DIV/0!	#DIV/0!	#DIV/0!	#DIV/0!	0	0	0	0	0	0	#DIV/0!	#DIV/0!	#DIV/0!	#DIV/0!	#DIV/0!	#DIV/0!	#DIV/0!	0
						#DIV/0!		#DIV/0!															#DIV/0!	#DIV/0!	#DIV/0!	#DIV/0!	#DIV/0!	#DIV/0!	#DIV/0!	#DIV/0!	#DIV/0!	#DIV/0!	#DIV/0!	#DIV/0!	#DIV/0!	0	0	0	0	0	0	#DIV/0!	#DIV/0!	#DIV/0!	#DIV/0!	#DIV/0!	#DIV/0!	#DIV/0!	0
						#DIV/0!		#DIV/0!															#DIV/0!	#DIV/0!	#DIV/0!	#DIV/0!	#DIV/0!	#DIV/0!	#DIV/0!	#DIV/0!	#DIV/0!	#DIV/0!	#DIV/0!	#DIV/0!	#DIV/0!	0	0	0	0	0	0	#DIV/0!	#DIV/0!	#DIV/0!	#DIV/0!	#DIV/0!	#DIV/0!	#DIV/0!	0
						#DIV/0!		#DIV/0!															#DIV/0!	#DIV/0!	#DIV/0!	#DIV/0!	#DIV/0!	#DIV/0!	#DIV/0!	#DIV/0!	#DIV/0!	#DIV/0!	#DIV/0!	#DIV/0!	#DIV/0!	0	0	0	0	0	0	#DIV/0!	#DIV/0!	#DIV/0!	#DIV/0!	#DIV/0!	#DIV/0!	#DIV/0!	0
						#DIV/0!		#DIV/0!															#DIV/0!	#DIV/0!	#DIV/0!	#DIV/0!	#DIV/0!	#DIV/0!	#DIV/0!	#DIV/0!	#DIV/0!	#DIV/0!	#DIV/0!	#DIV/0!	#DIV/0!	0	0	0	0	0	0	#DIV/0!	#DIV/0!	#DIV/0!	#DIV/0!	#DIV/0!	#DIV/0!	#DIV/0!	0
						#DIV/0!		#DIV/0!															#DIV/0!	#DIV/0!	#DIV/0!	#DIV/0!	#DIV/0!	#DIV/0!	#DIV/0!	#DIV/0!	#DIV/0!	#DIV/0!	#DIV/0!	#DIV/0!	#DIV/0!	0	0	0	0	0	0	#DIV/0!	#DIV/0!	#DIV/0!	#DIV/0!	#DIV/0!	#DIV/0!	#DIV/0!	0
						#DIV/0!		#DIV/0!															#DIV/0!	#DIV/0!	#DIV/0!	#DIV/0!	#DIV/0!	#DIV/0!	#DIV/0!	#DIV/0!	#DIV/0!	#DIV/0!	#DIV/0!	#DIV/0!	#DIV/0!	0	0	0	0	0	0	#DIV/0!	#DIV/0!	#DIV/0!	#DIV/0!	#DIV/0!	#DIV/0!	#DIV/0!	0
						#DIV/0!		#DIV/0!															#DIV/0!	#DIV/0!	#DIV/0!	#DIV/0!	#DIV/0!	#DIV/0!	#DIV/0!	#DIV/0!	#DIV/0!	#DIV/0!	#DIV/0!	#DIV/0!	#DIV/0!	0	0	0	0	0	0	#DIV/0!	#DIV/0!	#DIV/0!	#DIV/0!	#DIV/0!	#DIV/0!	#DIV/0!	0
						#DIV/0!		#DIV/0!															#DIV/0!	#DIV/0!	#DIV/0!	#DIV/0!	#DIV/0!	#DIV/0!	#DIV/0!	#DIV/0!	#DIV/0!	#DIV/0!	#DIV/0!	#DIV/0!	#DIV/0!	0	0	0	0	0	0	#DIV/0!	#DIV/0!	#DIV/0!	#DIV/0!	#DIV/0!	#DIV/0!	#DIV/0!	0
						#DIV/0!		#DIV/0!															#DIV/0!	#DIV/0!	#DIV/0!	#DIV/0!	#DIV/0!	#DIV/0!	#DIV/0!	#DIV/0!	#DIV/0!	#DIV/0!	#DIV/0!	#DIV/0!	#DIV/0!	0	0	0	0	0	0	#DIV/0!	#DIV/0!	#DIV/0!	#DIV/0!	#DIV/0!	#DIV/0!	#DIV/0!	0
						#DIV/0!		#DIV/0!															#DIV/0!	#DIV/0!	#DIV/0!	#DIV/0!	#DIV/0!	#DIV/0!	#DIV/0!	#DIV/0!	#DIV/0!	#DIV/0!	#DIV/0!	#DIV/0!	#DIV/0!	0	0	0	0	0	0	#DIV/0!	#DIV/0!	#DIV/0!	#DIV/0!	#DIV/0!	#DIV/0!	#DIV/0!	0
						#DIV/0!		#DIV/0!															#DIV/0!	#DIV/0!	#DIV/0!	#DIV/0!	#DIV/0!	#DIV/0!	#DIV/0!	#DIV/0!	#DIV/0!	#DIV/0!	#DIV/0!	#DIV/0!	#DIV/0!	0	0	0	0	0	0	#DIV/0!	#DIV/0!	#DIV/0!	#DIV/0!	#DIV/0!	#DIV/0!	#DIV/0!	0
						#DIV/0!		#DIV/0!															#DIV/0!	#DIV/0!	#DIV/0!	#DIV/0!	#DIV/0!	#DIV/0!	#DIV/0!	#DIV/0!	#DIV/0!	#DIV/0!	#DIV/0!	#DIV/0!	#DIV/0!	0	0	0	0	0	0	#DIV/0!	#DIV/0!	#DIV/0!	#DIV/0!	#DIV/0!	#DIV/0!	#DIV/0!	0
						#DIV/0!		#DIV/0!															#DIV/0!	#DIV/0!	#DIV/0!	#DIV/0!	#DIV/0!	#DIV/0!	#DIV/0!	#DIV/0!	#DIV/0!	#DIV/0!	#DIV/0!	#DIV/0!	#DIV/0!	0	0	0	0	0	0	#DIV/0!	#DIV/0!	#DIV/0!	#DIV/0!	#DIV/0!	#DIV/0!	#DIV/0!	0
						#DIV/0!		#DIV/0!															#DIV/0!	#DIV/0!	#DIV/0!	#DIV/0!	#DIV/0!	#DIV/0!	#DIV/0!	#DIV/0!	#DIV/0!	#DIV/0!	#DIV/0!	#DIV/0!	#DIV/0!	0	0	0	0	0	0	#DIV/0!	#DIV/0!	#DIV/0!	#DIV/0!	#DIV/0!	#DIV/0!	#DIV/0!	0
						#DIV/0!		#DIV/0!															#DIV/0!	#DIV/0!	#DIV/0!	#DIV/0!	#DIV/0!	#DIV/0!	#DIV/0!	#DIV/0!	#DIV/0!	#DIV/0!	#DIV/0!	#DIV/0!	#DIV/0!	0	0	0	0	0	0	#DIV/0!	#DIV/0!	#DIV/0!	#DIV/0!	#DIV/0!	#DIV/0!	#DIV/0!	0
						#DIV/0!		#DIV/0!															#DIV/0!	#DIV/0!	#DIV/0!	#DIV/0!	#DIV/0!	#DIV/0!	#DIV/0!	#DIV/0!	#DIV/0!	#DIV/0!	#DIV/0!	#DIV/0!	#DIV/0!	0	0	0	0	0	0	#DIV/0!	#DIV/0!	#DIV/0!	#DIV/0!	#DIV/0!	#DIV/0!	#DIV/0!	0
						#DIV/0!		#DIV/0!															#DIV/0!	#DIV/0!	#DIV/0!	#DIV/0!	#DIV/0!	#DIV/0!	#DIV/0!	#DIV/0!	#DIV/0!	#DIV/0!	#DIV/0!	#DIV/0!	#DIV/0!	0	0	0	0	0	0	#DIV/0!	#DIV/0!	#DIV/0!	#DIV/0!	#DIV/0!	#DIV/0!	#DIV/0!	0
						#DIV/0!		#DIV/0!															#DIV/0!	#DIV/0!	#DIV/0!	#DIV/0!	#DIV/0!	#DIV/0!	#DIV/0!	#DIV/0!	#DIV/0!	#DIV/0!	#DIV/0!	#DIV/0!	#DIV/0!	0	0	0	0	0	0	#DIV/0!	#DIV/0!	#DIV/0!	#DIV/0!	#DIV/0!	#DIV/0!	#DIV/0!	0
						#DIV/0!		#DIV/0!															#DIV/0!	#DIV/0!	#DIV/0!	#DIV/0!	#DIV/0!	#DIV/0!	#DIV/0!	#DIV/0!	#DIV/0!	#DIV/0!	#DIV/0!	#DIV/0!	#DIV/0!	0	0	0	0	0	0	#DIV/0!	#DIV/0!	#DIV/0!	#DIV/0!	#DIV/0!	#DIV/0!	#DIV/0!	0
						#DIV/0!		#DIV/0!															#DIV/0!	#DIV/0!	#DIV/0!	#DIV/0!	#DIV/0!	#DIV/0!	#DIV/0!	#DIV/0!	#DIV/0!	#DIV/0!	#DIV/0!	#DIV/0!	#DIV/0!	0	0	0	0	0	0	#DIV/0!	#DIV/0!	#DIV/0!	#DIV/0!	#DIV/0!	#DIV/0!	#DIV/0!	0
						#DIV/0!		#DIV/0!															#DIV/0!	#DIV/0!	#DIV/0!	#DIV/0!	#DIV/0!	#DIV/0!	#DIV/0!	#DIV/0!	#DIV/0!	#DIV/0!	#DIV/0!	#DIV/0!	#DIV/0!	0	0	0	0	0	0	#DIV/0!	#DIV/0!	#DIV/0!	#DIV/0!	#DIV/0!	#DIV/0!	#DIV/0!	0
						#DIV/0!		#DIV/0!															#DIV/0!	#DIV/0!	#DIV/0!	#DIV/0!	#DIV/0!	#DIV/0!	#DIV/0!	#DIV/0!	#DIV/0!	#DIV/0!	#DIV/0!	#DIV/0!	#DIV/0!	0	0	0	0	0	0	#DIV/0!	#DIV/0!	#DIV/0!	#DIV/0!	#DIV/0!	#DIV/0!	#DIV/0!	0
						#DIV/0!		#DIV/0!															#DIV/0!	#DIV/0!	#DIV/0!	#DIV/0!	#DIV/0!	#DIV/0!	#DIV/0!	#DIV/0!	#DIV/0!	#DIV/0!	#DIV/0!	#DIV/0!	#DIV/0!	0	0	0	0	0	0	#DIV/0!	#DIV/0!	#DIV/0!	#DIV/0!	#DIV/0!	#DIV/0!	#DIV/0!	0
						#DIV/0!		#DIV/0!															#DIV/0!	#DIV/0!	#DIV/0!	#DIV/0!	#DIV/0!	#DIV/0!	#DIV/0!	#DIV/0!	#DIV/0!	#DIV/0!	#DIV/0!	#DIV/0!	#DIV/0!	0	0	0	0	0	0	#DIV/0!	#DIV/0!	#DIV/0!	#DIV/0!	#DIV/0!	#DIV/0!	#DIV/0!	0
						#DIV/0!		#DIV/0!															#DIV/0!	#DIV/0!	#DIV/0!	#DIV/0!	#DIV/0!	#DIV/0!	#DIV/0!	#DIV/0!	#DIV/0!	#DIV/0!	#DIV/0!	#DIV/0!	#DIV/0!	0	0	0	0	0	0	#DIV/0!	#DIV/0!	#DIV/0!	#DIV/0!	#DIV/0!	#DIV/0!	#DIV/0!	0
						#DIV/0!		#DIV/0!															#DIV/0!	#DIV/0!	#DIV/0!	#DIV/0!	#DIV/0!	#DIV/0!	#DIV/0!	#DIV/0!	#DIV/0!	#DIV/0!	#DIV/0!	#DIV/0!	#DIV/0!	0	0	0	0	0	0	#DIV/0!	#DIV/0!	#DIV/0!	#DIV/0!	#DIV/0!	#DIV/0!	#DIV/0!	0
						#DIV/0!		#DIV/0!															#DIV/0!	#DIV/0!	#DIV/0!	#DIV/0!	#DIV/0!	#DIV/0!	#DIV/0!	#DIV/0!	#DIV/0!	#DIV/0!	#DIV/0!	#DIV/0!	#DIV/0!	0	0	0	0	0	0	#DIV/0!	#DIV/0!	#DIV/0!	#DIV/0!	#DIV/0!	#DIV/0!	#DIV/0!	0
						#DIV/0!		#DIV/0!															#DIV/0!	#DIV/0!	#DIV/0!	#DIV/0!	#DIV/0!	#DIV/0!	#DIV/0!	#DIV/0!	#DIV/0!	#DIV/0!	#DIV/0!	#DIV/0!	#DIV/0!	0	0	0	0	0	0	#DIV/0!	#DIV/0!	#DIV/0!	#DIV/0!	#DIV/0!	#DIV/0!	#DIV/0!	0
						#DIV/0!		#DIV/0!															#DIV/0!	#DIV/0!	#DIV/0!	#DIV/0!	#DIV/0!	#DIV/0!	#DIV/0!	#DIV/0!	#DIV/0!	#DIV/0!	#DIV/0!	#DIV/0!	#DIV/0!	0	0	0	0	0	0	#DIV/0!	#DIV/0!	#DIV/0!	#DIV/0!	#DIV/0!	#DIV/0!	#DIV/0!	0
						#DIV/0!		#DIV/0!															#DIV/0!	#DIV/0!	#DIV/0!	#DIV/0!	#DIV/0!	#DIV/0!	#DIV/0!	#DIV/0!	#DIV/0!	#DIV/0!	#DIV/0!	#DIV/0!	#DIV/0!	0	0	0	0	0	0	#DIV/0!	#DIV/0!	#DIV/0!	#DIV/0!	#DIV/0!	#DIV/0!	#DIV/0!	0
						#DIV/0!		#DIV/0!															#DIV/0!	#DIV/0!	#DIV/0!	#DIV/0!	#DIV/0!	#DIV/0!	#DIV/0!	#DIV/0!	#DIV/0!	#DIV/0!	#DIV/0!	#DIV/0!	#DIV/0!	0	0	0	0	0	0	#DIV/0!	#DIV/0!	#DIV/0!	#DIV/0!	#DIV/0!	#DIV/0!	#DIV/0!	0
						#DIV/0!		#DIV/0!															#DIV/0!	#DIV/0!	#DIV/0!	#DIV/0!	#DIV/0!	#DIV/0!	#DIV/0!	#DIV/0!	#DIV/0!	#DIV/0!	#DIV/0!	#DIV/0!	#DIV/0!	0	0	0	0	0	0	#DIV/0!	#DIV/0!	#DIV/0!	#DIV/0!	#DIV/0!	#DIV/0!	#DIV/0!	0
						#DIV/0!		#DIV/0!															#DIV/0!	#DIV/0!	#DIV/0!	#DIV/0!	#DIV/0!	#DIV/0!	#DIV/0!	#DIV/0!	#DIV/0!	#DIV/0!	#DIV/0!	#DIV/0!	#DIV/0!	0	0	0	0	0	0	#DIV/0!	#DIV/0!	#DIV/0!	#DIV/0!	#DIV/0!	#DIV/0!	#DIV/0!	0
						#DIV/0!		#DIV/0!															#DIV/0!	#DIV/0!	#DIV/0!	#DIV/0!	#DIV/0!	#DIV/0!	#DIV/0!	#DIV/0!	#DIV/0!	#DIV/0!	#DIV/0!	#DIV/0!	#DIV/0!	0	0	0	0	0	0	#DIV/0!	#DIV/0!	#DIV/0!	#DIV/0!	#DIV/0!	#DIV/0!	#DIV/0!	0
						#DIV/0!		#DIV/0!															#DIV/0!	#DIV/0!	#DIV/0!	#DIV/0!	#DIV/0!	#DIV/0!	#DIV/0!	#DIV/0!	#DIV/0!	#DIV/0!	#DIV/0!	#DIV/0!	#DIV/0!	0	0	0	0	0	0	#DIV/0!	#DIV/0!	#DIV/0!	#DIV/0!	#DIV/0!	#DIV/0!	#DIV/0!	0
						#DIV/0!		#DIV/0!															#DIV/0!	#DIV/0!	#DIV/0!	#DIV/0!	#DIV/0!	#DIV/0!	#DIV/0!	#DIV/0!	#DIV/0!	#DIV/0!	#DIV/0!	#DIV/0!	#DIV/0!	0	0	0	0	0	0	#DIV/0!	#DIV/0!	#DIV/0!	#DIV/0!	#DIV/0!	#DIV/0!	#DIV/0!	0
						#DIV/0!		#DIV/0!															#DIV/0!	#DIV/0!	#DIV/0!	#DIV/0!	#DIV/0!	#DIV/0!	#DIV/0!	#DIV/0!	#DIV/0!	#DIV/0!	#DIV/0!	#DIV/0!	#DIV/0!	0	0	0	0	0	0	#DIV/0!	#DIV/0!	#DIV/0!	#DIV/0!	#DIV/0!	#DIV/0!	#DIV/0!	0
						#DIV/0!		#DIV/0!															#DIV/0!	#DIV/0!	#DIV/0!	#DIV/0!	#DIV/0!	#DIV/0!	#DIV/0!	#DIV/0!	#DIV/0!	#DIV/0!	#DIV/0!	#DIV/0!	#DIV/0!	0	0	0	0	0	0	#DIV/0!	#DIV/0!	#DIV/0!	#DIV/0!	#DIV/0!	#DIV/0!	#DIV/0!	0
						#DIV/0!		#DIV/0!															#DIV/0!	#DIV/0!	#DIV/0!	#DIV/0!	#DIV/0!	#DIV/0!	#DIV/0!	#DIV/0!	#DIV/0!	#DIV/0!	#DIV/0!	#DIV/0!	#DIV/0!	0	0	0	0	0	0	#DIV/0!	#DIV/0!	#DIV/0!	#DIV/0!	#DIV/0!	#DIV/0!	#DIV/0!	0
						#DIV/0!		#DIV/0!															#DIV/0!	#DIV/0!	#DIV/0!	#DIV/0!	#DIV/0!	#DIV/0!	#DIV/0!	#DIV/0!	#DIV/0!	#DIV/0!	#DIV/0!	#DIV/0!	#DIV/0!	0	0	0	0	0	0	#DIV/0!	#DIV/0!	#DIV/0!	#DIV/0!	#DIV/0!	#DIV/0!	#DIV/0!	0
						#DIV/0!		#DIV/0!															#DIV/0!	#DIV/0!	#DIV/0!	#DIV/0!	#DIV/0!	#DIV/0!	#DIV/0!	#DIV/0!	#DIV/0!	#DIV/0!	#DIV/0!	#DIV/0!	#DIV/0!	0	0	0	0	0	0	#DIV/0!	#DIV/0!	#DIV/0!	#DIV/0!	#DIV/0!	#DIV/0!	#DIV/0!	0
						#DIV/0!		#DIV/0!															#DIV/0!	#DIV/0!	#DIV/0!	#DIV/0!	#DIV/0!	#DIV/0!	#DIV/0!	#DIV/0!	#DIV/0!	#DIV/0!	#DIV/0!	#DIV/0!	#DIV/0!	0	0	0	0	0	0	#DIV/0!	#DIV/0!	#DIV/0!	#DIV/0!	#DIV/0!	#DIV/0!	#DIV/0!	0
						#DIV/0!		#DIV/0!															#DIV/0!	#DIV/0!	#DIV/0!	#DIV/0!	#DIV/0!	#DIV/0!	#DIV/0!	#DIV/0!	#DIV/0!	#DIV/0!	#DIV/0!	#DIV/0!	#DIV/0!	0	0	0	0	0	0	#DIV/0!	#DIV/0!	#DIV/0!	#DIV/0!	#DIV/0!	#DIV/0!	#DIV/0!	0
						#DIV/0!		#DIV/0!															#DIV/0!	#DIV/0!	#DIV/0!	#DIV/0!	#DIV/0!	#DIV/0!	#DIV/0!	#DIV/0!	#DIV/0!	#DIV/0!	#DIV/0!	#DIV/0!	#DIV/0!	0	0	0	0	0	0	#DIV/0!	#DIV/0!	#DIV/0!	#DIV/0!	#DIV/0!	#DIV/0!	#DIV/0!	0
						#DIV/0!		#DIV/0!															#DIV/0!	#DIV/0!	#DIV/0!	#DIV/0!	#DIV/0!	#DIV/0!	#DIV/0!	#DIV/0!	#DIV/0!	#DIV/0!	#DIV/0!	#DIV/0!	#DIV/0!	0	0	0	0	0	0	#DIV/0!	#DIV/0!	#DIV/0!	#DIV/0!	#DIV/0!	#DIV/0!	#DIV/0!	0
						#DIV/0!		#DIV/0!															#DIV/0!	#DIV/0!	#DIV/0!	#DIV/0!	#DIV/0!	#DIV/0!	#DIV/0!	#DIV/0!	#DIV/0!	#DIV/0!	#DIV/0!	#DIV/0!	#DIV/0!	0	0	0	0	0	0	#DIV/0!	#DIV/0!	#DIV/0!	#DIV/0!	#DIV/0!	#DIV/0!	#DIV/0!	0
						#DIV/0!		#DIV/0!															#DIV/0!	#DIV/0!	#DIV/0!	#DIV/0!	#DIV/0!	#DIV/0!	#DIV/0!	#DIV/0!	#DIV/0!	#DIV/0!	#DIV/0!	#DIV/0!	#DIV/0!	0	0	0	0	0	0	#DIV/0!	#DIV/0!	#DIV/0!	#DIV/0!	#DIV/0!	#DIV/0!	#DIV/0!	0
						#DIV/0!		#DIV/0!															#DIV/0!	#DIV/0!	#DIV/0!	#DIV/0!	#DIV/0!	#DIV/0!	#DIV/0!	#DIV/0!	#DIV/0!	#DIV/0!	#DIV/0!	#DIV/0!	#DIV/0!	0	0	0	0	0	0	#DIV/0!	#DIV/0!	#DIV/0!	#DIV/0!	#DIV/0!	#DIV/0!	#DIV/0!	0
						#DIV/0!		#DIV/0!															#DIV/0!	#DIV/0!	#DIV/0!	#DIV/0!	#DIV/0!	#DIV/0!	#DIV/0!	#DIV/0!	#DIV/0!	#DIV/0!	#DIV/0!	#DIV/0!	#DIV/0!	0	0	0	0	0	0	#DIV/0!	#DIV/0!	#DIV/0!	#DIV/0!	#DIV/0!	#DIV/0!	#DIV/0!	0
						#DIV/0!		#DIV/0!															#DIV/0!	#DIV/0!	#DIV/0!	#DIV/0!	#DIV/0!	#DIV/0!	#DIV/0!	#DIV/0!	#DIV/0!	#DIV/0!	#DIV/0!	#DIV/0!	#DIV/0!	0	0	0	0	0	0	#DIV/0!	#DIV/0!	#DIV/0!	#DIV/0!	#DIV/0!	#DIV/0!	#DIV/0!	0
						#DIV/0!		#DIV/0!															#DIV/0!	#DIV/0!	#DIV/0!	#DIV/0!	#DIV/0!	#DIV/0!	#DIV/0!	#DIV/0!	#DIV/0!	#DIV/0!	#DIV/0!	#DIV/0!	#DIV/0!	0	0	0	0	0	0	#DIV/0!	#DIV/0!	#DIV/0!	#DIV/0!	#DIV/0!	#DIV/0!	#DIV/0!	0
						#DIV/0!		#DIV/0!															#DIV/0!	#DIV/0!	#DIV/0!	#DIV/0!	#DIV/0!	#DIV/0!	#DIV/0!	#DIV/0!	#DIV/0!	#DIV/0!	#DIV/0!	#DIV/0!	#DIV/0!	0	0	0	0	0	0	#DIV/0!	#DIV/0!	#DIV/0!	#DIV/0!	#DIV/0!	#DIV/0!	#DIV/0!	0
						#DIV/0!		#DIV/0!															#DIV/0!	#DIV/0!	#DIV/0!	#DIV/0!	#DIV/0!	#DIV/0!	#DIV/0!	#DIV/0!	#DIV/0!	#DIV/0!	#DIV/0!	#DIV/0!	#DIV/0!	0	0	0	0	0	0	#DIV/0!	#DIV/0!	#DIV/0!	#DIV/0!	#DIV/0!	#DIV/0!	#DIV/0!	0
						#DIV/0!		#DIV/0!															#DIV/0!	#DIV/0!	#DIV/0!	#DIV/0!	#DIV/0!	#DIV/0!	#DIV/0!	#DIV/0!	#DIV/0!	#DIV/0!	#DIV/0!	#DIV/0!	#DIV/0!	0	0	0	0	0	0	#DIV/0!	#DIV/0!	#DIV/0!	#DIV/0!	#DIV/0!	#DIV/0!	#DIV/0!	0
						#DIV/0!		#DIV/0!															#DIV/0!	#DIV/0!	#DIV/0!	#DIV/0!	#DIV/0!	#DIV/0!	#DIV/0!	#DIV/0!	#DIV/0!	#DIV/0!	#DIV/0!	#DIV/0!	#DIV/0!	0	0	0	0	0	0	#DIV/0!	#DIV/0!	#DIV/0!	#DIV/0!	#DIV/0!	#DIV/0!	#DIV/0!	0
						#DIV/0!		#DIV/0!															#DIV/0!	#DIV/0!	#DIV/0!	#DIV/0!	#DIV/0!	#DIV/0!	#DIV/0!	#DIV/0!	#DIV/0!	#DIV/0!	#DIV/0!	#DIV/0!	#DIV/0!	0	0	0	0	0	0	#DIV/0!	#DIV/0!	#DIV/0!	#DIV/0!	#DIV/0!	#DIV/0!	#DIV/0!	0
						#DIV/0!		#DIV/0!															#DIV/0!	#DIV/0!	#DIV/0!	#DIV/0!	#DIV/0!	#DIV/0!	#DIV/0!	#DIV/0!	#DIV/0!	#DIV/0!	#DIV/0!	#DIV/0!	#DIV/0!	0	0	0	0	0	0	#DIV/0!	#DIV/0!	#DIV/0!	#DIV/0!	#DIV/0!	#DIV/0!	#DIV/0!	0
						#DIV/0!		#DIV/0!															#DIV/0!	#DIV/0!	#DIV/0!	#DIV/0!	#DIV/0!	#DIV/0!	#DIV/0!	#DIV/0!	#DIV/0!	#DIV/0!	#DIV/0!	#DIV/0!	#DIV/0!	0	0	0	0	0	0	#DIV/0!	#DIV/0!	#DIV/0!	#DIV/0!	#DIV/0!	#DIV/0!	#DIV/0!	0
						#DIV/0!		#DIV/0!															#DIV/0!	#DIV/0!	#DIV/0!	#DIV/0!	#DIV/0!	#DIV/0!	#DIV/0!	#DIV/0!	#DIV/0!	#DIV/0!	#DIV/0!	#DIV/0!	#DIV/0!	0	0	0	0	0	0	#DIV/0!	#DIV/0!	#DIV/0!	#DIV/0!	#DIV/0!	#DIV/0!	#DIV/0!	0
						#DIV/0!		#DIV/0!															#DIV/0!	#DIV/0!	#DIV/0!	#DIV/0!	#DIV/0!	#DIV/0!	#DIV/0!	#DIV/0!	#DIV/0!	#DIV/0!	#DIV/0!	#DIV/0!	#DIV/0!	0	0	0	0	0	0	#DIV/0!	#DIV/0!	#DIV/0!	#DIV/0!	#DIV/0!	#DIV/0!	#DIV/0!	0
						#DIV/0!		#DIV/0!
[truncated: 33 more columns]

## Sheet: Site4
Date:	18/9/00
Site No. :	4V23
			Trans 1 for shrubs >0.5m						Trans 1a for shrubs <0.5m				Trans 2 for Alb ant,Thy afr, Col mop, Cad ter, Aca tor, Mae jun, Dal mel, Gre ina, Gre fla, Pte bre
			Width (m)	Length (m)	Area (ha)			Length (m)	Width (m)	Length (m)	Area (ha)		Width (m)	Length (m)	Area (ha)
	Transect Dimensions:		20	50	0.1				5	50	0.025		50	50	0.25
	Co-ordinates:			X	Y			X		X	Y			X	Y
			NW Corner						NW Corner				NW Corner
			SW Corner						SW Corner				SW Corner
			NE Corner						NE Corner				NE Corner
			SE Corner						SE Corner				SE Corner
									OED		OUD	NED		NUD	NFD	OFD	OBE	OBU	NBE	NBU	RE	Notes	Canopy volume (m3)																				Damage
Trans. No.	Sp. Code	Coppice	Height (m)	D1 (m)	D2 (m)	R	Shape	Adj. shape	Score	Eaten		Score	Eaten										Total	0.5	1	2	3	4	5	0.5	1	2	3	4	5	OED	OUD	NED	NUD	NFD	OFD	Old Rec. Vol.	OED	OUD	NED	NUD	NFD	OFD	Sp. Code
1a	Alb ant	T	0.5	0.4	0.3	0.175	1	1														Browsed	0.0481056	0.0481056	0.0962113	0.192423	0.288634	0.384845	0.481056	0.0481056	0.0481056	0.0481056	0.0481056	0.0481056	0.0481056	0	0	0	0	0	0	0.0481056	0	0	0	0	0	0	Alb ant
1a	Com mos	T	0.6	0.4	0.2	0.15	1	1														Browsed	0.0424115	0.0353429	0.0706858	0.141372	0.212058	0.282743	0.353429	0.0353429	0.0424115	0.0424115	0.0424115	0.0424115	0.0424115	0	0	0	0	0	0	0.0424115	0	0	0	0	0	0	Com mos
1a	Mae par	T	0.2	0.2	0.1	0.075	1	1															0.00353429	0.00883573	0.0176715	0.0353429	0.0530144	0.0706858	0.0883573	0.00353429	0.00353429	0.00353429	0.00353429	0.00353429	0.00353429	0	0	0	0	0	0	0.00353429	0	0	0	0	0	0	Mae par
1a	Mae par	T	0.6	0.3	0.2	0.125	1	1															0.0294524	0.0245437	0.0490874	0.0981748	0.147262	0.19635	0.245437	0.0245437	0.0294524	0.0294524	0.0294524	0.0294524	0.0294524	0	0	0	0	0	0	0.0294524	0	0	0	0	0	0	Mae par
1a	Mae par	T	0.3	0.3	0.2	0.125	1	1															0.0147262	0.0245437	0.0490874	0.0981748	0.147262	0.19635	0.245437	0.0147262	0.0147262	0.0147262	0.0147262	0.0147262	0.0147262	0	0	0	0	0	0	0.0147262	0	0	0	0	0	0	Mae par
1a	Com mos	T	0.3	0.3	0.2	0.125	1	1														Browsed	0.0147262	0.0245437	0.0490874	0.0981748	0.147262	0.19635	0.245437	0.0147262	0.0147262	0.0147262	0.0147262	0.0147262	0.0147262	0	0	0	0	0	0	0.0147262	0	0	0	0	0	0	Com mos
1a	Cad ter	T	0.5	0.5	0.5	0.25	1	1															0.0981748	0.0981748	0.19635	0.392699	0.589049	0.785398	0.981748	0.0981748	0.0981748	0.0981748	0.0981748	0.0981748	0.0981748	0	0	0	0	0	0	0.0981748	0	0	0	0	0	0	Cad ter
1a	Com mos	T	1.2	0.3	0.2	0.125	1	1															0.0589049	0.0245437	0.0490874	0.0981748	0.147262	0.19635	0.245437	0.0245437	0.0490874	0.0589049	0.0589049	0.0589049	0.0589049	0	0	0	0	0	0	0.0589049	0	0	0	0	0	0	Com mos
1a	Mae par	T	0.3	0.3	0.3	0.15	1	1															0.0212058	0.0353429	0.0706858	0.141372	0.212058	0.282743	0.353429	0.0212058	0.0212058	0.0212058	0.0212058	0.0212058	0.0212058	0	0	0	0	0	0	0.0212058	0	0	0	0	0	0	Mae par
1a	Mae par	T	0.5	0.4	0.3	0.175	1	1															0.0481056	0.0481056	0.0962113	0.192423	0.288634	0.384845	0.481056	0.0481056	0.0481056	0.0481056	0.0481056	0.0481056	0.0481056	0	0	0	0	0	0	0.0481056	0	0	0	0	0	0	Mae par
1a	Com mos	T	0.6	0.3	0.3	0.15	1	1														Browsed	0.0424115	0.0353429	0.0706858	0.141372	0.212058	0.282743	0.353429	0.0353429	0.0424115	0.0424115	0.0424115	0.0424115	0.0424115	0	0	0	0	0	0	0.0424115	0	0	0	0	0	0	Com mos
1a	Cad ter	T	1	0.6	0.3	0.225	1	1															0.159043	0.0795216	0.159043	0.318086	0.477129	0.636173	0.795216	0.0795216	0.159043	0.159043	0.159043	0.159043	0.159043	0	0	0	0	0	0	0.159043	0	0	0	0	0	0	Cad ter
1a	Col mop	T	2.9	2.4	2.5	1.225	3	3	2		2	1											4.55265	1.97215	3.27229	4.41657	4.55284	4.80111	6.28138	1.97215	3.27229	4.41657	4.55265	4.55265	4.55265	18	18	5.5	0	0	0	7.11352	128.043	128.043	26.4969	0	0	0	Col mop
1a	Thy afr	T	0.5	0.4	0.2	0.15	1	1			2												0.0353429	0.0353429	0.0706858	0.141372	0.212058	0.282743	0.353429	0.0353429	0.0353429	0.0353429	0.0353429	0.0353429	0.0353429	0	18	0	0	0	0	0.0431011	0	0.77582	0	0	0	0	Thy afr
1a	Col mop	C	1.5	4	1	1.25	1	1	2														7.36311	2.45437	4.90874	9.81748	14.7262	19.635	24.5437	2.45437	4.90874	7.36311	7.36311	7.36311	7.36311	18	0	0	0	0	0	8.9794	161.629	0	0	0	0	0	Col mop
1a	Aca tor	T	0.3	0.2	0.3	0.125	1	1															0.0147262	0.0245437	0.0490874	0.0981748	0.147262	0.19635	0.245437	0.0147262	0.0147262	0.0147262	0.0147262	0.0147262	0.0147262	0	0	0	0	0	0	0.0147262	0	0	0	0	0	0	Aca tor
1a	Gre bic	T	1.9	2.4	2.2	1.15	7	7	1		1												6.2982	2.07738	4.13737	6.26106	0.538614	-19.3069	-59.5523	2.07738	4.13737	6.2982	6.2982	6.2982	6.2982	5.5	5.5	0	0	0	0	7.07662	38.9214	38.9214	0	0	0	0	Gre bic
1a	Dic cin	T	1.3	1	0.8	0.45	1	1															0.827024	0.318086	0.636173	1.27235	1.90852	2.54469	3.18086	0.318086	0.636173	0.827024	0.827024	0.827024	0.827024	0	0	0	0	0	0	0.827024	0	0	0	0	0	0	Dic cin
1a	Mae jun	T	0.8	0.2	0.1	0.075	1	1															0.0141372	0.00883573	0.0176715	0.0353429	0.0530144	0.0706858	0.0883573	0.00883573	0.0141372	0.0141372	0.0141372	0.0141372	0.0141372	0	0	0	0	0	0	0.0141372	0	0	0	0	0	0	Mae jun
1a	Gre bic	T	2.1	0.9	0.6	0.375	1	1															0.927752	0.220893	0.441786	0.883573	1.32536	1.76715	2.20893	0.220893	0.441786	0.883573	0.927752	0.927752	0.927752	0	0	0	0	0	0	0.927752	0	0	0	0	0	0	Gre bic
1a	Mae par	T	0.4	0.3	0.3	0.15	1	1															0.0282743	0.0353429	0.0706858	0.141372	0.212058	0.282743	0.353429	0.0282743	0.0282743	0.0282743	0.0282743	0.0282743	0.0282743	0	0	0	0	0	0	0.0282743	0	0	0	0	0	0	Mae par
1a	Mae par	T	0.2	0.3	0.2	0.125	1	1															0.00981748	0.0245437	0.0490874	0.0981748	0.147262	0.19635	0.245437	0.00981748	0.00981748	0.00981748	0.00981748	0.00981748	0.00981748	0	0	0	0	0	0	0.00981748	0	0	0	0	0	0	Mae par
1a	Mae par	T	0.2	0.1	0.1	0.05	1	1															0.0015708	0.00392699	0.00785398	0.015708	0.0235619	0.0314159	0.0392699	0.0015708	0.0015708	0.0015708	0.0015708	0.0015708	0.0015708	0	0	0	0	0	0	0.0015708	0	0	0	0	0	0	Mae par
1a	Mae par	T	0.1	0.1	0.1	0.05	1	1															0.000785398	0.00392699	0.00785398	0.015708	0.0235619	0.0314159	0.0392699	0.000785398	0.000785398	0.000785398	0.000785398	0.000785398	0.000785398	0	0	0	0	0	0	0.000785398	0	0	0	0	0	0	Mae par
1a	Com mos	T	0.3	0.7	0.5	0.3	1	1														Browsed	0.084823	0.141372	0.282743	0.565487	0.84823	1.13097	1.41372	0.084823	0.084823	0.084823	0.084823	0.084823	0.084823	0	0	0	0	0	0	0.084823	0	0	0	0	0	0	Com mos
1a	Mae par	T	0.2	0.2	0.2	0.1	1	1															0.00628319	0.015708	0.0314159	0.0628319	0.0942478	0.125664	0.15708	0.00628319	0.00628319	0.00628319	0.00628319	0.00628319	0.00628319	0	0	0	0	0	0	0.00628319	0	0	0	0	0	0	Mae par
1a	Mae par	T	0.3	0.6	0.3	0.225	1	1															0.0477129	0.0795216	0.159043	0.318086	0.477129	0.636173	0.795216	0.0477129	0.0477129	0.0477129	0.0477129	0.0477129	0.0477129	0	0	0	0	0	0	0.0477129	0	0	0	0	0	0	Mae par
1a	Cad ter	T	0.1	0.1	0.1	0.05	1	1															0.000785398	0.00392699	0.00785398	0.015708	0.0235619	0.0314159	0.0392699	0.000785398	0.000785398	0.000785398	0.000785398	0.000785398	0.000785398	0	0	0	0	0	0	0.000785398	0	0	0	0	0	0	Cad ter
1a	Mae par	T	0.2	0.1	0.1	0.05	1	1															0.0015708	0.00392699	0.00785398	0.015708	0.0235619	0.0314159	0.0392699	0.0015708	0.0015708	0.0015708	0.0015708	0.0015708	0.0015708	0	0	0	0	0	0	0.0015708	0	0	0	0	0	0	Mae par
1a	Mae par	T	0.1	0.1	0.2	0.075	1	1															0.00176715	0.00883573	0.0176715	0.0353429	0.0530144	0.0706858	0.0883573	0.00176715	0.00176715	0.00176715	0.00176715	0.00176715	0.00176715	0	0	0	0	0	0	0.00176715	0	0	0	0	0	0	Mae par
1a	Gre mon	T	1.8	0.8	0.8	0.4	1	1															0.904779	0.251327	0.502655	1.00531	1.50796	2.01062	2.51327	0.251327	0.502655	0.904779	0.904779	0.904779	0.904779	0	0	0	0	0	0	0.904779	0	0	0	0	0	0	Gre mon
1a	Mae par	T	0.5	0.2	0.1	0.075	1	1															0.00883573	0.00883573	0.0176715	0.0353429	0.0530144	0.0706858	0.0883573	0.00883573	0.00883573	0.00883573	0.00883573	0.00883573	0.00883573	0	0	0	0	0	0	0.00883573	0	0	0	0	0	0	Mae par
1a	Mae par	T	0.2	0.2	0.1	0.075	1	1															0.00353429	0.00883573	0.0176715	0.0353429	0.0530144	0.0706858	0.0883573	0.00353429	0.00353429	0.00353429	0.00353429	0.00353429	0.00353429	0	0	0	0	0	0	0.00353429	0	0	0	0	0	0	Mae par
1a	Mae par	T	0.3	0.4	0.2	0.15	1	1															0.0212058	0.0353429	0.0706858	0.141372	0.212058	0.282743	0.353429	0.0212058	0.0212058	0.0212058	0.0212058	0.0212058	0.0212058	0	0	0	0	0	0	0.0212058	0	0	0	0	0	0	Mae par
1	Dic cin	T	0.9	1.3	0.8	0.525	1	1															0.779311	0.432951	0.865901	1.7318	2.5977	3.46361	4.32951	0.432951	0.779311	0.779311	0.779311	0.779311	0.779311	0	0	0	0	0	0	0.779311	0	0	0	0	0	0	Dic cin
1	Dic cin	T	0.5	0.4	0.2	0.15	1	1															0.0353429	0.0353429	0.0706858	0.141372	0.212058	0.282743	0.353429	0.0353429	0.0353429	0.0353429	0.0353429	0.0353429	0.0353429	0	0	0	0	0	0	0.0353429	0	0	0	0	0	0	Dic cin
1	Mae par	T	0.7	1.3	1.3	0.65	1	1														Browsed	0.929126	0.663661	1.32732	2.65465	3.98197	5.30929	6.63661	0.663661	0.929126	0.929126	0.929126	0.929126	0.929126	0	0	0	0	0	0	0.929126	0	0	0	0	0	0	Mae par
1	Dic cin	T	0.9	1.2	0.8	0.5	1	1															0.706858	0.392699	0.785398	1.5708	2.35619	3.14159	3.92699	0.392699	0.706858	0.706858	0.706858	0.706858	0.706858	0	0	0	0	0	0	0.706858	0	0	0	0	0	0	Dic cin
1	Mae par	T	0.9	0.9	0.6	0.375	1	1			1											Browsed	0.397608	0.220893	0.441786	0.883573	1.32536	1.76715	2.20893	0.220893	0.397608	0.397608	0.397608	0.397608	0.397608	0	5.5	0	0	0	0	0.420749	0	2.31412	0	0	0	0	Mae par
1	Mae par	T	0.9	0.6	0.6	0.3	1	1			2											Browsed	0.254469	0.141372	0.282743	0.565487	0.84823	1.13097	1.41372	0.141372	0.254469	0.254469	0.254469	0.254469	0.254469	0	18	0	0	0	0	0.310328	0	5.5859	0	0	0	0	Mae par
1	Mae par	T	0.6	0.4	0.4	0.2	1	1															0.0753982	0.0628319	0.125664	0.251327	0.376991	0.502655	0.628319	0.0628319	0.0753982	0.0753982	0.0753982	0.0753982	0.0753982	0	0	0	0	0	0	0.0753982	0	0	0	0	0	0	Mae par
1	Dal mel	T	0.6	0.6	0.3	0.225	1	1			1												0.0954259	0.0795216	0.159043	0.318086	0.477129	0.636173	0.795216	0.0795216	0.0954259	0.0954259	0.0954259	0.0954259	0.0954259	0	5.5	0	0	0	0	0.10098	0	0.555389	0	0	0	0	Dal mel
1	Gre bic	T	0.5	0.5	0.3	0.2	1	1															0.0628319	0.0628319	0.125664	0.251327	0.376991	0.502655	0.628319	0.0628319	0.0628319	0.0628319	0.0628319	0.0628319	0.0628319	0	0	0	0	0	0	0.0628319	0	0	0	0	0	0	Gre bic
1	Gre mon	T	1.3	0.8	0.6	0.35	1	1			1												0.500299	0.192423	0.384845	0.76969	1.15454	1.53938	1.92423	0.192423	0.384845	0.500299	0.500299	0.500299	0.500299	0	5.5	0	0	0	0	0.529417	0	2.91179	0	0	0	0	Gre mon
1	Gre bic	T	0.5	0.6	0.5	0.275	1	1															0.118791	0.118791	0.237583	0.475166	0.712749	0.950332	1.18791	0.118791	0.118791	0.118791	0.118791	0.118791	0.118791	0	0	0	0	0	0	0.118791	0	0	0	0	0	0	Gre bic
1	Gre mon	T	0.8	0.7	0.5	0.3	1	1			1											Browsed	0.226195	0.141372	0.282743	0.565487	0.84823	1.13097	1.41372	0.141372	0.226195	0.226195	0.226195	0.226195	0.226195	0	5.5	0	0	0	0	0.239359	0	1.31648	0	0	0	0	Gre mon
1	Dic cin	T	1.7	0.8	1	0.45	3	3															0.360137	0.23347	0.334994	0.362116	0.521184	1.25201	2.99442	0.23347	0.334994	0.360137	0.360137	0.360137	0.360137	0	0	0	0	0	0	0.360137	0	0	0	0	0	0	Dic cin
1	Col mop	T	2.3	1.2	1.3	0.625	3	3	2														0.939901	0.489379	0.770182	0.937815	0.966397	1.31943	2.46041	0.489379	0.770182	0.937815	0.939901	0.939901	0.939901	18	0	0	0	0	0	1.14622	20.632	0	0	0	0	0	Col mop
1	Dic cin	T	1.4	1	0.8	0.45	3	3															0.296584	0.21779	0.289666	0.31993	0.739297	2.19628	5.33937	0.21779	0.289666	0.296584	0.296584	0.296584	0.296584	0	0	0	0	0	0	0.296584	0	0	0	0	0	0	Dic cin
1	Dic cin	T	1.5	1.1	1	0.525	3	3															0.432518	0.304364	0.416499	0.448537	0.865036	2.43491	5.9271	0.304364	0.416499	0.432518	0.432518	0.432518	0.432518	0	0	0	0	0	0	0.432518	0	0	0	0	0	0	Dic cin
1	Com mos	T	0.5	0.2	0.3	0.125	1	1														Browsed	0.0245437	0.0245437	0.0490874	0.0981748	0.147262	0.19635	0.245437	0.0245437	0.0245437	0.0245437	0.0245437	0.0245437	0.0245437	0	0	0	0	0	0	0.0245437	0	0	0	0	0	0	Com mos
1	Dic cin	T	2	1.4	1.3	0.675	1	1															2.86278	0.715694	1.43139	2.86278	4.29416	5.72555	7.15694	0.715694	1.43139	2.86278	2.86278	2.86278	2.86278	0	0	0	0	0	0	2.86278	0	0	0	0	0	0	Dic cin
1	Mae par	T	1.3	0.7	0.6	0.325	1	1															0.43138	0.165915	0.331831	0.663661	0.995492	1.32732	1.65915	0.165915	0.331831	0.43138	0.43138	0.43138	0.43138	0	0	0	0	0	0	0.43138	0	0	0	0	0	0	Mae par
1	Dic cin	T	1.4	1	0.6	0.4	3	3														Browsed	0.234338	0.172081	0.228872	0.252784	0.584136	1.73533	4.21876	0.172081	0.228872	0.234338	0.234338	0.234338	0.234338	0	0	0	0	0	0	0.234338	0	0	0	0	0	0	Dic cin
1	Dic cin	T	0.7	0.7	0.7	0.35	3	3														Browsed	0.0897074	0.0876151	0.0967689	0.664305	3.27184	9.48858	20.8838	0.0876151	0.0897074	0.0897074	0.0897074	0.0897074	0.0897074	0	0	0	0	0	0	0.0897074	0	0	0	0	0	0	Dic cin
1	Aca tor	T	0.5	1.1	0.8	0.475	1	1															0.354411	0.354411	0.708822	1.41764	2.12647	2.83529	3.54411	0.354411	0.354411	0.354411	0.354411	0.354411	0.354411	0	0	0	0	0	0	0.354411	0	0	0	0	0	0	Aca tor
1	Gre mon	T	1.5	1.1	1.4	0.625	1	1															1.84078	0.613592	1.22718	2.45437	3.68155	4.90874	6.13592	0.613592	1.22718	1.84078	1.84078	1.84078	1.84078	0	0	0	0	0	0	1.84078	0	0	0	0	0	0	Gre mon
1	Dic cin	T	1.5	1.6	1.8	0.85	3	3															1.13377	0.797835	1.09177	1.17576	2.26753	6.38268	15.5368	0.797835	1.09177	1.13377	1.13377	1.13377	1.13377	0	0	0	0	0	0	1.13377	0	0	0	0	0	0	Dic cin
1	Cad ter	T	0.7	0.1	0.1	0.05	1	1															0.00549779	0.00392699	0.00785398	0.015708	0.0235619	0.0314159	0.0392699	0.00392699	0.00549779	0.00549779	0.00549779	0.00549779	0.00549779	0	0	0	0	0	0	0.00549779	0	0	0	0	0	0	Cad ter
1	Com mos	T	0.7	0.5	0.2	0.175	1	1														Browsed	0.0673479	0.0481056	0.0962113	0.192423	0.288634	0.384845	0.481056	0.0481056	0.0673479	0.0673479	0.0673479	0.0673479	0.0673479	0	0	0	0	0	0	0.0673479	0	0	0	0	0	0	Com mos
1	Com mos	T	0.7	0.3	0.2	0.125	1	1															0.0343612	0.0245437	0.0490874	0.0981748	0.147262	0.19635	0.245437	0.0245437	0.0343612	0.0343612	0.0343612	0.0343612	0.0343612	0	0	0	0	0	0	0.0343612	0	0	0	0	0	0	Com mos
1	Aca tor	T	0.5	0.4	0.6	0.25	1	1															0.0981748	0.0981748	0.19635	0.392699	0.589049	0.785398	0.981748	0.0981748	0.0981748	0.0981748	0.0981748	0.0981748	0.0981748	0	0	0	0	0	0	0.0981748	0	0	0	0	0	0	Aca tor
1	Com mos	T	0.8	0.3	0.2	0.125	1	1														Browsed	0.0392699	0.0245437	0.0490874	0.0981748	0.147262	0.19635	0.245437	0.0245437	0.0392699	0.0392699	0.0392699	0.0392699	0.0392699	0	0	0	0	0	0	0.0392699	0	0	0	0	0	0	Com mos
1	Com mos	T	0.5	0.3	0.2	0.125	1	1														Browsed	0.0245437	0.0245437	0.0490874	0.0981748	0.147262	0.19635	0.245437	0.0245437	0.0245437	0.0245437	0.0245437	0.0245437	0.0245437	0	0	0	0	0	0	0.0245437	0	0	0	0	0	0	Com mos
1	Gre bic	T	0.6	0.5	0.3	0.2	1	1															0.0753982	0.0628319	0.125664	0.251327	0.376991	0.502655	0.628319	0.0628319	0.0753982	0.0753982	0.0753982	0.0753982	0.0753982	0	0	0	0	0	0	0.0753982	0	0	0	0	0	0	Gre bic
2	Gre ina	T	1.3	0.6	0.7	0.325	1	1														Browsed	0.43138	0.165915	0.331831	0.663661	0.995492	1.32732	1.65915	0.165915	0.331831	0.43138	0.43138	0.43138	0.43138	0	0	0	0	0	0	0.43138	0	0	0	0	0	0	Gre ina
2	Gre ina	T	1.6	1	0.7	0.425	1	1														Browsed	0.90792	0.283725	0.56745	1.1349	1.70235	2.2698	2.83725	0.283725	0.56745	0.90792	0.90792	0.90792	0.90792	0	0	0	0	0	0	0.90792	0	0	0	0	0	0	Gre ina
2	Col mop	T	1	0.8	0.8	0.4	1	1															0.502655	0.251327	0.502655	1.00531	1.50796	2.01062	2.51327	0.251327	0.502655	0.502655	0.502655	0.502655	0.502655	0	0	0	0	0	0	0.502655	0	0	0	0	0	0	Col mop
2	Gre ina	T	2.3	1.3	1.3	0.65	2	2														Browsed	1.0166	0.0104442	0.0835536	0.668429	2.25595	5.34743	10.4442	0.0104442	0.0835536	0.668429	1.0166	1.0166	1.0166	0	0	0	0	0	0	1.0166	0	0	0	0	0	0	Gre ina
2	Gre fla	T	2	2.4	2	1.1	3	3			1											Browsed	2.53168	1.46363	2.21522	2.53168	2.84814	5.06337	11.0761	1.46363	2.21522	2.53168	2.53168	2.53168	2.53168	0	5.5	0	0	0	0	2.67903	0	14.7347	0	0	0	0	Gre fla
2	Sec vir	T	1.2	0.9	0.9	0.45	1	1														Browsed	0.763407	0.318086	0.636173	1.27235	1.90852	2.54469	3.18086	0.318086	0.636173	0.763407	0.763407	0.763407	0.763407	0	0	0	0	0	0	0.763407	0	0	0	0	0	0	Sec vir
2	Aca tor	T	0.6	0.6	0.2	0.2	1	1															0.0753982	0.0628319	0.125664	0.251327	0.376991	0.502655	0.628319	0.0628319	0.0753982	0.0753982	0.0753982	0.0753982	0.0753982	0	0	0	0	0	0	0.0753982	0	0	0	0	0	0	Aca tor
2	Dal mel	T	1.3	1.3	0.4	0.425	3	3															0.245649	0.188402	0.24263	0.284	0.794978	2.44643	5.90922	0.188402	0.24263	0.245649	0.245649	0.245649	0.245649	0	0	0	0	0	0	0.245649	0	0	0	0	0	0	Dal mel
2	Col mop	T	1.6	0.7	1	0.425	3	3			2												0.302337	0.204093	0.286394	0.307061	0.50488	1.32273	3.20348	0.204093	0.286394	0.302337	0.302337	0.302337	0.302337	0	18	0	0	0	0	0.368704	0	6.63668	0	0	0	0	Col mop
2	Pte bre	T	0.6	0.4	0.4	0.2	3	3															0.0251076	0.0249914	0.0325469	0.344067	1.63199	4.59376	9.9268	0.0249914	0.0251076	0.0251076	0.0251076	0.0251076	0.0251076	0	0	0	0	0	0	0.0251076	0	0	0	0	0	0	Pte bre
2	Dal mel	T	1.7	0.8	0.6	0.35	1	1			1												0.654237	0.192423	0.384845	0.76969	1.15454	1.53938	1.92423	0.192423	0.384845	0.654237	0.654237	0.654237	0.654237	0	5.5	0	0	0	0	0.692314	0	3.80773	0	0	0	0	Dal mel
						#DIV/0!		#DIV/0!															#DIV/0!	#DIV/0!	#DIV/0!	#DIV/0!	#DIV/0!	#DIV/0!	#DIV/0!	#DIV/0!	#DIV/0!	#DIV/0!	#DIV/0!	#DIV/0!	#DIV/0!	0	0	0	0	0	0	#DIV/0!	#DIV/0!	#DIV/0!	#DIV/0!	#DIV/0!	#DIV/0!	#DIV/0!	0
						#DIV/0!		#DIV/0!															#DIV/0!	#DIV/0!	#DIV/0!	#DIV/0!	#DIV/0!	#DIV/0!	#DIV/0!	#DIV/0!	#DIV/0!	#DIV/0!	#DIV/0!	#DIV/0!	#DIV/0!	0	0	0	0	0	0	#DIV/0!	#DIV/0!	#DIV/0!	#DIV/0!	#DIV/0!	#DIV/0!	#DIV/0!	0
						#DIV/0!		#DIV/0!															#DIV/0!	#DIV/0!	#DIV/0!	#DIV/0!	#DIV/0!	#DIV/0!	#DIV/0!	#DIV/0!	#DIV/0!	#DIV/0!	#DIV/0!	#DIV/0!	#DIV/0!	0	0	0	0	0	0	#DIV/0!	#DIV/0!	#DIV/0!	#DIV/0!	#DIV/0!	#DIV/0!	#DIV/0!	0
						#DIV/0!		#DIV/0!															#DIV/0!	#DIV/0!	#DIV/0!	#DIV/0!	#DIV/0!	#DIV/0!	#DIV/0!	#DIV/0!	#DIV/0!	#DIV/0!	#DIV/0!	#DIV/0!	#DIV/0!	0	0	0	0	0	0	#DIV/0!	#DIV/0!	#DIV/0!	#DIV/0!	#DIV/0!	#DIV/0!	#DIV/0!	0
						#DIV/0!		#DIV/0!															#DIV/0!	#DIV/0!	#DIV/0!	#DIV/0!	#DIV/0!	#DIV/0!	#DIV/0!	#DIV/0!	#DIV/0!	#DIV/0!	#DIV/0!	#DIV/0!	#DIV/0!	0	0	0	0	0	0	#DIV/0!	#DIV/0!	#DIV/0!	#DIV/0!	#DIV/0!	#DIV/0!	#DIV/0!	0
						#DIV/0!		#DIV/0!															#DIV/0!	#DIV/0!	#DIV/0!	#DIV/0!	#DIV/0!	#DIV/0!	#DIV/0!	#DIV/0!	#DIV/0!	#DIV/0!	#DIV/0!	#DIV/0!	#DIV/0!	0	0	0	0	0	0	#DIV/0!	#DIV/0!	#DIV/0!	#DIV/0!	#DIV/0!	#DIV/0!	#DIV/0!	0
						#DIV/0!		#DIV/0!															#DIV/0!	#DIV/0!	#DIV/0!	#DIV/0!	#DIV/0!	#DIV/0!	#DIV/0!	#DIV/0!	#DIV/0!	#DIV/0!	#DIV/0!	#DIV/0!	#DIV/0!	0	0	0	0	0	0	#DIV/0!	#DIV/0!	#DIV/0!	#DIV/0!	#DIV/0!	#DIV/0!	#DIV/0!	0
						#DIV/0!		#DIV/0!															#DIV/0!	#DIV/0!	#DIV/0!	#DIV/0!	#DIV/0!	#DIV/0!	#DIV/0!	#DIV/0!	#DIV/0!	#DIV/0!	#DIV/0!	#DIV/0!	#DIV/0!	0	0	0	0	0	0	#DIV/0!	#DIV/0!	#DIV/0!	#DIV/0!	#DIV/0!	#DIV/0!	#DIV/0!	0
						#DIV/0!		#DIV/0!															#DIV/0!	#DIV/0!	#DIV/0!	#DIV/0!	#DIV/0!	#DIV/0!	#DIV/0!	#DIV/0!	#DIV/0!	#DIV/0!	#DIV/0!	#DIV/0!	#DIV/0!	0	0	0	0	0	0	#DIV/0!	#DIV/0!	#DIV/0!	#DIV/0!	#DIV/0!	#DIV/0!	#DIV/0!	0
						#DIV/0!		#DIV/0!															#DIV/0!	#DIV/0!	#DIV/0!	#DIV/0!	#DIV/0!	#DIV/0!	#DIV/0!	#DIV/0!	#DIV/0!	#DIV/0!	#DIV/0!	#DIV/0!	#DIV/0!	0	0	0	0	0	0	#DIV/0!	#DIV/0!	#DIV/0!	#DIV/0!	#DIV/0!	#DIV/0!	#DIV/0!	0
						#DIV/0!		#DIV/0!															#DIV/0!	#DIV/0!	#DIV/0!	#DIV/0!	#DIV/0!	#DIV/0!	#DIV/0!	#DIV/0!	#DIV/0!	#DIV/0!	#DIV/0!	#DIV/0!	#DIV/0!	0	0	0	0	0	0	#DIV/0!	#DIV/0!	#DIV/0!	#DIV/0!	#DIV/0!	#DIV/0!	#DIV/0!	0
						#DIV/0!		#DIV/0!															#DIV/0!	#DIV/0!	#DIV/0!	#DIV/0!	#DIV/0!	#DIV/0!	#DIV/0!	#DIV/0!	#DIV/0!	#DIV/0!	#DIV/0!	#DIV/0!	#DIV/0!	0	0	0	0	0	0	#DIV/0!	#DIV/0!	#DIV/0!	#DIV/0!	#DIV/0!	#DIV/0!	#DIV/0!	0
						#DIV/0!		#DIV/0!															#DIV/0!	#DIV/0!	#DIV/0!	#DIV/0!	#DIV/0!	#DIV/0!	#DIV/0!	#DIV/0!	#DIV/0!	#DIV/0!	#DIV/0!	#DIV/0!	#DIV/0!	0	0	0	0	0	0	#DIV/0!	#DIV/0!	#DIV/0!	#DIV/0!	#DIV/0!	#DIV/0!	#DIV/0!	0
						#DIV/0!		#DIV/0!															#DIV/0!	#DIV/0!	#DIV/0!	#DIV/0!	#DIV/0!	#DIV/0!	#DIV/0!	#DIV/0!	#DIV/0!	#DIV/0!	#DIV/0!	#DIV/0!	#DIV/0!	0	0	0	0	0	0	#DIV/0!	#DIV/0!	#DIV/0!	#DIV/0!	#DIV/0!	#DIV/0!	#DIV/0!	0
						#DIV/0!		#DIV/0!															#DIV/0!	#DIV/0!	#DIV/0!	#DIV/0!	#DIV/0!	#DIV/0!	#DIV/0!	#DIV/0!	#DIV/0!	#DIV/0!	#DIV/0!	#DIV/0!	#DIV/0!	0	0	0	0	0	0	#DIV/0!	#DIV/0!	#DIV/0!	#DIV/0!	#DIV/0!	#DIV/0!	#DIV/0!	0
						#DIV/0!		#DIV/0!															#DIV/0!	#DIV/0!	#DIV/0!	#DIV/0!	#DIV/0!	#DIV/0!	#DIV/0!	#DIV/0!	#DIV/0!	#DIV/0!	#DIV/0!	#DIV/0!	#DIV/0!	0	0	0	0	0	0	#DIV/0!	#DIV/0!	#DIV/0!	#DIV/0!	#DIV/0!	#DIV/0!	#DIV/0!	0
						#DIV/0!		#DIV/0!															#DIV/0!	#DIV/0!	#DIV/0!	#DIV/0!	#DIV/0!	#DIV/0!	#DIV/0!	#DIV/0!	#DIV/0!	#DIV/0!	#DIV/0!	#DIV/0!	#DIV/0!	0	0	0	0	0	0	#DIV/0!	#DIV/0!	#DIV/0!	#DIV/0!	#DIV/0!	#DIV/0!	#DIV/0!	0
						#DIV/0!		#DIV/0!															#DIV/0!	#DIV/0!	#DIV/0!	#DIV/0!	#DIV/0!	#DIV/0!	#DIV/0!	#DIV/0!	#DIV/0!	#DIV/0!	#DIV/0!	#DIV/0!	#DIV/0!	0	0	0	0	0	0	#DIV/0!	#DIV/0!	#DIV/0!	#DIV/0!	#DIV/0!	#DIV/0!	#DIV/0!	0
						#DIV/0!		#DIV/0!															#DIV/0!	#DIV/0!	#DIV/0!	#DIV/0!	#DIV/0!	#DIV/0!	#DIV/0!	#DIV/0!	#DIV/0!	#DIV/0!	#DIV/0!	#DIV/0!	#DIV/0!	0	0	0	0	0	0	#DIV/0!	#DIV/0!	#DIV/0!	#DIV/0!	#DIV/0!	#DIV/0!	#DIV/0!	0
						#DIV/0!		#DIV/0!															#DIV/0!	#DIV/0!	#DIV/0!	#DIV/0!	#DIV/0!	#DIV/0!	#DIV/0!	#DIV/0!	#DIV/0!	#DIV/0!	#DIV/0!	#DIV/0!	#DIV/0!	0	0	0	0	0	0	#DIV/0!	#DIV/0!	#DIV/0!	#DIV/0!	#DIV/0!	#DIV/0!	#DIV/0!	0
						#DIV/0!		#DIV/0!															#DIV/0!	#DIV/0!	#DIV/0!	#DIV/0!	#DIV/0!	#DIV/0!	#DIV/0!	#DIV/0!	#DIV/0!	#DIV/0!	#DIV/0!	#DIV/0!	#DIV/0!	0	0	0	0	0	0	#DIV/0!	#DIV/0!	#DIV/0!	#DIV/0!	#DIV/0!	#DIV/0!	#DIV/0!	0
						#DIV/0!		#DIV/0!															#DIV/0!	#DIV/0!	#DIV/0!	#DIV/0!	#DIV/0!	#DIV/0!	#DIV/0!	#DIV/0!	#DIV/0!	#DIV/0!	#DIV/0!	#DIV/0!	#DIV/0!	0	0	0	0	0	0	#DIV/0!	#DIV/0!	#DIV/0!	#DIV/0!	#DIV/0!	#DIV/0!	#DIV/0!	0
						#DIV/0!		#DIV/0!															#DIV/0!	#DIV/0!	#DIV/0!	#DIV/0!	#DIV/0!	#DIV/0!	#DIV/0!	#DIV/0!	#DIV/0!	#DIV/0!	#DIV/0!	#DIV/0!	#DIV/0!	0	0	0	0	0	0	#DIV/0!	#DIV/0!	#DIV/0!	#DIV/0!	#DIV/0!	#DIV/0!	#DIV/0!	0
						#DIV/0!		#DIV/0!															#DIV/0!	#DIV/0!	#DIV/0!	#DIV/0!	#DIV/0!	#DIV/0!	#DIV/0!	#DIV/0!	#DIV/0!	#DIV/0!	#DIV/0!	#DIV/0!	#DIV/0!	0	0	0	0	0	0	#DIV/0!	#DIV/0!	#DIV/0!	#DIV/0!	#DIV/0!	#DIV/0!	#DIV/0!	0
						#DIV/0!		#DIV/0!															#DIV/0!	#DIV/0!	#DIV/0!	#DIV/0!	#DIV/0!	#DIV/0!	#DIV/0!	#DIV/0!	#DIV/0!	#DIV/0!	#DIV/0!	#DIV/0!	#DIV/0!	0	0	0	0	0	0	#DIV/0!	#DIV/0!	#DIV/0!	#DIV/0!	#DIV/0!	#DIV/0!	#DIV/0!	0
						#DIV/0!		#DIV/0!															#DIV/0!	#DIV/0!	#DIV/0!	#DIV/0!	#DIV/0!	#DIV/0!	#DIV/0!	#DIV/0!	#DIV/0!	#DIV/0!	#DIV/0!	#DIV/0!	#DIV/0!	0	0	0	0	0	0	#DIV/0!	#DIV/0!	#DIV/0!	#DIV/0!	#DIV/0!	#DIV/0!	#DIV/0!	0
						#DIV/0!		#DIV/0!															#DIV/0!	#DIV/0!	#DIV/0!	#DIV/0!	#DIV/0!	#DIV/0!	#DIV/0!	#DIV/0!	#DIV/0!	#DIV/0!	#DIV/0!	#DIV/0!	#DIV/0!	0	0	0	0	0	0	#DIV/0!	#DIV/0!	#DIV/0!	#DIV/0!	#DIV/0!	#DIV/0!	#DIV/0!	0
						#DIV/0!		#DIV/0!															#DIV/0!	#DIV/0!	#DIV/0!	#DIV/0!	#DIV/0!	#DIV/0!	#DIV/0!	#DIV/0!	#DIV/0!	#DIV/0!	#DIV/0!	#DIV/0!	#DIV/0!	0	0	0	0	0	0	#DIV/0!	#DIV/0!	#DIV/0!	#DIV/0!	#DIV/0!	#DIV/0!	#DIV/0!	0
						#DIV/0!		#DIV/0!															#DIV/0!	#DIV/0!	#DIV/0!	#DIV/0!	#DIV/0!	#DIV/0!	#DIV/0!	#DIV/0!	#DIV/0!	#DIV/0!	#DIV/0!	#DIV/0!	#DIV/0!	0	0	0	0	0	0	#DIV/0!	#DIV/0!	#DIV/0!	#DIV/0!	#DIV/0!	#DIV/0!	#DIV/0!	0
						#DIV/0!		#DIV/0!															#DIV/0!	#DIV/0!	#DIV/0!	#DIV/0!	#DIV/0!	#DIV/0!	#DIV/0!	#DIV/0!	#DIV/0!	#DIV/0!	#DIV/0!	#DIV/0!	#DIV/0!	0	0	0	0	0	0	#DIV/0!	#DIV/0!	#DIV/0!	#DIV/0!	#DIV/0!	#DIV/0!	#DIV/0!	0
						#DIV/0!		#DIV/0!															#DIV/0!	#DIV/0!	#DIV/0!	#DIV/0!	#DIV/0!	#DIV/0!	#DIV/0!	#DIV/0!	#DIV/0!	#DIV/0!	#DIV/0!	#DIV/0!	#DIV/0!	0	0	0	0	0	0	#DIV/0!	#DIV/0!	#DIV/0!	#DIV/0!	#DIV/0!	#DIV/0!	#DIV/0!	0
						#DIV/0!		#DIV/0!															#DIV/0!	#DIV/0!	#DIV/0!	#DIV/0!	#DIV/0!	#DIV/0!	#DIV/0!	#DIV/0!	#DIV/0!	#DIV/0!	#DIV/0!	#DIV/0!	#DIV/0!	0	0	0	0	0	0	#DIV/0!	#DIV/0!	#DIV/0!	#DIV/0!	#DIV/0!	#DIV/0!	#DIV/0!	0
						#DIV/0!		#DIV/0!															#DIV/0!	#DIV/0!	#DIV/0!	#DIV/0!	#DIV/0!	#DIV/0!	#DIV/0!	#DIV/0!	#DIV/0!	#DIV/0!	#DIV/0!	#DIV/0!	#DIV/0!	0	0	0	0	0	0	#DIV/0!	#DIV/0!	#DIV/0!	#DIV/0!	#DIV/0!	#DIV/0!	#DIV/0!	0
						#DIV/0!		#DIV/0!															#DIV/0!	#DIV/0!	#DIV/0!	#DIV/0!	#DIV/0!	#DIV/0!	#DIV/0!	#DIV/0!	#DIV/0!	#DIV/0!	#DIV/0!	#DIV/0!	#DIV/0!	0	0	0	0	0	0	#DIV/0!	#DIV/0!	#DIV/0!	#DIV/0!	#DIV/0!	#DIV/0!	#DIV/0!	0
						#DIV/0!		#DIV/0!															#DIV/0!	#DIV/0!	#DIV/0!	#DIV/0!	#DIV/0!	#DIV/0!	#DIV/0!	#DIV/0!	#DIV/0!	#DIV/0!	#DIV/0!	#DIV/0!	#DIV/0!	0	0	0	0	0	0	#DIV/0!	#DIV/0!	#DIV/0!	#DIV/0!	#DIV/0!	#DIV/0!	#DIV/0!	0
						#DIV/0!		#DIV/0!															#DIV/0!	#DIV/0!	#DIV/0!	#DIV/0!	#DIV/0!	#DIV/0!	#DIV/0!	#DIV/0!	#DIV/0!	#DIV/0!	#DIV/0!	#DIV/0!	#DIV/0!	0	0	0	0	0	0	#DIV/0!	#DIV/0!	#DIV/0!	#DIV/0!	#DIV/0!	#DIV/0!	#DIV/0!	0
						#DIV/0!		#DIV/0!															#DIV/0!	#DIV/0!	#DIV/0!	#DIV/0!	#DIV/0!	#DIV/0!	#DIV/0!	#DIV/0!	#DIV/0!	#DIV/0!	#DIV/0!	#DIV/0!	#DIV/0!	0	0	0	0	0	0	#DIV/0!	#DIV/0!	#DIV/0!	#DIV/0!	#DIV/0!	#DIV/0!	#DIV/0!	0
						#DIV/0!		#DIV/0!															#DIV/0!	#DIV/0!	#DIV/0!	#DIV/0!	#DIV/0!	#DIV/0!	#DIV/0!	#DIV/0!	#DIV/0!	#DIV/0!	#DIV/0!	#DIV/0!	#DIV/0!	0	0	0	0	0	0	#DIV/0!	#DIV/0!	#DIV/0!	#DIV/0!	#DIV/0!	#DIV/0!	#DIV/0!	0
						#DIV/0!		#DIV/0!															#DIV/0!	#DIV/0!	#DIV/0!	#DIV/0!	#DIV/0!	#DIV/0!	#DIV/0!	#DIV/0!	#DIV/0!	#DIV/0!	#DIV/0!	#DIV/0!	#DIV/0!	0	0	0	0	0	0	#DIV/0!	#DIV/0!	#DIV/0!	#DIV/0!	#DIV/0!	#DIV/0!	#DIV/0!	0
						#DIV/0!		#DIV/0!															#DIV/0!	#DIV/0!	#DIV/0!	#DIV/0!	#DIV/0!	#DIV/0!	#DIV/0!	#DIV/0!	#DIV/0!	#DIV/0!	#DIV/0!	#DIV/0!	#DIV/0!	0	0	0	0	0	0	#DIV/0!	#DIV/0!	#DIV/0!	#DIV/0!	#DIV/0!	#DIV/0!	#DIV/0!	0
						#DIV/0!		#DIV/0!															#DIV/0!	#DIV/0!	#DIV/0!	#DIV/0!	#DIV/0!	#DIV/0!	#DIV/0!	#DIV/0!	#DIV/0!	#DIV/0!	#DIV/0!	#DIV/0!	#DIV/0!	0	0	0	0	0	0	#DIV/0!	#DIV/0!	#DIV/0!	#DIV/0!	#DIV/0!	#DIV/0!	#DIV/0!	0
						#DIV/0!		#DIV/0!															#DIV/0!	#DIV/0!	#DIV/0!	#DIV/0!	#DIV/0!	#DIV/0!	#DIV/0!	#DIV/0!	#DIV/0!	#DIV/0!	#DIV/0!	#DIV/0!	#DIV/0!	0	0	0	0	0	0	#DIV/0!	#DIV/0!	#DIV/0!	#DIV/0!	#DIV/0!	#DIV/0!	#DIV/0!	0
						#DIV/0!		#DIV/0!															#DIV/0!	#DIV/0!	#DIV/0!	#DIV/0!	#DIV/0!	#DIV/0!	#DIV/0!	#DIV/0!	#DIV/0!	#DIV/0!	#DIV/0!	#DIV/0!	#DIV/0!	0	0	0	0	0	0	#DIV/0!	#DIV/0!	#DIV/0!	#DIV/0!	#DIV/0!	#DIV/0!	#DIV/0!	0
						#DIV/0!		#DIV/0!															#DIV/0!	#DIV/0!	#DIV/0!	#DIV/0!	#DIV/0!	#DIV/0!	#DIV/0!	#DIV/0!	#DIV/0!	#DIV/0!	#DIV/0!	#DIV/0!	#DIV/0!	0	0	0	0	0	0	#DIV/0!	#DIV/0!	#DIV/0!	#DIV/0!	#DIV/0!	#DIV/0!	#DIV/0!	0
						#DIV/0!		#DIV/0!															#DIV/0!	#DIV/0!	#DIV/0!	#DIV/0!	#DIV/0!	#DIV/0!	#DIV/0!	#DIV/0!	#DIV/0!	#DIV/0!	#DIV/0!	#DIV/0!	#DIV/0!	0	0	0	0	0	0	#DIV/0!	#DIV/0!	#DIV/0!	#DIV/0!	#DIV/0!	#DIV/0!	#DIV/0!	0
						#DIV/0!		#DIV/0!															#DIV/0!	#DIV/0!	#DIV/0!	#DIV/0!	#DIV/0!	#DIV/0!	#DIV/0!	#DIV/0!	#DIV/0!	#DIV/0!	#DIV/0!	#DIV/0!	#DIV/0!	0	0	0	0	0	0	#DIV/0!	#DIV/0!	#DIV/0!	#DIV/0!	#DIV/0!	#DIV/0!	#DIV/0!	0
						#DIV/0!		#DIV/0!															#DIV/0!	#DIV/0!	#DIV/0!	#DIV/0!	#DIV/0!	#DIV/0!	#DIV/0!	#DIV/0!	#DIV/0!	#DIV/0!	#DIV/0!	#DIV/0!	#DIV/0!	0	0	0	0	0	0	#DIV/0!	#DIV/0!	#DIV/0!	#DIV/0!	#DIV/0!	#DIV/0!	#DIV/0!	0
						#DIV/0!		#DIV/0!															#DIV/0!	#DIV/0!	#DIV/0!	#DIV/0!	#DIV/0!	#DIV/0!	#DIV/0!	#DIV/0!	#DIV/0!	#DIV/0!	#DIV/0!	#DIV/0!	#DIV/0!	0	0	0	0	0	0	#DIV/0!	#DIV/0!	#DIV/0!	#DIV/0!	#DIV/0!	#DIV/0!	#DIV/0!	0
						#DIV/0!		#DIV/0!															#DIV/0!	#DIV/0!	#DIV/0!	#DIV/0!	#DIV/0!	#DIV/0!	#DIV/0!	#DIV/0!	#DIV/0!	#DIV/0!	#DIV/0!	#DIV/0!	#DIV/0!	0	0	0	0	0	0	#DIV/0!	#DIV/0!	#DIV/0!	#DIV/0!	#DIV/0!	#DIV/0!	#DIV/0!	0
						#DIV/0!		#DIV/0!															#DIV/0!	#DIV/0!	#DIV/0!	#DIV/0!	#DIV/0!	#DIV/0!	#DIV/0!	#DIV/0!	#DIV/0!	#DIV/0!	#DIV/0!	#DIV/0!	#DIV/0!	0	0	0	0	0	0	#DIV/0!	#DIV/0!	#DIV/0!	#DIV/0!	#DIV/0!	#DIV/0!	#DIV/0!	0
						#DIV/0!		#DIV/0!															#DIV/0!	#DIV/0!	#DIV/0!	#DIV/0!	#DIV/0!	#DIV/0!	#DIV/0!	#DIV/0!	#DIV/0!	#DIV/0!	#DIV/0!	#DIV/0!	#DIV/0!	0	0	0	0	0	0	#DIV/0!	#DIV/0!	#DIV/0!	#DIV/0!	#DIV/0!	#DIV/0!	#DIV/0!	0
						#DIV/0!		#DIV/0!															#DIV/0!	#DIV/0!	#DIV/0!	#DIV/0!	#DIV/0!	#DIV/0!	#DIV/0!	#DIV/0!	#DIV/0!	#DIV/0!	#DIV/0!	#DIV/0!	#DIV/0!	0	0	0	0	0	0	#DIV/0!	#DIV/0!	#DIV/0!	#DIV/0!	#DIV/0!	#DIV/0!	#DIV/0!	0
						#DIV/0!		#DIV/0!															#DIV/0!	#DIV/0!	#DIV/0!	#DIV/0!	#DIV/0!	#DIV/0!	#DIV/0!	#DIV/0!	#DIV/0!	#DIV/0!	#DIV/0!	#DIV/0!	#DIV/0!	0	0	0	0	0	0	#DIV/0!	#DIV/0!	#DIV/0!	#DIV/0!	#DIV/0!	#DIV/0!	#DIV/0!	0
						#DIV/0!		#DIV/0!															#DIV/0!	#DIV/0!	#DIV/0!	#DIV/0!	#DIV/0!	#DIV/0!	#DIV/0!	#DIV/0!	#DIV/0!	#DIV/0!	#DIV/0!	#DIV/0!	#DIV/0!	0	0	0	0	0	0	#DIV/0!	#DIV/0!	#DIV/0!	#DIV/0!	#DIV/0!	#DIV/0!	#DIV/0!	0
						#DIV/0!		#DIV/0!															#DIV/0!	#DIV/0!	#DIV/0!	#DIV/0!	#DIV/0!	#DIV/0!	#DIV/0!	#DIV/0!	#DIV/0!	#DIV/0!	#DIV/0!	#DIV/0!	#DIV/0!	0	0	0	0	0	0	#DIV/0!	#DIV/0!	#DIV/0!	#DIV/0!	#DIV/0!	#DIV/0!	#DIV/0!	0
						#DIV/0!		#DIV/0!															#DIV/0!	#DIV/0!	#DIV/0!	#DIV/0!	#DIV/0!	#DIV/0!	#DIV/0!	#DIV/0!	#DIV/0!	#DIV/0!	#DIV/0!	#DIV/0!	#DIV/0!	0	0	0	0	0	0	#DIV/0!	#DIV/0!	#DIV/0!	#DIV/0!	#DIV/0!	#DIV/0!	#DIV/0!	0
						#DIV/0!		#DIV/0!															#DIV/0!	#DIV/0!	#DIV/0!	#DIV/0!	#DIV/0!	#DIV/0!	#DIV/0!	#DIV/0!	#DIV/0!	#DIV/0!	#DIV/0!	#DIV/0!	#DIV/0!	0	0	0	0	0	0	#DIV/0!	#DIV/0!	#DIV/0!	#DIV/0!	#DIV/0!	#DIV/0!	#DIV/0!	0
						#DIV/0!		#DIV/0!															#DIV/0!	#DIV/0!	#DIV/0!	#DIV/0!	#DIV/0!	#DIV/0!	#DIV/0!	#DIV/0!	#DIV/0!	#DIV/0!	#DIV/0!	#DIV/0!	#DIV/0!	0	0	0	0	0	0	#DIV/0!	#DIV/0!	#DIV/0!	#DIV/0!	#DIV/0!	#DIV/0!	#DIV/0!	0
						#DIV/0!		#DIV/0!															#DIV/0!	#DIV/0!	#DIV/0!	#DIV/0!	#DIV/0!	#DIV/0!	#DIV/0!	#DIV/0!	#DIV/0!	#DIV/0!	#DIV/0!	#DIV/0!	#DIV/0!	0	0	0	0	0	0	#DIV/0!	#DIV/0!	#DIV/0!	#DIV/0!	#DIV/0!	#DIV/0!	#DIV/0!	0
						#DIV/0!		#DIV/0!															#DIV/0!	#DIV/0!	#DIV/0!	#DIV/0!	#DIV/0!	#DIV/0!	#DIV/0!	#DIV/0!	#DIV/0!	#DIV/0!	#DIV/0!	#DIV/0!	#DIV/0!	0	0	0	0	0	0	#DIV/0!	#DIV/0!	#DIV/0!	#DIV/0!	#DIV/0!	#DIV/0!	#DIV/0!	0
						#DIV/0!		#DIV/0!															#DIV/0!	#DIV/0!	#DIV/0!	#DIV/0!	#DIV/0!	#DIV/0!	#DIV/0!	#DIV/0!	#DIV/0!	#DIV/0!	#DIV/0!	#DIV/0!	#DIV/0!	0	0	0	0	0	0	#DIV/0!	#DIV/0!	#DIV/0!	#DIV/0!	#DIV/0!	#DIV/0!	#DIV/0!	0
						#DIV/0!		#DIV/0!															#DIV/0!	#DIV/0!	#DIV/0!	#DIV/0!	#DIV/0!	#DIV/0!	#DIV/0!	#DIV/0!	#DIV/0!	#DIV/0!	#DIV/0!	#DIV/0!	#DIV/0!	0	0	0	0	0	0	#DIV/0!	#DIV/0!	#DIV/0!	#DIV/0!	#DIV/0!	#DIV/0!	#DIV/0!	0
						#DIV/0!		#DIV/0!															#DIV/0!	#DIV/0!	#DIV/0!	#DIV/0!	#DIV/0!	#DIV/0!	#DIV/0!	#DIV/0!	#DIV/0!	#DIV/0!	#DIV/0!	#DIV/0!	#DIV/0!	0	0	0	0	0	0	#DIV/0!	#DIV/0!	#DIV/0!	#DIV/0!	#DIV/0!	#DIV/0!	#DIV/0!	0
						#DIV/0!		#DIV/0!															#DIV/0!	#DIV/0!	#DIV/0!	#DIV/0!	#DIV/0!	#DIV/0!	#DIV/0!	#DIV/0!	#DIV/0!	#DIV/0!	#DIV/0!	#DIV/0!	#DIV/0!	0	0	0	0	0	0	#DIV/0!	#DIV/0!	#DIV/0!	#DIV/0!	#DIV/0!	#DIV/0!	#DIV/0!	0
						#DIV/0!		#DIV/0!															#DIV/0!	#DIV/0!	#DIV/0!	#DIV/0!	#DIV/0!	#DIV/0!	#DIV/0!	#DIV/0!	#DIV/0!	#DIV/0!	#DIV/0!	#DIV/0!	#DIV/0!	0	0	0	0	0	0	#DIV/0!	#DIV/0!	#DIV/0!	#DIV/0!	#DIV/0!	#DIV/0!	#DIV/0!	0
						#DIV/0!		#DIV/0!															#DIV/0!	#DIV/0!	#DIV/0!	#DIV/0!	#DIV/0!	#DIV/0!	#DIV/0!	#DIV/0!	#DIV/0!	#DIV/0!	#DIV/0!	#DIV/0!	#DIV/0!	0	0	0	0	0	0	#DIV/0!	#DIV/0!	#DIV/0!	#DIV/0!	#DIV/0!	#DIV/0!	#DIV/0!	0
						#DIV/0!		#DIV/0!															#DIV/0!	#DIV/0!	#DIV/0!	#DIV/0!	#DIV/0!	#DIV/0!	#DIV/0!	#DIV/0!	#DIV/0!	#DIV/0!	#DIV/0!	#DIV/0!	#DIV/0!	0	0	0	0	0	0	#DIV/0!	#DIV/0!	#DIV/0!	#DIV/0!	#DIV/0!	#DIV/0!	#DIV/0!	0
						#DIV/0!		#DIV/0!															#DIV/0!	#DIV/0!	#DIV/0!	#DIV/0!	#DIV/0!	#DIV/0!	#DIV/0!	#DIV/0!	#DIV/0!	#DIV/0!	#DIV/0!	#DIV/0!	#DIV/0!	0	0	0	0	0	0	#DIV/0!	#DIV/0!	#DIV/0!	#DIV/0!	#DIV/0!	#DIV/0!	#DIV/0!	0
						#DIV/0!		#DIV/0!															#DIV/0!	#DIV/0!	#DIV/0!	#DIV/0!	#DIV/0!	#DIV/0!	#DIV/0!	#DIV/0!	#DIV/0!	#DIV/0!	#DIV/0!	#DIV/0!	#DIV/0!	0	0	0	0	0	0	#DIV/0!	#DIV/0!	#DIV/0!	#DIV/0!	#DIV/0!	#DIV/0!	#DIV/0!	0
						#DIV/0!		#DIV/0!															#DIV/0!	#DIV/0!	#DIV/0!	#DIV/0!	#DIV/0!	#DIV/0!	#DIV/0!	#DIV/0!	#DIV/0!	#DIV/0!	#DIV/0!	#DIV/0!	#DIV/0!	0	0	0	0	0	0	#DIV/0!	#DIV/0!	#DIV/0!	#DIV/0!	#DIV/0!	#DIV/0!	#DIV/0!	0
						#DIV/0!		#DIV/0!															#DIV/0!	#DIV/0!	#DIV/0!	#DIV/0!	#DIV/0!	#DIV/0!	#DIV/0!	#DIV/0!	#DIV/0!	#DIV/0!	#DIV/0!	#DIV/0!	#DIV/0!	0	0	0	0	0	0	#DIV/0!	#DIV/0!	#DIV/0!	#DIV/0!	#DIV/0!	#DIV/0!	#DIV/0!	0
						#DIV/0!		#DIV/0!															#DIV/0!	#DIV/0!	#DIV/0!	#DIV/0!	#DIV/0!	#DIV/0!	#DIV/0!	#DIV/0!	#DIV/0!	#DIV/0!	#DIV/0!	#DIV/0!	#DIV/0!	0	0	0	0	0	0	#DIV/0!	#DIV/0!	#DIV/0!	#DIV/0!	#DIV/0!	#DIV/0!	#DIV/0!	0
						#DIV/0!		#DIV/0!															#DIV/0!	#DIV/0!	#DIV/0!	#DIV/0!	#DIV/0!	#DIV/0!	#DIV/0!	#DIV/0!	#DIV/0!	#DIV/0!	#DIV/0!	#DIV/0!	#DIV/0!	0	0	0	0	0	0	#DIV/0!	#DIV/0!	#DIV/0!	#DIV/0!	#DIV/0!	#DIV/0!	#DIV/0!	0
						#DIV/0!		#DIV/0!															#DIV/0!	#DIV/0!	#DIV/0!	#DIV/0!	#DIV/0!	#DIV/0!	#DIV/0!	#DIV/0!	#DIV/0!	#DIV/0!	#DIV/0!	#DIV/0!	#DIV/0!	0	0	0	0	0	0	#DIV/0!	#DIV/0!	#DIV/0!	#DIV/0!	#DIV/0!	#DIV/0!	#DIV/0!	0
						#DIV/0!		#DIV/0!															#DIV/0!	#DIV/0!	#DIV/0!	#DIV/0!	#DIV/0!	#DIV/0!	#DIV/0!	#DIV/0!	#DIV/0!	#DIV/0!	#DIV/0!	#DIV/0!	#DIV/0!	0	0	0	0	0	0	#DIV/0!	#DIV/0!	#DIV/0!	#DIV/0!	#DIV/0!	#DIV/0!	#DIV/0!	0
						#DIV/0!		#DIV/0!															#DIV/0!	#DIV/0!	#DIV/0!	#DIV/0!	#DIV/0!	#DIV/0!	#DIV/0!	#DIV/0!	#DIV/0!	#DIV/0!	#DIV/0!	#DIV/0!	#DIV/0!	0	0	0	0	0	0	#DIV/0!	#DIV/0!	#DIV/0!	#DIV/0!	#DIV/0!	#DIV/0!	#DIV/0!	0
						#DIV/0!		#DIV/0!															#DIV/0!	#DIV/0!	#DIV/0!	#DIV/0!	#DIV/0!	#DIV/0!	#DIV/0!	#DIV/0!	#DIV/0!	#DIV/0!	#DIV/0!	#DIV/0!	#DIV/0!	0	0	0	0	0	0	#DIV/0!	#DIV/0!	#DIV/0!	#DIV/0!	#DIV/0!	#DIV/0!	#DIV/0!	0
						#DIV/0!		#DIV/0!															#DIV/0!	#DIV/0!	#DIV/0!	#DIV/0!	#DIV/0!	#DIV/0!	#DIV/0!	#DIV/0!	#DIV/0!	#DIV/0!	#DIV/0!	#DIV/0!	#DIV/0!	0	0	0	0	0	0	#DIV/0!	#DIV/0!	#DIV/0!	#DIV/0!	#DIV/0!	#DIV/0!	#DIV/0!	0
						#DIV/0!		#DIV/0!															#DIV/0!	#DIV/0!	#DIV/0!	#DIV/0!	#DIV/0!	#DIV/0!	#DIV/0!	#DIV/0!	#DIV/0!	#DIV/0!	#DIV/0!	#DIV/0!	#DIV/0!	0	0	0	0	0	0	#DIV/0!	#DIV/0!	#DIV/0!	#DIV/0!	#DIV/0!	#DIV/0!	#DIV/0!	0
						#DIV/0!		#DIV/0!															#DIV/0!	#DIV/0!	#DIV/0!	#DIV/0!	#DIV/0!	#DIV/0!	#DIV/0!	#DIV/0!	#DIV/0!	#DIV/0!	#DIV/0!	#DIV/0!	#DIV/0!	0	0	0	0	0	0	#DIV/0!	#DIV/0!	#DIV/0!	#DIV/0!	#DIV/0!	#DIV/0!	#DIV/0!	0
						#DIV/0!		#DIV/0!															#DIV/0!	#DIV/0!	#DIV/0!	#DIV/0!	#DIV/0!	#DIV/0!	#DIV/0!	#DIV/0!	#DIV/0!	#DIV/0!	#DIV/0!	#DIV/0!	#DIV/0!	0	0	0	0	0	0	#DIV/0!	#DIV/0!	#DIV/0!	#DIV/0!	#DIV/0!	#DIV/0!	#DIV/0!	0
						#DIV/0!		#DIV/0!															#DIV/0!	#DIV/0!	#DIV/0!	#DIV/0!	#DIV/0!	#DIV/0!	#DIV/0!	#DIV/0!	#DIV/0!	#DIV/0!	#DIV/0!	#DIV/0!	#DIV/0!	0	0	0	0	0	0	#DIV/0!	#DIV/0!	#DIV/0!	#DIV/0!	#DIV/0!	#DIV/0!	#DIV/0!	0
						#DIV/0!		#DIV/0!															#DIV/0!	#DIV/0!	#DIV/0!	#DIV/0!	#DIV/0!	#DIV/0!	#DIV/0!	#DIV/0!	#DIV/0!	#DIV/0!	#DIV/0!	#DIV/0!	#DIV/0!	0	0	0	0	0	0	#DIV/0!	#DIV/0!	#DIV/0!	#DIV/0!	#DIV/0!	#DIV/0!	#DIV/0!	0
						#DIV/0!		#DIV/0!															#DIV/0!	#DIV/0!	#DIV/0!	#DIV/0!	#DIV/0!	#DIV/0!	#DIV/0!	#DIV/0!	#DIV/0!	#DIV/0!	#DIV/0!	#DIV/0!	#DIV/0!	0	0	0	0	0	0	#DIV/0!	#DIV/0!	#DIV/0!	#DIV/0!	#DIV/0!	#DIV/0!	#DIV/0!	0
						#DIV/0!		#DIV/0!															#DIV/0!	#DIV/0!	#DIV/0!	#DIV/0!	#DIV/0!	#DIV/0!	#DIV/0!	#DIV/0!	#DIV/0!	#DIV/0!	#DIV/0!	#DIV/0!	#DIV/0!	0	0	0	0	0	0	#DIV/0!	#DIV/0!	#DIV/0!	#DIV/0!	#DIV/0!	#DIV/0!	#DIV/0!	0
						#DIV/0!		#DIV/0!															#DIV/0!	#DIV/0!	#DIV/0!	#DIV/0!	#DIV/0!	#DIV/0!	#DIV/0!	#DIV/0!	#DIV/0!	#DIV/0!	#DIV/0!	#DIV/0!	#DIV/0!	0	0	0	0	0	0	#DIV/0!	#DIV/0!	#DIV/0!	#DIV/0!	#DIV/0!	#DIV/0!	#DIV/0!	0
						#DIV/0!		#DIV/0!															#DIV/0!	#DIV/0!	#DIV/0!	#DIV/0!	#DIV/0!	#DIV/0!	#DIV/0!	#DIV/0!	#DIV/0!	#DIV/0!	#DIV/0!	#DIV/0!	#DIV/0!	0	0	0	0	0	0	#DIV/0!	#DIV/0!	#DIV/0!	#DIV/0!	#DIV/0!	#DIV/0!	#DIV/0!	0
						#DIV/0!		#DIV/0!															#DIV/0!	#DIV/0!	#DIV/0!	#DIV/0!	#DIV/0!	#DIV/0!	#DIV/0!	#DIV/0!	#DIV/0!	#DIV/0!	#DIV/0!	#DIV/0!	#DIV/0!	0	0	0	0	0	0	#DIV/0!	#DIV/0!	#DIV/0!	#DIV/0!	#DIV/0!	#DIV/0!	#DIV/0!	0
						#DIV/0!		#DIV/0!															#DIV/0!	#DIV/0!	#DIV/0!	#DIV/0!	#DIV/0!	#DIV/0!	#DIV/0!	#DIV/0!	#DIV/0!	#DIV/0!	#DIV/0!	#DIV/0!	#DIV/0!	0	0	0	0	0	0	#DIV/0!	#DIV/0!	#DIV/0!	#DIV/0!	#DIV/0!	#DIV/0!	#DIV/0!	0
						#DIV/0!		#DIV/0!															#DIV/0!	#DIV/0!	#DIV/0!	#DIV/0!	#DIV/0!	#DIV/0!	#DIV/0!	#DIV/0!	#DIV/0!	#DIV/0!	#DIV/0!	#DIV/0!	#DIV/0!	0	0	0	0	0	0	#DIV/0!	#DIV/0!	#DIV/0!	#DIV/0!	#DIV/0!	#DIV/0!	#DIV/0!	0
						#DIV/0!		#DIV/0!															#DIV/0!	#DIV/0!	#DIV/0!	#DIV/0!	#DIV/0!	#DIV/0!	#DIV/0!	#DIV/0!	#DIV/0!	#DIV/0!	#DIV/0!	#DIV/0!	#DIV/0!	0	0	0	0	0	0	#DIV/0!	#DIV/0!	#DIV/0!	#DIV/0!	#DIV/0!	#DIV/0!	#DIV/0!	0
						#DIV/0!		#DIV/0!															#DIV/0!	#DIV/0!	#DIV/0!	#DIV/0!	#DIV/0!	#DIV/0!	#DIV/0!	#DIV/0!	#DIV/0!	#DIV/0!	#DIV/0!	#DIV/0!	#DIV/0!	0	0	0	0	0	0	#DIV/0!	#DIV/0!	#DIV/0!	#DIV/0!	#DIV/0!	#DIV/0!	#DIV/0!	0
						#DIV/0!		#DIV/0!															#DIV/0!	#DIV/0!	#DIV/0!	#DIV/0!	#DIV/0!	#DIV/0!	#DIV/0!	#DIV/0!	#DIV/0!	#DIV/0!	#DIV/0!	#DIV/0!	#DIV/0!	0	0	0	0	0	0	#DIV/0!	#DIV/0!	#DIV/0!	#DIV/0!	#DIV/0!	#DIV/0!	#DIV/0!	0
						#DIV/0!		#DIV/0!															#DIV/0!	#DIV/0!	#DIV/0!	#DIV/0!	#DIV/0!	#DIV/0!	#DIV/0!	#DIV/0!	#DIV/0!	#DIV/0!	#DIV/0!	#DIV/0!	#DIV/0!	0	0	0	0	0	0	#DIV/0!	#DIV/0!	#DIV/0!	#DIV/0!	#DIV/0!	#DIV/0!	#DIV/0!	0
						#DIV/0!		#DIV/0!															#DIV/0!	#DIV/0!	#DIV/0!	#DIV/0!	#DIV/0!	#DIV/0!	#DIV/0!	#DIV/0!	#DIV/0!	#DIV/0!	#DIV/0!	#DIV/0!	#DIV/0!	0	0	0	0	0	0	#DIV/0!	#DIV/0!	#DIV/0!	#DIV/0!	#DIV/0!	#DIV/0!	#DIV/0!	0
						#DIV/0!		#DIV/0!															#DIV/0!	#DIV/0!	#DIV/0!	#DIV/0!	#DIV/0!	#DIV/0!	#DIV/0!	#DIV/0!	#DIV/0!	#DIV/0!	#DIV/0!	#DIV/0!	#DIV/0!	0	0	0	0	0	0	#DIV/0!	#DIV/0!	#DIV/0!	#DIV/0!	#DIV/0!	#DIV/0!	#DIV/0!	0
						#DIV/0!		#DIV/0!															#DIV/0!	#DIV/0!	#DIV/0!	#DIV/0!	#DIV/0!	#DIV/0!	#DIV/0!	#DIV/0!	#DIV/0!	#DIV/0!	#DIV/0!	#DIV/0!	#DIV/0!	0	0	0	0	0	0	#DIV/0!	#DIV/0!	#DIV/0!	#DIV/0!	#DIV/0!	#DIV/0!	#DIV/0!	0
						#DIV/0!		#DIV/0!															#DIV/0!	#DIV/0!	#DIV/0!	#DIV/0!	#DIV/0!	#DIV/0!	#DIV/0!	#DIV/0!	#DIV/0!	#DIV/0!	#DIV/0!	#DIV/0!	#DIV/0!	0	0	0	0	0	0	#DIV/0!	#DIV/0!	#DIV/0!	#DIV/0!	#DIV/0!	#DIV/0!	#DIV/0!	0
						#DIV/0!		#DIV/0!															#DIV/0!	#DIV/0!	#DIV/0!	#DIV/0!	#DIV/0!	#DIV/0!	#DIV/0!	#DIV/0!	#DIV/0!	#DIV/0!	#DIV/0!	#DIV/0!	#DIV/0!	0	0	0	0	0	0	#DIV/0!	#DIV/0!	#DIV/0!	#DIV/0!	#DIV/0!	#DIV/0!	#DIV/0!	0
						#DIV/0!		#DIV/0!															#DIV/0!	#DIV/0!	#DIV/0!	#DIV/0!	#DIV/0!	#DIV/0!	#DIV/0!	#DIV/0!	#DIV/0!	#DIV/0!	#DIV/0!	#DIV/0!	#DIV/0!	0	0	0	0	0	0	#DIV/0!	#DIV/0!	#DIV/0!	#DIV/0!	#DIV/0!	#DIV/0!	#DIV/0!	0
						#DIV/0!		#DIV/0!															#DIV/0!	#DIV/0!	#DIV/0!	#DIV/0!	#DIV/0!	#DIV/0!	#DIV/0!	#DIV/0!	#DIV/0!	#DIV/0!	#DIV/0!	#DIV/0!	#DIV/0!	0	0	0	0	0	0	#DIV/0!	#DIV/0!	#DIV/0!	#DIV/0!	#DIV/0!	#DIV/0!	#DIV/0!	0
						#DIV/0!		#DIV/0!															#DIV/0!	#DIV/0!	#DIV/0!	#DIV/0!	#DIV/0!	#DIV/0!	#DIV/0!	#DIV/0!	#DIV/0!	#DIV/0!	#DIV/0!	#DIV/0!	#DIV/0!	0	0	0	0	0	0	#DIV/0!	#DIV/0!	#DIV/0!	#DIV/0!	#DIV/0!	#DIV/0!	#DIV/0!	0
						#DIV/0!		#DIV/0!															#DIV/0!	#DIV/0!	#DIV/0!	#DIV/0!	#DIV/0!	#DIV/0!	#DIV/0!	#DIV/0!	#DIV/0!	#DIV/0!	#DIV/0!	#DIV/0!	#DIV/0!	0	0	0	0	0	0	#DIV/0!	#DIV/0!	#DIV/0!	#DIV/0!	#DIV/0!	#DIV/0!	#DIV/0!	0
						#DIV/0!		#DIV/0!															#DIV/0!	#DIV/0!	#DIV/0!	#DIV/0!	#DIV/0!	#DIV/0!	#DIV/0!	#DIV/0!	#DIV/0!	#DIV/0!	#DIV/0!	#DIV/0!	#DIV/0!	0	0	0	0	0	0	#DIV/0!	#DIV/0!	#DIV/0!	#DIV/0!	#DIV/0!	#DIV/0!	#DIV/0!	0
						#DIV/0!		#DIV/0!															#DIV/0!	#DIV/0!	#DIV/0!	#DIV/0!	#DIV/0!	#DIV/0!	#DIV/0!	#DIV/0!	#DIV/0!	#DIV/0!	#DIV/0!	#DIV/0!	#DIV/0!	0	0	0	0	0	0	#DIV/0!	#DIV/0!	#DIV/0!	#DIV/0!	#DIV/0!	#DIV/0!	#DIV/0!	0
						#DIV/0!		#DIV/0!															#DIV/0!	#DIV/0!	#DIV/0!	#DIV/0!	#DIV/0!	#DIV/0!	#DIV/0!	#DIV/0!	#DIV/0!	#DIV/0!	#DIV/0!	#DIV/0!	#DIV/0!	0	0	0	0	0	0	#DIV/0!	#DIV/0!	#DIV/0!	#DIV/0!	#DIV/0!	#DIV/0!	#DIV/0!	0
						#DIV/0!		#DIV/0!															#DIV/0!	#DIV/0!	#DIV/0!	#DIV/0!	#DIV/0!	#DIV/0!	#DIV/0!	#DIV/0!	#DIV/0!	#DIV/0!	#DIV/0!	#DIV/0!	#DIV/0!	0	0	0	0	0	0	#DIV/0!	#DIV/0!	#DIV/0!	#DIV/0!	#DIV/0!	#DIV/0!	#DIV/0!	0
						#DIV/0!		#DIV/0!															#DIV/0!	#DIV/0!	#DIV/0!	#DIV/0!	#DIV/0!	#DIV/0!	#DIV/0!	#DIV/0!	#DIV/0!	#DIV/0!	#DIV/0!	#DIV/0!	#DIV/0!	0	0	0	0	0	0	#DIV/0!	#DIV/0!	#DIV/0!	#DIV/0!	#DIV/0!	#DIV/0!	#DIV/0!	0
						#DIV/0!		#DIV/0!															#DIV/0!	#DIV/0!	#DIV/0!	#DIV/0!	#DIV/0!	#DIV/0!	#DIV/0!	#DIV/0!	#DIV/0!	#DIV/0!	#DIV/0!	#DIV/0!	#DIV/0!	0	0	0	0	0	0	#DIV/0!	#DIV/0!	#DIV/0!	#DIV/0!	#DIV/0!	#DIV/0!	#DIV/0!	0
						#DIV/0!		#DIV/0!															#DIV/0!	#DIV/0!	#DIV/0!	#DIV/0!	#DIV/0!	#DIV/0!	#DIV/0!	#DIV/0!	#DIV/0!	#DIV/0!	#DIV/0!	#DIV/0!	#DIV/0!	0	0	0	0	0	0	#DIV/0!	#DIV/0!	#DIV/0!	#DIV/0!	#DIV/0!	#DIV/0!	#DIV/0!	0
						#DIV/0!		#DIV/0!															#DIV/0!	#DIV/0!	#DIV/0!	#DIV/0!	#DIV/0!	#DIV/0!	#DIV/0!	#DIV/0!	#DIV/0!	#DIV/0!	#DIV/0!	#DIV/0!	#DIV/0!	0	0	0	0	0	0	#DIV/0!	#DIV/0!	#DIV/0!	#DIV/0!	#DIV/0!	#DIV/0!	#DIV/0!	0
						#DIV/0!		#DIV/0!															#DIV/0!	#DIV/0!	#DIV/0!	#DIV/0!	#DIV/0!	#DIV/0!	#DIV/0!	#DIV/0!	#DIV/0!	#DIV/0!	#DIV/0!	#DIV/0!	#DIV/0!	0	0	0	0	0	0	#DIV/0!	#DIV/0!	#DIV/0!	#DIV/0!	#DIV/0!	#DIV/0!	#DIV/0!	0
						#DIV/0!		#DIV/0!															#DIV/0!	#DIV/0!	#DIV/0!	#DIV/0!	#DIV/0!	#DIV/0!	#DIV/0!	#DIV/0!	#DIV/0!	#DIV/0!	#DIV/0!	#DIV/0!	#DIV/0!	0	0	0	0	0	0	#DIV/0!	#DIV/0!	#DIV/0!	#DIV/0!	#DIV/0!	#DIV/0!	#DIV/0!	0
						#DIV/0!		#DIV/0!															#DIV/0!	#DIV/0!	#DIV/0!	#DIV/0!	#DIV/0!	#DIV/0!	#DIV/0!	#DIV/0!	#DIV/0!	#DIV/0!	#DIV/0!	#DIV/0!	#DIV/0!	0	0	0	0	0	0	#DIV/0!	#DIV/0!	#DIV/0!	#DIV/0!	#DIV/0!	#DIV/0!	#DIV/0!	0
						#DIV/0!		#DIV/0!															#DIV/0!	#DIV/0!	#DIV/0!	#DIV/0!	#DIV/0!	#DIV/0!	#DIV/0!	#DIV/0!	#DIV/0!	#DIV/0!	#DIV/0!	#DIV/0!	#DIV/0!	0	0	0	0	0	0	#DIV/0!	#DIV/0!	#DIV/0!	#DIV/0!	#DIV/0!	#DIV/0!	#DIV/0!	0
						#DIV/0!		#DIV/0!															#DIV/0!	#DIV/0!	#DIV/0!	#DIV/0!	#DIV/0!	#DIV/0!	#DIV/0!	#DIV/0!	#DIV/0!	#DIV/0!	#DIV/0!	#DIV/0!	#DIV/0!	0	0	0	0	0	0	#DIV/0!	#DIV/0!	#DIV/0!	#DIV/0!	#DIV/0!	#DIV/0!	#DIV/0!	0
						#DIV/0!		#DIV/0!															#DIV/0!	#DIV/0!	#DIV/0!	#DIV/0!	#DIV/0!	#DIV/0!	#DIV/0!	#DIV/0!	#DIV/0!	#DIV/0!	#DIV/0!	#DIV/0!	#DIV/0!	0	0	0	0	0	0	#DIV/0!	#DIV/0!	#DIV/0!	#DIV/0!	#DIV/0!	#DIV/0!	#DIV/0!	0
						#DIV/0!		#DIV/0!															#DIV/0!	#DIV/0!	#DIV/0!	#DIV/0!	#DIV/0!	#DIV/0!	#DIV/0!	#DIV/0!	#DIV/0!	#DIV/0!	#DIV/0!	#DIV/0!	#DIV/0!	0	0	0	0	0	0	#DIV/0!	#DIV/0!	#DIV/0!	#DIV/0!	#DIV/0!	#DIV/0!	#DIV/0!	0
						#DIV/0!		#DIV/0!															#DIV/0!	#DIV/0!	#DIV/0!	#DIV/0!	#DIV/0!	#DIV/0!	#DIV/0!	#DIV/0!	#DIV/0!	#DIV/0!	#DIV/0!	#DIV/0!	#DIV/0!	0	0	0	0	0	0	#DIV/0!	#DIV/0!	#DIV/0!	#DIV/0!	#DIV/0!	#DIV/0!	#DIV/0!	0
						#DIV/0!		#DIV/0!															#DIV/0!	#DIV/0!	#DIV/0!	#DIV/0!	#DIV/0!	#DIV/0!	#DIV/0!	#DIV/0!	#DIV/0!	#DIV/0!	#DIV/0!	#DIV/0!	#DIV/0!	0	0	0	0	0	0	#DIV/0!	#DIV/0!	#DIV/0!	#DIV/0!	#DIV/0!	#DIV/0!	#DIV/0!	0
						#DIV/0!		#DIV/0!															#DIV/0!	#DIV/0!	#DIV/0!	#DIV/0!	#DIV/0!	#DIV/0!	#DIV/0!	#DIV/0!	#DIV/0!	#DIV/0!	#DIV/0!	#DIV/0!	#DIV/0!	0	0	0	0	0	0	#DIV/0!	#DIV/0!	#DIV/0!	#DIV/0!	#DIV/0!	#DIV/0!	#DIV/0!	0
						#DIV/0!		#DIV/0!															#DIV/0!	#DIV/0!	#DIV/0!	#DIV/0!	#DIV/0!	#DIV/0!	#DIV/0!	#DIV/0!	#DIV/0!	#DIV/0!	#DIV/0!	#DIV/0!	#DIV/0!	0	0	0	0	0	0	#DIV/0!	#DIV/0!	#DIV/0!	#DIV/0!	#DIV/0!	#DIV/0!	#DIV/0!	0
						#DIV/0!		#DIV/0!															#DIV/0!	#DIV/0!	#DIV/0!	#DIV/0!	#DIV/0!	#DIV/0!	#DIV/0!	#DIV/0!	#DIV/0!	#DIV/0!	#DIV/0!	#DIV/0!	#DIV/0!	0	0	0	0	0	0	#DIV/0!	#DIV/0!	#DIV/0!	#DIV/0!	#DIV/0!	#DIV/0!	#DIV/0!	0
						#DIV/0!		#DIV/0!															#DIV/0!	#DIV/0!	#DIV/0!	#DIV/0!	#DIV/0!	#DIV/0!	#DIV/0!	#DIV/0!	#DIV/0!	#DIV/0!	#DIV/0!	#DIV/0!	#DIV/0!	0	0	0	0	0	0	#DIV/0!	#DIV/0!	#DIV/0!	#DIV/0!	#DIV/0!	#DIV/0!	#DIV/0!	0
						#DIV/0!		#DIV/0!															#DIV/0!	#DIV/0!	#DIV/0!	#DIV/0!	#DIV/0!	#DIV/0!	#DIV/0!	#DIV/0!	#DIV/0!	#DIV/0!	#DIV/0!	#DIV/0!	#DIV/0!	0	0	0	0	0	0	#DIV/0!	#DIV/0!	#DIV/0!	#DIV/0!	#DIV/0!	#DIV/0!	#DIV/0!	0
						#DIV/0!		#DIV/0!															#DIV/0!	#DIV/0!	#DIV/0!	#DIV/0!	#DIV/0!	#DIV/0!	#DIV/0!	#DIV/0!	#DIV/0!	#DIV/0!	#DIV/0!	#DIV/0!	#DIV/0!	0	0	0	0	0	0	#DIV/0!	#DIV/0!	#DIV/0!	#DIV/0!	#DIV/0!	#DIV/0!	#DIV/0!	0
						#DIV/0!		#DIV/0!															#DIV/0!	#DIV/0!	#DIV/0!	#DIV/0!	#DIV/0!	#DIV/0!	#DIV/0!	#DIV/0!	#DIV/0!	#DIV/0!	#DIV/0!	#DIV/0!	#DIV/0!	0	0	0	0	0	0	#DIV/0!	#DIV/0!	#DIV/0!	#DIV/0!	#DIV/0!	#DIV/0!	#DIV/0!	0
						#DIV/0!		#DIV/0!															#DIV/0!	#DIV/0!	#DIV/0!	#DIV/0!	#DIV/0!	#DIV/0!	#DIV/0!	#DIV/0!	#DIV/0!	#DIV/0!	#DIV/0!	#DIV/0!	#DIV/0!	0	0	0	0	0	0	#DIV/0!	#DIV/0!	#DIV/0!	#DIV/0!	#DIV/0!	#DIV/0!	#DIV/0!	0
						#DIV/0!		#DIV/0!															#DIV/0!	#DIV/0!	#DIV/0!	#DIV/0!	#DIV/0!	#DIV/0!	#DIV/0!	#DIV/0!	#DIV/0!	#DIV/0!	#DIV/0!	#DIV/0!	#DIV/0!	0	0	0	0	0	0	#DIV/0!	#DIV/0!	#DIV/0!	#DIV/0!	#DIV/0!	#DIV/0!	#DIV/0!	0
						#DIV/0!		#DIV/0!															#DIV/0!	#DIV/0!	#DIV/0!	#DIV/0!	#DIV/0!	#DIV/0!	#DIV/0!	#DIV/0!	#DIV/0!	#DIV/0!	#DIV/0!	#DIV/0!	#DIV/0!	0	0	0	0	0	0	#DIV/0!	#DIV/0!	#DIV/0!	#DIV/0!	#DIV/0!	#DIV/0!	#DIV/0!	0
						#DIV/0!		#DIV/0!															#DIV/0!	#DIV/0!	#DIV/0!	#DIV/0!	#DIV/0!	#DIV/0!	#DIV/0!	#DIV/0!	#DIV/0!	#DIV/0!	#DIV/0!	#DIV/0!	#DIV/0!	0	0	0	0	0	0	#DIV/0!	#DIV/0!	#DIV/0!	#DIV/0!	#DIV/0!	#DIV/0!	#DIV/0!	0
						#DIV/0!		#DIV/0!															#DIV/0!	#DIV/0!	#DIV/0!	#DIV/0!	#DIV/0!	#DIV/0!	#DIV/0!	#DIV/0!	#DIV/0!	#DIV/0!	#DIV/0!	#DIV/0!	#DIV/0!	0	0	0	0	0	0	#DIV/0!	#DIV/0!	#DIV/0!	#DIV/0!	#DIV/0!	#DIV/0!	#DIV/0!	0
						#DIV/0!		#DIV/0!															#DIV/0!	#DIV/0!	#DIV/0!	#DIV/0!	#DIV/0!	#DIV/0!	#DIV/0!	#DIV/0!	#DIV/0!	#DIV/0!	#DIV/0!	#DIV/0!	#DIV/0!	0	0	0	0	0	0	#DIV/0!	#DIV/0!	#DIV/0!	#DIV/0!	#DIV/0!	#DIV/0!	#DIV/0!	0
						#DIV/0!		#DIV/0!															#DIV/0!	#DIV/0!	#DIV/0!	#DIV/0!	#DIV/0!	#DIV/0!	#DIV/0!	#DIV/0!	#DIV/0!	#DIV/0!	#DIV/0!	#DIV/0!	#DIV/0!	0	0	0	0	0	0	#DIV/0!	#DIV/0!	#DIV/0!	#DIV/0!	#DIV/0!	#DIV/0!	#DIV/0!	0
						#DIV/0!		#DIV/0!															#DIV/0!	#DIV/0!	#DIV/0!	#DIV/0!	#DIV/0!	#DIV/0!	#DIV/0!	#DIV/0!	#DIV/0!	#DIV/0!	#DIV/0!	#DIV/0!	#DIV/0!	0	0	0	0	0	0	#DIV/0!	#DIV/0!	#DIV/0!	#DIV/0!	#DIV/0!	#DIV/0!	#DIV/0!	0
						#DIV/0!		#DIV/0!															#DIV/0!	#DIV/0!	#DIV/0!	#DIV/0!	#DIV/0!	#DIV/0!	#DIV/0!	#DIV/0!	#DIV/0!	#DIV/0!	#DIV/0!	#DIV/0!	#DIV/0!	0	0	0	0	0	0	#DIV/0!	#DIV/0!	#DIV/0!	#DIV/0!	#DIV/0!	#DIV/0!	#DIV/0!	0
						#DIV/0!		#DIV/0!															#DIV/0!	#DIV/0!	#DIV/0!	#DIV/0!	#DIV/0!	#DIV/0!	#DIV/0!	#DIV/0!	#DIV/0!	#DIV/0!	#DIV/0!	#DIV/0!	#DIV/0!	0	0	0	0	0	0	#DIV/0!	#DIV/0!	#DIV/0!	#DIV/0!	#DIV/0!	#DIV/0!	#DIV/0!	0
						#DIV/0!		#DIV/0!															#DIV/0!	#DIV/0!	#DIV/0!	#DIV/0!	#DIV/0!	#DIV/0!	#DIV/0!	#DIV/0!	#DIV/0!	#DIV/0!	#DIV/0!	#DIV/0!	#DIV/0!	0	0	0	0	0	0	#DIV/0!	#DIV/0!	#DIV/0!	#DIV/0!	#DIV/0!	#DIV/0!	#DIV/0!	0
						#DIV/0!		#DIV/0!															#DIV/0!	#DIV/0!	#DIV/0!	#DIV/0!	#DIV/0!	#DIV/0!	#DIV/0!	#DIV/0!	#DIV/0!	#DIV/0!	#DIV/0!	#DIV/0!	#DIV/0!	0	0	0	0	0	0	#DIV/0!	#DIV/0!	#DIV/0!	#DIV/0!	#DIV/0!	#DIV/0!	#DIV/0!	0
						#DIV/0!		#DIV/0!															#DIV/0!	#DIV/0!	#DIV/0!	#DIV/0!	#DIV/0!	#DIV/0!	#DIV/0!	#DIV/0!	#DIV/0!	#DIV/0!	#DIV/0!	#DIV/0!	#DIV/0!	0	0	0	0	0	0	#DIV/0!	#DIV/0!	#DIV/0!	#DIV/0!	#DIV/0!	#DIV/0!	#DIV/0!	0
						#DIV/0!		#DIV/0!															#DIV/0!	#DIV/0!	#DIV/0!	#DIV/0!	#DIV/0!	#DIV/0!	#DIV/0!	#DIV/0!	#DIV/0!	#DIV/0!	#DIV/0!	#DIV/0!	#DIV/0!	0	0	0	0	0	0	#DIV/0!	#DIV/0!	#DIV/0!	#DIV/0!	#DIV/0!	#DIV/0!	#DIV/0!	0
						#DIV/0!		#DIV/0!															#DIV/0!	#DIV/0!	#DIV/0!	#DIV/0!	#DIV/0!	#DIV/0!	#DIV/0!	#DIV/0!	#DIV/0!	#DIV/0!	#DIV/0!	#DIV/0!	#DIV/0!	0	0	0	0	0	0	#DIV/0!	#DIV/0!	#DIV/0!	#DIV/0!	#DIV/0!	#DIV/0!	#DIV/0!	0
						#DIV/0!		#DIV/0!															#DIV/0!	#DIV/0!	#DIV/0!	#DIV/0!	#DIV/0!	#DIV/0!	#DIV/0!	#DIV/0!	#DIV/0!	#DIV/0!	#DIV/0!	#DIV/0!	#DIV/0!	0	0	0	0	0	0	#DIV/0!	#DIV/0!	#DIV/0!	#DIV/0!	#DIV/0!	#DIV/0!	#DIV/0!	0
						#DIV/0!		#DIV/0!															#DIV/0!	#DIV/0!	#DIV/0!	#DIV/0!	#DIV/0!	#DIV/0!	#DIV/0!	#DIV/0!	#DIV/0!	#DIV/0!	#DIV/0!	#DIV/0!	#DIV/0!	0	0	0	0	0	0	#DIV/0!	#DIV/0!	#DIV/0!	#DIV/0!	#DIV/0!	#DIV/0!	#DIV/0!	0
						#DIV/0!		#DIV/0!															#DIV/0!	#DIV/0!	#DIV/0!	#DIV/0!	#DIV/0!	#DIV/0!	#DIV/0!	#DIV/0!	#DIV/0!	#DIV/0!	#DIV/0!	#DIV/0!	#DIV/0!	0	0	0	0	0	0	#DIV/0!	#DIV/0!	#DIV/0!	#DIV/0!	#DIV/0!	#DIV/0!	#DIV/0!	0
						#DIV/0!		#DIV/0!															#DIV/0!	#DIV/0!	#DIV/0!	#DIV/0!	#DIV/0!	#DIV/0!	#DIV/0!	#DIV/0!	#DIV/0!	#DIV/0!	#DIV/0!	#DIV/0!	#DIV/0!	0	0	0	0	0	0	#DIV/0!	#DIV/0!	#DIV/0!	#DIV/0!	#DIV/0!	#DIV/0!	#DIV/0!	0
						#DIV/0!		#DIV/0!															#DIV/0!	#DIV/0!	#DIV/0!	#DIV/0!	#DIV/0!	#DIV/0!	#DIV/0!	#DIV/0!	#DIV/0!	#DIV/0!	#DIV/0!	#DIV/0!	#DIV/0!	0	0	0	0	0	0	#DIV/0!	#DIV/0!	#DIV/0!	#DIV/0!	#DIV/0!	#DIV/0!	#DIV/0!	0
						#DIV/0!		#DIV/0!															#DIV/0!	#DIV/0!	#DIV/0!	#DIV/0!	#DIV/0!	#DIV/0!	#DIV/0!	#DIV/0!	#DIV/0!	#DIV/0!	#DIV/0!	#DIV/0!	#DIV/0!	0	0	0	0	0	0	#DIV/0!	#DIV/0!	#DIV/0!	#DIV/0!	#DIV/0!	#DIV/0!	#DIV/0!	0
						#DIV/0!		#DIV/0!															#DIV/0!	#DIV/0!	#DIV/0!	#DIV/0!	#DIV/0!	#DIV/0!	#DIV/0!	#DIV/0!	#DIV/0!	#DIV/0!	#DIV/0!	#DIV/0!	#DIV/0!	0	0	0	0	0	0	#DIV/0!	#DIV/0!	#DIV/0!	#DIV/0!	#DIV/0!	#DIV/0!	#DIV/0!	0
						#DIV/0!		#DIV/0!															#DIV/0!	#DIV/0!	#DIV/0!	#DIV/0!	#DIV/0!	#DIV/0!	#DIV/0!	#DIV/0!	#DIV/0!	#DIV/0!	#DIV/0!	#DIV/0!	#DIV/0!	0	0	0	0	0	0	#DIV/0!	#DIV/0!	#DIV/0!	#DIV/0!	#DIV/0!	#DIV/0!	#DIV/0!	0
						#DIV/0!		#DIV/0!															#DIV/0!	#DIV/0!	#DIV/0!	#DIV/0!	#DIV/0!	#DIV/0!	#DIV/0!	#DIV/0!	#DIV/0!	#DIV/0!	#DIV/0!	#DIV/0!	#DIV/0!	0	0	0	0	0	0	#DIV/0!	#DIV/0!	#DIV/0!	#DIV/0!	#DIV/0!	#DIV/0!	#DIV/0!	0
						#DIV/0!		#DIV/0!															#DIV/0!	#DIV/0!	#DIV/0!	#DIV/0!	#DIV/0!	#DIV/0!	#DIV/0!	#DIV/0!	#DIV/0!	#DIV/0!	#DIV/0!	#DIV/0!	#DIV/0!	0	0	0	0	0	0	#DIV/0!	#DIV/0!	#DIV/0!	#DIV/0!	#DIV/0!	#DIV/0!	#DIV/0!	0
						#DIV/0!		#DIV/0!															#DIV/0!	#DIV/0!	#DIV/0!	#DIV/0!	#DIV/0!	#DIV/0!	#DIV/0!	#DIV/0!	#DIV/0!	#DIV/0!	#DIV/0!	#DIV/0!	#DIV/0!	0	0	0	0	0	0	#DIV/0!	#DIV/0!	#DIV/0!	#DIV/0!	#DIV/0!	#DIV/0!	#DIV/0!	0
						#DIV/0!		#DIV/0!															#DIV/0!	#DIV/0!	#DIV/0!	#DIV/0!	#DIV/0!	#DIV/0!	#DIV/0!	#DIV/0!	#DIV/0!	#DIV/0!	#DIV/0!	#DIV/0!	#DIV/0!	0	0	0	0	0	0	#DIV/0!	#DIV/0!	#DIV/0!	#DIV/0!	#DIV/0!	#DIV/0!	#DIV/0!	0
						#DIV/0!		#DIV/0!															#DIV/0!	#DIV/0!	#DIV/0!	#DIV/0!	#DIV/0!	#DIV/0!	#DIV/0!	#DIV/0!	#DIV/0!	#DIV/0!	#DIV/0!	#DIV/0!	#DIV/0!	0	0	0	0	0	0	#DIV/0!	#DIV/0!	#DIV/0!	#DIV/0!	#DIV/0!	#DIV/0!	#DIV/0!	0
						#DIV/0!		#DIV/0!															#DIV/0!	#DIV/0!	#DIV/0!	#DIV/0!	#DIV/0!	#DIV/0!	#DIV/0!	#DIV/0!	#DIV/0!	#DIV/0!	#DIV/0!	#DIV/0!	#DIV/0!	0	0	0	0	0	0	#DIV/0!	#DIV/0!	#DIV/0!	#DIV/0!	#DIV/0!	#DIV/0!	#DIV/0!	0
						#DIV/0!		#DIV/0!															#DIV/0!	#DIV/0!	#DIV/0!	#DIV/0!	#DIV/0!	#DIV/0!	#DIV/0!	#DIV/0!	#DIV/0!	#DIV/0!	#DIV/0!	#DIV/0!	#DIV/0!	0	0	0	0	0	0	#DIV/0!	#DIV/0!	#DIV/0!	#DIV/0!	#DIV/0!	#DIV/0!	#DIV/0!	0
						#DIV/0!		#DIV/0!															#DIV/0!	#DIV/0!	#DIV/0!	#DIV/0!	#DIV/0!	#DIV/0!	#DIV/0!	#DIV/0!	#DIV/0!	#DIV/0!	#DIV/0!	#DIV/0!	#DIV/0!	0	0	0	0	0	0	#DIV/0!	#DIV/0!	#DIV/0!	#DIV/0!	#DIV/0!	#DIV/0!	#DIV/0!	0
						#DIV/0!		#DIV/0!															#DIV/0!	#DIV/0!	#DIV/0!	#DIV/0!	#DIV/0!	#DIV/0!	#DIV/0!	#DIV/0!	#DIV/0!	#DIV/0!	#DIV/0!	#DIV/0!	#DIV/0!	0	0	0	0	0	0	#DIV/0!	#DIV/0!	#DIV/0!	#DIV/0!	#DIV/0!	#DIV/0!	#DIV/0!	0
						#DIV/0!		#DIV/0!															#DIV/0!	#DIV/0!	#DIV/0!	#DIV/0!	#DIV/0!	#DIV/0!	#DIV/0!	#DIV/0!	#DIV/0!	#DIV/0!	#DIV/0!	#DIV/0!	#DIV/0!	0	0	0	0	0	0	#DIV/0!	#DIV/0!	#DIV/0!	#DIV/0!	#DIV/0!	#DIV/0!	#DIV/0!	0
						#DIV/0!		#DIV/0!															#DIV/0!	#DIV/0!	#DIV/0!	#DIV/0!	#DIV/0!	#DIV/0!	#DIV/0!	#DIV/0!	#DIV/0!	#DIV/0!	#DIV/0!	#DIV/0!	#DIV/0!	0	0	0	0	0	0	#DIV/0!	#DIV/0!	#DIV/0!	#DIV/0!	#DIV/0!	#DIV/0!	#DIV/0!	0
						#DIV/0!		#DIV/0!															#DIV/0!	#DIV/0!	#DIV/0!	#DIV/0!	#DIV/0!	#DIV/0!	#DIV/0!	#DIV/0!	#DIV/0!	#DIV/0!	#DIV/0!	#DIV/0!	#DIV/0!	0	0	0	0	0	0	#DIV/0!	#DIV/0!	#DIV/0!	#DIV/0!	#DIV/0!	#DIV/0!	#DIV/0!	0
						#DIV/0!		#DIV/0!															#DIV/0!	#DIV/0!	#DIV/0!	#DIV/0!	#DIV/0!	#DIV/0!	#DIV/0!	#DIV/0!	#DIV/0!	#DIV/0!	#DIV/0!	#DIV/0!	#DIV/0!	0	0	0	0	0	0	#DIV/0!	#DIV/0!	#DIV/0!	#DIV/0!	#DIV/0!	#DIV/0!	#DIV/0!	0
						#DIV/0!		#DIV/0!															#DIV/0!	#DIV/0!	#DIV/0!	#DIV/0!	#DIV/0!	#DIV/0!	#DIV/0!	#DIV/0!	#DIV/0!	#DIV/0!	#DIV/0!	#DIV/0!	#DIV/0!	0	0	0	0	0	0	#DIV/0!	#DIV/0!	#DIV/0!	#DIV/0!	#DIV/0!	#DIV/0!	#DIV/0!	0
						#DIV/0!		#DIV/0!															#DIV/0!	#DIV/0!	#DIV/0!	#DIV/0!	#DIV/0!	#DIV/0!	#DIV/0!	#DIV/0!	#DIV/0!	#DIV/0!	#DIV/0!	#DIV/0!	#DIV/0!	0	0	0	0	0	0	#DIV/0!	#DIV/0!	#DIV/0!	#DIV/0!	#DIV/0!	#DIV/0!	#DIV/0!	0
						#DIV/0!		#DIV/0!															#DIV/0!	#DIV/0!	#DIV/0!	#DIV/0!	#DIV/0!	#DIV/0!	#DIV/0!	#DIV/0!	#DIV/0!	#DIV/0!	#DIV/0!	#DIV/0!	#DIV/0!	0	0	0	0	0	0	#DIV/0!	#DIV/0!	#DIV/0!	#DIV/0!	#DIV/0!	#DIV/0!	#DIV/0!	0
						#DIV/0!		#DIV/0!															#DIV/0!	#DIV/0!	#DIV/0!	#DIV/0!	#DIV/0!	#DIV/0!	#DIV/0!	#DIV/0!	#DIV/0!	#DIV/0!	#DIV/0!	#DIV/0!	#DIV/0!	0	0	0	0	0	0	#DIV/0!	#DIV/0!	#DIV/0!	#DIV/0!	#DIV/0!	#DIV/0!	#DIV/0!	0
						#DIV/0!		#DIV/0!															#DIV/0!	#DIV/0!	#DIV/0!	#DIV/0!	#DIV/0!	#DIV/0!	#DIV/0!	#DIV/0!	#DIV/0!	#DIV/0!	#DIV/0!	#DIV/0!	#DIV/0!	0	0	0	0	0	0	#DIV/0!	#DIV/0!	#DIV/0!	#DIV/0!	#DIV/0!	#DIV/0!	#DIV/0!	0
						#DIV/0!		#DIV/0!															#DIV/0!	#DIV/0!	#DIV/0!	#DIV/0!	#DIV/0!	#DIV/0!	#DIV/0!	#DIV/0!	#DIV/0!	#DIV/0!	#DIV/0!	#DIV/0!	#DIV/0!	0	0	0	0	0	0	#DIV/0!	#DIV/0!	#DIV/0!	#DIV/0!	#DIV/0!	#DIV/0!	#DIV/0!	0
						#DIV/0!		#DIV/0!															#DIV/0!	#DIV/0!	#DIV/0!	#DIV/0!	#DIV/0!	#DIV/0!	#DIV/0!	#DIV/0!	#DIV/0!	#DIV/0!	#DIV/0!	#DIV/0!	#DIV/0!	0	0	0	0	0	0	#DIV/0!	#DIV/0!	#DIV/0!	#DIV/0!	#DIV/0!	#DIV/0!	#DIV/0!	0
						#DIV/0!		#DIV/0!															#DIV/0!	#DIV/0!	#DIV/0!	#DIV/0!	#DIV/0!	#DIV/0!	#DIV/0!	#DIV/0!	#DIV/0!	#DIV/0!	#DIV/0!	#DIV/0!	#DIV/0!	0	0	0	0	0	0	#DIV/0!	#DIV/0!	#DIV/0!	#DIV/0!	#DIV/0!	#DIV/0!	#DIV/0!	0
						#DIV/0!		#DIV/0!															#DIV/0!	#DIV/0!	#DIV/0!	#DIV/0!	#DIV/0!	#DIV/0!	#DIV/0!	#DIV/0!	#DIV/0!	#DIV/0!	#DIV/0!	#DIV/0!	#DIV/0!	0	0	0	0	0	0	#DIV/0!	#DIV/0!	#DIV/0!	#DIV/0!	#DIV/0!	#DIV/0!	#DIV/0!	0
						#DIV/0!		#DIV/0!															#DIV/0!	#DIV/0!	#DIV/0!	#DIV/0!	#DIV/0!	#DIV/0!	#DIV/0!	#DIV/0!	#DIV/0!	#DIV/0!	#DIV/0!	#DIV/0!	#DIV/0!	0	0	0	0	0	0	#DIV/0!	#DIV/0!	#DIV/0!	#DIV/0!	#DIV/0!	#DIV/0!	#DIV/0!	0
						#DIV/0!		#DIV/0!															#DIV/0!	#DIV/0!	#DIV/0!	#DIV/0!	#DIV/0!	#DIV/0!	#DIV/0!	#DIV/0!	#DIV/0!	#DIV/0!	#DIV/0!	#DIV/0!	#DIV/0!	0	0	0	0	0	0	#DIV/0!	#DIV/0!	#DIV/0!	#DIV/0!	#DIV/0!	#DIV/0!	#DIV/0!	0
						#DIV/0!		#DIV/0!															#DIV/0!	#DIV/0!	#DIV/0!	#DIV/0!	#DIV/0!	#DIV/0!	#DIV/0!	#DIV/0!	#DIV/0!	#DIV/0!	#DIV/0!	#DIV/0!	#DIV/0!	0	0	0	0	0	0	#DIV/0!	#DIV/0!	#DIV/0!	#DIV/0!	#DIV/0!	#DIV/0!	#DIV/0!	0
						#DIV/0!		#DIV/0!															#DIV/0!	#DIV/0!	#DIV/0!	#DIV/0!	#DIV/0!	#DIV/0!	#DIV/0!	#DIV/0!	#DIV/0!	#DIV/0!	#DIV/0!	#DIV/0!	#DIV/0!	0	0	0	0	0	0	#DIV/0!	#DIV/0!	#DIV/0!	#DIV/0!	#DIV/0!	#DIV/0!	#DIV/0!	0
						#DIV/0!		#DIV/0!															#DIV/0!	#DIV/0!	#DIV/0!	#DIV/0!	#DIV/0!	#DIV/0!	#DIV/0!	#DIV/0!	#DIV/0!	#DIV/0!	#DIV/0!	#DIV/0!	#DIV/0!	0	0	0	0	0	0	#DIV/0!	#DIV/0!	#DIV/0!	#DIV/0!	#DIV/0!	#DIV/0!	#DIV/0!	0
						#DIV/0!		#DIV/0!															#DIV/0!	#DIV/0!	#DIV/0!	#DIV/0!	#DIV/0!	#DIV/0!	#DIV/0!	#DIV/0!	#DIV/0!	#DIV/0!	#DIV/0!	#DIV/0!	#DIV/0!	0	0	0	0	0	0	#DIV/0!	#DIV/0!	#DIV/0!	#DIV/0!	#DIV/0!	#DIV/0!	#DIV/0!	0
						#DIV/0!		#DIV/0!															#DIV/0!	#DIV/0!	#DIV/0!	#DIV/0!	#DIV/0!	#DIV/0!	#DIV/0!	#DIV/0!	#DIV/0!	#DIV/0!	#DIV/0!	#DIV/0!	#DIV/0!	0	0	0	0	0	0	#DIV/0!	#DIV/0!	#DIV/0!	#DIV/0!	#DIV/0!	#DIV/0!	#DIV/0!	0
						#DIV/0!		#DIV/0!															#DIV/0!	#DIV/0!	#DIV/0!	#DIV/0!	#DIV/0!	#DIV/0!	#DIV/0!	#DIV/0!	#DIV/0!	#DIV/0!	#DIV/0!	#DIV/0!	#DIV/0!	0	0	0	0	0	0	#DIV/0!	#DIV/0!	#DIV/0!	#DIV/0!	#DIV/0!	#DIV/0!	#DIV/0!	0
						#DIV/0!		#DIV/0!															#DIV/0!	#DIV/0!	#DIV/0!	#DIV/0!	#DIV/0!	#DIV/0!	#DIV/0!	#DIV/0!	#DIV/0!	#DIV/0!	#DIV/0!	#DIV/0!	#DIV/0!	0	0	0	0	0	0	#DIV/0!	#DIV/0!	#DIV/0!	#DIV/0!	#DIV/0!	#DIV/0!	#DIV/0!	0
						#DIV/0!		#DIV/0!															#DIV/0!	#DIV/0!	#DIV/0!	#DIV/0!	#DIV/0!	#DIV/0!	#DIV/0!	#DIV/0!	#DIV/0!	#DIV/0!	#DIV/0!	#DIV/0!	#DIV/0!	0	0	0	0	0	0	#DIV/0!	#DIV/0!	#DIV/0!	#DIV/0!	#DIV/0!	#DIV/0!	#DIV/0!	0
						#DIV/0!		#DIV/0!															#DIV/0!	#DIV/0!	#DIV/0!	#DIV/0!	#DIV/0!	#DIV/0!	#DIV/0!	#DIV/0!	#DIV/0!	#DIV/0!	#DIV/0!	#DIV/0!	#DIV/0!	0	0	0	0	0	0	#DIV/0!	#DIV/0!	#DIV/0!	#DIV/0!	#DIV/0!	#DIV/0!	#DIV/0!	0
						#DIV/0!		#DIV/0!															#DIV/0!	#DIV/0!	#DIV/0!	#DIV/0!	#DIV/0!	#DIV/0!	#DIV/0!	#DIV/0!	#DIV/0!	#DIV/0!	#DIV/0!	#DIV/0!	#DIV/0!	0	0	0	0	0	0	#DIV/0!	#DIV/0!	#DIV/0!	#DIV/0!	#DIV/0!	#DIV/0!	#DIV/0!	0
						#DIV/0!		#DIV/0!															#DIV/0!	#DIV/0!	#DIV/0!	#DIV/0!	#DIV/0!	#DIV/0!	#DIV/0!	#DIV/0!	#DIV/0!	#DIV/0!	#DIV/0!	#DIV/0!	#DIV/0!	0	0	0	0	0	0	#DIV/0!	#DIV/0!	#DIV/0!	#DIV/0!	#DIV/0!	#DIV/0!	#DIV/0!	0
						#DIV/0!		#DIV/0!															#DIV/0!	#DIV/0!	#DIV/0!	#DIV/0!	#DIV/0!	#DIV/0!	#DIV/0!	#DIV/0!	#DIV/0!	#DIV/0!	#DIV/0!	#DIV/0!	#DIV/0!	0	0	0	0	0	0	#DIV/0!	#DIV/0!	#DIV/0!	#DIV/0!	#DIV/0!	#DIV/0!	#DIV/0!	0
						#DIV/0!		#DIV/0!															#DIV/0!	#DIV/0!	#DIV/0!	#DIV/0!	#DIV/0!	#DIV/0!	#DIV/0!	#DIV/0!	#DIV/0!	#DIV/0!	#DIV/0!	#DIV/0!	#DIV/0!	0	0	0	0	0	0	#DIV/0!	#DIV/0!	#DIV/0!	#DIV/0!	#DIV/0!	#DIV/0!	#DIV/0!	0
						#DIV/0!		#DIV/0!															#DIV/0!	#DIV/0!	#DIV/0!	#DIV/0!	#DIV/0!	#DIV/0!	#DIV/0!	#DIV/0!	#DIV/0!	#DIV/0!	#DIV/0!	#DIV/0!	#DIV/0!	0	0	0	0	0	0	#DIV/0!	#DIV/0!	#DIV/0!	#DIV/0!	#DIV/0!	#DIV/0!	#DIV/0!	0
						#DIV/0!		#DIV/0!															#DIV/0!	#DIV/0!	#DIV/0!	#DIV/0!	#DIV/0!	#DIV/0!	#DIV/0!	#DIV/0!	#DIV/0!	#DIV/0!	#DIV/0!	#DIV/0!	#DIV/0!	0	0	0	0	0	0	#DIV/0!	#DIV/0!	#DIV/0!	#DIV/0!	#DIV/0!	#DIV/0!	#DIV/0!	0
						#DIV/0!		#DIV/0!															#DIV/0!	#DIV/0!	#DIV/0!	#DIV/0!	#DIV/0!	#DIV/0!	#DIV/0!	#DIV/0!	#DIV/0!	#DIV/0!	#DIV/0!	#DIV/0!	#DIV/0!	0	0	0	0	0	0	#DIV/0!	#DIV/0!	#DIV/0!	#DIV/0!	#DIV/0!	#DIV/0!	#DIV/0!	0
						#DIV/0!		#DIV/0!															#DIV/0!	#DIV/0!	#DIV/0!	#DIV/0!	#DIV/0!	#DIV/0!	#DIV/0!	#DIV/0!	#DIV/0!	#DIV/0!	#DIV/0!	#DIV/0!	#DIV/0!	0	0	0	0	0	0	#DIV/0!	#DIV/0!	#DIV/0!	#DIV/0!	#DIV/0!	#DIV/0!	#DIV/0!	0
						#DIV/0!		#DIV/0!															#DIV/0!	#DIV/0!	#DIV/0!	#DIV/0!	#DIV/0!	#DIV/0!	#DIV/0!	#DIV/0!	#DIV/0!	#DIV/0!	#DIV/0!	#DIV/0!	#DIV/0!	0	0	0	0	0	0	#DIV/0!	#DIV/0!	#DIV/0!	#DIV/0!	#DIV/0!	#DIV/0!	#DIV/0!	0
						#DIV/0!		#DIV/0!															#DIV/0!	#DIV/0!	#DIV/0!	#DIV/0!	#DIV/0!	#DIV/0!	#DIV/0!	#DIV/0!	#DIV/0!	#DIV/0!	#DIV/0!	#DIV/0!	#DIV/0!	0	0	0	0	0	0	#DIV/0!	#DIV/0!	#DIV/0!	#DIV/0!	#DIV/0!	#DIV/0!	#DIV/0!	0
						#DIV/0!		#DIV/0!															#DIV/0!	#DIV/0!	#DIV/0!	#DIV/0!	#DIV/0!	#DIV/0!	#DIV/0!	#DIV/0!	#DIV/0!	#DIV/0!	#DIV/0!	#DIV/0!	#DIV/0!	0	0	0	0	0	0	#DIV/0!	#DIV/0!	#DIV/0!	#DIV/0!	#DIV/0!	#DIV/0!	#DIV/0!	0
						#DIV/0!		#DIV/0!															#DIV/0!	#DIV/0!	#DIV/0!	#DIV/0!	#DIV/0!	#DIV/0!	#DIV/0!	#DIV/0!	#DIV/0!	#DIV/0!	#DIV/0!	#DIV/0!	#DIV/0!	0	0	0	0	0	0	#DIV/0!	#DIV/0!	#DIV/0!	#DIV/0!	#DIV/0!	#DIV/0!	#DIV/0!	0
						#DIV/0!		#DIV/0!															#DIV/0!	#DIV/0!	#DIV/0!	#DIV/0!	#DIV/0!	#DIV/0!	#DIV/0!	#DIV/0!	#DIV/0!	#DIV/0!	#DIV/0!	#DIV/0!	#DIV/0!	0	0	0	0	0	0	#DIV/0!	#DIV/0!	#DIV/0!	#DIV/0!	#DIV/0!	#DIV/0!	#DIV/0!	0
						#DIV/0!		#DIV/0!															#DIV/0!	#DIV/0!	#DIV/0!	#DIV/0!	#DIV/0!	#DIV/0!	#DIV/0!	#DIV/0!	#DIV/0!	#DIV/0!	#DIV/0!	#DIV/0!	#DIV/0!	0	0	0	0	0	0	#DIV/0!	#DIV/0!	#DIV/0!	#DIV/0!	#DIV/0!	#DIV/0!	#DIV/0!	0
						#DIV/0!		#DIV/0!															#DIV/0!	#DIV/0!	#DIV/0!	#DIV/0!	#DIV/0!	#DIV/0!	#DIV/0!	#DIV/0!	#DIV/0!	#DIV/0!	#DIV/0!	#DIV/0!	#DIV/0!	0	0	0	0	0	0	#DIV/0!	#DIV/0!	#DIV/0!	#DIV/0!	#DIV/0!	#DIV/0!	#DIV/0!	0
						#DIV/0!		#DIV/0!															#DIV/0!	#DIV/0!	#DIV/0!	#DIV/0!	#DIV/0!	#DIV/0!	#DIV/0!	#DIV/0!	#DIV/0!	#DIV/0!	#DIV/0!	#DIV/0!	#DIV/0!	0	0	0	0	0	0	#DIV/0!	#DIV/0!	#DIV/0!	#DIV/0!	#DIV/0!	#DIV/0!	#DIV/0!	0
						#DIV/0!		#DIV/0!															#DIV/0!	#DIV/0!	#DIV/0!	#DIV/0!	#DIV/0!	#DIV/0!	#DIV/0!	#DIV/0!	#DIV/0!	#DIV/0!	#DIV/0!	#DIV/0!	#DIV/0!	0	0	0	0	0	0	#DIV/0!	#DIV/0!	#DIV/0!	#DIV/0!	#DIV/0!	#DIV/0!	#DIV/0!	0
						#DIV/0!		#DIV/0!															#DIV/0!	#DIV/0!	#DIV/0!	#DIV/0!	#DIV/0!	#DIV/0!	#DIV/0!	#DIV/0!	#DIV/0!	#DIV/0!	#DIV/0!	#DIV/0!	#DIV/0!	0	0	0	0	0	0	#DIV/0!	#DIV/0!	#DIV/0!	#DIV/0!	#DIV/0!	#DIV/0!	#DIV/0!	0
						#DIV/0!		#DIV/0!															#DIV/0!	#DIV/0!	#DIV/0!	#DIV/0!	#DIV/0!	#DIV/0!	#DIV/0!	#DIV/0!	#DIV/0!	#DIV/0!	#DIV/0!	#DIV/0!	#DIV/0!	0	0	0	0	0	0	#DIV/0!	#DIV/0!	#DIV/0!	#DIV/0!	#DIV/0!	#DIV/0!	#DIV/0!	0
						#DIV/0!		#DIV/0!															#DIV/0!	#DIV/0!	#DIV/0!	#DIV/0!	#DIV/0!	#DIV/0!	#DIV/0!	#DIV/0!	#DIV/0!	#DIV/0!	#DIV/0!	#DIV/0!	#DIV/0!	0	0	0	0	0	0	#DIV/0!	#DIV/0!	#DIV/0!	#DIV/0!	#DIV/0!	#DIV/0!	#DIV/0!	0
						#DIV/0!		#DIV/0!															#DIV/0!	#DIV/0!	#DIV/0!	#DIV/0!	#DIV/0!	#DIV/0!	#DIV/0!	#DIV/0!	#DIV/0!	#DIV/0!	#DIV/0!	#DIV/0!	#DIV/0!	0	0	0	0	0	0	#DIV/0!	#DIV/0!	#DIV/0!	#DIV/0!	#DIV/0!	#DIV/0!	#DIV/0!	0
						#DIV/0!		#DIV/0!															#DIV/0!	#DIV/0!	#DIV/0!	#DIV/0!	#DIV/0!	#DIV/0!	#DIV/0!	#DIV/0!	#DIV/0!	#DIV/0!	#DIV/0!	#DIV/0!	#DIV/0!	0	0	0	0	0	0	#DIV/0!	#DIV/0!	#DIV/0!	#DIV/0!	#DIV/0!	#DIV/0!	#DIV/0!	0
						#DIV/0!		#DIV/0!															#DIV/0!	#DIV/0!	#DIV/0!	#DIV/0!	#DIV/0!	#DIV/0!	#DIV/0!	#DIV/0!	#DIV/0!	#DIV/0!	#DIV/0!	#DIV/0!	#DIV/0!	0	0	0	0	0	0	#DIV/0!	#DIV/0!	#DIV/0!	#DIV/0!	#DIV/0!	#DIV/0!	#DIV/0!	0
						#DIV/0!		#DIV/0!															#DIV/0!	#DIV/0!	#DIV/0!	#DIV/0!	#DIV/0!	#DIV/0!	#DIV/0!	#DIV/0!	#DIV/0!	#DIV/0!	#DIV/0!	#DIV/0!	#DIV/0!	0	0	0	0	0	0	#DIV/0!	#DIV/0!	#DIV/0!	#DIV/0!	#DIV/0!	#DIV/0!	#DIV/0!	0
						#DIV/0!		#DIV/0!															#DIV/0!	#DIV/0!	#DIV/0!	#DIV/0!	#DIV/0!	#DIV/0!	#DIV/0!	#DIV/0!	#DIV/0!	#DIV/0!	#DIV/0!	#DIV/0!	#DIV/0!	0	0	0	0	0	0	#DIV/0!	#DIV/0!	#DIV/0!	#DIV/0!	#DIV/0!	#DIV/0!	#DIV/0!	0
						#DIV/0!		#DIV/0!															#DIV/0!	#DIV/0!	#DIV/0!	#DIV/0!	#DIV/0!	#DIV/0!	#DIV/0!	#DIV/0!	#DIV/0!	#DIV/0!	#DIV/0!	#DIV/0!	#DIV/0!	0	0	0	0	0	0	#DIV/0!	#DIV/0!	#DIV/0!	#DIV/0!	#DIV/0!	#DIV/0!	#DIV/0!	0
						#DIV/0!		#DIV/0!															#DIV/0!	#DIV/0!	#DIV/0!	#DIV/0!	#DIV/0!	#DIV/0!	#DIV/0!	#DIV/0!	#DIV/0!	#DIV/0!	#DIV/0!	#DIV/0!	#DIV/0!	0	0	0	0	0	0	#DIV/0!	#DIV/0!	#DIV/0!	#DIV/0!	#DIV/0!	#DIV/0!	#DIV/0!	0
						#DIV/0!		#DIV/0!															#DIV/0!	#DIV/0!	#DIV/0!	#DIV/0!	#DIV/0!	#DIV/0!	#DIV/0!	#DIV/0!	#DIV/0!	#DIV/0!	#DIV/0!	#DIV/0!	#DIV/0!	0	0	0	0	0	0	#DIV/0!	#DIV/0!	#DIV/0!	#DIV/0!	#DIV/0!	#DIV/0!	#DIV/0!	0
						#DIV/0!		#DIV/0!															#DIV/0!	#DIV/0!	#DIV/0!	#DIV/0!	#DIV/0!	#DIV/0!	#DIV/0!	#DIV/0!	#DIV/0!	#DIV/0!	#DIV/0!	#DIV/0!	#DIV/0!	0	0	0	0	0	0	#DIV/0!	#DIV/0!	#DIV/0!	#DIV/0!	#DIV/0!	#DIV/0!	#DIV/0!	0
						#DIV/0!		#DIV/0!															#DIV/0!	#DIV/0!	#DIV/0!	#DIV/0!	#DIV/0!	#DIV/0!	#DIV/0!	#DIV/0!	#DIV/0!	#DIV/0!	#DIV/0!	#DIV/0!	#DIV/0!	0	0	0	0	0	0	#DIV/0!	#DIV/0!	#DIV/0!	#DIV/0!	#DIV/0!	#DIV/0!	#DIV/0!	0
						#DIV/0!		#DIV/0!															#DIV/0!	#DIV/0!	#DIV/0!	#DIV/0!	#DIV/0!	#DIV/0!	#DIV/0!	#DIV/0!	#DIV/0!	#DIV/0!	#DIV/0!	#DIV/0!	#DIV/0!	0	0	0	0	0	0	#DIV/0!	#DIV/0!	#DIV/0!	#DIV/0!	#DIV/0!	#DIV/0!	#DIV/0!	0
						#DIV/0!		#DIV/0!															#DIV/0!	#DIV/0!	#DIV/0!	#DIV/0!	#DIV/0!	#DIV/0!	#DIV/0!	#DIV/0!	#DIV/0!	#DIV/0!	#DIV/0!	#DIV/0!	#DIV/0!	0	0	0	0	0	0	#DIV/0!	#DIV/0!	#DIV/0!	#DIV/0!	#DIV/0!	#DIV/0!	#DIV/0!	0
						#DIV/0!		#DIV/0!															#DIV/0!	#DIV/0!	#DIV/0!	#DIV/0!	#DIV/0!	#DIV/0!	#DIV/0!	#DIV/0!	#DIV/0!	#DIV/0!	#DIV/0!	#DIV/0!	#DIV/0!	0	0	0	0	0	0	#DIV/0!	#DIV/0!	#DIV/0!	#DIV/0!	#DIV/0!	#DIV/0!	#DIV/0!	0
						#DIV/0!		#DIV/0!															#DIV/0!	#DIV/0!	#DIV/0!	#DIV/0!	#DIV/0!	#DIV/0!	#DIV/0!	#DIV/0!	#DIV/0!	#DIV/0!	#DIV/0!	#DIV/0!	#DIV/0!	0	0	0	0	0	0	#DIV/0!	#DIV/0!	#DIV/0!	#DIV/0!	#DIV/0!	#DIV/0!	#DIV/0!	0
						#DIV/0!		#DIV/0!															#DIV/0!	#DIV/0!	#DIV/0!	#DIV/0!	#DIV/0!	#DIV/0!	#DIV/0!	#DIV/0!	#DIV/0!	#DIV/0!	#DIV/0!	#DIV/0!	#DIV/0!	0	0	0	0	0	0	#DIV/0!	#DIV/0!	#DIV/0!	#DIV/0!	#DIV/0!	#DIV/0!	#DIV/0!	0
						#DIV/0!		#DIV/0!															#DIV/0!	#DIV/0!	#DIV/0!	#DIV/0!	#DIV/0!	#DIV/0!	#DIV/0!	#DIV/0!	#DIV/0!	#DIV/0!	#DIV/0!	#DIV/0!	#DIV/0!	0	0	0	0	0	0	#DIV/0!	#DIV/0!	#DIV/0!	#DIV/0!	#DIV/0!	#DIV/0!	#DIV/0!	0
						#DIV/0!		#DIV/0!															#DIV/0!	#DIV/0!	#DIV/0!	#DIV/0!	#DIV/0!	#DIV/0!	#DIV/0!	#DIV/0!	#DIV/0!	#DIV/0!	#DIV/0!	#DIV/0!	#DIV/0!	0	0	0	0	0	0	#DIV/0!	#DIV/0!	#DIV/0!	#DIV/0!	#DIV/0!	#DIV/0!	#DIV/0!	0
						#DIV/0!		#DIV/0!															#DIV/0!	#DIV/0!	#DIV/0!	#DIV/0!	#DIV/0!	#DIV/0!	#DIV/0!	#DIV/0!	#DIV/0!	#DIV/0!	#DIV/0!	#DIV/0!	#DIV/0!	0	0	0	0	0	0	#DIV/0!	#DIV/0!	#DIV/0!	#DIV/0!	#DIV/0!	#DIV/0!	#DIV/0!	0
						#DIV/0!		#DIV/0!															#DIV/0!	#DIV/0!	#DIV/0!	#DIV/0!	#DIV/0!	#DIV/0!	#DIV/0!	#DIV/0!	#DIV/0!	#DIV/0!	#DIV/0!	#DIV/0!	#DIV/0!	0	0	0	0	0	0	#DIV/0!	#DIV/0!	#DIV/0!	#DIV/0!	#DIV/0!	#DIV/0!	#DIV/0!	0
						#DIV/0!		#DIV/0!															#DIV/0!	#DIV/0!	#DIV/0!	#DIV/0!	#DIV/0!	#DIV/0!	#DIV/0!	#DIV/0!	#DIV/0!	#DIV/0!	#DIV/0!	#DIV/0!	#DIV/0!	0	0	0	0	0	0	#DIV/0!	#DIV/0!	#DIV/0!	#DIV/0!	#DIV/0!	#DIV/0!	#DIV/0!	0
						#DIV/0!		#DIV/0!															#DIV/0!	#DIV/0!	#DIV/0!	#DIV/0!	#DIV/0!	#DIV/0!	#DIV/0!	#DIV/0!	#DIV/0!	#DIV/0!	#DIV/0!	#DIV/0!	#DIV/0!	0	0	0	0	0	0	#DIV/0!	#DIV/0!	#DIV/0!	#DIV/0!	#DIV/0!	#DIV/0!	#DIV/0!	0
						#DIV/0!		#DIV/0!															#DIV/0!	#DIV/0!	#DIV/0!	#DIV/0!	#DIV/0!	#DIV/0!	#DIV/0!	#DIV/0!	#DIV/0!	#DIV/0!	#DIV/0!	#DIV/0!	#DIV/0!	0	0	0	0	0	0	#DIV/0!	#DIV/0!	#DIV/0!	#DIV/0!	#DIV/0!	#DIV/0!	#DIV/0!	0
						#DIV/0!		#DIV/0!															#DIV/0!	#DIV/0!	#DIV/0!	#DIV/0!	#DIV/0!	#DIV/0!	#DIV/0!	#DIV/0!	#DIV/0!	#DIV/0!	#DIV/0!	#DIV/0!	#DIV/0!	0	0	0	0	0	0	#DIV/0!	#DIV/0!	#DIV/0!	#DIV/0!	#DIV/0!	#DIV/0!	#DIV/0!	0
						#DIV/0!		#DIV/0!															#DIV/0!	#DIV/0!	#DIV/0!	#DIV/0!	#DIV/0!	#DIV/0!	#DIV/0!	#DIV/0!	#DIV/0!	#DIV/0!	#DIV/0!	#DIV/0!	#DIV/0!	0	0	0	0	0	0	#DIV/0!	#DIV/0!	#DIV/0!	#DIV/0!	#DIV/0!	#DIV/0!	#DIV/0!	0
						#DIV/0!		#DIV/0!															#DIV/0!	#DIV/0!	#DIV/0!	#DIV/0!	#DIV/0!	#DIV/0!	#DIV/0!	#DIV/0!	#DIV/0!	#DIV/0!	#DIV/0!	#DIV/0!	#DIV/0!	0	0	0	0	0	0	#DIV/0!	#DIV/0!	#DIV/0!	#DIV/0!	#DIV/0!	#DIV/0!	#DIV/0!	0
						#DIV/0!		#DIV/0!															#DIV/0!	#DIV/0!	#DIV/0!	#DIV/0!	#DIV/0!	#DIV/0!	#DIV/0!	#DIV/0!	#DIV/0!	#DIV/0!	#DIV/0!	#DIV/0!	#DIV/0!	0	0	0	0	0	0	#DIV/0!	#DIV/0!	#DIV/0!	#DIV/0!	#DIV/0!	#DIV/0!	#DIV/0!	0
						#DIV/0!		#DIV/0!															#DIV/0!	#DIV/0!	#DIV/0!	#DIV/0!	#DIV/0!	#DIV/0!	#DIV/0!	#DIV/0!	#DIV/0!	#DIV/0!	#DIV/0!	#DIV/0!	#DIV/0!	0	0	0	0	0	0	#DIV/0!	#DIV/0!	#DIV/0!	#DIV/0!	#DIV/0!	#DIV/0!	#DIV/0!	0
[truncated: 33 more columns]

## Sheet: Site5
Date:	15/9/00
Site No. :	5V23
			Width (m)	Length (m)	Area (ha)			Length (m)
	Transect Dimensions:		25	25	0.0625
	Co-ordinates:			X	Y			X
			NW Corner
			SW Corner
			NE Corner
			SE Corner
									OED		OUD	NED		NUD	NFD	OFD	OBE	OBU	NBE	NBU	RE	Notes	Canopy volume (m3)																				Damage
Trans. No.	Sp. Code	Coppice	Height (m)	D1 (m)	D2 (m)	R	Shape	Adj. shape	Score	Eaten		Score	Eaten										Total	0.5	1	2	3	4	5	0.5	1	2	3	4	5	OED	OUD	NED	NUD	NFD	OFD	Old Rec. Vol.	OED	OUD	NED	NUD	NFD	OFD	Sp. Code
1	Gre mon	T	1.4	1.3	1.1	0.6	3	3			1												0.52726	0.387182	0.514962	0.568764	1.31431	3.90449	9.49221	0.387182	0.514962	0.52726	0.52726	0.52726	0.52726	0	5.5	0	0	0	0	0.557947	0	3.06871	0	0	0	0	Gre mon
1	Gre mon	T	0.6	1	0.6	0.4	3	3															0.10043	0.0999655	0.130188	1.37627	6.52798	18.375	39.7072	0.0999655	0.10043	0.10043	0.10043	0.10043	0.10043	0	0	0	0	0	0	0.10043	0	0	0	0	0	0	Gre mon
1	Mae edu	T	0.9	1.3	0.9	0.55	1	1			1												0.855299	0.475166	0.950332	1.90066	2.851	3.80133	4.75166	0.475166	0.855299	0.855299	0.855299	0.855299	0.855299	0	5.5	0	0	0	0	0.905078	0	4.97793	0	0	0	0	Mae edu
1	Mae edu	T	0.7	1	0.8	0.45	1	1															0.445321	0.318086	0.636173	1.27235	1.90852	2.54469	3.18086	0.318086	0.445321	0.445321	0.445321	0.445321	0.445321	0	0	0	0	0	0	0.445321	0	0	0	0	0	0	Mae edu
1	Mae edu	T	0.7	0.5	0.6	0.275	1	1														Browsed	0.166308	0.118791	0.237583	0.475166	0.712749	0.950332	1.18791	0.118791	0.166308	0.166308	0.166308	0.166308	0.166308	0	0	0	0	0	0	0.166308	0	0	0	0	0	0	Mae edu
1	Mae edu	T	0.8	1.9	1.3	0.8	1	1														Browsed	1.6085	1.00531	2.01062	4.02124	6.03186	8.04248	10.0531	1.00531	1.6085	1.6085	1.6085	1.6085	1.6085	0	0	0	0	0	0	1.6085	0	0	0	0	0	0	Mae edu
1	Mae edu	T	0.8	0.9	0.8	0.425	1	1															0.45396	0.283725	0.56745	1.1349	1.70235	2.2698	2.83725	0.283725	0.45396	0.45396	0.45396	0.45396	0.45396	0	0	0	0	0	0	0.45396	0	0	0	0	0	0	Mae edu
1	Mae edu	T	0.8	1.2	1.2	0.6	1	1															0.904779	0.565487	1.13097	2.26195	3.39292	4.52389	5.65487	0.565487	0.904779	0.904779	0.904779	0.904779	0.904779	0	0	0	0	0	0	0.904779	0	0	0	0	0	0	Mae edu
1	Mae edu	T	0.6	1.2	0.6	0.45	1	1															0.381704	0.318086	0.636173	1.27235	1.90852	2.54469	3.18086	0.318086	0.381704	0.381704	0.381704	0.381704	0.381704	0	0	0	0	0	0	0.381704	0	0	0	0	0	0	Mae edu
1	Gre mon	T	2	1.3	1	0.575	3	3															0.691767	0.399928	0.605296	0.691767	0.778238	1.38353	3.02648	0.399928	0.605296	0.691767	0.691767	0.691767	0.691767	0	0	0	0	0	0	0.691767	0	0	0	0	0	0	Gre mon
1	Mae par	T	0.1	0.1	0.1	0.05	1	1															0.000785398	0.00392699	0.00785398	0.015708	0.0235619	0.0314159	0.0392699	0.000785398	0.000785398	0.000785398	0.000785398	0.000785398	0.000785398	0	0	0	0	0	0	0.000785398	0	0	0	0	0	0	Mae par
1	Mae par	T	0.1	0.2	0.1	0.075	1	1															0.00176715	0.00883573	0.0176715	0.0353429	0.0530144	0.0706858	0.0883573	0.00176715	0.00176715	0.00176715	0.00176715	0.00176715	0.00176715	0	0	0	0	0	0	0.00176715	0	0	0	0	0	0	Mae par
1	Mae par	T	0.1	0.1	0.1	0.05	1	1															0.000785398	0.00392699	0.00785398	0.015708	0.0235619	0.0314159	0.0392699	0.000785398	0.000785398	0.000785398	0.000785398	0.000785398	0.000785398	0	0	0	0	0	0	0.000785398	0	0	0	0	0	0	Mae par
1	Mae edu	T	0.6	1.1	1.8	0.725	1	1														Browsed	0.99078	0.82565	1.6513	3.3026	4.9539	6.6052	8.2565	0.82565	0.99078	0.99078	0.99078	0.99078	0.99078	0	0	0	0	0	0	0.99078	0	0	0	0	0	0	Mae edu
1	Mae edu	T	0.6	1.4	1.2	0.65	1	1														Browsed	0.796394	0.663661	1.32732	2.65465	3.98197	5.30929	6.63661	0.663661	0.796394	0.796394	0.796394	0.796394	0.796394	0	0	0	0	0	0	0.796394	0	0	0	0	0	0	Mae edu
1	Dic cin	T	0.2	0.4	0.1	0.125	1	1															0.00981748	0.0245437	0.0490874	0.0981748	0.147262	0.19635	0.245437	0.00981748	0.00981748	0.00981748	0.00981748	0.00981748	0.00981748	0	0	0	0	0	0	0.00981748	0	0	0	0	0	0	Dic cin
1	Mae par	T	0.2	0.1	0.1	0.05	1	1														Browsed	0.0015708	0.00392699	0.00785398	0.015708	0.0235619	0.0314159	0.0392699	0.0015708	0.0015708	0.0015708	0.0015708	0.0015708	0.0015708	0	0	0	0	0	0	0.0015708	0	0	0	0	0	0	Mae par
1	Gre bic	T	1.1	1.4	1.2	0.65	3	3															0.486198	0.407296	0.485833	0.752493	2.99171	9.39521	22.1547	0.407296	0.485833	0.486198	0.486198	0.486198	0.486198	0	0	0	0	0	0	0.486198	0	0	0	0	0	0	Gre bic
1	Mae edu	T	0.8	0.6	0.9	0.375	1	1															0.353429	0.220893	0.441786	0.883573	1.32536	1.76715	2.20893	0.220893	0.353429	0.353429	0.353429	0.353429	0.353429	0	0	0	0	0	0	0.353429	0	0	0	0	0	0	Mae edu
1	Thy afr	T	0.9	0.7	0.2	0.225	1	1															0.143139	0.0795216	0.159043	0.318086	0.477129	0.636173	0.795216	0.0795216	0.143139	0.143139	0.143139	0.143139	0.143139	0	0	0	0	0	0	0.143139	0	0	0	0	0	0	Thy afr
1	Gre mon	T	1	0.7	0.7	0.35	1	1															0.384845	0.192423	0.384845	0.76969	1.15454	1.53938	1.92423	0.192423	0.384845	0.384845	0.384845	0.384845	0.384845	0	0	0	0	0	0	0.384845	0	0	0	0	0	0	Gre mon
1	Thy afr	T	0.2	0.5	0.6	0.275	1	1			4												0.0475166	0.118791	0.237583	0.475166	0.712749	0.950332	1.18791	0.0475166	0.0475166	0.0475166	0.0475166	0.0475166	0.0475166	0	63	0	0	0	0	0.128423	0	8.09066	0	0	0	0	Thy afr
1	Mae edu	T	0.6	1.1	1.1	0.55	1	1			2												0.570199	0.475166	0.950332	1.90066	2.851	3.80133	4.75166	0.475166	0.570199	0.570199	0.570199	0.570199	0.570199	0	18	0	0	0	0	0.695365	0	12.5166	0	0	0	0	Mae edu
1	Mae edu	T	0.8	1.2	0.7	0.475	1	1			1												0.567057	0.354411	0.708822	1.41764	2.12647	2.83529	3.54411	0.354411	0.567057	0.567057	0.567057	0.567057	0.567057	0	5.5	0	0	0	0	0.600061	0	3.30033	0	0	0	0	Mae edu
1	Mae edu	T	0.8	1.8	1.4	0.8	1	1			1											Browsed	1.6085	1.00531	2.01062	4.02124	6.03186	8.04248	10.0531	1.00531	1.6085	1.6085	1.6085	1.6085	1.6085	0	5.5	0	0	0	0	1.70211	0	9.36161	0	0	0	0	Mae edu
1	Mae edu	T	0.7	1	0.8	0.45	1	1			1												0.445321	0.318086	0.636173	1.27235	1.90852	2.54469	3.18086	0.318086	0.445321	0.445321	0.445321	0.445321	0.445321	0	5.5	0	0	0	0	0.471239	0	2.59181	0	0	0	0	Mae edu
1	Mae edu	T	0.5	0.8	0.9	0.425	1	1			1												0.283725	0.283725	0.56745	1.1349	1.70235	2.2698	2.83725	0.283725	0.283725	0.283725	0.283725	0.283725	0.283725	0	5.5	0	0	0	0	0.300238	0	1.65131	0	0	0	0	Mae edu
1	Mae edu	T	0.7	1.2	1.4	0.65	1	1			1												0.929126	0.663661	1.32732	2.65465	3.98197	5.30929	6.63661	0.663661	0.929126	0.929126	0.929126	0.929126	0.929126	0	5.5	0	0	0	0	0.983202	0	5.40761	0	0	0	0	Mae edu
1	Gre mon	T	1.2	1.6	1.3	0.725	3	3															0.659859	0.52888	0.656804	0.855373	2.88688	9.04252	21.6134	0.52888	0.656804	0.659859	0.659859	0.659859	0.659859	0	0	0	0	0	0	0.659859	0	0	0	0	0	0	Gre mon
1	Mae edu	T	0.8	0.7	0.7	0.35	1	1			1												0.307876	0.192423	0.384845	0.76969	1.15454	1.53938	1.92423	0.192423	0.307876	0.307876	0.307876	0.307876	0.307876	0	5.5	0	0	0	0	0.325795	0	1.79187	0	0	0	0	Mae edu
1	Gre mon	T	1	1.4	1	0.6	3	3															0.376614	0.329537	0.376614	0.753228	3.38953	10.5452	24.4799	0.329537	0.376614	0.376614	0.376614	0.376614	0.376614	0	0	0	0	0	0	0.376614	0	0	0	0	0	0	Gre mon
1	Gre bic	T	1.2	1.2	1.3	0.625	3	3			1												0.490383	0.393044	0.488113	0.635682	2.14543	6.72006	16.0623	0.393044	0.488113	0.490383	0.490383	0.490383	0.490383	0	5.5	0	0	0	0	0.518924	0	2.85408	0	0	0	0	Gre bic
1	Gre bic	T	1.1	1.5	1.3	0.7	1	1															1.69332	0.76969	1.53938	3.07876	4.61814	6.15752	7.6969	0.76969	1.53938	1.69332	1.69332	1.69332	1.69332	0	0	0	0	0	0	1.69332	0	0	0	0	0	0	Gre bic
1	Mae edu	T	0.5	1.2	0.5	0.425	1	1															0.283725	0.283725	0.56745	1.1349	1.70235	2.2698	2.83725	0.283725	0.283725	0.283725	0.283725	0.283725	0.283725	0	0	0	0	0	0	0.283725	0	0	0	0	0	0	Mae edu
1	Mae edu	T	0.6	1.2	0.8	0.5	1	1															0.471239	0.392699	0.785398	1.5708	2.35619	3.14159	3.92699	0.392699	0.471239	0.471239	0.471239	0.471239	0.471239	0	0	0	0	0	0	0.471239	0	0	0	0	0	0	Mae edu
1	Mae edu	T	0.8	0.8	1	0.45	1	1			1												0.508938	0.318086	0.636173	1.27235	1.90852	2.54469	3.18086	0.318086	0.508938	0.508938	0.508938	0.508938	0.508938	0	5.5	0	0	0	0	0.538559	0	2.96207	0	0	0	0	Mae edu
1	Mae edu	T	1	1.1	1.1	0.55	1	1															0.950332	0.475166	0.950332	1.90066	2.851	3.80133	4.75166	0.475166	0.950332	0.950332	0.950332	0.950332	0.950332	0	0	0	0	0	0	0.950332	0	0	0	0	0	0	Mae edu
1	Gre mon	T	1.5	1.2	1.2	0.6	3	3															0.564921	0.397537	0.543998	0.585844	1.12984	3.1803	7.74151	0.397537	0.543998	0.564921	0.564921	0.564921	0.564921	0	0	0	0	0	0	0.564921	0	0	0	0	0	0	Gre mon
1	Gre mon	T	1.2	1.5	0.8	0.575	3	3															0.41506	0.332673	0.413139	0.538041	1.81589	5.68786	13.5951	0.332673	0.413139	0.41506	0.41506	0.41506	0.41506	0	0	0	0	0	0	0.41506	0	0	0	0	0	0	Gre mon
1	Mae edu	T	1	1.3	1.6	0.725	1	1															1.6513	0.82565	1.6513	3.3026	4.9539	6.6052	8.2565	0.82565	1.6513	1.6513	1.6513	1.6513	1.6513	0	0	0	0	0	0	1.6513	0	0	0	0	0	0	Mae edu
1	Mae edu	T	0.8	1.2	1.4	0.65	1	1														Browsed	1.06186	0.663661	1.32732	2.65465	3.98197	5.30929	6.63661	0.663661	1.06186	1.06186	1.06186	1.06186	1.06186	0	0	0	0	0	0	1.06186	0	0	0	0	0	0	Mae edu
1	Mae edu	T	0.8	0.7	1.2	0.475	3	3															0.18883	0.178872	0.191781	0.826132	4.11591	12.274	27.5131	0.178872	0.18883	0.18883	0.18883	0.18883	0.18883	0	0	0	0	0	0	0.18883	0	0	0	0	0	0	Mae edu
1	Mae edu	T	0.8	1.4	0.9	0.575	1	1			1											Browsed	0.830951	0.519345	1.03869	2.07738	3.11607	4.15476	5.19345	0.519345	0.830951	0.830951	0.830951	0.830951	0.830951	0	5.5	0	0	0	0	0.879313	0	4.83622	0	0	0	0	Mae edu
1	Gre mon	T	1.2	1.2	0.8	0.5	1	1			1												0.942478	0.392699	0.785398	1.5708	2.35619	3.14159	3.92699	0.392699	0.785398	0.942478	0.942478	0.942478	0.942478	0	5.5	0	0	0	0	0.997331	0	5.48532	0	0	0	0	Gre mon
1	Gre bic	T	1.8	1.8	1.1	0.725	3	3															0.989789	0.616921	0.902894	0.991147	1.28306	2.79693	6.55107	0.616921	0.902894	0.989789	0.989789	0.989789	0.989789	0	0	0	0	0	0	0.989789	0	0	0	0	0	0	Gre bic
1	Mae edu	T	0.5	1.1	1.1	0.55	1	1															0.475166	0.475166	0.950332	1.90066	2.851	3.80133	4.75166	0.475166	0.475166	0.475166	0.475166	0.475166	0.475166	0	0	0	0	0	0	0.475166	0	0	0	0	0	0	Mae edu
1	Gre bic	T	0.8	0.5	0.4	0.225	3	3															0.0423691	0.0401348	0.0430311	0.185365	0.923514	2.75399	6.17331	0.0401348	0.0423691	0.0423691	0.0423691	0.0423691	0.0423691	0	0	0	0	0	0	0.0423691	0	0	0	0	0	0	Gre bic
1	Mae edu	T	0.4	0.4	0.3	0.175	1	1															0.0384845	0.0481056	0.0962113	0.192423	0.288634	0.384845	0.481056	0.0384845	0.0384845	0.0384845	0.0384845	0.0384845	0.0384845	0	0	0	0	0	0	0.0384845	0	0	0	0	0	0	Mae edu
1	Mae edu	T	0.3	0.8	0.3	0.275	1	1															0.0712749	0.118791	0.237583	0.475166	0.712749	0.950332	1.18791	0.0712749	0.0712749	0.0712749	0.0712749	0.0712749	0.0712749	0	0	0	0	0	0	0.0712749	0	0	0	0	0	0	Mae edu
1	Gre ina	T	0.4	0.3	0.3	0.15	1	1															0.0282743	0.0353429	0.0706858	0.141372	0.212058	0.282743	0.353429	0.0282743	0.0282743	0.0282743	0.0282743	0.0282743	0.0282743	0	0	0	0	0	0	0.0282743	0	0	0	0	0	0	Gre ina
1	Gre ina	T	1	0.7	1	0.425	3	3														Browsed	0.188961	0.165341	0.188961	0.377922	1.70065	5.29091	12.2825	0.165341	0.188961	0.188961	0.188961	0.188961	0.188961	0	0	0	0	0	0	0.188961	0	0	0	0	0	0	Gre ina
1	Mae edu	T	0.5	0.4	0.3	0.175	1	1															0.0481056	0.0481056	0.0962113	0.192423	0.288634	0.384845	0.481056	0.0481056	0.0481056	0.0481056	0.0481056	0.0481056	0.0481056	0	0	0	0	0	0	0.0481056	0	0	0	0	0	0	Mae edu
1	Mae edu	T	0.8	0.7	0.6	0.325	1	1															0.265465	0.165915	0.331831	0.663661	0.995492	1.32732	1.65915	0.165915	0.265465	0.265465	0.265465	0.265465	0.265465	0	0	0	0	0	0	0.265465	0	0	0	0	0	0	Mae edu
1	Mae edu	T	0.9	1.2	1.4	0.65	1	1														Browsed	1.19459	0.663661	1.32732	2.65465	3.98197	5.30929	6.63661	0.663661	1.19459	1.19459	1.19459	1.19459	1.19459	0	0	0	0	0	0	1.19459	0	0	0	0	0	0	Mae edu
1	Mae edu	T	0.8	1.5	1.5	0.75	1	1															1.41372	0.883573	1.76715	3.53429	5.30144	7.06858	8.83573	0.883573	1.41372	1.41372	1.41372	1.41372	1.41372	0	0	0	0	0	0	1.41372	0	0	0	0	0	0	Mae edu
1	Gre mon	T	1.3	1.3	1.3	0.65	3	3															0.574598	0.440691	0.567537	0.664305	1.85953	5.72244	13.8223	0.440691	0.567537	0.574598	0.574598	0.574598	0.574598	0	0	0	0	0	0	0.574598	0	0	0	0	0	0	Gre mon
1	Gre mon	T	1.6	1.3	1.4	0.675	3	3															0.762644	0.514822	0.722426	0.77456	1.27356	3.33657	8.08075	0.514822	0.722426	0.762644	0.762644	0.762644	0.762644	0	0	0	0	0	0	0.762644	0	0	0	0	0	0	Gre mon
1	Mae par	T	0.1	0.1	0.1	0.05	1	1															0.000785398	0.00392699	0.00785398	0.015708	0.0235619	0.0314159	0.0392699	0.000785398	0.000785398	0.000785398	0.000785398	0.000785398	0.000785398	0	0	0	0	0	0	0.000785398	0	0	0	0	0	0	Mae par
1	Mae edu	T	0.9	1.2	0.9	0.525	1	1														Browsed	0.779311	0.432951	0.865901	1.7318	2.5977	3.46361	4.32951	0.432951	0.779311	0.779311	0.779311	0.779311	0.779311	0	0	0	0	0	0	0.779311	0	0	0	0	0	0	Mae edu
1	Gre bic	T	1.3	0.9	1.1	0.5	3	3															0.339999	0.260764	0.33582	0.39308	1.10031	3.38606	8.17885	0.260764	0.33582	0.339999	0.339999	0.339999	0.339999	0	0	0	0	0	0	0.339999	0	0	0	0	0	0	Gre bic
1	Gre bic	T	2.1	1.5	1.7	0.8	3	3															1.40603	0.784162	1.20395	1.40587	1.5167	2.44738	5.10882	0.784162	1.20395	1.40587	1.40603	1.40603	1.40603	0	0	0	0	0	0	1.40603	0	0	0	0	0	0	Gre bic
1	Mae edu	T	0.7	0.9	0.9	0.45	1	1														Browsed	0.445321	0.318086	0.636173	1.27235	1.90852	2.54469	3.18086	0.318086	0.445321	0.445321	0.445321	0.445321	0.445321	0	0	0	0	0	0	0.445321	0	0	0	0	0	0	Mae edu
1	Gre mon	T	2.2	2.2	1.2	0.85	3	3															1.66286	0.895612	1.393	1.66161	1.74281	2.57362	5.09101	0.895612	1.393	1.66161	1.66286	1.66286	1.66286	0	0	0	0	0	0	1.66286	0	0	0	0	0	0	Gre mon
1	Gre mon	T	1.3	0.8	1.4	0.55	3	3															0.411399	0.315524	0.406343	0.475627	1.33138	4.09713	9.89641	0.315524	0.406343	0.411399	0.411399	0.411399	0.411399	0	0	0	0	0	0	0.411399	0	0	0	0	0	0	Gre mon
1	Gre bic	T	2.5	1.6	1.8	0.85	3	3	1														1.88961	0.922129	1.48145	1.87449	1.90473	2.29776	3.77922	0.922129	1.48145	1.87449	1.88961	1.88961	1.88961	5.5	0	0	0	0	0	1.99959	10.9977	0	0	0	0	0	Gre bic
1	Mae edu	T	0.4	0.8	0.4	0.3	1	1															0.113097	0.141372	0.282743	0.565487	0.84823	1.13097	1.41372	0.113097	0.113097	0.113097	0.113097	0.113097	0.113097	0	0	0	0	0	0	0.113097	0	0	0	0	0	0	Mae edu
1	Mae edu	T	0.2	0.3	0.4	0.175	1	1															0.0192423	0.0481056	0.0962113	0.192423	0.288634	0.384845	0.481056	0.0192423	0.0192423	0.0192423	0.0192423	0.0192423	0.0192423	0	0	0	0	0	0	0.0192423	0	0	0	0	0	0	Mae edu
1	Mae edu	T	0.5	0.9	0.8	0.425	1	1															0.283725	0.283725	0.56745	1.1349	1.70235	2.2698	2.83725	0.283725	0.283725	0.283725	0.283725	0.283725	0.283725	0	0	0	0	0	0	0.283725	0	0	0	0	0	0	Mae edu
1	Gre bic	T	2	1.2	1.7	0.725	3	3			1												1.09977	0.635802	0.962295	1.09977	1.23724	2.19953	4.81147	0.635802	0.962295	1.09977	1.09977	1.09977	1.09977	0	5.5	0	0	0	0	1.16377	0	6.40075	0	0	0	0	Gre bic
1	Mae edu	T	0.6	0.7	0.5	0.3	1	1															0.169646	0.141372	0.282743	0.565487	0.84823	1.13097	1.41372	0.141372	0.169646	0.169646	0.169646	0.169646	0.169646	0	0	0	0	0	0	0.169646	0	0	0	0	0	0	Mae edu
1	Mae edu	T	0.4	0.4	0.3	0.175	1	1															0.0384845	0.0481056	0.0962113	0.192423	0.288634	0.384845	0.481056	0.0384845	0.0384845	0.0384845	0.0384845	0.0384845	0.0384845	0	0	0	0	0	0	0.0384845	0	0	0	0	0	0	Mae edu
1	Mae edu	T	0.6	0.4	0.4	0.2	1	1			1											Browsed	0.0753982	0.0628319	0.125664	0.251327	0.376991	0.502655	0.628319	0.0628319	0.0753982	0.0753982	0.0753982	0.0753982	0.0753982	0	5.5	0	0	0	0	0.0797865	0	0.438826	0	0	0	0	Mae edu
1	Gre bic	T	1.8	1.4	1.5	0.725	3	3															0.989789	0.616921	0.902894	0.991147	1.28306	2.79693	6.55107	0.616921	0.902894	0.989789	0.989789	0.989789	0.989789	0	0	0	0	0	0	0.989789	0	0	0	0	0	0	Gre bic
1	Gre ina	T	1	0.5	0.4	0.225	1	1															0.159043	0.0795216	0.159043	0.318086	0.477129	0.636173	0.795216	0.0795216	0.159043	0.159043	0.159043	0.159043	0.159043	0	0	0	0	0	0	0.159043	0	0	0	0	0	0	Gre ina
1	Mae edu	T	0.6	0.6	0.6	0.3	1	1															0.169646	0.141372	0.282743	0.565487	0.84823	1.13097	1.41372	0.141372	0.169646	0.169646	0.169646	0.169646	0.169646	0	0	0	0	0	0	0.169646	0	0	0	0	0	0	Mae edu
1	Mae edu	T	0.2	0.1	0.1	0.05	1	1															0.0015708	0.00392699	0.00785398	0.015708	0.0235619	0.0314159	0.0392699	0.0015708	0.0015708	0.0015708	0.0015708	0.0015708	0.0015708	0	0	0	0	0	0	0.0015708	0	0	0	0	0	0	Mae edu
1	Mae edu	T	0.8	0.7	0.7	0.35	1	1														Browsed	0.307876	0.192423	0.384845	0.76969	1.15454	1.53938	1.92423	0.192423	0.307876	0.307876	0.307876	0.307876	0.307876	0	0	0	0	0	0	0.307876	0	0	0	0	0	0	Mae edu
1	Mae edu	T	0.6	0.5	0.3	0.2	1	1			1											Browsed	0.0753982	0.0628319	0.125664	0.251327	0.376991	0.502655	0.628319	0.0628319	0.0753982	0.0753982	0.0753982	0.0753982	0.0753982	0	5.5	0	0	0	0	0.0797865	0	0.438826	0	0	0	0	Mae edu
1	Mae edu	T	0.4	0.5	0.3	0.2	1	1															0.0502655	0.0628319	0.125664	0.251327	0.376991	0.502655	0.628319	0.0502655	0.0502655	0.0502655	0.0502655	0.0502655	0.0502655	0	0	0	0	0	0	0.0502655	0	0	0	0	0	0	Mae edu
1	Gre ina	T	0.3	0.6	0.2	0.2	1	1															0.0376991	0.0628319	0.125664	0.251327	0.376991	0.502655	0.628319	0.0376991	0.0376991	0.0376991	0.0376991	0.0376991	0.0376991	0	0	0	0	0	0	0.0376991	0	0	0	0	0	0	Gre ina
1	Mae edu	T	0.6	0.4	0.6	0.25	1	1															0.11781	0.0981748	0.19635	0.392699	0.589049	0.785398	0.981748	0.0981748	0.11781	0.11781	0.11781	0.11781	0.11781	0	0	0	0	0	0	0.11781	0	0	0	0	0	0	Mae edu
1	Mae edu	T	0.6	1.2	0.9	0.525	3	3														Browsed	0.173007	0.172206	0.224268	2.37084	11.2455	31.6539	68.4019	0.172206	0.173007	0.173007	0.173007	0.173007	0.173007	0	0	0	0	0	0	0.173007	0	0	0	0	0	0	Mae edu
1	Mae edu	T	0.8	0.3	0.3	0.15	1	1															0.0565487	0.0353429	0.0706858	0.141372	0.212058	0.282743	0.353429	0.0353429	0.0565487	0.0565487	0.0565487	0.0565487	0.0565487	0	0	0	0	0	0	0.0565487	0	0	0	0	0	0	Mae edu
1	Gre ina	T	0.5	0.6	0.3	0.225	1	1														Browsed	0.0795216	0.0795216	0.159043	0.318086	0.477129	0.636173	0.795216	0.0795216	0.0795216	0.0795216	0.0795216	0.0795216	0.0795216	0	0	0	0	0	0	0.0795216	0	0	0	0	0	0	Gre ina
1	Gre bic	T	1.5	1.2	1.1	0.575	3	3															0.518825	0.365099	0.499609	0.538041	1.03765	2.92079	7.10983	0.365099	0.499609	0.518825	0.518825	0.518825	0.518825	0	0	0	0	0	0	0.518825	0	0	0	0	0	0	Gre bic
1	Gre bic	T	0.5	1.7	2.1	0.95	3	3	1														0.472075	0.472075	0.944151	13.2181	59.4815	162.394	344.615	0.472075	0.472075	0.472075	0.472075	0.472075	0.472075	5.5	0	0	0	0	0	0.499551	2.74753	0	0	0	0	0	Gre bic
1	Mae edu	T	0.5	1.1	0.4	0.375	1	1															0.220893	0.220893	0.441786	0.883573	1.32536	1.76715	2.20893	0.220893	0.220893	0.220893	0.220893	0.220893	0.220893	0	0	0	0	0	0	0.220893	0	0	0	0	0	0	Mae edu
1	Gre mon	T	1.6	1.3	1.5	0.7	3	3															0.820182	0.553663	0.77693	0.832997	1.36964	3.5883	8.6904	0.553663	0.77693	0.820182	0.820182	0.820182	0.820182	0	0	0	0	0	0	0.820182	0	0	0	0	0	0	Gre mon
1	Mae edu	T	0.8	1.1	1	0.525	1	1														Browsed	0.692721	0.432951	0.865901	1.7318	2.5977	3.46361	4.32951	0.432951	0.692721	0.692721	0.692721	0.692721	0.692721	0	0	0	0	0	0	0.692721	0	0	0	0	0	0	Mae edu
1	Mae edu	T	0.6	1	0.5	0.375	1	1														Browsed	0.265072	0.220893	0.441786	0.883573	1.32536	1.76715	2.20893	0.220893	0.265072	0.265072	0.265072	0.265072	0.265072	0	0	0	0	0	0	0.265072	0	0	0	0	0	0	Mae edu
1	Mae edu	T	0.6	1.2	1.2	0.6	1	1			1											Browsed	0.678584	0.565487	1.13097	2.26195	3.39292	4.52389	5.65487	0.565487	0.678584	0.678584	0.678584	0.678584	0.678584	0	5.5	0	0	0	0	0.718078	0	3.94943	0	0	0	0	Mae edu
1	Gre bic	T	1.6	1.7	1.8	0.875	3	3															1.28153	0.865098	1.21395	1.30156	2.14006	5.60671	13.5788	0.865098	1.21395	1.28153	1.28153	1.28153	1.28153	0	0	0	0	0	0	1.28153	0	0	0	0	0	0	Gre bic
1	Gre bic	T	1.3	1.7	0.8	0.625	3	3															0.531248	0.407443	0.524719	0.614188	1.71924	5.29072	12.7795	0.407443	0.524719	0.531248	0.531248	0.531248	0.531248	0	0	0	0	0	0	0.531248	0	0	0	0	0	0	Gre bic
1	Gre bic	T	1.4	1.3	0.6	0.475	3	3															0.330453	0.242661	0.322745	0.356465	0.823723	2.44708	5.94911	0.242661	0.322745	0.330453	0.330453	0.330453	0.330453	0	0	0	0	0	0	0.330453	0	0	0	0	0	0	Gre bic
1	Col mop	T	2.1	2.3	2.3	1.15	1	1	2		2												8.72499	2.07738	4.15476	8.30951	12.4643	16.619	20.7738	2.07738	4.15476	8.30951	8.72499	8.72499	8.72499	18	18	0	0	0	0	13.6328	245.39	245.39	0	0	0	0	Col mop
						#DIV/0!		#DIV/0!															#DIV/0!	#DIV/0!	#DIV/0!	#DIV/0!	#DIV/0!	#DIV/0!	#DIV/0!	#DIV/0!	#DIV/0!	#DIV/0!	#DIV/0!	#DIV/0!	#DIV/0!	0	0	0	0	0	0	#DIV/0!	#DIV/0!	#DIV/0!	#DIV/0!	#DIV/0!	#DIV/0!	#DIV/0!	0
						#DIV/0!		#DIV/0!															#DIV/0!	#DIV/0!	#DIV/0!	#DIV/0!	#DIV/0!	#DIV/0!	#DIV/0!	#DIV/0!	#DIV/0!	#DIV/0!	#DIV/0!	#DIV/0!	#DIV/0!	0	0	0	0	0	0	#DIV/0!	#DIV/0!	#DIV/0!	#DIV/0!	#DIV/0!	#DIV/0!	#DIV/0!	0
						#DIV/0!		#DIV/0!															#DIV/0!	#DIV/0!	#DIV/0!	#DIV/0!	#DIV/0!	#DIV/0!	#DIV/0!	#DIV/0!	#DIV/0!	#DIV/0!	#DIV/0!	#DIV/0!	#DIV/0!	0	0	0	0	0	0	#DIV/0!	#DIV/0!	#DIV/0!	#DIV/0!	#DIV/0!	#DIV/0!	#DIV/0!	0
						#DIV/0!		#DIV/0!															#DIV/0!	#DIV/0!	#DIV/0!	#DIV/0!	#DIV/0!	#DIV/0!	#DIV/0!	#DIV/0!	#DIV/0!	#DIV/0!	#DIV/0!	#DIV/0!	#DIV/0!	0	0	0	0	0	0	#DIV/0!	#DIV/0!	#DIV/0!	#DIV/0!	#DIV/0!	#DIV/0!	#DIV/0!	0
						#DIV/0!		#DIV/0!															#DIV/0!	#DIV/0!	#DIV/0!	#DIV/0!	#DIV/0!	#DIV/0!	#DIV/0!	#DIV/0!	#DIV/0!	#DIV/0!	#DIV/0!	#DIV/0!	#DIV/0!	0	0	0	0	0	0	#DIV/0!	#DIV/0!	#DIV/0!	#DIV/0!	#DIV/0!	#DIV/0!	#DIV/0!	0
						#DIV/0!		#DIV/0!															#DIV/0!	#DIV/0!	#DIV/0!	#DIV/0!	#DIV/0!	#DIV/0!	#DIV/0!	#DIV/0!	#DIV/0!	#DIV/0!	#DIV/0!	#DIV/0!	#DIV/0!	0	0	0	0	0	0	#DIV/0!	#DIV/0!	#DIV/0!	#DIV/0!	#DIV/0!	#DIV/0!	#DIV/0!	0
						#DIV/0!		#DIV/0!															#DIV/0!	#DIV/0!	#DIV/0!	#DIV/0!	#DIV/0!	#DIV/0!	#DIV/0!	#DIV/0!	#DIV/0!	#DIV/0!	#DIV/0!	#DIV/0!	#DIV/0!	0	0	0	0	0	0	#DIV/0!	#DIV/0!	#DIV/0!	#DIV/0!	#DIV/0!	#DIV/0!	#DIV/0!	0
						#DIV/0!		#DIV/0!															#DIV/0!	#DIV/0!	#DIV/0!	#DIV/0!	#DIV/0!	#DIV/0!	#DIV/0!	#DIV/0!	#DIV/0!	#DIV/0!	#DIV/0!	#DIV/0!	#DIV/0!	0	0	0	0	0	0	#DIV/0!	#DIV/0!	#DIV/0!	#DIV/0!	#DIV/0!	#DIV/0!	#DIV/0!	0
						#DIV/0!		#DIV/0!															#DIV/0!	#DIV/0!	#DIV/0!	#DIV/0!	#DIV/0!	#DIV/0!	#DIV/0!	#DIV/0!	#DIV/0!	#DIV/0!	#DIV/0!	#DIV/0!	#DIV/0!	0	0	0	0	0	0	#DIV/0!	#DIV/0!	#DIV/0!	#DIV/0!	#DIV/0!	#DIV/0!	#DIV/0!	0
						#DIV/0!		#DIV/0!															#DIV/0!	#DIV/0!	#DIV/0!	#DIV/0!	#DIV/0!	#DIV/0!	#DIV/0!	#DIV/0!	#DIV/0!	#DIV/0!	#DIV/0!	#DIV/0!	#DIV/0!	0	0	0	0	0	0	#DIV/0!	#DIV/0!	#DIV/0!	#DIV/0!	#DIV/0!	#DIV/0!	#DIV/0!	0
						#DIV/0!		#DIV/0!															#DIV/0!	#DIV/0!	#DIV/0!	#DIV/0!	#DIV/0!	#DIV/0!	#DIV/0!	#DIV/0!	#DIV/0!	#DIV/0!	#DIV/0!	#DIV/0!	#DIV/0!	0	0	0	0	0	0	#DIV/0!	#DIV/0!	#DIV/0!	#DIV/0!	#DIV/0!	#DIV/0!	#DIV/0!	0
						#DIV/0!		#DIV/0!															#DIV/0!	#DIV/0!	#DIV/0!	#DIV/0!	#DIV/0!	#DIV/0!	#DIV/0!	#DIV/0!	#DIV/0!	#DIV/0!	#DIV/0!	#DIV/0!	#DIV/0!	0	0	0	0	0	0	#DIV/0!	#DIV/0!	#DIV/0!	#DIV/0!	#DIV/0!	#DIV/0!	#DIV/0!	0
						#DIV/0!		#DIV/0!															#DIV/0!	#DIV/0!	#DIV/0!	#DIV/0!	#DIV/0!	#DIV/0!	#DIV/0!	#DIV/0!	#DIV/0!	#DIV/0!	#DIV/0!	#DIV/0!	#DIV/0!	0	0	0	0	0	0	#DIV/0!	#DIV/0!	#DIV/0!	#DIV/0!	#DIV/0!	#DIV/0!	#DIV/0!	0
						#DIV/0!		#DIV/0!															#DIV/0!	#DIV/0!	#DIV/0!	#DIV/0!	#DIV/0!	#DIV/0!	#DIV/0!	#DIV/0!	#DIV/0!	#DIV/0!	#DIV/0!	#DIV/0!	#DIV/0!	0	0	0	0	0	0	#DIV/0!	#DIV/0!	#DIV/0!	#DIV/0!	#DIV/0!	#DIV/0!	#DIV/0!	0
						#DIV/0!		#DIV/0!															#DIV/0!	#DIV/0!	#DIV/0!	#DIV/0!	#DIV/0!	#DIV/0!	#DIV/0!	#DIV/0!	#DIV/0!	#DIV/0!	#DIV/0!	#DIV/0!	#DIV/0!	0	0	0	0	0	0	#DIV/0!	#DIV/0!	#DIV/0!	#DIV/0!	#DIV/0!	#DIV/0!	#DIV/0!	0
						#DIV/0!		#DIV/0!															#DIV/0!	#DIV/0!	#DIV/0!	#DIV/0!	#DIV/0!	#DIV/0!	#DIV/0!	#DIV/0!	#DIV/0!	#DIV/0!	#DIV/0!	#DIV/0!	#DIV/0!	0	0	0	0	0	0	#DIV/0!	#DIV/0!	#DIV/0!	#DIV/0!	#DIV/0!	#DIV/0!	#DIV/0!	0
						#DIV/0!		#DIV/0!															#DIV/0!	#DIV/0!	#DIV/0!	#DIV/0!	#DIV/0!	#DIV/0!	#DIV/0!	#DIV/0!	#DIV/0!	#DIV/0!	#DIV/0!	#DIV/0!	#DIV/0!	0	0	0	0	0	0	#DIV/0!	#DIV/0!	#DIV/0!	#DIV/0!	#DIV/0!	#DIV/0!	#DIV/0!	0
						#DIV/0!		#DIV/0!															#DIV/0!	#DIV/0!	#DIV/0!	#DIV/0!	#DIV/0!	#DIV/0!	#DIV/0!	#DIV/0!	#DIV/0!	#DIV/0!	#DIV/0!	#DIV/0!	#DIV/0!	0	0	0	0	0	0	#DIV/0!	#DIV/0!	#DIV/0!	#DIV/0!	#DIV/0!	#DIV/0!	#DIV/0!	0
						#DIV/0!		#DIV/0!															#DIV/0!	#DIV/0!	#DIV/0!	#DIV/0!	#DIV/0!	#DIV/0!	#DIV/0!	#DIV/0!	#DIV/0!	#DIV/0!	#DIV/0!	#DIV/0!	#DIV/0!	0	0	0	0	0	0	#DIV/0!	#DIV/0!	#DIV/0!	#DIV/0!	#DIV/0!	#DIV/0!	#DIV/0!	0
						#DIV/0!		#DIV/0!															#DIV/0!	#DIV/0!	#DIV/0!	#DIV/0!	#DIV/0!	#DIV/0!	#DIV/0!	#DIV/0!	#DIV/0!	#DIV/0!	#DIV/0!	#DIV/0!	#DIV/0!	0	0	0	0	0	0	#DIV/0!	#DIV/0!	#DIV/0!	#DIV/0!	#DIV/0!	#DIV/0!	#DIV/0!	0
						#DIV/0!		#DIV/0!															#DIV/0!	#DIV/0!	#DIV/0!	#DIV/0!	#DIV/0!	#DIV/0!	#DIV/0!	#DIV/0!	#DIV/0!	#DIV/0!	#DIV/0!	#DIV/0!	#DIV/0!	0	0	0	0	0	0	#DIV/0!	#DIV/0!	#DIV/0!	#DIV/0!	#DIV/0!	#DIV/0!	#DIV/0!	0
						#DIV/0!		#DIV/0!															#DIV/0!	#DIV/0!	#DIV/0!	#DIV/0!	#DIV/0!	#DIV/0!	#DIV/0!	#DIV/0!	#DIV/0!	#DIV/0!	#DIV/0!	#DIV/0!	#DIV/0!	0	0	0	0	0	0	#DIV/0!	#DIV/0!	#DIV/0!	#DIV/0!	#DIV/0!	#DIV/0!	#DIV/0!	0
						#DIV/0!		#DIV/0!															#DIV/0!	#DIV/0!	#DIV/0!	#DIV/0!	#DIV/0!	#DIV/0!	#DIV/0!	#DIV/0!	#DIV/0!	#DIV/0!	#DIV/0!	#DIV/0!	#DIV/0!	0	0	0	0	0	0	#DIV/0!	#DIV/0!	#DIV/0!	#DIV/0!	#DIV/0!	#DIV/0!	#DIV/0!	0
						#DIV/0!		#DIV/0!															#DIV/0!	#DIV/0!	#DIV/0!	#DIV/0!	#DIV/0!	#DIV/0!	#DIV/0!	#DIV/0!	#DIV/0!	#DIV/0!	#DIV/0!	#DIV/0!	#DIV/0!	0	0	0	0	0	0	#DIV/0!	#DIV/0!	#DIV/0!	#DIV/0!	#DIV/0!	#DIV/0!	#DIV/0!	0
						#DIV/0!		#DIV/0!															#DIV/0!	#DIV/0!	#DIV/0!	#DIV/0!	#DIV/0!	#DIV/0!	#DIV/0!	#DIV/0!	#DIV/0!	#DIV/0!	#DIV/0!	#DIV/0!	#DIV/0!	0	0	0	0	0	0	#DIV/0!	#DIV/0!	#DIV/0!	#DIV/0!	#DIV/0!	#DIV/0!	#DIV/0!	0
						#DIV/0!		#DIV/0!															#DIV/0!	#DIV/0!	#DIV/0!	#DIV/0!	#DIV/0!	#DIV/0!	#DIV/0!	#DIV/0!	#DIV/0!	#DIV/0!	#DIV/0!	#DIV/0!	#DIV/0!	0	0	0	0	0	0	#DIV/0!	#DIV/0!	#DIV/0!	#DIV/0!	#DIV/0!	#DIV/0!	#DIV/0!	0
						#DIV/0!		#DIV/0!															#DIV/0!	#DIV/0!	#DIV/0!	#DIV/0!	#DIV/0!	#DIV/0!	#DIV/0!	#DIV/0!	#DIV/0!	#DIV/0!	#DIV/0!	#DIV/0!	#DIV/0!	0	0	0	0	0	0	#DIV/0!	#DIV/0!	#DIV/0!	#DIV/0!	#DIV/0!	#DIV/0!	#DIV/0!	0
						#DIV/0!		#DIV/0!															#DIV/0!	#DIV/0!	#DIV/0!	#DIV/0!	#DIV/0!	#DIV/0!	#DIV/0!	#DIV/0!	#DIV/0!	#DIV/0!	#DIV/0!	#DIV/0!	#DIV/0!	0	0	0	0	0	0	#DIV/0!	#DIV/0!	#DIV/0!	#DIV/0!	#DIV/0!	#DIV/0!	#DIV/0!	0
						#DIV/0!		#DIV/0!															#DIV/0!	#DIV/0!	#DIV/0!	#DIV/0!	#DIV/0!	#DIV/0!	#DIV/0!	#DIV/0!	#DIV/0!	#DIV/0!	#DIV/0!	#DIV/0!	#DIV/0!	0	0	0	0	0	0	#DIV/0!	#DIV/0!	#DIV/0!	#DIV/0!	#DIV/0!	#DIV/0!	#DIV/0!	0
						#DIV/0!		#DIV/0!															#DIV/0!	#DIV/0!	#DIV/0!	#DIV/0!	#DIV/0!	#DIV/0!	#DIV/0!	#DIV/0!	#DIV/0!	#DIV/0!	#DIV/0!	#DIV/0!	#DIV/0!	0	0	0	0	0	0	#DIV/0!	#DIV/0!	#DIV/0!	#DIV/0!	#DIV/0!	#DIV/0!	#DIV/0!	0
						#DIV/0!		#DIV/0!															#DIV/0!	#DIV/0!	#DIV/0!	#DIV/0!	#DIV/0!	#DIV/0!	#DIV/0!	#DIV/0!	#DIV/0!	#DIV/0!	#DIV/0!	#DIV/0!	#DIV/0!	0	0	0	0	0	0	#DIV/0!	#DIV/0!	#DIV/0!	#DIV/0!	#DIV/0!	#DIV/0!	#DIV/0!	0
						#DIV/0!		#DIV/0!															#DIV/0!	#DIV/0!	#DIV/0!	#DIV/0!	#DIV/0!	#DIV/0!	#DIV/0!	#DIV/0!	#DIV/0!	#DIV/0!	#DIV/0!	#DIV/0!	#DIV/0!	0	0	0	0	0	0	#DIV/0!	#DIV/0!	#DIV/0!	#DIV/0!	#DIV/0!	#DIV/0!	#DIV/0!	0
						#DIV/0!		#DIV/0!															#DIV/0!	#DIV/0!	#DIV/0!	#DIV/0!	#DIV/0!	#DIV/0!	#DIV/0!	#DIV/0!	#DIV/0!	#DIV/0!	#DIV/0!	#DIV/0!	#DIV/0!	0	0	0	0	0	0	#DIV/0!	#DIV/0!	#DIV/0!	#DIV/0!	#DIV/0!	#DIV/0!	#DIV/0!	0
						#DIV/0!		#DIV/0!															#DIV/0!	#DIV/0!	#DIV/0!	#DIV/0!	#DIV/0!	#DIV/0!	#DIV/0!	#DIV/0!	#DIV/0!	#DIV/0!	#DIV/0!	#DIV/0!	#DIV/0!	0	0	0	0	0	0	#DIV/0!	#DIV/0!	#DIV/0!	#DIV/0!	#DIV/0!	#DIV/0!	#DIV/0!	0
						#DIV/0!		#DIV/0!															#DIV/0!	#DIV/0!	#DIV/0!	#DIV/0!	#DIV/0!	#DIV/0!	#DIV/0!	#DIV/0!	#DIV/0!	#DIV/0!	#DIV/0!	#DIV/0!	#DIV/0!	0	0	0	0	0	0	#DIV/0!	#DIV/0!	#DIV/0!	#DIV/0!	#DIV/0!	#DIV/0!	#DIV/0!	0
						#DIV/0!		#DIV/0!															#DIV/0!	#DIV/0!	#DIV/0!	#DIV/0!	#DIV/0!	#DIV/0!	#DIV/0!	#DIV/0!	#DIV/0!	#DIV/0!	#DIV/0!	#DIV/0!	#DIV/0!	0	0	0	0	0	0	#DIV/0!	#DIV/0!	#DIV/0!	#DIV/0!	#DIV/0!	#DIV/0!	#DIV/0!	0
						#DIV/0!		#DIV/0!															#DIV/0!	#DIV/0!	#DIV/0!	#DIV/0!	#DIV/0!	#DIV/0!	#DIV/0!	#DIV/0!	#DIV/0!	#DIV/0!	#DIV/0!	#DIV/0!	#DIV/0!	0	0	0	0	0	0	#DIV/0!	#DIV/0!	#DIV/0!	#DIV/0!	#DIV/0!	#DIV/0!	#DIV/0!	0
						#DIV/0!		#DIV/0!															#DIV/0!	#DIV/0!	#DIV/0!	#DIV/0!	#DIV/0!	#DIV/0!	#DIV/0!	#DIV/0!	#DIV/0!	#DIV/0!	#DIV/0!	#DIV/0!	#DIV/0!	0	0	0	0	0	0	#DIV/0!	#DIV/0!	#DIV/0!	#DIV/0!	#DIV/0!	#DIV/0!	#DIV/0!	0
						#DIV/0!		#DIV/0!															#DIV/0!	#DIV/0!	#DIV/0!	#DIV/0!	#DIV/0!	#DIV/0!	#DIV/0!	#DIV/0!	#DIV/0!	#DIV/0!	#DIV/0!	#DIV/0!	#DIV/0!	0	0	0	0	0	0	#DIV/0!	#DIV/0!	#DIV/0!	#DIV/0!	#DIV/0!	#DIV/0!	#DIV/0!	0
						#DIV/0!		#DIV/0!															#DIV/0!	#DIV/0!	#DIV/0!	#DIV/0!	#DIV/0!	#DIV/0!	#DIV/0!	#DIV/0!	#DIV/0!	#DIV/0!	#DIV/0!	#DIV/0!	#DIV/0!	0	0	0	0	0	0	#DIV/0!	#DIV/0!	#DIV/0!	#DIV/0!	#DIV/0!	#DIV/0!	#DIV/0!	0
						#DIV/0!		#DIV/0!															#DIV/0!	#DIV/0!	#DIV/0!	#DIV/0!	#DIV/0!	#DIV/0!	#DIV/0!	#DIV/0!	#DIV/0!	#DIV/0!	#DIV/0!	#DIV/0!	#DIV/0!	0	0	0	0	0	0	#DIV/0!	#DIV/0!	#DIV/0!	#DIV/0!	#DIV/0!	#DIV/0!	#DIV/0!	0
						#DIV/0!		#DIV/0!															#DIV/0!	#DIV/0!	#DIV/0!	#DIV/0!	#DIV/0!	#DIV/0!	#DIV/0!	#DIV/0!	#DIV/0!	#DIV/0!	#DIV/0!	#DIV/0!	#DIV/0!	0	0	0	0	0	0	#DIV/0!	#DIV/0!	#DIV/0!	#DIV/0!	#DIV/0!	#DIV/0!	#DIV/0!	0
						#DIV/0!		#DIV/0!															#DIV/0!	#DIV/0!	#DIV/0!	#DIV/0!	#DIV/0!	#DIV/0!	#DIV/0!	#DIV/0!	#DIV/0!	#DIV/0!	#DIV/0!	#DIV/0!	#DIV/0!	0	0	0	0	0	0	#DIV/0!	#DIV/0!	#DIV/0!	#DIV/0!	#DIV/0!	#DIV/0!	#DIV/0!	0
						#DIV/0!		#DIV/0!															#DIV/0!	#DIV/0!	#DIV/0!	#DIV/0!	#DIV/0!	#DIV/0!	#DIV/0!	#DIV/0!	#DIV/0!	#DIV/0!	#DIV/0!	#DIV/0!	#DIV/0!	0	0	0	0	0	0	#DIV/0!	#DIV/0!	#DIV/0!	#DIV/0!	#DIV/0!	#DIV/0!	#DIV/0!	0
						#DIV/0!		#DIV/0!															#DIV/0!	#DIV/0!	#DIV/0!	#DIV/0!	#DIV/0!	#DIV/0!	#DIV/0!	#DIV/0!	#DIV/0!	#DIV/0!	#DIV/0!	#DIV/0!	#DIV/0!	0	0	0	0	0	0	#DIV/0!	#DIV/0!	#DIV/0!	#DIV/0!	#DIV/0!	#DIV/0!	#DIV/0!	0
						#DIV/0!		#DIV/0!															#DIV/0!	#DIV/0!	#DIV/0!	#DIV/0!	#DIV/0!	#DIV/0!	#DIV/0!	#DIV/0!	#DIV/0!	#DIV/0!	#DIV/0!	#DIV/0!	#DIV/0!	0	0	0	0	0	0	#DIV/0!	#DIV/0!	#DIV/0!	#DIV/0!	#DIV/0!	#DIV/0!	#DIV/0!	0
						#DIV/0!		#DIV/0!															#DIV/0!	#DIV/0!	#DIV/0!	#DIV/0!	#DIV/0!	#DIV/0!	#DIV/0!	#DIV/0!	#DIV/0!	#DIV/0!	#DIV/0!	#DIV/0!	#DIV/0!	0	0	0	0	0	0	#DIV/0!	#DIV/0!	#DIV/0!	#DIV/0!	#DIV/0!	#DIV/0!	#DIV/0!	0
						#DIV/0!		#DIV/0!															#DIV/0!	#DIV/0!	#DIV/0!	#DIV/0!	#DIV/0!	#DIV/0!	#DIV/0!	#DIV/0!	#DIV/0!	#DIV/0!	#DIV/0!	#DIV/0!	#DIV/0!	0	0	0	0	0	0	#DIV/0!	#DIV/0!	#DIV/0!	#DIV/0!	#DIV/0!	#DIV/0!	#DIV/0!	0
						#DIV/0!		#DIV/0!															#DIV/0!	#DIV/0!	#DIV/0!	#DIV/0!	#DIV/0!	#DIV/0!	#DIV/0!	#DIV/0!	#DIV/0!	#DIV/0!	#DIV/0!	#DIV/0!	#DIV/0!	0	0	0	0	0	0	#DIV/0!	#DIV/0!	#DIV/0!	#DIV/0!	#DIV/0!	#DIV/0!	#DIV/0!	0
						#DIV/0!		#DIV/0!															#DIV/0!	#DIV/0!	#DIV/0!	#DIV/0!	#DIV/0!	#DIV/0!	#DIV/0!	#DIV/0!	#DIV/0!	#DIV/0!	#DIV/0!	#DIV/0!	#DIV/0!	0	0	0	0	0	0	#DIV/0!	#DIV/0!	#DIV/0!	#DIV/0!	#DIV/0!	#DIV/0!	#DIV/0!	0
						#DIV/0!		#DIV/0!															#DIV/0!	#DIV/0!	#DIV/0!	#DIV/0!	#DIV/0!	#DIV/0!	#DIV/0!	#DIV/0!	#DIV/0!	#DIV/0!	#DIV/0!	#DIV/0!	#DIV/0!	0	0	0	0	0	0	#DIV/0!	#DIV/0!	#DIV/0!	#DIV/0!	#DIV/0!	#DIV/0!	#DIV/0!	0
						#DIV/0!		#DIV/0!															#DIV/0!	#DIV/0!	#DIV/0!	#DIV/0!	#DIV/0!	#DIV/0!	#DIV/0!	#DIV/0!	#DIV/0!	#DIV/0!	#DIV/0!	#DIV/0!	#DIV/0!	0	0	0	0	0	0	#DIV/0!	#DIV/0!	#DIV/0!	#DIV/0!	#DIV/0!	#DIV/0!	#DIV/0!	0
						#DIV/0!		#DIV/0!															#DIV/0!	#DIV/0!	#DIV/0!	#DIV/0!	#DIV/0!	#DIV/0!	#DIV/0!	#DIV/0!	#DIV/0!	#DIV/0!	#DIV/0!	#DIV/0!	#DIV/0!	0	0	0	0	0	0	#DIV/0!	#DIV/0!	#DIV/0!	#DIV/0!	#DIV/0!	#DIV/0!	#DIV/0!	0
						#DIV/0!		#DIV/0!															#DIV/0!	#DIV/0!	#DIV/0!	#DIV/0!	#DIV/0!	#DIV/0!	#DIV/0!	#DIV/0!	#DIV/0!	#DIV/0!	#DIV/0!	#DIV/0!	#DIV/0!	0	0	0	0	0	0	#DIV/0!	#DIV/0!	#DIV/0!	#DIV/0!	#DIV/0!	#DIV/0!	#DIV/0!	0
						#DIV/0!		#DIV/0!															#DIV/0!	#DIV/0!	#DIV/0!	#DIV/0!	#DIV/0!	#DIV/0!	#DIV/0!	#DIV/0!	#DIV/0!	#DIV/0!	#DIV/0!	#DIV/0!	#DIV/0!	0	0	0	0	0	0	#DIV/0!	#DIV/0!	#DIV/0!	#DIV/0!	#DIV/0!	#DIV/0!	#DIV/0!	0
						#DIV/0!		#DIV/0!															#DIV/0!	#DIV/0!	#DIV/0!	#DIV/0!	#DIV/0!	#DIV/0!	#DIV/0!	#DIV/0!	#DIV/0!	#DIV/0!	#DIV/0!	#DIV/0!	#DIV/0!	0	0	0	0	0	0	#DIV/0!	#DIV/0!	#DIV/0!	#DIV/0!	#DIV/0!	#DIV/0!	#DIV/0!	0
						#DIV/0!		#DIV/0!															#DIV/0!	#DIV/0!	#DIV/0!	#DIV/0!	#DIV/0!	#DIV/0!	#DIV/0!	#DIV/0!	#DIV/0!	#DIV/0!	#DIV/0!	#DIV/0!	#DIV/0!	0	0	0	0	0	0	#DIV/0!	#DIV/0!	#DIV/0!	#DIV/0!	#DIV/0!	#DIV/0!	#DIV/0!	0
						#DIV/0!		#DIV/0!															#DIV/0!	#DIV/0!	#DIV/0!	#DIV/0!	#DIV/0!	#DIV/0!	#DIV/0!	#DIV/0!	#DIV/0!	#DIV/0!	#DIV/0!	#DIV/0!	#DIV/0!	0	0	0	0	0	0	#DIV/0!	#DIV/0!	#DIV/0!	#DIV/0!	#DIV/0!	#DIV/0!	#DIV/0!	0
						#DIV/0!		#DIV/0!															#DIV/0!	#DIV/0!	#DIV/0!	#DIV/0!	#DIV/0!	#DIV/0!	#DIV/0!	#DIV/0!	#DIV/0!	#DIV/0!	#DIV/0!	#DIV/0!	#DIV/0!	0	0	0	0	0	0	#DIV/0!	#DIV/0!	#DIV/0!	#DIV/0!	#DIV/0!	#DIV/0!	#DIV/0!	0
						#DIV/0!		#DIV/0!															#DIV/0!	#DIV/0!	#DIV/0!	#DIV/0!	#DIV/0!	#DIV/0!	#DIV/0!	#DIV/0!	#DIV/0!	#DIV/0!	#DIV/0!	#DIV/0!	#DIV/0!	0	0	0	0	0	0	#DIV/0!	#DIV/0!	#DIV/0!	#DIV/0!	#DIV/0!	#DIV/0!	#DIV/0!	0
						#DIV/0!		#DIV/0!															#DIV/0!	#DIV/0!	#DIV/0!	#DIV/0!	#DIV/0!	#DIV/0!	#DIV/0!	#DIV/0!	#DIV/0!	#DIV/0!	#DIV/0!	#DIV/0!	#DIV/0!	0	0	0	0	0	0	#DIV/0!	#DIV/0!	#DIV/0!	#DIV/0!	#DIV/0!	#DIV/0!	#DIV/0!	0
						#DIV/0!		#DIV/0!															#DIV/0!	#DIV/0!	#DIV/0!	#DIV/0!	#DIV/0!	#DIV/0!	#DIV/0!	#DIV/0!	#DIV/0!	#DIV/0!	#DIV/0!	#DIV/0!	#DIV/0!	0	0	0	0	0	0	#DIV/0!	#DIV/0!	#DIV/0!	#DIV/0!	#DIV/0!	#DIV/0!	#DIV/0!	0
						#DIV/0!		#DIV/0!															#DIV/0!	#DIV/0!	#DIV/0!	#DIV/0!	#DIV/0!	#DIV/0!	#DIV/0!	#DIV/0!	#DIV/0!	#DIV/0!	#DIV/0!	#DIV/0!	#DIV/0!	0	0	0	0	0	0	#DIV/0!	#DIV/0!	#DIV/0!	#DIV/0!	#DIV/0!	#DIV/0!	#DIV/0!	0
						#DIV/0!		#DIV/0!															#DIV/0!	#DIV/0!	#DIV/0!	#DIV/0!	#DIV/0!	#DIV/0!	#DIV/0!	#DIV/0!	#DIV/0!	#DIV/0!	#DIV/0!	#DIV/0!	#DIV/0!	0	0	0	0	0	0	#DIV/0!	#DIV/0!	#DIV/0!	#DIV/0!	#DIV/0!	#DIV/0!	#DIV/0!	0
						#DIV/0!		#DIV/0!															#DIV/0!	#DIV/0!	#DIV/0!	#DIV/0!	#DIV/0!	#DIV/0!	#DIV/0!	#DIV/0!	#DIV/0!	#DIV/0!	#DIV/0!	#DIV/0!	#DIV/0!	0	0	0	0	0	0	#DIV/0!	#DIV/0!	#DIV/0!	#DIV/0!	#DIV/0!	#DIV/0!	#DIV/0!	0
						#DIV/0!		#DIV/0!															#DIV/0!	#DIV/0!	#DIV/0!	#DIV/0!	#DIV/0!	#DIV/0!	#DIV/0!	#DIV/0!	#DIV/0!	#DIV/0!	#DIV/0!	#DIV/0!	#DIV/0!	0	0	0	0	0	0	#DIV/0!	#DIV/0!	#DIV/0!	#DIV/0!	#DIV/0!	#DIV/0!	#DIV/0!	0
						#DIV/0!		#DIV/0!															#DIV/0!	#DIV/0!	#DIV/0!	#DIV/0!	#DIV/0!	#DIV/0!	#DIV/0!	#DIV/0!	#DIV/0!	#DIV/0!	#DIV/0!	#DIV/0!	#DIV/0!	0	0	0	0	0	0	#DIV/0!	#DIV/0!	#DIV/0!	#DIV/0!	#DIV/0!	#DIV/0!	#DIV/0!	0
						#DIV/0!		#DIV/0!															#DIV/0!	#DIV/0!	#DIV/0!	#DIV/0!	#DIV/0!	#DIV/0!	#DIV/0!	#DIV/0!	#DIV/0!	#DIV/0!	#DIV/0!	#DIV/0!	#DIV/0!	0	0	0	0	0	0	#DIV/0!	#DIV/0!	#DIV/0!	#DIV/0!	#DIV/0!	#DIV/0!	#DIV/0!	0
						#DIV/0!		#DIV/0!															#DIV/0!	#DIV/0!	#DIV/0!	#DIV/0!	#DIV/0!	#DIV/0!	#DIV/0!	#DIV/0!	#DIV/0!	#DIV/0!	#DIV/0!	#DIV/0!	#DIV/0!	0	0	0	0	0	0	#DIV/0!	#DIV/0!	#DIV/0!	#DIV/0!	#DIV/0!	#DIV/0!	#DIV/0!	0
						#DIV/0!		#DIV/0!															#DIV/0!	#DIV/0!	#DIV/0!	#DIV/0!	#DIV/0!	#DIV/0!	#DIV/0!	#DIV/0!	#DIV/0!	#DIV/0!	#DIV/0!	#DIV/0!	#DIV/0!	0	0	0	0	0	0	#DIV/0!	#DIV/0!	#DIV/0!	#DIV/0!	#DIV/0!	#DIV/0!	#DIV/0!	0
						#DIV/0!		#DIV/0!															#DIV/0!	#DIV/0!	#DIV/0!	#DIV/0!	#DIV/0!	#DIV/0!	#DIV/0!	#DIV/0!	#DIV/0!	#DIV/0!	#DIV/0!	#DIV/0!	#DIV/0!	0	0	0	0	0	0	#DIV/0!	#DIV/0!	#DIV/0!	#DIV/0!	#DIV/0!	#DIV/0!	#DIV/0!	0
						#DIV/0!		#DIV/0!															#DIV/0!	#DIV/0!	#DIV/0!	#DIV/0!	#DIV/0!	#DIV/0!	#DIV/0!	#DIV/0!	#DIV/0!	#DIV/0!	#DIV/0!	#DIV/0!	#DIV/0!	0	0	0	0	0	0	#DIV/0!	#DIV/0!	#DIV/0!	#DIV/0!	#DIV/0!	#DIV/0!	#DIV/0!	0
						#DIV/0!		#DIV/0!															#DIV/0!	#DIV/0!	#DIV/0!	#DIV/0!	#DIV/0!	#DIV/0!	#DIV/0!	#DIV/0!	#DIV/0!	#DIV/0!	#DIV/0!	#DIV/0!	#DIV/0!	0	0	0	0	0	0	#DIV/0!	#DIV/0!	#DIV/0!	#DIV/0!	#DIV/0!	#DIV/0!	#DIV/0!	0
						#DIV/0!		#DIV/0!															#DIV/0!	#DIV/0!	#DIV/0!	#DIV/0!	#DIV/0!	#DIV/0!	#DIV/0!	#DIV/0!	#DIV/0!	#DIV/0!	#DIV/0!	#DIV/0!	#DIV/0!	0	0	0	0	0	0	#DIV/0!	#DIV/0!	#DIV/0!	#DIV/0!	#DIV/0!	#DIV/0!	#DIV/0!	0
						#DIV/0!		#DIV/0!															#DIV/0!	#DIV/0!	#DIV/0!	#DIV/0!	#DIV/0!	#DIV/0!	#DIV/0!	#DIV/0!	#DIV/0!	#DIV/0!	#DIV/0!	#DIV/0!	#DIV/0!	0	0	0	0	0	0	#DIV/0!	#DIV/0!	#DIV/0!	#DIV/0!	#DIV/0!	#DIV/0!	#DIV/0!	0
						#DIV/0!		#DIV/0!															#DIV/0!	#DIV/0!	#DIV/0!	#DIV/0!	#DIV/0!	#DIV/0!	#DIV/0!	#DIV/0!	#DIV/0!	#DIV/0!	#DIV/0!	#DIV/0!	#DIV/0!	0	0	0	0	0	0	#DIV/0!	#DIV/0!	#DIV/0!	#DIV/0!	#DIV/0!	#DIV/0!	#DIV/0!	0
						#DIV/0!		#DIV/0!															#DIV/0!	#DIV/0!	#DIV/0!	#DIV/0!	#DIV/0!	#DIV/0!	#DIV/0!	#DIV/0!	#DIV/0!	#DIV/0!	#DIV/0!	#DIV/0!	#DIV/0!	0	0	0	0	0	0	#DIV/0!	#DIV/0!	#DIV/0!	#DIV/0!	#DIV/0!	#DIV/0!	#DIV/0!	0
						#DIV/0!		#DIV/0!															#DIV/0!	#DIV/0!	#DIV/0!	#DIV/0!	#DIV/0!	#DIV/0!	#DIV/0!	#DIV/0!	#DIV/0!	#DIV/0!	#DIV/0!	#DIV/0!	#DIV/0!	0	0	0	0	0	0	#DIV/0!	#DIV/0!	#DIV/0!	#DIV/0!	#DIV/0!	#DIV/0!	#DIV/0!	0
						#DIV/0!		#DIV/0!															#DIV/0!	#DIV/0!	#DIV/0!	#DIV/0!	#DIV/0!	#DIV/0!	#DIV/0!	#DIV/0!	#DIV/0!	#DIV/0!	#DIV/0!	#DIV/0!	#DIV/0!	0	0	0	0	0	0	#DIV/0!	#DIV/0!	#DIV/0!	#DIV/0!	#DIV/0!	#DIV/0!	#DIV/0!	0
						#DIV/0!		#DIV/0!															#DIV/0!	#DIV/0!	#DIV/0!	#DIV/0!	#DIV/0!	#DIV/0!	#DIV/0!	#DIV/0!	#DIV/0!	#DIV/0!	#DIV/0!	#DIV/0!	#DIV/0!	0	0	0	0	0	0	#DIV/0!	#DIV/0!	#DIV/0!	#DIV/0!	#DIV/0!	#DIV/0!	#DIV/0!	0
						#DIV/0!		#DIV/0!															#DIV/0!	#DIV/0!	#DIV/0!	#DIV/0!	#DIV/0!	#DIV/0!	#DIV/0!	#DIV/0!	#DIV/0!	#DIV/0!	#DIV/0!	#DIV/0!	#DIV/0!	0	0	0	0	0	0	#DIV/0!	#DIV/0!	#DIV/0!	#DIV/0!	#DIV/0!	#DIV/0!	#DIV/0!	0
						#DIV/0!		#DIV/0!															#DIV/0!	#DIV/0!	#DIV/0!	#DIV/0!	#DIV/0!	#DIV/0!	#DIV/0!	#DIV/0!	#DIV/0!	#DIV/0!	#DIV/0!	#DIV/0!	#DIV/0!	0	0	0	0	0	0	#DIV/0!	#DIV/0!	#DIV/0!	#DIV/0!	#DIV/0!	#DIV/0!	#DIV/0!	0
						#DIV/0!		#DIV/0!															#DIV/0!	#DIV/0!	#DIV/0!	#DIV/0!	#DIV/0!	#DIV/0!	#DIV/0!	#DIV/0!	#DIV/0!	#DIV/0!	#DIV/0!	#DIV/0!	#DIV/0!	0	0	0	0	0	0	#DIV/0!	#DIV/0!	#DIV/0!	#DIV/0!	#DIV/0!	#DIV/0!	#DIV/0!	0
						#DIV/0!		#DIV/0!															#DIV/0!	#DIV/0!	#DIV/0!	#DIV/0!	#DIV/0!	#DIV/0!	#DIV/0!	#DIV/0!	#DIV/0!	#DIV/0!	#DIV/0!	#DIV/0!	#DIV/0!	0	0	0	0	0	0	#DIV/0!	#DIV/0!	#DIV/0!	#DIV/0!	#DIV/0!	#DIV/0!	#DIV/0!	0
						#DIV/0!		#DIV/0!															#DIV/0!	#DIV/0!	#DIV/0!	#DIV/0!	#DIV/0!	#DIV/0!	#DIV/0!	#DIV/0!	#DIV/0!	#DIV/0!	#DIV/0!	#DIV/0!	#DIV/0!	0	0	0	0	0	0	#DIV/0!	#DIV/0!	#DIV/0!	#DIV/0!	#DIV/0!	#DIV/0!	#DIV/0!	0
						#DIV/0!		#DIV/0!															#DIV/0!	#DIV/0!	#DIV/0!	#DIV/0!	#DIV/0!	#DIV/0!	#DIV/0!	#DIV/0!	#DIV/0!	#DIV/0!	#DIV/0!	#DIV/0!	#DIV/0!	0	0	0	0	0	0	#DIV/0!	#DIV/0!	#DIV/0!	#DIV/0!	#DIV/0!	#DIV/0!	#DIV/0!	0
						#DIV/0!		#DIV/0!															#DIV/0!	#DIV/0!	#DIV/0!	#DIV/0!	#DIV/0!	#DIV/0!	#DIV/0!	#DIV/0!	#DIV/0!	#DIV/0!	#DIV/0!	#DIV/0!	#DIV/0!	0	0	0	0	0	0	#DIV/0!	#DIV/0!	#DIV/0!	#DIV/0!	#DIV/0!	#DIV/0!	#DIV/0!	0
						#DIV/0!		#DIV/0!															#DIV/0!	#DIV/0!	#DIV/0!	#DIV/0!	#DIV/0!	#DIV/0!	#DIV/0!	#DIV/0!	#DIV/0!	#DIV/0!	#DIV/0!	#DIV/0!	#DIV/0!	0	0	0	0	0	0	#DIV/0!	#DIV/0!	#DIV/0!	#DIV/0!	#DIV/0!	#DIV/0!	#DIV/0!	0
						#DIV/0!		#DIV/0!															#DIV/0!	#DIV/0!	#DIV/0!	#DIV/0!	#DIV/0!	#DIV/0!	#DIV/0!	#DIV/0!	#DIV/0!	#DIV/0!	#DIV/0!	#DIV/0!	#DIV/0!	0	0	0	0	0	0	#DIV/0!	#DIV/0!	#DIV/0!	#DIV/0!	#DIV/0!	#DIV/0!	#DIV/0!	0
						#DIV/0!		#DIV/0!															#DIV/0!	#DIV/0!	#DIV/0!	#DIV/0!	#DIV/0!	#DIV/0!	#DIV/0!	#DIV/0!	#DIV/0!	#DIV/0!	#DIV/0!	#DIV/0!	#DIV/0!	0	0	0	0	0	0	#DIV/0!	#DIV/0!	#DIV/0!	#DIV/0!	#DIV/0!	#DIV/0!	#DIV/0!	0
						#DIV/0!		#DIV/0!															#DIV/0!	#DIV/0!	#DIV/0!	#DIV/0!	#DIV/0!	#DIV/0!	#DIV/0!	#DIV/0!	#DIV/0!	#DIV/0!	#DIV/0!	#DIV/0!	#DIV/0!	0	0	0	0	0	0	#DIV/0!	#DIV/0!	#DIV/0!	#DIV/0!	#DIV/0!	#DIV/0!	#DIV/0!	0
						#DIV/0!		#DIV/0!															#DIV/0!	#DIV/0!	#DIV/0!	#DIV/0!	#DIV/0!	#DIV/0!	#DIV/0!	#DIV/0!	#DIV/0!	#DIV/0!	#DIV/0!	#DIV/0!	#DIV/0!	0	0	0	0	0	0	#DIV/0!	#DIV/0!	#DIV/0!	#DIV/0!	#DIV/0!	#DIV/0!	#DIV/0!	0
						#DIV/0!		#DIV/0!															#DIV/0!	#DIV/0!	#DIV/0!	#DIV/0!	#DIV/0!	#DIV/0!	#DIV/0!	#DIV/0!	#DIV/0!	#DIV/0!	#DIV/0!	#DIV/0!	#DIV/0!	0	0	0	0	0	0	#DIV/0!	#DIV/0!	#DIV/0!	#DIV/0!	#DIV/0!	#DIV/0!	#DIV/0!	0
						#DIV/0!		#DIV/0!															#DIV/0!	#DIV/0!	#DIV/0!	#DIV/0!	#DIV/0!	#DIV/0!	#DIV/0!	#DIV/0!	#DIV/0!	#DIV/0!	#DIV/0!	#DIV/0!	#DIV/0!	0	0	0	0	0	0	#DIV/0!	#DIV/0!	#DIV/0!	#DIV/0!	#DIV/0!	#DIV/0!	#DIV/0!	0
						#DIV/0!		#DIV/0!															#DIV/0!	#DIV/0!	#DIV/0!	#DIV/0!	#DIV/0!	#DIV/0!	#DIV/0!	#DIV/0!	#DIV/0!	#DIV/0!	#DIV/0!	#DIV/0!	#DIV/0!	0	0	0	0	0	0	#DIV/0!	#DIV/0!	#DIV/0!	#DIV/0!	#DIV/0!	#DIV/0!	#DIV/0!	0
						#DIV/0!		#DIV/0!															#DIV/0!	#DIV/0!	#DIV/0!	#DIV/0!	#DIV/0!	#DIV/0!	#DIV/0!	#DIV/0!	#DIV/0!	#DIV/0!	#DIV/0!	#DIV/0!	#DIV/0!	0	0	0	0	0	0	#DIV/0!	#DIV/0!	#DIV/0!	#DIV/0!	#DIV/0!	#DIV/0!	#DIV/0!	0
						#DIV/0!		#DIV/0!															#DIV/0!	#DIV/0!	#DIV/0!	#DIV/0!	#DIV/0!	#DIV/0!	#DIV/0!	#DIV/0!	#DIV/0!	#DIV/0!	#DIV/0!	#DIV/0!	#DIV/0!	0	0	0	0	0	0	#DIV/0!	#DIV/0!	#DIV/0!	#DIV/0!	#DIV/0!	#DIV/0!	#DIV/0!	0
						#DIV/0!		#DIV/0!															#DIV/0!	#DIV/0!	#DIV/0!	#DIV/0!	#DIV/0!	#DIV/0!	#DIV/0!	#DIV/0!	#DIV/0!	#DIV/0!	#DIV/0!	#DIV/0!	#DIV/0!	0	0	0	0	0	0	#DIV/0!	#DIV/0!	#DIV/0!	#DIV/0!	#DIV/0!	#DIV/0!	#DIV/0!	0
						#DIV/0!		#DIV/0!															#DIV/0!	#DIV/0!	#DIV/0!	#DIV/0!	#DIV/0!	#DIV/0!	#DIV/0!	#DIV/0!	#DIV/0!	#DIV/0!	#DIV/0!	#DIV/0!	#DIV/0!	0	0	0	0	0	0	#DIV/0!	#DIV/0!	#DIV/0!	#DIV/0!	#DIV/0!	#DIV/0!	#DIV/0!	0
						#DIV/0!		#DIV/0!															#DIV/0!	#DIV/0!	#DIV/0!	#DIV/0!	#DIV/0!	#DIV/0!	#DIV/0!	#DIV/0!	#DIV/0!	#DIV/0!	#DIV/0!	#DIV/0!	#DIV/0!	0	0	0	0	0	0	#DIV/0!	#DIV/0!	#DIV/0!	#DIV/0!	#DIV/0!	#DIV/0!	#DIV/0!	0
						#DIV/0!		#DIV/0!															#DIV/0!	#DIV/0!	#DIV/0!	#DIV/0!	#DIV/0!	#DIV/0!	#DIV/0!	#DIV/0!	#DIV/0!	#DIV/0!	#DIV/0!	#DIV/0!	#DIV/0!	0	0	0	0	0	0	#DIV/0!	#DIV/0!	#DIV/0!	#DIV/0!	#DIV/0!	#DIV/0!	#DIV/0!	0
						#DIV/0!		#DIV/0!															#DIV/0!	#DIV/0!	#DIV/0!	#DIV/0!	#DIV/0!	#DIV/0!	#DIV/0!	#DIV/0!	#DIV/0!	#DIV/0!	#DIV/0!	#DIV/0!	#DIV/0!	0	0	0	0	0	0	#DIV/0!	#DIV/0!	#DIV/0!	#DIV/0!	#DIV/0!	#DIV/0!	#DIV/0!	0
						#DIV/0!		#DIV/0!															#DIV/0!	#DIV/0!	#DIV/0!	#DIV/0!	#DIV/0!	#DIV/0!	#DIV/0!	#DIV/0!	#DIV/0!	#DIV/0!	#DIV/0!	#DIV/0!	#DIV/0!	0	0	0	0	0	0	#DIV/0!	#DIV/0!	#DIV/0!	#DIV/0!	#DIV/0!	#DIV/0!	#DIV/0!	0
						#DIV/0!		#DIV/0!															#DIV/0!	#DIV/0!	#DIV/0!	#DIV/0!	#DIV/0!	#DIV/0!	#DIV/0!	#DIV/0!	#DIV/0!	#DIV/0!	#DIV/0!	#DIV/0!	#DIV/0!	0	0	0	0	0	0	#DIV/0!	#DIV/0!	#DIV/0!	#DIV/0!	#DIV/0!	#DIV/0!	#DIV/0!	0
						#DIV/0!		#DIV/0!															#DIV/0!	#DIV/0!	#DIV/0!	#DIV/0!	#DIV/0!	#DIV/0!	#DIV/0!	#DIV/0!	#DIV/0!	#DIV/0!	#DIV/0!	#DIV/0!	#DIV/0!	0	0	0	0	0	0	#DIV/0!	#DIV/0!	#DIV/0!	#DIV/0!	#DIV/0!	#DIV/0!	#DIV/0!	0
						#DIV/0!		#DIV/0!															#DIV/0!	#DIV/0!	#DIV/0!	#DIV/0!	#DIV/0!	#DIV/0!	#DIV/0!	#DIV/0!	#DIV/0!	#DIV/0!	#DIV/0!	#DIV/0!	#DIV/0!	0	0	0	0	0	0	#DIV/0!	#DIV/0!	#DIV/0!	#DIV/0!	#DIV/0!	#DIV/0!	#DIV/0!	0
						#DIV/0!		#DIV/0!															#DIV/0!	#DIV/0!	#DIV/0!	#DIV/0!	#DIV/0!	#DIV/0!	#DIV/0!	#DIV/0!	#DIV/0!	#DIV/0!	#DIV/0!	#DIV/0!	#DIV/0!	0	0	0	0	0	0	#DIV/0!	#DIV/0!	#DIV/0!	#DIV/0!	#DIV/0!	#DIV/0!	#DIV/0!	0
						#DIV/0!		#DIV/0!															#DIV/0!	#DIV/0!	#DIV/0!	#DIV/0!	#DIV/0!	#DIV/0!	#DIV/0!	#DIV/0!	#DIV/0!	#DIV/0!	#DIV/0!	#DIV/0!	#DIV/0!	0	0	0	0	0	0	#DIV/0!	#DIV/0!	#DIV/0!	#DIV/0!	#DIV/0!	#DIV/0!	#DIV/0!	0
						#DIV/0!		#DIV/0!															#DIV/0!	#DIV/0!	#DIV/0!	#DIV/0!	#DIV/0!	#DIV/0!	#DIV/0!	#DIV/0!	#DIV/0!	#DIV/0!	#DIV/0!	#DIV/0!	#DIV/0!	0	0	0	0	0	0	#DIV/0!	#DIV/0!	#DIV/0!	#DIV/0!	#DIV/0!	#DIV/0!	#DIV/0!	0
						#DIV/0!		#DIV/0!															#DIV/0!	#DIV/0!	#DIV/0!	#DIV/0!	#DIV/0!	#DIV/0!	#DIV/0!	#DIV/0!	#DIV/0!	#DIV/0!	#DIV/0!	#DIV/0!	#DIV/0!	0	0	0	0	0	0	#DIV/0!	#DIV/0!	#DIV/0!	#DIV/0!	#DIV/0!	#DIV/0!	#DIV/0!	0
						#DIV/0!		#DIV/0!															#DIV/0!	#DIV/0!	#DIV/0!	#DIV/0!	#DIV/0!	#DIV/0!	#DIV/0!	#DIV/0!	#DIV/0!	#DIV/0!	#DIV/0!	#DIV/0!	#DIV/0!	0	0	0	0	0	0	#DIV/0!	#DIV/0!	#DIV/0!	#DIV/0!	#DIV/0!	#DIV/0!	#DIV/0!	0
						#DIV/0!		#DIV/0!															#DIV/0!	#DIV/0!	#DIV/0!	#DIV/0!	#DIV/0!	#DIV/0!	#DIV/0!	#DIV/0!	#DIV/0!	#DIV/0!	#DIV/0!	#DIV/0!	#DIV/0!	0	0	0	0	0	0	#DIV/0!	#DIV/0!	#DIV/0!	#DIV/0!	#DIV/0!	#DIV/0!	#DIV/0!	0
						#DIV/0!		#DIV/0!															#DIV/0!	#DIV/0!	#DIV/0!	#DIV/0!	#DIV/0!	#DIV/0!	#DIV/0!	#DIV/0!	#DIV/0!	#DIV/0!	#DIV/0!	#DIV/0!	#DIV/0!	0	0	0	0	0	0	#DIV/0!	#DIV/0!	#DIV/0!	#DIV/0!	#DIV/0!	#DIV/0!	#DIV/0!	0
						#DIV/0!		#DIV/0!															#DIV/0!	#DIV/0!	#DIV/0!	#DIV/0!	#DIV/0!	#DIV/0!	#DIV/0!	#DIV/0!	#DIV/0!	#DIV/0!	#DIV/0!	#DIV/0!	#DIV/0!	0	0	0	0	0	0	#DIV/0!	#DIV/0!	#DIV/0!	#DIV/0!	#DIV/0!	#DIV/0!	#DIV/0!	0
						#DIV/0!		#DIV/0!															#DIV/0!	#DIV/0!	#DIV/0!	#DIV/0!	#DIV/0!	#DIV/0!	#DIV/0!	#DIV/0!	#DIV/0!	#DIV/0!	#DIV/0!	#DIV/0!	#DIV/0!	0	0	0	0	0	0	#DIV/0!	#DIV/0!	#DIV/0!	#DIV/0!	#DIV/0!	#DIV/0!	#DIV/0!	0
						#DIV/0!		#DIV/0!															#DIV/0!	#DIV/0!	#DIV/0!	#DIV/0!	#DIV/0!	#DIV/0!	#DIV/0!	#DIV/0!	#DIV/0!	#DIV/0!	#DIV/0!	#DIV/0!	#DIV/0!	0	0	0	0	0	0	#DIV/0!	#DIV/0!	#DIV/0!	#DIV/0!	#DIV/0!	#DIV/0!	#DIV/0!	0
						#DIV/0!		#DIV/0!															#DIV/0!	#DIV/0!	#DIV/0!	#DIV/0!	#DIV/0!	#DIV/0!	#DIV/0!	#DIV/0!	#DIV/0!	#DIV/0!	#DIV/0!	#DIV/0!	#DIV/0!	0	0	0	0	0	0	#DIV/0!	#DIV/0!	#DIV/0!	#DIV/0!	#DIV/0!	#DIV/0!	#DIV/0!	0
						#DIV/0!		#DIV/0!															#DIV/0!	#DIV/0!	#DIV/0!	#DIV/0!	#DIV/0!	#DIV/0!	#DIV/0!	#DIV/0!	#DIV/0!	#DIV/0!	#DIV/0!	#DIV/0!	#DIV/0!	0	0	0	0	0	0	#DIV/0!	#DIV/0!	#DIV/0!	#DIV/0!	#DIV/0!	#DIV/0!	#DIV/0!	0
						#DIV/0!		#DIV/0!															#DIV/0!	#DIV/0!	#DIV/0!	#DIV/0!	#DIV/0!	#DIV/0!	#DIV/0!	#DIV/0!	#DIV/0!	#DIV/0!	#DIV/0!	#DIV/0!	#DIV/0!	0	0	0	0	0	0	#DIV/0!	#DIV/0!	#DIV/0!	#DIV/0!	#DIV/0!	#DIV/0!	#DIV/0!	0
						#DIV/0!		#DIV/0!															#DIV/0!	#DIV/0!	#DIV/0!	#DIV/0!	#DIV/0!	#DIV/0!	#DIV/0!	#DIV/0!	#DIV/0!	#DIV/0!	#DIV/0!	#DIV/0!	#DIV/0!	0	0	0	0	0	0	#DIV/0!	#DIV/0!	#DIV/0!	#DIV/0!	#DIV/0!	#DIV/0!	#DIV/0!	0
						#DIV/0!		#DIV/0!															#DIV/0!	#DIV/0!	#DIV/0!	#DIV/0!	#DIV/0!	#DIV/0!	#DIV/0!	#DIV/0!	#DIV/0!	#DIV/0!	#DIV/0!	#DIV/0!	#DIV/0!	0	0	0	0	0	0	#DIV/0!	#DIV/0!	#DIV/0!	#DIV/0!	#DIV/0!	#DIV/0!	#DIV/0!	0
						#DIV/0!		#DIV/0!															#DIV/0!	#DIV/0!	#DIV/0!	#DIV/0!	#DIV/0!	#DIV/0!	#DIV/0!	#DIV/0!	#DIV/0!	#DIV/0!	#DIV/0!	#DIV/0!	#DIV/0!	0	0	0	0	0	0	#DIV/0!	#DIV/0!	#DIV/0!	#DIV/0!	#DIV/0!	#DIV/0!	#DIV/0!	0
						#DIV/0!		#DIV/0!															#DIV/0!	#DIV/0!	#DIV/0!	#DIV/0!	#DIV/0!	#DIV/0!	#DIV/0!	#DIV/0!	#DIV/0!	#DIV/0!	#DIV/0!	#DIV/0!	#DIV/0!	0	0	0	0	0	0	#DIV/0!	#DIV/0!	#DIV/0!	#DIV/0!	#DIV/0!	#DIV/0!	#DIV/0!	0
						#DIV/0!		#DIV/0!															#DIV/0!	#DIV/0!	#DIV/0!	#DIV/0!	#DIV/0!	#DIV/0!	#DIV/0!	#DIV/0!	#DIV/0!	#DIV/0!	#DIV/0!	#DIV/0!	#DIV/0!	0	0	0	0	0	0	#DIV/0!	#DIV/0!	#DIV/0!	#DIV/0!	#DIV/0!	#DIV/0!	#DIV/0!	0
						#DIV/0!		#DIV/0!															#DIV/0!	#DIV/0!	#DIV/0!	#DIV/0!	#DIV/0!	#DIV/0!	#DIV/0!	#DIV/0!	#DIV/0!	#DIV/0!	#DIV/0!	#DIV/0!	#DIV/0!	0	0	0	0	0	0	#DIV/0!	#DIV/0!	#DIV/0!	#DIV/0!	#DIV/0!	#DIV/0!	#DIV/0!	0
						#DIV/0!		#DIV/0!															#DIV/0!	#DIV/0!	#DIV/0!	#DIV/0!	#DIV/0!	#DIV/0!	#DIV/0!	#DIV/0!	#DIV/0!	#DIV/0!	#DIV/0!	#DIV/0!	#DIV/0!	0	0	0	0	0	0	#DIV/0!	#DIV/0!	#DIV/0!	#DIV/0!	#DIV/0!	#DIV/0!	#DIV/0!	0
						#DIV/0!		#DIV/0!															#DIV/0!	#DIV/0!	#DIV/0!	#DIV/0!	#DIV/0!	#DIV/0!	#DIV/0!	#DIV/0!	#DIV/0!	#DIV/0!	#DIV/0!	#DIV/0!	#DIV/0!	0	0	0	0	0	0	#DIV/0!	#DIV/0!	#DIV/0!	#DIV/0!	#DIV/0!	#DIV/0!	#DIV/0!	0
						#DIV/0!		#DIV/0!															#DIV/0!	#DIV/0!	#DIV/0!	#DIV/0!	#DIV/0!	#DIV/0!	#DIV/0!	#DIV/0!	#DIV/0!	#DIV/0!	#DIV/0!	#DIV/0!	#DIV/0!	0	0	0	0	0	0	#DIV/0!	#DIV/0!	#DIV/0!	#DIV/0!	#DIV/0!	#DIV/0!	#DIV/0!	0
						#DIV/0!		#DIV/0!															#DIV/0!	#DIV/0!	#DIV/0!	#DIV/0!	#DIV/0!	#DIV/0!	#DIV/0!	#DIV/0!	#DIV/0!	#DIV/0!	#DIV/0!	#DIV/0!	#DIV/0!	0	0	0	0	0	0	#DIV/0!	#DIV/0!	#DIV/0!	#DIV/0!	#DIV/0!	#DIV/0!	#DIV/0!	0
						#DIV/0!		#DIV/0!															#DIV/0!	#DIV/0!	#DIV/0!	#DIV/0!	#DIV/0!	#DIV/0!	#DIV/0!	#DIV/0!	#DIV/0!	#DIV/0!	#DIV/0!	#DIV/0!	#DIV/0!	0	0	0	0	0	0	#DIV/0!	#DIV/0!	#DIV/0!	#DIV/0!	#DIV/0!	#DIV/0!	#DIV/0!	0
						#DIV/0!		#DIV/0!															#DIV/0!	#DIV/0!	#DIV/0!	#DIV/0!	#DIV/0!	#DIV/0!	#DIV/0!	#DIV/0!	#DIV/0!	#DIV/0!	#DIV/0!	#DIV/0!	#DIV/0!	0	0	0	0	0	0	#DIV/0!	#DIV/0!	#DIV/0!	#DIV/0!	#DIV/0!	#DIV/0!	#DIV/0!	0
						#DIV/0!		#DIV/0!															#DIV/0!	#DIV/0!	#DIV/0!	#DIV/0!	#DIV/0!	#DIV/0!	#DIV/0!	#DIV/0!	#DIV/0!	#DIV/0!	#DIV/0!	#DIV/0!	#DIV/0!	0	0	0	0	0	0	#DIV/0!	#DIV/0!	#DIV/0!	#DIV/0!	#DIV/0!	#DIV/0!	#DIV/0!	0
						#DIV/0!		#DIV/0!															#DIV/0!	#DIV/0!	#DIV/0!	#DIV/0!	#DIV/0!	#DIV/0!	#DIV/0!	#DIV/0!	#DIV/0!	#DIV/0!	#DIV/0!	#DIV/0!	#DIV/0!	0	0	0	0	0	0	#DIV/0!	#DIV/0!	#DIV/0!	#DIV/0!	#DIV/0!	#DIV/0!	#DIV/0!	0
						#DIV/0!		#DIV/0!															#DIV/0!	#DIV/0!	#DIV/0!	#DIV/0!	#DIV/0!	#DIV/0!	#DIV/0!	#DIV/0!	#DIV/0!	#DIV/0!	#DIV/0!	#DIV/0!	#DIV/0!	0	0	0	0	0	0	#DIV/0!	#DIV/0!	#DIV/0!	#DIV/0!	#DIV/0!	#DIV/0!	#DIV/0!	0
						#DIV/0!		#DIV/0!															#DIV/0!	#DIV/0!	#DIV/0!	#DIV/0!	#DIV/0!	#DIV/0!	#DIV/0!	#DIV/0!	#DIV/0!	#DIV/0!	#DIV/0!	#DIV/0!	#DIV/0!	0	0	0	0	0	0	#DIV/0!	#DIV/0!	#DIV/0!	#DIV/0!	#DIV/0!	#DIV/0!	#DIV/0!	0
						#DIV/0!		#DIV/0!															#DIV/0!	#DIV/0!	#DIV/0!	#DIV/0!	#DIV/0!	#DIV/0!	#DIV/0!	#DIV/0!	#DIV/0!	#DIV/0!	#DIV/0!	#DIV/0!	#DIV/0!	0	0	0	0	0	0	#DIV/0!	#DIV/0!	#DIV/0!	#DIV/0!	#DIV/0!	#DIV/0!	#DIV/0!	0
						#DIV/0!		#DIV/0!															#DIV/0!	#DIV/0!	#DIV/0!	#DIV/0!	#DIV/0!	#DIV/0!	#DIV/0!	#DIV/0!	#DIV/0!	#DIV/0!	#DIV/0!	#DIV/0!	#DIV/0!	0	0	0	0	0	0	#DIV/0!	#DIV/0!	#DIV/0!	#DIV/0!	#DIV/0!	#DIV/0!	#DIV/0!	0
						#DIV/0!		#DIV/0!															#DIV/0!	#DIV/0!	#DIV/0!	#DIV/0!	#DIV/0!	#DIV/0!	#DIV/0!	#DIV/0!	#DIV/0!	#DIV/0!	#DIV/0!	#DIV/0!	#DIV/0!	0	0	0	0	0	0	#DIV/0!	#DIV/0!	#DIV/0!	#DIV/0!	#DIV/0!	#DIV/0!	#DIV/0!	0
						#DIV/0!		#DIV/0!															#DIV/0!	#DIV/0!	#DIV/0!	#DIV/0!	#DIV/0!	#DIV/0!	#DIV/0!	#DIV/0!	#DIV/0!	#DIV/0!	#DIV/0!	#DIV/0!	#DIV/0!	0	0	0	0	0	0	#DIV/0!	#DIV/0!	#DIV/0!	#DIV/0!	#DIV/0!	#DIV/0!	#DIV/0!	0
						#DIV/0!		#DIV/0!															#DIV/0!	#DIV/0!	#DIV/0!	#DIV/0!	#DIV/0!	#DIV/0!	#DIV/0!	#DIV/0!	#DIV/0!	#DIV/0!	#DIV/0!	#DIV/0!	#DIV/0!	0	0	0	0	0	0	#DIV/0!	#DIV/0!	#DIV/0!	#DIV/0!	#DIV/0!	#DIV/0!	#DIV/0!	0
						#DIV/0!		#DIV/0!															#DIV/0!	#DIV/0!	#DIV/0!	#DIV/0!	#DIV/0!	#DIV/0!	#DIV/0!	#DIV/0!	#DIV/0!	#DIV/0!	#DIV/0!	#DIV/0!	#DIV/0!	0	0	0	0	0	0	#DIV/0!	#DIV/0!	#DIV/0!	#DIV/0!	#DIV/0!	#DIV/0!	#DIV/0!	0
						#DIV/0!		#DIV/0!															#DIV/0!	#DIV/0!	#DIV/0!	#DIV/0!	#DIV/0!	#DIV/0!	#DIV/0!	#DIV/0!	#DIV/0!	#DIV/0!	#DIV/0!	#DIV/0!	#DIV/0!	0	0	0	0	0	0	#DIV/0!	#DIV/0!	#DIV/0!	#DIV/0!	#DIV/0!	#DIV/0!	#DIV/0!	0
						#DIV/0!		#DIV/0!															#DIV/0!	#DIV/0!	#DIV/0!	#DIV/0!	#DIV/0!	#DIV/0!	#DIV/0!	#DIV/0!	#DIV/0!	#DIV/0!	#DIV/0!	#DIV/0!	#DIV/0!	0	0	0	0	0	0	#DIV/0!	#DIV/0!	#DIV/0!	#DIV/0!	#DIV/0!	#DIV/0!	#DIV/0!	0
						#DIV/0!		#DIV/0!															#DIV/0!	#DIV/0!	#DIV/0!	#DIV/0!	#DIV/0!	#DIV/0!	#DIV/0!	#DIV/0!	#DIV/0!	#DIV/0!	#DIV/0!	#DIV/0!	#DIV/0!	0	0	0	0	0	0	#DIV/0!	#DIV/0!	#DIV/0!	#DIV/0!	#DIV/0!	#DIV/0!	#DIV/0!	0
						#DIV/0!		#DIV/0!															#DIV/0!	#DIV/0!	#DIV/0!	#DIV/0!	#DIV/0!	#DIV/0!	#DIV/0!	#DIV/0!	#DIV/0!	#DIV/0!	#DIV/0!	#DIV/0!	#DIV/0!	0	0	0	0	0	0	#DIV/0!	#DIV/0!	#DIV/0!	#DIV/0!	#DIV/0!	#DIV/0!	#DIV/0!	0
						#DIV/0!		#DIV/0!															#DIV/0!	#DIV/0!	#DIV/0!	#DIV/0!	#DIV/0!	#DIV/0!	#DIV/0!	#DIV/0!	#DIV/0!	#DIV/0!	#DIV/0!	#DIV/0!	#DIV/0!	0	0	0	0	0	0	#DIV/0!	#DIV/0!	#DIV/0!	#DIV/0!	#DIV/0!	#DIV/0!	#DIV/0!	0
						#DIV/0!		#DIV/0!															#DIV/0!	#DIV/0!	#DIV/0!	#DIV/0!	#DIV/0!	#DIV/0!	#DIV/0!	#DIV/0!	#DIV/0!	#DIV/0!	#DIV/0!	#DIV/0!	#DIV/0!	0	0	0	0	0	0	#DIV/0!	#DIV/0!	#DIV/0!	#DIV/0!	#DIV/0!	#DIV/0!	#DIV/0!	0
						#DIV/0!		#DIV/0!															#DIV/0!	#DIV/0!	#DIV/0!	#DIV/0!	#DIV/0!	#DIV/0!	#DIV/0!	#DIV/0!	#DIV/0!	#DIV/0!	#DIV/0!	#DIV/0!	#DIV/0!	0	0	0	0	0	0	#DIV/0!	#DIV/0!	#DIV/0!	#DIV/0!	#DIV/0!	#DIV/0!	#DIV/0!	0
						#DIV/0!		#DIV/0!															#DIV/0!	#DIV/0!	#DIV/0!	#DIV/0!	#DIV/0!	#DIV/0!	#DIV/0!	#DIV/0!	#DIV/0!	#DIV/0!	#DIV/0!	#DIV/0!	#DIV/0!	0	0	0	0	0	0	#DIV/0!	#DIV/0!	#DIV/0!	#DIV/0!	#DIV/0!	#DIV/0!	#DIV/0!	0
						#DIV/0!		#DIV/0!															#DIV/0!	#DIV/0!	#DIV/0!	#DIV/0!	#DIV/0!	#DIV/0!	#DIV/0!	#DIV/0!	#DIV/0!	#DIV/0!	#DIV/0!	#DIV/0!	#DIV/0!	0	0	0	0	0	0	#DIV/0!	#DIV/0!	#DIV/0!	#DIV/0!	#DIV/0!	#DIV/0!	#DIV/0!	0
						#DIV/0!		#DIV/0!															#DIV/0!	#DIV/0!	#DIV/0!	#DIV/0!	#DIV/0!	#DIV/0!	#DIV/0!	#DIV/0!	#DIV/0!	#DIV/0!	#DIV/0!	#DIV/0!	#DIV/0!	0	0	0	0	0	0	#DIV/0!	#DIV/0!	#DIV/0!	#DIV/0!	#DIV/0!	#DIV/0!	#DIV/0!	0
						#DIV/0!		#DIV/0!															#DIV/0!	#DIV/0!	#DIV/0!	#DIV/0!	#DIV/0!	#DIV/0!	#DIV/0!	#DIV/0!	#DIV/0!	#DIV/0!	#DIV/0!	#DIV/0!	#DIV/0!	0	0	0	0	0	0	#DIV/0!	#DIV/0!	#DIV/0!	#DIV/0!	#DIV/0!	#DIV/0!	#DIV/0!	0
						#DIV/0!		#DIV/0!															#DIV/0!	#DIV/0!	#DIV/0!	#DIV/0!	#DIV/0!	#DIV/0!	#DIV/0!	#DIV/0!	#DIV/0!	#DIV/0!	#DIV/0!	#DIV/0!	#DIV/0!	0	0	0	0	0	0	#DIV/0!	#DIV/0!	#DIV/0!	#DIV/0!	#DIV/0!	#DIV/0!	#DIV/0!	0
						#DIV/0!		#DIV/0!															#DIV/0!	#DIV/0!	#DIV/0!	#DIV/0!	#DIV/0!	#DIV/0!	#DIV/0!	#DIV/0!	#DIV/0!	#DIV/0!	#DIV/0!	#DIV/0!	#DIV/0!	0	0	0	0	0	0	#DIV/0!	#DIV/0!	#DIV/0!	#DIV/0!	#DIV/0!	#DIV/0!	#DIV/0!	0
						#DIV/0!		#DIV/0!															#DIV/0!	#DIV/0!	#DIV/0!	#DIV/0!	#DIV/0!	#DIV/0!	#DIV/0!	#DIV/0!	#DIV/0!	#DIV/0!	#DIV/0!	#DIV/0!	#DIV/0!	0	0	0	0	0	0	#DIV/0!	#DIV/0!	#DIV/0!	#DIV/0!	#DIV/0!	#DIV/0!	#DIV/0!	0
						#DIV/0!		#DIV/0!															#DIV/0!	#DIV/0!	#DIV/0!	#DIV/0!	#DIV/0!	#DIV/0!	#DIV/0!	#DIV/0!	#DIV/0!	#DIV/0!	#DIV/0!	#DIV/0!	#DIV/0!	0	0	0	0	0	0	#DIV/0!	#DIV/0!	#DIV/0!	#DIV/0!	#DIV/0!	#DIV/0!	#DIV/0!	0
						#DIV/0!		#DIV/0!															#DIV/0!	#DIV/0!	#DIV/0!	#DIV/0!	#DIV/0!	#DIV/0!	#DIV/0!	#DIV/0!	#DIV/0!	#DIV/0!	#DIV/0!	#DIV/0!	#DIV/0!	0	0	0	0	0	0	#DIV/0!	#DIV/0!	#DIV/0!	#DIV/0!	#DIV/0!	#DIV/0!	#DIV/0!	0
						#DIV/0!		#DIV/0!															#DIV/0!	#DIV/0!	#DIV/0!	#DIV/0!	#DIV/0!	#DIV/0!	#DIV/0!	#DIV/0!	#DIV/0!	#DIV/0!	#DIV/0!	#DIV/0!	#DIV/0!	0	0	0	0	0	0	#DIV/0!	#DIV/0!	#DIV/0!	#DIV/0!	#DIV/0!	#DIV/0!	#DIV/0!	0
						#DIV/0!		#DIV/0!															#DIV/0!	#DIV/0!	#DIV/0!	#DIV/0!	#DIV/0!	#DIV/0!	#DIV/0!	#DIV/0!	#DIV/0!	#DIV/0!	#DIV/0!	#DIV/0!	#DIV/0!	0	0	0	0	0	0	#DIV/0!	#DIV/0!	#DIV/0!	#DIV/0!	#DIV/0!	#DIV/0!	#DIV/0!	0
						#DIV/0!		#DIV/0!															#DIV/0!	#DIV/0!	#DIV/0!	#DIV/0!	#DIV/0!	#DIV/0!	#DIV/0!	#DIV/0!	#DIV/0!	#DIV/0!	#DIV/0!	#DIV/0!	#DIV/0!	0	0	0	0	0	0	#DIV/0!	#DIV/0!	#DIV/0!	#DIV/0!	#DIV/0!	#DIV/0!	#DIV/0!	0
						#DIV/0!		#DIV/0!															#DIV/0!	#DIV/0!	#DIV/0!	#DIV/0!	#DIV/0!	#DIV/0!	#DIV/0!	#DIV/0!	#DIV/0!	#DIV/0!	#DIV/0!	#DIV/0!	#DIV/0!	0	0	0	0	0	0	#DIV/0!	#DIV/0!	#DIV/0!	#DIV/0!	#DIV/0!	#DIV/0!	#DIV/0!	0
						#DIV/0!		#DIV/0!															#DIV/0!	#DIV/0!	#DIV/0!	#DIV/0!	#DIV/0!	#DIV/0!	#DIV/0!	#DIV/0!	#DIV/0!	#DIV/0!	#DIV/0!	#DIV/0!	#DIV/0!	0	0	0	0	0	0	#DIV/0!	#DIV/0!	#DIV/0!	#DIV/0!	#DIV/0!	#DIV/0!	#DIV/0!	0
						#DIV/0!		#DIV/0!															#DIV/0!	#DIV/0!	#DIV/0!	#DIV/0!	#DIV/0!	#DIV/0!	#DIV/0!	#DIV/0!	#DIV/0!	#DIV/0!	#DIV/0!	#DIV/0!	#DIV/0!	0	0	0	0	0	0	#DIV/0!	#DIV/0!	#DIV/0!	#DIV/0!	#DIV/0!	#DIV/0!	#DIV/0!	0
						#DIV/0!		#DIV/0!															#DIV/0!	#DIV/0!	#DIV/0!	#DIV/0!	#DIV/0!	#DIV/0!	#DIV/0!	#DIV/0!	#DIV/0!	#DIV/0!	#DIV/0!	#DIV/0!	#DIV/0!	0	0	0	0	0	0	#DIV/0!	#DIV/0!	#DIV/0!	#DIV/0!	#DIV/0!	#DIV/0!	#DIV/0!	0
						#DIV/0!		#DIV/0!															#DIV/0!	#DIV/0!	#DIV/0!	#DIV/0!	#DIV/0!	#DIV/0!	#DIV/0!	#DIV/0!	#DIV/0!	#DIV/0!	#DIV/0!	#DIV/0!	#DIV/0!	0	0	0	0	0	0	#DIV/0!	#DIV/0!	#DIV/0!	#DIV/0!	#DIV/0!	#DIV/0!	#DIV/0!	0
						#DIV/0!		#DIV/0!															#DIV/0!	#DIV/0!	#DIV/0!	#DIV/0!	#DIV/0!	#DIV/0!	#DIV/0!	#DIV/0!	#DIV/0!	#DIV/0!	#DIV/0!	#DIV/0!	#DIV/0!	0	0	0	0	0	0	#DIV/0!	#DIV/0!	#DIV/0!	#DIV/0!	#DIV/0!	#DIV/0!	#DIV/0!	0
						#DIV/0!		#DIV/0!															#DIV/0!	#DIV/0!	#DIV/0!	#DIV/0!	#DIV/0!	#DIV/0!	#DIV/0!	#DIV/0!	#DIV/0!	#DIV/0!	#DIV/0!	#DIV/0!	#DIV/0!	0	0	0	0	0	0	#DIV/0!	#DIV/0!	#DIV/0!	#DIV/0!	#DIV/0!	#DIV/0!	#DIV/0!	0
						#DIV/0!		#DIV/0!															#DIV/0!	#DIV/0!	#DIV/0!	#DIV/0!	#DIV/0!	#DIV/0!	#DIV/0!	#DIV/0!	#DIV/0!	#DIV/0!	#DIV/0!	#DIV/0!	#DIV/0!	0	0	0	0	0	0	#DIV/0!	#DIV/0!	#DIV/0!	#DIV/0!	#DIV/0!	#DIV/0!	#DIV/0!	0
						#DIV/0!		#DIV/0!															#DIV/0!	#DIV/0!	#DIV/0!	#DIV/0!	#DIV/0!	#DIV/0!	#DIV/0!	#DIV/0!	#DIV/0!	#DIV/0!	#DIV/0!	#DIV/0!	#DIV/0!	0	0	0	0	0	0	#DIV/0!	#DIV/0!	#DIV/0!	#DIV/0!	#DIV/0!	#DIV/0!	#DIV/0!	0
						#DIV/0!		#DIV/0!															#DIV/0!	#DIV/0!	#DIV/0!	#DIV/0!	#DIV/0!	#DIV/0!	#DIV/0!	#DIV/0!	#DIV/0!	#DIV/0!	#DIV/0!	#DIV/0!	#DIV/0!	0	0	0	0	0	0	#DIV/0!	#DIV/0!	#DIV/0!	#DIV/0!	#DIV/0!	#DIV/0!	#DIV/0!	0
						#DIV/0!		#DIV/0!															#DIV/0!	#DIV/0!	#DIV/0!	#DIV/0!	#DIV/0!	#DIV/0!	#DIV/0!	#DIV/0!	#DIV/0!	#DIV/0!	#DIV/0!	#DIV/0!	#DIV/0!	0	0	0	0	0	0	#DIV/0!	#DIV/0!	#DIV/0!	#DIV/0!	#DIV/0!	#DIV/0!	#DIV/0!	0
						#DIV/0!		#DIV/0!															#DIV/0!	#DIV/0!	#DIV/0!	#DIV/0!	#DIV/0!	#DIV/0!	#DIV/0!	#DIV/0!	#DIV/0!	#DIV/0!	#DIV/0!	#DIV/0!	#DIV/0!	0	0	0	0	0	0	#DIV/0!	#DIV/0!	#DIV/0!	#DIV/0!	#DIV/0!	#DIV/0!	#DIV/0!	0
						#DIV/0!		#DIV/0!															#DIV/0!	#DIV/0!	#DIV/0!	#DIV/0!	#DIV/0!	#DIV/0!	#DIV/0!	#DIV/0!	#DIV/0!	#DIV/0!	#DIV/0!	#DIV/0!	#DIV/0!	0	0	0	0	0	0	#DIV/0!	#DIV/0!	#DIV/0!	#DIV/0!	#DIV/0!	#DIV/0!	#DIV/0!	0
						#DIV/0!		#DIV/0!															#DIV/0!	#DIV/0!	#DIV/0!	#DIV/0!	#DIV/0!	#DIV/0!	#DIV/0!	#DIV/0!	#DIV/0!	#DIV/0!	#DIV/0!	#DIV/0!	#DIV/0!	0	0	0	0	0	0	#DIV/0!	#DIV/0!	#DIV/0!	#DIV/0!	#DIV/0!	#DIV/0!	#DIV/0!	0
						#DIV/0!		#DIV/0!															#DIV/0!	#DIV/0!	#DIV/0!	#DIV/0!	#DIV/0!	#DIV/0!	#DIV/0!	#DIV/0!	#DIV/0!	#DIV/0!	#DIV/0!	#DIV/0!	#DIV/0!	0	0	0	0	0	0	#DIV/0!	#DIV/0!	#DIV/0!	#DIV/0!	#DIV/0!	#DIV/0!	#DIV/0!	0
						#DIV/0!		#DIV/0!															#DIV/0!	#DIV/0!	#DIV/0!	#DIV/0!	#DIV/0!	#DIV/0!	#DIV/0!	#DIV/0!	#DIV/0!	#DIV/0!	#DIV/0!	#DIV/0!	#DIV/0!	0	0	0	0	0	0	#DIV/0!	#DIV/0!	#DIV/0!	#DIV/0!	#DIV/0!	#DIV/0!	#DIV/0!	0
						#DIV/0!		#DIV/0!															#DIV/0!	#DIV/0!	#DIV/0!	#DIV/0!	#DIV/0!	#DIV/0!	#DIV/0!	#DIV/0!	#DIV/0!	#DIV/0!	#DIV/0!	#DIV/0!	#DIV/0!	0	0	0	0	0	0	#DIV/0!	#DIV/0!	#DIV/0!	#DIV/0!	#DIV/0!	#DIV/0!	#DIV/0!	0
						#DIV/0!		#DIV/0!															#DIV/0!	#DIV/0!	#DIV/0!	#DIV/0!	#DIV/0!	#DIV/0!	#DIV/0!	#DIV/0!	#DIV/0!	#DIV/0!	#DIV/0!	#DIV/0!	#DIV/0!	0	0	0	0	0	0	#DIV/0!	#DIV/0!	#DIV/0!	#DIV/0!	#DIV/0!	#DIV/0!	#DIV/0!	0
						#DIV/0!		#DIV/0!															#DIV/0!	#DIV/0!	#DIV/0!	#DIV/0!	#DIV/0!	#DIV/0!	#DIV/0!	#DIV/0!	#DIV/0!	#DIV/0!	#DIV/0!	#DIV/0!	#DIV/0!	0	0	0	0	0	0	#DIV/0!	#DIV/0!	#DIV/0!	#DIV/0!	#DIV/0!	#DIV/0!	#DIV/0!	0
						#DIV/0!		#DIV/0!															#DIV/0!	#DIV/0!	#DIV/0!	#DIV/0!	#DIV/0!	#DIV/0!	#DIV/0!	#DIV/0!	#DIV/0!	#DIV/0!	#DIV/0!	#DIV/0!	#DIV/0!	0	0	0	0	0	0	#DIV/0!	#DIV/0!	#DIV/0!	#DIV/0!	#DIV/0!	#DIV/0!	#DIV/0!	0
						#DIV/0!		#DIV/0!															#DIV/0!	#DIV/0!	#DIV/0!	#DIV/0!	#DIV/0!	#DIV/0!	#DIV/0!	#DIV/0!	#DIV/0!	#DIV/0!	#DIV/0!	#DIV/0!	#DIV/0!	0	0	0	0	0	0	#DIV/0!	#DIV/0!	#DIV/0!	#DIV/0!	#DIV/0!	#DIV/0!	#DIV/0!	0
						#DIV/0!		#DIV/0!															#DIV/0!	#DIV/0!	#DIV/0!	#DIV/0!	#DIV/0!	#DIV/0!	#DIV/0!	#DIV/0!	#DIV/0!	#DIV/0!	#DIV/0!	#DIV/0!	#DIV/0!	0	0	0	0	0	0	#DIV/0!	#DIV/0!	#DIV/0!	#DIV/0!	#DIV/0!	#DIV/0!	#DIV/0!	0
						#DIV/0!		#DIV/0!															#DIV/0!	#DIV/0!	#DIV/0!	#DIV/0!	#DIV/0!	#DIV/0!	#DIV/0!	#DIV/0!	#DIV/0!	#DIV/0!	#DIV/0!	#DIV/0!	#DIV/0!	0	0	0	0	0	0	#DIV/0!	#DIV/0!	#DIV/0!	#DIV/0!	#DIV/0!	#DIV/0!	#DIV/0!	0
						#DIV/0!		#DIV/0!															#DIV/0!	#DIV/0!	#DIV/0!	#DIV/0!	#DIV/0!	#DIV/0!	#DIV/0!	#DIV/0!	#DIV/0!	#DIV/0!	#DIV/0!	#DIV/0!	#DIV/0!	0	0	0	0	0	0	#DIV/0!	#DIV/0!	#DIV/0!	#DIV/0!	#DIV/0!	#DIV/0!	#DIV/0!	0
						#DIV/0!		#DIV/0!															#DIV/0!	#DIV/0!	#DIV/0!	#DIV/0!	#DIV/0!	#DIV/0!	#DIV/0!	#DIV/0!	#DIV/0!	#DIV/0!	#DIV/0!	#DIV/0!	#DIV/0!	0	0	0	0	0	0	#DIV/0!	#DIV/0!	#DIV/0!	#DIV/0!	#DIV/0!	#DIV/0!	#DIV/0!	0
						#DIV/0!		#DIV/0!															#DIV/0!	#DIV/0!	#DIV/0!	#DIV/0!	#DIV/0!	#DIV/0!	#DIV/0!	#DIV/0!	#DIV/0!	#DIV/0!	#DIV/0!	#DIV/0!	#DIV/0!	0	0	0	0	0	0	#DIV/0!	#DIV/0!	#DIV/0!	#DIV/0!	#DIV/0!	#DIV/0!	#DIV/0!	0
						#DIV/0!		#DIV/0!															#DIV/0!	#DIV/0!	#DIV/0!	#DIV/0!	#DIV/0!	#DIV/0!	#DIV/0!	#DIV/0!	#DIV/0!	#DIV/0!	#DIV/0!	#DIV/0!	#DIV/0!	0	0	0	0	0	0	#DIV/0!	#DIV/0!	#DIV/0!	#DIV/0!	#DIV/0!	#DIV/0!	#DIV/0!	0
						#DIV/0!		#DIV/0!															#DIV/0!	#DIV/0!	#DIV/0!	#DIV/0!	#DIV/0!	#DIV/0!	#DIV/0!	#DIV/0!	#DIV/0!	#DIV/0!	#DIV/0!	#DIV/0!	#DIV/0!	0	0	0	0	0	0	#DIV/0!	#DIV/0!	#DIV/0!	#DIV/0!	#DIV/0!	#DIV/0!	#DIV/0!	0
						#DIV/0!		#DIV/0!															#DIV/0!	#DIV/0!	#DIV/0!	#DIV/0!	#DIV/0!	#DIV/0!	#DIV/0!	#DIV/0!	#DIV/0!	#DIV/0!	#DIV/0!	#DIV/0!	#DIV/0!	0	0	0	0	0	0	#DIV/0!	#DIV/0!	#DIV/0!	#DIV/0!	#DIV/0!	#DIV/0!	#DIV/0!	0
						#DIV/0!		#DIV/0!															#DIV/0!	#DIV/0!	#DIV/0!	#DIV/0!	#DIV/0!	#DIV/0!	#DIV/0!	#DIV/0!	#DIV/0!	#DIV/0!	#DIV/0!	#DIV/0!	#DIV/0!	0	0	0	0	0	0	#DIV/0!	#DIV/0!	#DIV/0!	#DIV/0!	#DIV/0!	#DIV/0!	#DIV/0!	0
						#DIV/0!		#DIV/0!															#DIV/0!	#DIV/0!	#DIV/0!	#DIV/0!	#DIV/0!	#DIV/0!	#DIV/0!	#DIV/0!	#DIV/0!	#DIV/0!	#DIV/0!	#DIV/0!	#DIV/0!	0	0	0	0	0	0	#DIV/0!	#DIV/0!	#DIV/0!	#DIV/0!	#DIV/0!	#DIV/0!	#DIV/0!	0
						#DIV/0!		#DIV/0!															#DIV/0!	#DIV/0!	#DIV/0!	#DIV/0!	#DIV/0!	#DIV/0!	#DIV/0!	#DIV/0!	#DIV/0!	#DIV/0!	#DIV/0!	#DIV/0!	#DIV/0!	0	0	0	0	0	0	#DIV/0!	#DIV/0!	#DIV/0!	#DIV/0!	#DIV/0!	#DIV/0!	#DIV/0!	0
						#DIV/0!		#DIV/0!															#DIV/0!	#DIV/0!	#DIV/0!	#DIV/0!	#DIV/0!	#DIV/0!	#DIV/0!	#DIV/0!	#DIV/0!	#DIV/0!	#DIV/0!	#DIV/0!	#DIV/0!	0	0	0	0	0	0	#DIV/0!	#DIV/0!	#DIV/0!	#DIV/0!	#DIV/0!	#DIV/0!	#DIV/0!	0
						#DIV/0!		#DIV/0!															#DIV/0!	#DIV/0!	#DIV/0!	#DIV/0!	#DIV/0!	#DIV/0!	#DIV/0!	#DIV/0!	#DIV/0!	#DIV/0!	#DIV/0!	#DIV/0!	#DIV/0!	0	0	0	0	0	0	#DIV/0!	#DIV/0!	#DIV/0!	#DIV/0!	#DIV/0!	#DIV/0!	#DIV/0!	0
						#DIV/0!		#DIV/0!															#DIV/0!	#DIV/0!	#DIV/0!	#DIV/0!	#DIV/0!	#DIV/0!	#DIV/0!	#DIV/0!	#DIV/0!	#DIV/0!	#DIV/0!	#DIV/0!	#DIV/0!	0	0	0	0	0	0	#DIV/0!	#DIV/0!	#DIV/0!	#DIV/0!	#DIV/0!	#DIV/0!	#DIV/0!	0
						#DIV/0!		#DIV/0!															#DIV/0!	#DIV/0!	#DIV/0!	#DIV/0!	#DIV/0!	#DIV/0!	#DIV/0!	#DIV/0!	#DIV/0!	#DIV/0!	#DIV/0!	#DIV/0!	#DIV/0!	0	0	0	0	0	0	#DIV/0!	#DIV/0!	#DIV/0!	#DIV/0!	#DIV/0!	#DIV/0!	#DIV/0!	0
						#DIV/0!		#DIV/0!															#DIV/0!	#DIV/0!	#DIV/0!	#DIV/0!	#DIV/0!	#DIV/0!	#DIV/0!	#DIV/0!	#DIV/0!	#DIV/0!	#DIV/0!	#DIV/0!	#DIV/0!	0	0	0	0	0	0	#DIV/0!	#DIV/0!	#DIV/0!	#DIV/0!	#DIV/0!	#DIV/0!	#DIV/0!	0
						#DIV/0!		#DIV/0!															#DIV/0!	#DIV/0!	#DIV/0!	#DIV/0!	#DIV/0!	#DIV/0!	#DIV/0!	#DIV/0!	#DIV/0!	#DIV/0!	#DIV/0!	#DIV/0!	#DIV/0!	0	0	0	0	0	0	#DIV/0!	#DIV/0!	#DIV/0!	#DIV/0!	#DIV/0!	#DIV/0!	#DIV/0!	0
						#DIV/0!		#DIV/0!															#DIV/0!	#DIV/0!	#DIV/0!	#DIV/0!	#DIV/0!	#DIV/0!	#DIV/0!	#DIV/0!	#DIV/0!	#DIV/0!	#DIV/0!	#DIV/0!	#DIV/0!	0	0	0	0	0	0	#DIV/0!	#DIV/0!	#DIV/0!	#DIV/0!	#DIV/0!	#DIV/0!	#DIV/0!	0
						#DIV/0!		#DIV/0!															#DIV/0!	#DIV/0!	#DIV/0!	#DIV/0!	#DIV/0!	#DIV/0!	#DIV/0!	#DIV/0!	#DIV/0!	#DIV/0!	#DIV/0!	#DIV/0!	#DIV/0!	0	0	0	0	0	0	#DIV/0!	#DIV/0!	#DIV/0!	#DIV/0!	#DIV/0!	#DIV/0!	#DIV/0!	0
						#DIV/0!		#DIV/0!															#DIV/0!	#DIV/0!	#DIV/0!	#DIV/0!	#DIV/0!	#DIV/0!	#DIV/0!	#DIV/0!	#DIV/0!	#DIV/0!	#DIV/0!	#DIV/0!	#DIV/0!	0	0	0	0	0	0	#DIV/0!	#DIV/0!	#DIV/0!	#DIV/0!	#DIV/0!	#DIV/0!	#DIV/0!	0
						#DIV/0!		#DIV/0!															#DIV/0!	#DIV/0!	#DIV/0!	#DIV/0!	#DIV/0!	#DIV/0!	#DIV/0!	#DIV/0!	#DIV/0!	#DIV/0!	#DIV/0!	#DIV/0!	#DIV/0!	0	0	0	0	0	0	#DIV/0!	#DIV/0!	#DIV/0!	#DIV/0!	#DIV/0!	#DIV/0!	#DIV/0!	0
						#DIV/0!		#DIV/0!															#DIV/0!	#DIV/0!	#DIV/0!	#DIV/0!	#DIV/0!	#DIV/0!	#DIV/0!	#DIV/0!	#DIV/0!	#DIV/0!	#DIV/0!	#DIV/0!	#DIV/0!	0	0	0	0	0	0	#DIV/0!	#DIV/0!	#DIV/0!	#DIV/0!	#DIV/0!	#DIV/0!	#DIV/0!	0
						#DIV/0!		#DIV/0!															#DIV/0!	#DIV/0!	#DIV/0!	#DIV/0!	#DIV/0!	#DIV/0!	#DIV/0!	#DIV/0!	#DIV/0!	#DIV/0!	#DIV/0!	#DIV/0!	#DIV/0!	0	0	0	0	0	0	#DIV/0!	#DIV/0!	#DIV/0!	#DIV/0!	#DIV/0!	#DIV/0!	#DIV/0!	0
						#DIV/0!		#DIV/0!															#DIV/0!	#DIV/0!	#DIV/0!	#DIV/0!	#DIV/0!	#DIV/0!	#DIV/0!	#DIV/0!	#DIV/0!	#DIV/0!	#DIV/0!	#DIV/0!	#DIV/0!	0	0	0	0	0	0	#DIV/0!	#DIV/0!	#DIV/0!	#DIV/0!	#DIV/0!	#DIV/0!	#DIV/0!	0
						#DIV/0!		#DIV/0!															#DIV/0!	#DIV/0!	#DIV/0!	#DIV/0!	#DIV/0!	#DIV/0!	#DIV/0!	#DIV/0!	#DIV/0!	#DIV/0!	#DIV/0!	#DIV/0!	#DIV/0!	0	0	0	0	0	0	#DIV/0!	#DIV/0!	#DIV/0!	#DIV/0!	#DIV/0!	#DIV/0!	#DIV/0!	0
						#DIV/0!		#DIV/0!															#DIV/0!	#DIV/0!	#DIV/0!	#DIV/0!	#DIV/0!	#DIV/0!	#DIV/0!	#DIV/0!	#DIV/0!	#DIV/0!	#DIV/0!	#DIV/0!	#DIV/0!	0	0	0	0	0	0	#DIV/0!	#DIV/0!	#DIV/0!	#DIV/0!	#DIV/0!	#DIV/0!	#DIV/0!	0
						#DIV/0!		#DIV/0!															#DIV/0!	#DIV/0!	#DIV/0!	#DIV/0!	#DIV/0!	#DIV/0!	#DIV/0!	#DIV/0!	#DIV/0!	#DIV/0!	#DIV/0!	#DIV/0!	#DIV/0!	0	0	0	0	0	0	#DIV/0!	#DIV/0!	#DIV/0!	#DIV/0!	#DIV/0!	#DIV/0!	#DIV/0!	0
						#DIV/0!		#DIV/0!															#DIV/0!	#DIV/0!	#DIV/0!	#DIV/0!	#DIV/0!	#DIV/0!	#DIV/0!	#DIV/0!	#DIV/0!	#DIV/0!	#DIV/0!	#DIV/0!	#DIV/0!	0	0	0	0	0	0	#DIV/0!	#DIV/0!	#DIV/0!	#DIV/0!	#DIV/0!	#DIV/0!	#DIV/0!	0
						#DIV/0!		#DIV/0!															#DIV/0!	#DIV/0!	#DIV/0!	#DIV/0!	#DIV/0!	#DIV/0!	#DIV/0!	#DIV/0!	#DIV/0!	#DIV/0!	#DIV/0!	#DIV/0!	#DIV/0!	0	0	0	0	0	0	#DIV/0!	#DIV/0!	#DIV/0!	#DIV/0!	#DIV/0!	#DIV/0!	#DIV/0!	0
						#DIV/0!		#DIV/0!															#DIV/0!	#DIV/0!	#DIV/0!	#DIV/0!	#DIV/0!	#DIV/0!	#DIV/0!	#DIV/0!	#DIV/0!	#DIV/0!	#DIV/0!	#DIV/0!	#DIV/0!	0	0	0	0	0	0	#DIV/0!	#DIV/0!	#DIV/0!	#DIV/0!	#DIV/0!	#DIV/0!	#DIV/0!	0
						#DIV/0!		#DIV/0!															#DIV/0!	#DIV/0!	#DIV/0!	#DIV/0!	#DIV/0!	#DIV/0!	#DIV/0!	#DIV/0!	#DIV/0!	#DIV/0!	#DIV/0!	#DIV/0!	#DIV/0!	0	0	0	0	0	0	#DIV/0!	#DIV/0!	#DIV/0!	#DIV/0!	#DIV/0!	#DIV/0!	#DIV/0!	0
						#DIV/0!		#DIV/0!															#DIV/0!	#DIV/0!	#DIV/0!	#DIV/0!	#DIV/0!	#DIV/0!	#DIV/0!	#DIV/0!	#DIV/0!	#DIV/0!	#DIV/0!	#DIV/0!	#DIV/0!	0	0	0	0	0	0	#DIV/0!	#DIV/0!	#DIV/0!	#DIV/0!	#DIV/0!	#DIV/0!	#DIV/0!	0
						#DIV/0!		#DIV/0!															#DIV/0!	#DIV/0!	#DIV/0!	#DIV/0!	#DIV/0!	#DIV/0!	#DIV/0!	#DIV/0!	#DIV/0!	#DIV/0!	#DIV/0!	#DIV/0!	#DIV/0!	0	0	0	0	0	0	#DIV/0!	#DIV/0!	#DIV/0!	#DIV/0!	#DIV/0!	#DIV/0!	#DIV/0!	0
						#DIV/0!		#DIV/0!															#DIV/0!	#DIV/0!	#DIV/0!	#DIV/0!	#DIV/0!	#DIV/0!	#DIV/0!	#DIV/0!	#DIV/0!	#DIV/0!	#DIV/0!	#DIV/0!	#DIV/0!	0	0	0	0	0	0	#DIV/0!	#DIV/0!	#DIV/0!	#DIV/0!	#DIV/0!	#DIV/0!	#DIV/0!	0
						#DIV/0!		#DIV/0!															#DIV/0!	#DIV/0!	#DIV/0!	#DIV/0!	#DIV/0!	#DIV/0!	#DIV/0!	#DIV/0!	#DIV/0!	#DIV/0!	#DIV/0!	#DIV/0!	#DIV/0!	0	0	0	0	0	0	#DIV/0!	#DIV/0!	#DIV/0!	#DIV/0!	#DIV/0!	#DIV/0!	#DIV/0!	0
						#DIV/0!		#DIV/0!															#DIV/0!	#DIV/0!	#DIV/0!	#DIV/0!	#DIV/0!	#DIV/0!	#DIV/0!	#DIV/0!	#DIV/0!	#DIV/0!	#DIV/0!	#DIV/0!	#DIV/0!	0	0	0	0	0	0	#DIV/0!	#DIV/0!	#DIV/0!	#DIV/0!	#DIV/0!	#DIV/0!	#DIV/0!	0
						#DIV/0!		#DIV/0!															#DIV/0!	#DIV/0!	#DIV/0!	#DIV/0!	#DIV/0!	#DIV/0!	#DIV/0!	#DIV/0!	#DIV/0!	#DIV/0!	#DIV/0!	#DIV/0!	#DIV/0!	0	0	0	0	0	0	#DIV/0!	#DIV/0!	#DIV/0!	#DIV/0!	#DIV/0!	#DIV/0!	#DIV/0!	0
						#DIV/0!		#DIV/0!															#DIV/0!	#DIV/0!	#DIV/0!	#DIV/0!	#DIV/0!	#DIV/0!	#DIV/0!	#DIV/0!	#DIV/0!	#DIV/0!	#DIV/0!	#DIV/0!	#DIV/0!	0	0	0	0	0	0	#DIV/0!	#DIV/0!	#DIV/0!	#DIV/0!	#DIV/0!	#DIV/0!	#DIV/0!	0
						#DIV/0!		#DIV/0!															#DIV/0!	#DIV/0!	#DIV/0!	#DIV/0!	#DIV/0!	#DIV/0!	#DIV/0!	#DIV/0!	#DIV/0!	#DIV/0!	#DIV/0!	#DIV/0!	#DIV/0!	0	0	0	0	0	0	#DIV/0!	#DIV/0!	#DIV/0!	#DIV/0!	#DIV/0!	#DIV/0!	#DIV/0!	0
						#DIV/0!		#DIV/0!															#DIV/0!	#DIV/0!	#DIV/0!	#DIV/0!	#DIV/0!	#DIV/0!	#DIV/0!	#DIV/0!	#DIV/0!	#DIV/0!	#DIV/0!	#DIV/0!	#DIV/0!	0	0	0	0	0	0	#DIV/0!	#DIV/0!	#DIV/0!	#DIV/0!	#DIV/0!	#DIV/0!	#DIV/0!	0
						#DIV/0!		#DIV/0!															#DIV/0!	#DIV/0!	#DIV/0!	#DIV/0!	#DIV/0!	#DIV/0!	#DIV/0!	#DIV/0!	#DIV/0!	#DIV/0!	#DIV/0!	#DIV/0!	#DIV/0!	0	0	0	0	0	0	#DIV/0!	#DIV/0!	#DIV/0!	#DIV/0!	#DIV/0!	#DIV/0!	#DIV/0!	0
																							FALSE	FALSE	FALSE	FALSE	FALSE	FALSE	FALSE	FALSE	FALSE	FALSE	FALSE	FALSE	FALSE	0	0	0	0	0	0	0	0	0	0	0	0	0	0
																							FALSE	FALSE	FALSE	FALSE	FALSE	FALSE	FALSE	FALSE	FALSE	FALSE	FALSE	FALSE	FALSE	0	0	0	0	0	0	0	0	0	0	0	0	0	0
																							FALSE	FALSE	FALSE	FALSE	FALSE	FALSE	FALSE	FALSE	FALSE	FALSE	FALSE	FALSE	FALSE	0	0	0	0	0	0	0	0	0	0	0	0	0	0
																							FALSE	FALSE	FALSE	FALSE	FALSE	FALSE	FALSE	FALSE	FALSE	FALSE	FALSE	FALSE	FALSE	0	0	0	0	0	0	0	0	0	0	0	0	0	0
																							FALSE	FALSE	FALSE	FALSE	FALSE	FALSE	FALSE	FALSE	FALSE	FALSE	FALSE	FALSE	FALSE	0	0	0	0	0	0	0	0	0	0	0	0	0	0
																							FALSE	FALSE	FALSE	FALSE	FALSE	FALSE	FALSE	FALSE	FALSE	FALSE	FALSE	FALSE	FALSE	0	0	0	0	0	0	0	0	0	0	0	0	0	0
																							FALSE	FALSE	FALSE	FALSE	FALSE	FALSE	FALSE	FALSE	FALSE	FALSE	FALSE	FALSE	FALSE	0	0	0	0	0	0	0	0	0	0	0	0	0	0
																							FALSE	FALSE	FALSE	FALSE	FALSE	FALSE	FALSE	FALSE	FALSE	FALSE	FALSE	FALSE	FALSE	0	0	0	0	0	0	0	0	0	0	0	0	0	0
																							FALSE	FALSE	FALSE	FALSE	FALSE	FALSE	FALSE	FALSE	FALSE	FALSE	FALSE	FALSE	FALSE	0	0	0	0	0	0	0	0	0	0	0	0	0	0
																							FALSE	FALSE	FALSE	FALSE	FALSE	FALSE	FALSE	FALSE	FALSE	FALSE	FALSE	FALSE	FALSE	0	0	0	0	0	0	0	0	0	0	0	0	0	0
																							FALSE	FALSE	FALSE	FALSE	FALSE	FALSE	FALSE	FALSE	FALSE	FALSE	FALSE	FALSE	FALSE	0	0	0	0	0	0	0	0	0	0	0	0	0	0
																							FALSE	FALSE	FALSE	FALSE	FALSE	FALSE	FALSE	FALSE	FALSE	FALSE	FALSE	FALSE	FALSE	0	0	0	0	0	0	0	0	0	0	0	0	0	0
																							FALSE	FALSE	FALSE	FALSE	FALSE	FALSE	FALSE	FALSE	FALSE	FALSE	FALSE	FALSE	FALSE	0	0	0	0	0	0	0	0	0	0	0	0	0	0
																							FALSE	FALSE	FALSE	FALSE	FALSE	FALSE	FALSE	FALSE	FALSE	FALSE	FALSE	FALSE	FALSE	0	0	0	0	0	0	0	0	0	0	0	0	0	0
																							FALSE	FALSE	FALSE	FALSE	FALSE	FALSE	FALSE	FALSE	FALSE	FALSE	FALSE	FALSE	FALSE	0	0	0	0	0	0	0	0	0	0	0	0	0	0
																							FALSE	FALSE	FALSE	FALSE	FALSE	FALSE	FALSE	FALSE	FALSE	FALSE	FALSE	FALSE	FALSE	0	0	0	0	0	0	0	0	0	0	0	0	0	0
																							FALSE	FALSE	FALSE	FALSE	FALSE	FALSE	FALSE	FALSE	FALSE	FALSE	FALSE	FALSE	FALSE	0	0	0	0	0	0	0	0	0	0	0	0	0	0
																							FALSE	FALSE	FALSE	FALSE	FALSE	FALSE	FALSE	FALSE	FALSE	FALSE	FALSE	FALSE	FALSE	0	0	0	0	0	0	0	0	0	0	0	0	0	0
																							FALSE	FALSE	FALSE	FALSE	FALSE	FALSE	FALSE	FALSE	FALSE	FALSE	FALSE	FALSE	FALSE	0	0	0	0	0	0	0	0	0	0	0	0	0	0
																							FALSE	FALSE	FALSE	FALSE	FALSE	FALSE	FALSE	FALSE	FALSE	FALSE	FALSE	FALSE	FALSE	0	0	0	0	0	0	0	0	0	0	0	0	0	0
																							FALSE	FALSE	FALSE	FALSE	FALSE	FALSE	FALSE	FALSE	FALSE	FALSE	FALSE	FALSE	FALSE	0	0	0	0	0	0	0	0	0	0	0	0	0	0
																							FALSE	FALSE	FALSE	FALSE	FALSE	FALSE	FALSE	FALSE	FALSE	FALSE	FALSE	FALSE	FALSE	0	0	0	0	0	0	0	0	0	0	0	0	0	0
																							FALSE	FALSE	FALSE	FALSE	FALSE	FALSE	FALSE	FALSE	FALSE	FALSE	FALSE	FALSE	FALSE	0	0	0	0	0	0	0	0	0	0	0	0	0	0
																							FALSE	FALSE	FALSE	FALSE	FALSE	FALSE	FALSE	FALSE	FALSE	FALSE	FALSE	FALSE	FALSE	0	0	0	0	0	0	0	0	0	0	0	0	0	0
																							FALSE	FALSE	FALSE	FALSE	FALSE	FALSE	FALSE	FALSE	FALSE	FALSE	FALSE	FALSE	FALSE	0	0	0	0	0	0	0	0	0	0	0	0	0	0
																							FALSE	FALSE	FALSE	FALSE	FALSE	FALSE	FALSE	FALSE	FALSE	FALSE	FALSE	FALSE	FALSE	0	0	0	0	0	0	0	0	0	0	0	0	0	0
																							FALSE	FALSE	FALSE	FALSE	FALSE	FALSE	FALSE	FALSE	FALSE	FALSE	FALSE	FALSE	FALSE	0	0	0	0	0	0	0	0	0	0	0	0	0	0
																							FALSE	FALSE	FALSE	FALSE	FALSE	FALSE	FALSE	FALSE	FALSE	FALSE	FALSE	FALSE	FALSE	0	0	0	0	0	0	0	0	0	0	0	0	0	0
																							FALSE	FALSE	FALSE	FALSE	FALSE	FALSE	FALSE	FALSE	FALSE	FALSE	FALSE	FALSE	FALSE	0	0	0	0	0	0	0	0	0	0	0	0	0	0
																							FALSE	FALSE	FALSE	FALSE	FALSE	FALSE	FALSE	FALSE	FALSE	FALSE	FALSE	FALSE	FALSE	0	0	0	0	0	0	0	0	0	0	0	0	0	0
																							FALSE	FALSE	FALSE	FALSE	FALSE	FALSE	FALSE	FALSE	FALSE	FALSE	FALSE	FALSE	FALSE	0	0	0	0	0	0	0	0	0	0	0	0	0	0
																							FALSE	FALSE	FALSE	FALSE	FALSE	FALSE	FALSE	FALSE	FALSE	FALSE	FALSE	FALSE	FALSE	0	0	0	0	0	0	0	0	0	0	0	0	0	0
																							FALSE	FALSE	FALSE	FALSE	FALSE	FALSE	FALSE	FALSE	FALSE	FALSE	FALSE	FALSE	FALSE	0	0	0	0	0	0	0	0	0	0	0	0	0	0
																							FALSE	FALSE	FALSE	FALSE	FALSE	FALSE	FALSE	FALSE	FALSE	FALSE	FALSE	FALSE	FALSE	0	0	0	0	0	0	0	0	0	0	0	0	0	0
																							FALSE	FALSE	FALSE	FALSE	FALSE	FALSE	FALSE	FALSE	FALSE	FALSE	FALSE	FALSE	FALSE	0	0	0	0	0	0	0	0	0	0	0	0	0	0
																							FALSE	FALSE	FALSE	FALSE	FALSE	FALSE	FALSE	FALSE	FALSE	FALSE	FALSE	FALSE	FALSE	0	0	0	0	0	0	0	0	0	0	0	0	0	0
																							FALSE	FALSE	FALSE	FALSE	FALSE	FALSE	FALSE	FALSE	FALSE	FALSE	FALSE	FALSE	FALSE	0	0	0	0	0	0	0	0	0	0	0	0	0	0
																							FALSE	FALSE	FALSE	FALSE	FALSE	FALSE	FALSE	FALSE	FALSE	FALSE	FALSE	FALSE	FALSE	0	0	0	0	0	0	0	0	0	0	0	0	0	0
																							FALSE	FALSE	FALSE	FALSE	FALSE	FALSE	FALSE	FALSE	FALSE	FALSE	FALSE	FALSE	FALSE	0	0	0	0	0	0	0	0	0	0	0	0	0	0
																							FALSE	FALSE	FALSE	FALSE	FALSE	FALSE	FALSE	FALSE	FALSE	FALSE	FALSE	FALSE	FALSE	0	0	0	0	0	0	0	0	0	0	0	0	0	0
																							FALSE	FALSE	FALSE	FALSE	FALSE	FALSE	FALSE	FALSE	FALSE	FALSE	FALSE	FALSE	FALSE	0	0	0	0	0	0	0	0	0	0	0	0	0	0
																							FALSE	FALSE	FALSE	FALSE	FALSE	FALSE	FALSE	FALSE	FALSE	FALSE	FALSE	FALSE	FALSE	0	0	0	0	0	0	0	0	0	0	0	0	0	0
																							FALSE	FALSE	FALSE	FALSE	FALSE	FALSE	FALSE	FALSE	FALSE	FALSE	FALSE	FALSE	FALSE	0	0	0	0	0	0	0	0	0	0	0	0	0	0
																							FALSE	FALSE	FALSE	FALSE	FALSE	FALSE	FALSE	FALSE	FALSE	FALSE	FALSE	FALSE	FALSE	0	0	0	0	0	0	0	0	0	0	0	0	0	0
																							FALSE	FALSE	FALSE	FALSE	FALSE	FALSE	FALSE	FALSE	FALSE	FALSE	FALSE	FALSE	FALSE	0	0	0	0	0	0	0	0	0	0	0	0	0	0
																							FALSE	FALSE	FALSE	FALSE	FALSE	FALSE	FALSE	FALSE	FALSE	FALSE	FALSE	FALSE	FALSE	0	0	0	0	0	0	0	0	0	0	0	0	0	0
																							FALSE	FALSE	FALSE	FALSE	FALSE	FALSE	FALSE	FALSE	FALSE	FALSE	FALSE	FALSE	FALSE	0	0	0	0	0	0	0	0	0	0	0	0	0	0
																							FALSE	FALSE	FALSE	FALSE	FALSE	FALSE	FALSE	FALSE	FALSE	FALSE	FALSE	FALSE	FALSE	0	0	0	0	0	0	0	0	0	0	0	0	0	0
																							FALSE	FALSE	FALSE	FALSE	FALSE	FALSE	FALSE	FALSE	FALSE	FALSE	FALSE	FALSE	FALSE	0	0	0	0	0	0	0	0	0	0	0	0	0	0
																							FALSE	FALSE	FALSE	FALSE	FALSE	FALSE	FALSE	FALSE	FALSE	FALSE	FALSE	FALSE	FALSE	0	0	0	0	0	0	0	0	0	0	0	0	0	0
[truncated: 33 more columns]

## Sheet: Site6
Date:	2001-07-02
Site No. :	1v34
										Transect for		All spp except Mae par
			Width (m)	Length (m)	Area (ha)					Width (m)	Length (m)	Area (ha)
	Transect Dimensions:		1	50	0.005					15	50	0.075
	Co-ordinates:			X	Y						X	Y
			NW Corner							NW Corner
			SW Corner							SW Corner
			NE Corner							NE Corner
			SE Corner							SE Corner
									OED		OUD	NED		NUD	NFD	OFD	OBE	OBU	NBE	NBU	RE	Notes	Canopy volume (m3)																				Damage
Trans. No.	Sp. Code	Coppice	Height (m)	D1 (m)	D2 (m)	R	Shape	Adj. shape	Score	Eaten		Score	Eaten										Total	0.5	1	2	3	4	5	0.5	1	2	3	4	5	OED	OUD	NED	NUD	NFD	OFD	Old Rec. Vol.	OED	OUD	NED	NUD	NFD	OFD	Sp. Code
1a	Mae par		0.2	0.1	0.1	0.05	1	1															0.0015708	0.00392699	0.00785398	0.015708	0.0235619	0.0314159	0.0392699	0.0015708	0.0015708	0.0015708	0.0015708	0.0015708	0.0015708	0	0	0	0	0	0	0.0015708	0	0	0	0	0	0	Mae par
1a	Mae par		0.5	0.3	0.3	0.15	1	1															0.0353429	0.0353429	0.0706858	0.141372	0.212058	0.282743	0.353429	0.0353429	0.0353429	0.0353429	0.0353429	0.0353429	0.0353429	0	0	0	0	0	0	0.0353429	0	0	0	0	0	0	Mae par
1a	Mae par		0.3	0.5	0.4	0.225	1	1														browsed	0.0477129	0.0795216	0.159043	0.318086	0.477129	0.636173	0.795216	0.0477129	0.0477129	0.0477129	0.0477129	0.0477129	0.0477129	0	0	0	0	0	0	0.0477129	0	0	0	0	0	0	Mae par
1a	Mae par		0.4	0.6	0.6	0.3	1	1															0.113097	0.141372	0.282743	0.565487	0.84823	1.13097	1.41372	0.113097	0.113097	0.113097	0.113097	0.113097	0.113097	0	0	0	0	0	0	0.113097	0	0	0	0	0	0	Mae par
1a	Mae par		0.4	0.7	0.5	0.3	1	1															0.113097	0.141372	0.282743	0.565487	0.84823	1.13097	1.41372	0.113097	0.113097	0.113097	0.113097	0.113097	0.113097	0	0	0	0	0	0	0.113097	0	0	0	0	0	0	Mae par
1a	Mae par		0.3	0.2	0.2	0.1	1	1															0.00942478	0.015708	0.0314159	0.0628319	0.0942478	0.125664	0.15708	0.00942478	0.00942478	0.00942478	0.00942478	0.00942478	0.00942478	0	0	0	0	0	0	0.00942478	0	0	0	0	0	0	Mae par
1a	Mae par		0.2	0.3	0.1	0.1	1	1															0.00628319	0.015708	0.0314159	0.0628319	0.0942478	0.125664	0.15708	0.00628319	0.00628319	0.00628319	0.00628319	0.00628319	0.00628319	0	0	0	0	0	0	0.00628319	0	0	0	0	0	0	Mae par
1a	Mae par		0.1	0.2	0.1	0.075	1	1															0.00176715	0.00883573	0.0176715	0.0353429	0.0530144	0.0706858	0.0883573	0.00176715	0.00176715	0.00176715	0.00176715	0.00176715	0.00176715	0	0	0	0	0	0	0.00176715	0	0	0	0	0	0	Mae par
1a	Mae par		0.2	0.2	0.1	0.075	1	1															0.00353429	0.00883573	0.0176715	0.0353429	0.0530144	0.0706858	0.0883573	0.00353429	0.00353429	0.00353429	0.00353429	0.00353429	0.00353429	0	0	0	0	0	0	0.00353429	0	0	0	0	0	0	Mae par
1a	Mae par		0.1	0.1	0.1	0.05	1	1															0.000785398	0.00392699	0.00785398	0.015708	0.0235619	0.0314159	0.0392699	0.000785398	0.000785398	0.000785398	0.000785398	0.000785398	0.000785398	0	0	0	0	0	0	0.000785398	0	0	0	0	0	0	Mae par
1a	Mae par		0.1	0.1	0.1	0.05	1	1															0.000785398	0.00392699	0.00785398	0.015708	0.0235619	0.0314159	0.0392699	0.000785398	0.000785398	0.000785398	0.000785398	0.000785398	0.000785398	0	0	0	0	0	0	0.000785398	0	0	0	0	0	0	Mae par
1a	Mae par		0.1	0.1	0.1	0.05	1	1															0.000785398	0.00392699	0.00785398	0.015708	0.0235619	0.0314159	0.0392699	0.000785398	0.000785398	0.000785398	0.000785398	0.000785398	0.000785398	0	0	0	0	0	0	0.000785398	0	0	0	0	0	0	Mae par
1a	Mae par		0.2	0.2	0.1	0.075	1	1															0.00353429	0.00883573	0.0176715	0.0353429	0.0530144	0.0706858	0.0883573	0.00353429	0.00353429	0.00353429	0.00353429	0.00353429	0.00353429	0	0	0	0	0	0	0.00353429	0	0	0	0	0	0	Mae par
1a	Mae par		0.2	0.2	0.2	0.1	1	1															0.00628319	0.015708	0.0314159	0.0628319	0.0942478	0.125664	0.15708	0.00628319	0.00628319	0.00628319	0.00628319	0.00628319	0.00628319	0	0	0	0	0	0	0.00628319	0	0	0	0	0	0	Mae par
1	Gre bic		0.9	0.6	0.6	0.3	1	1															0.254469	0.141372	0.282743	0.565487	0.84823	1.13097	1.41372	0.141372	0.254469	0.254469	0.254469	0.254469	0.254469	0	0	0	0	0	0	0.254469	0	0	0	0	0	0	Gre bic
1	Dic cin		0.7	0.4	0.4	0.2	1	1															0.0879646	0.0628319	0.125664	0.251327	0.376991	0.502655	0.628319	0.0628319	0.0879646	0.0879646	0.0879646	0.0879646	0.0879646	0	0	0	0	0	0	0.0879646	0	0	0	0	0	0	Dic cin
1	Cad ter		0.8	0.9	0.6	0.375	1	1															0.353429	0.220893	0.441786	0.883573	1.32536	1.76715	2.20893	0.220893	0.353429	0.353429	0.353429	0.353429	0.353429	0	0	0	0	0	0	0.353429	0	0	0	0	0	0	Cad ter
1	Thy afr		0.6	0.9	0.6	0.375	1	1														browsed	0.265072	0.220893	0.441786	0.883573	1.32536	1.76715	2.20893	0.220893	0.265072	0.265072	0.265072	0.265072	0.265072	0	0	0	0	0	0	0.265072	0	0	0	0	0	0	Thy afr
1	Thy afr		0.1	0.1	0.1	0.05	1	1															0.000785398	0.00392699	0.00785398	0.015708	0.0235619	0.0314159	0.0392699	0.000785398	0.000785398	0.000785398	0.000785398	0.000785398	0.000785398	0	0	0	0	0	0	0.000785398	0	0	0	0	0	0	Thy afr
1	Thy afr		0.6	0.4	0.4	0.2	1	1														browsed	0.0753982	0.0628319	0.125664	0.251327	0.376991	0.502655	0.628319	0.0628319	0.0753982	0.0753982	0.0753982	0.0753982	0.0753982	0	0	0	0	0	0	0.0753982	0	0	0	0	0	0	Thy afr
1	Thy afr		0.2	0.2	0.2	0.1	1	1															0.00628319	0.015708	0.0314159	0.0628319	0.0942478	0.125664	0.15708	0.00628319	0.00628319	0.00628319	0.00628319	0.00628319	0.00628319	0	0	0	0	0	0	0.00628319	0	0	0	0	0	0	Thy afr
1	Cad ter		0.3	0.3	0.2	0.125	1	1															0.0147262	0.0245437	0.0490874	0.0981748	0.147262	0.19635	0.245437	0.0147262	0.0147262	0.0147262	0.0147262	0.0147262	0.0147262	0	0	0	0	0	0	0.0147262	0	0	0	0	0	0	Cad ter
1	Cro meg		0.3	0.2	0.1	0.075	1	1															0.00530144	0.00883573	0.0176715	0.0353429	0.0530144	0.0706858	0.0883573	0.00530144	0.00530144	0.00530144	0.00530144	0.00530144	0.00530144	0	0	0	0	0	0	0.00530144	0	0	0	0	0	0	Cro meg
1	Gre bic		1.5	2	2.2	1.05	1	1			1												5.19541	1.7318	3.46361	6.92721	10.3908	13.8544	17.318	1.7318	3.46361	5.19541	5.19541	5.19541	5.19541	0	5.5	0	0	0	0	5.49779	0	30.2378	0	0	0	0	Gre bic
1	Ere amo		1	0.4	0.3	0.175	1	1														browsed	0.0962113	0.0481056	0.0962113	0.192423	0.288634	0.384845	0.481056	0.0481056	0.0962113	0.0962113	0.0962113	0.0962113	0.0962113	0	0	0	0	0	0	0.0962113	0	0	0	0	0	0	Ere amo
1	Cad ter		0.7	0.3	0.3	0.15	1	1														browsed	0.0494801	0.0353429	0.0706858	0.141372	0.212058	0.282743	0.353429	0.0353429	0.0494801	0.0494801	0.0494801	0.0494801	0.0494801	0	0	0	0	0	0	0.0494801	0	0	0	0	0	0	Cad ter
1	Cad ter		0.9	0.5	0.3	0.2	1	1														browsed	0.113097	0.0628319	0.125664	0.251327	0.376991	0.502655	0.628319	0.0628319	0.113097	0.113097	0.113097	0.113097	0.113097	0	0	0	0	0	0	0.113097	0	0	0	0	0	0	Cad ter
1	Gre bic		0.5	0.5	0.3	0.2	1	1															0.0628319	0.0628319	0.125664	0.251327	0.376991	0.502655	0.628319	0.0628319	0.0628319	0.0628319	0.0628319	0.0628319	0.0628319	0	0	0	0	0	0	0.0628319	0	0	0	0	0	0	Gre bic
1	Gre bic		1.7	2.3	2.2	1.125	1	1			2												6.75933	1.98804	3.97608	7.95216	11.9282	15.9043	19.8804	1.98804	3.97608	6.75933	6.75933	6.75933	6.75933	0	18	0	0	0	0	8.24309	0	148.376	0	0	0	0	Gre bic
1	Gre bic		0.4	0.3	0.5	0.2	1	1															0.0502655	0.0628319	0.125664	0.251327	0.376991	0.502655	0.628319	0.0502655	0.0502655	0.0502655	0.0502655	0.0502655	0.0502655	0	0	0	0	0	0	0.0502655	0	0	0	0	0	0	Gre bic
1	Cad ter		0.5	0.2	0.2	0.1	1	1															0.015708	0.015708	0.0314159	0.0628319	0.0942478	0.125664	0.15708	0.015708	0.015708	0.015708	0.015708	0.015708	0.015708	0	0	0	0	0	0	0.015708	0	0	0	0	0	0	Cad ter
1	Gre bic		0.4	0.3	0.4	0.175	1	1															0.0384845	0.0481056	0.0962113	0.192423	0.288634	0.384845	0.481056	0.0384845	0.0384845	0.0384845	0.0384845	0.0384845	0.0384845	0	0	0	0	0	0	0.0384845	0	0	0	0	0	0	Gre bic
1	Col mop	1	0.7	0.5	0.8	0.325	1	1														browsed	0.232282	0.165915	0.331831	0.663661	0.995492	1.32732	1.65915	0.165915	0.232282	0.232282	0.232282	0.232282	0.232282	0	0	0	0	0	0	0.232282	0	0	0	0	0	0	Col mop
1	Gre bic		1.5	1.8	1.1	0.725	3	3															0.824824	0.580432	0.794275	0.855373	1.64965	4.64345	11.3031	0.580432	0.794275	0.824824	0.824824	0.824824	0.824824	0	0	0	0	0	0	0.824824	0	0	0	0	0	0	Gre bic
1	Dic cin		0.7	0.8	0.3	0.275	1	1															0.166308	0.118791	0.237583	0.475166	0.712749	0.950332	1.18791	0.118791	0.166308	0.166308	0.166308	0.166308	0.166308	0	0	0	0	0	0	0.166308	0	0	0	0	0	0	Dic cin
1	Cad ter		0.7	1.1	0.9	0.5	1	1															0.549779	0.392699	0.785398	1.5708	2.35619	3.14159	3.92699	0.392699	0.549779	0.549779	0.549779	0.549779	0.549779	0	0	0	0	0	0	0.549779	0	0	0	0	0	0	Cad ter
1	Thy afr		0.7	0.5	0.2	0.175	1	1															0.0673479	0.0481056	0.0962113	0.192423	0.288634	0.384845	0.481056	0.0481056	0.0673479	0.0673479	0.0673479	0.0673479	0.0673479	0	0	0	0	0	0	0.0673479	0	0	0	0	0	0	Thy afr
1	Gre bic		1.4	0.9	0.7	0.4	3	3															0.234338	0.172081	0.228872	0.252784	0.584136	1.73533	4.21876	0.172081	0.228872	0.234338	0.234338	0.234338	0.234338	0	0	0	0	0	0	0.234338	0	0	0	0	0	0	Gre bic
1	Gre bic		0.7	1.2	0.9	0.525	1	1															0.606131	0.432951	0.865901	1.7318	2.5977	3.46361	4.32951	0.432951	0.606131	0.606131	0.606131	0.606131	0.606131	0	0	0	0	0	0	0.606131	0	0	0	0	0	0	Gre bic
1	Aca tor		0.5	0.6	0.3	0.225	1	1															0.0795216	0.0795216	0.159043	0.318086	0.477129	0.636173	0.795216	0.0795216	0.0795216	0.0795216	0.0795216	0.0795216	0.0795216	0	0	0	0	0	0	0.0795216	0	0	0	0	0	0	Aca tor
1	Thy afr		0.3	0.2	0.2	0.1	1	1															0.00942478	0.015708	0.0314159	0.0628319	0.0942478	0.125664	0.15708	0.00942478	0.00942478	0.00942478	0.00942478	0.00942478	0.00942478	0	0	0	0	0	0	0.00942478	0	0	0	0	0	0	Thy afr
1	Cad ter		0.6	0.4	0.2	0.15	1	1															0.0424115	0.0353429	0.0706858	0.141372	0.212058	0.282743	0.353429	0.0353429	0.0424115	0.0424115	0.0424115	0.0424115	0.0424115	0	0	0	0	0	0	0.0424115	0	0	0	0	0	0	Cad ter
1	Cad ter		0.8	0.8	0.6	0.35	1	1															0.307876	0.192423	0.384845	0.76969	1.15454	1.53938	1.92423	0.192423	0.307876	0.307876	0.307876	0.307876	0.307876	0	0	0	0	0	0	0.307876	0	0	0	0	0	0	Cad ter
1	Gre bic		0.9	0.7	0.5	0.3	1	1															0.254469	0.141372	0.282743	0.565487	0.84823	1.13097	1.41372	0.141372	0.254469	0.254469	0.254469	0.254469	0.254469	0	0	0	0	0	0	0.254469	0	0	0	0	0	0	Gre bic
1	Gre fla		2.4	1.8	1.8	0.9	1	1														browsed	6.10726	1.27235	2.54469	5.08938	7.63407	10.1788	12.7235	1.27235	2.54469	5.08938	6.10726	6.10726	6.10726	0	0	0	0	0	0	6.10726	0	0	0	0	0	0	Gre fla
1	Ere amo		0.5	0.4	0.4	0.2	1	1														browsed	0.0628319	0.0628319	0.125664	0.251327	0.376991	0.502655	0.628319	0.0628319	0.0628319	0.0628319	0.0628319	0.0628319	0.0628319	0	0	0	0	0	0	0.0628319	0	0	0	0	0	0	Ere amo
1	Col mop	1	3	2	1.8	0.95	7	7															7.60623	1.41764	2.83529	5.67057	7.60623	3.57855	-12.6891	1.41764	2.83529	5.67057	7.60623	7.60623	7.60623	0	0	0	0	0	0	7.60623	0	0	0	0	0	0	Col mop
1	Dic cin		0.6	0.7	0.3	0.25	1	1															0.11781	0.0981748	0.19635	0.392699	0.589049	0.785398	0.981748	0.0981748	0.11781	0.11781	0.11781	0.11781	0.11781	0	0	0	0	0	0	0.11781	0	0	0	0	0	0	Dic cin
1	Cad ter		0.7	1	0.7	0.425	1	1														browsed	0.397215	0.283725	0.56745	1.1349	1.70235	2.2698	2.83725	0.283725	0.397215	0.397215	0.397215	0.397215	0.397215	0	0	0	0	0	0	0.397215	0	0	0	0	0	0	Cad ter
1	Gre bic		1.1	1	0.6	0.4	3	3															0.184122	0.154242	0.183984	0.284968	1.13295	3.55795	8.38995	0.154242	0.183984	0.184122	0.184122	0.184122	0.184122	0	0	0	0	0	0	0.184122	0	0	0	0	0	0	Gre bic
1	Cad ter		0.6	0.2	0.5	0.175	1	1															0.0577268	0.0481056	0.0962113	0.192423	0.288634	0.384845	0.481056	0.0481056	0.0577268	0.0577268	0.0577268	0.0577268	0.0577268	0	0	0	0	0	0	0.0577268	0	0	0	0	0	0	Cad ter
1	Col mop	1	1.5	4	6.3	2.575	1	1															31.2461	10.4154	20.8307	41.6614	62.4922	83.3229	104.154	10.4154	20.8307	31.2461	31.2461	31.2461	31.2461	0	0	0	0	0	0	31.2461	0	0	0	0	0	0	Col mop
1	Dic cin		0.6	0.7	0.7	0.35	1	1															0.230907	0.192423	0.384845	0.76969	1.15454	1.53938	1.92423	0.192423	0.230907	0.230907	0.230907	0.230907	0.230907	0	0	0	0	0	0	0.230907	0	0	0	0	0	0	Dic cin
1	Gre pac		0.9	0.9	0.6	0.375	1	1														browsed	0.397608	0.220893	0.441786	0.883573	1.32536	1.76715	2.20893	0.220893	0.397608	0.397608	0.397608	0.397608	0.397608	0	0	0	0	0	0	0.397608	0	0	0	0	0	0	Gre pac
1	Cad ter		0.6	0.4	0.6	0.25	1	1														browsed	0.11781	0.0981748	0.19635	0.392699	0.589049	0.785398	0.981748	0.0981748	0.11781	0.11781	0.11781	0.11781	0.11781	0	0	0	0	0	0	0.11781	0	0	0	0	0	0	Cad ter
1	Cad ter		0.6	0.5	0.3	0.2	1	1														browsed	0.0753982	0.0628319	0.125664	0.251327	0.376991	0.502655	0.628319	0.0628319	0.0753982	0.0753982	0.0753982	0.0753982	0.0753982	0	0	0	0	0	0	0.0753982	0	0	0	0	0	0	Cad ter
1	Cad ter		0.6	0.7	0.5	0.3	1	1														browsed	0.169646	0.141372	0.282743	0.565487	0.84823	1.13097	1.41372	0.141372	0.169646	0.169646	0.169646	0.169646	0.169646	0	0	0	0	0	0	0.169646	0	0	0	0	0	0	Cad ter
1	Thy afr		1	0.5	0.4	0.225	1	1															0.159043	0.0795216	0.159043	0.318086	0.477129	0.636173	0.795216	0.0795216	0.159043	0.159043	0.159043	0.159043	0.159043	0	0	0	0	0	0	0.159043	0	0	0	0	0	0	Thy afr
1	Dic cin		0.2	0.5	0.2	0.175	1	1															0.0192423	0.0481056	0.0962113	0.192423	0.288634	0.384845	0.481056	0.0192423	0.0192423	0.0192423	0.0192423	0.0192423	0.0192423	0	0	0	0	0	0	0.0192423	0	0	0	0	0	0	Dic cin
1	Col mop	1	1.9	2	1.8	0.95	1	1														browsed	5.38705	1.41764	2.83529	5.67057	8.50586	11.3411	14.1764	1.41764	2.83529	5.38705	5.38705	5.38705	5.38705	0	0	0	0	0	0	5.38705	0	0	0	0	0	0	Col mop
1	Cad ter		0.6	0.3	0.3	0.15	1	1															0.0424115	0.0353429	0.0706858	0.141372	0.212058	0.282743	0.353429	0.0353429	0.0424115	0.0424115	0.0424115	0.0424115	0.0424115	0	0	0	0	0	0	0.0424115	0	0	0	0	0	0	Cad ter
1	Gre bic		1.2	1.4	1.2	0.65	1	1			1												1.59279	0.663661	1.32732	2.65465	3.98197	5.30929	6.63661	0.663661	1.32732	1.59279	1.59279	1.59279	1.59279	0	5.5	0	0	0	0	1.68549	0	9.27019	0	0	0	0	Gre bic
1	Thy afr		0.3	0.4	0.4	0.2	1	1															0.0376991	0.0628319	0.125664	0.251327	0.376991	0.502655	0.628319	0.0376991	0.0376991	0.0376991	0.0376991	0.0376991	0.0376991	0	0	0	0	0	0	0.0376991	0	0	0	0	0	0	Thy afr
1	Thy afr		0.5	0.3	0.2	0.125	1	1															0.0245437	0.0245437	0.0490874	0.0981748	0.147262	0.19635	0.245437	0.0245437	0.0245437	0.0245437	0.0245437	0.0245437	0.0245437	0	0	0	0	0	0	0.0245437	0	0	0	0	0	0	Thy afr
1	Thy afr		0.3	0.3	0.2	0.125	1	1															0.0147262	0.0245437	0.0490874	0.0981748	0.147262	0.19635	0.245437	0.0147262	0.0147262	0.0147262	0.0147262	0.0147262	0.0147262	0	0	0	0	0	0	0.0147262	0	0	0	0	0	0	Thy afr
1	Thy afr		0.5	0.4	0.3	0.175	1	1															0.0481056	0.0481056	0.0962113	0.192423	0.288634	0.384845	0.481056	0.0481056	0.0481056	0.0481056	0.0481056	0.0481056	0.0481056	0	0	0	0	0	0	0.0481056	0	0	0	0	0	0	Thy afr
1	Thy afr		0.5	0.4	0.3	0.175	1	1															0.0481056	0.0481056	0.0962113	0.192423	0.288634	0.384845	0.481056	0.0481056	0.0481056	0.0481056	0.0481056	0.0481056	0.0481056	0	0	0	0	0	0	0.0481056	0	0	0	0	0	0	Thy afr
1	Gre bic		1.1	0.8	0.5	0.325	1	1															0.365014	0.165915	0.331831	0.663661	0.995492	1.32732	1.65915	0.165915	0.331831	0.365014	0.365014	0.365014	0.365014	0	0	0	0	0	0	0.365014	0	0	0	0	0	0	Gre bic
1	Thy afr		0.4	0.6	0.5	0.275	1	1															0.0950332	0.118791	0.237583	0.475166	0.712749	0.950332	1.18791	0.0950332	0.0950332	0.0950332	0.0950332	0.0950332	0.0950332	0	0	0	0	0	0	0.0950332	0	0	0	0	0	0	Thy afr
1	Thy afr		0.2	0.2	0.2	0.1	1	1															0.00628319	0.015708	0.0314159	0.0628319	0.0942478	0.125664	0.15708	0.00628319	0.00628319	0.00628319	0.00628319	0.00628319	0.00628319	0	0	0	0	0	0	0.00628319	0	0	0	0	0	0	Thy afr
1	Thy afr		0.7	0.4	0.7	0.275	1	1															0.166308	0.118791	0.237583	0.475166	0.712749	0.950332	1.18791	0.118791	0.166308	0.166308	0.166308	0.166308	0.166308	0	0	0	0	0	0	0.166308	0	0	0	0	0	0	Thy afr
1	Thy afr		0.7	0.3	0.2	0.125	1	1															0.0343612	0.0245437	0.0490874	0.0981748	0.147262	0.19635	0.245437	0.0245437	0.0343612	0.0343612	0.0343612	0.0343612	0.0343612	0	0	0	0	0	0	0.0343612	0	0	0	0	0	0	Thy afr
1	Thy afr		0.4	0.4	0.6	0.25	1	1															0.0785398	0.0981748	0.19635	0.392699	0.589049	0.785398	0.981748	0.0785398	0.0785398	0.0785398	0.0785398	0.0785398	0.0785398	0	0	0	0	0	0	0.0785398	0	0	0	0	0	0	Thy afr
1	Cro meg		0.4	0.2	0.1	0.075	1	1															0.00706858	0.00883573	0.0176715	0.0353429	0.0530144	0.0706858	0.0883573	0.00706858	0.00706858	0.00706858	0.00706858	0.00706858	0.00706858	0	0	0	0	0	0	0.00706858	0	0	0	0	0	0	Cro meg
1	Gre bic		2.8	4.6	4.4	2.25	7	7			1												32.58	7.95216	15.8018	28.5962	32.2892	20.6037	-12.7372	7.95216	15.8018	28.5962	32.58	32.58	32.58	0	5.5	0	0	0	0	34.4762	0	189.619	0	0	0	0	Gre bic
1	Ere amo		0.9	0.6	0.7	0.325	1	1														browsed	0.298648	0.165915	0.331831	0.663661	0.995492	1.32732	1.65915	0.165915	0.298648	0.298648	0.298648	0.298648	0.298648	0	0	0	0	0	0	0.298648	0	0	0	0	0	0	Ere amo
1	Thy afr		0.3	0.1	0.1	0.05	1	1															0.00235619	0.00392699	0.00785398	0.015708	0.0235619	0.0314159	0.0392699	0.00235619	0.00235619	0.00235619	0.00235619	0.00235619	0.00235619	0	0	0	0	0	0	0.00235619	0	0	0	0	0	0	Thy afr
1	Thy afr		0.2	0.1	0.1	0.05	1	1															0.0015708	0.00392699	0.00785398	0.015708	0.0235619	0.0314159	0.0392699	0.0015708	0.0015708	0.0015708	0.0015708	0.0015708	0.0015708	0	0	0	0	0	0	0.0015708	0	0	0	0	0	0	Thy afr
1	Thy afr		0.3	0.3	0.2	0.125	1	1															0.0147262	0.0245437	0.0490874	0.0981748	0.147262	0.19635	0.245437	0.0147262	0.0147262	0.0147262	0.0147262	0.0147262	0.0147262	0	0	0	0	0	0	0.0147262	0	0	0	0	0	0	Thy afr
1	Thy afr		0.4	0.2	0.1	0.075	1	1															0.00706858	0.00883573	0.0176715	0.0353429	0.0530144	0.0706858	0.0883573	0.00706858	0.00706858	0.00706858	0.00706858	0.00706858	0.00706858	0	0	0	0	0	0	0.00706858	0	0	0	0	0	0	Thy afr
1	Thy afr		0.2	0.4	0.2	0.15	1	1															0.0141372	0.0353429	0.0706858	0.141372	0.212058	0.282743	0.353429	0.0141372	0.0141372	0.0141372	0.0141372	0.0141372	0.0141372	0	0	0	0	0	0	0.0141372	0	0	0	0	0	0	Thy afr
1	Thy afr		0.2	0.4	0.2	0.15	1	1															0.0141372	0.0353429	0.0706858	0.141372	0.212058	0.282743	0.353429	0.0141372	0.0141372	0.0141372	0.0141372	0.0141372	0.0141372	0	0	0	0	0	0	0.0141372	0	0	0	0	0	0	Thy afr
1	Thy afr		0.2	0.3	0.2	0.125	1	1															0.00981748	0.0245437	0.0490874	0.0981748	0.147262	0.19635	0.245437	0.00981748	0.00981748	0.00981748	0.00981748	0.00981748	0.00981748	0	0	0	0	0	0	0.00981748	0	0	0	0	0	0	Thy afr
1	Gre bic		1.8	1	0.7	0.425	3	3															0.34013	0.211998	0.310269	0.340596	0.440909	0.961134	2.2512	0.211998	0.310269	0.34013	0.34013	0.34013	0.34013	0	0	0	0	0	0	0.34013	0	0	0	0	0	0	Gre bic
1	Hip ind		0.3	0.3	0.3	0.15	1	1															0.0212058	0.0353429	0.0706858	0.141372	0.212058	0.282743	0.353429	0.0212058	0.0212058	0.0212058	0.0212058	0.0212058	0.0212058	0	0	0	0	0	0	0.0212058	0	0	0	0	0	0	Hip ind
1	Cad ter		0.5	0.4	0.2	0.15	1	1															0.0353429	0.0353429	0.0706858	0.141372	0.212058	0.282743	0.353429	0.0353429	0.0353429	0.0353429	0.0353429	0.0353429	0.0353429	0	0	0	0	0	0	0.0353429	0	0	0	0	0	0	Cad ter
						#DIV/0!		#DIV/0!															#DIV/0!	#DIV/0!	#DIV/0!	#DIV/0!	#DIV/0!	#DIV/0!	#DIV/0!	#DIV/0!	#DIV/0!	#DIV/0!	#DIV/0!	#DIV/0!	#DIV/0!	0	0	0	0	0	0	#DIV/0!	#DIV/0!	#DIV/0!	#DIV/0!	#DIV/0!	#DIV/0!	#DIV/0!	0
						#DIV/0!		#DIV/0!															#DIV/0!	#DIV/0!	#DIV/0!	#DIV/0!	#DIV/0!	#DIV/0!	#DIV/0!	#DIV/0!	#DIV/0!	#DIV/0!	#DIV/0!	#DIV/0!	#DIV/0!	0	0	0	0	0	0	#DIV/0!	#DIV/0!	#DIV/0!	#DIV/0!	#DIV/0!	#DIV/0!	#DIV/0!	0
						#DIV/0!		#DIV/0!															#DIV/0!	#DIV/0!	#DIV/0!	#DIV/0!	#DIV/0!	#DIV/0!	#DIV/0!	#DIV/0!	#DIV/0!	#DIV/0!	#DIV/0!	#DIV/0!	#DIV/0!	0	0	0	0	0	0	#DIV/0!	#DIV/0!	#DIV/0!	#DIV/0!	#DIV/0!	#DIV/0!	#DIV/0!	0
						#DIV/0!		#DIV/0!															#DIV/0!	#DIV/0!	#DIV/0!	#DIV/0!	#DIV/0!	#DIV/0!	#DIV/0!	#DIV/0!	#DIV/0!	#DIV/0!	#DIV/0!	#DIV/0!	#DIV/0!	0	0	0	0	0	0	#DIV/0!	#DIV/0!	#DIV/0!	#DIV/0!	#DIV/0!	#DIV/0!	#DIV/0!	0
						#DIV/0!		#DIV/0!															#DIV/0!	#DIV/0!	#DIV/0!	#DIV/0!	#DIV/0!	#DIV/0!	#DIV/0!	#DIV/0!	#DIV/0!	#DIV/0!	#DIV/0!	#DIV/0!	#DIV/0!	0	0	0	0	0	0	#DIV/0!	#DIV/0!	#DIV/0!	#DIV/0!	#DIV/0!	#DIV/0!	#DIV/0!	0
						#DIV/0!		#DIV/0!															#DIV/0!	#DIV/0!	#DIV/0!	#DIV/0!	#DIV/0!	#DIV/0!	#DIV/0!	#DIV/0!	#DIV/0!	#DIV/0!	#DIV/0!	#DIV/0!	#DIV/0!	0	0	0	0	0	0	#DIV/0!	#DIV/0!	#DIV/0!	#DIV/0!	#DIV/0!	#DIV/0!	#DIV/0!	0
						#DIV/0!		#DIV/0!															#DIV/0!	#DIV/0!	#DIV/0!	#DIV/0!	#DIV/0!	#DIV/0!	#DIV/0!	#DIV/0!	#DIV/0!	#DIV/0!	#DIV/0!	#DIV/0!	#DIV/0!	0	0	0	0	0	0	#DIV/0!	#DIV/0!	#DIV/0!	#DIV/0!	#DIV/0!	#DIV/0!	#DIV/0!	0
						#DIV/0!		#DIV/0!															#DIV/0!	#DIV/0!	#DIV/0!	#DIV/0!	#DIV/0!	#DIV/0!	#DIV/0!	#DIV/0!	#DIV/0!	#DIV/0!	#DIV/0!	#DIV/0!	#DIV/0!	0	0	0	0	0	0	#DIV/0!	#DIV/0!	#DIV/0!	#DIV/0!	#DIV/0!	#DIV/0!	#DIV/0!	0
						#DIV/0!		#DIV/0!															#DIV/0!	#DIV/0!	#DIV/0!	#DIV/0!	#DIV/0!	#DIV/0!	#DIV/0!	#DIV/0!	#DIV/0!	#DIV/0!	#DIV/0!	#DIV/0!	#DIV/0!	0	0	0	0	0	0	#DIV/0!	#DIV/0!	#DIV/0!	#DIV/0!	#DIV/0!	#DIV/0!	#DIV/0!	0
						#DIV/0!		#DIV/0!															#DIV/0!	#DIV/0!	#DIV/0!	#DIV/0!	#DIV/0!	#DIV/0!	#DIV/0!	#DIV/0!	#DIV/0!	#DIV/0!	#DIV/0!	#DIV/0!	#DIV/0!	0	0	0	0	0	0	#DIV/0!	#DIV/0!	#DIV/0!	#DIV/0!	#DIV/0!	#DIV/0!	#DIV/0!	0
						#DIV/0!		#DIV/0!															#DIV/0!	#DIV/0!	#DIV/0!	#DIV/0!	#DIV/0!	#DIV/0!	#DIV/0!	#DIV/0!	#DIV/0!	#DIV/0!	#DIV/0!	#DIV/0!	#DIV/0!	0	0	0	0	0	0	#DIV/0!	#DIV/0!	#DIV/0!	#DIV/0!	#DIV/0!	#DIV/0!	#DIV/0!	0
						#DIV/0!		#DIV/0!															#DIV/0!	#DIV/0!	#DIV/0!	#DIV/0!	#DIV/0!	#DIV/0!	#DIV/0!	#DIV/0!	#DIV/0!	#DIV/0!	#DIV/0!	#DIV/0!	#DIV/0!	0	0	0	0	0	0	#DIV/0!	#DIV/0!	#DIV/0!	#DIV/0!	#DIV/0!	#DIV/0!	#DIV/0!	0
						#DIV/0!		#DIV/0!															#DIV/0!	#DIV/0!	#DIV/0!	#DIV/0!	#DIV/0!	#DIV/0!	#DIV/0!	#DIV/0!	#DIV/0!	#DIV/0!	#DIV/0!	#DIV/0!	#DIV/0!	0	0	0	0	0	0	#DIV/0!	#DIV/0!	#DIV/0!	#DIV/0!	#DIV/0!	#DIV/0!	#DIV/0!	0
						#DIV/0!		#DIV/0!															#DIV/0!	#DIV/0!	#DIV/0!	#DIV/0!	#DIV/0!	#DIV/0!	#DIV/0!	#DIV/0!	#DIV/0!	#DIV/0!	#DIV/0!	#DIV/0!	#DIV/0!	0	0	0	0	0	0	#DIV/0!	#DIV/0!	#DIV/0!	#DIV/0!	#DIV/0!	#DIV/0!	#DIV/0!	0
						#DIV/0!		#DIV/0!															#DIV/0!	#DIV/0!	#DIV/0!	#DIV/0!	#DIV/0!	#DIV/0!	#DIV/0!	#DIV/0!	#DIV/0!	#DIV/0!	#DIV/0!	#DIV/0!	#DIV/0!	0	0	0	0	0	0	#DIV/0!	#DIV/0!	#DIV/0!	#DIV/0!	#DIV/0!	#DIV/0!	#DIV/0!	0
						#DIV/0!		#DIV/0!															#DIV/0!	#DIV/0!	#DIV/0!	#DIV/0!	#DIV/0!	#DIV/0!	#DIV/0!	#DIV/0!	#DIV/0!	#DIV/0!	#DIV/0!	#DIV/0!	#DIV/0!	0	0	0	0	0	0	#DIV/0!	#DIV/0!	#DIV/0!	#DIV/0!	#DIV/0!	#DIV/0!	#DIV/0!	0
						#DIV/0!		#DIV/0!															#DIV/0!	#DIV/0!	#DIV/0!	#DIV/0!	#DIV/0!	#DIV/0!	#DIV/0!	#DIV/0!	#DIV/0!	#DIV/0!	#DIV/0!	#DIV/0!	#DIV/0!	0	0	0	0	0	0	#DIV/0!	#DIV/0!	#DIV/0!	#DIV/0!	#DIV/0!	#DIV/0!	#DIV/0!	0
						#DIV/0!		#DIV/0!															#DIV/0!	#DIV/0!	#DIV/0!	#DIV/0!	#DIV/0!	#DIV/0!	#DIV/0!	#DIV/0!	#DIV/0!	#DIV/0!	#DIV/0!	#DIV/0!	#DIV/0!	0	0	0	0	0	0	#DIV/0!	#DIV/0!	#DIV/0!	#DIV/0!	#DIV/0!	#DIV/0!	#DIV/0!	0
						#DIV/0!		#DIV/0!															#DIV/0!	#DIV/0!	#DIV/0!	#DIV/0!	#DIV/0!	#DIV/0!	#DIV/0!	#DIV/0!	#DIV/0!	#DIV/0!	#DIV/0!	#DIV/0!	#DIV/0!	0	0	0	0	0	0	#DIV/0!	#DIV/0!	#DIV/0!	#DIV/0!	#DIV/0!	#DIV/0!	#DIV/0!	0
						#DIV/0!		#DIV/0!															#DIV/0!	#DIV/0!	#DIV/0!	#DIV/0!	#DIV/0!	#DIV/0!	#DIV/0!	#DIV/0!	#DIV/0!	#DIV/0!	#DIV/0!	#DIV/0!	#DIV/0!	0	0	0	0	0	0	#DIV/0!	#DIV/0!	#DIV/0!	#DIV/0!	#DIV/0!	#DIV/0!	#DIV/0!	0
						#DIV/0!		#DIV/0!															#DIV/0!	#DIV/0!	#DIV/0!	#DIV/0!	#DIV/0!	#DIV/0!	#DIV/0!	#DIV/0!	#DIV/0!	#DIV/0!	#DIV/0!	#DIV/0!	#DIV/0!	0	0	0	0	0	0	#DIV/0!	#DIV/0!	#DIV/0!	#DIV/0!	#DIV/0!	#DIV/0!	#DIV/0!	0
						#DIV/0!		#DIV/0!															#DIV/0!	#DIV/0!	#DIV/0!	#DIV/0!	#DIV/0!	#DIV/0!	#DIV/0!	#DIV/0!	#DIV/0!	#DIV/0!	#DIV/0!	#DIV/0!	#DIV/0!	0	0	0	0	0	0	#DIV/0!	#DIV/0!	#DIV/0!	#DIV/0!	#DIV/0!	#DIV/0!	#DIV/0!	0
						#DIV/0!		#DIV/0!															#DIV/0!	#DIV/0!	#DIV/0!	#DIV/0!	#DIV/0!	#DIV/0!	#DIV/0!	#DIV/0!	#DIV/0!	#DIV/0!	#DIV/0!	#DIV/0!	#DIV/0!	0	0	0	0	0	0	#DIV/0!	#DIV/0!	#DIV/0!	#DIV/0!	#DIV/0!	#DIV/0!	#DIV/0!	0
						#DIV/0!		#DIV/0!															#DIV/0!	#DIV/0!	#DIV/0!	#DIV/0!	#DIV/0!	#DIV/0!	#DIV/0!	#DIV/0!	#DIV/0!	#DIV/0!	#DIV/0!	#DIV/0!	#DIV/0!	0	0	0	0	0	0	#DIV/0!	#DIV/0!	#DIV/0!	#DIV/0!	#DIV/0!	#DIV/0!	#DIV/0!	0
						#DIV/0!		#DIV/0!															#DIV/0!	#DIV/0!	#DIV/0!	#DIV/0!	#DIV/0!	#DIV/0!	#DIV/0!	#DIV/0!	#DIV/0!	#DIV/0!	#DIV/0!	#DIV/0!	#DIV/0!	0	0	0	0	0	0	#DIV/0!	#DIV/0!	#DIV/0!	#DIV/0!	#DIV/0!	#DIV/0!	#DIV/0!	0
						#DIV/0!		#DIV/0!															#DIV/0!	#DIV/0!	#DIV/0!	#DIV/0!	#DIV/0!	#DIV/0!	#DIV/0!	#DIV/0!	#DIV/0!	#DIV/0!	#DIV/0!	#DIV/0!	#DIV/0!	0	0	0	0	0	0	#DIV/0!	#DIV/0!	#DIV/0!	#DIV/0!	#DIV/0!	#DIV/0!	#DIV/0!	0
						#DIV/0!		#DIV/0!															#DIV/0!	#DIV/0!	#DIV/0!	#DIV/0!	#DIV/0!	#DIV/0!	#DIV/0!	#DIV/0!	#DIV/0!	#DIV/0!	#DIV/0!	#DIV/0!	#DIV/0!	0	0	0	0	0	0	#DIV/0!	#DIV/0!	#DIV/0!	#DIV/0!	#DIV/0!	#DIV/0!	#DIV/0!	0
						#DIV/0!		#DIV/0!															#DIV/0!	#DIV/0!	#DIV/0!	#DIV/0!	#DIV/0!	#DIV/0!	#DIV/0!	#DIV/0!	#DIV/0!	#DIV/0!	#DIV/0!	#DIV/0!	#DIV/0!	0	0	0	0	0	0	#DIV/0!	#DIV/0!	#DIV/0!	#DIV/0!	#DIV/0!	#DIV/0!	#DIV/0!	0
						#DIV/0!		#DIV/0!															#DIV/0!	#DIV/0!	#DIV/0!	#DIV/0!	#DIV/0!	#DIV/0!	#DIV/0!	#DIV/0!	#DIV/0!	#DIV/0!	#DIV/0!	#DIV/0!	#DIV/0!	0	0	0	0	0	0	#DIV/0!	#DIV/0!	#DIV/0!	#DIV/0!	#DIV/0!	#DIV/0!	#DIV/0!	0
						#DIV/0!		#DIV/0!															#DIV/0!	#DIV/0!	#DIV/0!	#DIV/0!	#DIV/0!	#DIV/0!	#DIV/0!	#DIV/0!	#DIV/0!	#DIV/0!	#DIV/0!	#DIV/0!	#DIV/0!	0	0	0	0	0	0	#DIV/0!	#DIV/0!	#DIV/0!	#DIV/0!	#DIV/0!	#DIV/0!	#DIV/0!	0
						#DIV/0!		#DIV/0!															#DIV/0!	#DIV/0!	#DIV/0!	#DIV/0!	#DIV/0!	#DIV/0!	#DIV/0!	#DIV/0!	#DIV/0!	#DIV/0!	#DIV/0!	#DIV/0!	#DIV/0!	0	0	0	0	0	0	#DIV/0!	#DIV/0!	#DIV/0!	#DIV/0!	#DIV/0!	#DIV/0!	#DIV/0!	0
						#DIV/0!		#DIV/0!															#DIV/0!	#DIV/0!	#DIV/0!	#DIV/0!	#DIV/0!	#DIV/0!	#DIV/0!	#DIV/0!	#DIV/0!	#DIV/0!	#DIV/0!	#DIV/0!	#DIV/0!	0	0	0	0	0	0	#DIV/0!	#DIV/0!	#DIV/0!	#DIV/0!	#DIV/0!	#DIV/0!	#DIV/0!	0
						#DIV/0!		#DIV/0!															#DIV/0!	#DIV/0!	#DIV/0!	#DIV/0!	#DIV/0!	#DIV/0!	#DIV/0!	#DIV/0!	#DIV/0!	#DIV/0!	#DIV/0!	#DIV/0!	#DIV/0!	0	0	0	0	0	0	#DIV/0!	#DIV/0!	#DIV/0!	#DIV/0!	#DIV/0!	#DIV/0!	#DIV/0!	0
						#DIV/0!		#DIV/0!															#DIV/0!	#DIV/0!	#DIV/0!	#DIV/0!	#DIV/0!	#DIV/0!	#DIV/0!	#DIV/0!	#DIV/0!	#DIV/0!	#DIV/0!	#DIV/0!	#DIV/0!	0	0	0	0	0	0	#DIV/0!	#DIV/0!	#DIV/0!	#DIV/0!	#DIV/0!	#DIV/0!	#DIV/0!	0
						#DIV/0!		#DIV/0!															#DIV/0!	#DIV/0!	#DIV/0!	#DIV/0!	#DIV/0!	#DIV/0!	#DIV/0!	#DIV/0!	#DIV/0!	#DIV/0!	#DIV/0!	#DIV/0!	#DIV/0!	0	0	0	0	0	0	#DIV/0!	#DIV/0!	#DIV/0!	#DIV/0!	#DIV/0!	#DIV/0!	#DIV/0!	0
						#DIV/0!		#DIV/0!															#DIV/0!	#DIV/0!	#DIV/0!	#DIV/0!	#DIV/0!	#DIV/0!	#DIV/0!	#DIV/0!	#DIV/0!	#DIV/0!	#DIV/0!	#DIV/0!	#DIV/0!	0	0	0	0	0	0	#DIV/0!	#DIV/0!	#DIV/0!	#DIV/0!	#DIV/0!	#DIV/0!	#DIV/0!	0
						#DIV/0!		#DIV/0!															#DIV/0!	#DIV/0!	#DIV/0!	#DIV/0!	#DIV/0!	#DIV/0!	#DIV/0!	#DIV/0!	#DIV/0!	#DIV/0!	#DIV/0!	#DIV/0!	#DIV/0!	0	0	0	0	0	0	#DIV/0!	#DIV/0!	#DIV/0!	#DIV/0!	#DIV/0!	#DIV/0!	#DIV/0!	0
						#DIV/0!		#DIV/0!															#DIV/0!	#DIV/0!	#DIV/0!	#DIV/0!	#DIV/0!	#DIV/0!	#DIV/0!	#DIV/0!	#DIV/0!	#DIV/0!	#DIV/0!	#DIV/0!	#DIV/0!	0	0	0	0	0	0	#DIV/0!	#DIV/0!	#DIV/0!	#DIV/0!	#DIV/0!	#DIV/0!	#DIV/0!	0
						#DIV/0!		#DIV/0!															#DIV/0!	#DIV/0!	#DIV/0!	#DIV/0!	#DIV/0!	#DIV/0!	#DIV/0!	#DIV/0!	#DIV/0!	#DIV/0!	#DIV/0!	#DIV/0!	#DIV/0!	0	0	0	0	0	0	#DIV/0!	#DIV/0!	#DIV/0!	#DIV/0!	#DIV/0!	#DIV/0!	#DIV/0!	0
						#DIV/0!		#DIV/0!															#DIV/0!	#DIV/0!	#DIV/0!	#DIV/0!	#DIV/0!	#DIV/0!	#DIV/0!	#DIV/0!	#DIV/0!	#DIV/0!	#DIV/0!	#DIV/0!	#DIV/0!	0	0	0	0	0	0	#DIV/0!	#DIV/0!	#DIV/0!	#DIV/0!	#DIV/0!	#DIV/0!	#DIV/0!	0
						#DIV/0!		#DIV/0!															#DIV/0!	#DIV/0!	#DIV/0!	#DIV/0!	#DIV/0!	#DIV/0!	#DIV/0!	#DIV/0!	#DIV/0!	#DIV/0!	#DIV/0!	#DIV/0!	#DIV/0!	0	0	0	0	0	0	#DIV/0!	#DIV/0!	#DIV/0!	#DIV/0!	#DIV/0!	#DIV/0!	#DIV/0!	0
						#DIV/0!		#DIV/0!															#DIV/0!	#DIV/0!	#DIV/0!	#DIV/0!	#DIV/0!	#DIV/0!	#DIV/0!	#DIV/0!	#DIV/0!	#DIV/0!	#DIV/0!	#DIV/0!	#DIV/0!	0	0	0	0	0	0	#DIV/0!	#DIV/0!	#DIV/0!	#DIV/0!	#DIV/0!	#DIV/0!	#DIV/0!	0
						#DIV/0!		#DIV/0!															#DIV/0!	#DIV/0!	#DIV/0!	#DIV/0!	#DIV/0!	#DIV/0!	#DIV/0!	#DIV/0!	#DIV/0!	#DIV/0!	#DIV/0!	#DIV/0!	#DIV/0!	0	0	0	0	0	0	#DIV/0!	#DIV/0!	#DIV/0!	#DIV/0!	#DIV/0!	#DIV/0!	#DIV/0!	0
						#DIV/0!		#DIV/0!															#DIV/0!	#DIV/0!	#DIV/0!	#DIV/0!	#DIV/0!	#DIV/0!	#DIV/0!	#DIV/0!	#DIV/0!	#DIV/0!	#DIV/0!	#DIV/0!	#DIV/0!	0	0	0	0	0	0	#DIV/0!	#DIV/0!	#DIV/0!	#DIV/0!	#DIV/0!	#DIV/0!	#DIV/0!	0
						#DIV/0!		#DIV/0!															#DIV/0!	#DIV/0!	#DIV/0!	#DIV/0!	#DIV/0!	#DIV/0!	#DIV/0!	#DIV/0!	#DIV/0!	#DIV/0!	#DIV/0!	#DIV/0!	#DIV/0!	0	0	0	0	0	0	#DIV/0!	#DIV/0!	#DIV/0!	#DIV/0!	#DIV/0!	#DIV/0!	#DIV/0!	0
						#DIV/0!		#DIV/0!															#DIV/0!	#DIV/0!	#DIV/0!	#DIV/0!	#DIV/0!	#DIV/0!	#DIV/0!	#DIV/0!	#DIV/0!	#DIV/0!	#DIV/0!	#DIV/0!	#DIV/0!	0	0	0	0	0	0	#DIV/0!	#DIV/0!	#DIV/0!	#DIV/0!	#DIV/0!	#DIV/0!	#DIV/0!	0
						#DIV/0!		#DIV/0!															#DIV/0!	#DIV/0!	#DIV/0!	#DIV/0!	#DIV/0!	#DIV/0!	#DIV/0!	#DIV/0!	#DIV/0!	#DIV/0!	#DIV/0!	#DIV/0!	#DIV/0!	0	0	0	0	0	0	#DIV/0!	#DIV/0!	#DIV/0!	#DIV/0!	#DIV/0!	#DIV/0!	#DIV/0!	0
						#DIV/0!		#DIV/0!															#DIV/0!	#DIV/0!	#DIV/0!	#DIV/0!	#DIV/0!	#DIV/0!	#DIV/0!	#DIV/0!	#DIV/0!	#DIV/0!	#DIV/0!	#DIV/0!	#DIV/0!	0	0	0	0	0	0	#DIV/0!	#DIV/0!	#DIV/0!	#DIV/0!	#DIV/0!	#DIV/0!	#DIV/0!	0
						#DIV/0!		#DIV/0!															#DIV/0!	#DIV/0!	#DIV/0!	#DIV/0!	#DIV/0!	#DIV/0!	#DIV/0!	#DIV/0!	#DIV/0!	#DIV/0!	#DIV/0!	#DIV/0!	#DIV/0!	0	0	0	0	0	0	#DIV/0!	#DIV/0!	#DIV/0!	#DIV/0!	#DIV/0!	#DIV/0!	#DIV/0!	0
						#DIV/0!		#DIV/0!															#DIV/0!	#DIV/0!	#DIV/0!	#DIV/0!	#DIV/0!	#DIV/0!	#DIV/0!	#DIV/0!	#DIV/0!	#DIV/0!	#DIV/0!	#DIV/0!	#DIV/0!	0	0	0	0	0	0	#DIV/0!	#DIV/0!	#DIV/0!	#DIV/0!	#DIV/0!	#DIV/0!	#DIV/0!	0
						#DIV/0!		#DIV/0!															#DIV/0!	#DIV/0!	#DIV/0!	#DIV/0!	#DIV/0!	#DIV/0!	#DIV/0!	#DIV/0!	#DIV/0!	#DIV/0!	#DIV/0!	#DIV/0!	#DIV/0!	0	0	0	0	0	0	#DIV/0!	#DIV/0!	#DIV/0!	#DIV/0!	#DIV/0!	#DIV/0!	#DIV/0!	0
						#DIV/0!		#DIV/0!															#DIV/0!	#DIV/0!	#DIV/0!	#DIV/0!	#DIV/0!	#DIV/0!	#DIV/0!	#DIV/0!	#DIV/0!	#DIV/0!	#DIV/0!	#DIV/0!	#DIV/0!	0	0	0	0	0	0	#DIV/0!	#DIV/0!	#DIV/0!	#DIV/0!	#DIV/0!	#DIV/0!	#DIV/0!	0
						#DIV/0!		#DIV/0!															#DIV/0!	#DIV/0!	#DIV/0!	#DIV/0!	#DIV/0!	#DIV/0!	#DIV/0!	#DIV/0!	#DIV/0!	#DIV/0!	#DIV/0!	#DIV/0!	#DIV/0!	0	0	0	0	0	0	#DIV/0!	#DIV/0!	#DIV/0!	#DIV/0!	#DIV/0!	#DIV/0!	#DIV/0!	0
						#DIV/0!		#DIV/0!															#DIV/0!	#DIV/0!	#DIV/0!	#DIV/0!	#DIV/0!	#DIV/0!	#DIV/0!	#DIV/0!	#DIV/0!	#DIV/0!	#DIV/0!	#DIV/0!	#DIV/0!	0	0	0	0	0	0	#DIV/0!	#DIV/0!	#DIV/0!	#DIV/0!	#DIV/0!	#DIV/0!	#DIV/0!	0
						#DIV/0!		#DIV/0!															#DIV/0!	#DIV/0!	#DIV/0!	#DIV/0!	#DIV/0!	#DIV/0!	#DIV/0!	#DIV/0!	#DIV/0!	#DIV/0!	#DIV/0!	#DIV/0!	#DIV/0!	0	0	0	0	0	0	#DIV/0!	#DIV/0!	#DIV/0!	#DIV/0!	#DIV/0!	#DIV/0!	#DIV/0!	0
						#DIV/0!		#DIV/0!															#DIV/0!	#DIV/0!	#DIV/0!	#DIV/0!	#DIV/0!	#DIV/0!	#DIV/0!	#DIV/0!	#DIV/0!	#DIV/0!	#DIV/0!	#DIV/0!	#DIV/0!	0	0	0	0	0	0	#DIV/0!	#DIV/0!	#DIV/0!	#DIV/0!	#DIV/0!	#DIV/0!	#DIV/0!	0
						#DIV/0!		#DIV/0!															#DIV/0!	#DIV/0!	#DIV/0!	#DIV/0!	#DIV/0!	#DIV/0!	#DIV/0!	#DIV/0!	#DIV/0!	#DIV/0!	#DIV/0!	#DIV/0!	#DIV/0!	0	0	0	0	0	0	#DIV/0!	#DIV/0!	#DIV/0!	#DIV/0!	#DIV/0!	#DIV/0!	#DIV/0!	0
						#DIV/0!		#DIV/0!															#DIV/0!	#DIV/0!	#DIV/0!	#DIV/0!	#DIV/0!	#DIV/0!	#DIV/0!	#DIV/0!	#DIV/0!	#DIV/0!	#DIV/0!	#DIV/0!	#DIV/0!	0	0	0	0	0	0	#DIV/0!	#DIV/0!	#DIV/0!	#DIV/0!	#DIV/0!	#DIV/0!	#DIV/0!	0
						#DIV/0!		#DIV/0!															#DIV/0!	#DIV/0!	#DIV/0!	#DIV/0!	#DIV/0!	#DIV/0!	#DIV/0!	#DIV/0!	#DIV/0!	#DIV/0!	#DIV/0!	#DIV/0!	#DIV/0!	0	0	0	0	0	0	#DIV/0!	#DIV/0!	#DIV/0!	#DIV/0!	#DIV/0!	#DIV/0!	#DIV/0!	0
						#DIV/0!		#DIV/0!															#DIV/0!	#DIV/0!	#DIV/0!	#DIV/0!	#DIV/0!	#DIV/0!	#DIV/0!	#DIV/0!	#DIV/0!	#DIV/0!	#DIV/0!	#DIV/0!	#DIV/0!	0	0	0	0	0	0	#DIV/0!	#DIV/0!	#DIV/0!	#DIV/0!	#DIV/0!	#DIV/0!	#DIV/0!	0
						#DIV/0!		#DIV/0!															#DIV/0!	#DIV/0!	#DIV/0!	#DIV/0!	#DIV/0!	#DIV/0!	#DIV/0!	#DIV/0!	#DIV/0!	#DIV/0!	#DIV/0!	#DIV/0!	#DIV/0!	0	0	0	0	0	0	#DIV/0!	#DIV/0!	#DIV/0!	#DIV/0!	#DIV/0!	#DIV/0!	#DIV/0!	0
						#DIV/0!		#DIV/0!															#DIV/0!	#DIV/0!	#DIV/0!	#DIV/0!	#DIV/0!	#DIV/0!	#DIV/0!	#DIV/0!	#DIV/0!	#DIV/0!	#DIV/0!	#DIV/0!	#DIV/0!	0	0	0	0	0	0	#DIV/0!	#DIV/0!	#DIV/0!	#DIV/0!	#DIV/0!	#DIV/0!	#DIV/0!	0
						#DIV/0!		#DIV/0!															#DIV/0!	#DIV/0!	#DIV/0!	#DIV/0!	#DIV/0!	#DIV/0!	#DIV/0!	#DIV/0!	#DIV/0!	#DIV/0!	#DIV/0!	#DIV/0!	#DIV/0!	0	0	0	0	0	0	#DIV/0!	#DIV/0!	#DIV/0!	#DIV/0!	#DIV/0!	#DIV/0!	#DIV/0!	0
						#DIV/0!		#DIV/0!															#DIV/0!	#DIV/0!	#DIV/0!	#DIV/0!	#DIV/0!	#DIV/0!	#DIV/0!	#DIV/0!	#DIV/0!	#DIV/0!	#DIV/0!	#DIV/0!	#DIV/0!	0	0	0	0	0	0	#DIV/0!	#DIV/0!	#DIV/0!	#DIV/0!	#DIV/0!	#DIV/0!	#DIV/0!	0
						#DIV/0!		#DIV/0!															#DIV/0!	#DIV/0!	#DIV/0!	#DIV/0!	#DIV/0!	#DIV/0!	#DIV/0!	#DIV/0!	#DIV/0!	#DIV/0!	#DIV/0!	#DIV/0!	#DIV/0!	0	0	0	0	0	0	#DIV/0!	#DIV/0!	#DIV/0!	#DIV/0!	#DIV/0!	#DIV/0!	#DIV/0!	0
						#DIV/0!		#DIV/0!															#DIV/0!	#DIV/0!	#DIV/0!	#DIV/0!	#DIV/0!	#DIV/0!	#DIV/0!	#DIV/0!	#DIV/0!	#DIV/0!	#DIV/0!	#DIV/0!	#DIV/0!	0	0	0	0	0	0	#DIV/0!	#DIV/0!	#DIV/0!	#DIV/0!	#DIV/0!	#DIV/0!	#DIV/0!	0
						#DIV/0!		#DIV/0!															#DIV/0!	#DIV/0!	#DIV/0!	#DIV/0!	#DIV/0!	#DIV/0!	#DIV/0!	#DIV/0!	#DIV/0!	#DIV/0!	#DIV/0!	#DIV/0!	#DIV/0!	0	0	0	0	0	0	#DIV/0!	#DIV/0!	#DIV/0!	#DIV/0!	#DIV/0!	#DIV/0!	#DIV/0!	0
						#DIV/0!		#DIV/0!															#DIV/0!	#DIV/0!	#DIV/0!	#DIV/0!	#DIV/0!	#DIV/0!	#DIV/0!	#DIV/0!	#DIV/0!	#DIV/0!	#DIV/0!	#DIV/0!	#DIV/0!	0	0	0	0	0	0	#DIV/0!	#DIV/0!	#DIV/0!	#DIV/0!	#DIV/0!	#DIV/0!	#DIV/0!	0
						#DIV/0!		#DIV/0!															#DIV/0!	#DIV/0!	#DIV/0!	#DIV/0!	#DIV/0!	#DIV/0!	#DIV/0!	#DIV/0!	#DIV/0!	#DIV/0!	#DIV/0!	#DIV/0!	#DIV/0!	0	0	0	0	0	0	#DIV/0!	#DIV/0!	#DIV/0!	#DIV/0!	#DIV/0!	#DIV/0!	#DIV/0!	0
						#DIV/0!		#DIV/0!															#DIV/0!	#DIV/0!	#DIV/0!	#DIV/0!	#DIV/0!	#DIV/0!	#DIV/0!	#DIV/0!	#DIV/0!	#DIV/0!	#DIV/0!	#DIV/0!	#DIV/0!	0	0	0	0	0	0	#DIV/0!	#DIV/0!	#DIV/0!	#DIV/0!	#DIV/0!	#DIV/0!	#DIV/0!	0
						#DIV/0!		#DIV/0!															#DIV/0!	#DIV/0!	#DIV/0!	#DIV/0!	#DIV/0!	#DIV/0!	#DIV/0!	#DIV/0!	#DIV/0!	#DIV/0!	#DIV/0!	#DIV/0!	#DIV/0!	0	0	0	0	0	0	#DIV/0!	#DIV/0!	#DIV/0!	#DIV/0!	#DIV/0!	#DIV/0!	#DIV/0!	0
						#DIV/0!		#DIV/0!															#DIV/0!	#DIV/0!	#DIV/0!	#DIV/0!	#DIV/0!	#DIV/0!	#DIV/0!	#DIV/0!	#DIV/0!	#DIV/0!	#DIV/0!	#DIV/0!	#DIV/0!	0	0	0	0	0	0	#DIV/0!	#DIV/0!	#DIV/0!	#DIV/0!	#DIV/0!	#DIV/0!	#DIV/0!	0
						#DIV/0!		#DIV/0!															#DIV/0!	#DIV/0!	#DIV/0!	#DIV/0!	#DIV/0!	#DIV/0!	#DIV/0!	#DIV/0!	#DIV/0!	#DIV/0!	#DIV/0!	#DIV/0!	#DIV/0!	0	0	0	0	0	0	#DIV/0!	#DIV/0!	#DIV/0!	#DIV/0!	#DIV/0!	#DIV/0!	#DIV/0!	0
						#DIV/0!		#DIV/0!															#DIV/0!	#DIV/0!	#DIV/0!	#DIV/0!	#DIV/0!	#DIV/0!	#DIV/0!	#DIV/0!	#DIV/0!	#DIV/0!	#DIV/0!	#DIV/0!	#DIV/0!	0	0	0	0	0	0	#DIV/0!	#DIV/0!	#DIV/0!	#DIV/0!	#DIV/0!	#DIV/0!	#DIV/0!	0
						#DIV/0!		#DIV/0!															#DIV/0!	#DIV/0!	#DIV/0!	#DIV/0!	#DIV/0!	#DIV/0!	#DIV/0!	#DIV/0!	#DIV/0!	#DIV/0!	#DIV/0!	#DIV/0!	#DIV/0!	0	0	0	0	0	0	#DIV/0!	#DIV/0!	#DIV/0!	#DIV/0!	#DIV/0!	#DIV/0!	#DIV/0!	0
						#DIV/0!		#DIV/0!															#DIV/0!	#DIV/0!	#DIV/0!	#DIV/0!	#DIV/0!	#DIV/0!	#DIV/0!	#DIV/0!	#DIV/0!	#DIV/0!	#DIV/0!	#DIV/0!	#DIV/0!	0	0	0	0	0	0	#DIV/0!	#DIV/0!	#DIV/0!	#DIV/0!	#DIV/0!	#DIV/0!	#DIV/0!	0
						#DIV/0!		#DIV/0!															#DIV/0!	#DIV/0!	#DIV/0!	#DIV/0!	#DIV/0!	#DIV/0!	#DIV/0!	#DIV/0!	#DIV/0!	#DIV/0!	#DIV/0!	#DIV/0!	#DIV/0!	0	0	0	0	0	0	#DIV/0!	#DIV/0!	#DIV/0!	#DIV/0!	#DIV/0!	#DIV/0!	#DIV/0!	0
						#DIV/0!		#DIV/0!															#DIV/0!	#DIV/0!	#DIV/0!	#DIV/0!	#DIV/0!	#DIV/0!	#DIV/0!	#DIV/0!	#DIV/0!	#DIV/0!	#DIV/0!	#DIV/0!	#DIV/0!	0	0	0	0	0	0	#DIV/0!	#DIV/0!	#DIV/0!	#DIV/0!	#DIV/0!	#DIV/0!	#DIV/0!	0
						#DIV/0!		#DIV/0!															#DIV/0!	#DIV/0!	#DIV/0!	#DIV/0!	#DIV/0!	#DIV/0!	#DIV/0!	#DIV/0!	#DIV/0!	#DIV/0!	#DIV/0!	#DIV/0!	#DIV/0!	0	0	0	0	0	0	#DIV/0!	#DIV/0!	#DIV/0!	#DIV/0!	#DIV/0!	#DIV/0!	#DIV/0!	0
						#DIV/0!		#DIV/0!															#DIV/0!	#DIV/0!	#DIV/0!	#DIV/0!	#DIV/0!	#DIV/0!	#DIV/0!	#DIV/0!	#DIV/0!	#DIV/0!	#DIV/0!	#DIV/0!	#DIV/0!	0	0	0	0	0	0	#DIV/0!	#DIV/0!	#DIV/0!	#DIV/0!	#DIV/0!	#DIV/0!	#DIV/0!	0
						#DIV/0!		#DIV/0!															#DIV/0!	#DIV/0!	#DIV/0!	#DIV/0!	#DIV/0!	#DIV/0!	#DIV/0!	#DIV/0!	#DIV/0!	#DIV/0!	#DIV/0!	#DIV/0!	#DIV/0!	0	0	0	0	0	0	#DIV/0!	#DIV/0!	#DIV/0!	#DIV/0!	#DIV/0!	#DIV/0!	#DIV/0!	0
						#DIV/0!		#DIV/0!															#DIV/0!	#DIV/0!	#DIV/0!	#DIV/0!	#DIV/0!	#DIV/0!	#DIV/0!	#DIV/0!	#DIV/0!	#DIV/0!	#DIV/0!	#DIV/0!	#DIV/0!	0	0	0	0	0	0	#DIV/0!	#DIV/0!	#DIV/0!	#DIV/0!	#DIV/0!	#DIV/0!	#DIV/0!	0
						#DIV/0!		#DIV/0!															#DIV/0!	#DIV/0!	#DIV/0!	#DIV/0!	#DIV/0!	#DIV/0!	#DIV/0!	#DIV/0!	#DIV/0!	#DIV/0!	#DIV/0!	#DIV/0!	#DIV/0!	0	0	0	0	0	0	#DIV/0!	#DIV/0!	#DIV/0!	#DIV/0!	#DIV/0!	#DIV/0!	#DIV/0!	0
						#DIV/0!		#DIV/0!															#DIV/0!	#DIV/0!	#DIV/0!	#DIV/0!	#DIV/0!	#DIV/0!	#DIV/0!	#DIV/0!	#DIV/0!	#DIV/0!	#DIV/0!	#DIV/0!	#DIV/0!	0	0	0	0	0	0	#DIV/0!	#DIV/0!	#DIV/0!	#DIV/0!	#DIV/0!	#DIV/0!	#DIV/0!	0
						#DIV/0!		#DIV/0!															#DIV/0!	#DIV/0!	#DIV/0!	#DIV/0!	#DIV/0!	#DIV/0!	#DIV/0!	#DIV/0!	#DIV/0!	#DIV/0!	#DIV/0!	#DIV/0!	#DIV/0!	0	0	0	0	0	0	#DIV/0!	#DIV/0!	#DIV/0!	#DIV/0!	#DIV/0!	#DIV/0!	#DIV/0!	0
						#DIV/0!		#DIV/0!															#DIV/0!	#DIV/0!	#DIV/0!	#DIV/0!	#DIV/0!	#DIV/0!	#DIV/0!	#DIV/0!	#DIV/0!	#DIV/0!	#DIV/0!	#DIV/0!	#DIV/0!	0	0	0	0	0	0	#DIV/0!	#DIV/0!	#DIV/0!	#DIV/0!	#DIV/0!	#DIV/0!	#DIV/0!	0
						#DIV/0!		#DIV/0!															#DIV/0!	#DIV/0!	#DIV/0!	#DIV/0!	#DIV/0!	#DIV/0!	#DIV/0!	#DIV/0!	#DIV/0!	#DIV/0!	#DIV/0!	#DIV/0!	#DIV/0!	0	0	0	0	0	0	#DIV/0!	#DIV/0!	#DIV/0!	#DIV/0!	#DIV/0!	#DIV/0!	#DIV/0!	0
						#DIV/0!		#DIV/0!															#DIV/0!	#DIV/0!	#DIV/0!	#DIV/0!	#DIV/0!	#DIV/0!	#DIV/0!	#DIV/0!	#DIV/0!	#DIV/0!	#DIV/0!	#DIV/0!	#DIV/0!	0	0	0	0	0	0	#DIV/0!	#DIV/0!	#DIV/0!	#DIV/0!	#DIV/0!	#DIV/0!	#DIV/0!	0
						#DIV/0!		#DIV/0!															#DIV/0!	#DIV/0!	#DIV/0!	#DIV/0!	#DIV/0!	#DIV/0!	#DIV/0!	#DIV/0!	#DIV/0!	#DIV/0!	#DIV/0!	#DIV/0!	#DIV/0!	0	0	0	0	0	0	#DIV/0!	#DIV/0!	#DIV/0!	#DIV/0!	#DIV/0!	#DIV/0!	#DIV/0!	0
						#DIV/0!		#DIV/0!															#DIV/0!	#DIV/0!	#DIV/0!	#DIV/0!	#DIV/0!	#DIV/0!	#DIV/0!	#DIV/0!	#DIV/0!	#DIV/0!	#DIV/0!	#DIV/0!	#DIV/0!	0	0	0	0	0	0	#DIV/0!	#DIV/0!	#DIV/0!	#DIV/0!	#DIV/0!	#DIV/0!	#DIV/0!	0
						#DIV/0!		#DIV/0!															#DIV/0!	#DIV/0!	#DIV/0!	#DIV/0!	#DIV/0!	#DIV/0!	#DIV/0!	#DIV/0!	#DIV/0!	#DIV/0!	#DIV/0!	#DIV/0!	#DIV/0!	0	0	0	0	0	0	#DIV/0!	#DIV/0!	#DIV/0!	#DIV/0!	#DIV/0!	#DIV/0!	#DIV/0!	0
						#DIV/0!		#DIV/0!															#DIV/0!	#DIV/0!	#DIV/0!	#DIV/0!	#DIV/0!	#DIV/0!	#DIV/0!	#DIV/0!	#DIV/0!	#DIV/0!	#DIV/0!	#DIV/0!	#DIV/0!	0	0	0	0	0	0	#DIV/0!	#DIV/0!	#DIV/0!	#DIV/0!	#DIV/0!	#DIV/0!	#DIV/0!	0
						#DIV/0!		#DIV/0!															#DIV/0!	#DIV/0!	#DIV/0!	#DIV/0!	#DIV/0!	#DIV/0!	#DIV/0!	#DIV/0!	#DIV/0!	#DIV/0!	#DIV/0!	#DIV/0!	#DIV/0!	0	0	0	0	0	0	#DIV/0!	#DIV/0!	#DIV/0!	#DIV/0!	#DIV/0!	#DIV/0!	#DIV/0!	0
						#DIV/0!		#DIV/0!															#DIV/0!	#DIV/0!	#DIV/0!	#DIV/0!	#DIV/0!	#DIV/0!	#DIV/0!	#DIV/0!	#DIV/0!	#DIV/0!	#DIV/0!	#DIV/0!	#DIV/0!	0	0	0	0	0	0	#DIV/0!	#DIV/0!	#DIV/0!	#DIV/0!	#DIV/0!	#DIV/0!	#DIV/0!	0
						#DIV/0!		#DIV/0!															#DIV/0!	#DIV/0!	#DIV/0!	#DIV/0!	#DIV/0!	#DIV/0!	#DIV/0!	#DIV/0!	#DIV/0!	#DIV/0!	#DIV/0!	#DIV/0!	#DIV/0!	0	0	0	0	0	0	#DIV/0!	#DIV/0!	#DIV/0!	#DIV/0!	#DIV/0!	#DIV/0!	#DIV/0!	0
						#DIV/0!		#DIV/0!															#DIV/0!	#DIV/0!	#DIV/0!	#DIV/0!	#DIV/0!	#DIV/0!	#DIV/0!	#DIV/0!	#DIV/0!	#DIV/0!	#DIV/0!	#DIV/0!	#DIV/0!	0	0	0	0	0	0	#DIV/0!	#DIV/0!	#DIV/0!	#DIV/0!	#DIV/0!	#DIV/0!	#DIV/0!	0
						#DIV/0!		#DIV/0!															#DIV/0!	#DIV/0!	#DIV/0!	#DIV/0!	#DIV/0!	#DIV/0!	#DIV/0!	#DIV/0!	#DIV/0!	#DIV/0!	#DIV/0!	#DIV/0!	#DIV/0!	0	0	0	0	0	0	#DIV/0!	#DIV/0!	#DIV/0!	#DIV/0!	#DIV/0!	#DIV/0!	#DIV/0!	0
						#DIV/0!		#DIV/0!															#DIV/0!	#DIV/0!	#DIV/0!	#DIV/0!	#DIV/0!	#DIV/0!	#DIV/0!	#DIV/0!	#DIV/0!	#DIV/0!	#DIV/0!	#DIV/0!	#DIV/0!	0	0	0	0	0	0	#DIV/0!	#DIV/0!	#DIV/0!	#DIV/0!	#DIV/0!	#DIV/0!	#DIV/0!	0
						#DIV/0!		#DIV/0!															#DIV/0!	#DIV/0!	#DIV/0!	#DIV/0!	#DIV/0!	#DIV/0!	#DIV/0!	#DIV/0!	#DIV/0!	#DIV/0!	#DIV/0!	#DIV/0!	#DIV/0!	0	0	0	0	0	0	#DIV/0!	#DIV/0!	#DIV/0!	#DIV/0!	#DIV/0!	#DIV/0!	#DIV/0!	0
						#DIV/0!		#DIV/0!															#DIV/0!	#DIV/0!	#DIV/0!	#DIV/0!	#DIV/0!	#DIV/0!	#DIV/0!	#DIV/0!	#DIV/0!	#DIV/0!	#DIV/0!	#DIV/0!	#DIV/0!	0	0	0	0	0	0	#DIV/0!	#DIV/0!	#DIV/0!	#DIV/0!	#DIV/0!	#DIV/0!	#DIV/0!	0
						#DIV/0!		#DIV/0!															#DIV/0!	#DIV/0!	#DIV/0!	#DIV/0!	#DIV/0!	#DIV/0!	#DIV/0!	#DIV/0!	#DIV/0!	#DIV/0!	#DIV/0!	#DIV/0!	#DIV/0!	0	0	0	0	0	0	#DIV/0!	#DIV/0!	#DIV/0!	#DIV/0!	#DIV/0!	#DIV/0!	#DIV/0!	0
						#DIV/0!		#DIV/0!															#DIV/0!	#DIV/0!	#DIV/0!	#DIV/0!	#DIV/0!	#DIV/0!	#DIV/0!	#DIV/0!	#DIV/0!	#DIV/0!	#DIV/0!	#DIV/0!	#DIV/0!	0	0	0	0	0	0	#DIV/0!	#DIV/0!	#DIV/0!	#DIV/0!	#DIV/0!	#DIV/0!	#DIV/0!	0
						#DIV/0!		#DIV/0!															#DIV/0!	#DIV/0!	#DIV/0!	#DIV/0!	#DIV/0!	#DIV/0!	#DIV/0!	#DIV/0!	#DIV/0!	#DIV/0!	#DIV/0!	#DIV/0!	#DIV/0!	0	0	0	0	0	0	#DIV/0!	#DIV/0!	#DIV/0!	#DIV/0!	#DIV/0!	#DIV/0!	#DIV/0!	0
						#DIV/0!		#DIV/0!															#DIV/0!	#DIV/0!	#DIV/0!	#DIV/0!	#DIV/0!	#DIV/0!	#DIV/0!	#DIV/0!	#DIV/0!	#DIV/0!	#DIV/0!	#DIV/0!	#DIV/0!	0	0	0	0	0	0	#DIV/0!	#DIV/0!	#DIV/0!	#DIV/0!	#DIV/0!	#DIV/0!	#DIV/0!	0
						#DIV/0!		#DIV/0!															#DIV/0!	#DIV/0!	#DIV/0!	#DIV/0!	#DIV/0!	#DIV/0!	#DIV/0!	#DIV/0!	#DIV/0!	#DIV/0!	#DIV/0!	#DIV/0!	#DIV/0!	0	0	0	0	0	0	#DIV/0!	#DIV/0!	#DIV/0!	#DIV/0!	#DIV/0!	#DIV/0!	#DIV/0!	0
						#DIV/0!		#DIV/0!															#DIV/0!	#DIV/0!	#DIV/0!	#DIV/0!	#DIV/0!	#DIV/0!	#DIV/0!	#DIV/0!	#DIV/0!	#DIV/0!	#DIV/0!	#DIV/0!	#DIV/0!	0	0	0	0	0	0	#DIV/0!	#DIV/0!	#DIV/0!	#DIV/0!	#DIV/0!	#DIV/0!	#DIV/0!	0
						#DIV/0!		#DIV/0!															#DIV/0!	#DIV/0!	#DIV/0!	#DIV/0!	#DIV/0!	#DIV/0!	#DIV/0!	#DIV/0!	#DIV/0!	#DIV/0!	#DIV/0!	#DIV/0!	#DIV/0!	0	0	0	0	0	0	#DIV/0!	#DIV/0!	#DIV/0!	#DIV/0!	#DIV/0!	#DIV/0!	#DIV/0!	0
						#DIV/0!		#DIV/0!															#DIV/0!	#DIV/0!	#DIV/0!	#DIV/0!	#DIV/0!	#DIV/0!	#DIV/0!	#DIV/0!	#DIV/0!	#DIV/0!	#DIV/0!	#DIV/0!	#DIV/0!	0	0	0	0	0	0	#DIV/0!	#DIV/0!	#DIV/0!	#DIV/0!	#DIV/0!	#DIV/0!	#DIV/0!	0
						#DIV/0!		#DIV/0!															#DIV/0!	#DIV/0!	#DIV/0!	#DIV/0!	#DIV/0!	#DIV/0!	#DIV/0!	#DIV/0!	#DIV/0!	#DIV/0!	#DIV/0!	#DIV/0!	#DIV/0!	0	0	0	0	0	0	#DIV/0!	#DIV/0!	#DIV/0!	#DIV/0!	#DIV/0!	#DIV/0!	#DIV/0!	0
						#DIV/0!		#DIV/0!															#DIV/0!	#DIV/0!	#DIV/0!	#DIV/0!	#DIV/0!	#DIV/0!	#DIV/0!	#DIV/0!	#DIV/0!	#DIV/0!	#DIV/0!	#DIV/0!	#DIV/0!	0	0	0	0	0	0	#DIV/0!	#DIV/0!	#DIV/0!	#DIV/0!	#DIV/0!	#DIV/0!	#DIV/0!	0
						#DIV/0!		#DIV/0!															#DIV/0!	#DIV/0!	#DIV/0!	#DIV/0!	#DIV/0!	#DIV/0!	#DIV/0!	#DIV/0!	#DIV/0!	#DIV/0!	#DIV/0!	#DIV/0!	#DIV/0!	0	0	0	0	0	0	#DIV/0!	#DIV/0!	#DIV/0!	#DIV/0!	#DIV/0!	#DIV/0!	#DIV/0!	0
						#DIV/0!		#DIV/0!															#DIV/0!	#DIV/0!	#DIV/0!	#DIV/0!	#DIV/0!	#DIV/0!	#DIV/0!	#DIV/0!	#DIV/0!	#DIV/0!	#DIV/0!	#DIV/0!	#DIV/0!	0	0	0	0	0	0	#DIV/0!	#DIV/0!	#DIV/0!	#DIV/0!	#DIV/0!	#DIV/0!	#DIV/0!	0
						#DIV/0!		#DIV/0!															#DIV/0!	#DIV/0!	#DIV/0!	#DIV/0!	#DIV/0!	#DIV/0!	#DIV/0!	#DIV/0!	#DIV/0!	#DIV/0!	#DIV/0!	#DIV/0!	#DIV/0!	0	0	0	0	0	0	#DIV/0!	#DIV/0!	#DIV/0!	#DIV/0!	#DIV/0!	#DIV/0!	#DIV/0!	0
						#DIV/0!		#DIV/0!															#DIV/0!	#DIV/0!	#DIV/0!	#DIV/0!	#DIV/0!	#DIV/0!	#DIV/0!	#DIV/0!	#DIV/0!	#DIV/0!	#DIV/0!	#DIV/0!	#DIV/0!	0	0	0	0	0	0	#DIV/0!	#DIV/0!	#DIV/0!	#DIV/0!	#DIV/0!	#DIV/0!	#DIV/0!	0
						#DIV/0!		#DIV/0!															#DIV/0!	#DIV/0!	#DIV/0!	#DIV/0!	#DIV/0!	#DIV/0!	#DIV/0!	#DIV/0!	#DIV/0!	#DIV/0!	#DIV/0!	#DIV/0!	#DIV/0!	0	0	0	0	0	0	#DIV/0!	#DIV/0!	#DIV/0!	#DIV/0!	#DIV/0!	#DIV/0!	#DIV/0!	0
						#DIV/0!		#DIV/0!															#DIV/0!	#DIV/0!	#DIV/0!	#DIV/0!	#DIV/0!	#DIV/0!	#DIV/0!	#DIV/0!	#DIV/0!	#DIV/0!	#DIV/0!	#DIV/0!	#DIV/0!	0	0	0	0	0	0	#DIV/0!	#DIV/0!	#DIV/0!	#DIV/0!	#DIV/0!	#DIV/0!	#DIV/0!	0
						#DIV/0!		#DIV/0!															#DIV/0!	#DIV/0!	#DIV/0!	#DIV/0!	#DIV/0!	#DIV/0!	#DIV/0!	#DIV/0!	#DIV/0!	#DIV/0!	#DIV/0!	#DIV/0!	#DIV/0!	0	0	0	0	0	0	#DIV/0!	#DIV/0!	#DIV/0!	#DIV/0!	#DIV/0!	#DIV/0!	#DIV/0!	0
						#DIV/0!		#DIV/0!															#DIV/0!	#DIV/0!	#DIV/0!	#DIV/0!	#DIV/0!	#DIV/0!	#DIV/0!	#DIV/0!	#DIV/0!	#DIV/0!	#DIV/0!	#DIV/0!	#DIV/0!	0	0	0	0	0	0	#DIV/0!	#DIV/0!	#DIV/0!	#DIV/0!	#DIV/0!	#DIV/0!	#DIV/0!	0
						#DIV/0!		#DIV/0!															#DIV/0!	#DIV/0!	#DIV/0!	#DIV/0!	#DIV/0!	#DIV/0!	#DIV/0!	#DIV/0!	#DIV/0!	#DIV/0!	#DIV/0!	#DIV/0!	#DIV/0!	0	0	0	0	0	0	#DIV/0!	#DIV/0!	#DIV/0!	#DIV/0!	#DIV/0!	#DIV/0!	#DIV/0!	0
						#DIV/0!		#DIV/0!															#DIV/0!	#DIV/0!	#DIV/0!	#DIV/0!	#DIV/0!	#DIV/0!	#DIV/0!	#DIV/0!	#DIV/0!	#DIV/0!	#DIV/0!	#DIV/0!	#DIV/0!	0	0	0	0	0	0	#DIV/0!	#DIV/0!	#DIV/0!	#DIV/0!	#DIV/0!	#DIV/0!	#DIV/0!	0
						#DIV/0!		#DIV/0!															#DIV/0!	#DIV/0!	#DIV/0!	#DIV/0!	#DIV/0!	#DIV/0!	#DIV/0!	#DIV/0!	#DIV/0!	#DIV/0!	#DIV/0!	#DIV/0!	#DIV/0!	0	0	0	0	0	0	#DIV/0!	#DIV/0!	#DIV/0!	#DIV/0!	#DIV/0!	#DIV/0!	#DIV/0!	0
						#DIV/0!		#DIV/0!															#DIV/0!	#DIV/0!	#DIV/0!	#DIV/0!	#DIV/0!	#DIV/0!	#DIV/0!	#DIV/0!	#DIV/0!	#DIV/0!	#DIV/0!	#DIV/0!	#DIV/0!	0	0	0	0	0	0	#DIV/0!	#DIV/0!	#DIV/0!	#DIV/0!	#DIV/0!	#DIV/0!	#DIV/0!	0
						#DIV/0!		#DIV/0!															#DIV/0!	#DIV/0!	#DIV/0!	#DIV/0!	#DIV/0!	#DIV/0!	#DIV/0!	#DIV/0!	#DIV/0!	#DIV/0!	#DIV/0!	#DIV/0!	#DIV/0!	0	0	0	0	0	0	#DIV/0!	#DIV/0!	#DIV/0!	#DIV/0!	#DIV/0!	#DIV/0!	#DIV/0!	0
						#DIV/0!		#DIV/0!															#DIV/0!	#DIV/0!	#DIV/0!	#DIV/0!	#DIV/0!	#DIV/0!	#DIV/0!	#DIV/0!	#DIV/0!	#DIV/0!	#DIV/0!	#DIV/0!	#DIV/0!	0	0	0	0	0	0	#DIV/0!	#DIV/0!	#DIV/0!	#DIV/0!	#DIV/0!	#DIV/0!	#DIV/0!	0
						#DIV/0!		#DIV/0!															#DIV/0!	#DIV/0!	#DIV/0!	#DIV/0!	#DIV/0!	#DIV/0!	#DIV/0!	#DIV/0!	#DIV/0!	#DIV/0!	#DIV/0!	#DIV/0!	#DIV/0!	0	0	0	0	0	0	#DIV/0!	#DIV/0!	#DIV/0!	#DIV/0!	#DIV/0!	#DIV/0!	#DIV/0!	0
						#DIV/0!		#DIV/0!															#DIV/0!	#DIV/0!	#DIV/0!	#DIV/0!	#DIV/0!	#DIV/0!	#DIV/0!	#DIV/0!	#DIV/0!	#DIV/0!	#DIV/0!	#DIV/0!	#DIV/0!	0	0	0	0	0	0	#DIV/0!	#DIV/0!	#DIV/0!	#DIV/0!	#DIV/0!	#DIV/0!	#DIV/0!	0
						#DIV/0!		#DIV/0!															#DIV/0!	#DIV/0!	#DIV/0!	#DIV/0!	#DIV/0!	#DIV/0!	#DIV/0!	#DIV/0!	#DIV/0!	#DIV/0!	#DIV/0!	#DIV/0!	#DIV/0!	0	0	0	0	0	0	#DIV/0!	#DIV/0!	#DIV/0!	#DIV/0!	#DIV/0!	#DIV/0!	#DIV/0!	0
						#DIV/0!		#DIV/0!															#DIV/0!	#DIV/0!	#DIV/0!	#DIV/0!	#DIV/0!	#DIV/0!	#DIV/0!	#DIV/0!	#DIV/0!	#DIV/0!	#DIV/0!	#DIV/0!	#DIV/0!	0	0	0	0	0	0	#DIV/0!	#DIV/0!	#DIV/0!	#DIV/0!	#DIV/0!	#DIV/0!	#DIV/0!	0
						#DIV/0!		#DIV/0!															#DIV/0!	#DIV/0!	#DIV/0!	#DIV/0!	#DIV/0!	#DIV/0!	#DIV/0!	#DIV/0!	#DIV/0!	#DIV/0!	#DIV/0!	#DIV/0!	#DIV/0!	0	0	0	0	0	0	#DIV/0!	#DIV/0!	#DIV/0!	#DIV/0!	#DIV/0!	#DIV/0!	#DIV/0!	0
						#DIV/0!		#DIV/0!															#DIV/0!	#DIV/0!	#DIV/0!	#DIV/0!	#DIV/0!	#DIV/0!	#DIV/0!	#DIV/0!	#DIV/0!	#DIV/0!	#DIV/0!	#DIV/0!	#DIV/0!	0	0	0	0	0	0	#DIV/0!	#DIV/0!	#DIV/0!	#DIV/0!	#DIV/0!	#DIV/0!	#DIV/0!	0
						#DIV/0!		#DIV/0!															#DIV/0!	#DIV/0!	#DIV/0!	#DIV/0!	#DIV/0!	#DIV/0!	#DIV/0!	#DIV/0!	#DIV/0!	#DIV/0!	#DIV/0!	#DIV/0!	#DIV/0!	0	0	0	0	0	0	#DIV/0!	#DIV/0!	#DIV/0!	#DIV/0!	#DIV/0!	#DIV/0!	#DIV/0!	0
						#DIV/0!		#DIV/0!															#DIV/0!	#DIV/0!	#DIV/0!	#DIV/0!	#DIV/0!	#DIV/0!	#DIV/0!	#DIV/0!	#DIV/0!	#DIV/0!	#DIV/0!	#DIV/0!	#DIV/0!	0	0	0	0	0	0	#DIV/0!	#DIV/0!	#DIV/0!	#DIV/0!	#DIV/0!	#DIV/0!	#DIV/0!	0
						#DIV/0!		#DIV/0!															#DIV/0!	#DIV/0!	#DIV/0!	#DIV/0!	#DIV/0!	#DIV/0!	#DIV/0!	#DIV/0!	#DIV/0!	#DIV/0!	#DIV/0!	#DIV/0!	#DIV/0!	0	0	0	0	0	0	#DIV/0!	#DIV/0!	#DIV/0!	#DIV/0!	#DIV/0!	#DIV/0!	#DIV/0!	0
						#DIV/0!		#DIV/0!															#DIV/0!	#DIV/0!	#DIV/0!	#DIV/0!	#DIV/0!	#DIV/0!	#DIV/0!	#DIV/0!	#DIV/0!	#DIV/0!	#DIV/0!	#DIV/0!	#DIV/0!	0	0	0	0	0	0	#DIV/0!	#DIV/0!	#DIV/0!	#DIV/0!	#DIV/0!	#DIV/0!	#DIV/0!	0
						#DIV/0!		#DIV/0!															#DIV/0!	#DIV/0!	#DIV/0!	#DIV/0!	#DIV/0!	#DIV/0!	#DIV/0!	#DIV/0!	#DIV/0!	#DIV/0!	#DIV/0!	#DIV/0!	#DIV/0!	0	0	0	0	0	0	#DIV/0!	#DIV/0!	#DIV/0!	#DIV/0!	#DIV/0!	#DIV/0!	#DIV/0!	0
						#DIV/0!		#DIV/0!															#DIV/0!	#DIV/0!	#DIV/0!	#DIV/0!	#DIV/0!	#DIV/0!	#DIV/0!	#DIV/0!	#DIV/0!	#DIV/0!	#DIV/0!	#DIV/0!	#DIV/0!	0	0	0	0	0	0	#DIV/0!	#DIV/0!	#DIV/0!	#DIV/0!	#DIV/0!	#DIV/0!	#DIV/0!	0
						#DIV/0!		#DIV/0!															#DIV/0!	#DIV/0!	#DIV/0!	#DIV/0!	#DIV/0!	#DIV/0!	#DIV/0!	#DIV/0!	#DIV/0!	#DIV/0!	#DIV/0!	#DIV/0!	#DIV/0!	0	0	0	0	0	0	#DIV/0!	#DIV/0!	#DIV/0!	#DIV/0!	#DIV/0!	#DIV/0!	#DIV/0!	0
						#DIV/0!		#DIV/0!															#DIV/0!	#DIV/0!	#DIV/0!	#DIV/0!	#DIV/0!	#DIV/0!	#DIV/0!	#DIV/0!	#DIV/0!	#DIV/0!	#DIV/0!	#DIV/0!	#DIV/0!	0	0	0	0	0	0	#DIV/0!	#DIV/0!	#DIV/0!	#DIV/0!	#DIV/0!	#DIV/0!	#DIV/0!	0
						#DIV/0!		#DIV/0!															#DIV/0!	#DIV/0!	#DIV/0!	#DIV/0!	#DIV/0!	#DIV/0!	#DIV/0!	#DIV/0!	#DIV/0!	#DIV/0!	#DIV/0!	#DIV/0!	#DIV/0!	0	0	0	0	0	0	#DIV/0!	#DIV/0!	#DIV/0!	#DIV/0!	#DIV/0!	#DIV/0!	#DIV/0!	0
						#DIV/0!		#DIV/0!															#DIV/0!	#DIV/0!	#DIV/0!	#DIV/0!	#DIV/0!	#DIV/0!	#DIV/0!	#DIV/0!	#DIV/0!	#DIV/0!	#DIV/0!	#DIV/0!	#DIV/0!	0	0	0	0	0	0	#DIV/0!	#DIV/0!	#DIV/0!	#DIV/0!	#DIV/0!	#DIV/0!	#DIV/0!	0
						#DIV/0!		#DIV/0!															#DIV/0!	#DIV/0!	#DIV/0!	#DIV/0!	#DIV/0!	#DIV/0!	#DIV/0!	#DIV/0!	#DIV/0!	#DIV/0!	#DIV/0!	#DIV/0!	#DIV/0!	0	0	0	0	0	0	#DIV/0!	#DIV/0!	#DIV/0!	#DIV/0!	#DIV/0!	#DIV/0!	#DIV/0!	0
						#DIV/0!		#DIV/0!															#DIV/0!	#DIV/0!	#DIV/0!	#DIV/0!	#DIV/0!	#DIV/0!	#DIV/0!	#DIV/0!	#DIV/0!	#DIV/0!	#DIV/0!	#DIV/0!	#DIV/0!	0	0	0	0	0	0	#DIV/0!	#DIV/0!	#DIV/0!	#DIV/0!	#DIV/0!	#DIV/0!	#DIV/0!	0
						#DIV/0!		#DIV/0!															#DIV/0!	#DIV/0!	#DIV/0!	#DIV/0!	#DIV/0!	#DIV/0!	#DIV/0!	#DIV/0!	#DIV/0!	#DIV/0!	#DIV/0!	#DIV/0!	#DIV/0!	0	0	0	0	0	0	#DIV/0!	#DIV/0!	#DIV/0!	#DIV/0!	#DIV/0!	#DIV/0!	#DIV/0!	0
						#DIV/0!		#DIV/0!															#DIV/0!	#DIV/0!	#DIV/0!	#DIV/0!	#DIV/0!	#DIV/0!	#DIV/0!	#DIV/0!	#DIV/0!	#DIV/0!	#DIV/0!	#DIV/0!	#DIV/0!	0	0	0	0	0	0	#DIV/0!	#DIV/0!	#DIV/0!	#DIV/0!	#DIV/0!	#DIV/0!	#DIV/0!	0
						#DIV/0!		#DIV/0!															#DIV/0!	#DIV/0!	#DIV/0!	#DIV/0!	#DIV/0!	#DIV/0!	#DIV/0!	#DIV/0!	#DIV/0!	#DIV/0!	#DIV/0!	#DIV/0!	#DIV/0!	0	0	0	0	0	0	#DIV/0!	#DIV/0!	#DIV/0!	#DIV/0!	#DIV/0!	#DIV/0!	#DIV/0!	0
						#DIV/0!		#DIV/0!															#DIV/0!	#DIV/0!	#DIV/0!	#DIV/0!	#DIV/0!	#DIV/0!	#DIV/0!	#DIV/0!	#DIV/0!	#DIV/0!	#DIV/0!	#DIV/0!	#DIV/0!	0	0	0	0	0	0	#DIV/0!	#DIV/0!	#DIV/0!	#DIV/0!	#DIV/0!	#DIV/0!	#DIV/0!	0
						#DIV/0!		#DIV/0!															#DIV/0!	#DIV/0!	#DIV/0!	#DIV/0!	#DIV/0!	#DIV/0!	#DIV/0!	#DIV/0!	#DIV/0!	#DIV/0!	#DIV/0!	#DIV/0!	#DIV/0!	0	0	0	0	0	0	#DIV/0!	#DIV/0!	#DIV/0!	#DIV/0!	#DIV/0!	#DIV/0!	#DIV/0!	0
						#DIV/0!		#DIV/0!															#DIV/0!	#DIV/0!	#DIV/0!	#DIV/0!	#DIV/0!	#DIV/0!	#DIV/0!	#DIV/0!	#DIV/0!	#DIV/0!	#DIV/0!	#DIV/0!	#DIV/0!	0	0	0	0	0	0	#DIV/0!	#DIV/0!	#DIV/0!	#DIV/0!	#DIV/0!	#DIV/0!	#DIV/0!	0
						#DIV/0!		#DIV/0!															#DIV/0!	#DIV/0!	#DIV/0!	#DIV/0!	#DIV/0!	#DIV/0!	#DIV/0!	#DIV/0!	#DIV/0!	#DIV/0!	#DIV/0!	#DIV/0!	#DIV/0!	0	0	0	0	0	0	#DIV/0!	#DIV/0!	#DIV/0!	#DIV/0!	#DIV/0!	#DIV/0!	#DIV/0!	0
						#DIV/0!		#DIV/0!															#DIV/0!	#DIV/0!	#DIV/0!	#DIV/0!	#DIV/0!	#DIV/0!	#DIV/0!	#DIV/0!	#DIV/0!	#DIV/0!	#DIV/0!	#DIV/0!	#DIV/0!	0	0	0	0	0	0	#DIV/0!	#DIV/0!	#DIV/0!	#DIV/0!	#DIV/0!	#DIV/0!	#DIV/0!	0
						#DIV/0!		#DIV/0!															#DIV/0!	#DIV/0!	#DIV/0!	#DIV/0!	#DIV/0!	#DIV/0!	#DIV/0!	#DIV/0!	#DIV/0!	#DIV/0!	#DIV/0!	#DIV/0!	#DIV/0!	0	0	0	0	0	0	#DIV/0!	#DIV/0!	#DIV/0!	#DIV/0!	#DIV/0!	#DIV/0!	#DIV/0!	0
						#DIV/0!		#DIV/0!															#DIV/0!	#DIV/0!	#DIV/0!	#DIV/0!	#DIV/0!	#DIV/0!	#DIV/0!	#DIV/0!	#DIV/0!	#DIV/0!	#DIV/0!	#DIV/0!	#DIV/0!	0	0	0	0	0	0	#DIV/0!	#DIV/0!	#DIV/0!	#DIV/0!	#DIV/0!	#DIV/0!	#DIV/0!	0
						#DIV/0!		#DIV/0!															#DIV/0!	#DIV/0!	#DIV/0!	#DIV/0!	#DIV/0!	#DIV/0!	#DIV/0!	#DIV/0!	#DIV/0!	#DIV/0!	#DIV/0!	#DIV/0!	#DIV/0!	0	0	0	0	0	0	#DIV/0!	#DIV/0!	#DIV/0!	#DIV/0!	#DIV/0!	#DIV/0!	#DIV/0!	0
						#DIV/0!		#DIV/0!															#DIV/0!	#DIV/0!	#DIV/0!	#DIV/0!	#DIV/0!	#DIV/0!	#DIV/0!	#DIV/0!	#DIV/0!	#DIV/0!	#DIV/0!	#DIV/0!	#DIV/0!	0	0	0	0	0	0	#DIV/0!	#DIV/0!	#DIV/0!	#DIV/0!	#DIV/0!	#DIV/0!	#DIV/0!	0
						#DIV/0!		#DIV/0!															#DIV/0!	#DIV/0!	#DIV/0!	#DIV/0!	#DIV/0!	#DIV/0!	#DIV/0!	#DIV/0!	#DIV/0!	#DIV/0!	#DIV/0!	#DIV/0!	#DIV/0!	0	0	0	0	0	0	#DIV/0!	#DIV/0!	#DIV/0!	#DIV/0!	#DIV/0!	#DIV/0!	#DIV/0!	0
						#DIV/0!		#DIV/0!															#DIV/0!	#DIV/0!	#DIV/0!	#DIV/0!	#DIV/0!	#DIV/0!	#DIV/0!	#DIV/0!	#DIV/0!	#DIV/0!	#DIV/0!	#DIV/0!	#DIV/0!	0	0	0	0	0	0	#DIV/0!	#DIV/0!	#DIV/0!	#DIV/0!	#DIV/0!	#DIV/0!	#DIV/0!	0
						#DIV/0!		#DIV/0!															#DIV/0!	#DIV/0!	#DIV/0!	#DIV/0!	#DIV/0!	#DIV/0!	#DIV/0!	#DIV/0!	#DIV/0!	#DIV/0!	#DIV/0!	#DIV/0!	#DIV/0!	0	0	0	0	0	0	#DIV/0!	#DIV/0!	#DIV/0!	#DIV/0!	#DIV/0!	#DIV/0!	#DIV/0!	0
						#DIV/0!		#DIV/0!															#DIV/0!	#DIV/0!	#DIV/0!	#DIV/0!	#DIV/0!	#DIV/0!	#DIV/0!	#DIV/0!	#DIV/0!	#DIV/0!	#DIV/0!	#DIV/0!	#DIV/0!	0	0	0	0	0	0	#DIV/0!	#DIV/0!	#DIV/0!	#DIV/0!	#DIV/0!	#DIV/0!	#DIV/0!	0
						#DIV/0!		#DIV/0!															#DIV/0!	#DIV/0!	#DIV/0!	#DIV/0!	#DIV/0!	#DIV/0!	#DIV/0!	#DIV/0!	#DIV/0!	#DIV/0!	#DIV/0!	#DIV/0!	#DIV/0!	0	0	0	0	0	0	#DIV/0!	#DIV/0!	#DIV/0!	#DIV/0!	#DIV/0!	#DIV/0!	#DIV/0!	0
						#DIV/0!		#DIV/0!															#DIV/0!	#DIV/0!	#DIV/0!	#DIV/0!	#DIV/0!	#DIV/0!	#DIV/0!	#DIV/0!	#DIV/0!	#DIV/0!	#DIV/0!	#DIV/0!	#DIV/0!	0	0	0	0	0	0	#DIV/0!	#DIV/0!	#DIV/0!	#DIV/0!	#DIV/0!	#DIV/0!	#DIV/0!	0
						#DIV/0!		#DIV/0!															#DIV/0!	#DIV/0!	#DIV/0!	#DIV/0!	#DIV/0!	#DIV/0!	#DIV/0!	#DIV/0!	#DIV/0!	#DIV/0!	#DIV/0!	#DIV/0!	#DIV/0!	0	0	0	0	0	0	#DIV/0!	#DIV/0!	#DIV/0!	#DIV/0!	#DIV/0!	#DIV/0!	#DIV/0!	0
						#DIV/0!		#DIV/0!															#DIV/0!	#DIV/0!	#DIV/0!	#DIV/0!	#DIV/0!	#DIV/0!	#DIV/0!	#DIV/0!	#DIV/0!	#DIV/0!	#DIV/0!	#DIV/0!	#DIV/0!	0	0	0	0	0	0	#DIV/0!	#DIV/0!	#DIV/0!	#DIV/0!	#DIV/0!	#DIV/0!	#DIV/0!	0
						#DIV/0!		#DIV/0!															#DIV/0!	#DIV/0!	#DIV/0!	#DIV/0!	#DIV/0!	#DIV/0!	#DIV/0!	#DIV/0!	#DIV/0!	#DIV/0!	#DIV/0!	#DIV/0!	#DIV/0!	0	0	0	0	0	0	#DIV/0!	#DIV/0!	#DIV/0!	#DIV/0!	#DIV/0!	#DIV/0!	#DIV/0!	0
						#DIV/0!		#DIV/0!															#DIV/0!	#DIV/0!	#DIV/0!	#DIV/0!	#DIV/0!	#DIV/0!	#DIV/0!	#DIV/0!	#DIV/0!	#DIV/0!	#DIV/0!	#DIV/0!	#DIV/0!	0	0	0	0	0	0	#DIV/0!	#DIV/0!	#DIV/0!	#DIV/0!	#DIV/0!	#DIV/0!	#DIV/0!	0
						#DIV/0!		#DIV/0!															#DIV/0!	#DIV/0!	#DIV/0!	#DIV/0!	#DIV/0!	#DIV/0!	#DIV/0!	#DIV/0!	#DIV/0!	#DIV/0!	#DIV/0!	#DIV/0!	#DIV/0!	0	0	0	0	0	0	#DIV/0!	#DIV/0!	#DIV/0!	#DIV/0!	#DIV/0!	#DIV/0!	#DIV/0!	0
						#DIV/0!		#DIV/0!															#DIV/0!	#DIV/0!	#DIV/0!	#DIV/0!	#DIV/0!	#DIV/0!	#DIV/0!	#DIV/0!	#DIV/0!	#DIV/0!	#DIV/0!	#DIV/0!	#DIV/0!	0	0	0	0	0	0	#DIV/0!	#DIV/0!	#DIV/0!	#DIV/0!	#DIV/0!	#DIV/0!	#DIV/0!	0
						#DIV/0!		#DIV/0!															#DIV/0!	#DIV/0!	#DIV/0!	#DIV/0!	#DIV/0!	#DIV/0!	#DIV/0!	#DIV/0!	#DIV/0!	#DIV/0!	#DIV/0!	#DIV/0!	#DIV/0!	0	0	0	0	0	0	#DIV/0!	#DIV/0!	#DIV/0!	#DIV/0!	#DIV/0!	#DIV/0!	#DIV/0!	0
						#DIV/0!		#DIV/0!															#DIV/0!	#DIV/0!	#DIV/0!	#DIV/0!	#DIV/0!	#DIV/0!	#DIV/0!	#DIV/0!	#DIV/0!	#DIV/0!	#DIV/0!	#DIV/0!	#DIV/0!	0	0	0	0	0	0	#DIV/0!	#DIV/0!	#DIV/0!	#DIV/0!	#DIV/0!	#DIV/0!	#DIV/0!	0
						#DIV/0!		#DIV/0!															#DIV/0!	#DIV/0!	#DIV/0!	#DIV/0!	#DIV/0!	#DIV/0!	#DIV/0!	#DIV/0!	#DIV/0!	#DIV/0!	#DIV/0!	#DIV/0!	#DIV/0!	0	0	0	0	0	0	#DIV/0!	#DIV/0!	#DIV/0!	#DIV/0!	#DIV/0!	#DIV/0!	#DIV/0!	0
						#DIV/0!		#DIV/0!															#DIV/0!	#DIV/0!	#DIV/0!	#DIV/0!	#DIV/0!	#DIV/0!	#DIV/0!	#DIV/0!	#DIV/0!	#DIV/0!	#DIV/0!	#DIV/0!	#DIV/0!	0	0	0	0	0	0	#DIV/0!	#DIV/0!	#DIV/0!	#DIV/0!	#DIV/0!	#DIV/0!	#DIV/0!	0
						#DIV/0!		#DIV/0!															#DIV/0!	#DIV/0!	#DIV/0!	#DIV/0!	#DIV/0!	#DIV/0!	#DIV/0!	#DIV/0!	#DIV/0!	#DIV/0!	#DIV/0!	#DIV/0!	#DIV/0!	0	0	0	0	0	0	#DIV/0!	#DIV/0!	#DIV/0!	#DIV/0!	#DIV/0!	#DIV/0!	#DIV/0!	0
						#DIV/0!		#DIV/0!															#DIV/0!	#DIV/0!	#DIV/0!	#DIV/0!	#DIV/0!	#DIV/0!	#DIV/0!	#DIV/0!	#DIV/0!	#DIV/0!	#DIV/0!	#DIV/0!	#DIV/0!	0	0	0	0	0	0	#DIV/0!	#DIV/0!	#DIV/0!	#DIV/0!	#DIV/0!	#DIV/0!	#DIV/0!	0
						#DIV/0!		#DIV/0!															#DIV/0!	#DIV/0!	#DIV/0!	#DIV/0!	#DIV/0!	#DIV/0!	#DIV/0!	#DIV/0!	#DIV/0!	#DIV/0!	#DIV/0!	#DIV/0!	#DIV/0!	0	0	0	0	0	0	#DIV/0!	#DIV/0!	#DIV/0!	#DIV/0!	#DIV/0!	#DIV/0!	#DIV/0!	0
						#DIV/0!		#DIV/0!															#DIV/0!	#DIV/0!	#DIV/0!	#DIV/0!	#DIV/0!	#DIV/0!	#DIV/0!	#DIV/0!	#DIV/0!	#DIV/0!	#DIV/0!	#DIV/0!	#DIV/0!	0	0	0	0	0	0	#DIV/0!	#DIV/0!	#DIV/0!	#DIV/0!	#DIV/0!	#DIV/0!	#DIV/0!	0
						#DIV/0!		#DIV/0!															#DIV/0!	#DIV/0!	#DIV/0!	#DIV/0!	#DIV/0!	#DIV/0!	#DIV/0!	#DIV/0!	#DIV/0!	#DIV/0!	#DIV/0!	#DIV/0!	#DIV/0!	0	0	0	0	0	0	#DIV/0!	#DIV/0!	#DIV/0!	#DIV/0!	#DIV/0!	#DIV/0!	#DIV/0!	0
						#DIV/0!		#DIV/0!															#DIV/0!	#DIV/0!	#DIV/0!	#DIV/0!	#DIV/0!	#DIV/0!	#DIV/0!	#DIV/0!	#DIV/0!	#DIV/0!	#DIV/0!	#DIV/0!	#DIV/0!	0	0	0	0	0	0	#DIV/0!	#DIV/0!	#DIV/0!	#DIV/0!	#DIV/0!	#DIV/0!	#DIV/0!	0
						#DIV/0!		#DIV/0!															#DIV/0!	#DIV/0!	#DIV/0!	#DIV/0!	#DIV/0!	#DIV/0!	#DIV/0!	#DIV/0!	#DIV/0!	#DIV/0!	#DIV/0!	#DIV/0!	#DIV/0!	0	0	0	0	0	0	#DIV/0!	#DIV/0!	#DIV/0!	#DIV/0!	#DIV/0!	#DIV/0!	#DIV/0!	0
						#DIV/0!		#DIV/0!															#DIV/0!	#DIV/0!	#DIV/0!	#DIV/0!	#DIV/0!	#DIV/0!	#DIV/0!	#DIV/0!	#DIV/0!	#DIV/0!	#DIV/0!	#DIV/0!	#DIV/0!	0	0	0	0	0	0	#DIV/0!	#DIV/0!	#DIV/0!	#DIV/0!	#DIV/0!	#DIV/0!	#DIV/0!	0
						#DIV/0!		#DIV/0!															#DIV/0!	#DIV/0!	#DIV/0!	#DIV/0!	#DIV/0!	#DIV/0!	#DIV/0!	#DIV/0!	#DIV/0!	#DIV/0!	#DIV/0!	#DIV/0!	#DIV/0!	0	0	0	0	0	0	#DIV/0!	#DIV/0!	#DIV/0!	#DIV/0!	#DIV/0!	#DIV/0!	#DIV/0!	0
						#DIV/0!		#DIV/0!															#DIV/0!	#DIV/0!	#DIV/0!	#DIV/0!	#DIV/0!	#DIV/0!	#DIV/0!	#DIV/0!	#DIV/0!	#DIV/0!	#DIV/0!	#DIV/0!	#DIV/0!	0	0	0	0	0	0	#DIV/0!	#DIV/0!	#DIV/0!	#DIV/0!	#DIV/0!	#DIV/0!	#DIV/0!	0
						#DIV/0!		#DIV/0!															#DIV/0!	#DIV/0!	#DIV/0!	#DIV/0!	#DIV/0!	#DIV/0!	#DIV/0!	#DIV/0!	#DIV/0!	#DIV/0!	#DIV/0!	#DIV/0!	#DIV/0!	0	0	0	0	0	0	#DIV/0!	#DIV/0!	#DIV/0!	#DIV/0!	#DIV/0!	#DIV/0!	#DIV/0!	0
						#DIV/0!		#DIV/0!															#DIV/0!	#DIV/0!	#DIV/0!	#DIV/0!	#DIV/0!	#DIV/0!	#DIV/0!	#DIV/0!	#DIV/0!	#DIV/0!	#DIV/0!	#DIV/0!	#DIV/0!	0	0	0	0	0	0	#DIV/0!	#DIV/0!	#DIV/0!	#DIV/0!	#DIV/0!	#DIV/0!	#DIV/0!	0
						#DIV/0!		#DIV/0!															#DIV/0!	#DIV/0!	#DIV/0!	#DIV/0!	#DIV/0!	#DIV/0!	#DIV/0!	#DIV/0!	#DIV/0!	#DIV/0!	#DIV/0!	#DIV/0!	#DIV/0!	0	0	0	0	0	0	#DIV/0!	#DIV/0!	#DIV/0!	#DIV/0!	#DIV/0!	#DIV/0!	#DIV/0!	0
						#DIV/0!		#DIV/0!															#DIV/0!	#DIV/0!	#DIV/0!	#DIV/0!	#DIV/0!	#DIV/0!	#DIV/0!	#DIV/0!	#DIV/0!	#DIV/0!	#DIV/0!	#DIV/0!	#DIV/0!	0	0	0	0	0	0	#DIV/0!	#DIV/0!	#DIV/0!	#DIV/0!	#DIV/0!	#DIV/0!	#DIV/0!	0
						#DIV/0!		#DIV/0!															#DIV/0!	#DIV/0!	#DIV/0!	#DIV/0!	#DIV/0!	#DIV/0!	#DIV/0!	#DIV/0!	#DIV/0!	#DIV/0!	#DIV/0!	#DIV/0!	#DIV/0!	0	0	0	0	0	0	#DIV/0!	#DIV/0!	#DIV/0!	#DIV/0!	#DIV/0!	#DIV/0!	#DIV/0!	0
						#DIV/0!		#DIV/0!															#DIV/0!	#DIV/0!	#DIV/0!	#DIV/0!	#DIV/0!	#DIV/0!	#DIV/0!	#DIV/0!	#DIV/0!	#DIV/0!	#DIV/0!	#DIV/0!	#DIV/0!	0	0	0	0	0	0	#DIV/0!	#DIV/0!	#DIV/0!	#DIV/0!	#DIV/0!	#DIV/0!	#DIV/0!	0
						#DIV/0!		#DIV/0!															#DIV/0!	#DIV/0!	#DIV/0!	#DIV/0!	#DIV/0!	#DIV/0!	#DIV/0!	#DIV/0!	#DIV/0!	#DIV/0!	#DIV/0!	#DIV/0!	#DIV/0!	0	0	0	0	0	0	#DIV/0!	#DIV/0!	#DIV/0!	#DIV/0!	#DIV/0!	#DIV/0!	#DIV/0!	0
						#DIV/0!		#DIV/0!															#DIV/0!	#DIV/0!	#DIV/0!	#DIV/0!	#DIV/0!	#DIV/0!	#DIV/0!	#DIV/0!	#DIV/0!	#DIV/0!	#DIV/0!	#DIV/0!	#DIV/0!	0	0	0	0	0	0	#DIV/0!	#DIV/0!	#DIV/0!	#DIV/0!	#DIV/0!	#DIV/0!	#DIV/0!	0
						#DIV/0!		#DIV/0!															#DIV/0!	#DIV/0!	#DIV/0!	#DIV/0!	#DIV/0!	#DIV/0!	#DIV/0!	#DIV/0!	#DIV/0!	#DIV/0!	#DIV/0!	#DIV/0!	#DIV/0!	0	0	0	0	0	0	#DIV/0!	#DIV/0!	#DIV/0!	#DIV/0!	#DIV/0!	#DIV/0!	#DIV/0!	0
						#DIV/0!		#DIV/0!															#DIV/0!	#DIV/0!	#DIV/0!	#DIV/0!	#DIV/0!	#DIV/0!	#DIV/0!	#DIV/0!	#DIV/0!	#DIV/0!	#DIV/0!	#DIV/0!	#DIV/0!	0	0	0	0	0	0	#DIV/0!	#DIV/0!	#DIV/0!	#DIV/0!	#DIV/0!	#DIV/0!	#DIV/0!	0
						#DIV/0!		#DIV/0!															#DIV/0!	#DIV/0!	#DIV/0!	#DIV/0!	#DIV/0!	#DIV/0!	#DIV/0!	#DIV/0!	#DIV/0!	#DIV/0!	#DIV/0!	#DIV/0!	#DIV/0!	0	0	0	0	0	0	#DIV/0!	#DIV/0!	#DIV/0!	#DIV/0!	#DIV/0!	#DIV/0!	#DIV/0!	0
						#DIV/0!		#DIV/0!															#DIV/0!	#DIV/0!	#DIV/0!	#DIV/0!	#DIV/0!	#DIV/0!	#DIV/0!	#DIV/0!	#DIV/0!	#DIV/0!	#DIV/0!	#DIV/0!	#DIV/0!	0	0	0	0	0	0	#DIV/0!	#DIV/0!	#DIV/0!	#DIV/0!	#DIV/0!	#DIV/0!	#DIV/0!	0
						#DIV/0!		#DIV/0!															#DIV/0!	#DIV/0!	#DIV/0!	#DIV/0!	#DIV/0!	#DIV/0!	#DIV/0!	#DIV/0!	#DIV/0!	#DIV/0!	#DIV/0!	#DIV/0!	#DIV/0!	0	0	0	0	0	0	#DIV/0!	#DIV/0!	#DIV/0!	#DIV/0!	#DIV/0!	#DIV/0!	#DIV/0!	0
						#DIV/0!		#DIV/0!															#DIV/0!	#DIV/0!	#DIV/0!	#DIV/0!	#DIV/0!	#DIV/0!	#DIV/0!	#DIV/0!	#DIV/0!	#DIV/0!	#DIV/0!	#DIV/0!	#DIV/0!	0	0	0	0	0	0	#DIV/0!	#DIV/0!	#DIV/0!	#DIV/0!	#DIV/0!	#DIV/0!	#DIV/0!	0
						#DIV/0!		#DIV/0!															#DIV/0!	#DIV/0!	#DIV/0!	#DIV/0!	#DIV/0!	#DIV/0!	#DIV/0!	#DIV/0!	#DIV/0!	#DIV/0!	#DIV/0!	#DIV/0!	#DIV/0!	0	0	0	0	0	0	#DIV/0!	#DIV/0!	#DIV/0!	#DIV/0!	#DIV/0!	#DIV/0!	#DIV/0!	0
						#DIV/0!		#DIV/0!															#DIV/0!	#DIV/0!	#DIV/0!	#DIV/0!	#DIV/0!	#DIV/0!	#DIV/0!	#DIV/0!	#DIV/0!	#DIV/0!	#DIV/0!	#DIV/0!	#DIV/0!	0	0	0	0	0	0	#DIV/0!	#DIV/0!	#DIV/0!	#DIV/0!	#DIV/0!	#DIV/0!	#DIV/0!	0
[truncated: 23 more rows]
[truncated: 33 more columns]

## Sheet: Site7
Date:	2001-07-02
Site No. :	2v34
										Transect for
			Width (m)	Length (m)	Area (ha)					Width (m)	Length (m)	Area (ha)
	Transect Dimensions:		7	50	0.035							0
[truncated: 383 more rows]
[truncated: 33 more columns]

## Sheet: Site8
Date:	2001-08-02
[truncated: 317 more rows]
[truncated: 33 more columns]
