# Supplementary material for: Emergent trees in Colophospermum mopane woodland: influence of elephant density on persistence versus attrition
Source: PeerJ. 2024 Feb 26;12:e16961. doi: 10.7717/peerj.16961 (PMC10903334; doi:10.7717/peerj.16961)
Supplement: Data S13 — All the raw shrub data of Malilangwe in 2014 to be taken together with that for Malilangwe in 2001 and Gonarezhou in 2014 for the derivation of figure 2. [file peerj-12-16961-s016.xlsx]

## Sheet: Site1
Date:	16/8/2014
Site No. :	1v23
			Width (m)	Length (m)	Area (ha)			Length (m)
	Transect Dimensions:		10	50	0.05
	Co-ordinates:			X	Y			X
			NW Corner
			SW Corner
			NE Corner
			SE Corner
									OED		OUD	NED		NUD	NFD	OFD	OBE	OBU	NBE	NBU	RE	Notes	Canopy volume (m3)																				Damage
Trans. No.	Sp. Code	Coppice	Height (m)	D1 (m)	D2 (m)	R	Shape	Adj. shape	Score	Eaten		Score	Eaten										Total	0.5	1	2	3	4	5	0.5	1	2	3	4	5	OED	OUD	NED	NUD	NFD	OFD	Old Rec. Vol.	OED	OUD	NED	NUD	NFD	OFD	Sp. Code
1	Gre bic	T	1.5	2.74	3.14	1.47	3	3	2		4												3.39094	2.38622	3.26535	3.51653	6.78188	19.0897	46.4684	2.38622	3.26535	3.39094	3.39094	3.39094	3.39094	18	63	0	0	0	0	17.847	321.247	1124.36	0	0	0	0	Gre bic
1	Mae par	T	0.95	1	0.88	0.47	3	3															0.21954	0.196206	0.219572	0.515962	2.42553	7.48465	17.2297	0.196206	0.21954	0.21954	0.21954	0.21954	0.21954	0	0	0	0	0	0	0.21954	0	0	0	0	0	0	Mae par
1	Mae par	T	0.2	0.6	0.52	0.28	2	2															0.0164036	0.256307	2.05045	16.4036	55.3623	131.229	256.307	0.0164036	0.0164036	0.0164036	0.0164036	0.0164036	0.0164036	0	0	0	0	0	0	0.0164036	0	0	0	0	0	0	Mae par
1	Gre bic	T	1.8	2.41	1.9	1.0775	3	3	2														2.18626	1.36266	1.99432	2.18926	2.83404	6.1779	14.4701	1.36266	1.99432	2.18626	2.18626	2.18626	2.18626	18	0	0	0	0	0	2.66617	47.991	0	0	0	0	0	Gre bic
1	Mae par	T	0.5	0.62	0.51	0.2825	3	3															0.0417447	0.0417447	0.0834893	1.16885	5.25983	14.3602	30.4736	0.0417447	0.0417447	0.0417447	0.0417447	0.0417447	0.0417447	0	0	0	0	0	0	0.0417447	0	0	0	0	0	0	Mae par
1	Gre bic	T	1.8	1.32	1.61	0.7325	3	3	4														1.01037	0.629751	0.921671	1.01176	1.30974	2.8551	6.68731	0.629751	0.921671	1.01037	1.01037	1.01037	1.01037	63	0	0	0	0	0	2.73074	172.037	0	0	0	0	0	Gre bic
1	Gre bic	T	1.7	2.22	2.53	1.1875	3	3	3														2.5079	1.62582	2.33281	2.52168	3.62939	8.71869	20.8524	1.62582	2.33281	2.5079	2.5079	2.5079	2.5079	38	0	0	0	0	0	4.045	153.71	0	0	0	0	0	Gre bic
1	Gre bic	T	1.7	2.46	2.32	1.195	3	3	2														2.53968	1.64642	2.36237	2.55364	3.67538	8.82917	21.1166	1.64642	2.36237	2.53968	2.53968	2.53968	2.53968	18	0	0	0	0	0	3.09717	55.7491	0	0	0	0	0	Gre bic
1	Cis cor	T	1.1	1.46	1.41	0.7175	3	3															0.592421	0.496281	0.591976	0.916895	3.64533	11.4478	26.995	0.496281	0.591976	0.592421	0.592421	0.592421	0.592421	0	0	0	0	0	0	0.592421	0	0	0	0	0	0	Cis cor
1	Ere amo	T	0.95	0.9	1.4	0.575	3	3			2												0.328589	0.293666	0.328637	0.772249	3.63034	11.2024	25.788	0.293666	0.328589	0.328589	0.328589	0.328589	0.328589	0	18	0	0	0	0	0.400719	0	7.21294	0	0	0	0	Ere amo
1	Mae par	T	0.9	0.71	1.1	0.4525	7	7			1												0.481715	0.321445	0.466468	-2.62909	-15.4695	-44.3318	-95.4927	0.321445	0.481715	0.481715	0.481715	0.481715	0.481715	0	5.5	0	0	0	0	0.509752	0	2.80363	0	0	0	0	Mae par
1	Gre bic	T	1.8	2.74	3.66	1.6	3	3	1		1	1											4.82066	3.00465	4.39745	4.82727	6.249	13.6222	31.9063	3.00465	4.39745	4.82066	4.82066	4.82066	4.82066	5.5	5.5	5.5	0	0	0	5.41647	29.7906	29.7906	28.0568	0	0	0	Gre bic
1	Mae par	T	0.7	0.61	0.75	0.34	1	1															0.254218	0.181584	0.363168	0.726336	1.0895	1.45267	1.81584	0.181584	0.254218	0.254218	0.254218	0.254218	0.254218	0	0	0	0	0	0	0.254218	0	0	0	0	0	0	Mae par
1	Gre bic	T	2	3	3.1	1.525	3	3	4														4.86591	2.8131	4.25767	4.86591	5.47415	9.73181	21.2883	2.8131	4.25767	4.86591	4.86591	4.86591	4.86591	63	0	0	0	0	0	13.1511	828.519	0	0	0	0	0	Gre bic
1	Mae par	T	0.55	0.56	0.42	0.245	3	3	2					1									0.0345373	0.0345114	0.0534537	0.667393	3.08734	8.55883	18.3274	0.0345114	0.0345373	0.0345373	0.0345373	0.0345373	0.0345373	18	0	0	5.5	0	0	0.0421187	0.758137	0	0	0.201011	0	0	Mae par
1	Gre bic	T	1.8	4.6	3.2	1.95	3	3															7.16038	4.46296	6.53176	7.1702	9.28197	20.2337	47.3921	4.46296	6.53176	7.16038	7.16038	7.16038	7.16038	0	0	0	0	0	0	7.16038	0	0	0	0	0	0	Gre bic
1	Gre bic	T	1.75	3.36	1.52	1.22	3	3	3														2.72491	1.73187	2.51041	2.73285	3.71795	8.51633	20.1786	1.73187	2.51041	2.72491	2.72491	2.72491	2.72491	38	0	0	0	0	0	4.39501	167.01	0	0	0	0	0	Gre bic
1	Mae par	T	0.68	0.72	0.89	0.4025	3	3						1									0.115248	0.113111	0.127259	0.958253	4.69215	13.5281	29.6654	0.113111	0.115248	0.115248	0.115248	0.115248	0.115248	0	0	0	5.5	0	0	0.115248	0	0	0	0.670758	0	0	Mae par
1	Mae par	T	0.65	0.5	0.59	0.2725	3	3															0.0504941	0.0498735	0.0583773	0.502872	2.43668	6.96299	15.185	0.0498735	0.0504941	0.0504941	0.0504941	0.0504941	0.0504941	0	0	0	0	0	0	0.0504941	0	0	0	0	0	0	Mae par
1	Gre bic	T	2.2	3.52	3.82	1.835	3	3	4			2											7.74977	4.17402	6.49211	7.74395	8.12241	11.9944	23.7268	4.17402	6.49211	7.74395	7.74977	7.74977	7.74977	63	0	18	0	0	0	20.9453	1319.56	0	170.117	0	0	0	Gre bic
1	Col mop	C	3	2.34	3.04	1.345	2	2	2			1											5.67754	0.0262849	0.210279	1.68223	5.67754	13.4579	26.2849	0.0262849	0.210279	1.68223	5.67754	5.67754	5.67754	18	0	5.5	0	0	0	6.92382	124.629	0	33.0439	0	0	0	Col mop
1	Gre bic	T	1.15	1.81	1.85	0.915	3	3	4														1.00724	0.825364	1.00501	1.41396	5.20054	16.3384	38.8012	0.825364	1.00501	1.00724	1.00724	1.00724	1.00724	63	0	0	0	0	0	2.72228	171.503	0	0	0	0	0	Gre bic
1	Mae par	T	0.35	0.68	0.3	0.245	7	7															0.0505699	0.0297384	-0.561598	-6.74225	-24.8176	-61.0647	-121.76	0.0505699	0.0505699	0.0505699	0.0505699	0.0505699	0.0505699	0	0	0	0	0	0	0.0505699	0	0	0	0	0	0	Mae par
1	Mae par	T	0.15	0.3	0.27	0.1425	7	7															0.00653282	-0.0931065	-0.959057	-8.14794	-27.8436	-66.3228	-129.863	0.00653282	0.00653282	0.00653282	0.00653282	0.00653282	0.00653282	0	0	0	0	0	0	0.00653282	0	0	0	0	0	0	Mae par
1	Mae par	T	0.2	0.61	0.3	0.2275	7	1															0.0325194	0.0812985	0.162597	0.325194	0.487791	0.650388	0.812985	0.0325194	0.0325194	0.0325194	0.0325194	0.0325194	0.0325194	0	0	0	0	0	0	0.0325194	0	0	0	0	0	0	Mae par
1	Mae par	T	0.3	0.3	0.51	0.2025	7	7															0.0299344	-0.00385625	-0.640308	-6.9465	-25.1945	-61.6612	-122.624	0.0299344	0.0299344	0.0299344	0.0299344	0.0299344	0.0299344	0	0	0	0	0	0	0.0299344	0	0	0	0	0	0	Mae par
1	Mae par	T	0.3	0.62	0.54	0.29	3	3															0.0263944	0.0342149	0.361701	4.82919	19.2679	49.5432	101.521	0.0263944	0.0263944	0.0263944	0.0263944	0.0263944	0.0263944	0	0	0	0	0	0	0.0263944	0	0	0	0	0	0	Mae par
1	Mae par	T	0.4	0.45	0.34	0.1975	3	3															0.0163226	0.0165776	0.0714112	1.06097	4.49891	11.9155	24.8409	0.0163226	0.0163226	0.0163226	0.0163226	0.0163226	0.0163226	0	0	0	0	0	0	0.0163226	0	0	0	0	0	0	Mae par
1	Mae par	T	0.3	0.46	0.26	0.18	3	3															0.0101686	0.0131815	0.139347	1.86047	7.42306	19.0868	39.1114	0.0101686	0.0101686	0.0101686	0.0101686	0.0101686	0.0101686	0	0	0	0	0	0	0.0101686	0	0	0	0	0	0	Mae par
1	Mae par	T	0.4	0.63	0.43	0.265	3	3															0.0293864	0.0298455	0.128565	1.91011	8.09962	21.452	44.7224	0.0293864	0.0293864	0.0293864	0.0293864	0.0293864	0.0293864	0	0	0	0	0	0	0.0293864	0	0	0	0	0	0	Mae par
1	Mae par	T	0.4	0.72	0.71	0.3575	3	3															0.0534818	0.0543175	0.233983	3.47632	14.7409	39.0417	81.3926	0.0534818	0.0534818	0.0534818	0.0534818	0.0534818	0.0534818	0	0	0	0	0	0	0.0534818	0	0	0	0	0	0	Mae par
1	Mae par	T	0.5	1	0.69	0.4225	3	3															0.0933722	0.0933722	0.186744	2.61442	11.7649	32.12	68.1617	0.0933722	0.0933722	0.0933722	0.0933722	0.0933722	0.0933722	0	0	0	0	0	0	0.0933722	0	0	0	0	0	0	Mae par
1	Mae par	T	0.4	0.55	0.22	0.1925	3	3															0.0155066	0.0157489	0.0678412	1.00793	4.274	11.3198	23.5991	0.0155066	0.0155066	0.0155066	0.0155066	0.0155066	0.0155066	0	0	0	0	0	0	0.0155066	0	0	0	0	0	0	Mae par
1	Mae par	T	0.35	1.08	0.76	0.46	3	3															0.0774779	0.0835767	0.573743	8.19504	33.7063	87.9498	181.768	0.0774779	0.0774779	0.0774779	0.0774779	0.0774779	0.0774779	0	0	0	0	0	0	0.0774779	0	0	0	0	0	0	Mae par
1	Mae par	T	0.3	0.89	0.52	0.3525	3	3															0.0389972	0.0505519	0.534406	7.13505	28.468	73.1992	149.995	0.0389972	0.0389972	0.0389972	0.0389972	0.0389972	0.0389972	0	0	0	0	0	0	0.0389972	0	0	0	0	0	0	Mae par
1	Mae par	T	0.3	0.62	0.64	0.315	3	3															0.0311413	0.0403683	0.426751	5.6977	22.7331	58.4533	119.779	0.0311413	0.0311413	0.0311413	0.0311413	0.0311413	0.0311413	0	0	0	0	0	0	0.0311413	0	0	0	0	0	0	Mae par
1	Mae par	T	0.4	0.9	0.82	0.43	3	3															0.0773733	0.0785822	0.338508	5.02926	21.326	56.4825	117.752	0.0773733	0.0773733	0.0773733	0.0773733	0.0773733	0.0773733	0	0	0	0	0	0	0.0773733	0	0	0	0	0	0	Mae par
1	Mae par	T	0.2	0.5	0.22	0.18	3	3															0.00677905	0.0296584	0.440639	4.94871	18.6085	46.5043	93.7204	0.00677905	0.00677905	0.00677905	0.00677905	0.00677905	0.00677905	0	0	0	0	0	0	0.00677905	0	0	0	0	0	0	Mae par
1	Col mop	C	2.1	2.31	2.66	1.2425	1	1	2			1											10.185	2.42501	4.85001	9.70002	14.55	19.4	24.2501	2.42501	4.85001	9.70002	10.185	10.185	10.185	18	0	5.5	0	0	0	12.4208	223.574	0	59.2779	0	0	0	Col mop
1	Cis cor	T	0.55	0.5	0.25	0.1875	3	3															0.0202283	0.0202131	0.0313075	0.390888	1.80824	5.01285	10.7342	0.0202131	0.0202283	0.0202283	0.0202283	0.0202283	0.0202283	0	0	0	0	0	0	0.0202283	0	0	0	0	0	0	Cis cor
1	Mae par	T	0.6	0.94	0.51	0.3625	3	3															0.0824824	0.0821006	0.106922	1.13031	5.36136	15.0912	32.6111	0.0821006	0.0824824	0.0824824	0.0824824	0.0824824	0.0824824	0	0	0	0	0	0	0.0824824	0	0	0	0	0	0	Mae par
1	Mae par	T	0.3	0.5	0.55	0.2625	3	3															0.0216259	0.0280336	0.296355	3.95674	15.7869	40.5926	83.1796	0.0216259	0.0216259	0.0216259	0.0216259	0.0216259	0.0216259	0	0	0	0	0	0	0.0216259	0	0	0	0	0	0	Mae par
1	Dic cin	T	0.4	0.72	0.59	0.3275	3	3															0.0448825	0.0455838	0.196361	2.91736	12.3707	32.7642	68.3055	0.0448825	0.0448825	0.0448825	0.0448825	0.0448825	0.0448825	0	0	0	0	0	0	0.0448825	0	0	0	0	0	0	Dic cin
1	Mae par	T	0.55	1.07	0.6	0.4175	3	3															0.100293	0.100217	0.155224	1.93804	8.96532	24.8539	53.2207	0.100217	0.100293	0.100293	0.100293	0.100293	0.100293	0	0	0	0	0	0	0.100293	0	0	0	0	0	0	Mae par
1	Mae par	T	0.35	0.6	0.66	0.315	3	3															0.0363315	0.0391914	0.269044	3.84288	15.8058	41.2421	85.236	0.0363315	0.0363315	0.0363315	0.0363315	0.0363315	0.0363315	0	0	0	0	0	0	0.0363315	0	0	0	0	0	0	Mae par
1	Mae par	T	0.7	1	0.9	0.475	3	3															0.165226	0.161373	0.178233	1.22354	6.02619	17.4764	38.4645	0.161373	0.165226	0.165226	0.165226	0.165226	0.165226	0	0	0	0	0	0	0.165226	0	0	0	0	0	0	Mae par
1	Gre bic	T	1.8	3.25	1.71	1.24	3	3	2														2.89541	1.80467	2.64122	2.89938	3.75331	8.18182	19.1637	1.80467	2.64122	2.89541	2.89541	2.89541	2.89541	18	0	0	0	0	0	3.53099	63.5578	0	0	0	0	0	Gre bic
1	Gre bic	T	2	2.32	2.56	1.22	3	3	3														3.11418	1.80039	2.72491	3.11418	3.50345	6.22836	13.6245	1.80039	2.72491	3.11418	3.11418	3.11418	3.11418	38	0	0	0	0	0	5.02287	190.869	0	0	0	0	0	Gre bic
1	Mae par	T	0.6	0.61	0.45	0.265	3	3															0.0440795	0.0438755	0.0571402	0.604053	2.86517	8.06492	17.4277	0.0438755	0.0440795	0.0440795	0.0440795	0.0440795	0.0440795	0	0	0	0	0	0	0.0440795	0	0	0	0	0	0	Mae par
1	Mae par	T	0.65	0.76	0.72	0.37	3	3			1												0.0930917	0.0919476	0.107625	0.927103	4.4923	12.8371	27.9953	0.0919476	0.0930917	0.0930917	0.0930917	0.0930917	0.0930917	0	5.5	0	0	0	0	0.0985097	0	0.541803	0	0	0	0	Mae par
1	Mae par	T	0.45	0.7	0.31	0.2525	3	3															0.0300144	0.0300556	0.0848143	1.25657	5.49152	14.7659	31.056	0.0300144	0.0300144	0.0300144	0.0300144	0.0300144	0.0300144	0	0	0	0	0	0	0.0300144	0	0	0	0	0	0	Mae par
1	Mae par	T	0.45	0.2	0.11	0.0775	3	3						1									0.00282755	0.00283143	0.00799005	0.118377	0.517337	1.39105	2.92568	0.00282755	0.00282755	0.00282755	0.00282755	0.00282755	0.00282755	0	0	0	5.5	0	0	0.00282755	0	0	0	0.0164566	0	0	Mae par
1	Mae par	T	0.5	0.25	0.01	0.065	3	3						1									0.00220999	0.00220999	0.00441999	0.0618798	0.278459	0.760237	1.61329	0.00220999	0.00220999	0.00220999	0.00220999	0.00220999	0.00220999	0	0	0	5.5	0	0	0.00220999	0	0	0	0.0128624	0	0	Mae par
1	Mae par	T	0.4	0.32	0.31	0.1575	1	1															0.0311725	0.0389656	0.0779311	0.155862	0.233793	0.311725	0.389656	0.0311725	0.0311725	0.0311725	0.0311725	0.0311725	0.0311725	0	0	0	0	0	0	0.0311725	0	0	0	0	0	0	Mae par
1	Dic cin	T	1	0.53	0.42	0.2375	3	3															0.0590094	0.0516332	0.0590094	0.118019	0.531085	1.65226	3.83561	0.0516332	0.0590094	0.0590094	0.0590094	0.0590094	0.0590094	0	0	0	0	0	0	0.0590094	0	0	0	0	0	0	Dic cin
1	Mae par	T	0.3	0.66	0.81	0.3675	3	3															0.0423867	0.0549458	0.580855	7.7552	30.9423	79.5615	163.032	0.0423867	0.0423867	0.0423867	0.0423867	0.0423867	0.0423867	0	0	0	0	0	0	0.0423867	0	0	0	0	0	0	Mae par
1	Col mop	C	2.3	2.52	2.24	1.19	2	2	2			3											3.40734	0.035006	0.280048	2.24038	7.56129	17.9231	35.006	0.035006	0.280048	2.24038	3.40734	3.40734	3.40734	18	0	38	0	0	0	4.1553	74.7953	0	208.837	0	0	0	Col mop
1	Gre bic	T	2.25	2.24	2.23	1.1175	3	3	4			2											2.93949	1.55644	2.43546	2.93546	3.04836	4.32254	8.30637	1.55644	2.43546	2.93546	2.93949	2.93949	2.93949	63	0	18	0	0	0	7.94456	500.507	0	64.5253	0	0	0	Gre bic
1	Gre fla	T	2.4	1.46	1.22	0.67	3	3	1														1.12708	0.567861	0.90336	1.12186	1.14469	1.46103	2.56006	0.567861	0.90336	1.12186	1.12708	1.12708	1.12708	5.5	0	0	0	0	0	1.19268	6.55973	0	0	0	0	0	Gre fla
1	Gre bic	T	1.3	2.22	2.56	1.195	3	3	3														1.94211	1.48951	1.91824	2.24531	6.28511	19.3415	46.7184	1.48951	1.91824	1.94211	1.94211	1.94211	1.94211	38	0	0	0	0	0	3.13243	119.032	0	0	0	0	0	Gre bic
1	Gre bic	T	1.85	2.21	1.96	1.0425	3	3	1														2.10338	1.28604	1.89937	2.1045	2.60862	5.40493	12.4867	1.28604	1.89937	2.10338	2.10338	2.10338	2.10338	5.5	0	0	0	0	0	2.2258	12.2419	0	0	0	0	0	Gre bic
1	Mae par	T	0.75	0.81	1	0.4525	3	3															0.160654	0.154704	0.166605	0.904425	4.49832	13.2332	29.3938	0.154704	0.160654	0.160654	0.160654	0.160654	0.160654	0	0	0	0	0	0	0.160654	0	0	0	0	0	0	Mae par
1	Gre bic	T	1.1	1.1	1.64	0.685	3	3	4			3											0.539968	0.45234	0.539562	0.835713	3.32257	10.4342	24.6048	0.45234	0.539562	0.539968	0.539968	0.539968	0.539968	63	0	38	0	0	0	1.45937	91.9405	0	33.0948	0	0	0	Gre bic
1	Gre bic	T	2.4	2.62	3.05	1.4175	3	3	1														5.04489	2.54179	4.0435	5.02153	5.12371	6.53967	11.459	2.54179	4.0435	5.02153	5.04489	5.04489	5.04489	5.5	0	0	0	0	0	5.33851	29.3618	0	0	0	0	0	Gre bic
1	Aca tor	T	0.5	0.86	1.4	0.565	3	3															0.166979	0.166979	0.333957	4.6754	21.0393	57.4407	121.894	0.166979	0.166979	0.166979	0.166979	0.166979	0.166979	0	0	0	0	0	0	0.166979	0	0	0	0	0	0	Aca tor
1	Mae par	T	0.75	0.3	0.22	0.13	3	3															0.01326	0.0127688	0.0137511	0.0746486	0.371279	1.09223	2.42608	0.0127688	0.01326	0.01326	0.01326	0.01326	0.01326	0	0	0	0	0	0	0.01326	0	0	0	0	0	0	Mae par
1	Aca tor	T	0.7	1.41	1.61	0.755	3	3															0.417432	0.407696	0.450291	3.09119	15.2247	44.1529	97.1778	0.407696	0.417432	0.417432	0.417432	0.417432	0.417432	0	0	0	0	0	0	0.417432	0	0	0	0	0	0	Aca tor
1	Dic cin	T	0.45	0.73	0.4	0.2825	1	1															0.112823	0.125359	0.250719	0.501437	0.752156	1.00287	1.25359	0.112823	0.112823	0.112823	0.112823	0.112823	0.112823	0	0	0	0	0	0	0.112823	0	0	0	0	0	0	Dic cin
1	Dic cin	T	1.4	1.15	1.56	0.6775	1	1															2.01881	0.721005	1.44201	2.88402	4.32603	5.76804	7.21005	0.721005	1.44201	2.01881	2.01881	2.01881	2.01881	0	0	0	0	0	0	2.01881	0	0	0	0	0	0	Dic cin
1	Col mop	C	1.8	2.51	3.21	1.43	1	1	2			2											11.5636	3.21212	6.42424	12.8485	19.2727	25.697	32.1212	3.21212	6.42424	11.5636	11.5636	11.5636	11.5636	18	0	18	0	0	0	14.102	253.836	0	253.836	0	0	0	Col mop
1	Dic cin	T	1.2	1.26	1.29	0.6375	3	3															0.510194	0.408923	0.507832	0.661363	2.2321	6.99155	16.7112	0.408923	0.507832	0.510194	0.510194	0.510194	0.510194	0	0	0	0	0	0	0.510194	0	0	0	0	0	0	Dic cin
1	Aca tor	T	0.75	0.71	0.41	0.28	3	3															0.0615136	0.0592354	0.0637919	0.346299	1.72238	5.0669	11.2547	0.0592354	0.0615136	0.0615136	0.0615136	0.0615136	0.0615136	0	0	0	0	0	0	0.0615136	0	0	0	0	0	0	Aca tor
1	Col mop	C	1.7	1.81	2.72	1.1325	3	3	3		2												2.28097	1.47871	2.12172	2.2935	3.30098	7.92977	18.9655	1.47871	2.12172	2.28097	2.28097	2.28097	2.28097	38	18	0	0	0	0	5.18402	196.993	93.3124	0	0	0	0	Col mop
1	Gre lep	T	1.3	1.41	1.51	0.73	1	1	3														2.1764	0.837077	1.67415	3.34831	5.02246	6.69662	8.37077	0.837077	1.67415	2.1764	2.1764	2.1764	2.1764	38	0	0	0	0	0	3.51032	133.392	0	0	0	0	0	Gre lep
1	Dic cin	T	0.9	0.92	0.8	0.43	3	3															0.17409	0.158806	0.174329	0.491941	2.38568	7.28837	16.6329	0.158806	0.17409	0.17409	0.17409	0.17409	0.17409	0	0	0	0	0	0	0.17409	0	0	0	0	0	0	Dic cin
1	Dic cin	T	1	1.1	0.8	0.475	1	1															0.708822	0.354411	0.708822	1.41764	2.12647	2.83529	3.54411	0.354411	0.708822	0.708822	0.708822	0.708822	0.708822	0	0	0	0	0	0	0.708822	0	0	0	0	0	0	Dic cin
1	Gre bic	T	1.9	1.95	1.61	0.89	3	3	2			2											1.57445	0.944576	1.40711	1.57468	1.87997	3.70026	8.41281	0.944576	1.40711	1.57445	1.57445	1.57445	1.57445	18	0	18	0	0	0	1.92006	34.561	0	34.561	0	0	0	Gre bic
1	Gre bic	T	2.2	2.71	2.76	1.3675	3	3	2														4.30399	2.31812	3.60552	4.30076	4.51095	6.66132	13.1771	2.31812	3.60552	4.30076	4.30399	4.30399	4.30399	18	0	0	0	0	0	5.24877	94.4779	0	0	0	0	0	Gre bic
1	Gre bic	T	1.5	2	2	1	3	3	2														1.56923	1.10427	1.51111	1.62734	3.13845	8.83416	21.5042	1.10427	1.51111	1.56923	1.56923	1.56923	1.56923	18	0	0	0	0	0	1.91369	34.4464	0	0	0	0	0	Gre bic
1	Gre bic	T	2.3	2.9	1.9	1.2	3	3	2														3.46485	1.80405	2.8392	3.45716	3.56253	4.86395	9.07006	1.80405	2.8392	3.45716	3.46485	3.46485	3.46485	18	0	0	0	0	0	4.22543	76.0577	0	0	0	0	0	Gre bic
1	Gre bic	T	2.1	1.76	3.15	1.2275	3	3	2														3.31022	1.84616	2.83447	3.30986	3.57079	5.76187	12.0277	1.84616	2.83447	3.30986	3.31022	3.31022	3.31022	18	0	0	0	0	0	4.03685	72.6633	0	0	0	0	0	Gre bic
1	Gre bic	T	1.4	2.81	3.16	1.4925	3	3	2														3.2625	2.39575	3.18641	3.51932	8.13248	24.1596	58.7346	2.39575	3.18641	3.2625	3.2625	3.2625	3.2625	18	0	0	0	0	0	3.97866	71.6159	0	0	0	0	0	Gre bic
1	Gre bic	T	1.8	2.23	2.05	1.07	3	3	4														2.15593	1.34376	1.96666	2.15888	2.79472	6.0922	14.2693	1.34376	1.96666	2.15593	2.15593	2.15593	2.15593	63	0	0	0	0	0	5.82683	367.09	0	0	0	0	0	Gre bic
1	Gre bic	T	1.9	1.92	2.41	1.0825	3	3	3														2.32918	1.39737	2.08163	2.32952	2.78116	5.47404	12.4456	1.39737	2.08163	2.32918	2.32918	2.32918	2.32918	38	0	0	0	0	0	3.75675	142.756	0	0	0	0	0	Gre bic
1	Gre bic	T	2.2	2	2.62	1.155	3	3	3														3.0703	1.65366	2.57204	3.06799	3.21793	4.75193	9.40005	1.65366	2.57204	3.06799	3.0703	3.0703	3.0703	38	0	0	0	0	0	4.9521	188.18	0	0	0	0	0	Gre bic
1	Gre bic	T	2	0.73	1	0.4325	1	1	4			1											1.17531	0.293827	0.587655	1.17531	1.76296	2.35062	2.93827	0.293827	0.587655	1.17531	1.17531	1.17531	1.17531	63	0	5.5	0	0	0	3.17651	200.12	0	6.84042	0	0	0	Gre bic
1	Col mop	C	2.7	1.92	2.4	1.08	1	1	2			1											9.89375	1.83218	3.66435	7.32871	10.9931	14.6574	18.3218	1.83218	3.66435	7.32871	9.89375	9.89375	9.89375	18	0	5.5	0	0	0	12.0656	217.18	0	57.5827	0	0	0	Col mop
1	Gre bic	T	1.95	2.44	2.51	1.2375	3	3	3														3.12406	1.8396	2.76283	3.12411	3.61179	6.75381	15.0781	1.8396	2.76283	3.12406	3.12406	3.12406	3.12406	38	0	0	0	0	0	5.0388	191.475	0	0	0	0	0	Gre bic
1	Col mop	C	2.1	2.51	1.6	1.0275	1	1	2														6.96519	1.65838	3.31676	6.63351	9.95027	13.267	16.5838	1.65838	3.31676	6.63351	6.96519	6.96519	6.96519	18	0	0	0	0	0	8.49413	152.894	0	0	0	0	0	Col mop
1	Gre bic	T	1.5	1.85	1.65	0.875	3	3	4														1.20144	0.845457	1.15694	1.24594	2.40288	6.76365	16.4642	0.845457	1.15694	1.20144	1.20144	1.20144	1.20144	63	0	0	0	0	0	3.24713	204.569	0	0	0	0	0	Gre bic
1	Gre bic	T	1.5	1.23	1.27	0.625	3	3	3														0.612979	0.431355	0.590276	0.635682	1.22596	3.45084	8.40008	0.431355	0.590276	0.612979	0.612979	0.612979	0.612979	38	0	0	0	0	0	0.988675	37.5697	0	0	0	0	0	Gre bic
1	Gre bic	T	2	2.45	1.57	1.005	1	1	3														6.34617	1.58654	3.17309	6.34617	9.51926	12.6923	15.8654	1.58654	3.17309	6.34617	6.34617	6.34617	6.34617	38	0	0	0	0	0	10.2358	388.959	0	0	0	0	0	Gre bic
1	Mae par	T	1.1	0.61	0.45	0.265	3	3															0.0808125	0.0676979	0.0807518	0.125074	0.497261	1.56161	3.6824	0.0676979	0.0807518	0.0808125	0.0808125	0.0808125	0.0808125	0	0	0	0	0	0	0.0808125	0	0	0	0	0	0	Mae par
1	Gre bic	T	1.1	1.94	1.61	0.8875	3	3	2			2											0.906408	0.759312	0.905727	1.40285	5.57737	17.5153	41.3025	0.759312	0.905727	0.906408	0.906408	0.906408	0.906408	18	0	18	0	0	0	1.10538	19.8968	0	19.8968	0	0	0	Gre bic
1	Gre bic	T	1.7	1.96	2.31	1.0675	3	3	2			2											2.02665	1.31384	1.88516	2.03779	2.93293	7.04563	16.8509	1.31384	1.88516	2.02665	2.02665	2.02665	2.02665	18	0	18	0	0	0	2.47152	44.4874	0	44.4874	0	0	0	Gre bic
1	Dic cin	T	1.25	1.21	1.45	0.665	3	3															0.578292	0.453381	0.573666	0.703203	2.16513	6.73595	16.1922	0.453381	0.573666	0.578292	0.578292	0.578292	0.578292	0	0	0	0	0	0	0.578292	0	0	0	0	0	0	Dic cin
1	Mae par	T	0.5	0.4	0.34	0.185	3	3															0.0179022	0.0179022	0.0358045	0.501263	2.25568	6.15837	13.0686	0.0179022	0.0179022	0.0179022	0.0179022	0.0179022	0.0179022	0	0	0	0	0	0	0.0179022	0	0	0	0	0	0	Mae par
1	Gre bic	T	1.9	2.02	3.11	1.2825	3	3	4														3.26936	1.96142	2.92188	3.26983	3.90378	7.68363	17.4693	1.96142	2.92188	3.26936	3.26936	3.26936	3.26936	63	0	0	0	0	0	8.8361	556.674	0	0	0	0	0	Gre bic
1	Dic cin	T	1.55	1.72	1.72	0.86	1	1															3.60146	1.16176	2.32352	4.64704	6.97057	9.29409	11.6176	1.16176	2.32352	3.60146	3.60146	3.60146	3.60146	0	0	0	0	0	0	3.60146	0	0	0	0	0	0	Dic cin
						#DIV/0!		#DIV/0!															#DIV/0!	#DIV/0!	#DIV/0!	#DIV/0!	#DIV/0!	#DIV/0!	#DIV/0!	#DIV/0!	#DIV/0!	#DIV/0!	#DIV/0!	#DIV/0!	#DIV/0!	0	0	0	0	0	0	#DIV/0!	#DIV/0!	#DIV/0!	#DIV/0!	#DIV/0!	#DIV/0!	#DIV/0!	0
						#DIV/0!		#DIV/0!															#DIV/0!	#DIV/0!	#DIV/0!	#DIV/0!	#DIV/0!	#DIV/0!	#DIV/0!	#DIV/0!	#DIV/0!	#DIV/0!	#DIV/0!	#DIV/0!	#DIV/0!	0	0	0	0	0	0	#DIV/0!	#DIV/0!	#DIV/0!	#DIV/0!	#DIV/0!	#DIV/0!	#DIV/0!	0
						#DIV/0!		#DIV/0!															#DIV/0!	#DIV/0!	#DIV/0!	#DIV/0!	#DIV/0!	#DIV/0!	#DIV/0!	#DIV/0!	#DIV/0!	#DIV/0!	#DIV/0!	#DIV/0!	#DIV/0!	0	0	0	0	0	0	#DIV/0!	#DIV/0!	#DIV/0!	#DIV/0!	#DIV/0!	#DIV/0!	#DIV/0!	0
						#DIV/0!		#DIV/0!															#DIV/0!	#DIV/0!	#DIV/0!	#DIV/0!	#DIV/0!	#DIV/0!	#DIV/0!	#DIV/0!	#DIV/0!	#DIV/0!	#DIV/0!	#DIV/0!	#DIV/0!	0	0	0	0	0	0	#DIV/0!	#DIV/0!	#DIV/0!	#DIV/0!	#DIV/0!	#DIV/0!	#DIV/0!	0
						#DIV/0!		#DIV/0!															#DIV/0!	#DIV/0!	#DIV/0!	#DIV/0!	#DIV/0!	#DIV/0!	#DIV/0!	#DIV/0!	#DIV/0!	#DIV/0!	#DIV/0!	#DIV/0!	#DIV/0!	0	0	0	0	0	0	#DIV/0!	#DIV/0!	#DIV/0!	#DIV/0!	#DIV/0!	#DIV/0!	#DIV/0!	0
						#DIV/0!		#DIV/0!															#DIV/0!	#DIV/0!	#DIV/0!	#DIV/0!	#DIV/0!	#DIV/0!	#DIV/0!	#DIV/0!	#DIV/0!	#DIV/0!	#DIV/0!	#DIV/0!	#DIV/0!	0	0	0	0	0	0	#DIV/0!	#DIV/0!	#DIV/0!	#DIV/0!	#DIV/0!	#DIV/0!	#DIV/0!	0
						#DIV/0!		#DIV/0!															#DIV/0!	#DIV/0!	#DIV/0!	#DIV/0!	#DIV/0!	#DIV/0!	#DIV/0!	#DIV/0!	#DIV/0!	#DIV/0!	#DIV/0!	#DIV/0!	#DIV/0!	0	0	0	0	0	0	#DIV/0!	#DIV/0!	#DIV/0!	#DIV/0!	#DIV/0!	#DIV/0!	#DIV/0!	0
						#DIV/0!		#DIV/0!															#DIV/0!	#DIV/0!	#DIV/0!	#DIV/0!	#DIV/0!	#DIV/0!	#DIV/0!	#DIV/0!	#DIV/0!	#DIV/0!	#DIV/0!	#DIV/0!	#DIV/0!	0	0	0	0	0	0	#DIV/0!	#DIV/0!	#DIV/0!	#DIV/0!	#DIV/0!	#DIV/0!	#DIV/0!	0
						#DIV/0!		#DIV/0!															#DIV/0!	#DIV/0!	#DIV/0!	#DIV/0!	#DIV/0!	#DIV/0!	#DIV/0!	#DIV/0!	#DIV/0!	#DIV/0!	#DIV/0!	#DIV/0!	#DIV/0!	0	0	0	0	0	0	#DIV/0!	#DIV/0!	#DIV/0!	#DIV/0!	#DIV/0!	#DIV/0!	#DIV/0!	0
						#DIV/0!		#DIV/0!															#DIV/0!	#DIV/0!	#DIV/0!	#DIV/0!	#DIV/0!	#DIV/0!	#DIV/0!	#DIV/0!	#DIV/0!	#DIV/0!	#DIV/0!	#DIV/0!	#DIV/0!	0	0	0	0	0	0	#DIV/0!	#DIV/0!	#DIV/0!	#DIV/0!	#DIV/0!	#DIV/0!	#DIV/0!	0
						#DIV/0!		#DIV/0!															#DIV/0!	#DIV/0!	#DIV/0!	#DIV/0!	#DIV/0!	#DIV/0!	#DIV/0!	#DIV/0!	#DIV/0!	#DIV/0!	#DIV/0!	#DIV/0!	#DIV/0!	0	0	0	0	0	0	#DIV/0!	#DIV/0!	#DIV/0!	#DIV/0!	#DIV/0!	#DIV/0!	#DIV/0!	0
						#DIV/0!		#DIV/0!															#DIV/0!	#DIV/0!	#DIV/0!	#DIV/0!	#DIV/0!	#DIV/0!	#DIV/0!	#DIV/0!	#DIV/0!	#DIV/0!	#DIV/0!	#DIV/0!	#DIV/0!	0	0	0	0	0	0	#DIV/0!	#DIV/0!	#DIV/0!	#DIV/0!	#DIV/0!	#DIV/0!	#DIV/0!	0
						#DIV/0!		#DIV/0!															#DIV/0!	#DIV/0!	#DIV/0!	#DIV/0!	#DIV/0!	#DIV/0!	#DIV/0!	#DIV/0!	#DIV/0!	#DIV/0!	#DIV/0!	#DIV/0!	#DIV/0!	0	0	0	0	0	0	#DIV/0!	#DIV/0!	#DIV/0!	#DIV/0!	#DIV/0!	#DIV/0!	#DIV/0!	0
						#DIV/0!		#DIV/0!															#DIV/0!	#DIV/0!	#DIV/0!	#DIV/0!	#DIV/0!	#DIV/0!	#DIV/0!	#DIV/0!	#DIV/0!	#DIV/0!	#DIV/0!	#DIV/0!	#DIV/0!	0	0	0	0	0	0	#DIV/0!	#DIV/0!	#DIV/0!	#DIV/0!	#DIV/0!	#DIV/0!	#DIV/0!	0
						#DIV/0!		#DIV/0!															#DIV/0!	#DIV/0!	#DIV/0!	#DIV/0!	#DIV/0!	#DIV/0!	#DIV/0!	#DIV/0!	#DIV/0!	#DIV/0!	#DIV/0!	#DIV/0!	#DIV/0!	0	0	0	0	0	0	#DIV/0!	#DIV/0!	#DIV/0!	#DIV/0!	#DIV/0!	#DIV/0!	#DIV/0!	0
						#DIV/0!		#DIV/0!															#DIV/0!	#DIV/0!	#DIV/0!	#DIV/0!	#DIV/0!	#DIV/0!	#DIV/0!	#DIV/0!	#DIV/0!	#DIV/0!	#DIV/0!	#DIV/0!	#DIV/0!	0	0	0	0	0	0	#DIV/0!	#DIV/0!	#DIV/0!	#DIV/0!	#DIV/0!	#DIV/0!	#DIV/0!	0
						#DIV/0!		#DIV/0!															#DIV/0!	#DIV/0!	#DIV/0!	#DIV/0!	#DIV/0!	#DIV/0!	#DIV/0!	#DIV/0!	#DIV/0!	#DIV/0!	#DIV/0!	#DIV/0!	#DIV/0!	0	0	0	0	0	0	#DIV/0!	#DIV/0!	#DIV/0!	#DIV/0!	#DIV/0!	#DIV/0!	#DIV/0!	0
						#DIV/0!		#DIV/0!															#DIV/0!	#DIV/0!	#DIV/0!	#DIV/0!	#DIV/0!	#DIV/0!	#DIV/0!	#DIV/0!	#DIV/0!	#DIV/0!	#DIV/0!	#DIV/0!	#DIV/0!	0	0	0	0	0	0	#DIV/0!	#DIV/0!	#DIV/0!	#DIV/0!	#DIV/0!	#DIV/0!	#DIV/0!	0
						#DIV/0!		#DIV/0!															#DIV/0!	#DIV/0!	#DIV/0!	#DIV/0!	#DIV/0!	#DIV/0!	#DIV/0!	#DIV/0!	#DIV/0!	#DIV/0!	#DIV/0!	#DIV/0!	#DIV/0!	0	0	0	0	0	0	#DIV/0!	#DIV/0!	#DIV/0!	#DIV/0!	#DIV/0!	#DIV/0!	#DIV/0!	0
						#DIV/0!		#DIV/0!															#DIV/0!	#DIV/0!	#DIV/0!	#DIV/0!	#DIV/0!	#DIV/0!	#DIV/0!	#DIV/0!	#DIV/0!	#DIV/0!	#DIV/0!	#DIV/0!	#DIV/0!	0	0	0	0	0	0	#DIV/0!	#DIV/0!	#DIV/0!	#DIV/0!	#DIV/0!	#DIV/0!	#DIV/0!	0
						#DIV/0!		#DIV/0!															#DIV/0!	#DIV/0!	#DIV/0!	#DIV/0!	#DIV/0!	#DIV/0!	#DIV/0!	#DIV/0!	#DIV/0!	#DIV/0!	#DIV/0!	#DIV/0!	#DIV/0!	0	0	0	0	0	0	#DIV/0!	#DIV/0!	#DIV/0!	#DIV/0!	#DIV/0!	#DIV/0!	#DIV/0!	0
						#DIV/0!		#DIV/0!															#DIV/0!	#DIV/0!	#DIV/0!	#DIV/0!	#DIV/0!	#DIV/0!	#DIV/0!	#DIV/0!	#DIV/0!	#DIV/0!	#DIV/0!	#DIV/0!	#DIV/0!	0	0	0	0	0	0	#DIV/0!	#DIV/0!	#DIV/0!	#DIV/0!	#DIV/0!	#DIV/0!	#DIV/0!	0
						#DIV/0!		#DIV/0!															#DIV/0!	#DIV/0!	#DIV/0!	#DIV/0!	#DIV/0!	#DIV/0!	#DIV/0!	#DIV/0!	#DIV/0!	#DIV/0!	#DIV/0!	#DIV/0!	#DIV/0!	0	0	0	0	0	0	#DIV/0!	#DIV/0!	#DIV/0!	#DIV/0!	#DIV/0!	#DIV/0!	#DIV/0!	0
						#DIV/0!		#DIV/0!															#DIV/0!	#DIV/0!	#DIV/0!	#DIV/0!	#DIV/0!	#DIV/0!	#DIV/0!	#DIV/0!	#DIV/0!	#DIV/0!	#DIV/0!	#DIV/0!	#DIV/0!	0	0	0	0	0	0	#DIV/0!	#DIV/0!	#DIV/0!	#DIV/0!	#DIV/0!	#DIV/0!	#DIV/0!	0
						#DIV/0!		#DIV/0!															#DIV/0!	#DIV/0!	#DIV/0!	#DIV/0!	#DIV/0!	#DIV/0!	#DIV/0!	#DIV/0!	#DIV/0!	#DIV/0!	#DIV/0!	#DIV/0!	#DIV/0!	0	0	0	0	0	0	#DIV/0!	#DIV/0!	#DIV/0!	#DIV/0!	#DIV/0!	#DIV/0!	#DIV/0!	0
						#DIV/0!		#DIV/0!															#DIV/0!	#DIV/0!	#DIV/0!	#DIV/0!	#DIV/0!	#DIV/0!	#DIV/0!	#DIV/0!	#DIV/0!	#DIV/0!	#DIV/0!	#DIV/0!	#DIV/0!	0	0	0	0	0	0	#DIV/0!	#DIV/0!	#DIV/0!	#DIV/0!	#DIV/0!	#DIV/0!	#DIV/0!	0
						#DIV/0!		#DIV/0!															#DIV/0!	#DIV/0!	#DIV/0!	#DIV/0!	#DIV/0!	#DIV/0!	#DIV/0!	#DIV/0!	#DIV/0!	#DIV/0!	#DIV/0!	#DIV/0!	#DIV/0!	0	0	0	0	0	0	#DIV/0!	#DIV/0!	#DIV/0!	#DIV/0!	#DIV/0!	#DIV/0!	#DIV/0!	0
						#DIV/0!		#DIV/0!															#DIV/0!	#DIV/0!	#DIV/0!	#DIV/0!	#DIV/0!	#DIV/0!	#DIV/0!	#DIV/0!	#DIV/0!	#DIV/0!	#DIV/0!	#DIV/0!	#DIV/0!	0	0	0	0	0	0	#DIV/0!	#DIV/0!	#DIV/0!	#DIV/0!	#DIV/0!	#DIV/0!	#DIV/0!	0
						#DIV/0!		#DIV/0!															#DIV/0!	#DIV/0!	#DIV/0!	#DIV/0!	#DIV/0!	#DIV/0!	#DIV/0!	#DIV/0!	#DIV/0!	#DIV/0!	#DIV/0!	#DIV/0!	#DIV/0!	0	0	0	0	0	0	#DIV/0!	#DIV/0!	#DIV/0!	#DIV/0!	#DIV/0!	#DIV/0!	#DIV/0!	0
						#DIV/0!		#DIV/0!															#DIV/0!	#DIV/0!	#DIV/0!	#DIV/0!	#DIV/0!	#DIV/0!	#DIV/0!	#DIV/0!	#DIV/0!	#DIV/0!	#DIV/0!	#DIV/0!	#DIV/0!	0	0	0	0	0	0	#DIV/0!	#DIV/0!	#DIV/0!	#DIV/0!	#DIV/0!	#DIV/0!	#DIV/0!	0
						#DIV/0!		#DIV/0!															#DIV/0!	#DIV/0!	#DIV/0!	#DIV/0!	#DIV/0!	#DIV/0!	#DIV/0!	#DIV/0!	#DIV/0!	#DIV/0!	#DIV/0!	#DIV/0!	#DIV/0!	0	0	0	0	0	0	#DIV/0!	#DIV/0!	#DIV/0!	#DIV/0!	#DIV/0!	#DIV/0!	#DIV/0!	0
						#DIV/0!		#DIV/0!															#DIV/0!	#DIV/0!	#DIV/0!	#DIV/0!	#DIV/0!	#DIV/0!	#DIV/0!	#DIV/0!	#DIV/0!	#DIV/0!	#DIV/0!	#DIV/0!	#DIV/0!	0	0	0	0	0	0	#DIV/0!	#DIV/0!	#DIV/0!	#DIV/0!	#DIV/0!	#DIV/0!	#DIV/0!	0
						#DIV/0!		#DIV/0!															#DIV/0!	#DIV/0!	#DIV/0!	#DIV/0!	#DIV/0!	#DIV/0!	#DIV/0!	#DIV/0!	#DIV/0!	#DIV/0!	#DIV/0!	#DIV/0!	#DIV/0!	0	0	0	0	0	0	#DIV/0!	#DIV/0!	#DIV/0!	#DIV/0!	#DIV/0!	#DIV/0!	#DIV/0!	0
						#DIV/0!		#DIV/0!															#DIV/0!	#DIV/0!	#DIV/0!	#DIV/0!	#DIV/0!	#DIV/0!	#DIV/0!	#DIV/0!	#DIV/0!	#DIV/0!	#DIV/0!	#DIV/0!	#DIV/0!	0	0	0	0	0	0	#DIV/0!	#DIV/0!	#DIV/0!	#DIV/0!	#DIV/0!	#DIV/0!	#DIV/0!	0
						#DIV/0!		#DIV/0!															#DIV/0!	#DIV/0!	#DIV/0!	#DIV/0!	#DIV/0!	#DIV/0!	#DIV/0!	#DIV/0!	#DIV/0!	#DIV/0!	#DIV/0!	#DIV/0!	#DIV/0!	0	0	0	0	0	0	#DIV/0!	#DIV/0!	#DIV/0!	#DIV/0!	#DIV/0!	#DIV/0!	#DIV/0!	0
						#DIV/0!		#DIV/0!															#DIV/0!	#DIV/0!	#DIV/0!	#DIV/0!	#DIV/0!	#DIV/0!	#DIV/0!	#DIV/0!	#DIV/0!	#DIV/0!	#DIV/0!	#DIV/0!	#DIV/0!	0	0	0	0	0	0	#DIV/0!	#DIV/0!	#DIV/0!	#DIV/0!	#DIV/0!	#DIV/0!	#DIV/0!	0
						#DIV/0!		#DIV/0!															#DIV/0!	#DIV/0!	#DIV/0!	#DIV/0!	#DIV/0!	#DIV/0!	#DIV/0!	#DIV/0!	#DIV/0!	#DIV/0!	#DIV/0!	#DIV/0!	#DIV/0!	0	0	0	0	0	0	#DIV/0!	#DIV/0!	#DIV/0!	#DIV/0!	#DIV/0!	#DIV/0!	#DIV/0!	0
						#DIV/0!		#DIV/0!															#DIV/0!	#DIV/0!	#DIV/0!	#DIV/0!	#DIV/0!	#DIV/0!	#DIV/0!	#DIV/0!	#DIV/0!	#DIV/0!	#DIV/0!	#DIV/0!	#DIV/0!	0	0	0	0	0	0	#DIV/0!	#DIV/0!	#DIV/0!	#DIV/0!	#DIV/0!	#DIV/0!	#DIV/0!	0
						#DIV/0!		#DIV/0!															#DIV/0!	#DIV/0!	#DIV/0!	#DIV/0!	#DIV/0!	#DIV/0!	#DIV/0!	#DIV/0!	#DIV/0!	#DIV/0!	#DIV/0!	#DIV/0!	#DIV/0!	0	0	0	0	0	0	#DIV/0!	#DIV/0!	#DIV/0!	#DIV/0!	#DIV/0!	#DIV/0!	#DIV/0!	0
						#DIV/0!		#DIV/0!															#DIV/0!	#DIV/0!	#DIV/0!	#DIV/0!	#DIV/0!	#DIV/0!	#DIV/0!	#DIV/0!	#DIV/0!	#DIV/0!	#DIV/0!	#DIV/0!	#DIV/0!	0	0	0	0	0	0	#DIV/0!	#DIV/0!	#DIV/0!	#DIV/0!	#DIV/0!	#DIV/0!	#DIV/0!	0
						#DIV/0!		#DIV/0!															#DIV/0!	#DIV/0!	#DIV/0!	#DIV/0!	#DIV/0!	#DIV/0!	#DIV/0!	#DIV/0!	#DIV/0!	#DIV/0!	#DIV/0!	#DIV/0!	#DIV/0!	0	0	0	0	0	0	#DIV/0!	#DIV/0!	#DIV/0!	#DIV/0!	#DIV/0!	#DIV/0!	#DIV/0!	0
						#DIV/0!		#DIV/0!															#DIV/0!	#DIV/0!	#DIV/0!	#DIV/0!	#DIV/0!	#DIV/0!	#DIV/0!	#DIV/0!	#DIV/0!	#DIV/0!	#DIV/0!	#DIV/0!	#DIV/0!	0	0	0	0	0	0	#DIV/0!	#DIV/0!	#DIV/0!	#DIV/0!	#DIV/0!	#DIV/0!	#DIV/0!	0
						#DIV/0!		#DIV/0!															#DIV/0!	#DIV/0!	#DIV/0!	#DIV/0!	#DIV/0!	#DIV/0!	#DIV/0!	#DIV/0!	#DIV/0!	#DIV/0!	#DIV/0!	#DIV/0!	#DIV/0!	0	0	0	0	0	0	#DIV/0!	#DIV/0!	#DIV/0!	#DIV/0!	#DIV/0!	#DIV/0!	#DIV/0!	0
						#DIV/0!		#DIV/0!															#DIV/0!	#DIV/0!	#DIV/0!	#DIV/0!	#DIV/0!	#DIV/0!	#DIV/0!	#DIV/0!	#DIV/0!	#DIV/0!	#DIV/0!	#DIV/0!	#DIV/0!	0	0	0	0	0	0	#DIV/0!	#DIV/0!	#DIV/0!	#DIV/0!	#DIV/0!	#DIV/0!	#DIV/0!	0
						#DIV/0!		#DIV/0!															#DIV/0!	#DIV/0!	#DIV/0!	#DIV/0!	#DIV/0!	#DIV/0!	#DIV/0!	#DIV/0!	#DIV/0!	#DIV/0!	#DIV/0!	#DIV/0!	#DIV/0!	0	0	0	0	0	0	#DIV/0!	#DIV/0!	#DIV/0!	#DIV/0!	#DIV/0!	#DIV/0!	#DIV/0!	0
						#DIV/0!		#DIV/0!															#DIV/0!	#DIV/0!	#DIV/0!	#DIV/0!	#DIV/0!	#DIV/0!	#DIV/0!	#DIV/0!	#DIV/0!	#DIV/0!	#DIV/0!	#DIV/0!	#DIV/0!	0	0	0	0	0	0	#DIV/0!	#DIV/0!	#DIV/0!	#DIV/0!	#DIV/0!	#DIV/0!	#DIV/0!	0
						#DIV/0!		#DIV/0!															#DIV/0!	#DIV/0!	#DIV/0!	#DIV/0!	#DIV/0!	#DIV/0!	#DIV/0!	#DIV/0!	#DIV/0!	#DIV/0!	#DIV/0!	#DIV/0!	#DIV/0!	0	0	0	0	0	0	#DIV/0!	#DIV/0!	#DIV/0!	#DIV/0!	#DIV/0!	#DIV/0!	#DIV/0!	0
						#DIV/0!		#DIV/0!															#DIV/0!	#DIV/0!	#DIV/0!	#DIV/0!	#DIV/0!	#DIV/0!	#DIV/0!	#DIV/0!	#DIV/0!	#DIV/0!	#DIV/0!	#DIV/0!	#DIV/0!	0	0	0	0	0	0	#DIV/0!	#DIV/0!	#DIV/0!	#DIV/0!	#DIV/0!	#DIV/0!	#DIV/0!	0
						#DIV/0!		#DIV/0!															#DIV/0!	#DIV/0!	#DIV/0!	#DIV/0!	#DIV/0!	#DIV/0!	#DIV/0!	#DIV/0!	#DIV/0!	#DIV/0!	#DIV/0!	#DIV/0!	#DIV/0!	0	0	0	0	0	0	#DIV/0!	#DIV/0!	#DIV/0!	#DIV/0!	#DIV/0!	#DIV/0!	#DIV/0!	0
						#DIV/0!		#DIV/0!															#DIV/0!	#DIV/0!	#DIV/0!	#DIV/0!	#DIV/0!	#DIV/0!	#DIV/0!	#DIV/0!	#DIV/0!	#DIV/0!	#DIV/0!	#DIV/0!	#DIV/0!	0	0	0	0	0	0	#DIV/0!	#DIV/0!	#DIV/0!	#DIV/0!	#DIV/0!	#DIV/0!	#DIV/0!	0
						#DIV/0!		#DIV/0!															#DIV/0!	#DIV/0!	#DIV/0!	#DIV/0!	#DIV/0!	#DIV/0!	#DIV/0!	#DIV/0!	#DIV/0!	#DIV/0!	#DIV/0!	#DIV/0!	#DIV/0!	0	0	0	0	0	0	#DIV/0!	#DIV/0!	#DIV/0!	#DIV/0!	#DIV/0!	#DIV/0!	#DIV/0!	0
						#DIV/0!		#DIV/0!															#DIV/0!	#DIV/0!	#DIV/0!	#DIV/0!	#DIV/0!	#DIV/0!	#DIV/0!	#DIV/0!	#DIV/0!	#DIV/0!	#DIV/0!	#DIV/0!	#DIV/0!	0	0	0	0	0	0	#DIV/0!	#DIV/0!	#DIV/0!	#DIV/0!	#DIV/0!	#DIV/0!	#DIV/0!	0
						#DIV/0!		#DIV/0!															#DIV/0!	#DIV/0!	#DIV/0!	#DIV/0!	#DIV/0!	#DIV/0!	#DIV/0!	#DIV/0!	#DIV/0!	#DIV/0!	#DIV/0!	#DIV/0!	#DIV/0!	0	0	0	0	0	0	#DIV/0!	#DIV/0!	#DIV/0!	#DIV/0!	#DIV/0!	#DIV/0!	#DIV/0!	0
						#DIV/0!		#DIV/0!															#DIV/0!	#DIV/0!	#DIV/0!	#DIV/0!	#DIV/0!	#DIV/0!	#DIV/0!	#DIV/0!	#DIV/0!	#DIV/0!	#DIV/0!	#DIV/0!	#DIV/0!	0	0	0	0	0	0	#DIV/0!	#DIV/0!	#DIV/0!	#DIV/0!	#DIV/0!	#DIV/0!	#DIV/0!	0
						#DIV/0!		#DIV/0!															#DIV/0!	#DIV/0!	#DIV/0!	#DIV/0!	#DIV/0!	#DIV/0!	#DIV/0!	#DIV/0!	#DIV/0!	#DIV/0!	#DIV/0!	#DIV/0!	#DIV/0!	0	0	0	0	0	0	#DIV/0!	#DIV/0!	#DIV/0!	#DIV/0!	#DIV/0!	#DIV/0!	#DIV/0!	0
						#DIV/0!		#DIV/0!															#DIV/0!	#DIV/0!	#DIV/0!	#DIV/0!	#DIV/0!	#DIV/0!	#DIV/0!	#DIV/0!	#DIV/0!	#DIV/0!	#DIV/0!	#DIV/0!	#DIV/0!	0	0	0	0	0	0	#DIV/0!	#DIV/0!	#DIV/0!	#DIV/0!	#DIV/0!	#DIV/0!	#DIV/0!	0
						#DIV/0!		#DIV/0!															#DIV/0!	#DIV/0!	#DIV/0!	#DIV/0!	#DIV/0!	#DIV/0!	#DIV/0!	#DIV/0!	#DIV/0!	#DIV/0!	#DIV/0!	#DIV/0!	#DIV/0!	0	0	0	0	0	0	#DIV/0!	#DIV/0!	#DIV/0!	#DIV/0!	#DIV/0!	#DIV/0!	#DIV/0!	0
						#DIV/0!		#DIV/0!															#DIV/0!	#DIV/0!	#DIV/0!	#DIV/0!	#DIV/0!	#DIV/0!	#DIV/0!	#DIV/0!	#DIV/0!	#DIV/0!	#DIV/0!	#DIV/0!	#DIV/0!	0	0	0	0	0	0	#DIV/0!	#DIV/0!	#DIV/0!	#DIV/0!	#DIV/0!	#DIV/0!	#DIV/0!	0
						#DIV/0!		#DIV/0!															#DIV/0!	#DIV/0!	#DIV/0!	#DIV/0!	#DIV/0!	#DIV/0!	#DIV/0!	#DIV/0!	#DIV/0!	#DIV/0!	#DIV/0!	#DIV/0!	#DIV/0!	0	0	0	0	0	0	#DIV/0!	#DIV/0!	#DIV/0!	#DIV/0!	#DIV/0!	#DIV/0!	#DIV/0!	0
						#DIV/0!		#DIV/0!															#DIV/0!	#DIV/0!	#DIV/0!	#DIV/0!	#DIV/0!	#DIV/0!	#DIV/0!	#DIV/0!	#DIV/0!	#DIV/0!	#DIV/0!	#DIV/0!	#DIV/0!	0	0	0	0	0	0	#DIV/0!	#DIV/0!	#DIV/0!	#DIV/0!	#DIV/0!	#DIV/0!	#DIV/0!	0
						#DIV/0!		#DIV/0!															#DIV/0!	#DIV/0!	#DIV/0!	#DIV/0!	#DIV/0!	#DIV/0!	#DIV/0!	#DIV/0!	#DIV/0!	#DIV/0!	#DIV/0!	#DIV/0!	#DIV/0!	0	0	0	0	0	0	#DIV/0!	#DIV/0!	#DIV/0!	#DIV/0!	#DIV/0!	#DIV/0!	#DIV/0!	0
						#DIV/0!		#DIV/0!															#DIV/0!	#DIV/0!	#DIV/0!	#DIV/0!	#DIV/0!	#DIV/0!	#DIV/0!	#DIV/0!	#DIV/0!	#DIV/0!	#DIV/0!	#DIV/0!	#DIV/0!	0	0	0	0	0	0	#DIV/0!	#DIV/0!	#DIV/0!	#DIV/0!	#DIV/0!	#DIV/0!	#DIV/0!	0
						#DIV/0!		#DIV/0!															#DIV/0!	#DIV/0!	#DIV/0!	#DIV/0!	#DIV/0!	#DIV/0!	#DIV/0!	#DIV/0!	#DIV/0!	#DIV/0!	#DIV/0!	#DIV/0!	#DIV/0!	0	0	0	0	0	0	#DIV/0!	#DIV/0!	#DIV/0!	#DIV/0!	#DIV/0!	#DIV/0!	#DIV/0!	0
						#DIV/0!		#DIV/0!															#DIV/0!	#DIV/0!	#DIV/0!	#DIV/0!	#DIV/0!	#DIV/0!	#DIV/0!	#DIV/0!	#DIV/0!	#DIV/0!	#DIV/0!	#DIV/0!	#DIV/0!	0	0	0	0	0	0	#DIV/0!	#DIV/0!	#DIV/0!	#DIV/0!	#DIV/0!	#DIV/0!	#DIV/0!	0
						#DIV/0!		#DIV/0!															#DIV/0!	#DIV/0!	#DIV/0!	#DIV/0!	#DIV/0!	#DIV/0!	#DIV/0!	#DIV/0!	#DIV/0!	#DIV/0!	#DIV/0!	#DIV/0!	#DIV/0!	0	0	0	0	0	0	#DIV/0!	#DIV/0!	#DIV/0!	#DIV/0!	#DIV/0!	#DIV/0!	#DIV/0!	0
						#DIV/0!		#DIV/0!															#DIV/0!	#DIV/0!	#DIV/0!	#DIV/0!	#DIV/0!	#DIV/0!	#DIV/0!	#DIV/0!	#DIV/0!	#DIV/0!	#DIV/0!	#DIV/0!	#DIV/0!	0	0	0	0	0	0	#DIV/0!	#DIV/0!	#DIV/0!	#DIV/0!	#DIV/0!	#DIV/0!	#DIV/0!	0
						#DIV/0!		#DIV/0!															#DIV/0!	#DIV/0!	#DIV/0!	#DIV/0!	#DIV/0!	#DIV/0!	#DIV/0!	#DIV/0!	#DIV/0!	#DIV/0!	#DIV/0!	#DIV/0!	#DIV/0!	0	0	0	0	0	0	#DIV/0!	#DIV/0!	#DIV/0!	#DIV/0!	#DIV/0!	#DIV/0!	#DIV/0!	0
						#DIV/0!		#DIV/0!															#DIV/0!	#DIV/0!	#DIV/0!	#DIV/0!	#DIV/0!	#DIV/0!	#DIV/0!	#DIV/0!	#DIV/0!	#DIV/0!	#DIV/0!	#DIV/0!	#DIV/0!	0	0	0	0	0	0	#DIV/0!	#DIV/0!	#DIV/0!	#DIV/0!	#DIV/0!	#DIV/0!	#DIV/0!	0
						#DIV/0!		#DIV/0!															#DIV/0!	#DIV/0!	#DIV/0!	#DIV/0!	#DIV/0!	#DIV/0!	#DIV/0!	#DIV/0!	#DIV/0!	#DIV/0!	#DIV/0!	#DIV/0!	#DIV/0!	0	0	0	0	0	0	#DIV/0!	#DIV/0!	#DIV/0!	#DIV/0!	#DIV/0!	#DIV/0!	#DIV/0!	0
						#DIV/0!		#DIV/0!															#DIV/0!	#DIV/0!	#DIV/0!	#DIV/0!	#DIV/0!	#DIV/0!	#DIV/0!	#DIV/0!	#DIV/0!	#DIV/0!	#DIV/0!	#DIV/0!	#DIV/0!	0	0	0	0	0	0	#DIV/0!	#DIV/0!	#DIV/0!	#DIV/0!	#DIV/0!	#DIV/0!	#DIV/0!	0
						#DIV/0!		#DIV/0!															#DIV/0!	#DIV/0!	#DIV/0!	#DIV/0!	#DIV/0!	#DIV/0!	#DIV/0!	#DIV/0!	#DIV/0!	#DIV/0!	#DIV/0!	#DIV/0!	#DIV/0!	0	0	0	0	0	0	#DIV/0!	#DIV/0!	#DIV/0!	#DIV/0!	#DIV/0!	#DIV/0!	#DIV/0!	0
						#DIV/0!		#DIV/0!															#DIV/0!	#DIV/0!	#DIV/0!	#DIV/0!	#DIV/0!	#DIV/0!	#DIV/0!	#DIV/0!	#DIV/0!	#DIV/0!	#DIV/0!	#DIV/0!	#DIV/0!	0	0	0	0	0	0	#DIV/0!	#DIV/0!	#DIV/0!	#DIV/0!	#DIV/0!	#DIV/0!	#DIV/0!	0
						#DIV/0!		#DIV/0!															#DIV/0!	#DIV/0!	#DIV/0!	#DIV/0!	#DIV/0!	#DIV/0!	#DIV/0!	#DIV/0!	#DIV/0!	#DIV/0!	#DIV/0!	#DIV/0!	#DIV/0!	0	0	0	0	0	0	#DIV/0!	#DIV/0!	#DIV/0!	#DIV/0!	#DIV/0!	#DIV/0!	#DIV/0!	0
						#DIV/0!		#DIV/0!															#DIV/0!	#DIV/0!	#DIV/0!	#DIV/0!	#DIV/0!	#DIV/0!	#DIV/0!	#DIV/0!	#DIV/0!	#DIV/0!	#DIV/0!	#DIV/0!	#DIV/0!	0	0	0	0	0	0	#DIV/0!	#DIV/0!	#DIV/0!	#DIV/0!	#DIV/0!	#DIV/0!	#DIV/0!	0
						#DIV/0!		#DIV/0!															#DIV/0!	#DIV/0!	#DIV/0!	#DIV/0!	#DIV/0!	#DIV/0!	#DIV/0!	#DIV/0!	#DIV/0!	#DIV/0!	#DIV/0!	#DIV/0!	#DIV/0!	0	0	0	0	0	0	#DIV/0!	#DIV/0!	#DIV/0!	#DIV/0!	#DIV/0!	#DIV/0!	#DIV/0!	0
						#DIV/0!		#DIV/0!															#DIV/0!	#DIV/0!	#DIV/0!	#DIV/0!	#DIV/0!	#DIV/0!	#DIV/0!	#DIV/0!	#DIV/0!	#DIV/0!	#DIV/0!	#DIV/0!	#DIV/0!	0	0	0	0	0	0	#DIV/0!	#DIV/0!	#DIV/0!	#DIV/0!	#DIV/0!	#DIV/0!	#DIV/0!	0
						#DIV/0!		#DIV/0!															#DIV/0!	#DIV/0!	#DIV/0!	#DIV/0!	#DIV/0!	#DIV/0!	#DIV/0!	#DIV/0!	#DIV/0!	#DIV/0!	#DIV/0!	#DIV/0!	#DIV/0!	0	0	0	0	0	0	#DIV/0!	#DIV/0!	#DIV/0!	#DIV/0!	#DIV/0!	#DIV/0!	#DIV/0!	0
						#DIV/0!		#DIV/0!															#DIV/0!	#DIV/0!	#DIV/0!	#DIV/0!	#DIV/0!	#DIV/0!	#DIV/0!	#DIV/0!	#DIV/0!	#DIV/0!	#DIV/0!	#DIV/0!	#DIV/0!	0	0	0	0	0	0	#DIV/0!	#DIV/0!	#DIV/0!	#DIV/0!	#DIV/0!	#DIV/0!	#DIV/0!	0
						#DIV/0!		#DIV/0!															#DIV/0!	#DIV/0!	#DIV/0!	#DIV/0!	#DIV/0!	#DIV/0!	#DIV/0!	#DIV/0!	#DIV/0!	#DIV/0!	#DIV/0!	#DIV/0!	#DIV/0!	0	0	0	0	0	0	#DIV/0!	#DIV/0!	#DIV/0!	#DIV/0!	#DIV/0!	#DIV/0!	#DIV/0!	0
						#DIV/0!		#DIV/0!															#DIV/0!	#DIV/0!	#DIV/0!	#DIV/0!	#DIV/0!	#DIV/0!	#DIV/0!	#DIV/0!	#DIV/0!	#DIV/0!	#DIV/0!	#DIV/0!	#DIV/0!	0	0	0	0	0	0	#DIV/0!	#DIV/0!	#DIV/0!	#DIV/0!	#DIV/0!	#DIV/0!	#DIV/0!	0
						#DIV/0!		#DIV/0!															#DIV/0!	#DIV/0!	#DIV/0!	#DIV/0!	#DIV/0!	#DIV/0!	#DIV/0!	#DIV/0!	#DIV/0!	#DIV/0!	#DIV/0!	#DIV/0!	#DIV/0!	0	0	0	0	0	0	#DIV/0!	#DIV/0!	#DIV/0!	#DIV/0!	#DIV/0!	#DIV/0!	#DIV/0!	0
						#DIV/0!		#DIV/0!															#DIV/0!	#DIV/0!	#DIV/0!	#DIV/0!	#DIV/0!	#DIV/0!	#DIV/0!	#DIV/0!	#DIV/0!	#DIV/0!	#DIV/0!	#DIV/0!	#DIV/0!	0	0	0	0	0	0	#DIV/0!	#DIV/0!	#DIV/0!	#DIV/0!	#DIV/0!	#DIV/0!	#DIV/0!	0
						#DIV/0!		#DIV/0!															#DIV/0!	#DIV/0!	#DIV/0!	#DIV/0!	#DIV/0!	#DIV/0!	#DIV/0!	#DIV/0!	#DIV/0!	#DIV/0!	#DIV/0!	#DIV/0!	#DIV/0!	0	0	0	0	0	0	#DIV/0!	#DIV/0!	#DIV/0!	#DIV/0!	#DIV/0!	#DIV/0!	#DIV/0!	0
						#DIV/0!		#DIV/0!															#DIV/0!	#DIV/0!	#DIV/0!	#DIV/0!	#DIV/0!	#DIV/0!	#DIV/0!	#DIV/0!	#DIV/0!	#DIV/0!	#DIV/0!	#DIV/0!	#DIV/0!	0	0	0	0	0	0	#DIV/0!	#DIV/0!	#DIV/0!	#DIV/0!	#DIV/0!	#DIV/0!	#DIV/0!	0
						#DIV/0!		#DIV/0!															#DIV/0!	#DIV/0!	#DIV/0!	#DIV/0!	#DIV/0!	#DIV/0!	#DIV/0!	#DIV/0!	#DIV/0!	#DIV/0!	#DIV/0!	#DIV/0!	#DIV/0!	0	0	0	0	0	0	#DIV/0!	#DIV/0!	#DIV/0!	#DIV/0!	#DIV/0!	#DIV/0!	#DIV/0!	0
						#DIV/0!		#DIV/0!															#DIV/0!	#DIV/0!	#DIV/0!	#DIV/0!	#DIV/0!	#DIV/0!	#DIV/0!	#DIV/0!	#DIV/0!	#DIV/0!	#DIV/0!	#DIV/0!	#DIV/0!	0	0	0	0	0	0	#DIV/0!	#DIV/0!	#DIV/0!	#DIV/0!	#DIV/0!	#DIV/0!	#DIV/0!	0
						#DIV/0!		#DIV/0!															#DIV/0!	#DIV/0!	#DIV/0!	#DIV/0!	#DIV/0!	#DIV/0!	#DIV/0!	#DIV/0!	#DIV/0!	#DIV/0!	#DIV/0!	#DIV/0!	#DIV/0!	0	0	0	0	0	0	#DIV/0!	#DIV/0!	#DIV/0!	#DIV/0!	#DIV/0!	#DIV/0!	#DIV/0!	0
						#DIV/0!		#DIV/0!															#DIV/0!	#DIV/0!	#DIV/0!	#DIV/0!	#DIV/0!	#DIV/0!	#DIV/0!	#DIV/0!	#DIV/0!	#DIV/0!	#DIV/0!	#DIV/0!	#DIV/0!	0	0	0	0	0	0	#DIV/0!	#DIV/0!	#DIV/0!	#DIV/0!	#DIV/0!	#DIV/0!	#DIV/0!	0
						#DIV/0!		#DIV/0!															#DIV/0!	#DIV/0!	#DIV/0!	#DIV/0!	#DIV/0!	#DIV/0!	#DIV/0!	#DIV/0!	#DIV/0!	#DIV/0!	#DIV/0!	#DIV/0!	#DIV/0!	0	0	0	0	0	0	#DIV/0!	#DIV/0!	#DIV/0!	#DIV/0!	#DIV/0!	#DIV/0!	#DIV/0!	0
						#DIV/0!		#DIV/0!															#DIV/0!	#DIV/0!	#DIV/0!	#DIV/0!	#DIV/0!	#DIV/0!	#DIV/0!	#DIV/0!	#DIV/0!	#DIV/0!	#DIV/0!	#DIV/0!	#DIV/0!	0	0	0	0	0	0	#DIV/0!	#DIV/0!	#DIV/0!	#DIV/0!	#DIV/0!	#DIV/0!	#DIV/0!	0
						#DIV/0!		#DIV/0!															#DIV/0!	#DIV/0!	#DIV/0!	#DIV/0!	#DIV/0!	#DIV/0!	#DIV/0!	#DIV/0!	#DIV/0!	#DIV/0!	#DIV/0!	#DIV/0!	#DIV/0!	0	0	0	0	0	0	#DIV/0!	#DIV/0!	#DIV/0!	#DIV/0!	#DIV/0!	#DIV/0!	#DIV/0!	0
						#DIV/0!		#DIV/0!															#DIV/0!	#DIV/0!	#DIV/0!	#DIV/0!	#DIV/0!	#DIV/0!	#DIV/0!	#DIV/0!	#DIV/0!	#DIV/0!	#DIV/0!	#DIV/0!	#DIV/0!	0	0	0	0	0	0	#DIV/0!	#DIV/0!	#DIV/0!	#DIV/0!	#DIV/0!	#DIV/0!	#DIV/0!	0
						#DIV/0!		#DIV/0!															#DIV/0!	#DIV/0!	#DIV/0!	#DIV/0!	#DIV/0!	#DIV/0!	#DIV/0!	#DIV/0!	#DIV/0!	#DIV/0!	#DIV/0!	#DIV/0!	#DIV/0!	0	0	0	0	0	0	#DIV/0!	#DIV/0!	#DIV/0!	#DIV/0!	#DIV/0!	#DIV/0!	#DIV/0!	0
						#DIV/0!		#DIV/0!															#DIV/0!	#DIV/0!	#DIV/0!	#DIV/0!	#DIV/0!	#DIV/0!	#DIV/0!	#DIV/0!	#DIV/0!	#DIV/0!	#DIV/0!	#DIV/0!	#DIV/0!	0	0	0	0	0	0	#DIV/0!	#DIV/0!	#DIV/0!	#DIV/0!	#DIV/0!	#DIV/0!	#DIV/0!	0
						#DIV/0!		#DIV/0!															#DIV/0!	#DIV/0!	#DIV/0!	#DIV/0!	#DIV/0!	#DIV/0!	#DIV/0!	#DIV/0!	#DIV/0!	#DIV/0!	#DIV/0!	#DIV/0!	#DIV/0!	0	0	0	0	0	0	#DIV/0!	#DIV/0!	#DIV/0!	#DIV/0!	#DIV/0!	#DIV/0!	#DIV/0!	0
						#DIV/0!		#DIV/0!															#DIV/0!	#DIV/0!	#DIV/0!	#DIV/0!	#DIV/0!	#DIV/0!	#DIV/0!	#DIV/0!	#DIV/0!	#DIV/0!	#DIV/0!	#DIV/0!	#DIV/0!	0	0	0	0	0	0	#DIV/0!	#DIV/0!	#DIV/0!	#DIV/0!	#DIV/0!	#DIV/0!	#DIV/0!	0
						#DIV/0!		#DIV/0!															#DIV/0!	#DIV/0!	#DIV/0!	#DIV/0!	#DIV/0!	#DIV/0!	#DIV/0!	#DIV/0!	#DIV/0!	#DIV/0!	#DIV/0!	#DIV/0!	#DIV/0!	0	0	0	0	0	0	#DIV/0!	#DIV/0!	#DIV/0!	#DIV/0!	#DIV/0!	#DIV/0!	#DIV/0!	0
						#DIV/0!		#DIV/0!															#DIV/0!	#DIV/0!	#DIV/0!	#DIV/0!	#DIV/0!	#DIV/0!	#DIV/0!	#DIV/0!	#DIV/0!	#DIV/0!	#DIV/0!	#DIV/0!	#DIV/0!	0	0	0	0	0	0	#DIV/0!	#DIV/0!	#DIV/0!	#DIV/0!	#DIV/0!	#DIV/0!	#DIV/0!	0
						#DIV/0!		#DIV/0!															#DIV/0!	#DIV/0!	#DIV/0!	#DIV/0!	#DIV/0!	#DIV/0!	#DIV/0!	#DIV/0!	#DIV/0!	#DIV/0!	#DIV/0!	#DIV/0!	#DIV/0!	0	0	0	0	0	0	#DIV/0!	#DIV/0!	#DIV/0!	#DIV/0!	#DIV/0!	#DIV/0!	#DIV/0!	0
						#DIV/0!		#DIV/0!															#DIV/0!	#DIV/0!	#DIV/0!	#DIV/0!	#DIV/0!	#DIV/0!	#DIV/0!	#DIV/0!	#DIV/0!	#DIV/0!	#DIV/0!	#DIV/0!	#DIV/0!	0	0	0	0	0	0	#DIV/0!	#DIV/0!	#DIV/0!	#DIV/0!	#DIV/0!	#DIV/0!	#DIV/0!	0
						#DIV/0!		#DIV/0!															#DIV/0!	#DIV/0!	#DIV/0!	#DIV/0!	#DIV/0!	#DIV/0!	#DIV/0!	#DIV/0!	#DIV/0!	#DIV/0!	#DIV/0!	#DIV/0!	#DIV/0!	0	0	0	0	0	0	#DIV/0!	#DIV/0!	#DIV/0!	#DIV/0!	#DIV/0!	#DIV/0!	#DIV/0!	0
						#DIV/0!		#DIV/0!															#DIV/0!	#DIV/0!	#DIV/0!	#DIV/0!	#DIV/0!	#DIV/0!	#DIV/0!	#DIV/0!	#DIV/0!	#DIV/0!	#DIV/0!	#DIV/0!	#DIV/0!	0	0	0	0	0	0	#DIV/0!	#DIV/0!	#DIV/0!	#DIV/0!	#DIV/0!	#DIV/0!	#DIV/0!	0
						#DIV/0!		#DIV/0!															#DIV/0!	#DIV/0!	#DIV/0!	#DIV/0!	#DIV/0!	#DIV/0!	#DIV/0!	#DIV/0!	#DIV/0!	#DIV/0!	#DIV/0!	#DIV/0!	#DIV/0!	0	0	0	0	0	0	#DIV/0!	#DIV/0!	#DIV/0!	#DIV/0!	#DIV/0!	#DIV/0!	#DIV/0!	0
						#DIV/0!		#DIV/0!															#DIV/0!	#DIV/0!	#DIV/0!	#DIV/0!	#DIV/0!	#DIV/0!	#DIV/0!	#DIV/0!	#DIV/0!	#DIV/0!	#DIV/0!	#DIV/0!	#DIV/0!	0	0	0	0	0	0	#DIV/0!	#DIV/0!	#DIV/0!	#DIV/0!	#DIV/0!	#DIV/0!	#DIV/0!	0
						#DIV/0!		#DIV/0!															#DIV/0!	#DIV/0!	#DIV/0!	#DIV/0!	#DIV/0!	#DIV/0!	#DIV/0!	#DIV/0!	#DIV/0!	#DIV/0!	#DIV/0!	#DIV/0!	#DIV/0!	0	0	0	0	0	0	#DIV/0!	#DIV/0!	#DIV/0!	#DIV/0!	#DIV/0!	#DIV/0!	#DIV/0!	0
						#DIV/0!		#DIV/0!															#DIV/0!	#DIV/0!	#DIV/0!	#DIV/0!	#DIV/0!	#DIV/0!	#DIV/0!	#DIV/0!	#DIV/0!	#DIV/0!	#DIV/0!	#DIV/0!	#DIV/0!	0	0	0	0	0	0	#DIV/0!	#DIV/0!	#DIV/0!	#DIV/0!	#DIV/0!	#DIV/0!	#DIV/0!	0
						#DIV/0!		#DIV/0!															#DIV/0!	#DIV/0!	#DIV/0!	#DIV/0!	#DIV/0!	#DIV/0!	#DIV/0!	#DIV/0!	#DIV/0!	#DIV/0!	#DIV/0!	#DIV/0!	#DIV/0!	0	0	0	0	0	0	#DIV/0!	#DIV/0!	#DIV/0!	#DIV/0!	#DIV/0!	#DIV/0!	#DIV/0!	0
						#DIV/0!		#DIV/0!															#DIV/0!	#DIV/0!	#DIV/0!	#DIV/0!	#DIV/0!	#DIV/0!	#DIV/0!	#DIV/0!	#DIV/0!	#DIV/0!	#DIV/0!	#DIV/0!	#DIV/0!	0	0	0	0	0	0	#DIV/0!	#DIV/0!	#DIV/0!	#DIV/0!	#DIV/0!	#DIV/0!	#DIV/0!	0
						#DIV/0!		#DIV/0!															#DIV/0!	#DIV/0!	#DIV/0!	#DIV/0!	#DIV/0!	#DIV/0!	#DIV/0!	#DIV/0!	#DIV/0!	#DIV/0!	#DIV/0!	#DIV/0!	#DIV/0!	0	0	0	0	0	0	#DIV/0!	#DIV/0!	#DIV/0!	#DIV/0!	#DIV/0!	#DIV/0!	#DIV/0!	0
						#DIV/0!		#DIV/0!															#DIV/0!	#DIV/0!	#DIV/0!	#DIV/0!	#DIV/0!	#DIV/0!	#DIV/0!	#DIV/0!	#DIV/0!	#DIV/0!	#DIV/0!	#DIV/0!	#DIV/0!	0	0	0	0	0	0	#DIV/0!	#DIV/0!	#DIV/0!	#DIV/0!	#DIV/0!	#DIV/0!	#DIV/0!	0
						#DIV/0!		#DIV/0!															#DIV/0!	#DIV/0!	#DIV/0!	#DIV/0!	#DIV/0!	#DIV/0!	#DIV/0!	#DIV/0!	#DIV/0!	#DIV/0!	#DIV/0!	#DIV/0!	#DIV/0!	0	0	0	0	0	0	#DIV/0!	#DIV/0!	#DIV/0!	#DIV/0!	#DIV/0!	#DIV/0!	#DIV/0!	0
						#DIV/0!		#DIV/0!															#DIV/0!	#DIV/0!	#DIV/0!	#DIV/0!	#DIV/0!	#DIV/0!	#DIV/0!	#DIV/0!	#DIV/0!	#DIV/0!	#DIV/0!	#DIV/0!	#DIV/0!	0	0	0	0	0	0	#DIV/0!	#DIV/0!	#DIV/0!	#DIV/0!	#DIV/0!	#DIV/0!	#DIV/0!	0
						#DIV/0!		#DIV/0!															#DIV/0!	#DIV/0!	#DIV/0!	#DIV/0!	#DIV/0!	#DIV/0!	#DIV/0!	#DIV/0!	#DIV/0!	#DIV/0!	#DIV/0!	#DIV/0!	#DIV/0!	0	0	0	0	0	0	#DIV/0!	#DIV/0!	#DIV/0!	#DIV/0!	#DIV/0!	#DIV/0!	#DIV/0!	0
						#DIV/0!		#DIV/0!															#DIV/0!	#DIV/0!	#DIV/0!	#DIV/0!	#DIV/0!	#DIV/0!	#DIV/0!	#DIV/0!	#DIV/0!	#DIV/0!	#DIV/0!	#DIV/0!	#DIV/0!	0	0	0	0	0	0	#DIV/0!	#DIV/0!	#DIV/0!	#DIV/0!	#DIV/0!	#DIV/0!	#DIV/0!	0
						#DIV/0!		#DIV/0!															#DIV/0!	#DIV/0!	#DIV/0!	#DIV/0!	#DIV/0!	#DIV/0!	#DIV/0!	#DIV/0!	#DIV/0!	#DIV/0!	#DIV/0!	#DIV/0!	#DIV/0!	0	0	0	0	0	0	#DIV/0!	#DIV/0!	#DIV/0!	#DIV/0!	#DIV/0!	#DIV/0!	#DIV/0!	0
						#DIV/0!		#DIV/0!															#DIV/0!	#DIV/0!	#DIV/0!	#DIV/0!	#DIV/0!	#DIV/0!	#DIV/0!	#DIV/0!	#DIV/0!	#DIV/0!	#DIV/0!	#DIV/0!	#DIV/0!	0	0	0	0	0	0	#DIV/0!	#DIV/0!	#DIV/0!	#DIV/0!	#DIV/0!	#DIV/0!	#DIV/0!	0
						#DIV/0!		#DIV/0!															#DIV/0!	#DIV/0!	#DIV/0!	#DIV/0!	#DIV/0!	#DIV/0!	#DIV/0!	#DIV/0!	#DIV/0!	#DIV/0!	#DIV/0!	#DIV/0!	#DIV/0!	0	0	0	0	0	0	#DIV/0!	#DIV/0!	#DIV/0!	#DIV/0!	#DIV/0!	#DIV/0!	#DIV/0!	0
						#DIV/0!		#DIV/0!															#DIV/0!	#DIV/0!	#DIV/0!	#DIV/0!	#DIV/0!	#DIV/0!	#DIV/0!	#DIV/0!	#DIV/0!	#DIV/0!	#DIV/0!	#DIV/0!	#DIV/0!	0	0	0	0	0	0	#DIV/0!	#DIV/0!	#DIV/0!	#DIV/0!	#DIV/0!	#DIV/0!	#DIV/0!	0
						#DIV/0!		#DIV/0!															#DIV/0!	#DIV/0!	#DIV/0!	#DIV/0!	#DIV/0!	#DIV/0!	#DIV/0!	#DIV/0!	#DIV/0!	#DIV/0!	#DIV/0!	#DIV/0!	#DIV/0!	0	0	0	0	0	0	#DIV/0!	#DIV/0!	#DIV/0!	#DIV/0!	#DIV/0!	#DIV/0!	#DIV/0!	0
						#DIV/0!		#DIV/0!															#DIV/0!	#DIV/0!	#DIV/0!	#DIV/0!	#DIV/0!	#DIV/0!	#DIV/0!	#DIV/0!	#DIV/0!	#DIV/0!	#DIV/0!	#DIV/0!	#DIV/0!	0	0	0	0	0	0	#DIV/0!	#DIV/0!	#DIV/0!	#DIV/0!	#DIV/0!	#DIV/0!	#DIV/0!	0
						#DIV/0!		#DIV/0!															#DIV/0!	#DIV/0!	#DIV/0!	#DIV/0!	#DIV/0!	#DIV/0!	#DIV/0!	#DIV/0!	#DIV/0!	#DIV/0!	#DIV/0!	#DIV/0!	#DIV/0!	0	0	0	0	0	0	#DIV/0!	#DIV/0!	#DIV/0!	#DIV/0!	#DIV/0!	#DIV/0!	#DIV/0!	0
						#DIV/0!		#DIV/0!															#DIV/0!	#DIV/0!	#DIV/0!	#DIV/0!	#DIV/0!	#DIV/0!	#DIV/0!	#DIV/0!	#DIV/0!	#DIV/0!	#DIV/0!	#DIV/0!	#DIV/0!	0	0	0	0	0	0	#DIV/0!	#DIV/0!	#DIV/0!	#DIV/0!	#DIV/0!	#DIV/0!	#DIV/0!	0
						#DIV/0!		#DIV/0!															#DIV/0!	#DIV/0!	#DIV/0!	#DIV/0!	#DIV/0!	#DIV/0!	#DIV/0!	#DIV/0!	#DIV/0!	#DIV/0!	#DIV/0!	#DIV/0!	#DIV/0!	0	0	0	0	0	0	#DIV/0!	#DIV/0!	#DIV/0!	#DIV/0!	#DIV/0!	#DIV/0!	#DIV/0!	0
						#DIV/0!		#DIV/0!															#DIV/0!	#DIV/0!	#DIV/0!	#DIV/0!	#DIV/0!	#DIV/0!	#DIV/0!	#DIV/0!	#DIV/0!	#DIV/0!	#DIV/0!	#DIV/0!	#DIV/0!	0	0	0	0	0	0	#DIV/0!	#DIV/0!	#DIV/0!	#DIV/0!	#DIV/0!	#DIV/0!	#DIV/0!	0
						#DIV/0!		#DIV/0!															#DIV/0!	#DIV/0!	#DIV/0!	#DIV/0!	#DIV/0!	#DIV/0!	#DIV/0!	#DIV/0!	#DIV/0!	#DIV/0!	#DIV/0!	#DIV/0!	#DIV/0!	0	0	0	0	0	0	#DIV/0!	#DIV/0!	#DIV/0!	#DIV/0!	#DIV/0!	#DIV/0!	#DIV/0!	0
						#DIV/0!		#DIV/0!															#DIV/0!	#DIV/0!	#DIV/0!	#DIV/0!	#DIV/0!	#DIV/0!	#DIV/0!	#DIV/0!	#DIV/0!	#DIV/0!	#DIV/0!	#DIV/0!	#DIV/0!	0	0	0	0	0	0	#DIV/0!	#DIV/0!	#DIV/0!	#DIV/0!	#DIV/0!	#DIV/0!	#DIV/0!	0
						#DIV/0!		#DIV/0!															#DIV/0!	#DIV/0!	#DIV/0!	#DIV/0!	#DIV/0!	#DIV/0!	#DIV/0!	#DIV/0!	#DIV/0!	#DIV/0!	#DIV/0!	#DIV/0!	#DIV/0!	0	0	0	0	0	0	#DIV/0!	#DIV/0!	#DIV/0!	#DIV/0!	#DIV/0!	#DIV/0!	#DIV/0!	0
						#DIV/0!		#DIV/0!															#DIV/0!	#DIV/0!	#DIV/0!	#DIV/0!	#DIV/0!	#DIV/0!	#DIV/0!	#DIV/0!	#DIV/0!	#DIV/0!	#DIV/0!	#DIV/0!	#DIV/0!	0	0	0	0	0	0	#DIV/0!	#DIV/0!	#DIV/0!	#DIV/0!	#DIV/0!	#DIV/0!	#DIV/0!	0
						#DIV/0!		#DIV/0!															#DIV/0!	#DIV/0!	#DIV/0!	#DIV/0!	#DIV/0!	#DIV/0!	#DIV/0!	#DIV/0!	#DIV/0!	#DIV/0!	#DIV/0!	#DIV/0!	#DIV/0!	0	0	0	0	0	0	#DIV/0!	#DIV/0!	#DIV/0!	#DIV/0!	#DIV/0!	#DIV/0!	#DIV/0!	0
						#DIV/0!		#DIV/0!															#DIV/0!	#DIV/0!	#DIV/0!	#DIV/0!	#DIV/0!	#DIV/0!	#DIV/0!	#DIV/0!	#DIV/0!	#DIV/0!	#DIV/0!	#DIV/0!	#DIV/0!	0	0	0	0	0	0	#DIV/0!	#DIV/0!	#DIV/0!	#DIV/0!	#DIV/0!	#DIV/0!	#DIV/0!	0
						#DIV/0!		#DIV/0!															#DIV/0!	#DIV/0!	#DIV/0!	#DIV/0!	#DIV/0!	#DIV/0!	#DIV/0!	#DIV/0!	#DIV/0!	#DIV/0!	#DIV/0!	#DIV/0!	#DIV/0!	0	0	0	0	0	0	#DIV/0!	#DIV/0!	#DIV/0!	#DIV/0!	#DIV/0!	#DIV/0!	#DIV/0!	0
						#DIV/0!		#DIV/0!															#DIV/0!	#DIV/0!	#DIV/0!	#DIV/0!	#DIV/0!	#DIV/0!	#DIV/0!	#DIV/0!	#DIV/0!	#DIV/0!	#DIV/0!	#DIV/0!	#DIV/0!	0	0	0	0	0	0	#DIV/0!	#DIV/0!	#DIV/0!	#DIV/0!	#DIV/0!	#DIV/0!	#DIV/0!	0
						#DIV/0!		#DIV/0!															#DIV/0!	#DIV/0!	#DIV/0!	#DIV/0!	#DIV/0!	#DIV/0!	#DIV/0!	#DIV/0!	#DIV/0!	#DIV/0!	#DIV/0!	#DIV/0!	#DIV/0!	0	0	0	0	0	0	#DIV/0!	#DIV/0!	#DIV/0!	#DIV/0!	#DIV/0!	#DIV/0!	#DIV/0!	0
						#DIV/0!		#DIV/0!															#DIV/0!	#DIV/0!	#DIV/0!	#DIV/0!	#DIV/0!	#DIV/0!	#DIV/0!	#DIV/0!	#DIV/0!	#DIV/0!	#DIV/0!	#DIV/0!	#DIV/0!	0	0	0	0	0	0	#DIV/0!	#DIV/0!	#DIV/0!	#DIV/0!	#DIV/0!	#DIV/0!	#DIV/0!	0
						#DIV/0!		#DIV/0!															#DIV/0!	#DIV/0!	#DIV/0!	#DIV/0!	#DIV/0!	#DIV/0!	#DIV/0!	#DIV/0!	#DIV/0!	#DIV/0!	#DIV/0!	#DIV/0!	#DIV/0!	0	0	0	0	0	0	#DIV/0!	#DIV/0!	#DIV/0!	#DIV/0!	#DIV/0!	#DIV/0!	#DIV/0!	0
						#DIV/0!		#DIV/0!															#DIV/0!	#DIV/0!	#DIV/0!	#DIV/0!	#DIV/0!	#DIV/0!	#DIV/0!	#DIV/0!	#DIV/0!	#DIV/0!	#DIV/0!	#DIV/0!	#DIV/0!	0	0	0	0	0	0	#DIV/0!	#DIV/0!	#DIV/0!	#DIV/0!	#DIV/0!	#DIV/0!	#DIV/0!	0
						#DIV/0!		#DIV/0!															#DIV/0!	#DIV/0!	#DIV/0!	#DIV/0!	#DIV/0!	#DIV/0!	#DIV/0!	#DIV/0!	#DIV/0!	#DIV/0!	#DIV/0!	#DIV/0!	#DIV/0!	0	0	0	0	0	0	#DIV/0!	#DIV/0!	#DIV/0!	#DIV/0!	#DIV/0!	#DIV/0!	#DIV/0!	0
						#DIV/0!		#DIV/0!															#DIV/0!	#DIV/0!	#DIV/0!	#DIV/0!	#DIV/0!	#DIV/0!	#DIV/0!	#DIV/0!	#DIV/0!	#DIV/0!	#DIV/0!	#DIV/0!	#DIV/0!	0	0	0	0	0	0	#DIV/0!	#DIV/0!	#DIV/0!	#DIV/0!	#DIV/0!	#DIV/0!	#DIV/0!	0
						#DIV/0!		#DIV/0!															#DIV/0!	#DIV/0!	#DIV/0!	#DIV/0!	#DIV/0!	#DIV/0!	#DIV/0!	#DIV/0!	#DIV/0!	#DIV/0!	#DIV/0!	#DIV/0!	#DIV/0!	0	0	0	0	0	0	#DIV/0!	#DIV/0!	#DIV/0!	#DIV/0!	#DIV/0!	#DIV/0!	#DIV/0!	0
						#DIV/0!		#DIV/0!															#DIV/0!	#DIV/0!	#DIV/0!	#DIV/0!	#DIV/0!	#DIV/0!	#DIV/0!	#DIV/0!	#DIV/0!	#DIV/0!	#DIV/0!	#DIV/0!	#DIV/0!	0	0	0	0	0	0	#DIV/0!	#DIV/0!	#DIV/0!	#DIV/0!	#DIV/0!	#DIV/0!	#DIV/0!	0
						#DIV/0!		#DIV/0!															#DIV/0!	#DIV/0!	#DIV/0!	#DIV/0!	#DIV/0!	#DIV/0!	#DIV/0!	#DIV/0!	#DIV/0!	#DIV/0!	#DIV/0!	#DIV/0!	#DIV/0!	0	0	0	0	0	0	#DIV/0!	#DIV/0!	#DIV/0!	#DIV/0!	#DIV/0!	#DIV/0!	#DIV/0!	0
						#DIV/0!		#DIV/0!															#DIV/0!	#DIV/0!	#DIV/0!	#DIV/0!	#DIV/0!	#DIV/0!	#DIV/0!	#DIV/0!	#DIV/0!	#DIV/0!	#DIV/0!	#DIV/0!	#DIV/0!	0	0	0	0	0	0	#DIV/0!	#DIV/0!	#DIV/0!	#DIV/0!	#DIV/0!	#DIV/0!	#DIV/0!	0
						#DIV/0!		#DIV/0!															#DIV/0!	#DIV/0!	#DIV/0!	#DIV/0!	#DIV/0!	#DIV/0!	#DIV/0!	#DIV/0!	#DIV/0!	#DIV/0!	#DIV/0!	#DIV/0!	#DIV/0!	0	0	0	0	0	0	#DIV/0!	#DIV/0!	#DIV/0!	#DIV/0!	#DIV/0!	#DIV/0!	#DIV/0!	0
						#DIV/0!		#DIV/0!															#DIV/0!	#DIV/0!	#DIV/0!	#DIV/0!	#DIV/0!	#DIV/0!	#DIV/0!	#DIV/0!	#DIV/0!	#DIV/0!	#DIV/0!	#DIV/0!	#DIV/0!	0	0	0	0	0	0	#DIV/0!	#DIV/0!	#DIV/0!	#DIV/0!	#DIV/0!	#DIV/0!	#DIV/0!	0
						#DIV/0!		#DIV/0!															#DIV/0!	#DIV/0!	#DIV/0!	#DIV/0!	#DIV/0!	#DIV/0!	#DIV/0!	#DIV/0!	#DIV/0!	#DIV/0!	#DIV/0!	#DIV/0!	#DIV/0!	0	0	0	0	0	0	#DIV/0!	#DIV/0!	#DIV/0!	#DIV/0!	#DIV/0!	#DIV/0!	#DIV/0!	0
						#DIV/0!		#DIV/0!															#DIV/0!	#DIV/0!	#DIV/0!	#DIV/0!	#DIV/0!	#DIV/0!	#DIV/0!	#DIV/0!	#DIV/0!	#DIV/0!	#DIV/0!	#DIV/0!	#DIV/0!	0	0	0	0	0	0	#DIV/0!	#DIV/0!	#DIV/0!	#DIV/0!	#DIV/0!	#DIV/0!	#DIV/0!	0
						#DIV/0!		#DIV/0!															#DIV/0!	#DIV/0!	#DIV/0!	#DIV/0!	#DIV/0!	#DIV/0!	#DIV/0!	#DIV/0!	#DIV/0!	#DIV/0!	#DIV/0!	#DIV/0!	#DIV/0!	0	0	0	0	0	0	#DIV/0!	#DIV/0!	#DIV/0!	#DIV/0!	#DIV/0!	#DIV/0!	#DIV/0!	0
						#DIV/0!		#DIV/0!															#DIV/0!	#DIV/0!	#DIV/0!	#DIV/0!	#DIV/0!	#DIV/0!	#DIV/0!	#DIV/0!	#DIV/0!	#DIV/0!	#DIV/0!	#DIV/0!	#DIV/0!	0	0	0	0	0	0	#DIV/0!	#DIV/0!	#DIV/0!	#DIV/0!	#DIV/0!	#DIV/0!	#DIV/0!	0
						#DIV/0!		#DIV/0!															#DIV/0!	#DIV/0!	#DIV/0!	#DIV/0!	#DIV/0!	#DIV/0!	#DIV/0!	#DIV/0!	#DIV/0!	#DIV/0!	#DIV/0!	#DIV/0!	#DIV/0!	0	0	0	0	0	0	#DIV/0!	#DIV/0!	#DIV/0!	#DIV/0!	#DIV/0!	#DIV/0!	#DIV/0!	0
						#DIV/0!		#DIV/0!															#DIV/0!	#DIV/0!	#DIV/0!	#DIV/0!	#DIV/0!	#DIV/0!	#DIV/0!	#DIV/0!	#DIV/0!	#DIV/0!	#DIV/0!	#DIV/0!	#DIV/0!	0	0	0	0	0	0	#DIV/0!	#DIV/0!	#DIV/0!	#DIV/0!	#DIV/0!	#DIV/0!	#DIV/0!	0
						#DIV/0!		#DIV/0!															#DIV/0!	#DIV/0!	#DIV/0!	#DIV/0!	#DIV/0!	#DIV/0!	#DIV/0!	#DIV/0!	#DIV/0!	#DIV/0!	#DIV/0!	#DIV/0!	#DIV/0!	0	0	0	0	0	0	#DIV/0!	#DIV/0!	#DIV/0!	#DIV/0!	#DIV/0!	#DIV/0!	#DIV/0!	0
						#DIV/0!		#DIV/0!															#DIV/0!	#DIV/0!	#DIV/0!	#DIV/0!	#DIV/0!	#DIV/0!	#DIV/0!	#DIV/0!	#DIV/0!	#DIV/0!	#DIV/0!	#DIV/0!	#DIV/0!	0	0	0	0	0	0	#DIV/0!	#DIV/0!	#DIV/0!	#DIV/0!	#DIV/0!	#DIV/0!	#DIV/0!	0
						#DIV/0!		#DIV/0!															#DIV/0!	#DIV/0!	#DIV/0!	#DIV/0!	#DIV/0!	#DIV/0!	#DIV/0!	#DIV/0!	#DIV/0!	#DIV/0!	#DIV/0!	#DIV/0!	#DIV/0!	0	0	0	0	0	0	#DIV/0!	#DIV/0!	#DIV/0!	#DIV/0!	#DIV/0!	#DIV/0!	#DIV/0!	0
						#DIV/0!		#DIV/0!															#DIV/0!	#DIV/0!	#DIV/0!	#DIV/0!	#DIV/0!	#DIV/0!	#DIV/0!	#DIV/0!	#DIV/0!	#DIV/0!	#DIV/0!	#DIV/0!	#DIV/0!	0	0	0	0	0	0	#DIV/0!	#DIV/0!	#DIV/0!	#DIV/0!	#DIV/0!	#DIV/0!	#DIV/0!	0
						#DIV/0!		#DIV/0!															#DIV/0!	#DIV/0!	#DIV/0!	#DIV/0!	#DIV/0!	#DIV/0!	#DIV/0!	#DIV/0!	#DIV/0!	#DIV/0!	#DIV/0!	#DIV/0!	#DIV/0!	0	0	0	0	0	0	#DIV/0!	#DIV/0!	#DIV/0!	#DIV/0!	#DIV/0!	#DIV/0!	#DIV/0!	0
						#DIV/0!		#DIV/0!															#DIV/0!	#DIV/0!	#DIV/0!	#DIV/0!	#DIV/0!	#DIV/0!	#DIV/0!	#DIV/0!	#DIV/0!	#DIV/0!	#DIV/0!	#DIV/0!	#DIV/0!	0	0	0	0	0	0	#DIV/0!	#DIV/0!	#DIV/0!	#DIV/0!	#DIV/0!	#DIV/0!	#DIV/0!	0
						#DIV/0!		#DIV/0!															#DIV/0!	#DIV/0!	#DIV/0!	#DIV/0!	#DIV/0!	#DIV/0!	#DIV/0!	#DIV/0!	#DIV/0!	#DIV/0!	#DIV/0!	#DIV/0!	#DIV/0!	0	0	0	0	0	0	#DIV/0!	#DIV/0!	#DIV/0!	#DIV/0!	#DIV/0!	#DIV/0!	#DIV/0!	0
						#DIV/0!		#DIV/0!															#DIV/0!	#DIV/0!	#DIV/0!	#DIV/0!	#DIV/0!	#DIV/0!	#DIV/0!	#DIV/0!	#DIV/0!	#DIV/0!	#DIV/0!	#DIV/0!	#DIV/0!	0	0	0	0	0	0	#DIV/0!	#DIV/0!	#DIV/0!	#DIV/0!	#DIV/0!	#DIV/0!	#DIV/0!	0
						#DIV/0!		#DIV/0!															#DIV/0!	#DIV/0!	#DIV/0!	#DIV/0!	#DIV/0!	#DIV/0!	#DIV/0!	#DIV/0!	#DIV/0!	#DIV/0!	#DIV/0!	#DIV/0!	#DIV/0!	0	0	0	0	0	0	#DIV/0!	#DIV/0!	#DIV/0!	#DIV/0!	#DIV/0!	#DIV/0!	#DIV/0!	0
						#DIV/0!		#DIV/0!															#DIV/0!	#DIV/0!	#DIV/0!	#DIV/0!	#DIV/0!	#DIV/0!	#DIV/0!	#DIV/0!	#DIV/0!	#DIV/0!	#DIV/0!	#DIV/0!	#DIV/0!	0	0	0	0	0	0	#DIV/0!	#DIV/0!	#DIV/0!	#DIV/0!	#DIV/0!	#DIV/0!	#DIV/0!	0
						#DIV/0!		#DIV/0!															#DIV/0!	#DIV/0!	#DIV/0!	#DIV/0!	#DIV/0!	#DIV/0!	#DIV/0!	#DIV/0!	#DIV/0!	#DIV/0!	#DIV/0!	#DIV/0!	#DIV/0!	0	0	0	0	0	0	#DIV/0!	#DIV/0!	#DIV/0!	#DIV/0!	#DIV/0!	#DIV/0!	#DIV/0!	0
						#DIV/0!		#DIV/0!															#DIV/0!	#DIV/0!	#DIV/0!	#DIV/0!	#DIV/0!	#DIV/0!	#DIV/0!	#DIV/0!	#DIV/0!	#DIV/0!	#DIV/0!	#DIV/0!	#DIV/0!	0	0	0	0	0	0	#DIV/0!	#DIV/0!	#DIV/0!	#DIV/0!	#DIV/0!	#DIV/0!	#DIV/0!	0
						#DIV/0!		#DIV/0!															#DIV/0!	#DIV/0!	#DIV/0!	#DIV/0!	#DIV/0!	#DIV/0!	#DIV/0!	#DIV/0!	#DIV/0!	#DIV/0!	#DIV/0!	#DIV/0!	#DIV/0!	0	0	0	0	0	0	#DIV/0!	#DIV/0!	#DIV/0!	#DIV/0!	#DIV/0!	#DIV/0!	#DIV/0!	0
						#DIV/0!		#DIV/0!															#DIV/0!	#DIV/0!	#DIV/0!	#DIV/0!	#DIV/0!	#DIV/0!	#DIV/0!	#DIV/0!	#DIV/0!	#DIV/0!	#DIV/0!	#DIV/0!	#DIV/0!	0	0	0	0	0	0	#DIV/0!	#DIV/0!	#DIV/0!	#DIV/0!	#DIV/0!	#DIV/0!	#DIV/0!	0
						#DIV/0!		#DIV/0!															#DIV/0!	#DIV/0!	#DIV/0!	#DIV/0!	#DIV/0!	#DIV/0!	#DIV/0!	#DIV/0!	#DIV/0!	#DIV/0!	#DIV/0!	#DIV/0!	#DIV/0!	0	0	0	0	0	0	#DIV/0!	#DIV/0!	#DIV/0!	#DIV/0!	#DIV/0!	#DIV/0!	#DIV/0!	0
						#DIV/0!		#DIV/0!															#DIV/0!	#DIV/0!	#DIV/0!	#DIV/0!	#DIV/0!	#DIV/0!	#DIV/0!	#DIV/0!	#DIV/0!	#DIV/0!	#DIV/0!	#DIV/0!	#DIV/0!	0	0	0	0	0	0	#DIV/0!	#DIV/0!	#DIV/0!	#DIV/0!	#DIV/0!	#DIV/0!	#DIV/0!	0
						#DIV/0!		#DIV/0!															#DIV/0!	#DIV/0!	#DIV/0!	#DIV/0!	#DIV/0!	#DIV/0!	#DIV/0!	#DIV/0!	#DIV/0!	#DIV/0!	#DIV/0!	#DIV/0!	#DIV/0!	0	0	0	0	0	0	#DIV/0!	#DIV/0!	#DIV/0!	#DIV/0!	#DIV/0!	#DIV/0!	#DIV/0!	0
						#DIV/0!		#DIV/0!															#DIV/0!	#DIV/0!	#DIV/0!	#DIV/0!	#DIV/0!	#DIV/0!	#DIV/0!	#DIV/0!	#DIV/0!	#DIV/0!	#DIV/0!	#DIV/0!	#DIV/0!	0	0	0	0	0	0	#DIV/0!	#DIV/0!	#DIV/0!	#DIV/0!	#DIV/0!	#DIV/0!	#DIV/0!	0
						#DIV/0!		#DIV/0!															#DIV/0!	#DIV/0!	#DIV/0!	#DIV/0!	#DIV/0!	#DIV/0!	#DIV/0!	#DIV/0!	#DIV/0!	#DIV/0!	#DIV/0!	#DIV/0!	#DIV/0!	0	0	0	0	0	0	#DIV/0!	#DIV/0!	#DIV/0!	#DIV/0!	#DIV/0!	#DIV/0!	#DIV/0!	0
						#DIV/0!		#DIV/0!															#DIV/0!	#DIV/0!	#DIV/0!	#DIV/0!	#DIV/0!	#DIV/0!	#DIV/0!	#DIV/0!	#DIV/0!	#DIV/0!	#DIV/0!	#DIV/0!	#DIV/0!	0	0	0	0	0	0	#DIV/0!	#DIV/0!	#DIV/0!	#DIV/0!	#DIV/0!	#DIV/0!	#DIV/0!	0
						#DIV/0!		#DIV/0!															#DIV/0!	#DIV/0!	#DIV/0!	#DIV/0!	#DIV/0!	#DIV/0!	#DIV/0!	#DIV/0!	#DIV/0!	#DIV/0!	#DIV/0!	#DIV/0!	#DIV/0!	0	0	0	0	0	0	#DIV/0!	#DIV/0!	#DIV/0!	#DIV/0!	#DIV/0!	#DIV/0!	#DIV/0!	0
						#DIV/0!		#DIV/0!															#DIV/0!	#DIV/0!	#DIV/0!	#DIV/0!	#DIV/0!	#DIV/0!	#DIV/0!	#DIV/0!	#DIV/0!	#DIV/0!	#DIV/0!	#DIV/0!	#DIV/0!	0	0	0	0	0	0	#DIV/0!	#DIV/0!	#DIV/0!	#DIV/0!	#DIV/0!	#DIV/0!	#DIV/0!	0
						#DIV/0!		#DIV/0!															#DIV/0!	#DIV/0!	#DIV/0!	#DIV/0!	#DIV/0!	#DIV/0!	#DIV/0!	#DIV/0!	#DIV/0!	#DIV/0!	#DIV/0!	#DIV/0!	#DIV/0!	0	0	0	0	0	0	#DIV/0!	#DIV/0!	#DIV/0!	#DIV/0!	#DIV/0!	#DIV/0!	#DIV/0!	0
						#DIV/0!		#DIV/0!															#DIV/0!	#DIV/0!	#DIV/0!	#DIV/0!	#DIV/0!	#DIV/0!	#DIV/0!	#DIV/0!	#DIV/0!	#DIV/0!	#DIV/0!	#DIV/0!	#DIV/0!	0	0	0	0	0	0	#DIV/0!	#DIV/0!	#DIV/0!	#DIV/0!	#DIV/0!	#DIV/0!	#DIV/0!	0
						#DIV/0!		#DIV/0!															#DIV/0!	#DIV/0!	#DIV/0!	#DIV/0!	#DIV/0!	#DIV/0!	#DIV/0!	#DIV/0!	#DIV/0!	#DIV/0!	#DIV/0!	#DIV/0!	#DIV/0!	0	0	0	0	0	0	#DIV/0!	#DIV/0!	#DIV/0!	#DIV/0!	#DIV/0!	#DIV/0!	#DIV/0!	0
						#DIV/0!		#DIV/0!															#DIV/0!	#DIV/0!	#DIV/0!	#DIV/0!	#DIV/0!	#DIV/0!	#DIV/0!	#DIV/0!	#DIV/0!	#DIV/0!	#DIV/0!	#DIV/0!	#DIV/0!	0	0	0	0	0	0	#DIV/0!	#DIV/0!	#DIV/0!	#DIV/0!	#DIV/0!	#DIV/0!	#DIV/0!	0
						#DIV/0!		#DIV/0!															#DIV/0!	#DIV/0!	#DIV/0!	#DIV/0!	#DIV/0!	#DIV/0!	#DIV/0!	#DIV/0!	#DIV/0!	#DIV/0!	#DIV/0!	#DIV/0!	#DIV/0!	0	0	0	0	0	0	#DIV/0!	#DIV/0!	#DIV/0!	#DIV/0!	#DIV/0!	#DIV/0!	#DIV/0!	0
						#DIV/0!		#DIV/0!															#DIV/0!	#DIV/0!	#DIV/0!	#DIV/0!	#DIV/0!	#DIV/0!	#DIV/0!	#DIV/0!	#DIV/0!	#DIV/0!	#DIV/0!	#DIV/0!	#DIV/0!	0	0	0	0	0	0	#DIV/0!	#DIV/0!	#DIV/0!	#DIV/0!	#DIV/0!	#DIV/0!	#DIV/0!	0
						#DIV/0!		#DIV/0!															#DIV/0!	#DIV/0!	#DIV/0!	#DIV/0!	#DIV/0!	#DIV/0!	#DIV/0!	#DIV/0!	#DIV/0!	#DIV/0!	#DIV/0!	#DIV/0!	#DIV/0!	0	0	0	0	0	0	#DIV/0!	#DIV/0!	#DIV/0!	#DIV/0!	#DIV/0!	#DIV/0!	#DIV/0!	0
						#DIV/0!		#DIV/0!															#DIV/0!	#DIV/0!	#DIV/0!	#DIV/0!	#DIV/0!	#DIV/0!	#DIV/0!	#DIV/0!	#DIV/0!	#DIV/0!	#DIV/0!	#DIV/0!	#DIV/0!	0	0	0	0	0	0	#DIV/0!	#DIV/0!	#DIV/0!	#DIV/0!	#DIV/0!	#DIV/0!	#DIV/0!	0
						#DIV/0!		#DIV/0!															#DIV/0!	#DIV/0!	#DIV/0!	#DIV/0!	#DIV/0!	#DIV/0!	#DIV/0!	#DIV/0!	#DIV/0!	#DIV/0!	#DIV/0!	#DIV/0!	#DIV/0!	0	0	0	0	0	0	#DIV/0!	#DIV/0!	#DIV/0!	#DIV/0!	#DIV/0!	#DIV/0!	#DIV/0!	0
						#DIV/0!		#DIV/0!															#DIV/0!	#DIV/0!	#DIV/0!	#DIV/0!	#DIV/0!	#DIV/0!	#DIV/0!	#DIV/0!	#DIV/0!	#DIV/0!	#DIV/0!	#DIV/0!	#DIV/0!	0	0	0	0	0	0	#DIV/0!	#DIV/0!	#DIV/0!	#DIV/0!	#DIV/0!	#DIV/0!	#DIV/0!	0
						#DIV/0!		#DIV/0!															#DIV/0!	#DIV/0!	#DIV/0!	#DIV/0!	#DIV/0!	#DIV/0!	#DIV/0!	#DIV/0!	#DIV/0!	#DIV/0!	#DIV/0!	#DIV/0!	#DIV/0!	0	0	0	0	0	0	#DIV/0!	#DIV/0!	#DIV/0!	#DIV/0!	#DIV/0!	#DIV/0!	#DIV/0!	0
						#DIV/0!		#DIV/0!															#DIV/0!	#DIV/0!	#DIV/0!	#DIV/0!	#DIV/0!	#DIV/0!	#DIV/0!	#DIV/0!	#DIV/0!	#DIV/0!	#DIV/0!	#DIV/0!	#DIV/0!	0	0	0	0	0	0	#DIV/0!	#DIV/0!	#DIV/0!	#DIV/0!	#DIV/0!	#DIV/0!	#DIV/0!	0
						#DIV/0!		#DIV/0!															#DIV/0!	#DIV/0!	#DIV/0!	#DIV/0!	#DIV/0!	#DIV/0!	#DIV/0!	#DIV/0!	#DIV/0!	#DIV/0!	#DIV/0!	#DIV/0!	#DIV/0!	0	0	0	0	0	0	#DIV/0!	#DIV/0!	#DIV/0!	#DIV/0!	#DIV/0!	#DIV/0!	#DIV/0!	0
						#DIV/0!		#DIV/0!															#DIV/0!	#DIV/0!	#DIV/0!	#DIV/0!	#DIV/0!	#DIV/0!	#DIV/0!	#DIV/0!	#DIV/0!	#DIV/0!	#DIV/0!	#DIV/0!	#DIV/0!	0	0	0	0	0	0	#DIV/0!	#DIV/0!	#DIV/0!	#DIV/0!	#DIV/0!	#DIV/0!	#DIV/0!	0
						#DIV/0!		#DIV/0!															#DIV/0!	#DIV/0!	#DIV/0!	#DIV/0!	#DIV/0!	#DIV/0!	#DIV/0!	#DIV/0!	#DIV/0!	#DIV/0!	#DIV/0!	#DIV/0!	#DIV/0!	0	0	0	0	0	0	#DIV/0!	#DIV/0!	#DIV/0!	#DIV/0!	#DIV/0!	#DIV/0!	#DIV/0!	0
						#DIV/0!		#DIV/0!															#DIV/0!	#DIV/0!	#DIV/0!	#DIV/0!	#DIV/0!	#DIV/0!	#DIV/0!	#DIV/0!	#DIV/0!	#DIV/0!	#DIV/0!	#DIV/0!	#DIV/0!	0	0	0	0	0	0	#DIV/0!	#DIV/0!	#DIV/0!	#DIV/0!	#DIV/0!	#DIV/0!	#DIV/0!	0
						#DIV/0!		#DIV/0!															#DIV/0!	#DIV/0!	#DIV/0!	#DIV/0!	#DIV/0!	#DIV/0!	#DIV/0!	#DIV/0!	#DIV/0!	#DIV/0!	#DIV/0!	#DIV/0!	#DIV/0!	0	0	0	0	0	0	#DIV/0!	#DIV/0!	#DIV/0!	#DIV/0!	#DIV/0!	#DIV/0!	#DIV/0!	0
						#DIV/0!		#DIV/0!															#DIV/0!	#DIV/0!	#DIV/0!	#DIV/0!	#DIV/0!	#DIV/0!	#DIV/0!	#DIV/0!	#DIV/0!	#DIV/0!	#DIV/0!	#DIV/0!	#DIV/0!	0	0	0	0	0	0	#DIV/0!	#DIV/0!	#DIV/0!	#DIV/0!	#DIV/0!	#DIV/0!	#DIV/0!	0
						#DIV/0!		#DIV/0!															#DIV/0!	#DIV/0!	#DIV/0!	#DIV/0!	#DIV/0!	#DIV/0!	#DIV/0!	#DIV/0!	#DIV/0!	#DIV/0!	#DIV/0!	#DIV/0!	#DIV/0!	0	0	0	0	0	0	#DIV/0!	#DIV/0!	#DIV/0!	#DIV/0!	#DIV/0!	#DIV/0!	#DIV/0!	0
						#DIV/0!		#DIV/0!
						#DIV/0!		#DIV/0!
						#DIV/0!		#DIV/0!
						#DIV/0!		#DIV/0!
						#DIV/0!		#DIV/0!
						#DIV/0!		#DIV/0!
						#DIV/0!		#DIV/0!
						#DIV/0!		#DIV/0!
						#DIV/0!		#DIV/0!
						#DIV/0!		#DIV/0!
						#DIV/0!		#DIV/0!
						#DIV/0!		#DIV/0!
						#DIV/0!		#DIV/0!
						#DIV/0!		#DIV/0!
						#DIV/0!		#DIV/0!
[truncated: 33 more columns]

## Sheet: Site2
Date:	17/8/2014
Site No. :	2V23
			Width (m)	Length (m)	Area (ha)			Length (m)
	Transect Dimensions:		10	50	0.05
	Co-ordinates:			X	Y			X
			NW Corner
			SW Corner
			NE Corner
			SE Corner
									OED		OUD	NED		NUD	NFD	OFD	OBE	OBU	NBE	NBU	RE	Notes	Canopy volume (m3)																				Damage
Trans. No.	Sp. Code	Coppice	Height (m)	D1 (m)	D2 (m)	R	Shape	Adj. shape	Score	Eaten		Score	Eaten										Total	0.5	1	2	3	4	5	0.5	1	2	3	4	5	OED	OUD	NED	NUD	NFD	OFD	Old Rec. Vol.	OED	OUD	NED	NUD	NFD	OFD	Sp. Code
1	Dic cin	T	0.6	0.33	0.5	0.2075	3	3			1												0.027026	0.0269009	0.0350337	0.370356	1.75669	4.94475	10.6853	0.0269009	0.027026	0.027026	0.027026	0.027026	0.027026	0	5.5	0	0	0	0	0.0285989	0	0.157294	0	0	0	0	Dic cin
1	Gre bic	T	0.35	1	0.96	0.49	3	3	4			4											0.0879132	0.0948335	0.651019	9.29881	38.2461	99.7956	206.25	0.0879132	0.0879132	0.0879132	0.0879132	0.0879132	0.0879132	63	0	63	0	0	0	0.237603	14.969	0	14.969	0	0	0	Gre bic
1	Gre bic	T	0.8	1.31	1.21	0.63	3	3	4			3											0.332174	0.314657	0.337364	1.45326	7.24035	21.5913	48.3987	0.314657	0.332174	0.332174	0.332174	0.332174	0.332174	63	0	38	0	0	0	0.897767	56.5593	0	20.359	0	0	0	Gre bic
1	Gre bic	T	1.2	1.42	1.23	0.6625	3	3	4														0.550994	0.441624	0.548443	0.714252	2.4106	7.55066	18.0476	0.441624	0.548443	0.550994	0.550994	0.550994	0.550994	63	0	0	0	0	0	1.48917	93.818	0	0	0	0	0	Gre bic
1	Gre bic	T	1.55	1.46	1.29	0.6875	3	3	4														0.766428	0.528172	0.732185	0.785183	1.39388	3.79316	9.21792	0.528172	0.732185	0.766428	0.766428	0.766428	0.766428	63	0	0	0	0	0	2.07143	130.5	0	0	0	0	0	Gre bic
1	Ere amo	T	0.55	0.56	0.41	0.2425	3	3			1												0.0338361	0.0338107	0.0523684	0.653843	3.02466	8.38505	17.9552	0.0338107	0.0338361	0.0338361	0.0338361	0.0338361	0.0338361	0	5.5	0	0	0	0	0.0358054	0	0.19693	0	0	0	0	Ere amo
1	Gre bic	T	1.75	2.04	2.11	1.0375	3	3	4			2											1.97064	1.25248	1.81552	1.97639	2.68881	6.15898	14.5931	1.25248	1.81552	1.97064	1.97064	1.97064	1.97064	63	0	18	0	0	0	5.32607	335.542	0	43.2581	0	0	0	Gre bic
1	Gre fla	T	0.8	1	0.69	0.4225	3	3			1												0.149396	0.141517	0.15173	0.653605	3.25636	9.71071	21.7674	0.141517	0.149396	0.149396	0.149396	0.149396	0.149396	0	5.5	0	0	0	0	0.15809	0	0.869498	0	0	0	0	Gre fla
1	Dic cin	T	1	0.61	0.74	0.3375	3	3			1												0.119163	0.104268	0.119163	0.238326	1.07247	3.33657	7.7456	0.104268	0.119163	0.119163	0.119163	0.119163	0.119163	0	5.5	0	0	0	0	0.126098	0	0.693542	0	0	0	0	Dic cin
1	Gre bic	T	0.9	2.4	1.86	1.065	3	3	4			4											1.06791	0.974159	1.06938	3.0177	14.6344	44.7088	102.03	0.974159	1.06791	1.06791	1.06791	1.06791	1.06791	63	0	63	0	0	0	2.88625	181.834	0	181.834	0	0	0	Gre bic
1	Gre bic	T	1.2	2.2	1.31	0.8775	3	3	3			4											0.966651	0.774775	0.962176	1.25307	4.2291	13.2467	31.6623	0.774775	0.962176	0.966651	0.966651	0.966651	0.966651	38	0	63	0	0	0	1.55911	59.2463	0	164.592	0	0	0	Gre bic
1	Gre mon	T	0.7	1.2	1.1	0.575	3	3	1			4											0.242118	0.236471	0.261177	1.79295	8.83062	25.6095	56.3649	0.236471	0.242118	0.242118	0.242118	0.242118	0.242118	5.5	0	63	0	0	0	0.25621	1.40915	0	41.2256	0	0	0	Gre mon
1	Gre mon	T	2.2	2.71	1.86	1.1425	3	3	3			2											3.0042	1.61806	2.51667	3.00195	3.14866	4.64963	9.19769	1.61806	2.51667	3.00195	3.0042	3.0042	3.0042	38	0	18	0	0	0	4.84549	184.129	0	65.9459	0	0	0	Gre mon
1	Gre mon	T	2.2	2.5	2.11	1.1525	3	3	3														3.05702	1.64651	2.56092	3.05473	3.20402	4.73138	9.3594	1.64651	2.56092	3.05473	3.05702	3.05702	3.05702	38	0	0	0	0	0	4.93068	187.366	0	0	0	0	0	Gre mon
1	Gre mon	T	1.8	1.52	1.53	0.7625	3	3	3														1.09483	0.682391	0.998712	1.09633	1.41922	3.09376	7.2463	0.682391	0.998712	1.09483	1.09483	1.09483	1.09483	38	0	0	0	0	0	1.76585	67.1024	0	0	0	0	0	Gre mon
1	Gre mon	T	1.6	1.96	1.41	0.8425	3	3	3														1.1881	0.802027	1.12545	1.20667	1.98404	5.19795	12.5888	0.802027	1.12545	1.1881	1.1881	1.1881	1.1881	38	0	0	0	0	0	1.91629	72.8192	0	0	0	0	0	Gre mon
1	Gre mon	T	1.35	1.36	1.31	0.6675	3	3			1												0.62926	0.472193	0.618295	0.699498	1.77816	5.38882	13.066	0.472193	0.618295	0.62926	0.62926	0.62926	0.62926	0	5.5	0	0	0	0	0.665884	0	3.66236	0	0	0	0	Gre mon
1	Gre mon	T	1.8	1.6	2.13	0.9325	3	3	3			2											1.63744	1.02059	1.49368	1.63968	2.1226	4.62705	10.8376	1.02059	1.49368	1.63744	1.63744	1.63744	1.63744	38	0	18	0	0	0	2.64103	100.359	0	35.9437	0	0	0	Gre mon
1	Gre mon	T	0.9	1.22	0.83	0.5125	3	3	4			4											0.2473	0.225589	0.247639	0.698818	3.38893	10.3534	23.6275	0.225589	0.2473	0.2473	0.2473	0.2473	0.2473	63	0	63	0	0	0	0.668379	42.1079	0	42.1079	0	0	0	Gre mon
1	Gre mon	T	1.8	2.15	2.41	1.14	3	3	2														2.44724	1.52533	2.23239	2.4506	3.17235	6.91538	16.1974	1.52533	2.23239	2.44724	2.44724	2.44724	2.44724	18	0	0	0	0	0	2.98444	53.7199	0	0	0	0	0	Gre mon
1	Gre mon	T	2	2.22	1.92	1.035	3	3	3														2.24132	1.29577	1.96116	2.24132	2.52149	4.48265	9.8058	1.29577	1.96116	2.24132	2.24132	2.24132	2.24132	38	0	0	0	0	0	3.61504	137.372	0	0	0	0	0	Gre mon
1	Gre mon	T	0.7	0.76	1.1	0.465	3	3	4			3											0.158343	0.15465	0.170807	1.17257	5.77512	16.7483	36.862	0.15465	0.158343	0.158343	0.158343	0.158343	0.158343	63	0	38	0	0	0	0.427953	26.9611	0	9.70488	0	0	0	Gre mon
1	Gre mon	T	0.7	1.81	1.57	0.845	3	3	2			3											0.522884	0.510689	0.564044	3.87209	19.0708	55.3068	121.727	0.510689	0.522884	0.522884	0.522884	0.522884	0.522884	18	0	38	0	0	0	0.637664	11.4779	0	32.0477	0	0	0	Gre mon
1	Dic cin	T	0.95	1.03	0.81	0.46	3	3			1												0.210297	0.187946	0.210328	0.49424	2.32342	7.16954	16.5043	0.187946	0.210297	0.210297	0.210297	0.210297	0.210297	0	5.5	0	0	0	0	0.222537	0	1.22395	0	0	0	0	Dic cin
1	Gre mon	T	1.9	2.71	2.05	1.19	3	3	2			1											2.81476	1.68869	2.5156	2.81517	3.36097	6.61524	15.0402	1.68869	2.5156	2.81476	2.81476	2.81476	2.81476	18	0	5.5	0	0	0	3.43264	61.7875	0	16.3822	0	0	0	Gre mon
1	Gre mon	T	1.7	2.5	2.5	1.25	3	3	4			1											2.77884	1.80146	2.58483	2.79411	4.02148	9.6606	23.1051	1.80146	2.58483	2.77884	2.77884	2.77884	2.77884	63	0	5.5	0	0	0	7.51037	473.153	0	16.1731	0	0	0	Gre mon
1	Gre mon	T	1.8	2.13	2.23	1.09	3	3	4			1											2.23728	1.39446	2.04086	2.24035	2.90017	6.32207	14.8078	1.39446	2.04086	2.23728	2.23728	2.23728	2.23728	63	0	5.5	0	0	0	6.04669	380.942	0	13.0212	0	0	0	Gre mon
1	Gre bic	T	2.2	3.05	1.75	1.2	3	3	2		4												3.3142	1.78503	2.77636	3.31171	3.47357	5.12942	10.1468	1.78503	2.77636	3.31171	3.3142	3.3142	3.3142	18	63	0	0	0	0	17.4432	313.977	1098.92	0	0	0	0	Gre bic
1	Gre mon	T	1.7	1.46	1.56	0.755	3	3	2														1.01376	0.657203	0.942988	1.01934	1.4671	3.52434	8.42912	0.657203	0.942988	1.01376	1.01376	1.01376	1.01376	18	0	0	0	0	0	1.2363	22.2534	0	0	0	0	0	Gre mon
1	Gre bic	T	2.4	1.84	3.05	1.2225	3	3	4														3.75235	1.89056	3.00752	3.73498	3.81098	4.86415	8.52313	1.89056	3.00752	3.73498	3.75235	3.75235	3.75235	63	0	0	0	0	0	10.1415	638.913	0	0	0	0	0	Gre bic
1	Gre bic	T	2.8	3.41	2.7	1.5275	3	3	2														6.83462	3.0465	5.01887	6.67522	6.83711	7.37263	10.1498	3.0465	5.01887	6.67522	6.83462	6.83462	6.83462	18	0	0	0	0	0	8.33491	150.028	0	0	0	0	0	Gre bic
1	Gre mon	T	2.2	3.11	2.63	1.435	3	3	3			1											4.73937	2.55262	3.97025	4.73581	4.96726	7.33516	14.5101	2.55262	3.97025	4.73581	4.73937	4.73937	4.73937	38	0	5.5	0	0	0	7.64414	290.477	0	27.5836	0	0	0	Gre mon
1	Gre mon	T	2.4	2.91	2.84	1.4375	3	3	3			2											5.18825	2.61402	4.15841	5.16423	5.26932	6.72551	11.7847	2.61402	4.15841	5.16423	5.18825	5.18825	5.18825	38	0	18	0	0	0	8.36815	317.99	0	113.888	0	0	0	Gre mon
1	Gre bic	T	1.1	1.8	1.14	0.735	3	3	4														0.621672	0.520785	0.621205	0.962167	3.82532	12.0131	28.3279	0.520785	0.621205	0.621672	0.621672	0.621672	0.621672	63	0	0	0	0	0	1.6802	105.852	0	0	0	0	0	Gre bic
1	Aca tor	T	0.7	1	1.01	0.5025	3	3															0.184912	0.180599	0.199467	1.36932	6.74415	19.5586	43.0472	0.180599	0.184912	0.184912	0.184912	0.184912	0.184912	0	0	0	0	0	0	0.184912	0	0	0	0	0	0	Aca tor
1	Gre mon	T	0.95	1.85	1.4	0.8125	3	3	4			2											0.656092	0.58636	0.656187	1.54194	7.24867	22.3678	51.4906	0.58636	0.656092	0.656092	0.656092	0.656092	0.656092	63	0	18	0	0	0	1.77322	111.713	0	14.402	0	0	0	Gre mon
1	Gre lep	T	0.6	0.26	0.48	0.185	3	3			1												0.0214827	0.0213832	0.0278479	0.294393	1.39638	3.93054	8.49362	0.0213832	0.0214827	0.0214827	0.0214827	0.0214827	0.0214827	0	5.5	0	0	0	0	0.022733	0	0.125032	0	0	0	0	Gre lep
1	Gre bic	T	1.7	1.96	2.95	1.2275	3	3	4			3											2.6797	1.7372	2.49262	2.69443	3.87801	9.31595	22.2808	1.7372	2.49262	2.6797	2.6797	2.6797	2.6797	63	0	38	0	0	0	7.24243	456.273	0	164.24	0	0	0	Gre bic
1	Cap sep	T	0.5	1.51	0.62	0.5325	3	3	2														0.148321	0.148321	0.296642	4.15299	18.6885	51.0225	108.275	0.148321	0.148321	0.148321	0.148321	0.148321	0.148321	18	0	0	0	0	0	0.18088	3.25583	0	0	0	0	0	Cap sep
1	Mae par	T	0.05	0.41	0.25	0.165	6	1															0.00427649	0.0427649	0.0855299	0.17106	0.25659	0.342119	0.427649	0.00427649	0.00427649	0.00427649	0.00427649	0.00427649	0.00427649	0	0	0	0	0	0	0.00427649	0	0	0	0	0	0	Mae par
1	Cap sep	T	0.8	3	3.45	1.6125	6	1			1												6.53491	4.08432	8.16863	16.3373	24.5059	32.6745	40.8432	4.08432	6.53491	6.53491	6.53491	6.53491	6.53491	0	5.5	0	0	0	0	6.91524	0	38.0338	0	0	0	0	Cap sep
1	Gre bic	T	0.5	0.42	0.5	0.23	3	3															0.0276707	0.0276707	0.0553414	0.774779	3.48651	9.51871	20.1996	0.0276707	0.0276707	0.0276707	0.0276707	0.0276707	0.0276707	0	0	0	0	0	0	0.0276707	0	0	0	0	0	0	Gre bic
1	Gre bic	T	1.7	2.22	1.93	1.0375	3	3	4			2											1.91434	1.24103	1.78069	1.92486	2.7704	6.65519	15.9171	1.24103	1.78069	1.91434	1.91434	1.91434	1.91434	63	0	18	0	0	0	5.17389	325.955	0	42.0221	0	0	0	Gre bic
1	Cap sep	T	0.55	0.46	0.4	0.215	3	3			1												0.0265971	0.0265771	0.0411645	0.513957	2.37755	6.59112	14.1138	0.0265771	0.0265971	0.0265971	0.0265971	0.0265971	0.0265971	0	5.5	0	0	0	0	0.028145	0	0.154798	0	0	0	0	Cap sep
1	Mae par	T	0.1	0.45	0.42	0.2175	6	1															0.0148617	0.0743085	0.148617	0.297234	0.445851	0.594468	0.743085	0.0148617	0.0148617	0.0148617	0.0148617	0.0148617	0.0148617	0	0	0	0	0	0	0.0148617	0	0	0	0	0	0	Mae par
1	Gre fla	T	1.5	1.72	1.72	0.86	3	3	4														1.1606	0.816718	1.11761	1.20358	2.3212	6.53374	15.9045	0.816718	1.11761	1.1606	1.1606	1.1606	1.1606	63	0	0	0	0	0	3.13675	197.616	0	0	0	0	0	Gre fla
1	Gre mon	T	1.4	2.5	1.82	1.08	3	3	4														1.70832	1.25447	1.66848	1.8428	4.25835	12.6505	30.7548	1.25447	1.66848	1.70832	1.70832	1.70832	1.70832	63	0	0	0	0	0	4.61709	290.876	0	0	0	0	0	Gre mon
1	Gre lep	T	0.8	1.15	0.71	0.465	3	3			3												0.180963	0.17142	0.183791	0.791714	3.94443	11.7626	26.3669	0.17142	0.180963	0.180963	0.180963	0.180963	0.180963	0	38	0	0	0	0	0.291876	0	11.0913	0	0	0	0	Gre lep
1	Gre mon	T	0.8	1.25	0.7	0.4875	3	3	3														0.198899	0.188411	0.202007	0.870185	4.33538	12.9285	28.9803	0.188411	0.198899	0.198899	0.198899	0.198899	0.198899	38	0	0	0	0	0	0.320805	12.1906	0	0	0	0	0	Gre mon
1	Gre fla	T	2.2	1.81	2.21	1.005	3	3	2														2.3246	1.25203	1.94736	2.32286	2.43638	3.59781	7.11702	1.25203	1.94736	2.32286	2.3246	2.3246	2.3246	18	0	0	0	0	0	2.83488	51.0279	0	0	0	0	0	Gre fla
1	Mae par	T	0.15	0.21	0.12	0.0825	3	3															0.00106805	0.0146363	0.195414	2.00478	7.32685	18.0604	36.1042	0.00106805	0.00106805	0.00106805	0.00106805	0.00106805	0.00106805	0	0	0	0	0	0	0.00106805	0	0	0	0	0	0	Mae par
1	Mae par	T	0.1	0.12	0.1	0.055	1	1															0.000950332	0.00475166	0.00950332	0.0190066	0.02851	0.0380133	0.0475166	0.000950332	0.000950332	0.000950332	0.000950332	0.000950332	0.000950332	0	0	0	0	0	0	0.000950332	0	0	0	0	0	0	Mae par
1	Mae par	T	0.12	0.14	0.1	0.06	1	1															0.00135717	0.00565487	0.0113097	0.0226195	0.0339292	0.0452389	0.0565487	0.00135717	0.00135717	0.00135717	0.00135717	0.00135717	0.00135717	0	0	0	0	0	0	0.00135717	0	0	0	0	0	0	Mae par
1	Mae par	T	0.2	0.28	0.2	0.12	3	3															0.00301291	0.0131815	0.195839	2.19943	8.27045	20.6686	41.6535	0.00301291	0.00301291	0.00301291	0.00301291	0.00301291	0.00301291	0	0	0	0	0	0	0.00301291	0	0	0	0	0	0	Mae par
1	Gre mon	T	1.05	0.99	0.92	0.4775	3	3	4														0.250455	0.21446	0.250428	0.435951	1.85468	5.80474	13.5842	0.21446	0.250428	0.250455	0.250455	0.250455	0.250455	63	0	0	0	0	0	0.676906	42.6451	0	0	0	0	0	Gre mon
1	Mae par	T	0.45	0.43	0.45	0.22	3	3			1												0.0227852	0.0228164	0.064386	0.953913	4.16884	11.2094	23.5759	0.0227852	0.0227852	0.0227852	0.0227852	0.0227852	0.0227852	0	5.5	0	0	0	0	0.0241113	0	0.132612	0	0	0	0	Mae par
1	Dic cin	T	0.5	0.39	0.3	0.1725	3	3															0.0155648	0.0155648	0.0311295	0.435813	1.96116	5.35428	11.3623	0.0155648	0.0155648	0.0155648	0.0155648	0.0155648	0.0155648	0	0	0	0	0	0	0.0155648	0	0	0	0	0	0	Dic cin
1	Gre bic	T	0.9	0.92	1	0.48	3	3	3														0.21693	0.197885	0.217227	0.612998	2.97274	9.08189	20.7259	0.197885	0.21693	0.21693	0.21693	0.21693	0.21693	38	0	0	0	0	0	0.349887	13.2957	0	0	0	0	0	Gre bic
1	Mae par	T	0.2	0.2	0.28	0.12	3	3															0.00301291	0.0131815	0.195839	2.19943	8.27045	20.6686	41.6535	0.00301291	0.00301291	0.00301291	0.00301291	0.00301291	0.00301291	0	0	0	0	0	0	0.00301291	0	0	0	0	0	0	Mae par
1	Mae par	T	0.55	0.25	0.26	0.1275	1	1															0.0280888	0.0255353	0.0510705	0.102141	0.153212	0.204282	0.255353	0.0255353	0.0280888	0.0280888	0.0280888	0.0280888	0.0280888	0	0	0	0	0	0	0.0280888	0	0	0	0	0	0	Mae par
1	Gre mon	T	0.9	1.4	0.81	0.5525	3	3	4			4											0.28741	0.262177	0.287804	0.812159	3.93858	12.0326	27.4596	0.262177	0.28741	0.28741	0.28741	0.28741	0.28741	63	0	63	0	0	0	0.776783	48.9373	0	48.9373	0	0	0	Gre mon
						#DIV/0!		#DIV/0!															#DIV/0!	#DIV/0!	#DIV/0!	#DIV/0!	#DIV/0!	#DIV/0!	#DIV/0!	#DIV/0!	#DIV/0!	#DIV/0!	#DIV/0!	#DIV/0!	#DIV/0!	0	0	0	0	0	0	#DIV/0!	#DIV/0!	#DIV/0!	#DIV/0!	#DIV/0!	#DIV/0!	#DIV/0!	0
						#DIV/0!		#DIV/0!															#DIV/0!	#DIV/0!	#DIV/0!	#DIV/0!	#DIV/0!	#DIV/0!	#DIV/0!	#DIV/0!	#DIV/0!	#DIV/0!	#DIV/0!	#DIV/0!	#DIV/0!	0	0	0	0	0	0	#DIV/0!	#DIV/0!	#DIV/0!	#DIV/0!	#DIV/0!	#DIV/0!	#DIV/0!	0
						#DIV/0!		#DIV/0!															#DIV/0!	#DIV/0!	#DIV/0!	#DIV/0!	#DIV/0!	#DIV/0!	#DIV/0!	#DIV/0!	#DIV/0!	#DIV/0!	#DIV/0!	#DIV/0!	#DIV/0!	0	0	0	0	0	0	#DIV/0!	#DIV/0!	#DIV/0!	#DIV/0!	#DIV/0!	#DIV/0!	#DIV/0!	0
						#DIV/0!		#DIV/0!															#DIV/0!	#DIV/0!	#DIV/0!	#DIV/0!	#DIV/0!	#DIV/0!	#DIV/0!	#DIV/0!	#DIV/0!	#DIV/0!	#DIV/0!	#DIV/0!	#DIV/0!	0	0	0	0	0	0	#DIV/0!	#DIV/0!	#DIV/0!	#DIV/0!	#DIV/0!	#DIV/0!	#DIV/0!	0
						#DIV/0!		#DIV/0!															#DIV/0!	#DIV/0!	#DIV/0!	#DIV/0!	#DIV/0!	#DIV/0!	#DIV/0!	#DIV/0!	#DIV/0!	#DIV/0!	#DIV/0!	#DIV/0!	#DIV/0!	0	0	0	0	0	0	#DIV/0!	#DIV/0!	#DIV/0!	#DIV/0!	#DIV/0!	#DIV/0!	#DIV/0!	0
						#DIV/0!		#DIV/0!															#DIV/0!	#DIV/0!	#DIV/0!	#DIV/0!	#DIV/0!	#DIV/0!	#DIV/0!	#DIV/0!	#DIV/0!	#DIV/0!	#DIV/0!	#DIV/0!	#DIV/0!	0	0	0	0	0	0	#DIV/0!	#DIV/0!	#DIV/0!	#DIV/0!	#DIV/0!	#DIV/0!	#DIV/0!	0
						#DIV/0!		#DIV/0!															#DIV/0!	#DIV/0!	#DIV/0!	#DIV/0!	#DIV/0!	#DIV/0!	#DIV/0!	#DIV/0!	#DIV/0!	#DIV/0!	#DIV/0!	#DIV/0!	#DIV/0!	0	0	0	0	0	0	#DIV/0!	#DIV/0!	#DIV/0!	#DIV/0!	#DIV/0!	#DIV/0!	#DIV/0!	0
						#DIV/0!		#DIV/0!															#DIV/0!	#DIV/0!	#DIV/0!	#DIV/0!	#DIV/0!	#DIV/0!	#DIV/0!	#DIV/0!	#DIV/0!	#DIV/0!	#DIV/0!	#DIV/0!	#DIV/0!	0	0	0	0	0	0	#DIV/0!	#DIV/0!	#DIV/0!	#DIV/0!	#DIV/0!	#DIV/0!	#DIV/0!	0
						#DIV/0!		#DIV/0!															#DIV/0!	#DIV/0!	#DIV/0!	#DIV/0!	#DIV/0!	#DIV/0!	#DIV/0!	#DIV/0!	#DIV/0!	#DIV/0!	#DIV/0!	#DIV/0!	#DIV/0!	0	0	0	0	0	0	#DIV/0!	#DIV/0!	#DIV/0!	#DIV/0!	#DIV/0!	#DIV/0!	#DIV/0!	0
						#DIV/0!		#DIV/0!															#DIV/0!	#DIV/0!	#DIV/0!	#DIV/0!	#DIV/0!	#DIV/0!	#DIV/0!	#DIV/0!	#DIV/0!	#DIV/0!	#DIV/0!	#DIV/0!	#DIV/0!	0	0	0	0	0	0	#DIV/0!	#DIV/0!	#DIV/0!	#DIV/0!	#DIV/0!	#DIV/0!	#DIV/0!	0
						#DIV/0!		#DIV/0!															#DIV/0!	#DIV/0!	#DIV/0!	#DIV/0!	#DIV/0!	#DIV/0!	#DIV/0!	#DIV/0!	#DIV/0!	#DIV/0!	#DIV/0!	#DIV/0!	#DIV/0!	0	0	0	0	0	0	#DIV/0!	#DIV/0!	#DIV/0!	#DIV/0!	#DIV/0!	#DIV/0!	#DIV/0!	0
						#DIV/0!		#DIV/0!															#DIV/0!	#DIV/0!	#DIV/0!	#DIV/0!	#DIV/0!	#DIV/0!	#DIV/0!	#DIV/0!	#DIV/0!	#DIV/0!	#DIV/0!	#DIV/0!	#DIV/0!	0	0	0	0	0	0	#DIV/0!	#DIV/0!	#DIV/0!	#DIV/0!	#DIV/0!	#DIV/0!	#DIV/0!	0
						#DIV/0!		#DIV/0!															#DIV/0!	#DIV/0!	#DIV/0!	#DIV/0!	#DIV/0!	#DIV/0!	#DIV/0!	#DIV/0!	#DIV/0!	#DIV/0!	#DIV/0!	#DIV/0!	#DIV/0!	0	0	0	0	0	0	#DIV/0!	#DIV/0!	#DIV/0!	#DIV/0!	#DIV/0!	#DIV/0!	#DIV/0!	0
						#DIV/0!		#DIV/0!															#DIV/0!	#DIV/0!	#DIV/0!	#DIV/0!	#DIV/0!	#DIV/0!	#DIV/0!	#DIV/0!	#DIV/0!	#DIV/0!	#DIV/0!	#DIV/0!	#DIV/0!	0	0	0	0	0	0	#DIV/0!	#DIV/0!	#DIV/0!	#DIV/0!	#DIV/0!	#DIV/0!	#DIV/0!	0
						#DIV/0!		#DIV/0!															#DIV/0!	#DIV/0!	#DIV/0!	#DIV/0!	#DIV/0!	#DIV/0!	#DIV/0!	#DIV/0!	#DIV/0!	#DIV/0!	#DIV/0!	#DIV/0!	#DIV/0!	0	0	0	0	0	0	#DIV/0!	#DIV/0!	#DIV/0!	#DIV/0!	#DIV/0!	#DIV/0!	#DIV/0!	0
						#DIV/0!		#DIV/0!															#DIV/0!	#DIV/0!	#DIV/0!	#DIV/0!	#DIV/0!	#DIV/0!	#DIV/0!	#DIV/0!	#DIV/0!	#DIV/0!	#DIV/0!	#DIV/0!	#DIV/0!	0	0	0	0	0	0	#DIV/0!	#DIV/0!	#DIV/0!	#DIV/0!	#DIV/0!	#DIV/0!	#DIV/0!	0
						#DIV/0!		#DIV/0!															#DIV/0!	#DIV/0!	#DIV/0!	#DIV/0!	#DIV/0!	#DIV/0!	#DIV/0!	#DIV/0!	#DIV/0!	#DIV/0!	#DIV/0!	#DIV/0!	#DIV/0!	0	0	0	0	0	0	#DIV/0!	#DIV/0!	#DIV/0!	#DIV/0!	#DIV/0!	#DIV/0!	#DIV/0!	0
						#DIV/0!		#DIV/0!															#DIV/0!	#DIV/0!	#DIV/0!	#DIV/0!	#DIV/0!	#DIV/0!	#DIV/0!	#DIV/0!	#DIV/0!	#DIV/0!	#DIV/0!	#DIV/0!	#DIV/0!	0	0	0	0	0	0	#DIV/0!	#DIV/0!	#DIV/0!	#DIV/0!	#DIV/0!	#DIV/0!	#DIV/0!	0
						#DIV/0!		#DIV/0!															#DIV/0!	#DIV/0!	#DIV/0!	#DIV/0!	#DIV/0!	#DIV/0!	#DIV/0!	#DIV/0!	#DIV/0!	#DIV/0!	#DIV/0!	#DIV/0!	#DIV/0!	0	0	0	0	0	0	#DIV/0!	#DIV/0!	#DIV/0!	#DIV/0!	#DIV/0!	#DIV/0!	#DIV/0!	0
						#DIV/0!		#DIV/0!															#DIV/0!	#DIV/0!	#DIV/0!	#DIV/0!	#DIV/0!	#DIV/0!	#DIV/0!	#DIV/0!	#DIV/0!	#DIV/0!	#DIV/0!	#DIV/0!	#DIV/0!	0	0	0	0	0	0	#DIV/0!	#DIV/0!	#DIV/0!	#DIV/0!	#DIV/0!	#DIV/0!	#DIV/0!	0
						#DIV/0!		#DIV/0!															#DIV/0!	#DIV/0!	#DIV/0!	#DIV/0!	#DIV/0!	#DIV/0!	#DIV/0!	#DIV/0!	#DIV/0!	#DIV/0!	#DIV/0!	#DIV/0!	#DIV/0!	0	0	0	0	0	0	#DIV/0!	#DIV/0!	#DIV/0!	#DIV/0!	#DIV/0!	#DIV/0!	#DIV/0!	0
						#DIV/0!		#DIV/0!															#DIV/0!	#DIV/0!	#DIV/0!	#DIV/0!	#DIV/0!	#DIV/0!	#DIV/0!	#DIV/0!	#DIV/0!	#DIV/0!	#DIV/0!	#DIV/0!	#DIV/0!	0	0	0	0	0	0	#DIV/0!	#DIV/0!	#DIV/0!	#DIV/0!	#DIV/0!	#DIV/0!	#DIV/0!	0
						#DIV/0!		#DIV/0!															#DIV/0!	#DIV/0!	#DIV/0!	#DIV/0!	#DIV/0!	#DIV/0!	#DIV/0!	#DIV/0!	#DIV/0!	#DIV/0!	#DIV/0!	#DIV/0!	#DIV/0!	0	0	0	0	0	0	#DIV/0!	#DIV/0!	#DIV/0!	#DIV/0!	#DIV/0!	#DIV/0!	#DIV/0!	0
						#DIV/0!		#DIV/0!															#DIV/0!	#DIV/0!	#DIV/0!	#DIV/0!	#DIV/0!	#DIV/0!	#DIV/0!	#DIV/0!	#DIV/0!	#DIV/0!	#DIV/0!	#DIV/0!	#DIV/0!	0	0	0	0	0	0	#DIV/0!	#DIV/0!	#DIV/0!	#DIV/0!	#DIV/0!	#DIV/0!	#DIV/0!	0
						#DIV/0!		#DIV/0!															#DIV/0!	#DIV/0!	#DIV/0!	#DIV/0!	#DIV/0!	#DIV/0!	#DIV/0!	#DIV/0!	#DIV/0!	#DIV/0!	#DIV/0!	#DIV/0!	#DIV/0!	0	0	0	0	0	0	#DIV/0!	#DIV/0!	#DIV/0!	#DIV/0!	#DIV/0!	#DIV/0!	#DIV/0!	0
						#DIV/0!		#DIV/0!															#DIV/0!	#DIV/0!	#DIV/0!	#DIV/0!	#DIV/0!	#DIV/0!	#DIV/0!	#DIV/0!	#DIV/0!	#DIV/0!	#DIV/0!	#DIV/0!	#DIV/0!	0	0	0	0	0	0	#DIV/0!	#DIV/0!	#DIV/0!	#DIV/0!	#DIV/0!	#DIV/0!	#DIV/0!	0
						#DIV/0!		#DIV/0!															#DIV/0!	#DIV/0!	#DIV/0!	#DIV/0!	#DIV/0!	#DIV/0!	#DIV/0!	#DIV/0!	#DIV/0!	#DIV/0!	#DIV/0!	#DIV/0!	#DIV/0!	0	0	0	0	0	0	#DIV/0!	#DIV/0!	#DIV/0!	#DIV/0!	#DIV/0!	#DIV/0!	#DIV/0!	0
						#DIV/0!		#DIV/0!															#DIV/0!	#DIV/0!	#DIV/0!	#DIV/0!	#DIV/0!	#DIV/0!	#DIV/0!	#DIV/0!	#DIV/0!	#DIV/0!	#DIV/0!	#DIV/0!	#DIV/0!	0	0	0	0	0	0	#DIV/0!	#DIV/0!	#DIV/0!	#DIV/0!	#DIV/0!	#DIV/0!	#DIV/0!	0
						#DIV/0!		#DIV/0!															#DIV/0!	#DIV/0!	#DIV/0!	#DIV/0!	#DIV/0!	#DIV/0!	#DIV/0!	#DIV/0!	#DIV/0!	#DIV/0!	#DIV/0!	#DIV/0!	#DIV/0!	0	0	0	0	0	0	#DIV/0!	#DIV/0!	#DIV/0!	#DIV/0!	#DIV/0!	#DIV/0!	#DIV/0!	0
						#DIV/0!		#DIV/0!															#DIV/0!	#DIV/0!	#DIV/0!	#DIV/0!	#DIV/0!	#DIV/0!	#DIV/0!	#DIV/0!	#DIV/0!	#DIV/0!	#DIV/0!	#DIV/0!	#DIV/0!	0	0	0	0	0	0	#DIV/0!	#DIV/0!	#DIV/0!	#DIV/0!	#DIV/0!	#DIV/0!	#DIV/0!	0
						#DIV/0!		#DIV/0!															#DIV/0!	#DIV/0!	#DIV/0!	#DIV/0!	#DIV/0!	#DIV/0!	#DIV/0!	#DIV/0!	#DIV/0!	#DIV/0!	#DIV/0!	#DIV/0!	#DIV/0!	0	0	0	0	0	0	#DIV/0!	#DIV/0!	#DIV/0!	#DIV/0!	#DIV/0!	#DIV/0!	#DIV/0!	0
						#DIV/0!		#DIV/0!															#DIV/0!	#DIV/0!	#DIV/0!	#DIV/0!	#DIV/0!	#DIV/0!	#DIV/0!	#DIV/0!	#DIV/0!	#DIV/0!	#DIV/0!	#DIV/0!	#DIV/0!	0	0	0	0	0	0	#DIV/0!	#DIV/0!	#DIV/0!	#DIV/0!	#DIV/0!	#DIV/0!	#DIV/0!	0
						#DIV/0!		#DIV/0!															#DIV/0!	#DIV/0!	#DIV/0!	#DIV/0!	#DIV/0!	#DIV/0!	#DIV/0!	#DIV/0!	#DIV/0!	#DIV/0!	#DIV/0!	#DIV/0!	#DIV/0!	0	0	0	0	0	0	#DIV/0!	#DIV/0!	#DIV/0!	#DIV/0!	#DIV/0!	#DIV/0!	#DIV/0!	0
						#DIV/0!		#DIV/0!															#DIV/0!	#DIV/0!	#DIV/0!	#DIV/0!	#DIV/0!	#DIV/0!	#DIV/0!	#DIV/0!	#DIV/0!	#DIV/0!	#DIV/0!	#DIV/0!	#DIV/0!	0	0	0	0	0	0	#DIV/0!	#DIV/0!	#DIV/0!	#DIV/0!	#DIV/0!	#DIV/0!	#DIV/0!	0
						#DIV/0!		#DIV/0!															#DIV/0!	#DIV/0!	#DIV/0!	#DIV/0!	#DIV/0!	#DIV/0!	#DIV/0!	#DIV/0!	#DIV/0!	#DIV/0!	#DIV/0!	#DIV/0!	#DIV/0!	0	0	0	0	0	0	#DIV/0!	#DIV/0!	#DIV/0!	#DIV/0!	#DIV/0!	#DIV/0!	#DIV/0!	0
						#DIV/0!		#DIV/0!															#DIV/0!	#DIV/0!	#DIV/0!	#DIV/0!	#DIV/0!	#DIV/0!	#DIV/0!	#DIV/0!	#DIV/0!	#DIV/0!	#DIV/0!	#DIV/0!	#DIV/0!	0	0	0	0	0	0	#DIV/0!	#DIV/0!	#DIV/0!	#DIV/0!	#DIV/0!	#DIV/0!	#DIV/0!	0
						#DIV/0!		#DIV/0!															#DIV/0!	#DIV/0!	#DIV/0!	#DIV/0!	#DIV/0!	#DIV/0!	#DIV/0!	#DIV/0!	#DIV/0!	#DIV/0!	#DIV/0!	#DIV/0!	#DIV/0!	0	0	0	0	0	0	#DIV/0!	#DIV/0!	#DIV/0!	#DIV/0!	#DIV/0!	#DIV/0!	#DIV/0!	0
						#DIV/0!		#DIV/0!															#DIV/0!	#DIV/0!	#DIV/0!	#DIV/0!	#DIV/0!	#DIV/0!	#DIV/0!	#DIV/0!	#DIV/0!	#DIV/0!	#DIV/0!	#DIV/0!	#DIV/0!	0	0	0	0	0	0	#DIV/0!	#DIV/0!	#DIV/0!	#DIV/0!	#DIV/0!	#DIV/0!	#DIV/0!	0
						#DIV/0!		#DIV/0!															#DIV/0!	#DIV/0!	#DIV/0!	#DIV/0!	#DIV/0!	#DIV/0!	#DIV/0!	#DIV/0!	#DIV/0!	#DIV/0!	#DIV/0!	#DIV/0!	#DIV/0!	0	0	0	0	0	0	#DIV/0!	#DIV/0!	#DIV/0!	#DIV/0!	#DIV/0!	#DIV/0!	#DIV/0!	0
						#DIV/0!		#DIV/0!															#DIV/0!	#DIV/0!	#DIV/0!	#DIV/0!	#DIV/0!	#DIV/0!	#DIV/0!	#DIV/0!	#DIV/0!	#DIV/0!	#DIV/0!	#DIV/0!	#DIV/0!	0	0	0	0	0	0	#DIV/0!	#DIV/0!	#DIV/0!	#DIV/0!	#DIV/0!	#DIV/0!	#DIV/0!	0
						#DIV/0!		#DIV/0!															#DIV/0!	#DIV/0!	#DIV/0!	#DIV/0!	#DIV/0!	#DIV/0!	#DIV/0!	#DIV/0!	#DIV/0!	#DIV/0!	#DIV/0!	#DIV/0!	#DIV/0!	0	0	0	0	0	0	#DIV/0!	#DIV/0!	#DIV/0!	#DIV/0!	#DIV/0!	#DIV/0!	#DIV/0!	0
						#DIV/0!		#DIV/0!															#DIV/0!	#DIV/0!	#DIV/0!	#DIV/0!	#DIV/0!	#DIV/0!	#DIV/0!	#DIV/0!	#DIV/0!	#DIV/0!	#DIV/0!	#DIV/0!	#DIV/0!	0	0	0	0	0	0	#DIV/0!	#DIV/0!	#DIV/0!	#DIV/0!	#DIV/0!	#DIV/0!	#DIV/0!	0
						#DIV/0!		#DIV/0!															#DIV/0!	#DIV/0!	#DIV/0!	#DIV/0!	#DIV/0!	#DIV/0!	#DIV/0!	#DIV/0!	#DIV/0!	#DIV/0!	#DIV/0!	#DIV/0!	#DIV/0!	0	0	0	0	0	0	#DIV/0!	#DIV/0!	#DIV/0!	#DIV/0!	#DIV/0!	#DIV/0!	#DIV/0!	0
						#DIV/0!		#DIV/0!															#DIV/0!	#DIV/0!	#DIV/0!	#DIV/0!	#DIV/0!	#DIV/0!	#DIV/0!	#DIV/0!	#DIV/0!	#DIV/0!	#DIV/0!	#DIV/0!	#DIV/0!	0	0	0	0	0	0	#DIV/0!	#DIV/0!	#DIV/0!	#DIV/0!	#DIV/0!	#DIV/0!	#DIV/0!	0
						#DIV/0!		#DIV/0!															#DIV/0!	#DIV/0!	#DIV/0!	#DIV/0!	#DIV/0!	#DIV/0!	#DIV/0!	#DIV/0!	#DIV/0!	#DIV/0!	#DIV/0!	#DIV/0!	#DIV/0!	0	0	0	0	0	0	#DIV/0!	#DIV/0!	#DIV/0!	#DIV/0!	#DIV/0!	#DIV/0!	#DIV/0!	0
						#DIV/0!		#DIV/0!															#DIV/0!	#DIV/0!	#DIV/0!	#DIV/0!	#DIV/0!	#DIV/0!	#DIV/0!	#DIV/0!	#DIV/0!	#DIV/0!	#DIV/0!	#DIV/0!	#DIV/0!	0	0	0	0	0	0	#DIV/0!	#DIV/0!	#DIV/0!	#DIV/0!	#DIV/0!	#DIV/0!	#DIV/0!	0
						#DIV/0!		#DIV/0!															#DIV/0!	#DIV/0!	#DIV/0!	#DIV/0!	#DIV/0!	#DIV/0!	#DIV/0!	#DIV/0!	#DIV/0!	#DIV/0!	#DIV/0!	#DIV/0!	#DIV/0!	0	0	0	0	0	0	#DIV/0!	#DIV/0!	#DIV/0!	#DIV/0!	#DIV/0!	#DIV/0!	#DIV/0!	0
						#DIV/0!		#DIV/0!															#DIV/0!	#DIV/0!	#DIV/0!	#DIV/0!	#DIV/0!	#DIV/0!	#DIV/0!	#DIV/0!	#DIV/0!	#DIV/0!	#DIV/0!	#DIV/0!	#DIV/0!	0	0	0	0	0	0	#DIV/0!	#DIV/0!	#DIV/0!	#DIV/0!	#DIV/0!	#DIV/0!	#DIV/0!	0
						#DIV/0!		#DIV/0!															#DIV/0!	#DIV/0!	#DIV/0!	#DIV/0!	#DIV/0!	#DIV/0!	#DIV/0!	#DIV/0!	#DIV/0!	#DIV/0!	#DIV/0!	#DIV/0!	#DIV/0!	0	0	0	0	0	0	#DIV/0!	#DIV/0!	#DIV/0!	#DIV/0!	#DIV/0!	#DIV/0!	#DIV/0!	0
						#DIV/0!		#DIV/0!															#DIV/0!	#DIV/0!	#DIV/0!	#DIV/0!	#DIV/0!	#DIV/0!	#DIV/0!	#DIV/0!	#DIV/0!	#DIV/0!	#DIV/0!	#DIV/0!	#DIV/0!	0	0	0	0	0	0	#DIV/0!	#DIV/0!	#DIV/0!	#DIV/0!	#DIV/0!	#DIV/0!	#DIV/0!	0
						#DIV/0!		#DIV/0!															#DIV/0!	#DIV/0!	#DIV/0!	#DIV/0!	#DIV/0!	#DIV/0!	#DIV/0!	#DIV/0!	#DIV/0!	#DIV/0!	#DIV/0!	#DIV/0!	#DIV/0!	0	0	0	0	0	0	#DIV/0!	#DIV/0!	#DIV/0!	#DIV/0!	#DIV/0!	#DIV/0!	#DIV/0!	0
						#DIV/0!		#DIV/0!															#DIV/0!	#DIV/0!	#DIV/0!	#DIV/0!	#DIV/0!	#DIV/0!	#DIV/0!	#DIV/0!	#DIV/0!	#DIV/0!	#DIV/0!	#DIV/0!	#DIV/0!	0	0	0	0	0	0	#DIV/0!	#DIV/0!	#DIV/0!	#DIV/0!	#DIV/0!	#DIV/0!	#DIV/0!	0
						#DIV/0!		#DIV/0!															#DIV/0!	#DIV/0!	#DIV/0!	#DIV/0!	#DIV/0!	#DIV/0!	#DIV/0!	#DIV/0!	#DIV/0!	#DIV/0!	#DIV/0!	#DIV/0!	#DIV/0!	0	0	0	0	0	0	#DIV/0!	#DIV/0!	#DIV/0!	#DIV/0!	#DIV/0!	#DIV/0!	#DIV/0!	0
						#DIV/0!		#DIV/0!															#DIV/0!	#DIV/0!	#DIV/0!	#DIV/0!	#DIV/0!	#DIV/0!	#DIV/0!	#DIV/0!	#DIV/0!	#DIV/0!	#DIV/0!	#DIV/0!	#DIV/0!	0	0	0	0	0	0	#DIV/0!	#DIV/0!	#DIV/0!	#DIV/0!	#DIV/0!	#DIV/0!	#DIV/0!	0
						#DIV/0!		#DIV/0!															#DIV/0!	#DIV/0!	#DIV/0!	#DIV/0!	#DIV/0!	#DIV/0!	#DIV/0!	#DIV/0!	#DIV/0!	#DIV/0!	#DIV/0!	#DIV/0!	#DIV/0!	0	0	0	0	0	0	#DIV/0!	#DIV/0!	#DIV/0!	#DIV/0!	#DIV/0!	#DIV/0!	#DIV/0!	0
						#DIV/0!		#DIV/0!															#DIV/0!	#DIV/0!	#DIV/0!	#DIV/0!	#DIV/0!	#DIV/0!	#DIV/0!	#DIV/0!	#DIV/0!	#DIV/0!	#DIV/0!	#DIV/0!	#DIV/0!	0	0	0	0	0	0	#DIV/0!	#DIV/0!	#DIV/0!	#DIV/0!	#DIV/0!	#DIV/0!	#DIV/0!	0
						#DIV/0!		#DIV/0!															#DIV/0!	#DIV/0!	#DIV/0!	#DIV/0!	#DIV/0!	#DIV/0!	#DIV/0!	#DIV/0!	#DIV/0!	#DIV/0!	#DIV/0!	#DIV/0!	#DIV/0!	0	0	0	0	0	0	#DIV/0!	#DIV/0!	#DIV/0!	#DIV/0!	#DIV/0!	#DIV/0!	#DIV/0!	0
						#DIV/0!		#DIV/0!															#DIV/0!	#DIV/0!	#DIV/0!	#DIV/0!	#DIV/0!	#DIV/0!	#DIV/0!	#DIV/0!	#DIV/0!	#DIV/0!	#DIV/0!	#DIV/0!	#DIV/0!	0	0	0	0	0	0	#DIV/0!	#DIV/0!	#DIV/0!	#DIV/0!	#DIV/0!	#DIV/0!	#DIV/0!	0
						#DIV/0!		#DIV/0!															#DIV/0!	#DIV/0!	#DIV/0!	#DIV/0!	#DIV/0!	#DIV/0!	#DIV/0!	#DIV/0!	#DIV/0!	#DIV/0!	#DIV/0!	#DIV/0!	#DIV/0!	0	0	0	0	0	0	#DIV/0!	#DIV/0!	#DIV/0!	#DIV/0!	#DIV/0!	#DIV/0!	#DIV/0!	0
						#DIV/0!		#DIV/0!															#DIV/0!	#DIV/0!	#DIV/0!	#DIV/0!	#DIV/0!	#DIV/0!	#DIV/0!	#DIV/0!	#DIV/0!	#DIV/0!	#DIV/0!	#DIV/0!	#DIV/0!	0	0	0	0	0	0	#DIV/0!	#DIV/0!	#DIV/0!	#DIV/0!	#DIV/0!	#DIV/0!	#DIV/0!	0
						#DIV/0!		#DIV/0!															#DIV/0!	#DIV/0!	#DIV/0!	#DIV/0!	#DIV/0!	#DIV/0!	#DIV/0!	#DIV/0!	#DIV/0!	#DIV/0!	#DIV/0!	#DIV/0!	#DIV/0!	0	0	0	0	0	0	#DIV/0!	#DIV/0!	#DIV/0!	#DIV/0!	#DIV/0!	#DIV/0!	#DIV/0!	0
						#DIV/0!		#DIV/0!															#DIV/0!	#DIV/0!	#DIV/0!	#DIV/0!	#DIV/0!	#DIV/0!	#DIV/0!	#DIV/0!	#DIV/0!	#DIV/0!	#DIV/0!	#DIV/0!	#DIV/0!	0	0	0	0	0	0	#DIV/0!	#DIV/0!	#DIV/0!	#DIV/0!	#DIV/0!	#DIV/0!	#DIV/0!	0
						#DIV/0!		#DIV/0!															#DIV/0!	#DIV/0!	#DIV/0!	#DIV/0!	#DIV/0!	#DIV/0!	#DIV/0!	#DIV/0!	#DIV/0!	#DIV/0!	#DIV/0!	#DIV/0!	#DIV/0!	0	0	0	0	0	0	#DIV/0!	#DIV/0!	#DIV/0!	#DIV/0!	#DIV/0!	#DIV/0!	#DIV/0!	0
						#DIV/0!		#DIV/0!															#DIV/0!	#DIV/0!	#DIV/0!	#DIV/0!	#DIV/0!	#DIV/0!	#DIV/0!	#DIV/0!	#DIV/0!	#DIV/0!	#DIV/0!	#DIV/0!	#DIV/0!	0	0	0	0	0	0	#DIV/0!	#DIV/0!	#DIV/0!	#DIV/0!	#DIV/0!	#DIV/0!	#DIV/0!	0
						#DIV/0!		#DIV/0!															#DIV/0!	#DIV/0!	#DIV/0!	#DIV/0!	#DIV/0!	#DIV/0!	#DIV/0!	#DIV/0!	#DIV/0!	#DIV/0!	#DIV/0!	#DIV/0!	#DIV/0!	0	0	0	0	0	0	#DIV/0!	#DIV/0!	#DIV/0!	#DIV/0!	#DIV/0!	#DIV/0!	#DIV/0!	0
						#DIV/0!		#DIV/0!															#DIV/0!	#DIV/0!	#DIV/0!	#DIV/0!	#DIV/0!	#DIV/0!	#DIV/0!	#DIV/0!	#DIV/0!	#DIV/0!	#DIV/0!	#DIV/0!	#DIV/0!	0	0	0	0	0	0	#DIV/0!	#DIV/0!	#DIV/0!	#DIV/0!	#DIV/0!	#DIV/0!	#DIV/0!	0
						#DIV/0!		#DIV/0!															#DIV/0!	#DIV/0!	#DIV/0!	#DIV/0!	#DIV/0!	#DIV/0!	#DIV/0!	#DIV/0!	#DIV/0!	#DIV/0!	#DIV/0!	#DIV/0!	#DIV/0!	0	0	0	0	0	0	#DIV/0!	#DIV/0!	#DIV/0!	#DIV/0!	#DIV/0!	#DIV/0!	#DIV/0!	0
						#DIV/0!		#DIV/0!															#DIV/0!	#DIV/0!	#DIV/0!	#DIV/0!	#DIV/0!	#DIV/0!	#DIV/0!	#DIV/0!	#DIV/0!	#DIV/0!	#DIV/0!	#DIV/0!	#DIV/0!	0	0	0	0	0	0	#DIV/0!	#DIV/0!	#DIV/0!	#DIV/0!	#DIV/0!	#DIV/0!	#DIV/0!	0
						#DIV/0!		#DIV/0!															#DIV/0!	#DIV/0!	#DIV/0!	#DIV/0!	#DIV/0!	#DIV/0!	#DIV/0!	#DIV/0!	#DIV/0!	#DIV/0!	#DIV/0!	#DIV/0!	#DIV/0!	0	0	0	0	0	0	#DIV/0!	#DIV/0!	#DIV/0!	#DIV/0!	#DIV/0!	#DIV/0!	#DIV/0!	0
						#DIV/0!		#DIV/0!															#DIV/0!	#DIV/0!	#DIV/0!	#DIV/0!	#DIV/0!	#DIV/0!	#DIV/0!	#DIV/0!	#DIV/0!	#DIV/0!	#DIV/0!	#DIV/0!	#DIV/0!	0	0	0	0	0	0	#DIV/0!	#DIV/0!	#DIV/0!	#DIV/0!	#DIV/0!	#DIV/0!	#DIV/0!	0
						#DIV/0!		#DIV/0!															#DIV/0!	#DIV/0!	#DIV/0!	#DIV/0!	#DIV/0!	#DIV/0!	#DIV/0!	#DIV/0!	#DIV/0!	#DIV/0!	#DIV/0!	#DIV/0!	#DIV/0!	0	0	0	0	0	0	#DIV/0!	#DIV/0!	#DIV/0!	#DIV/0!	#DIV/0!	#DIV/0!	#DIV/0!	0
						#DIV/0!		#DIV/0!															#DIV/0!	#DIV/0!	#DIV/0!	#DIV/0!	#DIV/0!	#DIV/0!	#DIV/0!	#DIV/0!	#DIV/0!	#DIV/0!	#DIV/0!	#DIV/0!	#DIV/0!	0	0	0	0	0	0	#DIV/0!	#DIV/0!	#DIV/0!	#DIV/0!	#DIV/0!	#DIV/0!	#DIV/0!	0
						#DIV/0!		#DIV/0!															#DIV/0!	#DIV/0!	#DIV/0!	#DIV/0!	#DIV/0!	#DIV/0!	#DIV/0!	#DIV/0!	#DIV/0!	#DIV/0!	#DIV/0!	#DIV/0!	#DIV/0!	0	0	0	0	0	0	#DIV/0!	#DIV/0!	#DIV/0!	#DIV/0!	#DIV/0!	#DIV/0!	#DIV/0!	0
						#DIV/0!		#DIV/0!															#DIV/0!	#DIV/0!	#DIV/0!	#DIV/0!	#DIV/0!	#DIV/0!	#DIV/0!	#DIV/0!	#DIV/0!	#DIV/0!	#DIV/0!	#DIV/0!	#DIV/0!	0	0	0	0	0	0	#DIV/0!	#DIV/0!	#DIV/0!	#DIV/0!	#DIV/0!	#DIV/0!	#DIV/0!	0
						#DIV/0!		#DIV/0!															#DIV/0!	#DIV/0!	#DIV/0!	#DIV/0!	#DIV/0!	#DIV/0!	#DIV/0!	#DIV/0!	#DIV/0!	#DIV/0!	#DIV/0!	#DIV/0!	#DIV/0!	0	0	0	0	0	0	#DIV/0!	#DIV/0!	#DIV/0!	#DIV/0!	#DIV/0!	#DIV/0!	#DIV/0!	0
						#DIV/0!		#DIV/0!															#DIV/0!	#DIV/0!	#DIV/0!	#DIV/0!	#DIV/0!	#DIV/0!	#DIV/0!	#DIV/0!	#DIV/0!	#DIV/0!	#DIV/0!	#DIV/0!	#DIV/0!	0	0	0	0	0	0	#DIV/0!	#DIV/0!	#DIV/0!	#DIV/0!	#DIV/0!	#DIV/0!	#DIV/0!	0
						#DIV/0!		#DIV/0!															#DIV/0!	#DIV/0!	#DIV/0!	#DIV/0!	#DIV/0!	#DIV/0!	#DIV/0!	#DIV/0!	#DIV/0!	#DIV/0!	#DIV/0!	#DIV/0!	#DIV/0!	0	0	0	0	0	0	#DIV/0!	#DIV/0!	#DIV/0!	#DIV/0!	#DIV/0!	#DIV/0!	#DIV/0!	0
						#DIV/0!		#DIV/0!															#DIV/0!	#DIV/0!	#DIV/0!	#DIV/0!	#DIV/0!	#DIV/0!	#DIV/0!	#DIV/0!	#DIV/0!	#DIV/0!	#DIV/0!	#DIV/0!	#DIV/0!	0	0	0	0	0	0	#DIV/0!	#DIV/0!	#DIV/0!	#DIV/0!	#DIV/0!	#DIV/0!	#DIV/0!	0
						#DIV/0!		#DIV/0!															#DIV/0!	#DIV/0!	#DIV/0!	#DIV/0!	#DIV/0!	#DIV/0!	#DIV/0!	#DIV/0!	#DIV/0!	#DIV/0!	#DIV/0!	#DIV/0!	#DIV/0!	0	0	0	0	0	0	#DIV/0!	#DIV/0!	#DIV/0!	#DIV/0!	#DIV/0!	#DIV/0!	#DIV/0!	0
						#DIV/0!		#DIV/0!															#DIV/0!	#DIV/0!	#DIV/0!	#DIV/0!	#DIV/0!	#DIV/0!	#DIV/0!	#DIV/0!	#DIV/0!	#DIV/0!	#DIV/0!	#DIV/0!	#DIV/0!	0	0	0	0	0	0	#DIV/0!	#DIV/0!	#DIV/0!	#DIV/0!	#DIV/0!	#DIV/0!	#DIV/0!	0
						#DIV/0!		#DIV/0!															#DIV/0!	#DIV/0!	#DIV/0!	#DIV/0!	#DIV/0!	#DIV/0!	#DIV/0!	#DIV/0!	#DIV/0!	#DIV/0!	#DIV/0!	#DIV/0!	#DIV/0!	0	0	0	0	0	0	#DIV/0!	#DIV/0!	#DIV/0!	#DIV/0!	#DIV/0!	#DIV/0!	#DIV/0!	0
						#DIV/0!		#DIV/0!															#DIV/0!	#DIV/0!	#DIV/0!	#DIV/0!	#DIV/0!	#DIV/0!	#DIV/0!	#DIV/0!	#DIV/0!	#DIV/0!	#DIV/0!	#DIV/0!	#DIV/0!	0	0	0	0	0	0	#DIV/0!	#DIV/0!	#DIV/0!	#DIV/0!	#DIV/0!	#DIV/0!	#DIV/0!	0
						#DIV/0!		#DIV/0!															#DIV/0!	#DIV/0!	#DIV/0!	#DIV/0!	#DIV/0!	#DIV/0!	#DIV/0!	#DIV/0!	#DIV/0!	#DIV/0!	#DIV/0!	#DIV/0!	#DIV/0!	0	0	0	0	0	0	#DIV/0!	#DIV/0!	#DIV/0!	#DIV/0!	#DIV/0!	#DIV/0!	#DIV/0!	0
						#DIV/0!		#DIV/0!															#DIV/0!	#DIV/0!	#DIV/0!	#DIV/0!	#DIV/0!	#DIV/0!	#DIV/0!	#DIV/0!	#DIV/0!	#DIV/0!	#DIV/0!	#DIV/0!	#DIV/0!	0	0	0	0	0	0	#DIV/0!	#DIV/0!	#DIV/0!	#DIV/0!	#DIV/0!	#DIV/0!	#DIV/0!	0
						#DIV/0!		#DIV/0!															#DIV/0!	#DIV/0!	#DIV/0!	#DIV/0!	#DIV/0!	#DIV/0!	#DIV/0!	#DIV/0!	#DIV/0!	#DIV/0!	#DIV/0!	#DIV/0!	#DIV/0!	0	0	0	0	0	0	#DIV/0!	#DIV/0!	#DIV/0!	#DIV/0!	#DIV/0!	#DIV/0!	#DIV/0!	0
						#DIV/0!		#DIV/0!															#DIV/0!	#DIV/0!	#DIV/0!	#DIV/0!	#DIV/0!	#DIV/0!	#DIV/0!	#DIV/0!	#DIV/0!	#DIV/0!	#DIV/0!	#DIV/0!	#DIV/0!	0	0	0	0	0	0	#DIV/0!	#DIV/0!	#DIV/0!	#DIV/0!	#DIV/0!	#DIV/0!	#DIV/0!	0
						#DIV/0!		#DIV/0!															#DIV/0!	#DIV/0!	#DIV/0!	#DIV/0!	#DIV/0!	#DIV/0!	#DIV/0!	#DIV/0!	#DIV/0!	#DIV/0!	#DIV/0!	#DIV/0!	#DIV/0!	0	0	0	0	0	0	#DIV/0!	#DIV/0!	#DIV/0!	#DIV/0!	#DIV/0!	#DIV/0!	#DIV/0!	0
						#DIV/0!		#DIV/0!															#DIV/0!	#DIV/0!	#DIV/0!	#DIV/0!	#DIV/0!	#DIV/0!	#DIV/0!	#DIV/0!	#DIV/0!	#DIV/0!	#DIV/0!	#DIV/0!	#DIV/0!	0	0	0	0	0	0	#DIV/0!	#DIV/0!	#DIV/0!	#DIV/0!	#DIV/0!	#DIV/0!	#DIV/0!	0
						#DIV/0!		#DIV/0!															#DIV/0!	#DIV/0!	#DIV/0!	#DIV/0!	#DIV/0!	#DIV/0!	#DIV/0!	#DIV/0!	#DIV/0!	#DIV/0!	#DIV/0!	#DIV/0!	#DIV/0!	0	0	0	0	0	0	#DIV/0!	#DIV/0!	#DIV/0!	#DIV/0!	#DIV/0!	#DIV/0!	#DIV/0!	0
						#DIV/0!		#DIV/0!															#DIV/0!	#DIV/0!	#DIV/0!	#DIV/0!	#DIV/0!	#DIV/0!	#DIV/0!	#DIV/0!	#DIV/0!	#DIV/0!	#DIV/0!	#DIV/0!	#DIV/0!	0	0	0	0	0	0	#DIV/0!	#DIV/0!	#DIV/0!	#DIV/0!	#DIV/0!	#DIV/0!	#DIV/0!	0
						#DIV/0!		#DIV/0!															#DIV/0!	#DIV/0!	#DIV/0!	#DIV/0!	#DIV/0!	#DIV/0!	#DIV/0!	#DIV/0!	#DIV/0!	#DIV/0!	#DIV/0!	#DIV/0!	#DIV/0!	0	0	0	0	0	0	#DIV/0!	#DIV/0!	#DIV/0!	#DIV/0!	#DIV/0!	#DIV/0!	#DIV/0!	0
						#DIV/0!		#DIV/0!															#DIV/0!	#DIV/0!	#DIV/0!	#DIV/0!	#DIV/0!	#DIV/0!	#DIV/0!	#DIV/0!	#DIV/0!	#DIV/0!	#DIV/0!	#DIV/0!	#DIV/0!	0	0	0	0	0	0	#DIV/0!	#DIV/0!	#DIV/0!	#DIV/0!	#DIV/0!	#DIV/0!	#DIV/0!	0
						#DIV/0!		#DIV/0!															#DIV/0!	#DIV/0!	#DIV/0!	#DIV/0!	#DIV/0!	#DIV/0!	#DIV/0!	#DIV/0!	#DIV/0!	#DIV/0!	#DIV/0!	#DIV/0!	#DIV/0!	0	0	0	0	0	0	#DIV/0!	#DIV/0!	#DIV/0!	#DIV/0!	#DIV/0!	#DIV/0!	#DIV/0!	0
						#DIV/0!		#DIV/0!															#DIV/0!	#DIV/0!	#DIV/0!	#DIV/0!	#DIV/0!	#DIV/0!	#DIV/0!	#DIV/0!	#DIV/0!	#DIV/0!	#DIV/0!	#DIV/0!	#DIV/0!	0	0	0	0	0	0	#DIV/0!	#DIV/0!	#DIV/0!	#DIV/0!	#DIV/0!	#DIV/0!	#DIV/0!	0
						#DIV/0!		#DIV/0!															#DIV/0!	#DIV/0!	#DIV/0!	#DIV/0!	#DIV/0!	#DIV/0!	#DIV/0!	#DIV/0!	#DIV/0!	#DIV/0!	#DIV/0!	#DIV/0!	#DIV/0!	0	0	0	0	0	0	#DIV/0!	#DIV/0!	#DIV/0!	#DIV/0!	#DIV/0!	#DIV/0!	#DIV/0!	0
						#DIV/0!		#DIV/0!															#DIV/0!	#DIV/0!	#DIV/0!	#DIV/0!	#DIV/0!	#DIV/0!	#DIV/0!	#DIV/0!	#DIV/0!	#DIV/0!	#DIV/0!	#DIV/0!	#DIV/0!	0	0	0	0	0	0	#DIV/0!	#DIV/0!	#DIV/0!	#DIV/0!	#DIV/0!	#DIV/0!	#DIV/0!	0
						#DIV/0!		#DIV/0!															#DIV/0!	#DIV/0!	#DIV/0!	#DIV/0!	#DIV/0!	#DIV/0!	#DIV/0!	#DIV/0!	#DIV/0!	#DIV/0!	#DIV/0!	#DIV/0!	#DIV/0!	0	0	0	0	0	0	#DIV/0!	#DIV/0!	#DIV/0!	#DIV/0!	#DIV/0!	#DIV/0!	#DIV/0!	0
						#DIV/0!		#DIV/0!															#DIV/0!	#DIV/0!	#DIV/0!	#DIV/0!	#DIV/0!	#DIV/0!	#DIV/0!	#DIV/0!	#DIV/0!	#DIV/0!	#DIV/0!	#DIV/0!	#DIV/0!	0	0	0	0	0	0	#DIV/0!	#DIV/0!	#DIV/0!	#DIV/0!	#DIV/0!	#DIV/0!	#DIV/0!	0
						#DIV/0!		#DIV/0!															#DIV/0!	#DIV/0!	#DIV/0!	#DIV/0!	#DIV/0!	#DIV/0!	#DIV/0!	#DIV/0!	#DIV/0!	#DIV/0!	#DIV/0!	#DIV/0!	#DIV/0!	0	0	0	0	0	0	#DIV/0!	#DIV/0!	#DIV/0!	#DIV/0!	#DIV/0!	#DIV/0!	#DIV/0!	0
						#DIV/0!		#DIV/0!															#DIV/0!	#DIV/0!	#DIV/0!	#DIV/0!	#DIV/0!	#DIV/0!	#DIV/0!	#DIV/0!	#DIV/0!	#DIV/0!	#DIV/0!	#DIV/0!	#DIV/0!	0	0	0	0	0	0	#DIV/0!	#DIV/0!	#DIV/0!	#DIV/0!	#DIV/0!	#DIV/0!	#DIV/0!	0
						#DIV/0!		#DIV/0!															#DIV/0!	#DIV/0!	#DIV/0!	#DIV/0!	#DIV/0!	#DIV/0!	#DIV/0!	#DIV/0!	#DIV/0!	#DIV/0!	#DIV/0!	#DIV/0!	#DIV/0!	0	0	0	0	0	0	#DIV/0!	#DIV/0!	#DIV/0!	#DIV/0!	#DIV/0!	#DIV/0!	#DIV/0!	0
						#DIV/0!		#DIV/0!															#DIV/0!	#DIV/0!	#DIV/0!	#DIV/0!	#DIV/0!	#DIV/0!	#DIV/0!	#DIV/0!	#DIV/0!	#DIV/0!	#DIV/0!	#DIV/0!	#DIV/0!	0	0	0	0	0	0	#DIV/0!	#DIV/0!	#DIV/0!	#DIV/0!	#DIV/0!	#DIV/0!	#DIV/0!	0
						#DIV/0!		#DIV/0!															#DIV/0!	#DIV/0!	#DIV/0!	#DIV/0!	#DIV/0!	#DIV/0!	#DIV/0!	#DIV/0!	#DIV/0!	#DIV/0!	#DIV/0!	#DIV/0!	#DIV/0!	0	0	0	0	0	0	#DIV/0!	#DIV/0!	#DIV/0!	#DIV/0!	#DIV/0!	#DIV/0!	#DIV/0!	0
						#DIV/0!		#DIV/0!															#DIV/0!	#DIV/0!	#DIV/0!	#DIV/0!	#DIV/0!	#DIV/0!	#DIV/0!	#DIV/0!	#DIV/0!	#DIV/0!	#DIV/0!	#DIV/0!	#DIV/0!	0	0	0	0	0	0	#DIV/0!	#DIV/0!	#DIV/0!	#DIV/0!	#DIV/0!	#DIV/0!	#DIV/0!	0
						#DIV/0!		#DIV/0!															#DIV/0!	#DIV/0!	#DIV/0!	#DIV/0!	#DIV/0!	#DIV/0!	#DIV/0!	#DIV/0!	#DIV/0!	#DIV/0!	#DIV/0!	#DIV/0!	#DIV/0!	0	0	0	0	0	0	#DIV/0!	#DIV/0!	#DIV/0!	#DIV/0!	#DIV/0!	#DIV/0!	#DIV/0!	0
						#DIV/0!		#DIV/0!															#DIV/0!	#DIV/0!	#DIV/0!	#DIV/0!	#DIV/0!	#DIV/0!	#DIV/0!	#DIV/0!	#DIV/0!	#DIV/0!	#DIV/0!	#DIV/0!	#DIV/0!	0	0	0	0	0	0	#DIV/0!	#DIV/0!	#DIV/0!	#DIV/0!	#DIV/0!	#DIV/0!	#DIV/0!	0
						#DIV/0!		#DIV/0!															#DIV/0!	#DIV/0!	#DIV/0!	#DIV/0!	#DIV/0!	#DIV/0!	#DIV/0!	#DIV/0!	#DIV/0!	#DIV/0!	#DIV/0!	#DIV/0!	#DIV/0!	0	0	0	0	0	0	#DIV/0!	#DIV/0!	#DIV/0!	#DIV/0!	#DIV/0!	#DIV/0!	#DIV/0!	0
						#DIV/0!		#DIV/0!															#DIV/0!	#DIV/0!	#DIV/0!	#DIV/0!	#DIV/0!	#DIV/0!	#DIV/0!	#DIV/0!	#DIV/0!	#DIV/0!	#DIV/0!	#DIV/0!	#DIV/0!	0	0	0	0	0	0	#DIV/0!	#DIV/0!	#DIV/0!	#DIV/0!	#DIV/0!	#DIV/0!	#DIV/0!	0
						#DIV/0!		#DIV/0!															#DIV/0!	#DIV/0!	#DIV/0!	#DIV/0!	#DIV/0!	#DIV/0!	#DIV/0!	#DIV/0!	#DIV/0!	#DIV/0!	#DIV/0!	#DIV/0!	#DIV/0!	0	0	0	0	0	0	#DIV/0!	#DIV/0!	#DIV/0!	#DIV/0!	#DIV/0!	#DIV/0!	#DIV/0!	0
						#DIV/0!		#DIV/0!															#DIV/0!	#DIV/0!	#DIV/0!	#DIV/0!	#DIV/0!	#DIV/0!	#DIV/0!	#DIV/0!	#DIV/0!	#DIV/0!	#DIV/0!	#DIV/0!	#DIV/0!	0	0	0	0	0	0	#DIV/0!	#DIV/0!	#DIV/0!	#DIV/0!	#DIV/0!	#DIV/0!	#DIV/0!	0
						#DIV/0!		#DIV/0!															#DIV/0!	#DIV/0!	#DIV/0!	#DIV/0!	#DIV/0!	#DIV/0!	#DIV/0!	#DIV/0!	#DIV/0!	#DIV/0!	#DIV/0!	#DIV/0!	#DIV/0!	0	0	0	0	0	0	#DIV/0!	#DIV/0!	#DIV/0!	#DIV/0!	#DIV/0!	#DIV/0!	#DIV/0!	0
						#DIV/0!		#DIV/0!															#DIV/0!	#DIV/0!	#DIV/0!	#DIV/0!	#DIV/0!	#DIV/0!	#DIV/0!	#DIV/0!	#DIV/0!	#DIV/0!	#DIV/0!	#DIV/0!	#DIV/0!	0	0	0	0	0	0	#DIV/0!	#DIV/0!	#DIV/0!	#DIV/0!	#DIV/0!	#DIV/0!	#DIV/0!	0
						#DIV/0!		#DIV/0!															#DIV/0!	#DIV/0!	#DIV/0!	#DIV/0!	#DIV/0!	#DIV/0!	#DIV/0!	#DIV/0!	#DIV/0!	#DIV/0!	#DIV/0!	#DIV/0!	#DIV/0!	0	0	0	0	0	0	#DIV/0!	#DIV/0!	#DIV/0!	#DIV/0!	#DIV/0!	#DIV/0!	#DIV/0!	0
						#DIV/0!		#DIV/0!															#DIV/0!	#DIV/0!	#DIV/0!	#DIV/0!	#DIV/0!	#DIV/0!	#DIV/0!	#DIV/0!	#DIV/0!	#DIV/0!	#DIV/0!	#DIV/0!	#DIV/0!	0	0	0	0	0	0	#DIV/0!	#DIV/0!	#DIV/0!	#DIV/0!	#DIV/0!	#DIV/0!	#DIV/0!	0
						#DIV/0!		#DIV/0!															#DIV/0!	#DIV/0!	#DIV/0!	#DIV/0!	#DIV/0!	#DIV/0!	#DIV/0!	#DIV/0!	#DIV/0!	#DIV/0!	#DIV/0!	#DIV/0!	#DIV/0!	0	0	0	0	0	0	#DIV/0!	#DIV/0!	#DIV/0!	#DIV/0!	#DIV/0!	#DIV/0!	#DIV/0!	0
						#DIV/0!		#DIV/0!															#DIV/0!	#DIV/0!	#DIV/0!	#DIV/0!	#DIV/0!	#DIV/0!	#DIV/0!	#DIV/0!	#DIV/0!	#DIV/0!	#DIV/0!	#DIV/0!	#DIV/0!	0	0	0	0	0	0	#DIV/0!	#DIV/0!	#DIV/0!	#DIV/0!	#DIV/0!	#DIV/0!	#DIV/0!	0
						#DIV/0!		#DIV/0!															#DIV/0!	#DIV/0!	#DIV/0!	#DIV/0!	#DIV/0!	#DIV/0!	#DIV/0!	#DIV/0!	#DIV/0!	#DIV/0!	#DIV/0!	#DIV/0!	#DIV/0!	0	0	0	0	0	0	#DIV/0!	#DIV/0!	#DIV/0!	#DIV/0!	#DIV/0!	#DIV/0!	#DIV/0!	0
						#DIV/0!		#DIV/0!															#DIV/0!	#DIV/0!	#DIV/0!	#DIV/0!	#DIV/0!	#DIV/0!	#DIV/0!	#DIV/0!	#DIV/0!	#DIV/0!	#DIV/0!	#DIV/0!	#DIV/0!	0	0	0	0	0	0	#DIV/0!	#DIV/0!	#DIV/0!	#DIV/0!	#DIV/0!	#DIV/0!	#DIV/0!	0
						#DIV/0!		#DIV/0!															#DIV/0!	#DIV/0!	#DIV/0!	#DIV/0!	#DIV/0!	#DIV/0!	#DIV/0!	#DIV/0!	#DIV/0!	#DIV/0!	#DIV/0!	#DIV/0!	#DIV/0!	0	0	0	0	0	0	#DIV/0!	#DIV/0!	#DIV/0!	#DIV/0!	#DIV/0!	#DIV/0!	#DIV/0!	0
						#DIV/0!		#DIV/0!															#DIV/0!	#DIV/0!	#DIV/0!	#DIV/0!	#DIV/0!	#DIV/0!	#DIV/0!	#DIV/0!	#DIV/0!	#DIV/0!	#DIV/0!	#DIV/0!	#DIV/0!	0	0	0	0	0	0	#DIV/0!	#DIV/0!	#DIV/0!	#DIV/0!	#DIV/0!	#DIV/0!	#DIV/0!	0
						#DIV/0!		#DIV/0!															#DIV/0!	#DIV/0!	#DIV/0!	#DIV/0!	#DIV/0!	#DIV/0!	#DIV/0!	#DIV/0!	#DIV/0!	#DIV/0!	#DIV/0!	#DIV/0!	#DIV/0!	0	0	0	0	0	0	#DIV/0!	#DIV/0!	#DIV/0!	#DIV/0!	#DIV/0!	#DIV/0!	#DIV/0!	0
						#DIV/0!		#DIV/0!															#DIV/0!	#DIV/0!	#DIV/0!	#DIV/0!	#DIV/0!	#DIV/0!	#DIV/0!	#DIV/0!	#DIV/0!	#DIV/0!	#DIV/0!	#DIV/0!	#DIV/0!	0	0	0	0	0	0	#DIV/0!	#DIV/0!	#DIV/0!	#DIV/0!	#DIV/0!	#DIV/0!	#DIV/0!	0
						#DIV/0!		#DIV/0!															#DIV/0!	#DIV/0!	#DIV/0!	#DIV/0!	#DIV/0!	#DIV/0!	#DIV/0!	#DIV/0!	#DIV/0!	#DIV/0!	#DIV/0!	#DIV/0!	#DIV/0!	0	0	0	0	0	0	#DIV/0!	#DIV/0!	#DIV/0!	#DIV/0!	#DIV/0!	#DIV/0!	#DIV/0!	0
						#DIV/0!		#DIV/0!															#DIV/0!	#DIV/0!	#DIV/0!	#DIV/0!	#DIV/0!	#DIV/0!	#DIV/0!	#DIV/0!	#DIV/0!	#DIV/0!	#DIV/0!	#DIV/0!	#DIV/0!	0	0	0	0	0	0	#DIV/0!	#DIV/0!	#DIV/0!	#DIV/0!	#DIV/0!	#DIV/0!	#DIV/0!	0
						#DIV/0!		#DIV/0!															#DIV/0!	#DIV/0!	#DIV/0!	#DIV/0!	#DIV/0!	#DIV/0!	#DIV/0!	#DIV/0!	#DIV/0!	#DIV/0!	#DIV/0!	#DIV/0!	#DIV/0!	0	0	0	0	0	0	#DIV/0!	#DIV/0!	#DIV/0!	#DIV/0!	#DIV/0!	#DIV/0!	#DIV/0!	0
						#DIV/0!		#DIV/0!															#DIV/0!	#DIV/0!	#DIV/0!	#DIV/0!	#DIV/0!	#DIV/0!	#DIV/0!	#DIV/0!	#DIV/0!	#DIV/0!	#DIV/0!	#DIV/0!	#DIV/0!	0	0	0	0	0	0	#DIV/0!	#DIV/0!	#DIV/0!	#DIV/0!	#DIV/0!	#DIV/0!	#DIV/0!	0
						#DIV/0!		#DIV/0!															#DIV/0!	#DIV/0!	#DIV/0!	#DIV/0!	#DIV/0!	#DIV/0!	#DIV/0!	#DIV/0!	#DIV/0!	#DIV/0!	#DIV/0!	#DIV/0!	#DIV/0!	0	0	0	0	0	0	#DIV/0!	#DIV/0!	#DIV/0!	#DIV/0!	#DIV/0!	#DIV/0!	#DIV/0!	0
						#DIV/0!		#DIV/0!															#DIV/0!	#DIV/0!	#DIV/0!	#DIV/0!	#DIV/0!	#DIV/0!	#DIV/0!	#DIV/0!	#DIV/0!	#DIV/0!	#DIV/0!	#DIV/0!	#DIV/0!	0	0	0	0	0	0	#DIV/0!	#DIV/0!	#DIV/0!	#DIV/0!	#DIV/0!	#DIV/0!	#DIV/0!	0
						#DIV/0!		#DIV/0!															#DIV/0!	#DIV/0!	#DIV/0!	#DIV/0!	#DIV/0!	#DIV/0!	#DIV/0!	#DIV/0!	#DIV/0!	#DIV/0!	#DIV/0!	#DIV/0!	#DIV/0!	0	0	0	0	0	0	#DIV/0!	#DIV/0!	#DIV/0!	#DIV/0!	#DIV/0!	#DIV/0!	#DIV/0!	0
						#DIV/0!		#DIV/0!															#DIV/0!	#DIV/0!	#DIV/0!	#DIV/0!	#DIV/0!	#DIV/0!	#DIV/0!	#DIV/0!	#DIV/0!	#DIV/0!	#DIV/0!	#DIV/0!	#DIV/0!	0	0	0	0	0	0	#DIV/0!	#DIV/0!	#DIV/0!	#DIV/0!	#DIV/0!	#DIV/0!	#DIV/0!	0
						#DIV/0!		#DIV/0!															#DIV/0!	#DIV/0!	#DIV/0!	#DIV/0!	#DIV/0!	#DIV/0!	#DIV/0!	#DIV/0!	#DIV/0!	#DIV/0!	#DIV/0!	#DIV/0!	#DIV/0!	0	0	0	0	0	0	#DIV/0!	#DIV/0!	#DIV/0!	#DIV/0!	#DIV/0!	#DIV/0!	#DIV/0!	0
						#DIV/0!		#DIV/0!															#DIV/0!	#DIV/0!	#DIV/0!	#DIV/0!	#DIV/0!	#DIV/0!	#DIV/0!	#DIV/0!	#DIV/0!	#DIV/0!	#DIV/0!	#DIV/0!	#DIV/0!	0	0	0	0	0	0	#DIV/0!	#DIV/0!	#DIV/0!	#DIV/0!	#DIV/0!	#DIV/0!	#DIV/0!	0
						#DIV/0!		#DIV/0!															#DIV/0!	#DIV/0!	#DIV/0!	#DIV/0!	#DIV/0!	#DIV/0!	#DIV/0!	#DIV/0!	#DIV/0!	#DIV/0!	#DIV/0!	#DIV/0!	#DIV/0!	0	0	0	0	0	0	#DIV/0!	#DIV/0!	#DIV/0!	#DIV/0!	#DIV/0!	#DIV/0!	#DIV/0!	0
						#DIV/0!		#DIV/0!															#DIV/0!	#DIV/0!	#DIV/0!	#DIV/0!	#DIV/0!	#DIV/0!	#DIV/0!	#DIV/0!	#DIV/0!	#DIV/0!	#DIV/0!	#DIV/0!	#DIV/0!	0	0	0	0	0	0	#DIV/0!	#DIV/0!	#DIV/0!	#DIV/0!	#DIV/0!	#DIV/0!	#DIV/0!	0
						#DIV/0!		#DIV/0!															#DIV/0!	#DIV/0!	#DIV/0!	#DIV/0!	#DIV/0!	#DIV/0!	#DIV/0!	#DIV/0!	#DIV/0!	#DIV/0!	#DIV/0!	#DIV/0!	#DIV/0!	0	0	0	0	0	0	#DIV/0!	#DIV/0!	#DIV/0!	#DIV/0!	#DIV/0!	#DIV/0!	#DIV/0!	0
						#DIV/0!		#DIV/0!															#DIV/0!	#DIV/0!	#DIV/0!	#DIV/0!	#DIV/0!	#DIV/0!	#DIV/0!	#DIV/0!	#DIV/0!	#DIV/0!	#DIV/0!	#DIV/0!	#DIV/0!	0	0	0	0	0	0	#DIV/0!	#DIV/0!	#DIV/0!	#DIV/0!	#DIV/0!	#DIV/0!	#DIV/0!	0
						#DIV/0!		#DIV/0!															#DIV/0!	#DIV/0!	#DIV/0!	#DIV/0!	#DIV/0!	#DIV/0!	#DIV/0!	#DIV/0!	#DIV/0!	#DIV/0!	#DIV/0!	#DIV/0!	#DIV/0!	0	0	0	0	0	0	#DIV/0!	#DIV/0!	#DIV/0!	#DIV/0!	#DIV/0!	#DIV/0!	#DIV/0!	0
						#DIV/0!		#DIV/0!															#DIV/0!	#DIV/0!	#DIV/0!	#DIV/0!	#DIV/0!	#DIV/0!	#DIV/0!	#DIV/0!	#DIV/0!	#DIV/0!	#DIV/0!	#DIV/0!	#DIV/0!	0	0	0	0	0	0	#DIV/0!	#DIV/0!	#DIV/0!	#DIV/0!	#DIV/0!	#DIV/0!	#DIV/0!	0
						#DIV/0!		#DIV/0!															#DIV/0!	#DIV/0!	#DIV/0!	#DIV/0!	#DIV/0!	#DIV/0!	#DIV/0!	#DIV/0!	#DIV/0!	#DIV/0!	#DIV/0!	#DIV/0!	#DIV/0!	0	0	0	0	0	0	#DIV/0!	#DIV/0!	#DIV/0!	#DIV/0!	#DIV/0!	#DIV/0!	#DIV/0!	0
						#DIV/0!		#DIV/0!															#DIV/0!	#DIV/0!	#DIV/0!	#DIV/0!	#DIV/0!	#DIV/0!	#DIV/0!	#DIV/0!	#DIV/0!	#DIV/0!	#DIV/0!	#DIV/0!	#DIV/0!	0	0	0	0	0	0	#DIV/0!	#DIV/0!	#DIV/0!	#DIV/0!	#DIV/0!	#DIV/0!	#DIV/0!	0
						#DIV/0!		#DIV/0!															#DIV/0!	#DIV/0!	#DIV/0!	#DIV/0!	#DIV/0!	#DIV/0!	#DIV/0!	#DIV/0!	#DIV/0!	#DIV/0!	#DIV/0!	#DIV/0!	#DIV/0!	0	0	0	0	0	0	#DIV/0!	#DIV/0!	#DIV/0!	#DIV/0!	#DIV/0!	#DIV/0!	#DIV/0!	0
						#DIV/0!		#DIV/0!															#DIV/0!	#DIV/0!	#DIV/0!	#DIV/0!	#DIV/0!	#DIV/0!	#DIV/0!	#DIV/0!	#DIV/0!	#DIV/0!	#DIV/0!	#DIV/0!	#DIV/0!	0	0	0	0	0	0	#DIV/0!	#DIV/0!	#DIV/0!	#DIV/0!	#DIV/0!	#DIV/0!	#DIV/0!	0
						#DIV/0!		#DIV/0!															#DIV/0!	#DIV/0!	#DIV/0!	#DIV/0!	#DIV/0!	#DIV/0!	#DIV/0!	#DIV/0!	#DIV/0!	#DIV/0!	#DIV/0!	#DIV/0!	#DIV/0!	0	0	0	0	0	0	#DIV/0!	#DIV/0!	#DIV/0!	#DIV/0!	#DIV/0!	#DIV/0!	#DIV/0!	0
						#DIV/0!		#DIV/0!															#DIV/0!	#DIV/0!	#DIV/0!	#DIV/0!	#DIV/0!	#DIV/0!	#DIV/0!	#DIV/0!	#DIV/0!	#DIV/0!	#DIV/0!	#DIV/0!	#DIV/0!	0	0	0	0	0	0	#DIV/0!	#DIV/0!	#DIV/0!	#DIV/0!	#DIV/0!	#DIV/0!	#DIV/0!	0
						#DIV/0!		#DIV/0!															#DIV/0!	#DIV/0!	#DIV/0!	#DIV/0!	#DIV/0!	#DIV/0!	#DIV/0!	#DIV/0!	#DIV/0!	#DIV/0!	#DIV/0!	#DIV/0!	#DIV/0!	0	0	0	0	0	0	#DIV/0!	#DIV/0!	#DIV/0!	#DIV/0!	#DIV/0!	#DIV/0!	#DIV/0!	0
						#DIV/0!		#DIV/0!															#DIV/0!	#DIV/0!	#DIV/0!	#DIV/0!	#DIV/0!	#DIV/0!	#DIV/0!	#DIV/0!	#DIV/0!	#DIV/0!	#DIV/0!	#DIV/0!	#DIV/0!	0	0	0	0	0	0	#DIV/0!	#DIV/0!	#DIV/0!	#DIV/0!	#DIV/0!	#DIV/0!	#DIV/0!	0
						#DIV/0!		#DIV/0!															#DIV/0!	#DIV/0!	#DIV/0!	#DIV/0!	#DIV/0!	#DIV/0!	#DIV/0!	#DIV/0!	#DIV/0!	#DIV/0!	#DIV/0!	#DIV/0!	#DIV/0!	0	0	0	0	0	0	#DIV/0!	#DIV/0!	#DIV/0!	#DIV/0!	#DIV/0!	#DIV/0!	#DIV/0!	0
						#DIV/0!		#DIV/0!															#DIV/0!	#DIV/0!	#DIV/0!	#DIV/0!	#DIV/0!	#DIV/0!	#DIV/0!	#DIV/0!	#DIV/0!	#DIV/0!	#DIV/0!	#DIV/0!	#DIV/0!	0	0	0	0	0	0	#DIV/0!	#DIV/0!	#DIV/0!	#DIV/0!	#DIV/0!	#DIV/0!	#DIV/0!	0
						#DIV/0!		#DIV/0!															#DIV/0!	#DIV/0!	#DIV/0!	#DIV/0!	#DIV/0!	#DIV/0!	#DIV/0!	#DIV/0!	#DIV/0!	#DIV/0!	#DIV/0!	#DIV/0!	#DIV/0!	0	0	0	0	0	0	#DIV/0!	#DIV/0!	#DIV/0!	#DIV/0!	#DIV/0!	#DIV/0!	#DIV/0!	0
						#DIV/0!		#DIV/0!															#DIV/0!	#DIV/0!	#DIV/0!	#DIV/0!	#DIV/0!	#DIV/0!	#DIV/0!	#DIV/0!	#DIV/0!	#DIV/0!	#DIV/0!	#DIV/0!	#DIV/0!	0	0	0	0	0	0	#DIV/0!	#DIV/0!	#DIV/0!	#DIV/0!	#DIV/0!	#DIV/0!	#DIV/0!	0
						#DIV/0!		#DIV/0!															#DIV/0!	#DIV/0!	#DIV/0!	#DIV/0!	#DIV/0!	#DIV/0!	#DIV/0!	#DIV/0!	#DIV/0!	#DIV/0!	#DIV/0!	#DIV/0!	#DIV/0!	0	0	0	0	0	0	#DIV/0!	#DIV/0!	#DIV/0!	#DIV/0!	#DIV/0!	#DIV/0!	#DIV/0!	0
						#DIV/0!		#DIV/0!															#DIV/0!	#DIV/0!	#DIV/0!	#DIV/0!	#DIV/0!	#DIV/0!	#DIV/0!	#DIV/0!	#DIV/0!	#DIV/0!	#DIV/0!	#DIV/0!	#DIV/0!	0	0	0	0	0	0	#DIV/0!	#DIV/0!	#DIV/0!	#DIV/0!	#DIV/0!	#DIV/0!	#DIV/0!	0
						#DIV/0!		#DIV/0!															#DIV/0!	#DIV/0!	#DIV/0!	#DIV/0!	#DIV/0!	#DIV/0!	#DIV/0!	#DIV/0!	#DIV/0!	#DIV/0!	#DIV/0!	#DIV/0!	#DIV/0!	0	0	0	0	0	0	#DIV/0!	#DIV/0!	#DIV/0!	#DIV/0!	#DIV/0!	#DIV/0!	#DIV/0!	0
						#DIV/0!		#DIV/0!															#DIV/0!	#DIV/0!	#DIV/0!	#DIV/0!	#DIV/0!	#DIV/0!	#DIV/0!	#DIV/0!	#DIV/0!	#DIV/0!	#DIV/0!	#DIV/0!	#DIV/0!	0	0	0	0	0	0	#DIV/0!	#DIV/0!	#DIV/0!	#DIV/0!	#DIV/0!	#DIV/0!	#DIV/0!	0
						#DIV/0!		#DIV/0!															#DIV/0!	#DIV/0!	#DIV/0!	#DIV/0!	#DIV/0!	#DIV/0!	#DIV/0!	#DIV/0!	#DIV/0!	#DIV/0!	#DIV/0!	#DIV/0!	#DIV/0!	0	0	0	0	0	0	#DIV/0!	#DIV/0!	#DIV/0!	#DIV/0!	#DIV/0!	#DIV/0!	#DIV/0!	0
						#DIV/0!		#DIV/0!															#DIV/0!	#DIV/0!	#DIV/0!	#DIV/0!	#DIV/0!	#DIV/0!	#DIV/0!	#DIV/0!	#DIV/0!	#DIV/0!	#DIV/0!	#DIV/0!	#DIV/0!	0	0	0	0	0	0	#DIV/0!	#DIV/0!	#DIV/0!	#DIV/0!	#DIV/0!	#DIV/0!	#DIV/0!	0
						#DIV/0!		#DIV/0!															#DIV/0!	#DIV/0!	#DIV/0!	#DIV/0!	#DIV/0!	#DIV/0!	#DIV/0!	#DIV/0!	#DIV/0!	#DIV/0!	#DIV/0!	#DIV/0!	#DIV/0!	0	0	0	0	0	0	#DIV/0!	#DIV/0!	#DIV/0!	#DIV/0!	#DIV/0!	#DIV/0!	#DIV/0!	0
						#DIV/0!		#DIV/0!															#DIV/0!	#DIV/0!	#DIV/0!	#DIV/0!	#DIV/0!	#DIV/0!	#DIV/0!	#DIV/0!	#DIV/0!	#DIV/0!	#DIV/0!	#DIV/0!	#DIV/0!	0	0	0	0	0	0	#DIV/0!	#DIV/0!	#DIV/0!	#DIV/0!	#DIV/0!	#DIV/0!	#DIV/0!	0
						#DIV/0!		#DIV/0!															#DIV/0!	#DIV/0!	#DIV/0!	#DIV/0!	#DIV/0!	#DIV/0!	#DIV/0!	#DIV/0!	#DIV/0!	#DIV/0!	#DIV/0!	#DIV/0!	#DIV/0!	0	0	0	0	0	0	#DIV/0!	#DIV/0!	#DIV/0!	#DIV/0!	#DIV/0!	#DIV/0!	#DIV/0!	0
						#DIV/0!		#DIV/0!															#DIV/0!	#DIV/0!	#DIV/0!	#DIV/0!	#DIV/0!	#DIV/0!	#DIV/0!	#DIV/0!	#DIV/0!	#DIV/0!	#DIV/0!	#DIV/0!	#DIV/0!	0	0	0	0	0	0	#DIV/0!	#DIV/0!	#DIV/0!	#DIV/0!	#DIV/0!	#DIV/0!	#DIV/0!	0
						#DIV/0!		#DIV/0!															#DIV/0!	#DIV/0!	#DIV/0!	#DIV/0!	#DIV/0!	#DIV/0!	#DIV/0!	#DIV/0!	#DIV/0!	#DIV/0!	#DIV/0!	#DIV/0!	#DIV/0!	0	0	0	0	0	0	#DIV/0!	#DIV/0!	#DIV/0!	#DIV/0!	#DIV/0!	#DIV/0!	#DIV/0!	0
						#DIV/0!		#DIV/0!															#DIV/0!	#DIV/0!	#DIV/0!	#DIV/0!	#DIV/0!	#DIV/0!	#DIV/0!	#DIV/0!	#DIV/0!	#DIV/0!	#DIV/0!	#DIV/0!	#DIV/0!	0	0	0	0	0	0	#DIV/0!	#DIV/0!	#DIV/0!	#DIV/0!	#DIV/0!	#DIV/0!	#DIV/0!	0
						#DIV/0!		#DIV/0!															#DIV/0!	#DIV/0!	#DIV/0!	#DIV/0!	#DIV/0!	#DIV/0!	#DIV/0!	#DIV/0!	#DIV/0!	#DIV/0!	#DIV/0!	#DIV/0!	#DIV/0!	0	0	0	0	0	0	#DIV/0!	#DIV/0!	#DIV/0!	#DIV/0!	#DIV/0!	#DIV/0!	#DIV/0!	0
						#DIV/0!		#DIV/0!															#DIV/0!	#DIV/0!	#DIV/0!	#DIV/0!	#DIV/0!	#DIV/0!	#DIV/0!	#DIV/0!	#DIV/0!	#DIV/0!	#DIV/0!	#DIV/0!	#DIV/0!	0	0	0	0	0	0	#DIV/0!	#DIV/0!	#DIV/0!	#DIV/0!	#DIV/0!	#DIV/0!	#DIV/0!	0
						#DIV/0!		#DIV/0!															#DIV/0!	#DIV/0!	#DIV/0!	#DIV/0!	#DIV/0!	#DIV/0!	#DIV/0!	#DIV/0!	#DIV/0!	#DIV/0!	#DIV/0!	#DIV/0!	#DIV/0!	0	0	0	0	0	0	#DIV/0!	#DIV/0!	#DIV/0!	#DIV/0!	#DIV/0!	#DIV/0!	#DIV/0!	0
						#DIV/0!		#DIV/0!															#DIV/0!	#DIV/0!	#DIV/0!	#DIV/0!	#DIV/0!	#DIV/0!	#DIV/0!	#DIV/0!	#DIV/0!	#DIV/0!	#DIV/0!	#DIV/0!	#DIV/0!	0	0	0	0	0	0	#DIV/0!	#DIV/0!	#DIV/0!	#DIV/0!	#DIV/0!	#DIV/0!	#DIV/0!	0
						#DIV/0!		#DIV/0!															#DIV/0!	#DIV/0!	#DIV/0!	#DIV/0!	#DIV/0!	#DIV/0!	#DIV/0!	#DIV/0!	#DIV/0!	#DIV/0!	#DIV/0!	#DIV/0!	#DIV/0!	0	0	0	0	0	0	#DIV/0!	#DIV/0!	#DIV/0!	#DIV/0!	#DIV/0!	#DIV/0!	#DIV/0!	0
						#DIV/0!		#DIV/0!															#DIV/0!	#DIV/0!	#DIV/0!	#DIV/0!	#DIV/0!	#DIV/0!	#DIV/0!	#DIV/0!	#DIV/0!	#DIV/0!	#DIV/0!	#DIV/0!	#DIV/0!	0	0	0	0	0	0	#DIV/0!	#DIV/0!	#DIV/0!	#DIV/0!	#DIV/0!	#DIV/0!	#DIV/0!	0
						#DIV/0!		#DIV/0!															#DIV/0!	#DIV/0!	#DIV/0!	#DIV/0!	#DIV/0!	#DIV/0!	#DIV/0!	#DIV/0!	#DIV/0!	#DIV/0!	#DIV/0!	#DIV/0!	#DIV/0!	0	0	0	0	0	0	#DIV/0!	#DIV/0!	#DIV/0!	#DIV/0!	#DIV/0!	#DIV/0!	#DIV/0!	0
						#DIV/0!		#DIV/0!															#DIV/0!	#DIV/0!	#DIV/0!	#DIV/0!	#DIV/0!	#DIV/0!	#DIV/0!	#DIV/0!	#DIV/0!	#DIV/0!	#DIV/0!	#DIV/0!	#DIV/0!	0	0	0	0	0	0	#DIV/0!	#DIV/0!	#DIV/0!	#DIV/0!	#DIV/0!	#DIV/0!	#DIV/0!	0
						#DIV/0!		#DIV/0!															#DIV/0!	#DIV/0!	#DIV/0!	#DIV/0!	#DIV/0!	#DIV/0!	#DIV/0!	#DIV/0!	#DIV/0!	#DIV/0!	#DIV/0!	#DIV/0!	#DIV/0!	0	0	0	0	0	0	#DIV/0!	#DIV/0!	#DIV/0!	#DIV/0!	#DIV/0!	#DIV/0!	#DIV/0!	0
						#DIV/0!		#DIV/0!															#DIV/0!	#DIV/0!	#DIV/0!	#DIV/0!	#DIV/0!	#DIV/0!	#DIV/0!	#DIV/0!	#DIV/0!	#DIV/0!	#DIV/0!	#DIV/0!	#DIV/0!	0	0	0	0	0	0	#DIV/0!	#DIV/0!	#DIV/0!	#DIV/0!	#DIV/0!	#DIV/0!	#DIV/0!	0
						#DIV/0!		#DIV/0!															#DIV/0!	#DIV/0!	#DIV/0!	#DIV/0!	#DIV/0!	#DIV/0!	#DIV/0!	#DIV/0!	#DIV/0!	#DIV/0!	#DIV/0!	#DIV/0!	#DIV/0!	0	0	0	0	0	0	#DIV/0!	#DIV/0!	#DIV/0!	#DIV/0!	#DIV/0!	#DIV/0!	#DIV/0!	0
						#DIV/0!		#DIV/0!															#DIV/0!	#DIV/0!	#DIV/0!	#DIV/0!	#DIV/0!	#DIV/0!	#DIV/0!	#DIV/0!	#DIV/0!	#DIV/0!	#DIV/0!	#DIV/0!	#DIV/0!	0	0	0	0	0	0	#DIV/0!	#DIV/0!	#DIV/0!	#DIV/0!	#DIV/0!	#DIV/0!	#DIV/0!	0
						#DIV/0!		#DIV/0!															#DIV/0!	#DIV/0!	#DIV/0!	#DIV/0!	#DIV/0!	#DIV/0!	#DIV/0!	#DIV/0!	#DIV/0!	#DIV/0!	#DIV/0!	#DIV/0!	#DIV/0!	0	0	0	0	0	0	#DIV/0!	#DIV/0!	#DIV/0!	#DIV/0!	#DIV/0!	#DIV/0!	#DIV/0!	0
						#DIV/0!		#DIV/0!															#DIV/0!	#DIV/0!	#DIV/0!	#DIV/0!	#DIV/0!	#DIV/0!	#DIV/0!	#DIV/0!	#DIV/0!	#DIV/0!	#DIV/0!	#DIV/0!	#DIV/0!	0	0	0	0	0	0	#DIV/0!	#DIV/0!	#DIV/0!	#DIV/0!	#DIV/0!	#DIV/0!	#DIV/0!	0
						#DIV/0!		#DIV/0!															#DIV/0!	#DIV/0!	#DIV/0!	#DIV/0!	#DIV/0!	#DIV/0!	#DIV/0!	#DIV/0!	#DIV/0!	#DIV/0!	#DIV/0!	#DIV/0!	#DIV/0!	0	0	0	0	0	0	#DIV/0!	#DIV/0!	#DIV/0!	#DIV/0!	#DIV/0!	#DIV/0!	#DIV/0!	0
						#DIV/0!		#DIV/0!															#DIV/0!	#DIV/0!	#DIV/0!	#DIV/0!	#DIV/0!	#DIV/0!	#DIV/0!	#DIV/0!	#DIV/0!	#DIV/0!	#DIV/0!	#DIV/0!	#DIV/0!	0	0	0	0	0	0	#DIV/0!	#DIV/0!	#DIV/0!	#DIV/0!	#DIV/0!	#DIV/0!	#DIV/0!	0
						#DIV/0!		#DIV/0!															#DIV/0!	#DIV/0!	#DIV/0!	#DIV/0!	#DIV/0!	#DIV/0!	#DIV/0!	#DIV/0!	#DIV/0!	#DIV/0!	#DIV/0!	#DIV/0!	#DIV/0!	0	0	0	0	0	0	#DIV/0!	#DIV/0!	#DIV/0!	#DIV/0!	#DIV/0!	#DIV/0!	#DIV/0!	0
						#DIV/0!		#DIV/0!															#DIV/0!	#DIV/0!	#DIV/0!	#DIV/0!	#DIV/0!	#DIV/0!	#DIV/0!	#DIV/0!	#DIV/0!	#DIV/0!	#DIV/0!	#DIV/0!	#DIV/0!	0	0	0	0	0	0	#DIV/0!	#DIV/0!	#DIV/0!	#DIV/0!	#DIV/0!	#DIV/0!	#DIV/0!	0
						#DIV/0!		#DIV/0!															#DIV/0!	#DIV/0!	#DIV/0!	#DIV/0!	#DIV/0!	#DIV/0!	#DIV/0!	#DIV/0!	#DIV/0!	#DIV/0!	#DIV/0!	#DIV/0!	#DIV/0!	0	0	0	0	0	0	#DIV/0!	#DIV/0!	#DIV/0!	#DIV/0!	#DIV/0!	#DIV/0!	#DIV/0!	0
						#DIV/0!		#DIV/0!															#DIV/0!	#DIV/0!	#DIV/0!	#DIV/0!	#DIV/0!	#DIV/0!	#DIV/0!	#DIV/0!	#DIV/0!	#DIV/0!	#DIV/0!	#DIV/0!	#DIV/0!	0	0	0	0	0	0	#DIV/0!	#DIV/0!	#DIV/0!	#DIV/0!	#DIV/0!	#DIV/0!	#DIV/0!	0
						#DIV/0!		#DIV/0!															#DIV/0!	#DIV/0!	#DIV/0!	#DIV/0!	#DIV/0!	#DIV/0!	#DIV/0!	#DIV/0!	#DIV/0!	#DIV/0!	#DIV/0!	#DIV/0!	#DIV/0!	0	0	0	0	0	0	#DIV/0!	#DIV/0!	#DIV/0!	#DIV/0!	#DIV/0!	#DIV/0!	#DIV/0!	0
						#DIV/0!		#DIV/0!															#DIV/0!	#DIV/0!	#DIV/0!	#DIV/0!	#DIV/0!	#DIV/0!	#DIV/0!	#DIV/0!	#DIV/0!	#DIV/0!	#DIV/0!	#DIV/0!	#DIV/0!	0	0	0	0	0	0	#DIV/0!	#DIV/0!	#DIV/0!	#DIV/0!	#DIV/0!	#DIV/0!	#DIV/0!	0
						#DIV/0!		#DIV/0!															#DIV/0!	#DIV/0!	#DIV/0!	#DIV/0!	#DIV/0!	#DIV/0!	#DIV/0!	#DIV/0!	#DIV/0!	#DIV/0!	#DIV/0!	#DIV/0!	#DIV/0!	0	0	0	0	0	0	#DIV/0!	#DIV/0!	#DIV/0!	#DIV/0!	#DIV/0!	#DIV/0!	#DIV/0!	0
						#DIV/0!		#DIV/0!															#DIV/0!	#DIV/0!	#DIV/0!	#DIV/0!	#DIV/0!	#DIV/0!	#DIV/0!	#DIV/0!	#DIV/0!	#DIV/0!	#DIV/0!	#DIV/0!	#DIV/0!	0	0	0	0	0	0	#DIV/0!	#DIV/0!	#DIV/0!	#DIV/0!	#DIV/0!	#DIV/0!	#DIV/0!	0
						#DIV/0!		#DIV/0!															#DIV/0!	#DIV/0!	#DIV/0!	#DIV/0!	#DIV/0!	#DIV/0!	#DIV/0!	#DIV/0!	#DIV/0!	#DIV/0!	#DIV/0!	#DIV/0!	#DIV/0!	0	0	0	0	0	0	#DIV/0!	#DIV/0!	#DIV/0!	#DIV/0!	#DIV/0!	#DIV/0!	#DIV/0!	0
						#DIV/0!		#DIV/0!															#DIV/0!	#DIV/0!	#DIV/0!	#DIV/0!	#DIV/0!	#DIV/0!	#DIV/0!	#DIV/0!	#DIV/0!	#DIV/0!	#DIV/0!	#DIV/0!	#DIV/0!	0	0	0	0	0	0	#DIV/0!	#DIV/0!	#DIV/0!	#DIV/0!	#DIV/0!	#DIV/0!	#DIV/0!	0
						#DIV/0!		#DIV/0!															#DIV/0!	#DIV/0!	#DIV/0!	#DIV/0!	#DIV/0!	#DIV/0!	#DIV/0!	#DIV/0!	#DIV/0!	#DIV/0!	#DIV/0!	#DIV/0!	#DIV/0!	0	0	0	0	0	0	#DIV/0!	#DIV/0!	#DIV/0!	#DIV/0!	#DIV/0!	#DIV/0!	#DIV/0!	0
						#DIV/0!		#DIV/0!															#DIV/0!	#DIV/0!	#DIV/0!	#DIV/0!	#DIV/0!	#DIV/0!	#DIV/0!	#DIV/0!	#DIV/0!	#DIV/0!	#DIV/0!	#DIV/0!	#DIV/0!	0	0	0	0	0	0	#DIV/0!	#DIV/0!	#DIV/0!	#DIV/0!	#DIV/0!	#DIV/0!	#DIV/0!	0
						#DIV/0!		#DIV/0!															#DIV/0!	#DIV/0!	#DIV/0!	#DIV/0!	#DIV/0!	#DIV/0!	#DIV/0!	#DIV/0!	#DIV/0!	#DIV/0!	#DIV/0!	#DIV/0!	#DIV/0!	0	0	0	0	0	0	#DIV/0!	#DIV/0!	#DIV/0!	#DIV/0!	#DIV/0!	#DIV/0!	#DIV/0!	0
						#DIV/0!		#DIV/0!															#DIV/0!	#DIV/0!	#DIV/0!	#DIV/0!	#DIV/0!	#DIV/0!	#DIV/0!	#DIV/0!	#DIV/0!	#DIV/0!	#DIV/0!	#DIV/0!	#DIV/0!	0	0	0	0	0	0	#DIV/0!	#DIV/0!	#DIV/0!	#DIV/0!	#DIV/0!	#DIV/0!	#DIV/0!	0
						#DIV/0!		#DIV/0!															#DIV/0!	#DIV/0!	#DIV/0!	#DIV/0!	#DIV/0!	#DIV/0!	#DIV/0!	#DIV/0!	#DIV/0!	#DIV/0!	#DIV/0!	#DIV/0!	#DIV/0!	0	0	0	0	0	0	#DIV/0!	#DIV/0!	#DIV/0!	#DIV/0!	#DIV/0!	#DIV/0!	#DIV/0!	0
						#DIV/0!		#DIV/0!															#DIV/0!	#DIV/0!	#DIV/0!	#DIV/0!	#DIV/0!	#DIV/0!	#DIV/0!	#DIV/0!	#DIV/0!	#DIV/0!	#DIV/0!	#DIV/0!	#DIV/0!	0	0	0	0	0	0	#DIV/0!	#DIV/0!	#DIV/0!	#DIV/0!	#DIV/0!	#DIV/0!	#DIV/0!	0
						#DIV/0!		#DIV/0!															#DIV/0!	#DIV/0!	#DIV/0!	#DIV/0!	#DIV/0!	#DIV/0!	#DIV/0!	#DIV/0!	#DIV/0!	#DIV/0!	#DIV/0!	#DIV/0!	#DIV/0!	0	0	0	0	0	0	#DIV/0!	#DIV/0!	#DIV/0!	#DIV/0!	#DIV/0!	#DIV/0!	#DIV/0!	0
						#DIV/0!		#DIV/0!															#DIV/0!	#DIV/0!	#DIV/0!	#DIV/0!	#DIV/0!	#DIV/0!	#DIV/0!	#DIV/0!	#DIV/0!	#DIV/0!	#DIV/0!	#DIV/0!	#DIV/0!	0	0	0	0	0	0	#DIV/0!	#DIV/0!	#DIV/0!	#DIV/0!	#DIV/0!	#DIV/0!	#DIV/0!	0
						#DIV/0!		#DIV/0!															#DIV/0!	#DIV/0!	#DIV/0!	#DIV/0!	#DIV/0!	#DIV/0!	#DIV/0!	#DIV/0!	#DIV/0!	#DIV/0!	#DIV/0!	#DIV/0!	#DIV/0!	0	0	0	0	0	0	#DIV/0!	#DIV/0!	#DIV/0!	#DIV/0!	#DIV/0!	#DIV/0!	#DIV/0!	0
						#DIV/0!		#DIV/0!															#DIV/0!	#DIV/0!	#DIV/0!	#DIV/0!	#DIV/0!	#DIV/0!	#DIV/0!	#DIV/0!	#DIV/0!	#DIV/0!	#DIV/0!	#DIV/0!	#DIV/0!	0	0	0	0	0	0	#DIV/0!	#DIV/0!	#DIV/0!	#DIV/0!	#DIV/0!	#DIV/0!	#DIV/0!	0
						#DIV/0!		#DIV/0!															#DIV/0!	#DIV/0!	#DIV/0!	#DIV/0!	#DIV/0!	#DIV/0!	#DIV/0!	#DIV/0!	#DIV/0!	#DIV/0!	#DIV/0!	#DIV/0!	#DIV/0!	0	0	0	0	0	0	#DIV/0!	#DIV/0!	#DIV/0!	#DIV/0!	#DIV/0!	#DIV/0!	#DIV/0!	0
						#DIV/0!		#DIV/0!															#DIV/0!	#DIV/0!	#DIV/0!	#DIV/0!	#DIV/0!	#DIV/0!	#DIV/0!	#DIV/0!	#DIV/0!	#DIV/0!	#DIV/0!	#DIV/0!	#DIV/0!	0	0	0	0	0	0	#DIV/0!	#DIV/0!	#DIV/0!	#DIV/0!	#DIV/0!	#DIV/0!	#DIV/0!	0
						#DIV/0!		#DIV/0!															#DIV/0!	#DIV/0!	#DIV/0!	#DIV/0!	#DIV/0!	#DIV/0!	#DIV/0!	#DIV/0!	#DIV/0!	#DIV/0!	#DIV/0!	#DIV/0!	#DIV/0!	0	0	0	0	0	0	#DIV/0!	#DIV/0!	#DIV/0!	#DIV/0!	#DIV/0!	#DIV/0!	#DIV/0!	0
						#DIV/0!		#DIV/0!															#DIV/0!	#DIV/0!	#DIV/0!	#DIV/0!	#DIV/0!	#DIV/0!	#DIV/0!	#DIV/0!	#DIV/0!	#DIV/0!	#DIV/0!	#DIV/0!	#DIV/0!	0	0	0	0	0	0	#DIV/0!	#DIV/0!	#DIV/0!	#DIV/0!	#DIV/0!	#DIV/0!	#DIV/0!	0
						#DIV/0!		#DIV/0!															#DIV/0!	#DIV/0!	#DIV/0!	#DIV/0!	#DIV/0!	#DIV/0!	#DIV/0!	#DIV/0!	#DIV/0!	#DIV/0!	#DIV/0!	#DIV/0!	#DIV/0!	0	0	0	0	0	0	#DIV/0!	#DIV/0!	#DIV/0!	#DIV/0!	#DIV/0!	#DIV/0!	#DIV/0!	0
						#DIV/0!		#DIV/0!															#DIV/0!	#DIV/0!	#DIV/0!	#DIV/0!	#DIV/0!	#DIV/0!	#DIV/0!	#DIV/0!	#DIV/0!	#DIV/0!	#DIV/0!	#DIV/0!	#DIV/0!	0	0	0	0	0	0	#DIV/0!	#DIV/0!	#DIV/0!	#DIV/0!	#DIV/0!	#DIV/0!	#DIV/0!	0
						#DIV/0!		#DIV/0!															#DIV/0!	#DIV/0!	#DIV/0!	#DIV/0!	#DIV/0!	#DIV/0!	#DIV/0!	#DIV/0!	#DIV/0!	#DIV/0!	#DIV/0!	#DIV/0!	#DIV/0!	0	0	0	0	0	0	#DIV/0!	#DIV/0!	#DIV/0!	#DIV/0!	#DIV/0!	#DIV/0!	#DIV/0!	0
						#DIV/0!		#DIV/0!															#DIV/0!	#DIV/0!	#DIV/0!	#DIV/0!	#DIV/0!	#DIV/0!	#DIV/0!	#DIV/0!	#DIV/0!	#DIV/0!	#DIV/0!	#DIV/0!	#DIV/0!	0	0	0	0	0	0	#DIV/0!	#DIV/0!	#DIV/0!	#DIV/0!	#DIV/0!	#DIV/0!	#DIV/0!	0
						#DIV/0!		#DIV/0!															#DIV/0!	#DIV/0!	#DIV/0!	#DIV/0!	#DIV/0!	#DIV/0!	#DIV/0!	#DIV/0!	#DIV/0!	#DIV/0!	#DIV/0!	#DIV/0!	#DIV/0!	0	0	0	0	0	0	#DIV/0!	#DIV/0!	#DIV/0!	#DIV/0!	#DIV/0!	#DIV/0!	#DIV/0!	0
						#DIV/0!		#DIV/0!															#DIV/0!	#DIV/0!	#DIV/0!	#DIV/0!	#DIV/0!	#DIV/0!	#DIV/0!	#DIV/0!	#DIV/0!	#DIV/0!	#DIV/0!	#DIV/0!	#DIV/0!	0	0	0	0	0	0	#DIV/0!	#DIV/0!	#DIV/0!	#DIV/0!	#DIV/0!	#DIV/0!	#DIV/0!	0
						#DIV/0!		#DIV/0!															#DIV/0!	#DIV/0!	#DIV/0!	#DIV/0!	#DIV/0!	#DIV/0!	#DIV/0!	#DIV/0!	#DIV/0!	#DIV/0!	#DIV/0!	#DIV/0!	#DIV/0!	0	0	0	0	0	0	#DIV/0!	#DIV/0!	#DIV/0!	#DIV/0!	#DIV/0!	#DIV/0!	#DIV/0!	0
						#DIV/0!		#DIV/0!															#DIV/0!	#DIV/0!	#DIV/0!	#DIV/0!	#DIV/0!	#DIV/0!	#DIV/0!	#DIV/0!	#DIV/0!	#DIV/0!	#DIV/0!	#DIV/0!	#DIV/0!	0	0	0	0	0	0	#DIV/0!	#DIV/0!	#DIV/0!	#DIV/0!	#DIV/0!	#DIV/0!	#DIV/0!	0
						#DIV/0!		#DIV/0!															#DIV/0!	#DIV/0!	#DIV/0!	#DIV/0!	#DIV/0!	#DIV/0!	#DIV/0!	#DIV/0!	#DIV/0!	#DIV/0!	#DIV/0!	#DIV/0!	#DIV/0!	0	0	0	0	0	0	#DIV/0!	#DIV/0!	#DIV/0!	#DIV/0!	#DIV/0!	#DIV/0!	#DIV/0!	0
						#DIV/0!		#DIV/0!															#DIV/0!	#DIV/0!	#DIV/0!	#DIV/0!	#DIV/0!	#DIV/0!	#DIV/0!	#DIV/0!	#DIV/0!	#DIV/0!	#DIV/0!	#DIV/0!	#DIV/0!	0	0	0	0	0	0	#DIV/0!	#DIV/0!	#DIV/0!	#DIV/0!	#DIV/0!	#DIV/0!	#DIV/0!	0
						#DIV/0!		#DIV/0!															#DIV/0!	#DIV/0!	#DIV/0!	#DIV/0!	#DIV/0!	#DIV/0!	#DIV/0!	#DIV/0!	#DIV/0!	#DIV/0!	#DIV/0!	#DIV/0!	#DIV/0!	0	0	0	0	0	0	#DIV/0!	#DIV/0!	#DIV/0!	#DIV/0!	#DIV/0!	#DIV/0!	#DIV/0!	0
						#DIV/0!		#DIV/0!															#DIV/0!	#DIV/0!	#DIV/0!	#DIV/0!	#DIV/0!	#DIV/0!	#DIV/0!	#DIV/0!	#DIV/0!	#DIV/0!	#DIV/0!	#DIV/0!	#DIV/0!	0	0	0	0	0	0	#DIV/0!	#DIV/0!	#DIV/0!	#DIV/0!	#DIV/0!	#DIV/0!	#DIV/0!	0
						#DIV/0!		#DIV/0!															#DIV/0!	#DIV/0!	#DIV/0!	#DIV/0!	#DIV/0!	#DIV/0!	#DIV/0!	#DIV/0!	#DIV/0!	#DIV/0!	#DIV/0!	#DIV/0!	#DIV/0!	0	0	0	0	0	0	#DIV/0!	#DIV/0!	#DIV/0!	#DIV/0!	#DIV/0!	#DIV/0!	#DIV/0!	0
						#DIV/0!		#DIV/0!															#DIV/0!	#DIV/0!	#DIV/0!	#DIV/0!	#DIV/0!	#DIV/0!	#DIV/0!	#DIV/0!	#DIV/0!	#DIV/0!	#DIV/0!	#DIV/0!	#DIV/0!	0	0	0	0	0	0	#DIV/0!	#DIV/0!	#DIV/0!	#DIV/0!	#DIV/0!	#DIV/0!	#DIV/0!	0
						#DIV/0!		#DIV/0!															#DIV/0!	#DIV/0!	#DIV/0!	#DIV/0!	#DIV/0!	#DIV/0!	#DIV/0!	#DIV/0!	#DIV/0!	#DIV/0!	#DIV/0!	#DIV/0!	#DIV/0!	0	0	0	0	0	0	#DIV/0!	#DIV/0!	#DIV/0!	#DIV/0!	#DIV/0!	#DIV/0!	#DIV/0!	0
						#DIV/0!		#DIV/0!															#DIV/0!	#DIV/0!	#DIV/0!	#DIV/0!	#DIV/0!	#DIV/0!	#DIV/0!	#DIV/0!	#DIV/0!	#DIV/0!	#DIV/0!	#DIV/0!	#DIV/0!	0	0	0	0	0	0	#DIV/0!	#DIV/0!	#DIV/0!	#DIV/0!	#DIV/0!	#DIV/0!	#DIV/0!	0
						#DIV/0!		#DIV/0!															#DIV/0!	#DIV/0!	#DIV/0!	#DIV/0!	#DIV/0!	#DIV/0!	#DIV/0!	#DIV/0!	#DIV/0!	#DIV/0!	#DIV/0!	#DIV/0!	#DIV/0!	0	0	0	0	0	0	#DIV/0!	#DIV/0!	#DIV/0!	#DIV/0!	#DIV/0!	#DIV/0!	#DIV/0!	0
						#DIV/0!		#DIV/0!															#DIV/0!	#DIV/0!	#DIV/0!	#DIV/0!	#DIV/0!	#DIV/0!	#DIV/0!	#DIV/0!	#DIV/0!	#DIV/0!	#DIV/0!	#DIV/0!	#DIV/0!	0	0	0	0	0	0	#DIV/0!	#DIV/0!	#DIV/0!	#DIV/0!	#DIV/0!	#DIV/0!	#DIV/0!	0
						#DIV/0!		#DIV/0!															#DIV/0!	#DIV/0!	#DIV/0!	#DIV/0!	#DIV/0!	#DIV/0!	#DIV/0!	#DIV/0!	#DIV/0!	#DIV/0!	#DIV/0!	#DIV/0!	#DIV/0!	0	0	0	0	0	0	#DIV/0!	#DIV/0!	#DIV/0!	#DIV/0!	#DIV/0!	#DIV/0!	#DIV/0!	0
						#DIV/0!		#DIV/0!															#DIV/0!	#DIV/0!	#DIV/0!	#DIV/0!	#DIV/0!	#DIV/0!	#DIV/0!	#DIV/0!	#DIV/0!	#DIV/0!	#DIV/0!	#DIV/0!	#DIV/0!	0	0	0	0	0	0	#DIV/0!	#DIV/0!	#DIV/0!	#DIV/0!	#DIV/0!	#DIV/0!	#DIV/0!	0
						#DIV/0!		#DIV/0!															#DIV/0!	#DIV/0!	#DIV/0!	#DIV/0!	#DIV/0!	#DIV/0!	#DIV/0!	#DIV/0!	#DIV/0!	#DIV/0!	#DIV/0!	#DIV/0!	#DIV/0!	0	0	0	0	0	0	#DIV/0!	#DIV/0!	#DIV/0!	#DIV/0!	#DIV/0!	#DIV/0!	#DIV/0!	0
						#DIV/0!		#DIV/0!															#DIV/0!	#DIV/0!	#DIV/0!	#DIV/0!	#DIV/0!	#DIV/0!	#DIV/0!	#DIV/0!	#DIV/0!	#DIV/0!	#DIV/0!	#DIV/0!	#DIV/0!	0	0	0	0	0	0	#DIV/0!	#DIV/0!	#DIV/0!	#DIV/0!	#DIV/0!	#DIV/0!	#DIV/0!	0
						#DIV/0!		#DIV/0!															#DIV/0!	#DIV/0!	#DIV/0!	#DIV/0!	#DIV/0!	#DIV/0!	#DIV/0!	#DIV/0!	#DIV/0!	#DIV/0!	#DIV/0!	#DIV/0!	#DIV/0!	0	0	0	0	0	0	#DIV/0!	#DIV/0!	#DIV/0!	#DIV/0!	#DIV/0!	#DIV/0!	#DIV/0!	0
						#DIV/0!		#DIV/0!															#DIV/0!	#DIV/0!	#DIV/0!	#DIV/0!	#DIV/0!	#DIV/0!	#DIV/0!	#DIV/0!	#DIV/0!	#DIV/0!	#DIV/0!	#DIV/0!	#DIV/0!	0	0	0	0	0	0	#DIV/0!	#DIV/0!	#DIV/0!	#DIV/0!	#DIV/0!	#DIV/0!	#DIV/0!	0
						#DIV/0!		#DIV/0!															#DIV/0!	#DIV/0!	#DIV/0!	#DIV/0!	#DIV/0!	#DIV/0!	#DIV/0!	#DIV/0!	#DIV/0!	#DIV/0!	#DIV/0!	#DIV/0!	#DIV/0!	0	0	0	0	0	0	#DIV/0!	#DIV/0!	#DIV/0!	#DIV/0!	#DIV/0!	#DIV/0!	#DIV/0!	0
						#DIV/0!		#DIV/0!															#DIV/0!	#DIV/0!	#DIV/0!	#DIV/0!	#DIV/0!	#DIV/0!	#DIV/0!	#DIV/0!	#DIV/0!	#DIV/0!	#DIV/0!	#DIV/0!	#DIV/0!	0	0	0	0	0	0	#DIV/0!	#DIV/0!	#DIV/0!	#DIV/0!	#DIV/0!	#DIV/0!	#DIV/0!	0
						#DIV/0!		#DIV/0!															#DIV/0!	#DIV/0!	#DIV/0!	#DIV/0!	#DIV/0!	#DIV/0!	#DIV/0!	#DIV/0!	#DIV/0!	#DIV/0!	#DIV/0!	#DIV/0!	#DIV/0!	0	0	0	0	0	0	#DIV/0!	#DIV/0!	#DIV/0!	#DIV/0!	#DIV/0!	#DIV/0!	#DIV/0!	0
						#DIV/0!		#DIV/0!
						#DIV/0!		#DIV/0!
						#DIV/0!		#DIV/0!
						#DIV/0!		#DIV/0!
						#DIV/0!		#DIV/0!
						#DIV/0!		#DIV/0!
						#DIV/0!		#DIV/0!
						#DIV/0!		#DIV/0!
						#DIV/0!		#DIV/0!
						#DIV/0!		#DIV/0!
						#DIV/0!		#DIV/0!
						#DIV/0!		#DIV/0!
						#DIV/0!		#DIV/0!
						#DIV/0!		#DIV/0!
						#DIV/0!		#DIV/0!
[truncated: 33 more columns]

## Sheet: Site3
Date:	14/8/2014
Site No. :	3V23
									Trans for Com afr, Pte bre, Mae par, Dal mel, Cis cor, Col mop, Dic cin, Sec vir
			Width (m)	Length (m)	Area (ha)			Length (m)	Width (m)	Length (m)	Area (ha)
	Transect Dimensions:		10	50	0.05				25	50	0.125
	Co-ordinates:			X	Y			X		X	Y
			NW Corner						NW Corner
			SW Corner						SW Corner
			NE Corner						NE Corner
			SE Corner						SE Corner
									OED		OUD	NED		NUD	NFD	OFD	OBE	OBU	NBE	NBU	RE	Notes	Canopy volume (m3)																				Damage
Trans. No.	Sp. Code	Coppice	Height (m)	D1 (m)	D2 (m)	R	Shape	Adj. shape	Score	Eaten		Score	Eaten										Total	0.5	1	2	3	4	5	0.5	1	2	3	4	5	OED	OUD	NED	NUD	NFD	OFD	Old Rec. Vol.	OED	OUD	NED	NUD	NFD	OFD	Sp. Code
1	Cis cor	T	0.9	1.7	1.5	0.8	6	7															1.27232	0.937552	1.24617	-3.15813	-19.4885	-54.022	-113.035	0.937552	1.27232	1.27232	1.27232	1.27232	1.27232	0	0	0	0	0	0	1.27232	0	0	0	0	0	0	Cis cor
1	Dic cin	T	2.5	2.3	1.9	1.05	3	3															2.88345	1.40712	2.26063	2.86038	2.90652	3.50628	5.7669	1.40712	2.26063	2.86038	2.88345	2.88345	2.88345	0	0	0	0	0	0	2.88345	0	0	0	0	0	0	Dic cin
1	Gre fla	T	2.15	3.5	3.6	1.775	3	3	1	1													7.08646	3.88339	6.00201	7.08405	7.52435	11.6012	23.5927	3.88339	6.00201	7.08405	7.08646	7.08646	7.08646	5.5	0	0	0	0	0	7.4989	41.2439	0	0	0	0	0	Gre fla
1	Col mop	T	0.35	0.7	0.6	0.325	1	1															0.116141	0.165915	0.331831	0.663661	0.995492	1.32732	1.65915	0.116141	0.116141	0.116141	0.116141	0.116141	0.116141	0	0	0	0	0	0	0.116141	0	0	0	0	0	0	Col mop
1	Gre bic	T	1.88	2.1	1.7	0.95	3	3	2	1													1.775	1.07296	1.59296	1.77546	2.1503	4.32027	9.88815	1.07296	1.59296	1.775	1.775	1.775	1.775	18	0	0	0	0	0	2.16464	38.9635	0	0	0	0	0	Gre bic
1	Gre bic	T	2.2	2.1	2.15	1.0625	3	3			2												2.59821	1.39939	2.17656	2.59626	2.72315	4.02128	7.95471	1.39939	2.17656	2.59626	2.59821	2.59821	2.59821	0	18	0	0	0	0	3.16855	0	57.0339	0	0	0	0	Gre bic
1	Gre bic	T	2.7	2.9	2.7	1.4	3	3	1	1													5.53623	2.54127	4.15435	5.43975	5.54382	6.15418	8.95843	2.54127	4.15435	5.43975	5.53623	5.53623	5.53623	5.5	0	0	0	0	0	5.85844	32.2214	0	0	0	0	0	Gre bic
1	Gre bic	T	2.55	2.3	2.5	1.2	1	1	1	1						2							11.5359	2.26195	4.52389	9.04779	13.5717	18.0956	22.6195	2.26195	4.52389	9.04779	11.5359	11.5359	11.5359	5.5	0	0	0	0	18	15.0796	82.938	0	0	0	0	271.434	Gre bic
1	Dic cin	T	1.1	1.55	1.5	0.7625	1	1			3												2.0092	0.913271	1.82654	3.65308	5.47962	7.30617	9.13271	0.913271	1.82654	2.0092	2.0092	2.0092	2.0092	0	38	0	0	0	0	3.24064	0	123.144	0	0	0	0	Dic cin
1	Dic cin	T	1.08	0.9	1.1	0.5	3	3															0.282461	0.238711	0.282346	0.457063	1.86951	5.86504	13.789	0.238711	0.282346	0.282461	0.282461	0.282461	0.282461	0	0	0	0	0	0	0.282461	0	0	0	0	0	0	Dic cin
1	Dic cin	T	0.6	0.45	0.25	0.175	3	3															0.019223	0.019134	0.0249187	0.263426	1.2495	3.5171	7.60021	0.019134	0.019223	0.019223	0.019223	0.019223	0.019223	0	0	0	0	0	0	0.019223	0	0	0	0	0	0	Dic cin
1	Gre fla	T	2.13	3.2	3.4	1.65	1	1			1												18.2179	4.27649	8.55299	17.106	25.659	34.2119	42.7649	4.27649	8.55299	17.106	18.2179	18.2179	18.2179	0	5.5	0	0	0	0	19.2782	0	106.03	0	0	0	0	Gre fla
1	Gre bic	T	2.9	2.5	3.1	1.4	1	1			2												17.8568	3.07876	6.15752	12.315	18.4726	24.6301	30.7876	3.07876	6.15752	12.315	17.8568	17.8568	17.8568	0	18	0	0	0	0	21.7766	0	391.979	0	0	0	0	Gre bic
1	Pte bre	T	1.75	1.15	1.25	0.6	3	3			1												0.659075	0.418887	0.607194	0.660996	0.899262	2.05985	4.88061	0.418887	0.607194	0.659075	0.659075	0.659075	0.659075	0	5.5	0	0	0	0	0.697434	0	3.83588	0	0	0	0	Pte bre
1	Col mop	T	0.23	0.35	0.3	0.1625	5	1															0.0190803	0.0414788	0.0829577	0.165915	0.248873	0.331831	0.414788	0.0190803	0.0190803	0.0190803	0.0190803	0.0190803	0.0190803	0	0	0	0	0	0	0.0190803	0	0	0	0	0	0	Col mop
1	Col mop	T	0.58	0.7	0.6	0.325	1	1															0.192462	0.165915	0.331831	0.663661	0.995492	1.32732	1.65915	0.165915	0.192462	0.192462	0.192462	0.192462	0.192462	0	0	0	0	0	0	0.192462	0	0	0	0	0	0	Col mop
1	Col mop	T	0.37	0.3	0.3	0.15	1	1			1												0.0261538	0.0353429	0.0706858	0.141372	0.212058	0.282743	0.353429	0.0261538	0.0261538	0.0261538	0.0261538	0.0261538	0.0261538	0	5.5	0	0	0	0	0.0276759	0	0.152218	0	0	0	0	Col mop
1	Col mop	T	0.45	0.13	0.08	0.0525	7	7															0.00374472	0.00320203	-0.220151	-4.28785	-18.4143	-48.8763	-101.951	0.00374472	0.00374472	0.00374472	0.00374472	0.00374472	0.00374472	0	0	0	0	0	0	0.00374472	0	0	0	0	0	0	Col mop
1	Col mop	T	0.59	0.39	0.15	0.135	7	7															0.0311991	0.0285299	-0.112125	-3.74373	-17.0732	-46.3773	-97.933	0.0285299	0.0311991	0.0311991	0.0311991	0.0311991	0.0311991	0	0	0	0	0	0	0.0311991	0	0	0	0	0	0	Col mop
1	Gre bic	T	2.85	4.35	4.15	2.125	1	1	2	1													40.4308	7.09313	14.1863	28.3725	42.5588	56.745	70.9313	7.09313	14.1863	28.3725	40.4308	40.4308	40.4308	18	0	0	0	0	0	49.3059	887.506	0	0	0	0	0	Gre bic
1	Col mop	T	1.03	0.83	0.85	0.451667	4	4															0.385574	0.223615	0.371383	-2.69907	-15.4883	-44.2731	-95.3305	0.223615	0.385574	0.385574	0.385574	0.385574	0.385574	0	0	0	0	0	0	0.385574	0	0	0	0	0	0	Col mop
1	Col mop	T	1	0.65	0.67	0.33	1	1															0.342119	0.17106	0.342119	0.684239	1.02636	1.36848	1.7106	0.17106	0.342119	0.342119	0.342119	0.342119	0.342119	0	0	0	0	0	0	0.342119	0	0	0	0	0	0	Col mop
1	Cis cor	T	0.78	1.42	2.08	0.875	6	1			1												1.87612	1.20264	2.40528	4.81056	7.21585	9.62113	12.0264	1.20264	1.87612	1.87612	1.87612	1.87612	1.87612	0	5.5	0	0	0	0	1.98531	0	10.9192	0	0	0	0	Cis cor
1	Col mop	T	0.58	0.7	0.4	0.275	1	1			1												0.137798	0.118791	0.237583	0.475166	0.712749	0.950332	1.18791	0.118791	0.137798	0.137798	0.137798	0.137798	0.137798	0	5.5	0	0	0	0	0.145818	0	0.802	0	0	0	0	Col mop
1	Col mop	T	0.44	0.37	0.3	0.1675	1	1															0.0387822	0.0440707	0.0881413	0.176283	0.264424	0.352565	0.440707	0.0387822	0.0387822	0.0387822	0.0387822	0.0387822	0.0387822	0	0	0	0	0	0	0.0387822	0	0	0	0	0	0	Col mop
1	Pte bre	T	1.6	1.93	1.62	0.8875	3	3			2												1.31841	0.889992	1.24889	1.33901	2.20164	5.76805	13.9695	0.889992	1.24889	1.31841	1.31841	1.31841	1.31841	0	18	0	0	0	0	1.60782	0	28.9407	0	0	0	0	Pte bre
1	Col mop	T	2.85	2.79	3.26	1.48333	4	4	2														13.6575	1.03307	3.60922	10.2523	13.6523	7.53228	-14.3846	1.03307	3.60922	10.2523	13.6575	13.6575	13.6575	18	0	0	0	0	0	16.6555	299.798	0	0	0	0	0	Col mop
1	Col mop	T	0.95	1.23	0.35	0.395	7	7			2												0.400991	0.245083	0.397761	-2.17682	-13.8215	-40.8132	-89.4289	0.245083	0.400991	0.400991	0.400991	0.400991	0.400991	0	18	0	0	0	0	0.489013	0	8.80224	0	0	0	0	Col mop
1	Col mop	T	0.3	0.45	0.25	0.175	6	7															0.0232398	-0.00709853	-0.604712	-6.70377	-24.572	-60.4864	-120.724	0.0232398	0.0232398	0.0232398	0.0232398	0.0232398	0.0232398	0	0	0	0	0	0	0.0232398	0	0	0	0	0	0	Col mop
1	Col mop	T	0.21	0.25	0.1	0.0933333	4	4															0.00340224	-0.0575383	-0.753228	-7.19751	-25.6098	-62.2669	-123.446	0.00340224	0.00340224	0.00340224	0.00340224	0.00340224	0.00340224	0	0	0	0	0	0	0.00340224	0	0	0	0	0	0	Col mop
1	Col mop	T	0.4	0.6	0.5	0.275	5	1															0.0950332	0.118791	0.237583	0.475166	0.712749	0.950332	1.18791	0.0950332	0.0950332	0.0950332	0.0950332	0.0950332	0.0950332	0	0	0	0	0	0	0.0950332	0	0	0	0	0	0	Col mop
1	Col mop	T	0.1	0.3	0.1	0.0833333	4	4															0.00242164	-0.0653844	-0.784613	-7.32305	-25.8922	-62.769	-124.23	0.00242164	0.00242164	0.00242164	0.00242164	0.00242164	0.00242164	0	0	0	0	0	0	0.00242164	0	0	0	0	0	0	Col mop
1	Col mop	T	0.28	0.3	0.15	0.1125	7	7															0.00963901	-0.0185893	-0.563869	-6.35818	-23.6549	-58.731	-117.863	0.00963901	0.00963901	0.00963901	0.00963901	0.00963901	0.00963901	0	0	0	0	0	0	0.00963901	0	0	0	0	0	0	Col mop
1	Col mop	T	0.2	0.3	0.1	0.1	7	7															0.00523389	-0.0512582	-0.731256	-7.11277	-25.4204	-61.9311	-122.922	0.00523389	0.00523389	0.00523389	0.00523389	0.00523389	0.00523389	0	0	0	0	0	0	0.00523389	0	0	0	0	0	0	Col mop
1	Col mop	T	0.3	0.2	0.1	0.075	1	1															0.00530144	0.00883573	0.0176715	0.0353429	0.0530144	0.0706858	0.0883573	0.00530144	0.00530144	0.00530144	0.00530144	0.00530144	0.00530144	0	0	0	0	0	0	0.00530144	0	0	0	0	0	0	Col mop
1	Col mop	T	0.4	0.32	0.34	0.165	1	1															0.0342119	0.0427649	0.0855299	0.17106	0.25659	0.342119	0.427649	0.0342119	0.0342119	0.0342119	0.0342119	0.0342119	0.0342119	0	0	0	0	0	0	0.0342119	0	0	0	0	0	0	Col mop
1	Col mop	T	0.2	0.32	0.14	0.115	1	1															0.00830951	0.0207738	0.0415476	0.0830951	0.124643	0.16619	0.207738	0.00830951	0.00830951	0.00830951	0.00830951	0.00830951	0.00830951	0	0	0	0	0	0	0.00830951	0	0	0	0	0	0	Col mop
1	Col mop	T	0.2	0.4	0.19	0.1475	6	7															0.0103026	-0.0596064	-0.821596	-7.59071	-26.5841	-64.0786	-126.351	0.0103026	0.0103026	0.0103026	0.0103026	0.0103026	0.0103026	0	0	0	0	0	0	0.0103026	0	0	0	0	0	0	Col mop
1	Col mop	T	0.24	0.26	0.15	0.1025	1	1															0.00792153	0.0165032	0.0330064	0.0660127	0.0990191	0.132025	0.165032	0.00792153	0.00792153	0.00792153	0.00792153	0.00792153	0.00792153	0	0	0	0	0	0	0.00792153	0	0	0	0	0	0	Col mop
1	Col mop	T	0.15	0.18	0.15	0.0825	1	1															0.00320737	0.0106912	0.0213825	0.0427649	0.0641474	0.0855299	0.106912	0.00320737	0.00320737	0.00320737	0.00320737	0.00320737	0.00320737	0	0	0	0	0	0	0.00320737	0	0	0	0	0	0	Col mop
1	Col mop	T	0.1	0.12	0.11	0.0575	1	1															0.00103869	0.00519345	0.0103869	0.0207738	0.0311607	0.0415476	0.0519345	0.00103869	0.00103869	0.00103869	0.00103869	0.00103869	0.00103869	0	0	0	0	0	0	0.00103869	0	0	0	0	0	0	Col mop
1	Col mop	T	0.23	0.3	0.27	0.1425	1	1															0.0146726	0.031897	0.063794	0.127588	0.191382	0.255176	0.31897	0.0146726	0.0146726	0.0146726	0.0146726	0.0146726	0.0146726	0	0	0	0	0	0	0.0146726	0	0	0	0	0	0	Col mop
1	Col mop	T	0.3	0.29	0.2	0.1225	1	1															0.0141431	0.0235718	0.0471435	0.094287	0.141431	0.188574	0.235718	0.0141431	0.0141431	0.0141431	0.0141431	0.0141431	0.0141431	0	0	0	0	0	0	0.0141431	0	0	0	0	0	0	Col mop
1	Col mop	T	0.15	0.17	0.2	0.0925	1	1															0.00403204	0.0134401	0.0268803	0.0537605	0.0806408	0.107521	0.134401	0.00403204	0.00403204	0.00403204	0.00403204	0.00403204	0.00403204	0	0	0	0	0	0	0.00403204	0	0	0	0	0	0	Col mop
1	Col mop	T	0.15	0.28	0.19	0.1175	1	1															0.00650604	0.0216868	0.0433736	0.0867472	0.130121	0.173494	0.216868	0.00650604	0.00650604	0.00650604	0.00650604	0.00650604	0.00650604	0	0	0	0	0	0	0.00650604	0	0	0	0	0	0	Col mop
1	Col mop	T	0.26	0.46	0.24	0.175	1	1															0.0250149	0.0481056	0.0962113	0.192423	0.288634	0.384845	0.481056	0.0250149	0.0250149	0.0250149	0.0250149	0.0250149	0.0250149	0	0	0	0	0	0	0.0250149	0	0	0	0	0	0	Col mop
1	Col mop	T	0.55	0.28	0.2	0.12	1	1															0.0248814	0.0226195	0.0452389	0.0904779	0.135717	0.180956	0.226195	0.0226195	0.0248814	0.0248814	0.0248814	0.0248814	0.0248814	0	0	0	0	0	0	0.0248814	0	0	0	0	0	0	Col mop
1	Col mop	T	0.11	0.21	0.13	0.085	1	1															0.00249678	0.011349	0.022698	0.045396	0.068094	0.090792	0.11349	0.00249678	0.00249678	0.00249678	0.00249678	0.00249678	0.00249678	0	0	0	0	0	0	0.00249678	0	0	0	0	0	0	Col mop
1	Col mop	T	0.16	0.04	0.05	0.0225	1	1															0.000254469	0.000795216	0.00159043	0.00318086	0.00477129	0.00636173	0.00795216	0.000254469	0.000254469	0.000254469	0.000254469	0.000254469	0.000254469	0	0	0	0	0	0	0.000254469	0	0	0	0	0	0	Col mop
1	Col mop	T	1.1	0.94	0.72	0.415	3	3															0.198191	0.166027	0.198042	0.306741	1.21952	3.8298	9.031	0.166027	0.198042	0.198191	0.198191	0.198191	0.198191	0	0	0	0	0	0	0.198191	0	0	0	0	0	0	Col mop
1	Col mop	T	0.13	0.43	0.4	0.2075	6	1															0.0175845	0.0676326	0.135265	0.27053	0.405796	0.541061	0.676326	0.0175845	0.0175845	0.0175845	0.0175845	0.0175845	0.0175845	0	0	0	0	0	0	0.0175845	0	0	0	0	0	0	Col mop
1	Col mop	T	0.15	0.25	0.1	0.0875	1	1															0.00360792	0.0120264	0.0240528	0.0481056	0.0721585	0.0962113	0.120264	0.00360792	0.00360792	0.00360792	0.00360792	0.00360792	0.00360792	0	0	0	0	0	0	0.00360792	0	0	0	0	0	0	Col mop
1	Col mop	T	0.2	0.21	0.13	0.085	1	1															0.0045396	0.011349	0.022698	0.045396	0.068094	0.090792	0.11349	0.0045396	0.0045396	0.0045396	0.0045396	0.0045396	0.0045396	0	0	0	0	0	0	0.0045396	0	0	0	0	0	0	Col mop
1	Col mop	T	0.4	0.65	0.4	0.2625	1	1															0.0865901	0.108238	0.216475	0.432951	0.649426	0.865901	1.08238	0.0865901	0.0865901	0.0865901	0.0865901	0.0865901	0.0865901	0	0	0	0	0	0	0.0865901	0	0	0	0	0	0	Col mop
1	Col mop	T	0.19	0.18	0.16	0.085	1	1															0.00431262	0.011349	0.022698	0.045396	0.068094	0.090792	0.11349	0.00431262	0.00431262	0.00431262	0.00431262	0.00431262	0.00431262	0	0	0	0	0	0	0.00431262	0	0	0	0	0	0	Col mop
1	Col mop	T	0.21	0.23	0.12	0.0875	1	1															0.00505109	0.0120264	0.0240528	0.0481056	0.0721585	0.0962113	0.120264	0.00505109	0.00505109	0.00505109	0.00505109	0.00505109	0.00505109	0	0	0	0	0	0	0.00505109	0	0	0	0	0	0	Col mop
1	Col mop	T	2.3	2.57	2.75	1.33	3	3			1												4.25623	2.21609	3.48768	4.24679	4.37622	5.97489	11.1417	2.21609	3.48768	4.24679	4.25623	4.25623	4.25623	0	5.5	0	0	0	0	4.50395	0	24.7717	0	0	0	0	Col mop
1	Col mop	T	1.14	0.95	1.02	0.4925	1	1															0.868695	0.381006	0.762013	1.52403	2.28604	3.04805	3.81006	0.381006	0.762013	0.868695	0.868695	0.868695	0.868695	0	0	0	0	0	0	0.868695	0	0	0	0	0	0	Col mop
1	Col mop	T	0.6	0.4	0.3	0.175	1	1															0.0577268	0.0481056	0.0962113	0.192423	0.288634	0.384845	0.481056	0.0481056	0.0577268	0.0577268	0.0577268	0.0577268	0.0577268	0	0	0	0	0	0	0.0577268	0	0	0	0	0	0	Col mop
1	Col mop	T	2.3	1.44	1.61	0.7625	7	7	1														3.73587	0.913271	1.82654	3.54874	2.20444	-8.31983	-34.301	0.913271	1.82654	3.54874	3.73587	3.73587	3.73587	5.5	0	0	0	0	0	3.9533	21.7432	0	0	0	0	0	Col mop
1	Col mop	T	1.29	2.05	1.55	0.9	1	1			1												3.28265	1.27235	2.54469	5.08938	7.63407	10.1788	12.7235	1.27235	2.54469	3.28265	3.28265	3.28265	3.28265	0	5.5	0	0	0	0	3.4737	0	19.1054	0	0	0	0	Col mop
1	Col mop	T	0.39	0.45	0.32	0.1925	1	1															0.0454021	0.0582078	0.116416	0.232831	0.349247	0.465663	0.582078	0.0454021	0.0454021	0.0454021	0.0454021	0.0454021	0.0454021	0	0	0	0	0	0	0.0454021	0	0	0	0	0	0	Col mop
1	Col mop	T	0.32	0.39	0.24	0.1575	1	1															0.024938	0.0389656	0.0779311	0.155862	0.233793	0.311725	0.389656	0.024938	0.024938	0.024938	0.024938	0.024938	0.024938	0	0	0	0	0	0	0.024938	0	0	0	0	0	0	Col mop
1	Col mop	T	0.29	0.22	0.08	0.075	1	1															0.00512472	0.00883573	0.0176715	0.0353429	0.0530144	0.0706858	0.0883573	0.00512472	0.00512472	0.00512472	0.00512472	0.00512472	0.00512472	0	0	0	0	0	0	0.00512472	0	0	0	0	0	0	Col mop
1	Col mop	T	0.25	0.03	0.15	0.045	1	1															0.00159043	0.00318086	0.00636173	0.0127235	0.0190852	0.0254469	0.0318086	0.00159043	0.00159043	0.00159043	0.00159043	0.00159043	0.00159043	0	0	0	0	0	0	0.00159043	0	0	0	0	0	0	Col mop
1	Col mop	T	0.48	0.5	0.3	0.2	1	1															0.0603186	0.0628319	0.125664	0.251327	0.376991	0.502655	0.628319	0.0603186	0.0603186	0.0603186	0.0603186	0.0603186	0.0603186	0	0	0	0	0	0	0.0603186	0	0	0	0	0	0	Col mop
1	Col mop	T	0.51	0.34	0.32	0.165	1	1															0.0436202	0.0427649	0.0855299	0.17106	0.25659	0.342119	0.427649	0.0427649	0.0436202	0.0436202	0.0436202	0.0436202	0.0436202	0	0	0	0	0	0	0.0436202	0	0	0	0	0	0	Col mop
1	Gre bic	T	1	1.2	1.58	0.695	1	1	6														1.51747	0.758734	1.51747	3.03494	4.5524	6.06987	7.58734	0.758734	1.51747	1.51747	1.51747	1.51747	1.51747	95	0	0	0	0	0	30.3494	2883.19	0	0	0	0	0	Gre bic
1	Gre fla	T	2.1	3.3	3.8	1.775	1	1			1												20.7858	4.94899	9.89798	19.796	29.6939	39.5919	49.4899	4.94899	9.89798	19.796	20.7858	20.7858	20.7858	0	5.5	0	0	0	0	21.9955	0	120.975	0	0	0	0	Gre fla
1	Ere amo	T	1.15	1.08	1.2	0.57	1	1			1												1.17381	0.510352	1.0207	2.04141	3.06211	4.08281	5.10352	0.510352	1.0207	1.17381	1.17381	1.17381	1.17381	0	5.5	0	0	0	0	1.24213	0	6.83169	0	0	0	0	Ere amo
1	Gre fla	T	2.2	3.7	4	1.925	1	1			1												25.6114	5.82078	11.6416	23.2831	34.9247	46.5663	58.2078	5.82078	11.6416	23.2831	25.6114	25.6114	25.6114	0	5.5	0	0	0	0	27.1021	0	149.061	0	0	0	0	Gre fla
1	Gre bic	T	0.8	1	0.6	0.4	1	1	6														0.402124	0.251327	0.502655	1.00531	1.50796	2.01062	2.51327	0.251327	0.402124	0.402124	0.402124	0.402124	0.402124	95	0	0	0	0	0	8.04248	764.035	0	0	0	0	0	Gre bic
2	Dic cin	T	1.4	1.25	1.05	0.575	1	1			1												1.45416	0.519345	1.03869	2.07738	3.11607	4.15476	5.19345	0.519345	1.03869	1.45416	1.45416	1.45416	1.45416	0	5.5	0	0	0	0	1.5388	0	8.46339	0	0	0	0	Dic cin
2	Col mop	T	0.88	0.9	0.55	0.3625	1	1															0.363286	0.206412	0.412825	0.82565	1.23847	1.6513	2.06412	0.206412	0.363286	0.363286	0.363286	0.363286	0.363286	0	0	0	0	0	0	0.363286	0	0	0	0	0	0	Col mop
2	Cis cor	T	1.1	1.8	2.9	1.175	1	1			1												4.7711	2.16868	4.33736	8.67472	13.0121	17.3494	21.6868	2.16868	4.33736	4.7711	4.7711	4.7711	4.7711	0	5.5	0	0	0	0	5.04878	0	27.7683	0	0	0	0	Cis cor
2	Col mop	C	1.3	7.4	2.4	2.45	1	1															24.5146	9.4287	18.8574	37.7148	56.5722	75.4296	94.287	9.4287	18.8574	24.5146	24.5146	24.5146	24.5146	0	0	0	0	0	0	24.5146	0	0	0	0	0	0	Col mop
2	Dal mel	T	2.7	2.8	3.3	1.525	1	1															19.7266	3.65308	7.30617	14.6123	21.9185	29.2247	36.5308	3.65308	7.30617	14.6123	19.7266	19.7266	19.7266	0	0	0	0	0	0	19.7266	0	0	0	0	0	0	Dal mel
2	Cis cor	T	2.15	3.3	2.5	1.45	1	1															14.2012	3.3026	6.6052	13.2104	19.8156	26.4208	33.026	3.3026	6.6052	13.2104	14.2012	14.2012	14.2012	0	0	0	0	0	0	14.2012	0	0	0	0	0	0	Cis cor
2	Dal mel	T	1.75	1.4	0.55	0.4875	1	1	2		2												1.30658	0.37331	0.746619	1.49324	2.23986	2.98648	3.7331	0.37331	0.746619	1.30658	1.30658	1.30658	1.30658	18	18	0	0	0	0	2.04154	36.7477	36.7477	0	0	0	0	Dal mel
2	Dal mel	T	1.5	1.6	1.4	0.75	1	1			1												2.65072	0.883573	1.76715	3.53429	5.30144	7.06858	8.83573	0.883573	1.76715	2.65072	2.65072	2.65072	2.65072	0	5.5	0	0	0	0	2.80499	0	15.4275	0	0	0	0	Dal mel
2	Dal mel	T	0.84	0.68	0.5	0.295	1	1															0.229654	0.136699	0.273397	0.546794	0.820191	1.09359	1.36699	0.136699	0.229654	0.229654	0.229654	0.229654	0.229654	0	0	0	0	0	0	0.229654	0	0	0	0	0	0	Dal mel
2	Com afr	T	1.7	1.17	0.73	0.475	1	1															1.205	0.354411	0.708822	1.41764	2.12647	2.83529	3.54411	0.354411	0.708822	1.205	1.205	1.205	1.205	0	0	0	0	0	0	1.205	0	0	0	0	0	0	Com afr
2	Cis cor	T	1.3	0.9	0.68	0.395	1	1															0.637217	0.245083	0.490167	0.980334	1.4705	1.96067	2.45083	0.245083	0.490167	0.637217	0.637217	0.637217	0.637217	0	0	0	0	0	0	0.637217	0	0	0	0	0	0	Cis cor
2	Mae par	T	0.2	0.6	0.5	0.275	1	1															0.0475166	0.118791	0.237583	0.475166	0.712749	0.950332	1.18791	0.0475166	0.0475166	0.0475166	0.0475166	0.0475166	0.0475166	0	0	0	0	0	0	0.0475166	0	0	0	0	0	0	Mae par
2	Mae par	T	0.15	0.6	0.2	0.2	1	1															0.0188496	0.0628319	0.125664	0.251327	0.376991	0.502655	0.628319	0.0188496	0.0188496	0.0188496	0.0188496	0.0188496	0.0188496	0	0	0	0	0	0	0.0188496	0	0	0	0	0	0	Mae par
2	Com afr	T	1.95	1.3	1.05	0.5875	1	1															2.11446	0.54217	1.08434	2.16868	3.25302	4.33736	5.4217	0.54217	1.08434	2.11446	2.11446	2.11446	2.11446	0	0	0	0	0	0	2.11446	0	0	0	0	0	0	Com afr
2	Dic cin	T	1.74	1.2	0.5	0.425	1	1															0.987363	0.283725	0.56745	1.1349	1.70235	2.2698	2.83725	0.283725	0.56745	0.987363	0.987363	0.987363	0.987363	0	0	0	0	0	0	0.987363	0	0	0	0	0	0	Dic cin
2	Sec vir	T	2.5	1.95	2.7	1.1625	3	3															3.53444	1.7248	2.771	3.50616	3.56271	4.29787	7.06887	1.7248	2.771	3.50616	3.53444	3.53444	3.53444	0	0	0	0	0	0	3.53444	0	0	0	0	0	0	Sec vir
2	Col mop	C	2.2	7.3	2.4	2.425	1	1															40.644	9.23726	18.4745	36.9491	55.4236	73.8981	92.3726	9.23726	18.4745	36.9491	40.644	40.644	40.644	0	0	0	0	0	0	40.644	0	0	0	0	0	0	Col mop
2	Dic cin	T	2.25	1.6	1.05	0.6625	1	1															3.10245	0.689432	1.37886	2.75773	4.13659	5.51546	6.89432	0.689432	1.37886	2.75773	3.10245	3.10245	3.10245	0	0	0	0	0	0	3.10245	0	0	0	0	0	0	Dic cin
2	Col mop	T	1.85	1.1	0.86	0.49	1	1															1.39545	0.377148	0.754296	1.50859	2.26289	3.01719	3.77148	0.377148	0.754296	1.39545	1.39545	1.39545	1.39545	0	0	0	0	0	0	1.39545	0	0	0	0	0	0	Col mop
2	Col mop	T	1.05	0.65	0.6	0.3125	1	1															0.322136	0.153398	0.306796	0.613592	0.920388	1.22718	1.53398	0.153398	0.306796	0.322136	0.322136	0.322136	0.322136	0	0	0	0	0	0	0.322136	0	0	0	0	0	0	Col mop
2	Pte bre	T	1.27	1.1	0.6	0.425	1	1															0.720662	0.283725	0.56745	1.1349	1.70235	2.2698	2.83725	0.283725	0.56745	0.720662	0.720662	0.720662	0.720662	0	0	0	0	0	0	0.720662	0	0	0	0	0	0	Pte bre
2	Dal mel	T	0.6	0.6	0.45	0.2625	1	1			3												0.129885	0.108238	0.216475	0.432951	0.649426	0.865901	1.08238	0.108238	0.129885	0.129885	0.129885	0.129885	0.129885	0	38	0	0	0	0	0.209492	0	7.96071	0	0	0	0	Dal mel
2	Col mop	T	0.21	0.35	0.2	0.1375	1	1															0.0124731	0.0296979	0.0593957	0.118791	0.178187	0.237583	0.296979	0.0124731	0.0124731	0.0124731	0.0124731	0.0124731	0.0124731	0	0	0	0	0	0	0.0124731	0	0	0	0	0	0	Col mop
2	Col mop	T	1.75	1.05	0.8	0.4625	1	1			1												1.17601	0.336003	0.672006	1.34401	2.01602	2.68803	3.36003	0.336003	0.672006	1.17601	1.17601	1.17601	1.17601	0	5.5	0	0	0	0	1.24446	0	6.84451	0	0	0	0	Col mop
2	Dal mel	T	0.8	1.4	0.5	0.475	1	1															0.567057	0.354411	0.708822	1.41764	2.12647	2.83529	3.54411	0.354411	0.567057	0.567057	0.567057	0.567057	0.567057	0	0	0	0	0	0	0.567057	0	0	0	0	0	0	Dal mel
						#DIV/0!		#DIV/0!															#DIV/0!	#DIV/0!	#DIV/0!	#DIV/0!	#DIV/0!	#DIV/0!	#DIV/0!	#DIV/0!	#DIV/0!	#DIV/0!	#DIV/0!	#DIV/0!	#DIV/0!	0	0	0	0	0	0	#DIV/0!	#DIV/0!	#DIV/0!	#DIV/0!	#DIV/0!	#DIV/0!	#DIV/0!	0
						#DIV/0!		#DIV/0!															#DIV/0!	#DIV/0!	#DIV/0!	#DIV/0!	#DIV/0!	#DIV/0!	#DIV/0!	#DIV/0!	#DIV/0!	#DIV/0!	#DIV/0!	#DIV/0!	#DIV/0!	0	0	0	0	0	0	#DIV/0!	#DIV/0!	#DIV/0!	#DIV/0!	#DIV/0!	#DIV/0!	#DIV/0!	0
						#DIV/0!		#DIV/0!															#DIV/0!	#DIV/0!	#DIV/0!	#DIV/0!	#DIV/0!	#DIV/0!	#DIV/0!	#DIV/0!	#DIV/0!	#DIV/0!	#DIV/0!	#DIV/0!	#DIV/0!	0	0	0	0	0	0	#DIV/0!	#DIV/0!	#DIV/0!	#DIV/0!	#DIV/0!	#DIV/0!	#DIV/0!	0
						#DIV/0!		#DIV/0!															#DIV/0!	#DIV/0!	#DIV/0!	#DIV/0!	#DIV/0!	#DIV/0!	#DIV/0!	#DIV/0!	#DIV/0!	#DIV/0!	#DIV/0!	#DIV/0!	#DIV/0!	0	0	0	0	0	0	#DIV/0!	#DIV/0!	#DIV/0!	#DIV/0!	#DIV/0!	#DIV/0!	#DIV/0!	0
						#DIV/0!		#DIV/0!															#DIV/0!	#DIV/0!	#DIV/0!	#DIV/0!	#DIV/0!	#DIV/0!	#DIV/0!	#DIV/0!	#DIV/0!	#DIV/0!	#DIV/0!	#DIV/0!	#DIV/0!	0	0	0	0	0	0	#DIV/0!	#DIV/0!	#DIV/0!	#DIV/0!	#DIV/0!	#DIV/0!	#DIV/0!	0
						#DIV/0!		#DIV/0!															#DIV/0!	#DIV/0!	#DIV/0!	#DIV/0!	#DIV/0!	#DIV/0!	#DIV/0!	#DIV/0!	#DIV/0!	#DIV/0!	#DIV/0!	#DIV/0!	#DIV/0!	0	0	0	0	0	0	#DIV/0!	#DIV/0!	#DIV/0!	#DIV/0!	#DIV/0!	#DIV/0!	#DIV/0!	0
						#DIV/0!		#DIV/0!															#DIV/0!	#DIV/0!	#DIV/0!	#DIV/0!	#DIV/0!	#DIV/0!	#DIV/0!	#DIV/0!	#DIV/0!	#DIV/0!	#DIV/0!	#DIV/0!	#DIV/0!	0	0	0	0	0	0	#DIV/0!	#DIV/0!	#DIV/0!	#DIV/0!	#DIV/0!	#DIV/0!	#DIV/0!	0
						#DIV/0!		#DIV/0!															#DIV/0!	#DIV/0!	#DIV/0!	#DIV/0!	#DIV/0!	#DIV/0!	#DIV/0!	#DIV/0!	#DIV/0!	#DIV/0!	#DIV/0!	#DIV/0!	#DIV/0!	0	0	0	0	0	0	#DIV/0!	#DIV/0!	#DIV/0!	#DIV/0!	#DIV/0!	#DIV/0!	#DIV/0!	0
						#DIV/0!		#DIV/0!															#DIV/0!	#DIV/0!	#DIV/0!	#DIV/0!	#DIV/0!	#DIV/0!	#DIV/0!	#DIV/0!	#DIV/0!	#DIV/0!	#DIV/0!	#DIV/0!	#DIV/0!	0	0	0	0	0	0	#DIV/0!	#DIV/0!	#DIV/0!	#DIV/0!	#DIV/0!	#DIV/0!	#DIV/0!	0
						#DIV/0!		#DIV/0!															#DIV/0!	#DIV/0!	#DIV/0!	#DIV/0!	#DIV/0!	#DIV/0!	#DIV/0!	#DIV/0!	#DIV/0!	#DIV/0!	#DIV/0!	#DIV/0!	#DIV/0!	0	0	0	0	0	0	#DIV/0!	#DIV/0!	#DIV/0!	#DIV/0!	#DIV/0!	#DIV/0!	#DIV/0!	0
						#DIV/0!		#DIV/0!															#DIV/0!	#DIV/0!	#DIV/0!	#DIV/0!	#DIV/0!	#DIV/0!	#DIV/0!	#DIV/0!	#DIV/0!	#DIV/0!	#DIV/0!	#DIV/0!	#DIV/0!	0	0	0	0	0	0	#DIV/0!	#DIV/0!	#DIV/0!	#DIV/0!	#DIV/0!	#DIV/0!	#DIV/0!	0
						#DIV/0!		#DIV/0!															#DIV/0!	#DIV/0!	#DIV/0!	#DIV/0!	#DIV/0!	#DIV/0!	#DIV/0!	#DIV/0!	#DIV/0!	#DIV/0!	#DIV/0!	#DIV/0!	#DIV/0!	0	0	0	0	0	0	#DIV/0!	#DIV/0!	#DIV/0!	#DIV/0!	#DIV/0!	#DIV/0!	#DIV/0!	0
						#DIV/0!		#DIV/0!															#DIV/0!	#DIV/0!	#DIV/0!	#DIV/0!	#DIV/0!	#DIV/0!	#DIV/0!	#DIV/0!	#DIV/0!	#DIV/0!	#DIV/0!	#DIV/0!	#DIV/0!	0	0	0	0	0	0	#DIV/0!	#DIV/0!	#DIV/0!	#DIV/0!	#DIV/0!	#DIV/0!	#DIV/0!	0
						#DIV/0!		#DIV/0!															#DIV/0!	#DIV/0!	#DIV/0!	#DIV/0!	#DIV/0!	#DIV/0!	#DIV/0!	#DIV/0!	#DIV/0!	#DIV/0!	#DIV/0!	#DIV/0!	#DIV/0!	0	0	0	0	0	0	#DIV/0!	#DIV/0!	#DIV/0!	#DIV/0!	#DIV/0!	#DIV/0!	#DIV/0!	0
						#DIV/0!		#DIV/0!															#DIV/0!	#DIV/0!	#DIV/0!	#DIV/0!	#DIV/0!	#DIV/0!	#DIV/0!	#DIV/0!	#DIV/0!	#DIV/0!	#DIV/0!	#DIV/0!	#DIV/0!	0	0	0	0	0	0	#DIV/0!	#DIV/0!	#DIV/0!	#DIV/0!	#DIV/0!	#DIV/0!	#DIV/0!	0
						#DIV/0!		#DIV/0!															#DIV/0!	#DIV/0!	#DIV/0!	#DIV/0!	#DIV/0!	#DIV/0!	#DIV/0!	#DIV/0!	#DIV/0!	#DIV/0!	#DIV/0!	#DIV/0!	#DIV/0!	0	0	0	0	0	0	#DIV/0!	#DIV/0!	#DIV/0!	#DIV/0!	#DIV/0!	#DIV/0!	#DIV/0!	0
						#DIV/0!		#DIV/0!															#DIV/0!	#DIV/0!	#DIV/0!	#DIV/0!	#DIV/0!	#DIV/0!	#DIV/0!	#DIV/0!	#DIV/0!	#DIV/0!	#DIV/0!	#DIV/0!	#DIV/0!	0	0	0	0	0	0	#DIV/0!	#DIV/0!	#DIV/0!	#DIV/0!	#DIV/0!	#DIV/0!	#DIV/0!	0
						#DIV/0!		#DIV/0!															#DIV/0!	#DIV/0!	#DIV/0!	#DIV/0!	#DIV/0!	#DIV/0!	#DIV/0!	#DIV/0!	#DIV/0!	#DIV/0!	#DIV/0!	#DIV/0!	#DIV/0!	0	0	0	0	0	0	#DIV/0!	#DIV/0!	#DIV/0!	#DIV/0!	#DIV/0!	#DIV/0!	#DIV/0!	0
						#DIV/0!		#DIV/0!															#DIV/0!	#DIV/0!	#DIV/0!	#DIV/0!	#DIV/0!	#DIV/0!	#DIV/0!	#DIV/0!	#DIV/0!	#DIV/0!	#DIV/0!	#DIV/0!	#DIV/0!	0	0	0	0	0	0	#DIV/0!	#DIV/0!	#DIV/0!	#DIV/0!	#DIV/0!	#DIV/0!	#DIV/0!	0
						#DIV/0!		#DIV/0!															#DIV/0!	#DIV/0!	#DIV/0!	#DIV/0!	#DIV/0!	#DIV/0!	#DIV/0!	#DIV/0!	#DIV/0!	#DIV/0!	#DIV/0!	#DIV/0!	#DIV/0!	0	0	0	0	0	0	#DIV/0!	#DIV/0!	#DIV/0!	#DIV/0!	#DIV/0!	#DIV/0!	#DIV/0!	0
						#DIV/0!		#DIV/0!															#DIV/0!	#DIV/0!	#DIV/0!	#DIV/0!	#DIV/0!	#DIV/0!	#DIV/0!	#DIV/0!	#DIV/0!	#DIV/0!	#DIV/0!	#DIV/0!	#DIV/0!	0	0	0	0	0	0	#DIV/0!	#DIV/0!	#DIV/0!	#DIV/0!	#DIV/0!	#DIV/0!	#DIV/0!	0
						#DIV/0!		#DIV/0!															#DIV/0!	#DIV/0!	#DIV/0!	#DIV/0!	#DIV/0!	#DIV/0!	#DIV/0!	#DIV/0!	#DIV/0!	#DIV/0!	#DIV/0!	#DIV/0!	#DIV/0!	0	0	0	0	0	0	#DIV/0!	#DIV/0!	#DIV/0!	#DIV/0!	#DIV/0!	#DIV/0!	#DIV/0!	0
						#DIV/0!		#DIV/0!															#DIV/0!	#DIV/0!	#DIV/0!	#DIV/0!	#DIV/0!	#DIV/0!	#DIV/0!	#DIV/0!	#DIV/0!	#DIV/0!	#DIV/0!	#DIV/0!	#DIV/0!	0	0	0	0	0	0	#DIV/0!	#DIV/0!	#DIV/0!	#DIV/0!	#DIV/0!	#DIV/0!	#DIV/0!	0
						#DIV/0!		#DIV/0!															#DIV/0!	#DIV/0!	#DIV/0!	#DIV/0!	#DIV/0!	#DIV/0!	#DIV/0!	#DIV/0!	#DIV/0!	#DIV/0!	#DIV/0!	#DIV/0!	#DIV/0!	0	0	0	0	0	0	#DIV/0!	#DIV/0!	#DIV/0!	#DIV/0!	#DIV/0!	#DIV/0!	#DIV/0!	0
						#DIV/0!		#DIV/0!															#DIV/0!	#DIV/0!	#DIV/0!	#DIV/0!	#DIV/0!	#DIV/0!	#DIV/0!	#DIV/0!	#DIV/0!	#DIV/0!	#DIV/0!	#DIV/0!	#DIV/0!	0	0	0	0	0	0	#DIV/0!	#DIV/0!	#DIV/0!	#DIV/0!	#DIV/0!	#DIV/0!	#DIV/0!	0
						#DIV/0!		#DIV/0!															#DIV/0!	#DIV/0!	#DIV/0!	#DIV/0!	#DIV/0!	#DIV/0!	#DIV/0!	#DIV/0!	#DIV/0!	#DIV/0!	#DIV/0!	#DIV/0!	#DIV/0!	0	0	0	0	0	0	#DIV/0!	#DIV/0!	#DIV/0!	#DIV/0!	#DIV/0!	#DIV/0!	#DIV/0!	0
						#DIV/0!		#DIV/0!															#DIV/0!	#DIV/0!	#DIV/0!	#DIV/0!	#DIV/0!	#DIV/0!	#DIV/0!	#DIV/0!	#DIV/0!	#DIV/0!	#DIV/0!	#DIV/0!	#DIV/0!	0	0	0	0	0	0	#DIV/0!	#DIV/0!	#DIV/0!	#DIV/0!	#DIV/0!	#DIV/0!	#DIV/0!	0
						#DIV/0!		#DIV/0!															#DIV/0!	#DIV/0!	#DIV/0!	#DIV/0!	#DIV/0!	#DIV/0!	#DIV/0!	#DIV/0!	#DIV/0!	#DIV/0!	#DIV/0!	#DIV/0!	#DIV/0!	0	0	0	0	0	0	#DIV/0!	#DIV/0!	#DIV/0!	#DIV/0!	#DIV/0!	#DIV/0!	#DIV/0!	0
						#DIV/0!		#DIV/0!															#DIV/0!	#DIV/0!	#DIV/0!	#DIV/0!	#DIV/0!	#DIV/0!	#DIV/0!	#DIV/0!	#DIV/0!	#DIV/0!	#DIV/0!	#DIV/0!	#DIV/0!	0	0	0	0	0	0	#DIV/0!	#DIV/0!	#DIV/0!	#DIV/0!	#DIV/0!	#DIV/0!	#DIV/0!	0
						#DIV/0!		#DIV/0!															#DIV/0!	#DIV/0!	#DIV/0!	#DIV/0!	#DIV/0!	#DIV/0!	#DIV/0!	#DIV/0!	#DIV/0!	#DIV/0!	#DIV/0!	#DIV/0!	#DIV/0!	0	0	0	0	0	0	#DIV/0!	#DIV/0!	#DIV/0!	#DIV/0!	#DIV/0!	#DIV/0!	#DIV/0!	0
						#DIV/0!		#DIV/0!															#DIV/0!	#DIV/0!	#DIV/0!	#DIV/0!	#DIV/0!	#DIV/0!	#DIV/0!	#DIV/0!	#DIV/0!	#DIV/0!	#DIV/0!	#DIV/0!	#DIV/0!	0	0	0	0	0	0	#DIV/0!	#DIV/0!	#DIV/0!	#DIV/0!	#DIV/0!	#DIV/0!	#DIV/0!	0
						#DIV/0!		#DIV/0!															#DIV/0!	#DIV/0!	#DIV/0!	#DIV/0!	#DIV/0!	#DIV/0!	#DIV/0!	#DIV/0!	#DIV/0!	#DIV/0!	#DIV/0!	#DIV/0!	#DIV/0!	0	0	0	0	0	0	#DIV/0!	#DIV/0!	#DIV/0!	#DIV/0!	#DIV/0!	#DIV/0!	#DIV/0!	0
						#DIV/0!		#DIV/0!															#DIV/0!	#DIV/0!	#DIV/0!	#DIV/0!	#DIV/0!	#DIV/0!	#DIV/0!	#DIV/0!	#DIV/0!	#DIV/0!	#DIV/0!	#DIV/0!	#DIV/0!	0	0	0	0	0	0	#DIV/0!	#DIV/0!	#DIV/0!	#DIV/0!	#DIV/0!	#DIV/0!	#DIV/0!	0
						#DIV/0!		#DIV/0!															#DIV/0!	#DIV/0!	#DIV/0!	#DIV/0!	#DIV/0!	#DIV/0!	#DIV/0!	#DIV/0!	#DIV/0!	#DIV/0!	#DIV/0!	#DIV/0!	#DIV/0!	0	0	0	0	0	0	#DIV/0!	#DIV/0!	#DIV/0!	#DIV/0!	#DIV/0!	#DIV/0!	#DIV/0!	0
						#DIV/0!		#DIV/0!															#DIV/0!	#DIV/0!	#DIV/0!	#DIV/0!	#DIV/0!	#DIV/0!	#DIV/0!	#DIV/0!	#DIV/0!	#DIV/0!	#DIV/0!	#DIV/0!	#DIV/0!	0	0	0	0	0	0	#DIV/0!	#DIV/0!	#DIV/0!	#DIV/0!	#DIV/0!	#DIV/0!	#DIV/0!	0
						#DIV/0!		#DIV/0!															#DIV/0!	#DIV/0!	#DIV/0!	#DIV/0!	#DIV/0!	#DIV/0!	#DIV/0!	#DIV/0!	#DIV/0!	#DIV/0!	#DIV/0!	#DIV/0!	#DIV/0!	0	0	0	0	0	0	#DIV/0!	#DIV/0!	#DIV/0!	#DIV/0!	#DIV/0!	#DIV/0!	#DIV/0!	0
						#DIV/0!		#DIV/0!															#DIV/0!	#DIV/0!	#DIV/0!	#DIV/0!	#DIV/0!	#DIV/0!	#DIV/0!	#DIV/0!	#DIV/0!	#DIV/0!	#DIV/0!	#DIV/0!	#DIV/0!	0	0	0	0	0	0	#DIV/0!	#DIV/0!	#DIV/0!	#DIV/0!	#DIV/0!	#DIV/0!	#DIV/0!	0
						#DIV/0!		#DIV/0!															#DIV/0!	#DIV/0!	#DIV/0!	#DIV/0!	#DIV/0!	#DIV/0!	#DIV/0!	#DIV/0!	#DIV/0!	#DIV/0!	#DIV/0!	#DIV/0!	#DIV/0!	0	0	0	0	0	0	#DIV/0!	#DIV/0!	#DIV/0!	#DIV/0!	#DIV/0!	#DIV/0!	#DIV/0!	0
						#DIV/0!		#DIV/0!															#DIV/0!	#DIV/0!	#DIV/0!	#DIV/0!	#DIV/0!	#DIV/0!	#DIV/0!	#DIV/0!	#DIV/0!	#DIV/0!	#DIV/0!	#DIV/0!	#DIV/0!	0	0	0	0	0	0	#DIV/0!	#DIV/0!	#DIV/0!	#DIV/0!	#DIV/0!	#DIV/0!	#DIV/0!	0
						#DIV/0!		#DIV/0!															#DIV/0!	#DIV/0!	#DIV/0!	#DIV/0!	#DIV/0!	#DIV/0!	#DIV/0!	#DIV/0!	#DIV/0!	#DIV/0!	#DIV/0!	#DIV/0!	#DIV/0!	0	0	0	0	0	0	#DIV/0!	#DIV/0!	#DIV/0!	#DIV/0!	#DIV/0!	#DIV/0!	#DIV/0!	0
						#DIV/0!		#DIV/0!															#DIV/0!	#DIV/0!	#DIV/0!	#DIV/0!	#DIV/0!	#DIV/0!	#DIV/0!	#DIV/0!	#DIV/0!	#DIV/0!	#DIV/0!	#DIV/0!	#DIV/0!	0	0	0	0	0	0	#DIV/0!	#DIV/0!	#DIV/0!	#DIV/0!	#DIV/0!	#DIV/0!	#DIV/0!	0
						#DIV/0!		#DIV/0!															#DIV/0!	#DIV/0!	#DIV/0!	#DIV/0!	#DIV/0!	#DIV/0!	#DIV/0!	#DIV/0!	#DIV/0!	#DIV/0!	#DIV/0!	#DIV/0!	#DIV/0!	0	0	0	0	0	0	#DIV/0!	#DIV/0!	#DIV/0!	#DIV/0!	#DIV/0!	#DIV/0!	#DIV/0!	0
						#DIV/0!		#DIV/0!															#DIV/0!	#DIV/0!	#DIV/0!	#DIV/0!	#DIV/0!	#DIV/0!	#DIV/0!	#DIV/0!	#DIV/0!	#DIV/0!	#DIV/0!	#DIV/0!	#DIV/0!	0	0	0	0	0	0	#DIV/0!	#DIV/0!	#DIV/0!	#DIV/0!	#DIV/0!	#DIV/0!	#DIV/0!	0
						#DIV/0!		#DIV/0!															#DIV/0!	#DIV/0!	#DIV/0!	#DIV/0!	#DIV/0!	#DIV/0!	#DIV/0!	#DIV/0!	#DIV/0!	#DIV/0!	#DIV/0!	#DIV/0!	#DIV/0!	0	0	0	0	0	0	#DIV/0!	#DIV/0!	#DIV/0!	#DIV/0!	#DIV/0!	#DIV/0!	#DIV/0!	0
						#DIV/0!		#DIV/0!															#DIV/0!	#DIV/0!	#DIV/0!	#DIV/0!	#DIV/0!	#DIV/0!	#DIV/0!	#DIV/0!	#DIV/0!	#DIV/0!	#DIV/0!	#DIV/0!	#DIV/0!	0	0	0	0	0	0	#DIV/0!	#DIV/0!	#DIV/0!	#DIV/0!	#DIV/0!	#DIV/0!	#DIV/0!	0
						#DIV/0!		#DIV/0!															#DIV/0!	#DIV/0!	#DIV/0!	#DIV/0!	#DIV/0!	#DIV/0!	#DIV/0!	#DIV/0!	#DIV/0!	#DIV/0!	#DIV/0!	#DIV/0!	#DIV/0!	0	0	0	0	0	0	#DIV/0!	#DIV/0!	#DIV/0!	#DIV/0!	#DIV/0!	#DIV/0!	#DIV/0!	0
						#DIV/0!		#DIV/0!															#DIV/0!	#DIV/0!	#DIV/0!	#DIV/0!	#DIV/0!	#DIV/0!	#DIV/0!	#DIV/0!	#DIV/0!	#DIV/0!	#DIV/0!	#DIV/0!	#DIV/0!	0	0	0	0	0	0	#DIV/0!	#DIV/0!	#DIV/0!	#DIV/0!	#DIV/0!	#DIV/0!	#DIV/0!	0
						#DIV/0!		#DIV/0!															#DIV/0!	#DIV/0!	#DIV/0!	#DIV/0!	#DIV/0!	#DIV/0!	#DIV/0!	#DIV/0!	#DIV/0!	#DIV/0!	#DIV/0!	#DIV/0!	#DIV/0!	0	0	0	0	0	0	#DIV/0!	#DIV/0!	#DIV/0!	#DIV/0!	#DIV/0!	#DIV/0!	#DIV/0!	0
						#DIV/0!		#DIV/0!															#DIV/0!	#DIV/0!	#DIV/0!	#DIV/0!	#DIV/0!	#DIV/0!	#DIV/0!	#DIV/0!	#DIV/0!	#DIV/0!	#DIV/0!	#DIV/0!	#DIV/0!	0	0	0	0	0	0	#DIV/0!	#DIV/0!	#DIV/0!	#DIV/0!	#DIV/0!	#DIV/0!	#DIV/0!	0
						#DIV/0!		#DIV/0!															#DIV/0!	#DIV/0!	#DIV/0!	#DIV/0!	#DIV/0!	#DIV/0!	#DIV/0!	#DIV/0!	#DIV/0!	#DIV/0!	#DIV/0!	#DIV/0!	#DIV/0!	0	0	0	0	0	0	#DIV/0!	#DIV/0!	#DIV/0!	#DIV/0!	#DIV/0!	#DIV/0!	#DIV/0!	0
						#DIV/0!		#DIV/0!															#DIV/0!	#DIV/0!	#DIV/0!	#DIV/0!	#DIV/0!	#DIV/0!	#DIV/0!	#DIV/0!	#DIV/0!	#DIV/0!	#DIV/0!	#DIV/0!	#DIV/0!	0	0	0	0	0	0	#DIV/0!	#DIV/0!	#DIV/0!	#DIV/0!	#DIV/0!	#DIV/0!	#DIV/0!	0
						#DIV/0!		#DIV/0!															#DIV/0!	#DIV/0!	#DIV/0!	#DIV/0!	#DIV/0!	#DIV/0!	#DIV/0!	#DIV/0!	#DIV/0!	#DIV/0!	#DIV/0!	#DIV/0!	#DIV/0!	0	0	0	0	0	0	#DIV/0!	#DIV/0!	#DIV/0!	#DIV/0!	#DIV/0!	#DIV/0!	#DIV/0!	0
						#DIV/0!		#DIV/0!															#DIV/0!	#DIV/0!	#DIV/0!	#DIV/0!	#DIV/0!	#DIV/0!	#DIV/0!	#DIV/0!	#DIV/0!	#DIV/0!	#DIV/0!	#DIV/0!	#DIV/0!	0	0	0	0	0	0	#DIV/0!	#DIV/0!	#DIV/0!	#DIV/0!	#DIV/0!	#DIV/0!	#DIV/0!	0
						#DIV/0!		#DIV/0!															#DIV/0!	#DIV/0!	#DIV/0!	#DIV/0!	#DIV/0!	#DIV/0!	#DIV/0!	#DIV/0!	#DIV/0!	#DIV/0!	#DIV/0!	#DIV/0!	#DIV/0!	0	0	0	0	0	0	#DIV/0!	#DIV/0!	#DIV/0!	#DIV/0!	#DIV/0!	#DIV/0!	#DIV/0!	0
						#DIV/0!		#DIV/0!															#DIV/0!	#DIV/0!	#DIV/0!	#DIV/0!	#DIV/0!	#DIV/0!	#DIV/0!	#DIV/0!	#DIV/0!	#DIV/0!	#DIV/0!	#DIV/0!	#DIV/0!	0	0	0	0	0	0	#DIV/0!	#DIV/0!	#DIV/0!	#DIV/0!	#DIV/0!	#DIV/0!	#DIV/0!	0
						#DIV/0!		#DIV/0!															#DIV/0!	#DIV/0!	#DIV/0!	#DIV/0!	#DIV/0!	#DIV/0!	#DIV/0!	#DIV/0!	#DIV/0!	#DIV/0!	#DIV/0!	#DIV/0!	#DIV/0!	0	0	0	0	0	0	#DIV/0!	#DIV/0!	#DIV/0!	#DIV/0!	#DIV/0!	#DIV/0!	#DIV/0!	0
						#DIV/0!		#DIV/0!															#DIV/0!	#DIV/0!	#DIV/0!	#DIV/0!	#DIV/0!	#DIV/0!	#DIV/0!	#DIV/0!	#DIV/0!	#DIV/0!	#DIV/0!	#DIV/0!	#DIV/0!	0	0	0	0	0	0	#DIV/0!	#DIV/0!	#DIV/0!	#DIV/0!	#DIV/0!	#DIV/0!	#DIV/0!	0
						#DIV/0!		#DIV/0!															#DIV/0!	#DIV/0!	#DIV/0!	#DIV/0!	#DIV/0!	#DIV/0!	#DIV/0!	#DIV/0!	#DIV/0!	#DIV/0!	#DIV/0!	#DIV/0!	#DIV/0!	0	0	0	0	0	0	#DIV/0!	#DIV/0!	#DIV/0!	#DIV/0!	#DIV/0!	#DIV/0!	#DIV/0!	0
						#DIV/0!		#DIV/0!															#DIV/0!	#DIV/0!	#DIV/0!	#DIV/0!	#DIV/0!	#DIV/0!	#DIV/0!	#DIV/0!	#DIV/0!	#DIV/0!	#DIV/0!	#DIV/0!	#DIV/0!	0	0	0	0	0	0	#DIV/0!	#DIV/0!	#DIV/0!	#DIV/0!	#DIV/0!	#DIV/0!	#DIV/0!	0
						#DIV/0!		#DIV/0!															#DIV/0!	#DIV/0!	#DIV/0!	#DIV/0!	#DIV/0!	#DIV/0!	#DIV/0!	#DIV/0!	#DIV/0!	#DIV/0!	#DIV/0!	#DIV/0!	#DIV/0!	0	0	0	0	0	0	#DIV/0!	#DIV/0!	#DIV/0!	#DIV/0!	#DIV/0!	#DIV/0!	#DIV/0!	0
						#DIV/0!		#DIV/0!															#DIV/0!	#DIV/0!	#DIV/0!	#DIV/0!	#DIV/0!	#DIV/0!	#DIV/0!	#DIV/0!	#DIV/0!	#DIV/0!	#DIV/0!	#DIV/0!	#DIV/0!	0	0	0	0	0	0	#DIV/0!	#DIV/0!	#DIV/0!	#DIV/0!	#DIV/0!	#DIV/0!	#DIV/0!	0
						#DIV/0!		#DIV/0!															#DIV/0!	#DIV/0!	#DIV/0!	#DIV/0!	#DIV/0!	#DIV/0!	#DIV/0!	#DIV/0!	#DIV/0!	#DIV/0!	#DIV/0!	#DIV/0!	#DIV/0!	0	0	0	0	0	0	#DIV/0!	#DIV/0!	#DIV/0!	#DIV/0!	#DIV/0!	#DIV/0!	#DIV/0!	0
						#DIV/0!		#DIV/0!															#DIV/0!	#DIV/0!	#DIV/0!	#DIV/0!	#DIV/0!	#DIV/0!	#DIV/0!	#DIV/0!	#DIV/0!	#DIV/0!	#DIV/0!	#DIV/0!	#DIV/0!	0	0	0	0	0	0	#DIV/0!	#DIV/0!	#DIV/0!	#DIV/0!	#DIV/0!	#DIV/0!	#DIV/0!	0
						#DIV/0!		#DIV/0!															#DIV/0!	#DIV/0!	#DIV/0!	#DIV/0!	#DIV/0!	#DIV/0!	#DIV/0!	#DIV/0!	#DIV/0!	#DIV/0!	#DIV/0!	#DIV/0!	#DIV/0!	0	0	0	0	0	0	#DIV/0!	#DIV/0!	#DIV/0!	#DIV/0!	#DIV/0!	#DIV/0!	#DIV/0!	0
						#DIV/0!		#DIV/0!															#DIV/0!	#DIV/0!	#DIV/0!	#DIV/0!	#DIV/0!	#DIV/0!	#DIV/0!	#DIV/0!	#DIV/0!	#DIV/0!	#DIV/0!	#DIV/0!	#DIV/0!	0	0	0	0	0	0	#DIV/0!	#DIV/0!	#DIV/0!	#DIV/0!	#DIV/0!	#DIV/0!	#DIV/0!	0
						#DIV/0!		#DIV/0!															#DIV/0!	#DIV/0!	#DIV/0!	#DIV/0!	#DIV/0!	#DIV/0!	#DIV/0!	#DIV/0!	#DIV/0!	#DIV/0!	#DIV/0!	#DIV/0!	#DIV/0!	0	0	0	0	0	0	#DIV/0!	#DIV/0!	#DIV/0!	#DIV/0!	#DIV/0!	#DIV/0!	#DIV/0!	0
						#DIV/0!		#DIV/0!															#DIV/0!	#DIV/0!	#DIV/0!	#DIV/0!	#DIV/0!	#DIV/0!	#DIV/0!	#DIV/0!	#DIV/0!	#DIV/0!	#DIV/0!	#DIV/0!	#DIV/0!	0	0	0	0	0	0	#DIV/0!	#DIV/0!	#DIV/0!	#DIV/0!	#DIV/0!	#DIV/0!	#DIV/0!	0
						#DIV/0!		#DIV/0!															#DIV/0!	#DIV/0!	#DIV/0!	#DIV/0!	#DIV/0!	#DIV/0!	#DIV/0!	#DIV/0!	#DIV/0!	#DIV/0!	#DIV/0!	#DIV/0!	#DIV/0!	0	0	0	0	0	0	#DIV/0!	#DIV/0!	#DIV/0!	#DIV/0!	#DIV/0!	#DIV/0!	#DIV/0!	0
						#DIV/0!		#DIV/0!															#DIV/0!	#DIV/0!	#DIV/0!	#DIV/0!	#DIV/0!	#DIV/0!	#DIV/0!	#DIV/0!	#DIV/0!	#DIV/0!	#DIV/0!	#DIV/0!	#DIV/0!	0	0	0	0	0	0	#DIV/0!	#DIV/0!	#DIV/0!	#DIV/0!	#DIV/0!	#DIV/0!	#DIV/0!	0
						#DIV/0!		#DIV/0!															#DIV/0!	#DIV/0!	#DIV/0!	#DIV/0!	#DIV/0!	#DIV/0!	#DIV/0!	#DIV/0!	#DIV/0!	#DIV/0!	#DIV/0!	#DIV/0!	#DIV/0!	0	0	0	0	0	0	#DIV/0!	#DIV/0!	#DIV/0!	#DIV/0!	#DIV/0!	#DIV/0!	#DIV/0!	0
						#DIV/0!		#DIV/0!															#DIV/0!	#DIV/0!	#DIV/0!	#DIV/0!	#DIV/0!	#DIV/0!	#DIV/0!	#DIV/0!	#DIV/0!	#DIV/0!	#DIV/0!	#DIV/0!	#DIV/0!	0	0	0	0	0	0	#DIV/0!	#DIV/0!	#DIV/0!	#DIV/0!	#DIV/0!	#DIV/0!	#DIV/0!	0
						#DIV/0!		#DIV/0!															#DIV/0!	#DIV/0!	#DIV/0!	#DIV/0!	#DIV/0!	#DIV/0!	#DIV/0!	#DIV/0!	#DIV/0!	#DIV/0!	#DIV/0!	#DIV/0!	#DIV/0!	0	0	0	0	0	0	#DIV/0!	#DIV/0!	#DIV/0!	#DIV/0!	#DIV/0!	#DIV/0!	#DIV/0!	0
						#DIV/0!		#DIV/0!															#DIV/0!	#DIV/0!	#DIV/0!	#DIV/0!	#DIV/0!	#DIV/0!	#DIV/0!	#DIV/0!	#DIV/0!	#DIV/0!	#DIV/0!	#DIV/0!	#DIV/0!	0	0	0	0	0	0	#DIV/0!	#DIV/0!	#DIV/0!	#DIV/0!	#DIV/0!	#DIV/0!	#DIV/0!	0
						#DIV/0!		#DIV/0!															#DIV/0!	#DIV/0!	#DIV/0!	#DIV/0!	#DIV/0!	#DIV/0!	#DIV/0!	#DIV/0!	#DIV/0!	#DIV/0!	#DIV/0!	#DIV/0!	#DIV/0!	0	0	0	0	0	0	#DIV/0!	#DIV/0!	#DIV/0!	#DIV/0!	#DIV/0!	#DIV/0!	#DIV/0!	0
						#DIV/0!		#DIV/0!															#DIV/0!	#DIV/0!	#DIV/0!	#DIV/0!	#DIV/0!	#DIV/0!	#DIV/0!	#DIV/0!	#DIV/0!	#DIV/0!	#DIV/0!	#DIV/0!	#DIV/0!	0	0	0	0	0	0	#DIV/0!	#DIV/0!	#DIV/0!	#DIV/0!	#DIV/0!	#DIV/0!	#DIV/0!	0
						#DIV/0!		#DIV/0!															#DIV/0!	#DIV/0!	#DIV/0!	#DIV/0!	#DIV/0!	#DIV/0!	#DIV/0!	#DIV/0!	#DIV/0!	#DIV/0!	#DIV/0!	#DIV/0!	#DIV/0!	0	0	0	0	0	0	#DIV/0!	#DIV/0!	#DIV/0!	#DIV/0!	#DIV/0!	#DIV/0!	#DIV/0!	0
						#DIV/0!		#DIV/0!															#DIV/0!	#DIV/0!	#DIV/0!	#DIV/0!	#DIV/0!	#DIV/0!	#DIV/0!	#DIV/0!	#DIV/0!	#DIV/0!	#DIV/0!	#DIV/0!	#DIV/0!	0	0	0	0	0	0	#DIV/0!	#DIV/0!	#DIV/0!	#DIV/0!	#DIV/0!	#DIV/0!	#DIV/0!	0
						#DIV/0!		#DIV/0!															#DIV/0!	#DIV/0!	#DIV/0!	#DIV/0!	#DIV/0!	#DIV/0!	#DIV/0!	#DIV/0!	#DIV/0!	#DIV/0!	#DIV/0!	#DIV/0!	#DIV/0!	0	0	0	0	0	0	#DIV/0!	#DIV/0!	#DIV/0!	#DIV/0!	#DIV/0!	#DIV/0!	#DIV/0!	0
						#DIV/0!		#DIV/0!															#DIV/0!	#DIV/0!	#DIV/0!	#DIV/0!	#DIV/0!	#DIV/0!	#DIV/0!	#DIV/0!	#DIV/0!	#DIV/0!	#DIV/0!	#DIV/0!	#DIV/0!	0	0	0	0	0	0	#DIV/0!	#DIV/0!	#DIV/0!	#DIV/0!	#DIV/0!	#DIV/0!	#DIV/0!	0
						#DIV/0!		#DIV/0!															#DIV/0!	#DIV/0!	#DIV/0!	#DIV/0!	#DIV/0!	#DIV/0!	#DIV/0!	#DIV/0!	#DIV/0!	#DIV/0!	#DIV/0!	#DIV/0!	#DIV/0!	0	0	0	0	0	0	#DIV/0!	#DIV/0!	#DIV/0!	#DIV/0!	#DIV/0!	#DIV/0!	#DIV/0!	0
						#DIV/0!		#DIV/0!															#DIV/0!	#DIV/0!	#DIV/0!	#DIV/0!	#DIV/0!	#DIV/0!	#DIV/0!	#DIV/0!	#DIV/0!	#DIV/0!	#DIV/0!	#DIV/0!	#DIV/0!	0	0	0	0	0	0	#DIV/0!	#DIV/0!	#DIV/0!	#DIV/0!	#DIV/0!	#DIV/0!	#DIV/0!	0
						#DIV/0!		#DIV/0!															#DIV/0!	#DIV/0!	#DIV/0!	#DIV/0!	#DIV/0!	#DIV/0!	#DIV/0!	#DIV/0!	#DIV/0!	#DIV/0!	#DIV/0!	#DIV/0!	#DIV/0!	0	0	0	0	0	0	#DIV/0!	#DIV/0!	#DIV/0!	#DIV/0!	#DIV/0!	#DIV/0!	#DIV/0!	0
						#DIV/0!		#DIV/0!															#DIV/0!	#DIV/0!	#DIV/0!	#DIV/0!	#DIV/0!	#DIV/0!	#DIV/0!	#DIV/0!	#DIV/0!	#DIV/0!	#DIV/0!	#DIV/0!	#DIV/0!	0	0	0	0	0	0	#DIV/0!	#DIV/0!	#DIV/0!	#DIV/0!	#DIV/0!	#DIV/0!	#DIV/0!	0
						#DIV/0!		#DIV/0!															#DIV/0!	#DIV/0!	#DIV/0!	#DIV/0!	#DIV/0!	#DIV/0!	#DIV/0!	#DIV/0!	#DIV/0!	#DIV/0!	#DIV/0!	#DIV/0!	#DIV/0!	0	0	0	0	0	0	#DIV/0!	#DIV/0!	#DIV/0!	#DIV/0!	#DIV/0!	#DIV/0!	#DIV/0!	0
						#DIV/0!		#DIV/0!															#DIV/0!	#DIV/0!	#DIV/0!	#DIV/0!	#DIV/0!	#DIV/0!	#DIV/0!	#DIV/0!	#DIV/0!	#DIV/0!	#DIV/0!	#DIV/0!	#DIV/0!	0	0	0	0	0	0	#DIV/0!	#DIV/0!	#DIV/0!	#DIV/0!	#DIV/0!	#DIV/0!	#DIV/0!	0
						#DIV/0!		#DIV/0!															#DIV/0!	#DIV/0!	#DIV/0!	#DIV/0!	#DIV/0!	#DIV/0!	#DIV/0!	#DIV/0!	#DIV/0!	#DIV/0!	#DIV/0!	#DIV/0!	#DIV/0!	0	0	0	0	0	0	#DIV/0!	#DIV/0!	#DIV/0!	#DIV/0!	#DIV/0!	#DIV/0!	#DIV/0!	0
						#DIV/0!		#DIV/0!															#DIV/0!	#DIV/0!	#DIV/0!	#DIV/0!	#DIV/0!	#DIV/0!	#DIV/0!	#DIV/0!	#DIV/0!	#DIV/0!	#DIV/0!	#DIV/0!	#DIV/0!	0	0	0	0	0	0	#DIV/0!	#DIV/0!	#DIV/0!	#DIV/0!	#DIV/0!	#DIV/0!	#DIV/0!	0
						#DIV/0!		#DIV/0!															#DIV/0!	#DIV/0!	#DIV/0!	#DIV/0!	#DIV/0!	#DIV/0!	#DIV/0!	#DIV/0!	#DIV/0!	#DIV/0!	#DIV/0!	#DIV/0!	#DIV/0!	0	0	0	0	0	0	#DIV/0!	#DIV/0!	#DIV/0!	#DIV/0!	#DIV/0!	#DIV/0!	#DIV/0!	0
						#DIV/0!		#DIV/0!															#DIV/0!	#DIV/0!	#DIV/0!	#DIV/0!	#DIV/0!	#DIV/0!	#DIV/0!	#DIV/0!	#DIV/0!	#DIV/0!	#DIV/0!	#DIV/0!	#DIV/0!	0	0	0	0	0	0	#DIV/0!	#DIV/0!	#DIV/0!	#DIV/0!	#DIV/0!	#DIV/0!	#DIV/0!	0
						#DIV/0!		#DIV/0!															#DIV/0!	#DIV/0!	#DIV/0!	#DIV/0!	#DIV/0!	#DIV/0!	#DIV/0!	#DIV/0!	#DIV/0!	#DIV/0!	#DIV/0!	#DIV/0!	#DIV/0!	0	0	0	0	0	0	#DIV/0!	#DIV/0!	#DIV/0!	#DIV/0!	#DIV/0!	#DIV/0!	#DIV/0!	0
						#DIV/0!		#DIV/0!															#DIV/0!	#DIV/0!	#DIV/0!	#DIV/0!	#DIV/0!	#DIV/0!	#DIV/0!	#DIV/0!	#DIV/0!	#DIV/0!	#DIV/0!	#DIV/0!	#DIV/0!	0	0	0	0	0	0	#DIV/0!	#DIV/0!	#DIV/0!	#DIV/0!	#DIV/0!	#DIV/0!	#DIV/0!	0
						#DIV/0!		#DIV/0!															#DIV/0!	#DIV/0!	#DIV/0!	#DIV/0!	#DIV/0!	#DIV/0!	#DIV/0!	#DIV/0!	#DIV/0!	#DIV/0!	#DIV/0!	#DIV/0!	#DIV/0!	0	0	0	0	0	0	#DIV/0!	#DIV/0!	#DIV/0!	#DIV/0!	#DIV/0!	#DIV/0!	#DIV/0!	0
						#DIV/0!		#DIV/0!															#DIV/0!	#DIV/0!	#DIV/0!	#DIV/0!	#DIV/0!	#DIV/0!	#DIV/0!	#DIV/0!	#DIV/0!	#DIV/0!	#DIV/0!	#DIV/0!	#DIV/0!	0	0	0	0	0	0	#DIV/0!	#DIV/0!	#DIV/0!	#DIV/0!	#DIV/0!	#DIV/0!	#DIV/0!	0
						#DIV/0!		#DIV/0!															#DIV/0!	#DIV/0!	#DIV/0!	#DIV/0!	#DIV/0!	#DIV/0!	#DIV/0!	#DIV/0!	#DIV/0!	#DIV/0!	#DIV/0!	#DIV/0!	#DIV/0!	0	0	0	0	0	0	#DIV/0!	#DIV/0!	#DIV/0!	#DIV/0!	#DIV/0!	#DIV/0!	#DIV/0!	0
						#DIV/0!		#DIV/0!															#DIV/0!	#DIV/0!	#DIV/0!	#DIV/0!	#DIV/0!	#DIV/0!	#DIV/0!	#DIV/0!	#DIV/0!	#DIV/0!	#DIV/0!	#DIV/0!	#DIV/0!	0	0	0	0	0	0	#DIV/0!	#DIV/0!	#DIV/0!	#DIV/0!	#DIV/0!	#DIV/0!	#DIV/0!	0
						#DIV/0!		#DIV/0!															#DIV/0!	#DIV/0!	#DIV/0!	#DIV/0!	#DIV/0!	#DIV/0!	#DIV/0!	#DIV/0!	#DIV/0!	#DIV/0!	#DIV/0!	#DIV/0!	#DIV/0!	0	0	0	0	0	0	#DIV/0!	#DIV/0!	#DIV/0!	#DIV/0!	#DIV/0!	#DIV/0!	#DIV/0!	0
						#DIV/0!		#DIV/0!															#DIV/0!	#DIV/0!	#DIV/0!	#DIV/0!	#DIV/0!	#DIV/0!	#DIV/0!	#DIV/0!	#DIV/0!	#DIV/0!	#DIV/0!	#DIV/0!	#DIV/0!	0	0	0	0	0	0	#DIV/0!	#DIV/0!	#DIV/0!	#DIV/0!	#DIV/0!	#DIV/0!	#DIV/0!	0
						#DIV/0!		#DIV/0!															#DIV/0!	#DIV/0!	#DIV/0!	#DIV/0!	#DIV/0!	#DIV/0!	#DIV/0!	#DIV/0!	#DIV/0!	#DIV/0!	#DIV/0!	#DIV/0!	#DIV/0!	0	0	0	0	0	0	#DIV/0!	#DIV/0!	#DIV/0!	#DIV/0!	#DIV/0!	#DIV/0!	#DIV/0!	0
						#DIV/0!		#DIV/0!															#DIV/0!	#DIV/0!	#DIV/0!	#DIV/0!	#DIV/0!	#DIV/0!	#DIV/0!	#DIV/0!	#DIV/0!	#DIV/0!	#DIV/0!	#DIV/0!	#DIV/0!	0	0	0	0	0	0	#DIV/0!	#DIV/0!	#DIV/0!	#DIV/0!	#DIV/0!	#DIV/0!	#DIV/0!	0
						#DIV/0!		#DIV/0!															#DIV/0!	#DIV/0!	#DIV/0!	#DIV/0!	#DIV/0!	#DIV/0!	#DIV/0!	#DIV/0!	#DIV/0!	#DIV/0!	#DIV/0!	#DIV/0!	#DIV/0!	0	0	0	0	0	0	#DIV/0!	#DIV/0!	#DIV/0!	#DIV/0!	#DIV/0!	#DIV/0!	#DIV/0!	0
						#DIV/0!		#DIV/0!															#DIV/0!	#DIV/0!	#DIV/0!	#DIV/0!	#DIV/0!	#DIV/0!	#DIV/0!	#DIV/0!	#DIV/0!	#DIV/0!	#DIV/0!	#DIV/0!	#DIV/0!	0	0	0	0	0	0	#DIV/0!	#DIV/0!	#DIV/0!	#DIV/0!	#DIV/0!	#DIV/0!	#DIV/0!	0
						#DIV/0!		#DIV/0!															#DIV/0!	#DIV/0!	#DIV/0!	#DIV/0!	#DIV/0!	#DIV/0!	#DIV/0!	#DIV/0!	#DIV/0!	#DIV/0!	#DIV/0!	#DIV/0!	#DIV/0!	0	0	0	0	0	0	#DIV/0!	#DIV/0!	#DIV/0!	#DIV/0!	#DIV/0!	#DIV/0!	#DIV/0!	0
						#DIV/0!		#DIV/0!															#DIV/0!	#DIV/0!	#DIV/0!	#DIV/0!	#DIV/0!	#DIV/0!	#DIV/0!	#DIV/0!	#DIV/0!	#DIV/0!	#DIV/0!	#DIV/0!	#DIV/0!	0	0	0	0	0	0	#DIV/0!	#DIV/0!	#DIV/0!	#DIV/0!	#DIV/0!	#DIV/0!	#DIV/0!	0
						#DIV/0!		#DIV/0!															#DIV/0!	#DIV/0!	#DIV/0!	#DIV/0!	#DIV/0!	#DIV/0!	#DIV/0!	#DIV/0!	#DIV/0!	#DIV/0!	#DIV/0!	#DIV/0!	#DIV/0!	0	0	0	0	0	0	#DIV/0!	#DIV/0!	#DIV/0!	#DIV/0!	#DIV/0!	#DIV/0!	#DIV/0!	0
						#DIV/0!		#DIV/0!															#DIV/0!	#DIV/0!	#DIV/0!	#DIV/0!	#DIV/0!	#DIV/0!	#DIV/0!	#DIV/0!	#DIV/0!	#DIV/0!	#DIV/0!	#DIV/0!	#DIV/0!	0	0	0	0	0	0	#DIV/0!	#DIV/0!	#DIV/0!	#DIV/0!	#DIV/0!	#DIV/0!	#DIV/0!	0
						#DIV/0!		#DIV/0!															#DIV/0!	#DIV/0!	#DIV/0!	#DIV/0!	#DIV/0!	#DIV/0!	#DIV/0!	#DIV/0!	#DIV/0!	#DIV/0!	#DIV/0!	#DIV/0!	#DIV/0!	0	0	0	0	0	0	#DIV/0!	#DIV/0!	#DIV/0!	#DIV/0!	#DIV/0!	#DIV/0!	#DIV/0!	0
						#DIV/0!		#DIV/0!															#DIV/0!	#DIV/0!	#DIV/0!	#DIV/0!	#DIV/0!	#DIV/0!	#DIV/0!	#DIV/0!	#DIV/0!	#DIV/0!	#DIV/0!	#DIV/0!	#DIV/0!	0	0	0	0	0	0	#DIV/0!	#DIV/0!	#DIV/0!	#DIV/0!	#DIV/0!	#DIV/0!	#DIV/0!	0
						#DIV/0!		#DIV/0!															#DIV/0!	#DIV/0!	#DIV/0!	#DIV/0!	#DIV/0!	#DIV/0!	#DIV/0!	#DIV/0!	#DIV/0!	#DIV/0!	#DIV/0!	#DIV/0!	#DIV/0!	0	0	0	0	0	0	#DIV/0!	#DIV/0!	#DIV/0!	#DIV/0!	#DIV/0!	#DIV/0!	#DIV/0!	0
						#DIV/0!		#DIV/0!															#DIV/0!	#DIV/0!	#DIV/0!	#DIV/0!	#DIV/0!	#DIV/0!	#DIV/0!	#DIV/0!	#DIV/0!	#DIV/0!	#DIV/0!	#DIV/0!	#DIV/0!	0	0	0	0	0	0	#DIV/0!	#DIV/0!	#DIV/0!	#DIV/0!	#DIV/0!	#DIV/0!	#DIV/0!	0
						#DIV/0!		#DIV/0!															#DIV/0!	#DIV/0!	#DIV/0!	#DIV/0!	#DIV/0!	#DIV/0!	#DIV/0!	#DIV/0!	#DIV/0!	#DIV/0!	#DIV/0!	#DIV/0!	#DIV/0!	0	0	0	0	0	0	#DIV/0!	#DIV/0!	#DIV/0!	#DIV/0!	#DIV/0!	#DIV/0!	#DIV/0!	0
						#DIV/0!		#DIV/0!															#DIV/0!	#DIV/0!	#DIV/0!	#DIV/0!	#DIV/0!	#DIV/0!	#DIV/0!	#DIV/0!	#DIV/0!	#DIV/0!	#DIV/0!	#DIV/0!	#DIV/0!	0	0	0	0	0	0	#DIV/0!	#DIV/0!	#DIV/0!	#DIV/0!	#DIV/0!	#DIV/0!	#DIV/0!	0
						#DIV/0!		#DIV/0!															#DIV/0!	#DIV/0!	#DIV/0!	#DIV/0!	#DIV/0!	#DIV/0!	#DIV/0!	#DIV/0!	#DIV/0!	#DIV/0!	#DIV/0!	#DIV/0!	#DIV/0!	0	0	0	0	0	0	#DIV/0!	#DIV/0!	#DIV/0!	#DIV/0!	#DIV/0!	#DIV/0!	#DIV/0!	0
						#DIV/0!		#DIV/0!															#DIV/0!	#DIV/0!	#DIV/0!	#DIV/0!	#DIV/0!	#DIV/0!	#DIV/0!	#DIV/0!	#DIV/0!	#DIV/0!	#DIV/0!	#DIV/0!	#DIV/0!	0	0	0	0	0	0	#DIV/0!	#DIV/0!	#DIV/0!	#DIV/0!	#DIV/0!	#DIV/0!	#DIV/0!	0
						#DIV/0!		#DIV/0!															#DIV/0!	#DIV/0!	#DIV/0!	#DIV/0!	#DIV/0!	#DIV/0!	#DIV/0!	#DIV/0!	#DIV/0!	#DIV/0!	#DIV/0!	#DIV/0!	#DIV/0!	0	0	0	0	0	0	#DIV/0!	#DIV/0!	#DIV/0!	#DIV/0!	#DIV/0!	#DIV/0!	#DIV/0!	0
						#DIV/0!		#DIV/0!															#DIV/0!	#DIV/0!	#DIV/0!	#DIV/0!	#DIV/0!	#DIV/0!	#DIV/0!	#DIV/0!	#DIV/0!	#DIV/0!	#DIV/0!	#DIV/0!	#DIV/0!	0	0	0	0	0	0	#DIV/0!	#DIV/0!	#DIV/0!	#DIV/0!	#DIV/0!	#DIV/0!	#DIV/0!	0
						#DIV/0!		#DIV/0!															#DIV/0!	#DIV/0!	#DIV/0!	#DIV/0!	#DIV/0!	#DIV/0!	#DIV/0!	#DIV/0!	#DIV/0!	#DIV/0!	#DIV/0!	#DIV/0!	#DIV/0!	0	0	0	0	0	0	#DIV/0!	#DIV/0!	#DIV/0!	#DIV/0!	#DIV/0!	#DIV/0!	#DIV/0!	0
						#DIV/0!		#DIV/0!															#DIV/0!	#DIV/0!	#DIV/0!	#DIV/0!	#DIV/0!	#DIV/0!	#DIV/0!	#DIV/0!	#DIV/0!	#DIV/0!	#DIV/0!	#DIV/0!	#DIV/0!	0	0	0	0	0	0	#DIV/0!	#DIV/0!	#DIV/0!	#DIV/0!	#DIV/0!	#DIV/0!	#DIV/0!	0
						#DIV/0!		#DIV/0!															#DIV/0!	#DIV/0!	#DIV/0!	#DIV/0!	#DIV/0!	#DIV/0!	#DIV/0!	#DIV/0!	#DIV/0!	#DIV/0!	#DIV/0!	#DIV/0!	#DIV/0!	0	0	0	0	0	0	#DIV/0!	#DIV/0!	#DIV/0!	#DIV/0!	#DIV/0!	#DIV/0!	#DIV/0!	0
						#DIV/0!		#DIV/0!															#DIV/0!	#DIV/0!	#DIV/0!	#DIV/0!	#DIV/0!	#DIV/0!	#DIV/0!	#DIV/0!	#DIV/0!	#DIV/0!	#DIV/0!	#DIV/0!	#DIV/0!	0	0	0	0	0	0	#DIV/0!	#DIV/0!	#DIV/0!	#DIV/0!	#DIV/0!	#DIV/0!	#DIV/0!	0
						#DIV/0!		#DIV/0!															#DIV/0!	#DIV/0!	#DIV/0!	#DIV/0!	#DIV/0!	#DIV/0!	#DIV/0!	#DIV/0!	#DIV/0!	#DIV/0!	#DIV/0!	#DIV/0!	#DIV/0!	0	0	0	0	0	0	#DIV/0!	#DIV/0!	#DIV/0!	#DIV/0!	#DIV/0!	#DIV/0!	#DIV/0!	0
						#DIV/0!		#DIV/0!															#DIV/0!	#DIV/0!	#DIV/0!	#DIV/0!	#DIV/0!	#DIV/0!	#DIV/0!	#DIV/0!	#DIV/0!	#DIV/0!	#DIV/0!	#DIV/0!	#DIV/0!	0	0	0	0	0	0	#DIV/0!	#DIV/0!	#DIV/0!	#DIV/0!	#DIV/0!	#DIV/0!	#DIV/0!	0
						#DIV/0!		#DIV/0!															#DIV/0!	#DIV/0!	#DIV/0!	#DIV/0!	#DIV/0!	#DIV/0!	#DIV/0!	#DIV/0!	#DIV/0!	#DIV/0!	#DIV/0!	#DIV/0!	#DIV/0!	0	0	0	0	0	0	#DIV/0!	#DIV/0!	#DIV/0!	#DIV/0!	#DIV/0!	#DIV/0!	#DIV/0!	0
						#DIV/0!		#DIV/0!															#DIV/0!	#DIV/0!	#DIV/0!	#DIV/0!	#DIV/0!	#DIV/0!	#DIV/0!	#DIV/0!	#DIV/0!	#DIV/0!	#DIV/0!	#DIV/0!	#DIV/0!	0	0	0	0	0	0	#DIV/0!	#DIV/0!	#DIV/0!	#DIV/0!	#DIV/0!	#DIV/0!	#DIV/0!	0
						#DIV/0!		#DIV/0!															#DIV/0!	#DIV/0!	#DIV/0!	#DIV/0!	#DIV/0!	#DIV/0!	#DIV/0!	#DIV/0!	#DIV/0!	#DIV/0!	#DIV/0!	#DIV/0!	#DIV/0!	0	0	0	0	0	0	#DIV/0!	#DIV/0!	#DIV/0!	#DIV/0!	#DIV/0!	#DIV/0!	#DIV/0!	0
						#DIV/0!		#DIV/0!															#DIV/0!	#DIV/0!	#DIV/0!	#DIV/0!	#DIV/0!	#DIV/0!	#DIV/0!	#DIV/0!	#DIV/0!	#DIV/0!	#DIV/0!	#DIV/0!	#DIV/0!	0	0	0	0	0	0	#DIV/0!	#DIV/0!	#DIV/0!	#DIV/0!	#DIV/0!	#DIV/0!	#DIV/0!	0
						#DIV/0!		#DIV/0!															#DIV/0!	#DIV/0!	#DIV/0!	#DIV/0!	#DIV/0!	#DIV/0!	#DIV/0!	#DIV/0!	#DIV/0!	#DIV/0!	#DIV/0!	#DIV/0!	#DIV/0!	0	0	0	0	0	0	#DIV/0!	#DIV/0!	#DIV/0!	#DIV/0!	#DIV/0!	#DIV/0!	#DIV/0!	0
						#DIV/0!		#DIV/0!															#DIV/0!	#DIV/0!	#DIV/0!	#DIV/0!	#DIV/0!	#DIV/0!	#DIV/0!	#DIV/0!	#DIV/0!	#DIV/0!	#DIV/0!	#DIV/0!	#DIV/0!	0	0	0	0	0	0	#DIV/0!	#DIV/0!	#DIV/0!	#DIV/0!	#DIV/0!	#DIV/0!	#DIV/0!	0
						#DIV/0!		#DIV/0!															#DIV/0!	#DIV/0!	#DIV/0!	#DIV/0!	#DIV/0!	#DIV/0!	#DIV/0!	#DIV/0!	#DIV/0!	#DIV/0!	#DIV/0!	#DIV/0!	#DIV/0!	0	0	0	0	0	0	#DIV/0!	#DIV/0!	#DIV/0!	#DIV/0!	#DIV/0!	#DIV/0!	#DIV/0!	0
						#DIV/0!		#DIV/0!															#DIV/0!	#DIV/0!	#DIV/0!	#DIV/0!	#DIV/0!	#DIV/0!	#DIV/0!	#DIV/0!	#DIV/0!	#DIV/0!	#DIV/0!	#DIV/0!	#DIV/0!	0	0	0	0	0	0	#DIV/0!	#DIV/0!	#DIV/0!	#DIV/0!	#DIV/0!	#DIV/0!	#DIV/0!	0
						#DIV/0!		#DIV/0!															#DIV/0!	#DIV/0!	#DIV/0!	#DIV/0!	#DIV/0!	#DIV/0!	#DIV/0!	#DIV/0!	#DIV/0!	#DIV/0!	#DIV/0!	#DIV/0!	#DIV/0!	0	0	0	0	0	0	#DIV/0!	#DIV/0!	#DIV/0!	#DIV/0!	#DIV/0!	#DIV/0!	#DIV/0!	0
						#DIV/0!		#DIV/0!															#DIV/0!	#DIV/0!	#DIV/0!	#DIV/0!	#DIV/0!	#DIV/0!	#DIV/0!	#DIV/0!	#DIV/0!	#DIV/0!	#DIV/0!	#DIV/0!	#DIV/0!	0	0	0	0	0	0	#DIV/0!	#DIV/0!	#DIV/0!	#DIV/0!	#DIV/0!	#DIV/0!	#DIV/0!	0
						#DIV/0!		#DIV/0!															#DIV/0!	#DIV/0!	#DIV/0!	#DIV/0!	#DIV/0!	#DIV/0!	#DIV/0!	#DIV/0!	#DIV/0!	#DIV/0!	#DIV/0!	#DIV/0!	#DIV/0!	0	0	0	0	0	0	#DIV/0!	#DIV/0!	#DIV/0!	#DIV/0!	#DIV/0!	#DIV/0!	#DIV/0!	0
						#DIV/0!		#DIV/0!															#DIV/0!	#DIV/0!	#DIV/0!	#DIV/0!	#DIV/0!	#DIV/0!	#DIV/0!	#DIV/0!	#DIV/0!	#DIV/0!	#DIV/0!	#DIV/0!	#DIV/0!	0	0	0	0	0	0	#DIV/0!	#DIV/0!	#DIV/0!	#DIV/0!	#DIV/0!	#DIV/0!	#DIV/0!	0
						#DIV/0!		#DIV/0!															#DIV/0!	#DIV/0!	#DIV/0!	#DIV/0!	#DIV/0!	#DIV/0!	#DIV/0!	#DIV/0!	#DIV/0!	#DIV/0!	#DIV/0!	#DIV/0!	#DIV/0!	0	0	0	0	0	0	#DIV/0!	#DIV/0!	#DIV/0!	#DIV/0!	#DIV/0!	#DIV/0!	#DIV/0!	0
						#DIV/0!		#DIV/0!															#DIV/0!	#DIV/0!	#DIV/0!	#DIV/0!	#DIV/0!	#DIV/0!	#DIV/0!	#DIV/0!	#DIV/0!	#DIV/0!	#DIV/0!	#DIV/0!	#DIV/0!	0	0	0	0	0	0	#DIV/0!	#DIV/0!	#DIV/0!	#DIV/0!	#DIV/0!	#DIV/0!	#DIV/0!	0
						#DIV/0!		#DIV/0!															#DIV/0!	#DIV/0!	#DIV/0!	#DIV/0!	#DIV/0!	#DIV/0!	#DIV/0!	#DIV/0!	#DIV/0!	#DIV/0!	#DIV/0!	#DIV/0!	#DIV/0!	0	0	0	0	0	0	#DIV/0!	#DIV/0!	#DIV/0!	#DIV/0!	#DIV/0!	#DIV/0!	#DIV/0!	0
						#DIV/0!		#DIV/0!															#DIV/0!	#DIV/0!	#DIV/0!	#DIV/0!	#DIV/0!	#DIV/0!	#DIV/0!	#DIV/0!	#DIV/0!	#DIV/0!	#DIV/0!	#DIV/0!	#DIV/0!	0	0	0	0	0	0	#DIV/0!	#DIV/0!	#DIV/0!	#DIV/0!	#DIV/0!	#DIV/0!	#DIV/0!	0
						#DIV/0!		#DIV/0!															#DIV/0!	#DIV/0!	#DIV/0!	#DIV/0!	#DIV/0!	#DIV/0!	#DIV/0!	#DIV/0!	#DIV/0!	#DIV/0!	#DIV/0!	#DIV/0!	#DIV/0!	0	0	0	0	0	0	#DIV/0!	#DIV/0!	#DIV/0!	#DIV/0!	#DIV/0!	#DIV/0!	#DIV/0!	0
						#DIV/0!		#DIV/0!															#DIV/0!	#DIV/0!	#DIV/0!	#DIV/0!	#DIV/0!	#DIV/0!	#DIV/0!	#DIV/0!	#DIV/0!	#DIV/0!	#DIV/0!	#DIV/0!	#DIV/0!	0	0	0	0	0	0	#DIV/0!	#DIV/0!	#DIV/0!	#DIV/0!	#DIV/0!	#DIV/0!	#DIV/0!	0
						#DIV/0!		#DIV/0!															#DIV/0!	#DIV/0!	#DIV/0!	#DIV/0!	#DIV/0!	#DIV/0!	#DIV/0!	#DIV/0!	#DIV/0!	#DIV/0!	#DIV/0!	#DIV/0!	#DIV/0!	0	0	0	0	0	0	#DIV/0!	#DIV/0!	#DIV/0!	#DIV/0!	#DIV/0!	#DIV/0!	#DIV/0!	0
						#DIV/0!		#DIV/0!															#DIV/0!	#DIV/0!	#DIV/0!	#DIV/0!	#DIV/0!	#DIV/0!	#DIV/0!	#DIV/0!	#DIV/0!	#DIV/0!	#DIV/0!	#DIV/0!	#DIV/0!	0	0	0	0	0	0	#DIV/0!	#DIV/0!	#DIV/0!	#DIV/0!	#DIV/0!	#DIV/0!	#DIV/0!	0
						#DIV/0!		#DIV/0!															#DIV/0!	#DIV/0!	#DIV/0!	#DIV/0!	#DIV/0!	#DIV/0!	#DIV/0!	#DIV/0!	#DIV/0!	#DIV/0!	#DIV/0!	#DIV/0!	#DIV/0!	0	0	0	0	0	0	#DIV/0!	#DIV/0!	#DIV/0!	#DIV/0!	#DIV/0!	#DIV/0!	#DIV/0!	0
						#DIV/0!		#DIV/0!															#DIV/0!	#DIV/0!	#DIV/0!	#DIV/0!	#DIV/0!	#DIV/0!	#DIV/0!	#DIV/0!	#DIV/0!	#DIV/0!	#DIV/0!	#DIV/0!	#DIV/0!	0	0	0	0	0	0	#DIV/0!	#DIV/0!	#DIV/0!	#DIV/0!	#DIV/0!	#DIV/0!	#DIV/0!	0
						#DIV/0!		#DIV/0!															#DIV/0!	#DIV/0!	#DIV/0!	#DIV/0!	#DIV/0!	#DIV/0!	#DIV/0!	#DIV/0!	#DIV/0!	#DIV/0!	#DIV/0!	#DIV/0!	#DIV/0!	0	0	0	0	0	0	#DIV/0!	#DIV/0!	#DIV/0!	#DIV/0!	#DIV/0!	#DIV/0!	#DIV/0!	0
						#DIV/0!		#DIV/0!															#DIV/0!	#DIV/0!	#DIV/0!	#DIV/0!	#DIV/0!	#DIV/0!	#DIV/0!	#DIV/0!	#DIV/0!	#DIV/0!	#DIV/0!	#DIV/0!	#DIV/0!	0	0	0	0	0	0	#DIV/0!	#DIV/0!	#DIV/0!	#DIV/0!	#DIV/0!	#DIV/0!	#DIV/0!	0
						#DIV/0!		#DIV/0!															#DIV/0!	#DIV/0!	#DIV/0!	#DIV/0!	#DIV/0!	#DIV/0!	#DIV/0!	#DIV/0!	#DIV/0!	#DIV/0!	#DIV/0!	#DIV/0!	#DIV/0!	0	0	0	0	0	0	#DIV/0!	#DIV/0!	#DIV/0!	#DIV/0!	#DIV/0!	#DIV/0!	#DIV/0!	0
						#DIV/0!		#DIV/0!															#DIV/0!	#DIV/0!	#DIV/0!	#DIV/0!	#DIV/0!	#DIV/0!	#DIV/0!	#DIV/0!	#DIV/0!	#DIV/0!	#DIV/0!	#DIV/0!	#DIV/0!	0	0	0	0	0	0	#DIV/0!	#DIV/0!	#DIV/0!	#DIV/0!	#DIV/0!	#DIV/0!	#DIV/0!	0
						#DIV/0!		#DIV/0!															#DIV/0!	#DIV/0!	#DIV/0!	#DIV/0!	#DIV/0!	#DIV/0!	#DIV/0!	#DIV/0!	#DIV/0!	#DIV/0!	#DIV/0!	#DIV/0!	#DIV/0!	0	0	0	0	0	0	#DIV/0!	#DIV/0!	#DIV/0!	#DIV/0!	#DIV/0!	#DIV/0!	#DIV/0!	0
						#DIV/0!		#DIV/0!															#DIV/0!	#DIV/0!	#DIV/0!	#DIV/0!	#DIV/0!	#DIV/0!	#DIV/0!	#DIV/0!	#DIV/0!	#DIV/0!	#DIV/0!	#DIV/0!	#DIV/0!	0	0	0	0	0	0	#DIV/0!	#DIV/0!	#DIV/0!	#DIV/0!	#DIV/0!	#DIV/0!	#DIV/0!	0
						#DIV/0!		#DIV/0!															#DIV/0!	#DIV/0!	#DIV/0!	#DIV/0!	#DIV/0!	#DIV/0!	#DIV/0!	#DIV/0!	#DIV/0!	#DIV/0!	#DIV/0!	#DIV/0!	#DIV/0!	0	0	0	0	0	0	#DIV/0!	#DIV/0!	#DIV/0!	#DIV/0!	#DIV/0!	#DIV/0!	#DIV/0!	0
						#DIV/0!		#DIV/0!															#DIV/0!	#DIV/0!	#DIV/0!	#DIV/0!	#DIV/0!	#DIV/0!	#DIV/0!	#DIV/0!	#DIV/0!	#DIV/0!	#DIV/0!	#DIV/0!	#DIV/0!	0	0	0	0	0	0	#DIV/0!	#DIV/0!	#DIV/0!	#DIV/0!	#DIV/0!	#DIV/0!	#DIV/0!	0
						#DIV/0!		#DIV/0!															#DIV/0!	#DIV/0!	#DIV/0!	#DIV/0!	#DIV/0!	#DIV/0!	#DIV/0!	#DIV/0!	#DIV/0!	#DIV/0!	#DIV/0!	#DIV/0!	#DIV/0!	0	0	0	0	0	0	#DIV/0!	#DIV/0!	#DIV/0!	#DIV/0!	#DIV/0!	#DIV/0!	#DIV/0!	0
						#DIV/0!		#DIV/0!															#DIV/0!	#DIV/0!	#DIV/0!	#DIV/0!	#DIV/0!	#DIV/0!	#DIV/0!	#DIV/0!	#DIV/0!	#DIV/0!	#DIV/0!	#DIV/0!	#DIV/0!	0	0	0	0	0	0	#DIV/0!	#DIV/0!	#DIV/0!	#DIV/0!	#DIV/0!	#DIV/0!	#DIV/0!	0
						#DIV/0!		#DIV/0!															#DIV/0!	#DIV/0!	#DIV/0!	#DIV/0!	#DIV/0!	#DIV/0!	#DIV/0!	#DIV/0!	#DIV/0!	#DIV/0!	#DIV/0!	#DIV/0!	#DIV/0!	0	0	0	0	0	0	#DIV/0!	#DIV/0!	#DIV/0!	#DIV/0!	#DIV/0!	#DIV/0!	#DIV/0!	0
						#DIV/0!		#DIV/0!															#DIV/0!	#DIV/0!	#DIV/0!	#DIV/0!	#DIV/0!	#DIV/0!	#DIV/0!	#DIV/0!	#DIV/0!	#DIV/0!	#DIV/0!	#DIV/0!	#DIV/0!	0	0	0	0	0	0	#DIV/0!	#DIV/0!	#DIV/0!	#DIV/0!	#DIV/0!	#DIV/0!	#DIV/0!	0
						#DIV/0!		#DIV/0!															#DIV/0!	#DIV/0!	#DIV/0!	#DIV/0!	#DIV/0!	#DIV/0!	#DIV/0!	#DIV/0!	#DIV/0!	#DIV/0!	#DIV/0!	#DIV/0!	#DIV/0!	0	0	0	0	0	0	#DIV/0!	#DIV/0!	#DIV/0!	#DIV/0!	#DIV/0!	#DIV/0!	#DIV/0!	0
						#DIV/0!		#DIV/0!															#DIV/0!	#DIV/0!	#DIV/0!	#DIV/0!	#DIV/0!	#DIV/0!	#DIV/0!	#DIV/0!	#DIV/0!	#DIV/0!	#DIV/0!	#DIV/0!	#DIV/0!	0	0	0	0	0	0	#DIV/0!	#DIV/0!	#DIV/0!	#DIV/0!	#DIV/0!	#DIV/0!	#DIV/0!	0
						#DIV/0!		#DIV/0!															#DIV/0!	#DIV/0!	#DIV/0!	#DIV/0!	#DIV/0!	#DIV/0!	#DIV/0!	#DIV/0!	#DIV/0!	#DIV/0!	#DIV/0!	#DIV/0!	#DIV/0!	0	0	0	0	0	0	#DIV/0!	#DIV/0!	#DIV/0!	#DIV/0!	#DIV/0!	#DIV/0!	#DIV/0!	0
						#DIV/0!		#DIV/0!															#DIV/0!	#DIV/0!	#DIV/0!	#DIV/0!	#DIV/0!	#DIV/0!	#DIV/0!	#DIV/0!	#DIV/0!	#DIV/0!	#DIV/0!	#DIV/0!	#DIV/0!	0	0	0	0	0	0	#DIV/0!	#DIV/0!	#DIV/0!	#DIV/0!	#DIV/0!	#DIV/0!	#DIV/0!	0
						#DIV/0!		#DIV/0!															#DIV/0!	#DIV/0!	#DIV/0!	#DIV/0!	#DIV/0!	#DIV/0!	#DIV/0!	#DIV/0!	#DIV/0!	#DIV/0!	#DIV/0!	#DIV/0!	#DIV/0!	0	0	0	0	0	0	#DIV/0!	#DIV/0!	#DIV/0!	#DIV/0!	#DIV/0!	#DIV/0!	#DIV/0!	0
						#DIV/0!		#DIV/0!															#DIV/0!	#DIV/0!	#DIV/0!	#DIV/0!	#DIV/0!	#DIV/0!	#DIV/0!	#DIV/0!	#DIV/0!	#DIV/0!	#DIV/0!	#DIV/0!	#DIV/0!	0	0	0	0	0	0	#DIV/0!	#DIV/0!	#DIV/0!	#DIV/0!	#DIV/0!	#DIV/0!	#DIV/0!	0
						#DIV/0!		#DIV/0!															#DIV/0!	#DIV/0!	#DIV/0!	#DIV/0!	#DIV/0!	#DIV/0!	#DIV/0!	#DIV/0!	#DIV/0!	#DIV/0!	#DIV/0!	#DIV/0!	#DIV/0!	0	0	0	0	0	0	#DIV/0!	#DIV/0!	#DIV/0!	#DIV/0!	#DIV/0!	#DIV/0!	#DIV/0!	0
						#DIV/0!		#DIV/0!															#DIV/0!	#DIV/0!	#DIV/0!	#DIV/0!	#DIV/0!	#DIV/0!	#DIV/0!	#DIV/0!	#DIV/0!	#DIV/0!	#DIV/0!	#DIV/0!	#DIV/0!	0	0	0	0	0	0	#DIV/0!	#DIV/0!	#DIV/0!	#DIV/0!	#DIV/0!	#DIV/0!	#DIV/0!	0
						#DIV/0!		#DIV/0!															#DIV/0!	#DIV/0!	#DIV/0!	#DIV/0!	#DIV/0!	#DIV/0!	#DIV/0!	#DIV/0!	#DIV/0!	#DIV/0!	#DIV/0!	#DIV/0!	#DIV/0!	0	0	0	0	0	0	#DIV/0!	#DIV/0!	#DIV/0!	#DIV/0!	#DIV/0!	#DIV/0!	#DIV/0!	0
						#DIV/0!		#DIV/0!															#DIV/0!	#DIV/0!	#DIV/0!	#DIV/0!	#DIV/0!	#DIV/0!	#DIV/0!	#DIV/0!	#DIV/0!	#DIV/0!	#DIV/0!	#DIV/0!	#DIV/0!	0	0	0	0	0	0	#DIV/0!	#DIV/0!	#DIV/0!	#DIV/0!	#DIV/0!	#DIV/0!	#DIV/0!	0
						#DIV/0!		#DIV/0!															#DIV/0!	#DIV/0!	#DIV/0!	#DIV/0!	#DIV/0!	#DIV/0!	#DIV/0!	#DIV/0!	#DIV/0!	#DIV/0!	#DIV/0!	#DIV/0!	#DIV/0!	0	0	0	0	0	0	#DIV/0!	#DIV/0!	#DIV/0!	#DIV/0!	#DIV/0!	#DIV/0!	#DIV/0!	0
						#DIV/0!		#DIV/0!															#DIV/0!	#DIV/0!	#DIV/0!	#DIV/0!	#DIV/0!	#DIV/0!	#DIV/0!	#DIV/0!	#DIV/0!	#DIV/0!	#DIV/0!	#DIV/0!	#DIV/0!	0	0	0	0	0	0	#DIV/0!	#DIV/0!	#DIV/0!	#DIV/0!	#DIV/0!	#DIV/0!	#DIV/0!	0
						#DIV/0!		#DIV/0!															#DIV/0!	#DIV/0!	#DIV/0!	#DIV/0!	#DIV/0!	#DIV/0!	#DIV/0!	#DIV/0!	#DIV/0!	#DIV/0!	#DIV/0!	#DIV/0!	#DIV/0!	0	0	0	0	0	0	#DIV/0!	#DIV/0!	#DIV/0!	#DIV/0!	#DIV/0!	#DIV/0!	#DIV/0!	0
						#DIV/0!		#DIV/0!															#DIV/0!	#DIV/0!	#DIV/0!	#DIV/0!	#DIV/0!	#DIV/0!	#DIV/0!	#DIV/0!	#DIV/0!	#DIV/0!	#DIV/0!	#DIV/0!	#DIV/0!	0	0	0	0	0	0	#DIV/0!	#DIV/0!	#DIV/0!	#DIV/0!	#DIV/0!	#DIV/0!	#DIV/0!	0
						#DIV/0!		#DIV/0!															#DIV/0!	#DIV/0!	#DIV/0!	#DIV/0!	#DIV/0!	#DIV/0!	#DIV/0!	#DIV/0!	#DIV/0!	#DIV/0!	#DIV/0!	#DIV/0!	#DIV/0!	0	0	0	0	0	0	#DIV/0!	#DIV/0!	#DIV/0!	#DIV/0!	#DIV/0!	#DIV/0!	#DIV/0!	0
						#DIV/0!		#DIV/0!															#DIV/0!	#DIV/0!	#DIV/0!	#DIV/0!	#DIV/0!	#DIV/0!	#DIV/0!	#DIV/0!	#DIV/0!	#DIV/0!	#DIV/0!	#DIV/0!	#DIV/0!	0	0	0	0	0	0	#DIV/0!	#DIV/0!	#DIV/0!	#DIV/0!	#DIV/0!	#DIV/0!	#DIV/0!	0
						#DIV/0!		#DIV/0!															#DIV/0!	#DIV/0!	#DIV/0!	#DIV/0!	#DIV/0!	#DIV/0!	#DIV/0!	#DIV/0!	#DIV/0!	#DIV/0!	#DIV/0!	#DIV/0!	#DIV/0!	0	0	0	0	0	0	#DIV/0!	#DIV/0!	#DIV/0!	#DIV/0!	#DIV/0!	#DIV/0!	#DIV/0!	0
						#DIV/0!		#DIV/0!															#DIV/0!	#DIV/0!	#DIV/0!	#DIV/0!	#DIV/0!	#DIV/0!	#DIV/0!	#DIV/0!	#DIV/0!	#DIV/0!	#DIV/0!	#DIV/0!	#DIV/0!	0	0	0	0	0	0	#DIV/0!	#DIV/0!	#DIV/0!	#DIV/0!	#DIV/0!	#DIV/0!	#DIV/0!	0
						#DIV/0!		#DIV/0!															#DIV/0!	#DIV/0!	#DIV/0!	#DIV/0!	#DIV/0!	#DIV/0!	#DIV/0!	#DIV/0!	#DIV/0!	#DIV/0!	#DIV/0!	#DIV/0!	#DIV/0!	0	0	0	0	0	0	#DIV/0!	#DIV/0!	#DIV/0!	#DIV/0!	#DIV/0!	#DIV/0!	#DIV/0!	0
						#DIV/0!		#DIV/0!															#DIV/0!	#DIV/0!	#DIV/0!	#DIV/0!	#DIV/0!	#DIV/0!	#DIV/0!	#DIV/0!	#DIV/0!	#DIV/0!	#DIV/0!	#DIV/0!	#DIV/0!	0	0	0	0	0	0	#DIV/0!	#DIV/0!	#DIV/0!	#DIV/0!	#DIV/0!	#DIV/0!	#DIV/0!	0
						#DIV/0!		#DIV/0!															#DIV/0!	#DIV/0!	#DIV/0!	#DIV/0!	#DIV/0!	#DIV/0!	#DIV/0!	#DIV/0!	#DIV/0!	#DIV/0!	#DIV/0!	#DIV/0!	#DIV/0!	0	0	0	0	0	0	#DIV/0!	#DIV/0!	#DIV/0!	#DIV/0!	#DIV/0!	#DIV/0!	#DIV/0!	0
						#DIV/0!		#DIV/0!															#DIV/0!	#DIV/0!	#DIV/0!	#DIV/0!	#DIV/0!	#DIV/0!	#DIV/0!	#DIV/0!	#DIV/0!	#DIV/0!	#DIV/0!	#DIV/0!	#DIV/0!	0	0	0	0	0	0	#DIV/0!	#DIV/0!	#DIV/0!	#DIV/0!	#DIV/0!	#DIV/0!	#DIV/0!	0
						#DIV/0!		#DIV/0!															#DIV/0!	#DIV/0!	#DIV/0!	#DIV/0!	#DIV/0!	#DIV/0!	#DIV/0!	#DIV/0!	#DIV/0!	#DIV/0!	#DIV/0!	#DIV/0!	#DIV/0!	0	0	0	0	0	0	#DIV/0!	#DIV/0!	#DIV/0!	#DIV/0!	#DIV/0!	#DIV/0!	#DIV/0!	0
						#DIV/0!		#DIV/0!															#DIV/0!	#DIV/0!	#DIV/0!	#DIV/0!	#DIV/0!	#DIV/0!	#DIV/0!	#DIV/0!	#DIV/0!	#DIV/0!	#DIV/0!	#DIV/0!	#DIV/0!	0	0	0	0	0	0	#DIV/0!	#DIV/0!	#DIV/0!	#DIV/0!	#DIV/0!	#DIV/0!	#DIV/0!	0
						#DIV/0!		#DIV/0!															#DIV/0!	#DIV/0!	#DIV/0!	#DIV/0!	#DIV/0!	#DIV/0!	#DIV/0!	#DIV/0!	#DIV/0!	#DIV/0!	#DIV/0!	#DIV/0!	#DIV/0!	0	0	0	0	0	0	#DIV/0!	#DIV/0!	#DIV/0!	#DIV/0!	#DIV/0!	#DIV/0!	#DIV/0!	0
						#DIV/0!		#DIV/0!															#DIV/0!	#DIV/0!	#DIV/0!	#DIV/0!	#DIV/0!	#DIV/0!	#DIV/0!	#DIV/0!	#DIV/0!	#DIV/0!	#DIV/0!	#DIV/0!	#DIV/0!	0	0	0	0	0	0	#DIV/0!	#DIV/0!	#DIV/0!	#DIV/0!	#DIV/0!	#DIV/0!	#DIV/0!	0
						#DIV/0!		#DIV/0!															#DIV/0!	#DIV/0!	#DIV/0!	#DIV/0!	#DIV/0!	#DIV/0!	#DIV/0!	#DIV/0!	#DIV/0!	#DIV/0!	#DIV/0!	#DIV/0!	#DIV/0!	0	0	0	0	0	0	#DIV/0!	#DIV/0!	#DIV/0!	#DIV/0!	#DIV/0!	#DIV/0!	#DIV/0!	0
						#DIV/0!		#DIV/0!															#DIV/0!	#DIV/0!	#DIV/0!	#DIV/0!	#DIV/0!	#DIV/0!	#DIV/0!	#DIV/0!	#DIV/0!	#DIV/0!	#DIV/0!	#DIV/0!	#DIV/0!	0	0	0	0	0	0	#DIV/0!	#DIV/0!	#DIV/0!	#DIV/0!	#DIV/0!	#DIV/0!	#DIV/0!	0
						#DIV/0!		#DIV/0!															#DIV/0!	#DIV/0!	#DIV/0!	#DIV/0!	#DIV/0!	#DIV/0!	#DIV/0!	#DIV/0!	#DIV/0!	#DIV/0!	#DIV/0!	#DIV/0!	#DIV/0!	0	0	0	0	0	0	#DIV/0!	#DIV/0!	#DIV/0!	#DIV/0!	#DIV/0!	#DIV/0!	#DIV/0!	0
						#DIV/0!		#DIV/0!															#DIV/0!	#DIV/0!	#DIV/0!	#DIV/0!	#DIV/0!	#DIV/0!	#DIV/0!	#DIV/0!	#DIV/0!	#DIV/0!	#DIV/0!	#DIV/0!	#DIV/0!	0	0	0	0	0	0	#DIV/0!	#DIV/0!	#DIV/0!	#DIV/0!	#DIV/0!	#DIV/0!	#DIV/0!	0
						#DIV/0!		#DIV/0!															#DIV/0!	#DIV/0!	#DIV/0!	#DIV/0!	#DIV/0!	#DIV/0!	#DIV/0!	#DIV/0!	#DIV/0!	#DIV/0!	#DIV/0!	#DIV/0!	#DIV/0!	0	0	0	0	0	0	#DIV/0!	#DIV/0!	#DIV/0!	#DIV/0!	#DIV/0!	#DIV/0!	#DIV/0!	0
						#DIV/0!		#DIV/0!															#DIV/0!	#DIV/0!	#DIV/0!	#DIV/0!	#DIV/0!	#DIV/0!	#DIV/0!	#DIV/0!	#DIV/0!	#DIV/0!	#DIV/0!	#DIV/0!	#DIV/0!	0	0	0	0	0	0	#DIV/0!	#DIV/0!	#DIV/0!	#DIV/0!	#DIV/0!	#DIV/0!	#DIV/0!	0
						#DIV/0!		#DIV/0!															#DIV/0!	#DIV/0!	#DIV/0!	#DIV/0!	#DIV/0!	#DIV/0!	#DIV/0!	#DIV/0!	#DIV/0!	#DIV/0!	#DIV/0!	#DIV/0!	#DIV/0!	0	0	0	0	0	0	#DIV/0!	#DIV/0!	#DIV/0!	#DIV/0!	#DIV/0!	#DIV/0!	#DIV/0!	0
						#DIV/0!		#DIV/0!															#DIV/0!	#DIV/0!	#DIV/0!	#DIV/0!	#DIV/0!	#DIV/0!	#DIV/0!	#DIV/0!	#DIV/0!	#DIV/0!	#DIV/0!	#DIV/0!	#DIV/0!	0	0	0	0	0	0	#DIV/0!	#DIV/0!	#DIV/0!	#DIV/0!	#DIV/0!	#DIV/0!	#DIV/0!	0
						#DIV/0!		#DIV/0!															#DIV/0!	#DIV/0!	#DIV/0!	#DIV/0!	#DIV/0!	#DIV/0!	#DIV/0!	#DIV/0!	#DIV/0!	#DIV/0!	#DIV/0!	#DIV/0!	#DIV/0!	0	0	0	0	0	0	#DIV/0!	#DIV/0!	#DIV/0!	#DIV/0!	#DIV/0!	#DIV/0!	#DIV/0!	0
						#DIV/0!		#DIV/0!															#DIV/0!	#DIV/0!	#DIV/0!	#DIV/0!	#DIV/0!	#DIV/0!	#DIV/0!	#DIV/0!	#DIV/0!	#DIV/0!	#DIV/0!	#DIV/0!	#DIV/0!	0	0	0	0	0	0	#DIV/0!	#DIV/0!	#DIV/0!	#DIV/0!	#DIV/0!	#DIV/0!	#DIV/0!	0
						#DIV/0!		#DIV/0!															#DIV/0!	#DIV/0!	#DIV/0!	#DIV/0!	#DIV/0!	#DIV/0!	#DIV/0!	#DIV/0!	#DIV/0!	#DIV/0!	#DIV/0!	#DIV/0!	#DIV/0!	0	0	0	0	0	0	#DIV/0!	#DIV/0!	#DIV/0!	#DIV/0!	#DIV/0!	#DIV/0!	#DIV/0!	0
						#DIV/0!		#DIV/0!															#DIV/0!	#DIV/0!	#DIV/0!	#DIV/0!	#DIV/0!	#DIV/0!	#DIV/0!	#DIV/0!	#DIV/0!	#DIV/0!	#DIV/0!	#DIV/0!	#DIV/0!	0	0	0	0	0	0	#DIV/0!	#DIV/0!	#DIV/0!	#DIV/0!	#DIV/0!	#DIV/0!	#DIV/0!	0
						#DIV/0!		#DIV/0!
						#DIV/0!		#DIV/0!
						#DIV/0!		#DIV/0!
						#DIV/0!		#DIV/0!
						#DIV/0!		#DIV/0!
						#DIV/0!		#DIV/0!
						#DIV/0!		#DIV/0!
						#DIV/0!		#DIV/0!
						#DIV/0!		#DIV/0!
						#DIV/0!		#DIV/0!
						#DIV/0!		#DIV/0!
						#DIV/0!		#DIV/0!
						#DIV/0!		#DIV/0!
						#DIV/0!		#DIV/0!
						#DIV/0!		#DIV/0!
[truncated: 33 more columns]

## Sheet: Site4
Date:	16/8/2014
Site No. :	4v23
			Trans 1 including shrubs <0.5m						Trans 2 excluding shrubs >0.5m & Com mos, Gre bic, Mae par, Dic cin, Aca tor, Phy pin, Mae jun				Trans 3 for Gre lep, Gre fla, Col mop, Hip buc, Sec vir, Euc div, Dal mel, Pte bre
			Width (m)	Length (m)	Area (ha)			Length (m)	Width (m)	Length (m)	Area (ha)		Width (m)	Length (m)	Area (ha)
	Transect Dimensions:		5	50	0.025				25	50	0.125		50	50	0.25
	Co-ordinates:			X	Y			X		X	Y			X	Y
			NW Corner						NW Corner				NW Corner
			SW Corner						SW Corner				SW Corner
			NE Corner						NE Corner				NE Corner
			SE Corner						SE Corner				SE Corner
									OED		OUD	NED		NUD	NFD	OFD	OBE	OBU	NBE	NBU	RE	Notes	Canopy volume (m3)																				Damage
Trans. No.	Sp. Code	Coppice	Height (m)	D1 (m)	D2 (m)	R	Shape	Adj. shape	Score	Eaten		Score	Eaten										Total	0.5	1	2	3	4	5	0.5	1	2	3	4	5	OED	OUD	NED	NUD	NFD	OFD	Old Rec. Vol.	OED	OUD	NED	NUD	NFD	OFD	Sp. Code
1	Mae jun	T	0.25	0.24	0.14	0.095	3	3			1												0.00236038	0.00472075	0.0660905	0.81197	3.14402	7.96863	16.1922	0.00236038	0.00236038	0.00236038	0.00236038	0.00236038	0.00236038	0	5.5	0	0	0	0	0.00249775	0	0.0137376	0	0	0	0	Mae jun
1	Mae par	T	0.4	0.36	0.21	0.1425	2	2															0.00849736	0.0165964	0.132771	1.06217	3.58482	8.49736	16.5964	0.00849736	0.00849736	0.00849736	0.00849736	0.00849736	0.00849736	0	0	0	0	0	0	0.00849736	0	0	0	0	0	0	Mae par
1	Mae par	T	0.4	0.71	0.5	0.3025	3	3															0.0382917	0.03889	0.167526	2.48896	10.5542	27.953	58.2752	0.0382917	0.0382917	0.0382917	0.0382917	0.0382917	0.0382917	0	0	0	0	0	0	0.0382917	0	0	0	0	0	0	Mae par
1	Cad ter	T	0.4	0.15	0.02	0.0425	7	7						1									0.00218925	-0.000190741	-0.271798	-4.62431	-19.2866	-50.5357	-104.648	0.00218925	0.00218925	0.00218925	0.00218925	0.00218925	0.00218925	0	0	0	5.5	0	0	0.00218925	0	0	0	0.0127417	0	0	Cad ter
1	Mae par	T	0.2	0.24	0.25	0.1225	3	3						1									0.00313976	0.0137364	0.204084	2.29202	8.61864	21.5387	43.4072	0.00313976	0.00313976	0.00313976	0.00313976	0.00313976	0.00313976	0	0	0	5.5	0	0	0.00313976	0	0	0	0.0182737	0	0	Mae par
1	Gre bic	T	1.47	0.7	0.96	0.415	3	3	2														0.264855	0.188757	0.256198	0.277268	0.563482	1.61511	3.93244	0.188757	0.256198	0.264855	0.264855	0.264855	0.264855	18	0	0	0	0	0	0.322993	5.81388	0	0	0	0	0	Gre bic
1	Mae par	T	0.2	0.16	0.2	0.09	3	3															0.00169476	0.00741459	0.11016	1.23718	4.65213	11.6261	23.4301	0.00169476	0.00169476	0.00169476	0.00169476	0.00169476	0.00169476	0	0	0	0	0	0	0.00169476	0	0	0	0	0	0	Mae par
1	Cad ter	T	0.25	0.16	0.11	0.0675	3	3															0.00119163	0.00238326	0.0333657	0.409921	1.58725	4.02295	8.17459	0.00119163	0.00119163	0.00119163	0.00119163	0.00119163	0.00119163	0	0	0	0	0	0	0.00119163	0	0	0	0	0	0	Cad ter
1	Dic cin	T	0.4	0.61	0.49	0.275	2	2			2												0.031646	0.0618087	0.49447	3.95576	13.3507	31.646	61.8087	0.031646	0.031646	0.031646	0.031646	0.031646	0.031646	0	18	0	0	0	0	0.0385927	0	0.694669	0	0	0	0	Dic cin
1	Gre bic	T	1.8	2	1.9	0.95	4	4	3														3.58777	0.614613	1.93538	3.55691	-1.4123	-19.2492	-56.2306	0.614613	1.93538	3.58777	3.58777	3.58777	3.58777	38	0	0	0	0	0	5.78673	219.896	0	0	0	0	0	Gre bic
1	Gre bic	T	1.2	1.22	1.52	0.685	3	3	2														0.589056	0.472131	0.586329	0.763591	2.57712	8.07225	19.2943	0.472131	0.586329	0.589056	0.589056	0.589056	0.589056	18	0	0	0	0	0	0.718361	12.9305	0	0	0	0	0	Gre bic
1	Mae par	T	0.35	0.41	0.26	0.1675	3	3															0.0102729	0.0110815	0.0760731	1.08659	4.46915	11.6614	24.1008	0.0102729	0.0102729	0.0102729	0.0102729	0.0102729	0.0102729	0	0	0	0	0	0	0.0102729	0	0	0	0	0	0	Mae par
1	Mae par	T	0.25	0.25	0.12	0.0925	3	3															0.00223778	0.00447556	0.0626579	0.769797	2.98072	7.55475	15.3512	0.00223778	0.00223778	0.00223778	0.00223778	0.00223778	0.00223778	0	0	0	0	0	0	0.00223778	0	0	0	0	0	0	Mae par
1	Mae par	T	0.7	0.42	0.4	0.205	3	3															0.0307751	0.0300573	0.0331977	0.227897	1.12244	3.25517	7.16441	0.0300573	0.0307751	0.0307751	0.0307751	0.0307751	0.0307751	0	0	0	0	0	0	0.0307751	0	0	0	0	0	0	Mae par
1	Mae par	T	0.55	0.45	0.2	0.1625	3	3															0.0151937	0.0151823	0.0235154	0.2936	1.35819	3.76521	8.06259	0.0151823	0.0151937	0.0151937	0.0151937	0.0151937	0.0151937	0	0	0	0	0	0	0.0151937	0	0	0	0	0	0	Mae par
1	Mae par	T	0.4	1.61	0.64	0.5625	3	3															0.132403	0.134472	0.579265	8.60622	36.4937	96.6545	201.501	0.132403	0.132403	0.132403	0.132403	0.132403	0.132403	0	0	0	0	0	0	0.132403	0	0	0	0	0	0	Mae par
1	Mae par	T	0.2	0.3	0.21	0.1275	3	3															0.0034013	0.0148807	0.221084	2.48295	9.33656	23.3329	47.0229	0.0034013	0.0034013	0.0034013	0.0034013	0.0034013	0.0034013	0	0	0	0	0	0	0.0034013	0	0	0	0	0	0	Mae par
1	Mae par	T	0.61	0.54	0.24	0.195	3	3															0.0242657	0.0241234	0.0306073	0.311376	1.48374	4.18915	9.06903	0.0241234	0.0242657	0.0242657	0.0242657	0.0242657	0.0242657	0	0	0	0	0	0	0.0242657	0	0	0	0	0	0	Mae par
1	Mae par	T	0.4	0.1	0.1	0.05	7	7															0.00301043	0.000395055	-0.27945	-4.68374	-19.4449	-50.8399	-105.146	0.00301043	0.00301043	0.00301043	0.00301043	0.00301043	0.00301043	0	0	0	0	0	0	0.00301043	0	0	0	0	0	0	Mae par
1	Mae par	T	0.35	0.34	0.31	0.1625	3	3															0.00966872	0.0104298	0.0715993	1.02269	4.20632	10.9755	22.6834	0.00966872	0.00966872	0.00966872	0.00966872	0.00966872	0.00966872	0	0	0	0	0	0	0.00966872	0	0	0	0	0	0	Mae par
1	Gre bic	T	0.75	1.22	1.3	0.63	3	3			1												0.311413	0.299879	0.322947	1.75314	8.71956	25.6512	56.977	0.299879	0.311413	0.311413	0.311413	0.311413	0.311413	0	5.5	0	0	0	0	0.329537	0	1.81246	0	0	0	0	Gre bic
1	Mae par	T	0.2	0.03	0.02	0.075	7	6						1									0.000882689	-0.121942	-1.0285	-8.3339	-28.1931	-66.883	-130.681	0.000882689	-1.0285	0.000882689	0.000882689	0.000882689	0.000882689	0	0	0	5.5	0	0	0.000882689	0	0	0	0.00513735	0	0	Mae par
1	Gre bic	T	1.1	1.9	1.34	0.81	3	3			1	3											0.755017	0.63249	0.75445	1.16855	4.64582	14.5898	34.4041	0.63249	0.75445	0.755017	0.755017	0.755017	0.755017	0	5.5	38	0	0	0	0.79896	0	4.39428	46.2752	0	0	0	Gre bic
1	Gre bic	T	1.8	2.62	2.55	1.2925	3	3	3			2											3.14578	1.96072	2.8696	3.15009	4.07786	8.8893	20.8208	1.96072	2.8696	3.14578	3.14578	3.14578	3.14578	38	0	18	0	0	0	5.07383	192.806	0	69.0536	0	0	0	Gre bic
1	Dic cin	T	0.55	1	0.52	0.38	3	3															0.0830853	0.0830228	0.128592	1.60552	7.42711	20.5897	44.0895	0.0830228	0.0830853	0.0830853	0.0830853	0.0830853	0.0830853	0	0	0	0	0	0	0.0830853	0	0	0	0	0	0	Dic cin
1	Col mop	C	3	2.23	4.54	1.6925	1	1	4			1											26.9978	4.49963	8.99927	17.9985	26.9978	35.9971	44.9963	4.49963	8.99927	17.9985	26.9978	26.9978	26.9978	63	0	5.5	0	0	0	72.967	4596.92	0	157.13	0	0	0	Col mop
1	Dic cin	T	0.6	1.6	0.84	0.61	1	1			1												0.701392	0.584493	1.16899	2.33797	3.50696	4.67595	5.84493	0.584493	0.701392	0.701392	0.701392	0.701392	0.701392	0	5.5	0	0	0	0	0.742214	0	4.08218	0	0	0	0	Dic cin
1	Dic cin	T	1	0.62	0.41	0.2575	3	3															0.0693663	0.0606955	0.0693663	0.138733	0.624297	1.94226	4.50881	0.0606955	0.0693663	0.0693663	0.0693663	0.0693663	0.0693663	0	0	0	0	0	0	0.0693663	0	0	0	0	0	0	Dic cin
1	Mae par	T	0.6	0.41	0.25	0.165	3	3															0.0170889	0.0170098	0.0221522	0.234181	1.11078	3.12663	6.75643	0.0170098	0.0170889	0.0170889	0.0170889	0.0170889	0.0170889	0	0	0	0	0	0	0.0170889	0	0	0	0	0	0	Mae par
1	Col mop	T	0.1	0.1	0.1	0.05	3	3															0.000261538	0.0169999	0.190922	1.79415	6.3789	15.5144	30.7699	0.000261538	0.000261538	0.000261538	0.000261538	0.000261538	0.000261538	0	0	0	0	0	0	0.000261538	0	0	0	0	0	0	Col mop
1	Mae par	T	0.15	0.16	0.2	0.09	3	3				1											0.00127107	0.0174184	0.232559	2.38585	8.71956	21.4934	42.967	0.00127107	0.00127107	0.00127107	0.00127107	0.00127107	0.00127107	0	0	5.5	0	0	0	0.00127107	0	0	0.00739778	0	0	0	Mae par
1	Mae par	T	0.2	0.14	0.1	0.06	3	3			1												0.000753228	0.00329537	0.0489598	0.549857	2.06761	5.16715	10.4134	0.000753228	0.000753228	0.000753228	0.000753228	0.000753228	0.000753228	0	5.5	0	0	0	0	0.000797067	0	0.00438387	0	0	0	0	Mae par
1	Mae par	T	0.1	0.12	0.1	0.055	7	7			1												0.000775756	-0.0937962	-0.901686	-7.79791	-26.9655	-64.6813	-127.222	0.000775756	0.000775756	0.000775756	0.000775756	0.000775756	0.000775756	0	5.5	0	0	0	0	0.000820906	0	0.00451498	0	0	0	0	Mae par
1	Mae par	T	0.2	0.12	0.1	0.055	3	3			1												0.000632921	0.00276903	0.0411399	0.462032	1.73737	4.34184	8.75013	0.000632921	0.000632921	0.000632921	0.000632921	0.000632921	0.000632921	0	5.5	0	0	0	0	0.000669758	0	0.00368367	0	0	0	0	Mae par
1	Mae par	T	0.1	0.19	0.1	0.0725	3	3			1			1									0.000549883	0.0357424	0.401414	3.7722	13.4116	32.619	64.6937	0.000549883	0.000549883	0.000549883	0.000549883	0.000549883	0.000549883	0	5.5	0	5.5	0	0	0.000581887	0	0.00320038	0	0.00320038	0	0	Mae par
2	Com mos	T	0.8	0.41	0.29	0.175	7	7			2												0.0713455	0.0481056	0.0410071	-2.52729	-13.7263	-39.833	-87.1242	0.0481056	0.0713455	0.0713455	0.0713455	0.0713455	0.0713455	0	18	0	0	0	0	0.0870067	0	1.56612	0	0	0	0	Com mos
2	Gre bic	T	0.7	0.8	0.56	0.34	3	3	2														0.0846545	0.08268	0.0913183	0.626887	3.08754	8.95412	19.7075	0.08268	0.0846545	0.0846545	0.0846545	0.0846545	0.0846545	18	0	0	0	0	0	0.103237	1.85827	0	0	0	0	0	Gre bic
2	Mae par	T	0.7	0.51	0.34	0.2125	3	3			1												0.0330682	0.0322969	0.0356712	0.244878	1.20607	3.4977	7.69823	0.0322969	0.0330682	0.0330682	0.0330682	0.0330682	0.0330682	0	5.5	0	0	0	0	0.0349928	0	0.19246	0	0	0	0	Mae par
2	Mae par	T	0.7	0.55	0.29	0.21	3	3			1												0.0322947	0.0315414	0.0348368	0.23915	1.17786	3.41589	7.51816	0.0315414	0.0322947	0.0322947	0.0322947	0.0322947	0.0322947	0	5.5	0	0	0	0	0.0341742	0	0.187958	0	0	0	0	Mae par
2	Dic cin	T	0.65	0.68	0.52	0.3	3	3			1												0.0611998	0.0604477	0.0707544	0.609491	2.9533	8.43928	18.4045	0.0604477	0.0611998	0.0611998	0.0611998	0.0611998	0.0611998	0	5.5	0	0	0	0	0.0647617	0	0.356189	0	0	0	0	Dic cin
2	Dic cin	T	0.7	1.21	0.63	0.46	3	3			1												0.154956	0.151342	0.167153	1.14749	5.65159	16.3901	36.0735	0.151342	0.154956	0.154956	0.154956	0.154956	0.154956	0	5.5	0	0	0	0	0.163974	0	0.901859	0	0	0	0	Dic cin
2	Mae par	T	0.7	0.31	0.19	0.125	7	7			1												0.0323118	0.0245437	-0.0312419	-2.92908	-14.7715	-41.8354	-90.3977	0.0245437	0.0323118	0.0323118	0.0323118	0.0323118	0.0323118	0	5.5	0	0	0	0	0.0341924	0	0.188058	0	0	0	0	Mae par
2	Com mos	T	1	0.22	0.31	0.1325	7	7			2												0.0527137	0.0275773	0.0527137	-1.40928	-9.97987	-31.9359	-73.5544	0.0275773	0.0527137	0.0527137	0.0527137	0.0527137	0.0527137	0	18	0	0	0	0	0.064285	0	1.15713	0	0	0	0	Com mos
2	Mae par	T	0.9	0.7	0.6	0.325	3	3			1												0.0994497	0.0907188	0.0995861	0.281024	1.36283	4.16352	9.5016	0.0907188	0.0994497	0.0994497	0.0994497	0.0994497	0.0994497	0	5.5	0	0	0	0	0.105238	0	0.578808	0	0	0	0	Mae par
2	Col mop	C	0.17	2.2	1.25	0.8625	1	1	4														0.397299	1.16853	2.33705	4.6741	7.01115	9.3482	11.6853	0.397299	0.397299	0.397299	0.397299	0.397299	0.397299	63	0	0	0	0	0	1.07378	67.6481	0	0	0	0	0	Col mop
2	Col mop	T	2.2	1.2	1.18	0.595	3	3			2												0.814799	0.43885	0.682571	0.814187	0.853978	1.26107	2.4946	0.43885	0.682571	0.814187	0.814799	0.814799	0.814799	0	18	0	0	0	0	0.993658	0	17.8858	0	0	0	0	Col mop
2	Dic cin	T	1.1	1.02	0.83	0.4625	1	1			1												0.739207	0.336003	0.672006	1.34401	2.01602	2.68803	3.36003	0.336003	0.672006	0.739207	0.739207	0.739207	0.739207	0	5.5	0	0	0	0	0.78223	0	4.30226	0	0	0	0	Dic cin
2	Com mos	T	0.9	0.45	0.23	0.17	7	7			2												0.0765577	0.045396	0.0701761	-1.96145	-11.9647	-36.2166	-80.9939	0.045396	0.0765577	0.0765577	0.0765577	0.0765577	0.0765577	0	18	0	0	0	0	0.093363	0	1.68053	0	0	0	0	Com mos
2	Com mos	T	0.8	0.52	0.48	0.25	3	3			1												0.0523075	0.0495491	0.0531248	0.228845	1.14014	3.39999	7.62137	0.0495491	0.0523075	0.0523075	0.0523075	0.0523075	0.0523075	0	5.5	0	0	0	0	0.0553519	0	0.304435	0	0	0	0	Com mos
2	Com mos	T	0.7	0.22	0.14	0.09	7	7			2												0.0170479	0.0127235	-0.0366196	-2.7587	-14.2057	-40.6545	-88.3819	0.0127235	0.0170479	0.0170479	0.0170479	0.0170479	0.0170479	0	18	0	0	0	0	0.0207901	0	0.374222	0	0	0	0	Com mos
2	Aca tor	T	0.6	0.45	0.4	0.2125	3	3															0.0283441	0.0282129	0.0367424	0.38842	1.84237	5.18593	11.2064	0.0282129	0.0283441	0.0283441	0.0283441	0.0283441	0.0283441	0	0	0	0	0	0	0.0283441	0	0	0	0	0	0	Aca tor
2	Col mop	C	2.2	3.92	3.5	1.855	1	1	2														23.7827	5.40515	10.8103	21.6206	32.4309	43.2412	54.0515	5.40515	10.8103	21.6206	23.7827	23.7827	23.7827	18	0	0	0	0	0	29.0032	522.058	0	0	0	0	0	Col mop
2	Gre bic	T	0.9	0.71	1	0.4275	3	3	4			3											0.172071	0.156965	0.172308	0.486238	2.35802	7.20387	16.44	0.156965	0.172071	0.172071	0.172071	0.172071	0.172071	63	0	38	0	0	0	0.465058	29.2987	0	10.5463	0	0	0	Gre bic
2	Gre bic	T	1	0.52	1.3	0.455	3	3	4			4											0.216579	0.189507	0.216579	0.433159	1.94921	6.06422	14.0777	0.189507	0.216579	0.216579	0.216579	0.216579	0.216579	63	0	63	0	0	0	0.585349	36.877	0	36.877	0	0	0	Gre bic
2	Col mop	C	2.8	3.3	3.25	1.6375	2	2	2														7.85443	0.044725	0.3578	2.8624	9.66061	22.8992	44.725	0.044725	0.3578	2.8624	7.85443	7.85443	7.85443	18	0	0	0	0	0	9.57857	172.414	0	0	0	0	0	Col mop
2	Phy pin	T	0.55	0.21	0.2	0.1025	3	3			4												0.00604511	0.00604057	0.00935607	0.116815	0.540381	1.49806	3.20786	0.00604057	0.00604511	0.00604511	0.00604511	0.00604511	0.00604511	0	63	0	0	0	0	0.0163381	0	1.0293	0	0	0	0	Phy pin
2	Dal mel	T	0.9	0.7	0.82	0.38	3	3			1												0.135958	0.124022	0.136144	0.384188	1.86312	5.69195	12.9896	0.124022	0.135958	0.135958	0.135958	0.135958	0.135958	0	5.5	0	0	0	0	0.143871	0	0.791288	0	0	0	0	Dal mel
2	Dic cin	T	0.7	0.32	0.2	0.13	3	3			2												0.012376	0.0120873	0.0133502	0.091647	0.45138	1.30904	2.88111	0.0120873	0.012376	0.012376	0.012376	0.012376	0.012376	0	18	0	0	0	0	0.0150926	0	0.271667	0	0	0	0	Dic cin
2	Mae par	T	0.8	0.64	0.9	0.385	2	2															0.124053	0.0302863	0.24229	1.93832	6.54183	15.5066	30.2863	0.0302863	0.124053	0.124053	0.124053	0.124053	0.124053	0	0	0	0	0	0	0.124053	0	0	0	0	0	0	Mae par
3	Gre lep	T	0.7	1	0.9	0.475	2	2	4			3											0.165226	0.0602137	0.48171	3.85368	13.0062	30.8294	60.2137	0.0602137	0.165226	0.165226	0.165226	0.165226	0.165226	63	0	38	0	0	0	0.446558	28.1331	0	10.1268	0	0	0	Gre lep
3	Gre lep	T	0.3	0.3	0.12	0.105	3	3	4														0.00346014	0.00448537	0.0474168	0.633078	2.5259	6.49482	13.3087	0.00346014	0.00346014	0.00346014	0.00346014	0.00346014	0.00346014	63	0	0	0	0	0	0.00935174	0.589159	0	0	0	0	0	Gre lep
3	Gre lep	T	0.6	0.86	0.6	0.343333	4	4			1												0.169357	0.138615	0.0313845	-4.05906	-18.5482	-49.7131	-103.83	0.138615	0.169357	0.169357	0.169357	0.169357	0.169357	0	5.5	0	0	0	0	0.179213	0	0.985673	0	0	0	0	Gre lep
3	Gre fla	T	1.8	2.9	1.72	1.155	1	1	2														7.54373	2.09548	4.19096	8.38193	12.5729	16.7639	20.9548	2.09548	4.19096	7.54373	7.54373	7.54373	7.54373	18	0	0	0	0	0	9.19968	165.594	0	0	0	0	0	Gre fla
3	Col mop	C	0.9	1.12	1.21	0.5825	1	1			2												0.959366	0.532981	1.06596	2.13192	3.19789	4.26385	5.32981	0.532981	0.959366	0.959366	0.959366	0.959366	0.959366	0	18	0	0	0	0	1.16996	0	21.0592	0	0	0	0	Col mop
3	Col mop	C	1.1	0.85	1.07	0.48	3	3	2														0.265136	0.222109	0.264937	0.410354	1.63146	5.12345	12.0815	0.222109	0.264937	0.265136	0.265136	0.265136	0.265136	18	0	0	0	0	0	0.323337	5.82007	0	0	0	0	0	Col mop
3	Col mop	C	1.55	1.62	1.44	0.765	3	3															0.948962	0.653962	0.906564	0.972183	1.72585	4.69655	11.4133	0.653962	0.906564	0.948962	0.948962	0.948962	0.948962	0	0	0	0	0	0	0.948962	0	0	0	0	0	0	Col mop
3	Hip buc	T	0.9	0.27	0.25	0.13	7	7			2												0.0454783	0.0265465	0.0403522	-1.84063	-11.4422	-35.0413	-78.9147	0.0265465	0.0454783	0.0454783	0.0454783	0.0454783	0.0454783	0	18	0	0	0	0	0.0554614	0	0.998305	0	0	0	0	Hip buc
3	Col mop	C	2.3	2.9	1.64	1.135	3	3	4			1											3.09966	1.6139	2.53995	3.09278	3.18704	4.35129	8.11409	1.6139	2.53995	3.09278	3.09966	3.09966	3.09966	63	0	5.5	0	0	0	8.37745	527.779	0	18.0403	0	0	0	Col mop
3	Sec vir	T	1.55	2.1	1.5	0.9	3	3			1												1.31344	0.905138	1.25476	1.34558	2.38872	6.50041	15.7969	0.905138	1.25476	1.31344	1.31344	1.31344	1.31344	0	5.5	0	0	0	0	1.38989	0	7.64437	0	0	0	0	Sec vir
3	Col mop	C	2.45	4.05	2.28	1.5825	2	2	1														6.41871	0.0545581	0.436465	3.49172	11.7846	27.9338	54.5581	0.0545581	0.436465	3.49172	6.41871	6.41871	6.41871	5.5	0	0	0	0	0	6.79228	37.3576	0	0	0	0	0	Col mop
3	Euc div	T	0.6	0.44	0.4	0.21	3	3															0.0276811	0.027553	0.035883	0.379334	1.79927	5.06462	10.9443	0.027553	0.0276811	0.0276811	0.0276811	0.0276811	0.0276811	0	0	0	0	0	0	0.0276811	0	0	0	0	0	0	Euc div
3	Dal mel	T	1.25	0.7	0.45	0.2875	3	3			1												0.108089	0.0847414	0.107224	0.131436	0.404684	1.25902	3.02648	0.0847414	0.107224	0.108089	0.108089	0.108089	0.108089	0	5.5	0	0	0	0	0.114379	0	0.629087	0	0	0	0	Dal mel
3	Col mop	C	0.9	1.1	1.02	0.53	6	7			1												0.638011	0.438824	0.620331	-2.7671	-16.3859	-46.5129	-99.4251	0.438824	0.638011	0.638011	0.638011	0.638011	0.638011	0	5.5	0	0	0	0	0.675143	0	3.71329	0	0	0	0	Col mop
3	Col mop	C	1.2	1.98	1.1	0.77	1	1	4														2.23518	0.931325	1.86265	3.7253	5.58795	7.4506	9.31325	0.931325	1.86265	2.23518	2.23518	2.23518	2.23518	63	0	0	0	0	0	6.04103	380.585	0	0	0	0	0	Col mop
3	Pte bre	T	1.2	1.2	0.72	0.48	3	3	2														0.28924	0.231827	0.287901	0.37494	1.26542	3.96365	9.47394	0.231827	0.287901	0.28924	0.28924	0.28924	0.28924	18	0	0	0	0	0	0.352731	6.34916	0	0	0	0	0	Pte bre
						#DIV/0!		#DIV/0!															#DIV/0!	#DIV/0!	#DIV/0!	#DIV/0!	#DIV/0!	#DIV/0!	#DIV/0!	#DIV/0!	#DIV/0!	#DIV/0!	#DIV/0!	#DIV/0!	#DIV/0!	0	0	0	0	0	0	#DIV/0!	#DIV/0!	#DIV/0!	#DIV/0!	#DIV/0!	#DIV/0!	#DIV/0!	0
						#DIV/0!		#DIV/0!															#DIV/0!	#DIV/0!	#DIV/0!	#DIV/0!	#DIV/0!	#DIV/0!	#DIV/0!	#DIV/0!	#DIV/0!	#DIV/0!	#DIV/0!	#DIV/0!	#DIV/0!	0	0	0	0	0	0	#DIV/0!	#DIV/0!	#DIV/0!	#DIV/0!	#DIV/0!	#DIV/0!	#DIV/0!	0
						#DIV/0!		#DIV/0!															#DIV/0!	#DIV/0!	#DIV/0!	#DIV/0!	#DIV/0!	#DIV/0!	#DIV/0!	#DIV/0!	#DIV/0!	#DIV/0!	#DIV/0!	#DIV/0!	#DIV/0!	0	0	0	0	0	0	#DIV/0!	#DIV/0!	#DIV/0!	#DIV/0!	#DIV/0!	#DIV/0!	#DIV/0!	0
						#DIV/0!		#DIV/0!															#DIV/0!	#DIV/0!	#DIV/0!	#DIV/0!	#DIV/0!	#DIV/0!	#DIV/0!	#DIV/0!	#DIV/0!	#DIV/0!	#DIV/0!	#DIV/0!	#DIV/0!	0	0	0	0	0	0	#DIV/0!	#DIV/0!	#DIV/0!	#DIV/0!	#DIV/0!	#DIV/0!	#DIV/0!	0
						#DIV/0!		#DIV/0!															#DIV/0!	#DIV/0!	#DIV/0!	#DIV/0!	#DIV/0!	#DIV/0!	#DIV/0!	#DIV/0!	#DIV/0!	#DIV/0!	#DIV/0!	#DIV/0!	#DIV/0!	0	0	0	0	0	0	#DIV/0!	#DIV/0!	#DIV/0!	#DIV/0!	#DIV/0!	#DIV/0!	#DIV/0!	0
						#DIV/0!		#DIV/0!															#DIV/0!	#DIV/0!	#DIV/0!	#DIV/0!	#DIV/0!	#DIV/0!	#DIV/0!	#DIV/0!	#DIV/0!	#DIV/0!	#DIV/0!	#DIV/0!	#DIV/0!	0	0	0	0	0	0	#DIV/0!	#DIV/0!	#DIV/0!	#DIV/0!	#DIV/0!	#DIV/0!	#DIV/0!	0
						#DIV/0!		#DIV/0!															#DIV/0!	#DIV/0!	#DIV/0!	#DIV/0!	#DIV/0!	#DIV/0!	#DIV/0!	#DIV/0!	#DIV/0!	#DIV/0!	#DIV/0!	#DIV/0!	#DIV/0!	0	0	0	0	0	0	#DIV/0!	#DIV/0!	#DIV/0!	#DIV/0!	#DIV/0!	#DIV/0!	#DIV/0!	0
						#DIV/0!		#DIV/0!															#DIV/0!	#DIV/0!	#DIV/0!	#DIV/0!	#DIV/0!	#DIV/0!	#DIV/0!	#DIV/0!	#DIV/0!	#DIV/0!	#DIV/0!	#DIV/0!	#DIV/0!	0	0	0	0	0	0	#DIV/0!	#DIV/0!	#DIV/0!	#DIV/0!	#DIV/0!	#DIV/0!	#DIV/0!	0
						#DIV/0!		#DIV/0!															#DIV/0!	#DIV/0!	#DIV/0!	#DIV/0!	#DIV/0!	#DIV/0!	#DIV/0!	#DIV/0!	#DIV/0!	#DIV/0!	#DIV/0!	#DIV/0!	#DIV/0!	0	0	0	0	0	0	#DIV/0!	#DIV/0!	#DIV/0!	#DIV/0!	#DIV/0!	#DIV/0!	#DIV/0!	0
						#DIV/0!		#DIV/0!															#DIV/0!	#DIV/0!	#DIV/0!	#DIV/0!	#DIV/0!	#DIV/0!	#DIV/0!	#DIV/0!	#DIV/0!	#DIV/0!	#DIV/0!	#DIV/0!	#DIV/0!	0	0	0	0	0	0	#DIV/0!	#DIV/0!	#DIV/0!	#DIV/0!	#DIV/0!	#DIV/0!	#DIV/0!	0
						#DIV/0!		#DIV/0!															#DIV/0!	#DIV/0!	#DIV/0!	#DIV/0!	#DIV/0!	#DIV/0!	#DIV/0!	#DIV/0!	#DIV/0!	#DIV/0!	#DIV/0!	#DIV/0!	#DIV/0!	0	0	0	0	0	0	#DIV/0!	#DIV/0!	#DIV/0!	#DIV/0!	#DIV/0!	#DIV/0!	#DIV/0!	0
						#DIV/0!		#DIV/0!															#DIV/0!	#DIV/0!	#DIV/0!	#DIV/0!	#DIV/0!	#DIV/0!	#DIV/0!	#DIV/0!	#DIV/0!	#DIV/0!	#DIV/0!	#DIV/0!	#DIV/0!	0	0	0	0	0	0	#DIV/0!	#DIV/0!	#DIV/0!	#DIV/0!	#DIV/0!	#DIV/0!	#DIV/0!	0
						#DIV/0!		#DIV/0!															#DIV/0!	#DIV/0!	#DIV/0!	#DIV/0!	#DIV/0!	#DIV/0!	#DIV/0!	#DIV/0!	#DIV/0!	#DIV/0!	#DIV/0!	#DIV/0!	#DIV/0!	0	0	0	0	0	0	#DIV/0!	#DIV/0!	#DIV/0!	#DIV/0!	#DIV/0!	#DIV/0!	#DIV/0!	0
						#DIV/0!		#DIV/0!															#DIV/0!	#DIV/0!	#DIV/0!	#DIV/0!	#DIV/0!	#DIV/0!	#DIV/0!	#DIV/0!	#DIV/0!	#DIV/0!	#DIV/0!	#DIV/0!	#DIV/0!	0	0	0	0	0	0	#DIV/0!	#DIV/0!	#DIV/0!	#DIV/0!	#DIV/0!	#DIV/0!	#DIV/0!	0
						#DIV/0!		#DIV/0!															#DIV/0!	#DIV/0!	#DIV/0!	#DIV/0!	#DIV/0!	#DIV/0!	#DIV/0!	#DIV/0!	#DIV/0!	#DIV/0!	#DIV/0!	#DIV/0!	#DIV/0!	0	0	0	0	0	0	#DIV/0!	#DIV/0!	#DIV/0!	#DIV/0!	#DIV/0!	#DIV/0!	#DIV/0!	0
						#DIV/0!		#DIV/0!															#DIV/0!	#DIV/0!	#DIV/0!	#DIV/0!	#DIV/0!	#DIV/0!	#DIV/0!	#DIV/0!	#DIV/0!	#DIV/0!	#DIV/0!	#DIV/0!	#DIV/0!	0	0	0	0	0	0	#DIV/0!	#DIV/0!	#DIV/0!	#DIV/0!	#DIV/0!	#DIV/0!	#DIV/0!	0
						#DIV/0!		#DIV/0!															#DIV/0!	#DIV/0!	#DIV/0!	#DIV/0!	#DIV/0!	#DIV/0!	#DIV/0!	#DIV/0!	#DIV/0!	#DIV/0!	#DIV/0!	#DIV/0!	#DIV/0!	0	0	0	0	0	0	#DIV/0!	#DIV/0!	#DIV/0!	#DIV/0!	#DIV/0!	#DIV/0!	#DIV/0!	0
						#DIV/0!		#DIV/0!															#DIV/0!	#DIV/0!	#DIV/0!	#DIV/0!	#DIV/0!	#DIV/0!	#DIV/0!	#DIV/0!	#DIV/0!	#DIV/0!	#DIV/0!	#DIV/0!	#DIV/0!	0	0	0	0	0	0	#DIV/0!	#DIV/0!	#DIV/0!	#DIV/0!	#DIV/0!	#DIV/0!	#DIV/0!	0
						#DIV/0!		#DIV/0!															#DIV/0!	#DIV/0!	#DIV/0!	#DIV/0!	#DIV/0!	#DIV/0!	#DIV/0!	#DIV/0!	#DIV/0!	#DIV/0!	#DIV/0!	#DIV/0!	#DIV/0!	0	0	0	0	0	0	#DIV/0!	#DIV/0!	#DIV/0!	#DIV/0!	#DIV/0!	#DIV/0!	#DIV/0!	0
						#DIV/0!		#DIV/0!															#DIV/0!	#DIV/0!	#DIV/0!	#DIV/0!	#DIV/0!	#DIV/0!	#DIV/0!	#DIV/0!	#DIV/0!	#DIV/0!	#DIV/0!	#DIV/0!	#DIV/0!	0	0	0	0	0	0	#DIV/0!	#DIV/0!	#DIV/0!	#DIV/0!	#DIV/0!	#DIV/0!	#DIV/0!	0
						#DIV/0!		#DIV/0!															#DIV/0!	#DIV/0!	#DIV/0!	#DIV/0!	#DIV/0!	#DIV/0!	#DIV/0!	#DIV/0!	#DIV/0!	#DIV/0!	#DIV/0!	#DIV/0!	#DIV/0!	0	0	0	0	0	0	#DIV/0!	#DIV/0!	#DIV/0!	#DIV/0!	#DIV/0!	#DIV/0!	#DIV/0!	0
						#DIV/0!		#DIV/0!															#DIV/0!	#DIV/0!	#DIV/0!	#DIV/0!	#DIV/0!	#DIV/0!	#DIV/0!	#DIV/0!	#DIV/0!	#DIV/0!	#DIV/0!	#DIV/0!	#DIV/0!	0	0	0	0	0	0	#DIV/0!	#DIV/0!	#DIV/0!	#DIV/0!	#DIV/0!	#DIV/0!	#DIV/0!	0
						#DIV/0!		#DIV/0!															#DIV/0!	#DIV/0!	#DIV/0!	#DIV/0!	#DIV/0!	#DIV/0!	#DIV/0!	#DIV/0!	#DIV/0!	#DIV/0!	#DIV/0!	#DIV/0!	#DIV/0!	0	0	0	0	0	0	#DIV/0!	#DIV/0!	#DIV/0!	#DIV/0!	#DIV/0!	#DIV/0!	#DIV/0!	0
						#DIV/0!		#DIV/0!															#DIV/0!	#DIV/0!	#DIV/0!	#DIV/0!	#DIV/0!	#DIV/0!	#DIV/0!	#DIV/0!	#DIV/0!	#DIV/0!	#DIV/0!	#DIV/0!	#DIV/0!	0	0	0	0	0	0	#DIV/0!	#DIV/0!	#DIV/0!	#DIV/0!	#DIV/0!	#DIV/0!	#DIV/0!	0
						#DIV/0!		#DIV/0!															#DIV/0!	#DIV/0!	#DIV/0!	#DIV/0!	#DIV/0!	#DIV/0!	#DIV/0!	#DIV/0!	#DIV/0!	#DIV/0!	#DIV/0!	#DIV/0!	#DIV/0!	0	0	0	0	0	0	#DIV/0!	#DIV/0!	#DIV/0!	#DIV/0!	#DIV/0!	#DIV/0!	#DIV/0!	0
						#DIV/0!		#DIV/0!															#DIV/0!	#DIV/0!	#DIV/0!	#DIV/0!	#DIV/0!	#DIV/0!	#DIV/0!	#DIV/0!	#DIV/0!	#DIV/0!	#DIV/0!	#DIV/0!	#DIV/0!	0	0	0	0	0	0	#DIV/0!	#DIV/0!	#DIV/0!	#DIV/0!	#DIV/0!	#DIV/0!	#DIV/0!	0
						#DIV/0!		#DIV/0!															#DIV/0!	#DIV/0!	#DIV/0!	#DIV/0!	#DIV/0!	#DIV/0!	#DIV/0!	#DIV/0!	#DIV/0!	#DIV/0!	#DIV/0!	#DIV/0!	#DIV/0!	0	0	0	0	0	0	#DIV/0!	#DIV/0!	#DIV/0!	#DIV/0!	#DIV/0!	#DIV/0!	#DIV/0!	0
						#DIV/0!		#DIV/0!															#DIV/0!	#DIV/0!	#DIV/0!	#DIV/0!	#DIV/0!	#DIV/0!	#DIV/0!	#DIV/0!	#DIV/0!	#DIV/0!	#DIV/0!	#DIV/0!	#DIV/0!	0	0	0	0	0	0	#DIV/0!	#DIV/0!	#DIV/0!	#DIV/0!	#DIV/0!	#DIV/0!	#DIV/0!	0
						#DIV/0!		#DIV/0!															#DIV/0!	#DIV/0!	#DIV/0!	#DIV/0!	#DIV/0!	#DIV/0!	#DIV/0!	#DIV/0!	#DIV/0!	#DIV/0!	#DIV/0!	#DIV/0!	#DIV/0!	0	0	0	0	0	0	#DIV/0!	#DIV/0!	#DIV/0!	#DIV/0!	#DIV/0!	#DIV/0!	#DIV/0!	0
						#DIV/0!		#DIV/0!															#DIV/0!	#DIV/0!	#DIV/0!	#DIV/0!	#DIV/0!	#DIV/0!	#DIV/0!	#DIV/0!	#DIV/0!	#DIV/0!	#DIV/0!	#DIV/0!	#DIV/0!	0	0	0	0	0	0	#DIV/0!	#DIV/0!	#DIV/0!	#DIV/0!	#DIV/0!	#DIV/0!	#DIV/0!	0
						#DIV/0!		#DIV/0!															#DIV/0!	#DIV/0!	#DIV/0!	#DIV/0!	#DIV/0!	#DIV/0!	#DIV/0!	#DIV/0!	#DIV/0!	#DIV/0!	#DIV/0!	#DIV/0!	#DIV/0!	0	0	0	0	0	0	#DIV/0!	#DIV/0!	#DIV/0!	#DIV/0!	#DIV/0!	#DIV/0!	#DIV/0!	0
						#DIV/0!		#DIV/0!															#DIV/0!	#DIV/0!	#DIV/0!	#DIV/0!	#DIV/0!	#DIV/0!	#DIV/0!	#DIV/0!	#DIV/0!	#DIV/0!	#DIV/0!	#DIV/0!	#DIV/0!	0	0	0	0	0	0	#DIV/0!	#DIV/0!	#DIV/0!	#DIV/0!	#DIV/0!	#DIV/0!	#DIV/0!	0
						#DIV/0!		#DIV/0!															#DIV/0!	#DIV/0!	#DIV/0!	#DIV/0!	#DIV/0!	#DIV/0!	#DIV/0!	#DIV/0!	#DIV/0!	#DIV/0!	#DIV/0!	#DIV/0!	#DIV/0!	0	0	0	0	0	0	#DIV/0!	#DIV/0!	#DIV/0!	#DIV/0!	#DIV/0!	#DIV/0!	#DIV/0!	0
						#DIV/0!		#DIV/0!															#DIV/0!	#DIV/0!	#DIV/0!	#DIV/0!	#DIV/0!	#DIV/0!	#DIV/0!	#DIV/0!	#DIV/0!	#DIV/0!	#DIV/0!	#DIV/0!	#DIV/0!	0	0	0	0	0	0	#DIV/0!	#DIV/0!	#DIV/0!	#DIV/0!	#DIV/0!	#DIV/0!	#DIV/0!	0
						#DIV/0!		#DIV/0!															#DIV/0!	#DIV/0!	#DIV/0!	#DIV/0!	#DIV/0!	#DIV/0!	#DIV/0!	#DIV/0!	#DIV/0!	#DIV/0!	#DIV/0!	#DIV/0!	#DIV/0!	0	0	0	0	0	0	#DIV/0!	#DIV/0!	#DIV/0!	#DIV/0!	#DIV/0!	#DIV/0!	#DIV/0!	0
						#DIV/0!		#DIV/0!															#DIV/0!	#DIV/0!	#DIV/0!	#DIV/0!	#DIV/0!	#DIV/0!	#DIV/0!	#DIV/0!	#DIV/0!	#DIV/0!	#DIV/0!	#DIV/0!	#DIV/0!	0	0	0	0	0	0	#DIV/0!	#DIV/0!	#DIV/0!	#DIV/0!	#DIV/0!	#DIV/0!	#DIV/0!	0
						#DIV/0!		#DIV/0!															#DIV/0!	#DIV/0!	#DIV/0!	#DIV/0!	#DIV/0!	#DIV/0!	#DIV/0!	#DIV/0!	#DIV/0!	#DIV/0!	#DIV/0!	#DIV/0!	#DIV/0!	0	0	0	0	0	0	#DIV/0!	#DIV/0!	#DIV/0!	#DIV/0!	#DIV/0!	#DIV/0!	#DIV/0!	0
						#DIV/0!		#DIV/0!															#DIV/0!	#DIV/0!	#DIV/0!	#DIV/0!	#DIV/0!	#DIV/0!	#DIV/0!	#DIV/0!	#DIV/0!	#DIV/0!	#DIV/0!	#DIV/0!	#DIV/0!	0	0	0	0	0	0	#DIV/0!	#DIV/0!	#DIV/0!	#DIV/0!	#DIV/0!	#DIV/0!	#DIV/0!	0
						#DIV/0!		#DIV/0!															#DIV/0!	#DIV/0!	#DIV/0!	#DIV/0!	#DIV/0!	#DIV/0!	#DIV/0!	#DIV/0!	#DIV/0!	#DIV/0!	#DIV/0!	#DIV/0!	#DIV/0!	0	0	0	0	0	0	#DIV/0!	#DIV/0!	#DIV/0!	#DIV/0!	#DIV/0!	#DIV/0!	#DIV/0!	0
						#DIV/0!		#DIV/0!															#DIV/0!	#DIV/0!	#DIV/0!	#DIV/0!	#DIV/0!	#DIV/0!	#DIV/0!	#DIV/0!	#DIV/0!	#DIV/0!	#DIV/0!	#DIV/0!	#DIV/0!	0	0	0	0	0	0	#DIV/0!	#DIV/0!	#DIV/0!	#DIV/0!	#DIV/0!	#DIV/0!	#DIV/0!	0
						#DIV/0!		#DIV/0!															#DIV/0!	#DIV/0!	#DIV/0!	#DIV/0!	#DIV/0!	#DIV/0!	#DIV/0!	#DIV/0!	#DIV/0!	#DIV/0!	#DIV/0!	#DIV/0!	#DIV/0!	0	0	0	0	0	0	#DIV/0!	#DIV/0!	#DIV/0!	#DIV/0!	#DIV/0!	#DIV/0!	#DIV/0!	0
						#DIV/0!		#DIV/0!															#DIV/0!	#DIV/0!	#DIV/0!	#DIV/0!	#DIV/0!	#DIV/0!	#DIV/0!	#DIV/0!	#DIV/0!	#DIV/0!	#DIV/0!	#DIV/0!	#DIV/0!	0	0	0	0	0	0	#DIV/0!	#DIV/0!	#DIV/0!	#DIV/0!	#DIV/0!	#DIV/0!	#DIV/0!	0
						#DIV/0!		#DIV/0!															#DIV/0!	#DIV/0!	#DIV/0!	#DIV/0!	#DIV/0!	#DIV/0!	#DIV/0!	#DIV/0!	#DIV/0!	#DIV/0!	#DIV/0!	#DIV/0!	#DIV/0!	0	0	0	0	0	0	#DIV/0!	#DIV/0!	#DIV/0!	#DIV/0!	#DIV/0!	#DIV/0!	#DIV/0!	0
						#DIV/0!		#DIV/0!															#DIV/0!	#DIV/0!	#DIV/0!	#DIV/0!	#DIV/0!	#DIV/0!	#DIV/0!	#DIV/0!	#DIV/0!	#DIV/0!	#DIV/0!	#DIV/0!	#DIV/0!	0	0	0	0	0	0	#DIV/0!	#DIV/0!	#DIV/0!	#DIV/0!	#DIV/0!	#DIV/0!	#DIV/0!	0
						#DIV/0!		#DIV/0!															#DIV/0!	#DIV/0!	#DIV/0!	#DIV/0!	#DIV/0!	#DIV/0!	#DIV/0!	#DIV/0!	#DIV/0!	#DIV/0!	#DIV/0!	#DIV/0!	#DIV/0!	0	0	0	0	0	0	#DIV/0!	#DIV/0!	#DIV/0!	#DIV/0!	#DIV/0!	#DIV/0!	#DIV/0!	0
						#DIV/0!		#DIV/0!															#DIV/0!	#DIV/0!	#DIV/0!	#DIV/0!	#DIV/0!	#DIV/0!	#DIV/0!	#DIV/0!	#DIV/0!	#DIV/0!	#DIV/0!	#DIV/0!	#DIV/0!	0	0	0	0	0	0	#DIV/0!	#DIV/0!	#DIV/0!	#DIV/0!	#DIV/0!	#DIV/0!	#DIV/0!	0
						#DIV/0!		#DIV/0!															#DIV/0!	#DIV/0!	#DIV/0!	#DIV/0!	#DIV/0!	#DIV/0!	#DIV/0!	#DIV/0!	#DIV/0!	#DIV/0!	#DIV/0!	#DIV/0!	#DIV/0!	0	0	0	0	0	0	#DIV/0!	#DIV/0!	#DIV/0!	#DIV/0!	#DIV/0!	#DIV/0!	#DIV/0!	0
						#DIV/0!		#DIV/0!															#DIV/0!	#DIV/0!	#DIV/0!	#DIV/0!	#DIV/0!	#DIV/0!	#DIV/0!	#DIV/0!	#DIV/0!	#DIV/0!	#DIV/0!	#DIV/0!	#DIV/0!	0	0	0	0	0	0	#DIV/0!	#DIV/0!	#DIV/0!	#DIV/0!	#DIV/0!	#DIV/0!	#DIV/0!	0
						#DIV/0!		#DIV/0!															#DIV/0!	#DIV/0!	#DIV/0!	#DIV/0!	#DIV/0!	#DIV/0!	#DIV/0!	#DIV/0!	#DIV/0!	#DIV/0!	#DIV/0!	#DIV/0!	#DIV/0!	0	0	0	0	0	0	#DIV/0!	#DIV/0!	#DIV/0!	#DIV/0!	#DIV/0!	#DIV/0!	#DIV/0!	0
						#DIV/0!		#DIV/0!															#DIV/0!	#DIV/0!	#DIV/0!	#DIV/0!	#DIV/0!	#DIV/0!	#DIV/0!	#DIV/0!	#DIV/0!	#DIV/0!	#DIV/0!	#DIV/0!	#DIV/0!	0	0	0	0	0	0	#DIV/0!	#DIV/0!	#DIV/0!	#DIV/0!	#DIV/0!	#DIV/0!	#DIV/0!	0
						#DIV/0!		#DIV/0!															#DIV/0!	#DIV/0!	#DIV/0!	#DIV/0!	#DIV/0!	#DIV/0!	#DIV/0!	#DIV/0!	#DIV/0!	#DIV/0!	#DIV/0!	#DIV/0!	#DIV/0!	0	0	0	0	0	0	#DIV/0!	#DIV/0!	#DIV/0!	#DIV/0!	#DIV/0!	#DIV/0!	#DIV/0!	0
						#DIV/0!		#DIV/0!															#DIV/0!	#DIV/0!	#DIV/0!	#DIV/0!	#DIV/0!	#DIV/0!	#DIV/0!	#DIV/0!	#DIV/0!	#DIV/0!	#DIV/0!	#DIV/0!	#DIV/0!	0	0	0	0	0	0	#DIV/0!	#DIV/0!	#DIV/0!	#DIV/0!	#DIV/0!	#DIV/0!	#DIV/0!	0
						#DIV/0!		#DIV/0!															#DIV/0!	#DIV/0!	#DIV/0!	#DIV/0!	#DIV/0!	#DIV/0!	#DIV/0!	#DIV/0!	#DIV/0!	#DIV/0!	#DIV/0!	#DIV/0!	#DIV/0!	0	0	0	0	0	0	#DIV/0!	#DIV/0!	#DIV/0!	#DIV/0!	#DIV/0!	#DIV/0!	#DIV/0!	0
						#DIV/0!		#DIV/0!															#DIV/0!	#DIV/0!	#DIV/0!	#DIV/0!	#DIV/0!	#DIV/0!	#DIV/0!	#DIV/0!	#DIV/0!	#DIV/0!	#DIV/0!	#DIV/0!	#DIV/0!	0	0	0	0	0	0	#DIV/0!	#DIV/0!	#DIV/0!	#DIV/0!	#DIV/0!	#DIV/0!	#DIV/0!	0
						#DIV/0!		#DIV/0!															#DIV/0!	#DIV/0!	#DIV/0!	#DIV/0!	#DIV/0!	#DIV/0!	#DIV/0!	#DIV/0!	#DIV/0!	#DIV/0!	#DIV/0!	#DIV/0!	#DIV/0!	0	0	0	0	0	0	#DIV/0!	#DIV/0!	#DIV/0!	#DIV/0!	#DIV/0!	#DIV/0!	#DIV/0!	0
						#DIV/0!		#DIV/0!															#DIV/0!	#DIV/0!	#DIV/0!	#DIV/0!	#DIV/0!	#DIV/0!	#DIV/0!	#DIV/0!	#DIV/0!	#DIV/0!	#DIV/0!	#DIV/0!	#DIV/0!	0	0	0	0	0	0	#DIV/0!	#DIV/0!	#DIV/0!	#DIV/0!	#DIV/0!	#DIV/0!	#DIV/0!	0
						#DIV/0!		#DIV/0!															#DIV/0!	#DIV/0!	#DIV/0!	#DIV/0!	#DIV/0!	#DIV/0!	#DIV/0!	#DIV/0!	#DIV/0!	#DIV/0!	#DIV/0!	#DIV/0!	#DIV/0!	0	0	0	0	0	0	#DIV/0!	#DIV/0!	#DIV/0!	#DIV/0!	#DIV/0!	#DIV/0!	#DIV/0!	0
						#DIV/0!		#DIV/0!															#DIV/0!	#DIV/0!	#DIV/0!	#DIV/0!	#DIV/0!	#DIV/0!	#DIV/0!	#DIV/0!	#DIV/0!	#DIV/0!	#DIV/0!	#DIV/0!	#DIV/0!	0	0	0	0	0	0	#DIV/0!	#DIV/0!	#DIV/0!	#DIV/0!	#DIV/0!	#DIV/0!	#DIV/0!	0
						#DIV/0!		#DIV/0!															#DIV/0!	#DIV/0!	#DIV/0!	#DIV/0!	#DIV/0!	#DIV/0!	#DIV/0!	#DIV/0!	#DIV/0!	#DIV/0!	#DIV/0!	#DIV/0!	#DIV/0!	0	0	0	0	0	0	#DIV/0!	#DIV/0!	#DIV/0!	#DIV/0!	#DIV/0!	#DIV/0!	#DIV/0!	0
						#DIV/0!		#DIV/0!															#DIV/0!	#DIV/0!	#DIV/0!	#DIV/0!	#DIV/0!	#DIV/0!	#DIV/0!	#DIV/0!	#DIV/0!	#DIV/0!	#DIV/0!	#DIV/0!	#DIV/0!	0	0	0	0	0	0	#DIV/0!	#DIV/0!	#DIV/0!	#DIV/0!	#DIV/0!	#DIV/0!	#DIV/0!	0
						#DIV/0!		#DIV/0!															#DIV/0!	#DIV/0!	#DIV/0!	#DIV/0!	#DIV/0!	#DIV/0!	#DIV/0!	#DIV/0!	#DIV/0!	#DIV/0!	#DIV/0!	#DIV/0!	#DIV/0!	0	0	0	0	0	0	#DIV/0!	#DIV/0!	#DIV/0!	#DIV/0!	#DIV/0!	#DIV/0!	#DIV/0!	0
						#DIV/0!		#DIV/0!															#DIV/0!	#DIV/0!	#DIV/0!	#DIV/0!	#DIV/0!	#DIV/0!	#DIV/0!	#DIV/0!	#DIV/0!	#DIV/0!	#DIV/0!	#DIV/0!	#DIV/0!	0	0	0	0	0	0	#DIV/0!	#DIV/0!	#DIV/0!	#DIV/0!	#DIV/0!	#DIV/0!	#DIV/0!	0
						#DIV/0!		#DIV/0!															#DIV/0!	#DIV/0!	#DIV/0!	#DIV/0!	#DIV/0!	#DIV/0!	#DIV/0!	#DIV/0!	#DIV/0!	#DIV/0!	#DIV/0!	#DIV/0!	#DIV/0!	0	0	0	0	0	0	#DIV/0!	#DIV/0!	#DIV/0!	#DIV/0!	#DIV/0!	#DIV/0!	#DIV/0!	0
						#DIV/0!		#DIV/0!															#DIV/0!	#DIV/0!	#DIV/0!	#DIV/0!	#DIV/0!	#DIV/0!	#DIV/0!	#DIV/0!	#DIV/0!	#DIV/0!	#DIV/0!	#DIV/0!	#DIV/0!	0	0	0	0	0	0	#DIV/0!	#DIV/0!	#DIV/0!	#DIV/0!	#DIV/0!	#DIV/0!	#DIV/0!	0
						#DIV/0!		#DIV/0!															#DIV/0!	#DIV/0!	#DIV/0!	#DIV/0!	#DIV/0!	#DIV/0!	#DIV/0!	#DIV/0!	#DIV/0!	#DIV/0!	#DIV/0!	#DIV/0!	#DIV/0!	0	0	0	0	0	0	#DIV/0!	#DIV/0!	#DIV/0!	#DIV/0!	#DIV/0!	#DIV/0!	#DIV/0!	0
						#DIV/0!		#DIV/0!															#DIV/0!	#DIV/0!	#DIV/0!	#DIV/0!	#DIV/0!	#DIV/0!	#DIV/0!	#DIV/0!	#DIV/0!	#DIV/0!	#DIV/0!	#DIV/0!	#DIV/0!	0	0	0	0	0	0	#DIV/0!	#DIV/0!	#DIV/0!	#DIV/0!	#DIV/0!	#DIV/0!	#DIV/0!	0
						#DIV/0!		#DIV/0!															#DIV/0!	#DIV/0!	#DIV/0!	#DIV/0!	#DIV/0!	#DIV/0!	#DIV/0!	#DIV/0!	#DIV/0!	#DIV/0!	#DIV/0!	#DIV/0!	#DIV/0!	0	0	0	0	0	0	#DIV/0!	#DIV/0!	#DIV/0!	#DIV/0!	#DIV/0!	#DIV/0!	#DIV/0!	0
						#DIV/0!		#DIV/0!															#DIV/0!	#DIV/0!	#DIV/0!	#DIV/0!	#DIV/0!	#DIV/0!	#DIV/0!	#DIV/0!	#DIV/0!	#DIV/0!	#DIV/0!	#DIV/0!	#DIV/0!	0	0	0	0	0	0	#DIV/0!	#DIV/0!	#DIV/0!	#DIV/0!	#DIV/0!	#DIV/0!	#DIV/0!	0
						#DIV/0!		#DIV/0!															#DIV/0!	#DIV/0!	#DIV/0!	#DIV/0!	#DIV/0!	#DIV/0!	#DIV/0!	#DIV/0!	#DIV/0!	#DIV/0!	#DIV/0!	#DIV/0!	#DIV/0!	0	0	0	0	0	0	#DIV/0!	#DIV/0!	#DIV/0!	#DIV/0!	#DIV/0!	#DIV/0!	#DIV/0!	0
						#DIV/0!		#DIV/0!															#DIV/0!	#DIV/0!	#DIV/0!	#DIV/0!	#DIV/0!	#DIV/0!	#DIV/0!	#DIV/0!	#DIV/0!	#DIV/0!	#DIV/0!	#DIV/0!	#DIV/0!	0	0	0	0	0	0	#DIV/0!	#DIV/0!	#DIV/0!	#DIV/0!	#DIV/0!	#DIV/0!	#DIV/0!	0
						#DIV/0!		#DIV/0!															#DIV/0!	#DIV/0!	#DIV/0!	#DIV/0!	#DIV/0!	#DIV/0!	#DIV/0!	#DIV/0!	#DIV/0!	#DIV/0!	#DIV/0!	#DIV/0!	#DIV/0!	0	0	0	0	0	0	#DIV/0!	#DIV/0!	#DIV/0!	#DIV/0!	#DIV/0!	#DIV/0!	#DIV/0!	0
						#DIV/0!		#DIV/0!															#DIV/0!	#DIV/0!	#DIV/0!	#DIV/0!	#DIV/0!	#DIV/0!	#DIV/0!	#DIV/0!	#DIV/0!	#DIV/0!	#DIV/0!	#DIV/0!	#DIV/0!	0	0	0	0	0	0	#DIV/0!	#DIV/0!	#DIV/0!	#DIV/0!	#DIV/0!	#DIV/0!	#DIV/0!	0
						#DIV/0!		#DIV/0!															#DIV/0!	#DIV/0!	#DIV/0!	#DIV/0!	#DIV/0!	#DIV/0!	#DIV/0!	#DIV/0!	#DIV/0!	#DIV/0!	#DIV/0!	#DIV/0!	#DIV/0!	0	0	0	0	0	0	#DIV/0!	#DIV/0!	#DIV/0!	#DIV/0!	#DIV/0!	#DIV/0!	#DIV/0!	0
						#DIV/0!		#DIV/0!															#DIV/0!	#DIV/0!	#DIV/0!	#DIV/0!	#DIV/0!	#DIV/0!	#DIV/0!	#DIV/0!	#DIV/0!	#DIV/0!	#DIV/0!	#DIV/0!	#DIV/0!	0	0	0	0	0	0	#DIV/0!	#DIV/0!	#DIV/0!	#DIV/0!	#DIV/0!	#DIV/0!	#DIV/0!	0
						#DIV/0!		#DIV/0!															#DIV/0!	#DIV/0!	#DIV/0!	#DIV/0!	#DIV/0!	#DIV/0!	#DIV/0!	#DIV/0!	#DIV/0!	#DIV/0!	#DIV/0!	#DIV/0!	#DIV/0!	0	0	0	0	0	0	#DIV/0!	#DIV/0!	#DIV/0!	#DIV/0!	#DIV/0!	#DIV/0!	#DIV/0!	0
						#DIV/0!		#DIV/0!															#DIV/0!	#DIV/0!	#DIV/0!	#DIV/0!	#DIV/0!	#DIV/0!	#DIV/0!	#DIV/0!	#DIV/0!	#DIV/0!	#DIV/0!	#DIV/0!	#DIV/0!	0	0	0	0	0	0	#DIV/0!	#DIV/0!	#DIV/0!	#DIV/0!	#DIV/0!	#DIV/0!	#DIV/0!	0
						#DIV/0!		#DIV/0!															#DIV/0!	#DIV/0!	#DIV/0!	#DIV/0!	#DIV/0!	#DIV/0!	#DIV/0!	#DIV/0!	#DIV/0!	#DIV/0!	#DIV/0!	#DIV/0!	#DIV/0!	0	0	0	0	0	0	#DIV/0!	#DIV/0!	#DIV/0!	#DIV/0!	#DIV/0!	#DIV/0!	#DIV/0!	0
						#DIV/0!		#DIV/0!															#DIV/0!	#DIV/0!	#DIV/0!	#DIV/0!	#DIV/0!	#DIV/0!	#DIV/0!	#DIV/0!	#DIV/0!	#DIV/0!	#DIV/0!	#DIV/0!	#DIV/0!	0	0	0	0	0	0	#DIV/0!	#DIV/0!	#DIV/0!	#DIV/0!	#DIV/0!	#DIV/0!	#DIV/0!	0
						#DIV/0!		#DIV/0!															#DIV/0!	#DIV/0!	#DIV/0!	#DIV/0!	#DIV/0!	#DIV/0!	#DIV/0!	#DIV/0!	#DIV/0!	#DIV/0!	#DIV/0!	#DIV/0!	#DIV/0!	0	0	0	0	0	0	#DIV/0!	#DIV/0!	#DIV/0!	#DIV/0!	#DIV/0!	#DIV/0!	#DIV/0!	0
						#DIV/0!		#DIV/0!															#DIV/0!	#DIV/0!	#DIV/0!	#DIV/0!	#DIV/0!	#DIV/0!	#DIV/0!	#DIV/0!	#DIV/0!	#DIV/0!	#DIV/0!	#DIV/0!	#DIV/0!	0	0	0	0	0	0	#DIV/0!	#DIV/0!	#DIV/0!	#DIV/0!	#DIV/0!	#DIV/0!	#DIV/0!	0
						#DIV/0!		#DIV/0!															#DIV/0!	#DIV/0!	#DIV/0!	#DIV/0!	#DIV/0!	#DIV/0!	#DIV/0!	#DIV/0!	#DIV/0!	#DIV/0!	#DIV/0!	#DIV/0!	#DIV/0!	0	0	0	0	0	0	#DIV/0!	#DIV/0!	#DIV/0!	#DIV/0!	#DIV/0!	#DIV/0!	#DIV/0!	0
						#DIV/0!		#DIV/0!															#DIV/0!	#DIV/0!	#DIV/0!	#DIV/0!	#DIV/0!	#DIV/0!	#DIV/0!	#DIV/0!	#DIV/0!	#DIV/0!	#DIV/0!	#DIV/0!	#DIV/0!	0	0	0	0	0	0	#DIV/0!	#DIV/0!	#DIV/0!	#DIV/0!	#DIV/0!	#DIV/0!	#DIV/0!	0
						#DIV/0!		#DIV/0!															#DIV/0!	#DIV/0!	#DIV/0!	#DIV/0!	#DIV/0!	#DIV/0!	#DIV/0!	#DIV/0!	#DIV/0!	#DIV/0!	#DIV/0!	#DIV/0!	#DIV/0!	0	0	0	0	0	0	#DIV/0!	#DIV/0!	#DIV/0!	#DIV/0!	#DIV/0!	#DIV/0!	#DIV/0!	0
						#DIV/0!		#DIV/0!															#DIV/0!	#DIV/0!	#DIV/0!	#DIV/0!	#DIV/0!	#DIV/0!	#DIV/0!	#DIV/0!	#DIV/0!	#DIV/0!	#DIV/0!	#DIV/0!	#DIV/0!	0	0	0	0	0	0	#DIV/0!	#DIV/0!	#DIV/0!	#DIV/0!	#DIV/0!	#DIV/0!	#DIV/0!	0
						#DIV/0!		#DIV/0!															#DIV/0!	#DIV/0!	#DIV/0!	#DIV/0!	#DIV/0!	#DIV/0!	#DIV/0!	#DIV/0!	#DIV/0!	#DIV/0!	#DIV/0!	#DIV/0!	#DIV/0!	0	0	0	0	0	0	#DIV/0!	#DIV/0!	#DIV/0!	#DIV/0!	#DIV/0!	#DIV/0!	#DIV/0!	0
						#DIV/0!		#DIV/0!															#DIV/0!	#DIV/0!	#DIV/0!	#DIV/0!	#DIV/0!	#DIV/0!	#DIV/0!	#DIV/0!	#DIV/0!	#DIV/0!	#DIV/0!	#DIV/0!	#DIV/0!	0	0	0	0	0	0	#DIV/0!	#DIV/0!	#DIV/0!	#DIV/0!	#DIV/0!	#DIV/0!	#DIV/0!	0
						#DIV/0!		#DIV/0!															#DIV/0!	#DIV/0!	#DIV/0!	#DIV/0!	#DIV/0!	#DIV/0!	#DIV/0!	#DIV/0!	#DIV/0!	#DIV/0!	#DIV/0!	#DIV/0!	#DIV/0!	0	0	0	0	0	0	#DIV/0!	#DIV/0!	#DIV/0!	#DIV/0!	#DIV/0!	#DIV/0!	#DIV/0!	0
						#DIV/0!		#DIV/0!															#DIV/0!	#DIV/0!	#DIV/0!	#DIV/0!	#DIV/0!	#DIV/0!	#DIV/0!	#DIV/0!	#DIV/0!	#DIV/0!	#DIV/0!	#DIV/0!	#DIV/0!	0	0	0	0	0	0	#DIV/0!	#DIV/0!	#DIV/0!	#DIV/0!	#DIV/0!	#DIV/0!	#DIV/0!	0
						#DIV/0!		#DIV/0!															#DIV/0!	#DIV/0!	#DIV/0!	#DIV/0!	#DIV/0!	#DIV/0!	#DIV/0!	#DIV/0!	#DIV/0!	#DIV/0!	#DIV/0!	#DIV/0!	#DIV/0!	0	0	0	0	0	0	#DIV/0!	#DIV/0!	#DIV/0!	#DIV/0!	#DIV/0!	#DIV/0!	#DIV/0!	0
						#DIV/0!		#DIV/0!															#DIV/0!	#DIV/0!	#DIV/0!	#DIV/0!	#DIV/0!	#DIV/0!	#DIV/0!	#DIV/0!	#DIV/0!	#DIV/0!	#DIV/0!	#DIV/0!	#DIV/0!	0	0	0	0	0	0	#DIV/0!	#DIV/0!	#DIV/0!	#DIV/0!	#DIV/0!	#DIV/0!	#DIV/0!	0
						#DIV/0!		#DIV/0!															#DIV/0!	#DIV/0!	#DIV/0!	#DIV/0!	#DIV/0!	#DIV/0!	#DIV/0!	#DIV/0!	#DIV/0!	#DIV/0!	#DIV/0!	#DIV/0!	#DIV/0!	0	0	0	0	0	0	#DIV/0!	#DIV/0!	#DIV/0!	#DIV/0!	#DIV/0!	#DIV/0!	#DIV/0!	0
						#DIV/0!		#DIV/0!															#DIV/0!	#DIV/0!	#DIV/0!	#DIV/0!	#DIV/0!	#DIV/0!	#DIV/0!	#DIV/0!	#DIV/0!	#DIV/0!	#DIV/0!	#DIV/0!	#DIV/0!	0	0	0	0	0	0	#DIV/0!	#DIV/0!	#DIV/0!	#DIV/0!	#DIV/0!	#DIV/0!	#DIV/0!	0
						#DIV/0!		#DIV/0!															#DIV/0!	#DIV/0!	#DIV/0!	#DIV/0!	#DIV/0!	#DIV/0!	#DIV/0!	#DIV/0!	#DIV/0!	#DIV/0!	#DIV/0!	#DIV/0!	#DIV/0!	0	0	0	0	0	0	#DIV/0!	#DIV/0!	#DIV/0!	#DIV/0!	#DIV/0!	#DIV/0!	#DIV/0!	0
						#DIV/0!		#DIV/0!															#DIV/0!	#DIV/0!	#DIV/0!	#DIV/0!	#DIV/0!	#DIV/0!	#DIV/0!	#DIV/0!	#DIV/0!	#DIV/0!	#DIV/0!	#DIV/0!	#DIV/0!	0	0	0	0	0	0	#DIV/0!	#DIV/0!	#DIV/0!	#DIV/0!	#DIV/0!	#DIV/0!	#DIV/0!	0
						#DIV/0!		#DIV/0!															#DIV/0!	#DIV/0!	#DIV/0!	#DIV/0!	#DIV/0!	#DIV/0!	#DIV/0!	#DIV/0!	#DIV/0!	#DIV/0!	#DIV/0!	#DIV/0!	#DIV/0!	0	0	0	0	0	0	#DIV/0!	#DIV/0!	#DIV/0!	#DIV/0!	#DIV/0!	#DIV/0!	#DIV/0!	0
						#DIV/0!		#DIV/0!															#DIV/0!	#DIV/0!	#DIV/0!	#DIV/0!	#DIV/0!	#DIV/0!	#DIV/0!	#DIV/0!	#DIV/0!	#DIV/0!	#DIV/0!	#DIV/0!	#DIV/0!	0	0	0	0	0	0	#DIV/0!	#DIV/0!	#DIV/0!	#DIV/0!	#DIV/0!	#DIV/0!	#DIV/0!	0
						#DIV/0!		#DIV/0!															#DIV/0!	#DIV/0!	#DIV/0!	#DIV/0!	#DIV/0!	#DIV/0!	#DIV/0!	#DIV/0!	#DIV/0!	#DIV/0!	#DIV/0!	#DIV/0!	#DIV/0!	0	0	0	0	0	0	#DIV/0!	#DIV/0!	#DIV/0!	#DIV/0!	#DIV/0!	#DIV/0!	#DIV/0!	0
						#DIV/0!		#DIV/0!															#DIV/0!	#DIV/0!	#DIV/0!	#DIV/0!	#DIV/0!	#DIV/0!	#DIV/0!	#DIV/0!	#DIV/0!	#DIV/0!	#DIV/0!	#DIV/0!	#DIV/0!	0	0	0	0	0	0	#DIV/0!	#DIV/0!	#DIV/0!	#DIV/0!	#DIV/0!	#DIV/0!	#DIV/0!	0
						#DIV/0!		#DIV/0!															#DIV/0!	#DIV/0!	#DIV/0!	#DIV/0!	#DIV/0!	#DIV/0!	#DIV/0!	#DIV/0!	#DIV/0!	#DIV/0!	#DIV/0!	#DIV/0!	#DIV/0!	0	0	0	0	0	0	#DIV/0!	#DIV/0!	#DIV/0!	#DIV/0!	#DIV/0!	#DIV/0!	#DIV/0!	0
						#DIV/0!		#DIV/0!															#DIV/0!	#DIV/0!	#DIV/0!	#DIV/0!	#DIV/0!	#DIV/0!	#DIV/0!	#DIV/0!	#DIV/0!	#DIV/0!	#DIV/0!	#DIV/0!	#DIV/0!	0	0	0	0	0	0	#DIV/0!	#DIV/0!	#DIV/0!	#DIV/0!	#DIV/0!	#DIV/0!	#DIV/0!	0
						#DIV/0!		#DIV/0!															#DIV/0!	#DIV/0!	#DIV/0!	#DIV/0!	#DIV/0!	#DIV/0!	#DIV/0!	#DIV/0!	#DIV/0!	#DIV/0!	#DIV/0!	#DIV/0!	#DIV/0!	0	0	0	0	0	0	#DIV/0!	#DIV/0!	#DIV/0!	#DIV/0!	#DIV/0!	#DIV/0!	#DIV/0!	0
						#DIV/0!		#DIV/0!															#DIV/0!	#DIV/0!	#DIV/0!	#DIV/0!	#DIV/0!	#DIV/0!	#DIV/0!	#DIV/0!	#DIV/0!	#DIV/0!	#DIV/0!	#DIV/0!	#DIV/0!	0	0	0	0	0	0	#DIV/0!	#DIV/0!	#DIV/0!	#DIV/0!	#DIV/0!	#DIV/0!	#DIV/0!	0
						#DIV/0!		#DIV/0!															#DIV/0!	#DIV/0!	#DIV/0!	#DIV/0!	#DIV/0!	#DIV/0!	#DIV/0!	#DIV/0!	#DIV/0!	#DIV/0!	#DIV/0!	#DIV/0!	#DIV/0!	0	0	0	0	0	0	#DIV/0!	#DIV/0!	#DIV/0!	#DIV/0!	#DIV/0!	#DIV/0!	#DIV/0!	0
						#DIV/0!		#DIV/0!															#DIV/0!	#DIV/0!	#DIV/0!	#DIV/0!	#DIV/0!	#DIV/0!	#DIV/0!	#DIV/0!	#DIV/0!	#DIV/0!	#DIV/0!	#DIV/0!	#DIV/0!	0	0	0	0	0	0	#DIV/0!	#DIV/0!	#DIV/0!	#DIV/0!	#DIV/0!	#DIV/0!	#DIV/0!	0
						#DIV/0!		#DIV/0!															#DIV/0!	#DIV/0!	#DIV/0!	#DIV/0!	#DIV/0!	#DIV/0!	#DIV/0!	#DIV/0!	#DIV/0!	#DIV/0!	#DIV/0!	#DIV/0!	#DIV/0!	0	0	0	0	0	0	#DIV/0!	#DIV/0!	#DIV/0!	#DIV/0!	#DIV/0!	#DIV/0!	#DIV/0!	0
						#DIV/0!		#DIV/0!															#DIV/0!	#DIV/0!	#DIV/0!	#DIV/0!	#DIV/0!	#DIV/0!	#DIV/0!	#DIV/0!	#DIV/0!	#DIV/0!	#DIV/0!	#DIV/0!	#DIV/0!	0	0	0	0	0	0	#DIV/0!	#DIV/0!	#DIV/0!	#DIV/0!	#DIV/0!	#DIV/0!	#DIV/0!	0
						#DIV/0!		#DIV/0!															#DIV/0!	#DIV/0!	#DIV/0!	#DIV/0!	#DIV/0!	#DIV/0!	#DIV/0!	#DIV/0!	#DIV/0!	#DIV/0!	#DIV/0!	#DIV/0!	#DIV/0!	0	0	0	0	0	0	#DIV/0!	#DIV/0!	#DIV/0!	#DIV/0!	#DIV/0!	#DIV/0!	#DIV/0!	0
						#DIV/0!		#DIV/0!															#DIV/0!	#DIV/0!	#DIV/0!	#DIV/0!	#DIV/0!	#DIV/0!	#DIV/0!	#DIV/0!	#DIV/0!	#DIV/0!	#DIV/0!	#DIV/0!	#DIV/0!	0	0	0	0	0	0	#DIV/0!	#DIV/0!	#DIV/0!	#DIV/0!	#DIV/0!	#DIV/0!	#DIV/0!	0
						#DIV/0!		#DIV/0!															#DIV/0!	#DIV/0!	#DIV/0!	#DIV/0!	#DIV/0!	#DIV/0!	#DIV/0!	#DIV/0!	#DIV/0!	#DIV/0!	#DIV/0!	#DIV/0!	#DIV/0!	0	0	0	0	0	0	#DIV/0!	#DIV/0!	#DIV/0!	#DIV/0!	#DIV/0!	#DIV/0!	#DIV/0!	0
						#DIV/0!		#DIV/0!															#DIV/0!	#DIV/0!	#DIV/0!	#DIV/0!	#DIV/0!	#DIV/0!	#DIV/0!	#DIV/0!	#DIV/0!	#DIV/0!	#DIV/0!	#DIV/0!	#DIV/0!	0	0	0	0	0	0	#DIV/0!	#DIV/0!	#DIV/0!	#DIV/0!	#DIV/0!	#DIV/0!	#DIV/0!	0
						#DIV/0!		#DIV/0!															#DIV/0!	#DIV/0!	#DIV/0!	#DIV/0!	#DIV/0!	#DIV/0!	#DIV/0!	#DIV/0!	#DIV/0!	#DIV/0!	#DIV/0!	#DIV/0!	#DIV/0!	0	0	0	0	0	0	#DIV/0!	#DIV/0!	#DIV/0!	#DIV/0!	#DIV/0!	#DIV/0!	#DIV/0!	0
						#DIV/0!		#DIV/0!															#DIV/0!	#DIV/0!	#DIV/0!	#DIV/0!	#DIV/0!	#DIV/0!	#DIV/0!	#DIV/0!	#DIV/0!	#DIV/0!	#DIV/0!	#DIV/0!	#DIV/0!	0	0	0	0	0	0	#DIV/0!	#DIV/0!	#DIV/0!	#DIV/0!	#DIV/0!	#DIV/0!	#DIV/0!	0
						#DIV/0!		#DIV/0!															#DIV/0!	#DIV/0!	#DIV/0!	#DIV/0!	#DIV/0!	#DIV/0!	#DIV/0!	#DIV/0!	#DIV/0!	#DIV/0!	#DIV/0!	#DIV/0!	#DIV/0!	0	0	0	0	0	0	#DIV/0!	#DIV/0!	#DIV/0!	#DIV/0!	#DIV/0!	#DIV/0!	#DIV/0!	0
						#DIV/0!		#DIV/0!															#DIV/0!	#DIV/0!	#DIV/0!	#DIV/0!	#DIV/0!	#DIV/0!	#DIV/0!	#DIV/0!	#DIV/0!	#DIV/0!	#DIV/0!	#DIV/0!	#DIV/0!	0	0	0	0	0	0	#DIV/0!	#DIV/0!	#DIV/0!	#DIV/0!	#DIV/0!	#DIV/0!	#DIV/0!	0
						#DIV/0!		#DIV/0!															#DIV/0!	#DIV/0!	#DIV/0!	#DIV/0!	#DIV/0!	#DIV/0!	#DIV/0!	#DIV/0!	#DIV/0!	#DIV/0!	#DIV/0!	#DIV/0!	#DIV/0!	0	0	0	0	0	0	#DIV/0!	#DIV/0!	#DIV/0!	#DIV/0!	#DIV/0!	#DIV/0!	#DIV/0!	0
						#DIV/0!		#DIV/0!															#DIV/0!	#DIV/0!	#DIV/0!	#DIV/0!	#DIV/0!	#DIV/0!	#DIV/0!	#DIV/0!	#DIV/0!	#DIV/0!	#DIV/0!	#DIV/0!	#DIV/0!	0	0	0	0	0	0	#DIV/0!	#DIV/0!	#DIV/0!	#DIV/0!	#DIV/0!	#DIV/0!	#DIV/0!	0
						#DIV/0!		#DIV/0!															#DIV/0!	#DIV/0!	#DIV/0!	#DIV/0!	#DIV/0!	#DIV/0!	#DIV/0!	#DIV/0!	#DIV/0!	#DIV/0!	#DIV/0!	#DIV/0!	#DIV/0!	0	0	0	0	0	0	#DIV/0!	#DIV/0!	#DIV/0!	#DIV/0!	#DIV/0!	#DIV/0!	#DIV/0!	0
						#DIV/0!		#DIV/0!															#DIV/0!	#DIV/0!	#DIV/0!	#DIV/0!	#DIV/0!	#DIV/0!	#DIV/0!	#DIV/0!	#DIV/0!	#DIV/0!	#DIV/0!	#DIV/0!	#DIV/0!	0	0	0	0	0	0	#DIV/0!	#DIV/0!	#DIV/0!	#DIV/0!	#DIV/0!	#DIV/0!	#DIV/0!	0
						#DIV/0!		#DIV/0!															#DIV/0!	#DIV/0!	#DIV/0!	#DIV/0!	#DIV/0!	#DIV/0!	#DIV/0!	#DIV/0!	#DIV/0!	#DIV/0!	#DIV/0!	#DIV/0!	#DIV/0!	0	0	0	0	0	0	#DIV/0!	#DIV/0!	#DIV/0!	#DIV/0!	#DIV/0!	#DIV/0!	#DIV/0!	0
						#DIV/0!		#DIV/0!															#DIV/0!	#DIV/0!	#DIV/0!	#DIV/0!	#DIV/0!	#DIV/0!	#DIV/0!	#DIV/0!	#DIV/0!	#DIV/0!	#DIV/0!	#DIV/0!	#DIV/0!	0	0	0	0	0	0	#DIV/0!	#DIV/0!	#DIV/0!	#DIV/0!	#DIV/0!	#DIV/0!	#DIV/0!	0
						#DIV/0!		#DIV/0!															#DIV/0!	#DIV/0!	#DIV/0!	#DIV/0!	#DIV/0!	#DIV/0!	#DIV/0!	#DIV/0!	#DIV/0!	#DIV/0!	#DIV/0!	#DIV/0!	#DIV/0!	0	0	0	0	0	0	#DIV/0!	#DIV/0!	#DIV/0!	#DIV/0!	#DIV/0!	#DIV/0!	#DIV/0!	0
						#DIV/0!		#DIV/0!															#DIV/0!	#DIV/0!	#DIV/0!	#DIV/0!	#DIV/0!	#DIV/0!	#DIV/0!	#DIV/0!	#DIV/0!	#DIV/0!	#DIV/0!	#DIV/0!	#DIV/0!	0	0	0	0	0	0	#DIV/0!	#DIV/0!	#DIV/0!	#DIV/0!	#DIV/0!	#DIV/0!	#DIV/0!	0
						#DIV/0!		#DIV/0!															#DIV/0!	#DIV/0!	#DIV/0!	#DIV/0!	#DIV/0!	#DIV/0!	#DIV/0!	#DIV/0!	#DIV/0!	#DIV/0!	#DIV/0!	#DIV/0!	#DIV/0!	0	0	0	0	0	0	#DIV/0!	#DIV/0!	#DIV/0!	#DIV/0!	#DIV/0!	#DIV/0!	#DIV/0!	0
						#DIV/0!		#DIV/0!															#DIV/0!	#DIV/0!	#DIV/0!	#DIV/0!	#DIV/0!	#DIV/0!	#DIV/0!	#DIV/0!	#DIV/0!	#DIV/0!	#DIV/0!	#DIV/0!	#DIV/0!	0	0	0	0	0	0	#DIV/0!	#DIV/0!	#DIV/0!	#DIV/0!	#DIV/0!	#DIV/0!	#DIV/0!	0
						#DIV/0!		#DIV/0!															#DIV/0!	#DIV/0!	#DIV/0!	#DIV/0!	#DIV/0!	#DIV/0!	#DIV/0!	#DIV/0!	#DIV/0!	#DIV/0!	#DIV/0!	#DIV/0!	#DIV/0!	0	0	0	0	0	0	#DIV/0!	#DIV/0!	#DIV/0!	#DIV/0!	#DIV/0!	#DIV/0!	#DIV/0!	0
						#DIV/0!		#DIV/0!															#DIV/0!	#DIV/0!	#DIV/0!	#DIV/0!	#DIV/0!	#DIV/0!	#DIV/0!	#DIV/0!	#DIV/0!	#DIV/0!	#DIV/0!	#DIV/0!	#DIV/0!	0	0	0	0	0	0	#DIV/0!	#DIV/0!	#DIV/0!	#DIV/0!	#DIV/0!	#DIV/0!	#DIV/0!	0
						#DIV/0!		#DIV/0!															#DIV/0!	#DIV/0!	#DIV/0!	#DIV/0!	#DIV/0!	#DIV/0!	#DIV/0!	#DIV/0!	#DIV/0!	#DIV/0!	#DIV/0!	#DIV/0!	#DIV/0!	0	0	0	0	0	0	#DIV/0!	#DIV/0!	#DIV/0!	#DIV/0!	#DIV/0!	#DIV/0!	#DIV/0!	0
						#DIV/0!		#DIV/0!															#DIV/0!	#DIV/0!	#DIV/0!	#DIV/0!	#DIV/0!	#DIV/0!	#DIV/0!	#DIV/0!	#DIV/0!	#DIV/0!	#DIV/0!	#DIV/0!	#DIV/0!	0	0	0	0	0	0	#DIV/0!	#DIV/0!	#DIV/0!	#DIV/0!	#DIV/0!	#DIV/0!	#DIV/0!	0
						#DIV/0!		#DIV/0!															#DIV/0!	#DIV/0!	#DIV/0!	#DIV/0!	#DIV/0!	#DIV/0!	#DIV/0!	#DIV/0!	#DIV/0!	#DIV/0!	#DIV/0!	#DIV/0!	#DIV/0!	0	0	0	0	0	0	#DIV/0!	#DIV/0!	#DIV/0!	#DIV/0!	#DIV/0!	#DIV/0!	#DIV/0!	0
						#DIV/0!		#DIV/0!															#DIV/0!	#DIV/0!	#DIV/0!	#DIV/0!	#DIV/0!	#DIV/0!	#DIV/0!	#DIV/0!	#DIV/0!	#DIV/0!	#DIV/0!	#DIV/0!	#DIV/0!	0	0	0	0	0	0	#DIV/0!	#DIV/0!	#DIV/0!	#DIV/0!	#DIV/0!	#DIV/0!	#DIV/0!	0
						#DIV/0!		#DIV/0!															#DIV/0!	#DIV/0!	#DIV/0!	#DIV/0!	#DIV/0!	#DIV/0!	#DIV/0!	#DIV/0!	#DIV/0!	#DIV/0!	#DIV/0!	#DIV/0!	#DIV/0!	0	0	0	0	0	0	#DIV/0!	#DIV/0!	#DIV/0!	#DIV/0!	#DIV/0!	#DIV/0!	#DIV/0!	0
						#DIV/0!		#DIV/0!															#DIV/0!	#DIV/0!	#DIV/0!	#DIV/0!	#DIV/0!	#DIV/0!	#DIV/0!	#DIV/0!	#DIV/0!	#DIV/0!	#DIV/0!	#DIV/0!	#DIV/0!	0	0	0	0	0	0	#DIV/0!	#DIV/0!	#DIV/0!	#DIV/0!	#DIV/0!	#DIV/0!	#DIV/0!	0
						#DIV/0!		#DIV/0!															#DIV/0!	#DIV/0!	#DIV/0!	#DIV/0!	#DIV/0!	#DIV/0!	#DIV/0!	#DIV/0!	#DIV/0!	#DIV/0!	#DIV/0!	#DIV/0!	#DIV/0!	0	0	0	0	0	0	#DIV/0!	#DIV/0!	#DIV/0!	#DIV/0!	#DIV/0!	#DIV/0!	#DIV/0!	0
						#DIV/0!		#DIV/0!															#DIV/0!	#DIV/0!	#DIV/0!	#DIV/0!	#DIV/0!	#DIV/0!	#DIV/0!	#DIV/0!	#DIV/0!	#DIV/0!	#DIV/0!	#DIV/0!	#DIV/0!	0	0	0	0	0	0	#DIV/0!	#DIV/0!	#DIV/0!	#DIV/0!	#DIV/0!	#DIV/0!	#DIV/0!	0
						#DIV/0!		#DIV/0!															#DIV/0!	#DIV/0!	#DIV/0!	#DIV/0!	#DIV/0!	#DIV/0!	#DIV/0!	#DIV/0!	#DIV/0!	#DIV/0!	#DIV/0!	#DIV/0!	#DIV/0!	0	0	0	0	0	0	#DIV/0!	#DIV/0!	#DIV/0!	#DIV/0!	#DIV/0!	#DIV/0!	#DIV/0!	0
						#DIV/0!		#DIV/0!															#DIV/0!	#DIV/0!	#DIV/0!	#DIV/0!	#DIV/0!	#DIV/0!	#DIV/0!	#DIV/0!	#DIV/0!	#DIV/0!	#DIV/0!	#DIV/0!	#DIV/0!	0	0	0	0	0	0	#DIV/0!	#DIV/0!	#DIV/0!	#DIV/0!	#DIV/0!	#DIV/0!	#DIV/0!	0
						#DIV/0!		#DIV/0!															#DIV/0!	#DIV/0!	#DIV/0!	#DIV/0!	#DIV/0!	#DIV/0!	#DIV/0!	#DIV/0!	#DIV/0!	#DIV/0!	#DIV/0!	#DIV/0!	#DIV/0!	0	0	0	0	0	0	#DIV/0!	#DIV/0!	#DIV/0!	#DIV/0!	#DIV/0!	#DIV/0!	#DIV/0!	0
						#DIV/0!		#DIV/0!															#DIV/0!	#DIV/0!	#DIV/0!	#DIV/0!	#DIV/0!	#DIV/0!	#DIV/0!	#DIV/0!	#DIV/0!	#DIV/0!	#DIV/0!	#DIV/0!	#DIV/0!	0	0	0	0	0	0	#DIV/0!	#DIV/0!	#DIV/0!	#DIV/0!	#DIV/0!	#DIV/0!	#DIV/0!	0
						#DIV/0!		#DIV/0!															#DIV/0!	#DIV/0!	#DIV/0!	#DIV/0!	#DIV/0!	#DIV/0!	#DIV/0!	#DIV/0!	#DIV/0!	#DIV/0!	#DIV/0!	#DIV/0!	#DIV/0!	0	0	0	0	0	0	#DIV/0!	#DIV/0!	#DIV/0!	#DIV/0!	#DIV/0!	#DIV/0!	#DIV/0!	0
						#DIV/0!		#DIV/0!															#DIV/0!	#DIV/0!	#DIV/0!	#DIV/0!	#DIV/0!	#DIV/0!	#DIV/0!	#DIV/0!	#DIV/0!	#DIV/0!	#DIV/0!	#DIV/0!	#DIV/0!	0	0	0	0	0	0	#DIV/0!	#DIV/0!	#DIV/0!	#DIV/0!	#DIV/0!	#DIV/0!	#DIV/0!	0
						#DIV/0!		#DIV/0!															#DIV/0!	#DIV/0!	#DIV/0!	#DIV/0!	#DIV/0!	#DIV/0!	#DIV/0!	#DIV/0!	#DIV/0!	#DIV/0!	#DIV/0!	#DIV/0!	#DIV/0!	0	0	0	0	0	0	#DIV/0!	#DIV/0!	#DIV/0!	#DIV/0!	#DIV/0!	#DIV/0!	#DIV/0!	0
						#DIV/0!		#DIV/0!															#DIV/0!	#DIV/0!	#DIV/0!	#DIV/0!	#DIV/0!	#DIV/0!	#DIV/0!	#DIV/0!	#DIV/0!	#DIV/0!	#DIV/0!	#DIV/0!	#DIV/0!	0	0	0	0	0	0	#DIV/0!	#DIV/0!	#DIV/0!	#DIV/0!	#DIV/0!	#DIV/0!	#DIV/0!	0
						#DIV/0!		#DIV/0!															#DIV/0!	#DIV/0!	#DIV/0!	#DIV/0!	#DIV/0!	#DIV/0!	#DIV/0!	#DIV/0!	#DIV/0!	#DIV/0!	#DIV/0!	#DIV/0!	#DIV/0!	0	0	0	0	0	0	#DIV/0!	#DIV/0!	#DIV/0!	#DIV/0!	#DIV/0!	#DIV/0!	#DIV/0!	0
						#DIV/0!		#DIV/0!															#DIV/0!	#DIV/0!	#DIV/0!	#DIV/0!	#DIV/0!	#DIV/0!	#DIV/0!	#DIV/0!	#DIV/0!	#DIV/0!	#DIV/0!	#DIV/0!	#DIV/0!	0	0	0	0	0	0	#DIV/0!	#DIV/0!	#DIV/0!	#DIV/0!	#DIV/0!	#DIV/0!	#DIV/0!	0
						#DIV/0!		#DIV/0!															#DIV/0!	#DIV/0!	#DIV/0!	#DIV/0!	#DIV/0!	#DIV/0!	#DIV/0!	#DIV/0!	#DIV/0!	#DIV/0!	#DIV/0!	#DIV/0!	#DIV/0!	0	0	0	0	0	0	#DIV/0!	#DIV/0!	#DIV/0!	#DIV/0!	#DIV/0!	#DIV/0!	#DIV/0!	0
						#DIV/0!		#DIV/0!															#DIV/0!	#DIV/0!	#DIV/0!	#DIV/0!	#DIV/0!	#DIV/0!	#DIV/0!	#DIV/0!	#DIV/0!	#DIV/0!	#DIV/0!	#DIV/0!	#DIV/0!	0	0	0	0	0	0	#DIV/0!	#DIV/0!	#DIV/0!	#DIV/0!	#DIV/0!	#DIV/0!	#DIV/0!	0
						#DIV/0!		#DIV/0!															#DIV/0!	#DIV/0!	#DIV/0!	#DIV/0!	#DIV/0!	#DIV/0!	#DIV/0!	#DIV/0!	#DIV/0!	#DIV/0!	#DIV/0!	#DIV/0!	#DIV/0!	0	0	0	0	0	0	#DIV/0!	#DIV/0!	#DIV/0!	#DIV/0!	#DIV/0!	#DIV/0!	#DIV/0!	0
						#DIV/0!		#DIV/0!															#DIV/0!	#DIV/0!	#DIV/0!	#DIV/0!	#DIV/0!	#DIV/0!	#DIV/0!	#DIV/0!	#DIV/0!	#DIV/0!	#DIV/0!	#DIV/0!	#DIV/0!	0	0	0	0	0	0	#DIV/0!	#DIV/0!	#DIV/0!	#DIV/0!	#DIV/0!	#DIV/0!	#DIV/0!	0
						#DIV/0!		#DIV/0!															#DIV/0!	#DIV/0!	#DIV/0!	#DIV/0!	#DIV/0!	#DIV/0!	#DIV/0!	#DIV/0!	#DIV/0!	#DIV/0!	#DIV/0!	#DIV/0!	#DIV/0!	0	0	0	0	0	0	#DIV/0!	#DIV/0!	#DIV/0!	#DIV/0!	#DIV/0!	#DIV/0!	#DIV/0!	0
						#DIV/0!		#DIV/0!															#DIV/0!	#DIV/0!	#DIV/0!	#DIV/0!	#DIV/0!	#DIV/0!	#DIV/0!	#DIV/0!	#DIV/0!	#DIV/0!	#DIV/0!	#DIV/0!	#DIV/0!	0	0	0	0	0	0	#DIV/0!	#DIV/0!	#DIV/0!	#DIV/0!	#DIV/0!	#DIV/0!	#DIV/0!	0
						#DIV/0!		#DIV/0!															#DIV/0!	#DIV/0!	#DIV/0!	#DIV/0!	#DIV/0!	#DIV/0!	#DIV/0!	#DIV/0!	#DIV/0!	#DIV/0!	#DIV/0!	#DIV/0!	#DIV/0!	0	0	0	0	0	0	#DIV/0!	#DIV/0!	#DIV/0!	#DIV/0!	#DIV/0!	#DIV/0!	#DIV/0!	0
						#DIV/0!		#DIV/0!															#DIV/0!	#DIV/0!	#DIV/0!	#DIV/0!	#DIV/0!	#DIV/0!	#DIV/0!	#DIV/0!	#DIV/0!	#DIV/0!	#DIV/0!	#DIV/0!	#DIV/0!	0	0	0	0	0	0	#DIV/0!	#DIV/0!	#DIV/0!	#DIV/0!	#DIV/0!	#DIV/0!	#DIV/0!	0
						#DIV/0!		#DIV/0!															#DIV/0!	#DIV/0!	#DIV/0!	#DIV/0!	#DIV/0!	#DIV/0!	#DIV/0!	#DIV/0!	#DIV/0!	#DIV/0!	#DIV/0!	#DIV/0!	#DIV/0!	0	0	0	0	0	0	#DIV/0!	#DIV/0!	#DIV/0!	#DIV/0!	#DIV/0!	#DIV/0!	#DIV/0!	0
						#DIV/0!		#DIV/0!															#DIV/0!	#DIV/0!	#DIV/0!	#DIV/0!	#DIV/0!	#DIV/0!	#DIV/0!	#DIV/0!	#DIV/0!	#DIV/0!	#DIV/0!	#DIV/0!	#DIV/0!	0	0	0	0	0	0	#DIV/0!	#DIV/0!	#DIV/0!	#DIV/0!	#DIV/0!	#DIV/0!	#DIV/0!	0
						#DIV/0!		#DIV/0!															#DIV/0!	#DIV/0!	#DIV/0!	#DIV/0!	#DIV/0!	#DIV/0!	#DIV/0!	#DIV/0!	#DIV/0!	#DIV/0!	#DIV/0!	#DIV/0!	#DIV/0!	0	0	0	0	0	0	#DIV/0!	#DIV/0!	#DIV/0!	#DIV/0!	#DIV/0!	#DIV/0!	#DIV/0!	0
						#DIV/0!		#DIV/0!															#DIV/0!	#DIV/0!	#DIV/0!	#DIV/0!	#DIV/0!	#DIV/0!	#DIV/0!	#DIV/0!	#DIV/0!	#DIV/0!	#DIV/0!	#DIV/0!	#DIV/0!	0	0	0	0	0	0	#DIV/0!	#DIV/0!	#DIV/0!	#DIV/0!	#DIV/0!	#DIV/0!	#DIV/0!	0
						#DIV/0!		#DIV/0!															#DIV/0!	#DIV/0!	#DIV/0!	#DIV/0!	#DIV/0!	#DIV/0!	#DIV/0!	#DIV/0!	#DIV/0!	#DIV/0!	#DIV/0!	#DIV/0!	#DIV/0!	0	0	0	0	0	0	#DIV/0!	#DIV/0!	#DIV/0!	#DIV/0!	#DIV/0!	#DIV/0!	#DIV/0!	0
						#DIV/0!		#DIV/0!															#DIV/0!	#DIV/0!	#DIV/0!	#DIV/0!	#DIV/0!	#DIV/0!	#DIV/0!	#DIV/0!	#DIV/0!	#DIV/0!	#DIV/0!	#DIV/0!	#DIV/0!	0	0	0	0	0	0	#DIV/0!	#DIV/0!	#DIV/0!	#DIV/0!	#DIV/0!	#DIV/0!	#DIV/0!	0
						#DIV/0!		#DIV/0!															#DIV/0!	#DIV/0!	#DIV/0!	#DIV/0!	#DIV/0!	#DIV/0!	#DIV/0!	#DIV/0!	#DIV/0!	#DIV/0!	#DIV/0!	#DIV/0!	#DIV/0!	0	0	0	0	0	0	#DIV/0!	#DIV/0!	#DIV/0!	#DIV/0!	#DIV/0!	#DIV/0!	#DIV/0!	0
						#DIV/0!		#DIV/0!															#DIV/0!	#DIV/0!	#DIV/0!	#DIV/0!	#DIV/0!	#DIV/0!	#DIV/0!	#DIV/0!	#DIV/0!	#DIV/0!	#DIV/0!	#DIV/0!	#DIV/0!	0	0	0	0	0	0	#DIV/0!	#DIV/0!	#DIV/0!	#DIV/0!	#DIV/0!	#DIV/0!	#DIV/0!	0
						#DIV/0!		#DIV/0!															#DIV/0!	#DIV/0!	#DIV/0!	#DIV/0!	#DIV/0!	#DIV/0!	#DIV/0!	#DIV/0!	#DIV/0!	#DIV/0!	#DIV/0!	#DIV/0!	#DIV/0!	0	0	0	0	0	0	#DIV/0!	#DIV/0!	#DIV/0!	#DIV/0!	#DIV/0!	#DIV/0!	#DIV/0!	0
						#DIV/0!		#DIV/0!															#DIV/0!	#DIV/0!	#DIV/0!	#DIV/0!	#DIV/0!	#DIV/0!	#DIV/0!	#DIV/0!	#DIV/0!	#DIV/0!	#DIV/0!	#DIV/0!	#DIV/0!	0	0	0	0	0	0	#DIV/0!	#DIV/0!	#DIV/0!	#DIV/0!	#DIV/0!	#DIV/0!	#DIV/0!	0
						#DIV/0!		#DIV/0!															#DIV/0!	#DIV/0!	#DIV/0!	#DIV/0!	#DIV/0!	#DIV/0!	#DIV/0!	#DIV/0!	#DIV/0!	#DIV/0!	#DIV/0!	#DIV/0!	#DIV/0!	0	0	0	0	0	0	#DIV/0!	#DIV/0!	#DIV/0!	#DIV/0!	#DIV/0!	#DIV/0!	#DIV/0!	0
						#DIV/0!		#DIV/0!															#DIV/0!	#DIV/0!	#DIV/0!	#DIV/0!	#DIV/0!	#DIV/0!	#DIV/0!	#DIV/0!	#DIV/0!	#DIV/0!	#DIV/0!	#DIV/0!	#DIV/0!	0	0	0	0	0	0	#DIV/0!	#DIV/0!	#DIV/0!	#DIV/0!	#DIV/0!	#DIV/0!	#DIV/0!	0
						#DIV/0!		#DIV/0!															#DIV/0!	#DIV/0!	#DIV/0!	#DIV/0!	#DIV/0!	#DIV/0!	#DIV/0!	#DIV/0!	#DIV/0!	#DIV/0!	#DIV/0!	#DIV/0!	#DIV/0!	0	0	0	0	0	0	#DIV/0!	#DIV/0!	#DIV/0!	#DIV/0!	#DIV/0!	#DIV/0!	#DIV/0!	0
						#DIV/0!		#DIV/0!															#DIV/0!	#DIV/0!	#DIV/0!	#DIV/0!	#DIV/0!	#DIV/0!	#DIV/0!	#DIV/0!	#DIV/0!	#DIV/0!	#DIV/0!	#DIV/0!	#DIV/0!	0	0	0	0	0	0	#DIV/0!	#DIV/0!	#DIV/0!	#DIV/0!	#DIV/0!	#DIV/0!	#DIV/0!	0
						#DIV/0!		#DIV/0!															#DIV/0!	#DIV/0!	#DIV/0!	#DIV/0!	#DIV/0!	#DIV/0!	#DIV/0!	#DIV/0!	#DIV/0!	#DIV/0!	#DIV/0!	#DIV/0!	#DIV/0!	0	0	0	0	0	0	#DIV/0!	#DIV/0!	#DIV/0!	#DIV/0!	#DIV/0!	#DIV/0!	#DIV/0!	0
						#DIV/0!		#DIV/0!															#DIV/0!	#DIV/0!	#DIV/0!	#DIV/0!	#DIV/0!	#DIV/0!	#DIV/0!	#DIV/0!	#DIV/0!	#DIV/0!	#DIV/0!	#DIV/0!	#DIV/0!	0	0	0	0	0	0	#DIV/0!	#DIV/0!	#DIV/0!	#DIV/0!	#DIV/0!	#DIV/0!	#DIV/0!	0
						#DIV/0!		#DIV/0!															#DIV/0!	#DIV/0!	#DIV/0!	#DIV/0!	#DIV/0!	#DIV/0!	#DIV/0!	#DIV/0!	#DIV/0!	#DIV/0!	#DIV/0!	#DIV/0!	#DIV/0!	0	0	0	0	0	0	#DIV/0!	#DIV/0!	#DIV/0!	#DIV/0!	#DIV/0!	#DIV/0!	#DIV/0!	0
						#DIV/0!		#DIV/0!															#DIV/0!	#DIV/0!	#DIV/0!	#DIV/0!	#DIV/0!	#DIV/0!	#DIV/0!	#DIV/0!	#DIV/0!	#DIV/0!	#DIV/0!	#DIV/0!	#DIV/0!	0	0	0	0	0	0	#DIV/0!	#DIV/0!	#DIV/0!	#DIV/0!	#DIV/0!	#DIV/0!	#DIV/0!	0
						#DIV/0!		#DIV/0!															#DIV/0!	#DIV/0!	#DIV/0!	#DIV/0!	#DIV/0!	#DIV/0!	#DIV/0!	#DIV/0!	#DIV/0!	#DIV/0!	#DIV/0!	#DIV/0!	#DIV/0!	0	0	0	0	0	0	#DIV/0!	#DIV/0!	#DIV/0!	#DIV/0!	#DIV/0!	#DIV/0!	#DIV/0!	0
						#DIV/0!		#DIV/0!															#DIV/0!	#DIV/0!	#DIV/0!	#DIV/0!	#DIV/0!	#DIV/0!	#DIV/0!	#DIV/0!	#DIV/0!	#DIV/0!	#DIV/0!	#DIV/0!	#DIV/0!	0	0	0	0	0	0	#DIV/0!	#DIV/0!	#DIV/0!	#DIV/0!	#DIV/0!	#DIV/0!	#DIV/0!	0
						#DIV/0!		#DIV/0!															#DIV/0!	#DIV/0!	#DIV/0!	#DIV/0!	#DIV/0!	#DIV/0!	#DIV/0!	#DIV/0!	#DIV/0!	#DIV/0!	#DIV/0!	#DIV/0!	#DIV/0!	0	0	0	0	0	0	#DIV/0!	#DIV/0!	#DIV/0!	#DIV/0!	#DIV/0!	#DIV/0!	#DIV/0!	0
						#DIV/0!		#DIV/0!															#DIV/0!	#DIV/0!	#DIV/0!	#DIV/0!	#DIV/0!	#DIV/0!	#DIV/0!	#DIV/0!	#DIV/0!	#DIV/0!	#DIV/0!	#DIV/0!	#DIV/0!	0	0	0	0	0	0	#DIV/0!	#DIV/0!	#DIV/0!	#DIV/0!	#DIV/0!	#DIV/0!	#DIV/0!	0
						#DIV/0!		#DIV/0!															#DIV/0!	#DIV/0!	#DIV/0!	#DIV/0!	#DIV/0!	#DIV/0!	#DIV/0!	#DIV/0!	#DIV/0!	#DIV/0!	#DIV/0!	#DIV/0!	#DIV/0!	0	0	0	0	0	0	#DIV/0!	#DIV/0!	#DIV/0!	#DIV/0!	#DIV/0!	#DIV/0!	#DIV/0!	0
						#DIV/0!		#DIV/0!															#DIV/0!	#DIV/0!	#DIV/0!	#DIV/0!	#DIV/0!	#DIV/0!	#DIV/0!	#DIV/0!	#DIV/0!	#DIV/0!	#DIV/0!	#DIV/0!	#DIV/0!	0	0	0	0	0	0	#DIV/0!	#DIV/0!	#DIV/0!	#DIV/0!	#DIV/0!	#DIV/0!	#DIV/0!	0
						#DIV/0!		#DIV/0!															#DIV/0!	#DIV/0!	#DIV/0!	#DIV/0!	#DIV/0!	#DIV/0!	#DIV/0!	#DIV/0!	#DIV/0!	#DIV/0!	#DIV/0!	#DIV/0!	#DIV/0!	0	0	0	0	0	0	#DIV/0!	#DIV/0!	#DIV/0!	#DIV/0!	#DIV/0!	#DIV/0!	#DIV/0!	0
						#DIV/0!		#DIV/0!															#DIV/0!	#DIV/0!	#DIV/0!	#DIV/0!	#DIV/0!	#DIV/0!	#DIV/0!	#DIV/0!	#DIV/0!	#DIV/0!	#DIV/0!	#DIV/0!	#DIV/0!	0	0	0	0	0	0	#DIV/0!	#DIV/0!	#DIV/0!	#DIV/0!	#DIV/0!	#DIV/0!	#DIV/0!	0
						#DIV/0!		#DIV/0!															#DIV/0!	#DIV/0!	#DIV/0!	#DIV/0!	#DIV/0!	#DIV/0!	#DIV/0!	#DIV/0!	#DIV/0!	#DIV/0!	#DIV/0!	#DIV/0!	#DIV/0!	0	0	0	0	0	0	#DIV/0!	#DIV/0!	#DIV/0!	#DIV/0!	#DIV/0!	#DIV/0!	#DIV/0!	0
						#DIV/0!		#DIV/0!															#DIV/0!	#DIV/0!	#DIV/0!	#DIV/0!	#DIV/0!	#DIV/0!	#DIV/0!	#DIV/0!	#DIV/0!	#DIV/0!	#DIV/0!	#DIV/0!	#DIV/0!	0	0	0	0	0	0	#DIV/0!	#DIV/0!	#DIV/0!	#DIV/0!	#DIV/0!	#DIV/0!	#DIV/0!	0
						#DIV/0!		#DIV/0!															#DIV/0!	#DIV/0!	#DIV/0!	#DIV/0!	#DIV/0!	#DIV/0!	#DIV/0!	#DIV/0!	#DIV/0!	#DIV/0!	#DIV/0!	#DIV/0!	#DIV/0!	0	0	0	0	0	0	#DIV/0!	#DIV/0!	#DIV/0!	#DIV/0!	#DIV/0!	#DIV/0!	#DIV/0!	0
						#DIV/0!		#DIV/0!															#DIV/0!	#DIV/0!	#DIV/0!	#DIV/0!	#DIV/0!	#DIV/0!	#DIV/0!	#DIV/0!	#DIV/0!	#DIV/0!	#DIV/0!	#DIV/0!	#DIV/0!	0	0	0	0	0	0	#DIV/0!	#DIV/0!	#DIV/0!	#DIV/0!	#DIV/0!	#DIV/0!	#DIV/0!	0
						#DIV/0!		#DIV/0!															#DIV/0!	#DIV/0!	#DIV/0!	#DIV/0!	#DIV/0!	#DIV/0!	#DIV/0!	#DIV/0!	#DIV/0!	#DIV/0!	#DIV/0!	#DIV/0!	#DIV/0!	0	0	0	0	0	0	#DIV/0!	#DIV/0!	#DIV/0!	#DIV/0!	#DIV/0!	#DIV/0!	#DIV/0!	0
						#DIV/0!		#DIV/0!															#DIV/0!	#DIV/0!	#DIV/0!	#DIV/0!	#DIV/0!	#DIV/0!	#DIV/0!	#DIV/0!	#DIV/0!	#DIV/0!	#DIV/0!	#DIV/0!	#DIV/0!	0	0	0	0	0	0	#DIV/0!	#DIV/0!	#DIV/0!	#DIV/0!	#DIV/0!	#DIV/0!	#DIV/0!	0
						#DIV/0!		#DIV/0!															#DIV/0!	#DIV/0!	#DIV/0!	#DIV/0!	#DIV/0!	#DIV/0!	#DIV/0!	#DIV/0!	#DIV/0!	#DIV/0!	#DIV/0!	#DIV/0!	#DIV/0!	0	0	0	0	0	0	#DIV/0!	#DIV/0!	#DIV/0!	#DIV/0!	#DIV/0!	#DIV/0!	#DIV/0!	0
						#DIV/0!		#DIV/0!															#DIV/0!	#DIV/0!	#DIV/0!	#DIV/0!	#DIV/0!	#DIV/0!	#DIV/0!	#DIV/0!	#DIV/0!	#DIV/0!	#DIV/0!	#DIV/0!	#DIV/0!	0	0	0	0	0	0	#DIV/0!	#DIV/0!	#DIV/0!	#DIV/0!	#DIV/0!	#DIV/0!	#DIV/0!	0
						#DIV/0!		#DIV/0!															#DIV/0!	#DIV/0!	#DIV/0!	#DIV/0!	#DIV/0!	#DIV/0!	#DIV/0!	#DIV/0!	#DIV/0!	#DIV/0!	#DIV/0!	#DIV/0!	#DIV/0!	0	0	0	0	0	0	#DIV/0!	#DIV/0!	#DIV/0!	#DIV/0!	#DIV/0!	#DIV/0!	#DIV/0!	0
						#DIV/0!		#DIV/0!															#DIV/0!	#DIV/0!	#DIV/0!	#DIV/0!	#DIV/0!	#DIV/0!	#DIV/0!	#DIV/0!	#DIV/0!	#DIV/0!	#DIV/0!	#DIV/0!	#DIV/0!	0	0	0	0	0	0	#DIV/0!	#DIV/0!	#DIV/0!	#DIV/0!	#DIV/0!	#DIV/0!	#DIV/0!	0
						#DIV/0!		#DIV/0!															#DIV/0!	#DIV/0!	#DIV/0!	#DIV/0!	#DIV/0!	#DIV/0!	#DIV/0!	#DIV/0!	#DIV/0!	#DIV/0!	#DIV/0!	#DIV/0!	#DIV/0!	0	0	0	0	0	0	#DIV/0!	#DIV/0!	#DIV/0!	#DIV/0!	#DIV/0!	#DIV/0!	#DIV/0!	0
						#DIV/0!		#DIV/0!															#DIV/0!	#DIV/0!	#DIV/0!	#DIV/0!	#DIV/0!	#DIV/0!	#DIV/0!	#DIV/0!	#DIV/0!	#DIV/0!	#DIV/0!	#DIV/0!	#DIV/0!	0	0	0	0	0	0	#DIV/0!	#DIV/0!	#DIV/0!	#DIV/0!	#DIV/0!	#DIV/0!	#DIV/0!	0
						#DIV/0!		#DIV/0!															#DIV/0!	#DIV/0!	#DIV/0!	#DIV/0!	#DIV/0!	#DIV/0!	#DIV/0!	#DIV/0!	#DIV/0!	#DIV/0!	#DIV/0!	#DIV/0!	#DIV/0!	0	0	0	0	0	0	#DIV/0!	#DIV/0!	#DIV/0!	#DIV/0!	#DIV/0!	#DIV/0!	#DIV/0!	0
						#DIV/0!		#DIV/0!															#DIV/0!	#DIV/0!	#DIV/0!	#DIV/0!	#DIV/0!	#DIV/0!	#DIV/0!	#DIV/0!	#DIV/0!	#DIV/0!	#DIV/0!	#DIV/0!	#DIV/0!	0	0	0	0	0	0	#DIV/0!	#DIV/0!	#DIV/0!	#DIV/0!	#DIV/0!	#DIV/0!	#DIV/0!	0
						#DIV/0!		#DIV/0!															#DIV/0!	#DIV/0!	#DIV/0!	#DIV/0!	#DIV/0!	#DIV/0!	#DIV/0!	#DIV/0!	#DIV/0!	#DIV/0!	#DIV/0!	#DIV/0!	#DIV/0!	0	0	0	0	0	0	#DIV/0!	#DIV/0!	#DIV/0!	#DIV/0!	#DIV/0!	#DIV/0!	#DIV/0!	0
						#DIV/0!		#DIV/0!															#DIV/0!	#DIV/0!	#DIV/0!	#DIV/0!	#DIV/0!	#DIV/0!	#DIV/0!	#DIV/0!	#DIV/0!	#DIV/0!	#DIV/0!	#DIV/0!	#DIV/0!	0	0	0	0	0	0	#DIV/0!	#DIV/0!	#DIV/0!	#DIV/0!	#DIV/0!	#DIV/0!	#DIV/0!	0
						#DIV/0!		#DIV/0!															#DIV/0!	#DIV/0!	#DIV/0!	#DIV/0!	#DIV/0!	#DIV/0!	#DIV/0!	#DIV/0!	#DIV/0!	#DIV/0!	#DIV/0!	#DIV/0!	#DIV/0!	0	0	0	0	0	0	#DIV/0!	#DIV/0!	#DIV/0!	#DIV/0!	#DIV/0!	#DIV/0!	#DIV/0!	0
						#DIV/0!		#DIV/0!															#DIV/0!	#DIV/0!	#DIV/0!	#DIV/0!	#DIV/0!	#DIV/0!	#DIV/0!	#DIV/0!	#DIV/0!	#DIV/0!	#DIV/0!	#DIV/0!	#DIV/0!	0	0	0	0	0	0	#DIV/0!	#DIV/0!	#DIV/0!	#DIV/0!	#DIV/0!	#DIV/0!	#DIV/0!	0
						#DIV/0!		#DIV/0!															#DIV/0!	#DIV/0!	#DIV/0!	#DIV/0!	#DIV/0!	#DIV/0!	#DIV/0!	#DIV/0!	#DIV/0!	#DIV/0!	#DIV/0!	#DIV/0!	#DIV/0!	0	0	0	0	0	0	#DIV/0!	#DIV/0!	#DIV/0!	#DIV/0!	#DIV/0!	#DIV/0!	#DIV/0!	0
						#DIV/0!		#DIV/0!															#DIV/0!	#DIV/0!	#DIV/0!	#DIV/0!	#DIV/0!	#DIV/0!	#DIV/0!	#DIV/0!	#DIV/0!	#DIV/0!	#DIV/0!	#DIV/0!	#DIV/0!	0	0	0	0	0	0	#DIV/0!	#DIV/0!	#DIV/0!	#DIV/0!	#DIV/0!	#DIV/0!	#DIV/0!	0
						#DIV/0!		#DIV/0!															#DIV/0!	#DIV/0!	#DIV/0!	#DIV/0!	#DIV/0!	#DIV/0!	#DIV/0!	#DIV/0!	#DIV/0!	#DIV/0!	#DIV/0!	#DIV/0!	#DIV/0!	0	0	0	0	0	0	#DIV/0!	#DIV/0!	#DIV/0!	#DIV/0!	#DIV/0!	#DIV/0!	#DIV/0!	0
						#DIV/0!		#DIV/0!															#DIV/0!	#DIV/0!	#DIV/0!	#DIV/0!	#DIV/0!	#DIV/0!	#DIV/0!	#DIV/0!	#DIV/0!	#DIV/0!	#DIV/0!	#DIV/0!	#DIV/0!	0	0	0	0	0	0	#DIV/0!	#DIV/0!	#DIV/0!	#DIV/0!	#DIV/0!	#DIV/0!	#DIV/0!	0
						#DIV/0!		#DIV/0!															#DIV/0!	#DIV/0!	#DIV/0!	#DIV/0!	#DIV/0!	#DIV/0!	#DIV/0!	#DIV/0!	#DIV/0!	#DIV/0!	#DIV/0!	#DIV/0!	#DIV/0!	0	0	0	0	0	0	#DIV/0!	#DIV/0!	#DIV/0!	#DIV/0!	#DIV/0!	#DIV/0!	#DIV/0!	0
						#DIV/0!		#DIV/0!															#DIV/0!	#DIV/0!	#DIV/0!	#DIV/0!	#DIV/0!	#DIV/0!	#DIV/0!	#DIV/0!	#DIV/0!	#DIV/0!	#DIV/0!	#DIV/0!	#DIV/0!	0	0	0	0	0	0	#DIV/0!	#DIV/0!	#DIV/0!	#DIV/0!	#DIV/0!	#DIV/0!	#DIV/0!	0
						#DIV/0!		#DIV/0!															#DIV/0!	#DIV/0!	#DIV/0!	#DIV/0!	#DIV/0!	#DIV/0!	#DIV/0!	#DIV/0!	#DIV/0!	#DIV/0!	#DIV/0!	#DIV/0!	#DIV/0!	0	0	0	0	0	0	#DIV/0!	#DIV/0!	#DIV/0!	#DIV/0!	#DIV/0!	#DIV/0!	#DIV/0!	0
						#DIV/0!		#DIV/0!															#DIV/0!	#DIV/0!	#DIV/0!	#DIV/0!	#DIV/0!	#DIV/0!	#DIV/0!	#DIV/0!	#DIV/0!	#DIV/0!	#DIV/0!	#DIV/0!	#DIV/0!	0	0	0	0	0	0	#DIV/0!	#DIV/0!	#DIV/0!	#DIV/0!	#DIV/0!	#DIV/0!	#DIV/0!	0
						#DIV/0!		#DIV/0!															#DIV/0!	#DIV/0!	#DIV/0!	#DIV/0!	#DIV/0!	#DIV/0!	#DIV/0!	#DIV/0!	#DIV/0!	#DIV/0!	#DIV/0!	#DIV/0!	#DIV/0!	0	0	0	0	0	0	#DIV/0!	#DIV/0!	#DIV/0!	#DIV/0!	#DIV/0!	#DIV/0!	#DIV/0!	0
						#DIV/0!		#DIV/0!															#DIV/0!	#DIV/0!	#DIV/0!	#DIV/0!	#DIV/0!	#DIV/0!	#DIV/0!	#DIV/0!	#DIV/0!	#DIV/0!	#DIV/0!	#DIV/0!	#DIV/0!	0	0	0	0	0	0	#DIV/0!	#DIV/0!	#DIV/0!	#DIV/0!	#DIV/0!	#DIV/0!	#DIV/0!	0
						#DIV/0!		#DIV/0!															#DIV/0!	#DIV/0!	#DIV/0!	#DIV/0!	#DIV/0!	#DIV/0!	#DIV/0!	#DIV/0!	#DIV/0!	#DIV/0!	#DIV/0!	#DIV/0!	#DIV/0!	0	0	0	0	0	0	#DIV/0!	#DIV/0!	#DIV/0!	#DIV/0!	#DIV/0!	#DIV/0!	#DIV/0!	0
						#DIV/0!		#DIV/0!															#DIV/0!	#DIV/0!	#DIV/0!	#DIV/0!	#DIV/0!	#DIV/0!	#DIV/0!	#DIV/0!	#DIV/0!	#DIV/0!	#DIV/0!	#DIV/0!	#DIV/0!	0	0	0	0	0	0	#DIV/0!	#DIV/0!	#DIV/0!	#DIV/0!	#DIV/0!	#DIV/0!	#DIV/0!	0
						#DIV/0!		#DIV/0!															#DIV/0!	#DIV/0!	#DIV/0!	#DIV/0!	#DIV/0!	#DIV/0!	#DIV/0!	#DIV/0!	#DIV/0!	#DIV/0!	#DIV/0!	#DIV/0!	#DIV/0!	0	0	0	0	0	0	#DIV/0!	#DIV/0!	#DIV/0!	#DIV/0!	#DIV/0!	#DIV/0!	#DIV/0!	0
						#DIV/0!		#DIV/0!															#DIV/0!	#DIV/0!	#DIV/0!	#DIV/0!	#DIV/0!	#DIV/0!	#DIV/0!	#DIV/0!	#DIV/0!	#DIV/0!	#DIV/0!	#DIV/0!	#DIV/0!	0	0	0	0	0	0	#DIV/0!	#DIV/0!	#DIV/0!	#DIV/0!	#DIV/0!	#DIV/0!	#DIV/0!	0
						#DIV/0!		#DIV/0!															#DIV/0!	#DIV/0!	#DIV/0!	#DIV/0!	#DIV/0!	#DIV/0!	#DIV/0!	#DIV/0!	#DIV/0!	#DIV/0!	#DIV/0!	#DIV/0!	#DIV/0!	0	0	0	0	0	0	#DIV/0!	#DIV/0!	#DIV/0!	#DIV/0!	#DIV/0!	#DIV/0!	#DIV/0!	0
						#DIV/0!		#DIV/0!															#DIV/0!	#DIV/0!	#DIV/0!	#DIV/0!	#DIV/0!	#DIV/0!	#DIV/0!	#DIV/0!	#DIV/0!	#DIV/0!	#DIV/0!	#DIV/0!	#DIV/0!	0	0	0	0	0	0	#DIV/0!	#DIV/0!	#DIV/0!	#DIV/0!	#DIV/0!	#DIV/0!	#DIV/0!	0
						#DIV/0!		#DIV/0!															#DIV/0!	#DIV/0!	#DIV/0!	#DIV/0!	#DIV/0!	#DIV/0!	#DIV/0!	#DIV/0!	#DIV/0!	#DIV/0!	#DIV/0!	#DIV/0!	#DIV/0!	0	0	0	0	0	0	#DIV/0!	#DIV/0!	#DIV/0!	#DIV/0!	#DIV/0!	#DIV/0!	#DIV/0!	0
						#DIV/0!		#DIV/0!															#DIV/0!	#DIV/0!	#DIV/0!	#DIV/0!	#DIV/0!	#DIV/0!	#DIV/0!	#DIV/0!	#DIV/0!	#DIV/0!	#DIV/0!	#DIV/0!	#DIV/0!	0	0	0	0	0	0	#DIV/0!	#DIV/0!	#DIV/0!	#DIV/0!	#DIV/0!	#DIV/0!	#DIV/0!	0
						#DIV/0!		#DIV/0!															#DIV/0!	#DIV/0!	#DIV/0!	#DIV/0!	#DIV/0!	#DIV/0!	#DIV/0!	#DIV/0!	#DIV/0!	#DIV/0!	#DIV/0!	#DIV/0!	#DIV/0!	0	0	0	0	0	0	#DIV/0!	#DIV/0!	#DIV/0!	#DIV/0!	#DIV/0!	#DIV/0!	#DIV/0!	0
						#DIV/0!		#DIV/0!
						#DIV/0!		#DIV/0!
						#DIV/0!		#DIV/0!
						#DIV/0!		#DIV/0!
						#DIV/0!		#DIV/0!
						#DIV/0!		#DIV/0!
						#DIV/0!		#DIV/0!
						#DIV/0!		#DIV/0!
						#DIV/0!		#DIV/0!
						#DIV/0!		#DIV/0!
						#DIV/0!		#DIV/0!
						#DIV/0!		#DIV/0!
						#DIV/0!		#DIV/0!
						#DIV/0!		#DIV/0!
						#DIV/0!		#DIV/0!
[truncated: 33 more columns]

## Sheet: Site5
Date:	27/8/2014
Site No. :	5V23
			Width (m)	Length (m)	Area (ha)			Length (m)
	Transect Dimensions:		25	25	0.0625
	Co-ordinates:			X	Y			X
			NW Corner
			SW Corner
			NE Corner
			SE Corner
									OED		OUD	NED		NUD	NFD	OFD	OBE	OBU	NBE	NBU	RE	Notes	Canopy volume (m3)																				Damage
Trans. No.	Sp. Code	Coppice	Height (m)	D1 (m)	D2 (m)	R	Shape	Adj. shape	Score	Eaten		Score	Eaten										Total	0.5	1	2	3	4	5	0.5	1	2	3	4	5	OED	OUD	NED	NUD	NFD	OFD	Old Rec. Vol.	OED	OUD	NED	NUD	NFD	OFD	Sp. Code
1	Cou gla	T	0.6	0.47	0.36	0.2075	3	3			1			2									0.027026	0.0269009	0.0350337	0.370356	1.75669	4.94475	10.6853	0.0269009	0.027026	0.027026	0.027026	0.027026	0.027026	0	5.5	0	18	0	0	0.0285989	0	0.157294	0	0.593253	0	0	Cou gla
1	Cou gla	T	0.6	0.73	0.74	0.3675	3	3			2			2									0.0847735	0.084381	0.109892	1.16171	5.51028	15.5104	33.5169	0.084381	0.0847735	0.0847735	0.0847735	0.0847735	0.0847735	0	18	0	18	0	0	0.103382	0	1.86088	0	1.86088	0	0	Cou gla
1	Cou gla	T	0.65	1.31	0.93	0.56	1	1			1			3									0.640382	0.492602	0.985203	1.97041	2.95561	3.94081	4.92602	0.492602	0.640382	0.640382	0.640382	0.640382	0.640382	0	5.5	0	38	0	0	0.677653	0	3.72709	0	39.2492	0	0	Cou gla
1	Dic cin	T	0.25	0.42	0.41	0.2075	1	1			1												0.0338163	0.0676326	0.135265	0.27053	0.405796	0.541061	0.676326	0.0338163	0.0338163	0.0338163	0.0338163	0.0338163	0.0338163	0	5.5	0	0	0	0	0.0357844	0	0.196814	0	0	0	0	Dic cin
1	Gre ina	T	0.6	0.69	0.52	0.3025	1	1			1												0.172485	0.143738	0.287475	0.574951	0.862426	1.1499	1.43738	0.143738	0.172485	0.172485	0.172485	0.172485	0.172485	0	5.5	0	0	0	0	0.182524	0	1.00388	0	0	0	0	Gre ina
1	Gre bic	T	0.9	1.19	0.87	0.515	3	3	4					1									0.249719	0.227796	0.250061	0.705652	3.42207	10.4546	23.8586	0.227796	0.249719	0.249719	0.249719	0.249719	0.249719	63	0	0	5.5	0	0	0.674915	42.5197	0	0	1.45339	0	0	Gre bic
1	Cou gla	T	0.6	1.05	0.64	0.4225	1	1			3			1									0.336476	0.280397	0.560794	1.12159	1.68238	2.24318	2.80397	0.280397	0.336476	0.336476	0.336476	0.336476	0.336476	0	38	0	5.5	0	0	0.542704	0	20.6227	0	1.95833	0	0	Cou gla
1	Cou gla	T	0.75	1.28	0.92	0.55	1	1			3			2									0.712749	0.475166	0.950332	1.90066	2.851	3.80133	4.75166	0.475166	0.712749	0.712749	0.712749	0.712749	0.712749	0	38	0	18	0	0	1.14959	0	43.6846	0	15.6457	0	0	Cou gla
1	Mae par	T	0.1	0.25	0.1	0.0875	3	3			1												0.000800959	0.0520623	0.5847	5.49458	19.5354	47.5129	94.2328	0.000800959	0.000800959	0.000800959	0.000800959	0.000800959	0.000800959	0	5.5	0	0	0	0	0.000847576	0	0.00466167	0	0	0	0	Mae par
1	Mae par	T	0.3	0.31	0.05	0.09	3	3			1			1									0.00254215	0.00329537	0.0348368	0.465118	1.85577	4.7717	9.77784	0.00254215	0.00254215	0.00254215	0.00254215	0.00254215	0.00254215	0	5.5	0	5.5	0	0	0.0026901	0	0.0147956	0	0.0147956	0	0	Mae par
1	Mae par	T	0.2	0.18	0.14	0.08	1	1			2			1									0.00402124	0.0100531	0.0201062	0.0402124	0.0603186	0.0804248	0.100531	0.00402124	0.00402124	0.00402124	0.00402124	0.00402124	0.00402124	0	18	0	5.5	0	0	0.00490395	0	0.0882711	0	0.023404	0	0	Mae par
1	Mae par	T	0.15	0.08	0.06	0.035	1	1			3			1									0.000577268	0.00192423	0.00384845	0.0076969	0.0115454	0.0153938	0.0192423	0.000577268	0.000577268	0.000577268	0.000577268	0.000577268	0.000577268	0	38	0	5.5	0	0	0.000931077	0	0.0353809	0	0.00335976	0	0	Mae par
1	Mae par	T	0.05	0.13	0.02	0.0375	1	1						4									0.000220893	0.00220893	0.00441786	0.00883573	0.0132536	0.0176715	0.0220893	0.000220893	0.000220893	0.000220893	0.000220893	0.000220893	0.000220893	0	0	0	63	0	0	0.000220893	0	0	0	0.0376116	0	0	Mae par
1	Mae par	T	0.1	0.11	0.02	0.0325	1	1						4									0.000331831	0.00165915	0.00331831	0.00663661	0.00995492	0.0132732	0.0165915	0.000331831	0.000331831	0.000331831	0.000331831	0.000331831	0.000331831	0	0	0	63	0	0	0.000331831	0	0	0	0.0565009	0	0	Mae par
1	Mae par	T	0.2	0.16	0.06	0.055	3	3			4			2									0.000632921	0.00276903	0.0411399	0.462032	1.73737	4.34184	8.75013	0.000632921	0.000632921	0.000632921	0.000632921	0.000632921	0.000632921	0	63	0	18	0	0	0.0017106	0	0.107768	0	0.0138934	0	0	Mae par
1	Gre bic	T	1.7	2.65	2.2	1.2125	1	1	4					3									7.85167	2.30932	4.61863	9.23726	13.8559	18.4745	23.0932	2.30932	4.61863	7.85167	7.85167	7.85167	7.85167	63	0	0	38	0	0	21.2207	1336.91	0	0	481.232	0	0	Gre bic
1	Gre bic	T	1.9	2.8	2.22	1.255	3	3	3			1											3.13065	1.87821	2.79792	3.13111	3.73816	7.35765	16.7282	1.87821	2.79792	3.13065	3.13065	3.13065	3.13065	38	0	5.5	0	0	0	5.04944	191.879	0	18.2207	0	0	0	Gre bic
1	Gre bic	T	1.7	2.65	2.2	1.2125	3	3	2			1											2.61461	1.695	2.43207	2.62898	3.78381	9.08966	21.7396	1.695	2.43207	2.61461	2.61461	2.61461	2.61461	18	0	5.5	0	0	0	3.18855	57.3938	0	15.2173	0	0	0	Gre bic
1	Cou gla	T	0.9	1.25	0.72	0.4925	3	3			2			1									0.228375	0.208326	0.228689	0.64534	3.12959	9.56106	21.8194	0.208326	0.228375	0.228375	0.228375	0.228375	0.228375	0	18	0	5.5	0	0	0.278506	0	5.01312	0	1.32917	0	0	Cou gla
1	Cou gla	T	0.9	0.93	0.7	0.4075	3	3			2			2									0.156348	0.142622	0.156562	0.441806	2.14254	6.54559	14.9378	0.142622	0.156348	0.156348	0.156348	0.156348	0.156348	0	18	0	18	0	0	0.190668	0	3.43203	0	3.43203	0	0	Cou gla
1	Cou gla	T	0.8	1.27	0.56	0.4575	1	1			2			1									0.526044	0.328777	0.657555	1.31511	1.97266	2.63022	3.28777	0.328777	0.526044	0.526044	0.526044	0.526044	0.526044	0	18	0	5.5	0	0	0.641517	0	11.5473	0	3.06163	0	0	Cou gla
1	Cou gla	T	0.75	1.5	1.55	0.7625	6	1			3			2									1.36991	0.913271	1.82654	3.65308	5.47962	7.30617	9.13271	0.913271	1.36991	1.36991	1.36991	1.36991	1.36991	0	38	0	18	0	0	2.20953	0	83.962	0	30.0711	0	0	Cou gla
1	Cou gla	T	1	0.9	1.1	0.5	1	1			3			2									0.785398	0.392699	0.785398	1.5708	2.35619	3.14159	3.92699	0.392699	0.785398	0.785398	0.785398	0.785398	0.785398	0	38	0	18	0	0	1.26677	0	48.1373	0	17.2404	0	0	Cou gla
1	Cou gla	T	0.75	1.1	0.75	0.4625	3	3			3			2									0.167834	0.161618	0.17405	0.944841	4.69934	13.8245	30.7073	0.161618	0.167834	0.167834	0.167834	0.167834	0.167834	0	38	0	18	0	0	0.270699	0	10.2866	0	3.68415	0	0	Cou gla
1	Cou gla	T	0.75	1.5	0.9	0.6	1	1			3			2									0.84823	0.565487	1.13097	2.26195	3.39292	4.52389	5.65487	0.565487	0.84823	0.84823	0.84823	0.84823	0.84823	0	38	0	18	0	0	1.36811	0	51.9883	0	18.6197	0	0	Cou gla
1	Cou gla	T	0.7	0.82	1.12	0.485	1	1			3			2									0.517287	0.369491	0.738981	1.47796	2.21694	2.95592	3.69491	0.369491	0.517287	0.517287	0.517287	0.517287	0.517287	0	38	0	18	0	0	0.834334	0	31.7047	0	11.3551	0	0	Cou gla
1	Cou gla	T	0.8	1.1	1	0.525	1	1			1			2									0.692721	0.432951	0.865901	1.7318	2.5977	3.46361	4.32951	0.432951	0.692721	0.692721	0.692721	0.692721	0.692721	0	5.5	0	18	0	0	0.733038	0	4.03171	0	15.2061	0	0	Cou gla
1	Cou gla	T	0.8	0.95	0.95	0.475	1	1			3			2									0.567057	0.354411	0.708822	1.41764	2.12647	2.83529	3.54411	0.354411	0.567057	0.567057	0.567057	0.567057	0.567057	0	38	0	18	0	0	0.914609	0	34.7551	0	12.4476	0	0	Cou gla
1	Gre bic	T	1.3	1.25	1.28	0.6325	1	1	4			2											1.63386	0.628407	1.25681	2.51363	3.77044	5.02726	6.28407	0.628407	1.25681	1.63386	1.63386	1.63386	1.63386	63	0	18	0	0	0	4.41583	278.197	0	35.8652	0	0	0	Gre bic
1	Gre bic	T	1	1.1	1.27	0.5925	1	1	3														1.10288	0.551438	1.10288	2.20575	3.30863	4.4115	5.51438	0.551438	1.10288	1.10288	1.10288	1.10288	1.10288	38	0	0	0	0	0	1.77883	67.5956	0	0	0	0	0	Gre bic
1	Cou gla	T	0.65	0.8	0.85	0.4125	1	1			3			2									0.347465	0.267281	0.534562	1.06912	1.60368	2.13825	2.67281	0.267281	0.347465	0.347465	0.347465	0.347465	0.347465	0	38	0	18	0	0	0.560428	0	21.2962	0	7.62728	0	0	Cou gla
1	Cou gla	T	0.65	0.55	0.65	0.3	1	1			2			2									0.183783	0.141372	0.282743	0.565487	0.84823	1.13097	1.41372	0.141372	0.183783	0.183783	0.183783	0.183783	0.183783	0	18	0	18	0	0	0.224126	0	4.03426	0	4.03426	0	0	Cou gla
1	Cou gla	T	0.65	1.3	1.35	0.6625	1	1						2									0.896262	0.689432	1.37886	2.75773	4.13659	5.51546	6.89432	0.689432	0.896262	0.896262	0.896262	0.896262	0.896262	0	0	0	18	0	0	0.896262	0	0	0	19.674	0	0	Cou gla
1	Cou gla	T	0.6	0.45	0.2	0.1625	3	3						2									0.0165749	0.0164982	0.021486	0.227138	1.07737	3.0326	6.55324	0.0164982	0.0165749	0.0165749	0.0165749	0.0165749	0.0165749	0	0	0	18	0	0	0.0165749	0	0	0	0.36384	0	0	Cou gla
1	Cou gla	T	0.6	0.79	0.93	0.43	1	1			2			1									0.348528	0.29044	0.58088	1.16176	1.74264	2.32352	2.9044	0.29044	0.348528	0.348528	0.348528	0.348528	0.348528	0	18	0	5.5	0	0	0.425034	0	7.65062	0	2.02847	0	0	Cou gla
1	Cou gla	T	0.45	0.37	0.13	0.125	1	1			2			2									0.0220893	0.0245437	0.0490874	0.0981748	0.147262	0.19635	0.245437	0.0220893	0.0220893	0.0220893	0.0220893	0.0220893	0.0220893	0	18	0	18	0	0	0.0269382	0	0.484888	0	0.484888	0	0	Cou gla
1	Cou gla	T	0.85	0.71	0.85	0.39	1	1			2			1									0.406161	0.238918	0.477836	0.955672	1.43351	1.91134	2.38918	0.238918	0.406161	0.406161	0.406161	0.406161	0.406161	0	18	0	5.5	0	0	0.495318	0	8.91573	0	2.3639	0	0	Cou gla
1	Cou gla	T	0.55	0.4	0.49	0.2225	1	1			2			1									0.0855407	0.0777642	0.155528	0.311057	0.466585	0.622114	0.777642	0.0777642	0.0855407	0.0855407	0.0855407	0.0855407	0.0855407	0	18	0	5.5	0	0	0.104318	0	1.87772	0	0.497856	0	0	Cou gla
1	Cou gla	T	0.55	0.98	0.65	0.4075	1	1			3			1									0.286925	0.260841	0.521681	1.04336	1.56504	2.08672	2.60841	0.260841	0.286925	0.286925	0.286925	0.286925	0.286925	0	38	0	5.5	0	0	0.462782	0	17.5857	0	1.66993	0	0	Cou gla
1	Gre bic	T	0.8	1.47	2.1	0.8925	1	1	4					3									2.00196	1.25123	2.50246	5.00491	7.50737	10.0098	12.5123	1.25123	2.00196	2.00196	2.00196	2.00196	2.00196	63	0	0	38	0	0	5.41071	340.875	0	0	122.701	0	0	Gre bic
1	Gre bic	T	1.2	1.65	0.85	0.625	1	1	3			2											1.47262	0.613592	1.22718	2.45437	3.68155	4.90874	6.13592	0.613592	1.22718	1.47262	1.47262	1.47262	1.47262	38	0	18	0	0	0	2.3752	90.2575	0	32.3258	0	0	0	Gre bic
1	Cou gla	T	0.6	0.7	0.75	0.3625	1	1			3			1									0.247695	0.206412	0.412825	0.82565	1.23847	1.6513	2.06412	0.206412	0.247695	0.247695	0.247695	0.247695	0.247695	0	38	0	5.5	0	0	0.399508	0	15.1813	0	1.44161	0	0	Cou gla
1	Cou gla	T	0.55	0.7	0.7	0.35	1	1			1			2									0.211665	0.192423	0.384845	0.76969	1.15454	1.53938	1.92423	0.192423	0.211665	0.211665	0.211665	0.211665	0.211665	0	5.5	0	18	0	0	0.223984	0	1.23191	0	4.6463	0	0	Cou gla
1	Cou gla	T	0.5	0.8	0.35	0.2875	3	3			3			1									0.0432354	0.0432354	0.0864709	1.21059	5.44766	14.873	31.5619	0.0432354	0.0432354	0.0432354	0.0432354	0.0432354	0.0432354	0	38	0	5.5	0	0	0.0697346	0	2.64991	0	0.251635	0	0	Cou gla
1	Cou gla	T	0.9	0.95	1.1	0.5125	1	1			2			1									0.742643	0.412579	0.825159	1.65032	2.47548	3.30064	4.12579	0.412579	0.742643	0.742643	0.742643	0.742643	0.742643	0	18	0	5.5	0	0	0.905662	0	16.3019	0	4.32226	0	0	Cou gla
1	Gre bic	T	1.5	1.45	1.3	0.6875	1	1	3														2.22734	0.742447	1.48489	2.96979	4.45468	5.93957	7.42447	0.742447	1.48489	2.22734	2.22734	2.22734	2.22734	38	0	0	0	0	0	3.59248	136.514	0	0	0	0	0	Gre bic
1	Gre bic	T	1.2	1.65	1.5	0.7875	1	1	4					1									2.33793	0.974139	1.94828	3.89656	5.84483	7.79311	9.74139	0.974139	1.94828	2.33793	2.33793	2.33793	2.33793	63	0	0	5.5	0	0	6.31874	398.081	0	0	13.607	0	0	Gre bic
1	Cou gla	T	0.7	0.95	1.05	0.5	1	1			2			1									0.549779	0.392699	0.785398	1.5708	2.35619	3.14159	3.92699	0.392699	0.549779	0.549779	0.549779	0.549779	0.549779	0	18	0	5.5	0	0	0.670462	0	12.0683	0	3.19977	0	0	Cou gla
1	Cou gla	T	0.55	1.15	0.55	0.425	1	1			2			2									0.312098	0.283725	0.56745	1.1349	1.70235	2.2698	2.83725	0.283725	0.312098	0.312098	0.312098	0.312098	0.312098	0	18	0	18	0	0	0.380607	0	6.85092	0	6.85092	0	0	Cou gla
1	Gre bic	T	1.65	1.5	2.2	0.925	1	1	3														4.43524	1.34401	2.68803	5.37605	8.06408	10.7521	13.4401	1.34401	2.68803	4.43524	4.43524	4.43524	4.43524	38	0	0	0	0	0	7.15362	271.837	0	0	0	0	0	Gre bic
1	Gre bic	T	0.6	0.75	0.95	0.425	1	1	4														0.34047	0.283725	0.56745	1.1349	1.70235	2.2698	2.83725	0.283725	0.34047	0.34047	0.34047	0.34047	0.34047	63	0	0	0	0	0	0.920189	57.9719	0	0	0	0	0	Gre bic
1	Gre bic	T	1.2	1.77	1.16	0.7325	3	3	2														0.673582	0.539879	0.670464	0.873162	2.94692	9.23057	22.0629	0.539879	0.670464	0.673582	0.673582	0.673582	0.673582	18	0	0	0	0	0	0.821442	14.786	0	0	0	0	0	Gre bic
1	Gre bic	T	1.5	2.05	1.85	0.975	1	1	3														4.47971	1.49324	2.98648	5.97295	8.95943	11.9459	14.9324	1.49324	2.98648	4.47971	4.47971	4.47971	4.47971	38	0	0	0	0	0	7.22535	274.563	0	0	0	0	0	Gre bic
1	Gre bic	T	0.7	1.05	1	0.5125	1	1	3	2		1											0.577611	0.412579	0.825159	1.65032	2.47548	3.30064	4.12579	0.412579	0.577611	0.577611	0.577611	0.577611	0.577611	38	0	5.5	0	0	0	0.931631	35.402	0	3.36176	0	0	0	Gre bic
1	Gre bic	T	1.1	1.62	1.65	0.8175	2	2	2														0.769064	0.0722261	0.577809	4.62247	15.6008	36.9798	72.2261	0.0722261	0.577809	0.769064	0.769064	0.769064	0.769064	18	0	0	0	0	0	0.937883	16.8819	0	0	0	0	0	Gre bic
1	Cou gla	T	0.7	0.55	0.44	0.2475	1	1			3			2									0.13471	0.0962211	0.192442	0.384884	0.577327	0.769769	0.962211	0.0962211	0.13471	0.13471	0.13471	0.13471	0.13471	0	38	0	18	0	0	0.217273	0	8.25639	0	2.95704	0	0	Cou gla
1	Cou gla	T	0.6	0.7	0.5	0.3	1	1						2									0.169646	0.141372	0.282743	0.565487	0.84823	1.13097	1.41372	0.141372	0.169646	0.169646	0.169646	0.169646	0.169646	0	0	0	18	0	0	0.169646	0	0	0	3.72394	0	0	Cou gla
1	Dic cin	T	0.4	0.7	0.35	0.2625	3	3															0.0288345	0.0292851	0.126151	1.87424	7.94751	21.0492	43.8825	0.0288345	0.0288345	0.0288345	0.0288345	0.0288345	0.0288345	0	0	0	0	0	0	0.0288345	0	0	0	0	0	0	Dic cin
1	Gre bic	T	0.05	1.2	1.23	0.6075	1	1	2			2											0.0579712	0.579712	1.15942	2.31885	3.47827	4.6377	5.79712	0.0579712	0.0579712	0.0579712	0.0579712	0.0579712	0.0579712	18	0	18	0	0	0	0.0706966	1.27254	0	1.27254	0	0	0	Gre bic
1	Cou gla	T	0.7	0.9	0.68	0.395	3	3			2			1									0.114258	0.111593	0.123252	0.846108	4.16725	12.0854	26.5991	0.111593	0.114258	0.114258	0.114258	0.114258	0.114258	0	18	0	5.5	0	0	0.139339	0	2.5081	0	0.664993	0	0	Cou gla
1	Cou gla	T	0.9	0.98	1.25	0.5575	2	2			2			2									0.292635	0.0501775	0.40142	3.21136	10.8383	25.6909	50.1775	0.0501775	0.292635	0.292635	0.292635	0.292635	0.292635	0	18	0	18	0	0	0.356872	0	6.4237	0	6.4237	0	0	Cou gla
1	Gre bic	T	1.7	2.02	1.65	0.9175	1	1	2														4.49584	1.32231	2.64461	5.28922	7.93384	10.5784	13.2231	1.32231	2.64461	4.49584	4.49584	4.49584	4.49584	18	0	0	0	0	0	5.48273	98.6892	0	0	0	0	0	Gre bic
1	Cou gla	T	0.6	0.8	1	0.45	1	1			2			2									0.381704	0.318086	0.636173	1.27235	1.90852	2.54469	3.18086	0.318086	0.381704	0.381704	0.381704	0.381704	0.381704	0	18	0	18	0	0	0.465492	0	8.37886	0	8.37886	0	0	Cou gla
1	Cou gla	T	0.95	1.3	1.1	0.6	1	1			2			1									1.07442	0.565487	1.13097	2.26195	3.39292	4.52389	5.65487	0.565487	1.07442	1.07442	1.07442	1.07442	1.07442	0	18	0	5.5	0	0	1.31027	0	23.5849	0	6.25327	0	0	Cou gla
1	Cou gla	T	0.9	1.15	0.68	0.4575	1	1			2			1									0.591799	0.328777	0.657555	1.31511	1.97266	2.63022	3.28777	0.328777	0.591799	0.591799	0.591799	0.591799	0.591799	0	18	0	5.5	0	0	0.721707	0	12.9907	0	3.44434	0	0	Cou gla
1	Ere amo	T	0.5	0.86	0.65	0.3775	1	1			2												0.223848	0.223848	0.447697	0.895393	1.34309	1.79079	2.23848	0.223848	0.223848	0.223848	0.223848	0.223848	0.223848	0	18	0	0	0	0	0.272986	0	4.91374	0	0	0	0	Ere amo
1	Gre bic	T	1.5	2.1	2.3	1.1	1	1	2														5.70199	1.90066	3.80133	7.60265	11.404	15.2053	19.0066	1.90066	3.80133	5.70199	5.70199	5.70199	5.70199	18	0	0	0	0	0	6.95365	125.166	0	0	0	0	0	Gre bic
1	Cou gla	T	0.7	0.9	0.98	0.47	1	1			2			1									0.485784	0.346989	0.693978	1.38796	2.08193	2.77591	3.46989	0.346989	0.485784	0.485784	0.485784	0.485784	0.485784	0	18	0	5.5	0	0	0.59242	0	10.6636	0	2.82732	0	0	Cou gla
1	Cou gla	T	0.25	0.45	0.35	0.2	1	1						1									0.0314159	0.0628319	0.125664	0.251327	0.376991	0.502655	0.628319	0.0314159	0.0314159	0.0314159	0.0314159	0.0314159	0.0314159	0	0	0	5.5	0	0	0.0314159	0	0	0	0.182844	0	0	Cou gla
1	Cou gla	T	0.5	1.15	1.25	0.6	1	1			2			1									0.565487	0.565487	1.13097	2.26195	3.39292	4.52389	5.65487	0.565487	0.565487	0.565487	0.565487	0.565487	0.565487	0	18	0	5.5	0	0	0.689618	0	12.4131	0	3.29119	0	0	Cou gla
1	Cou gla	T	0.4	0.4	0.05	0.1125	3	3						1									0.00529614	0.00537889	0.0231706	0.344249	1.45975	3.86618	8.06006	0.00529614	0.00529614	0.00529614	0.00529614	0.00529614	0.00529614	0	0	0	5.5	0	0	0.00529614	0	0	0	0.0308241	0	0	Cou gla
1	Cou gla	T	0.8	1.1	1.25	0.5875	1	1						1									0.867472	0.54217	1.08434	2.16868	3.25302	4.33736	5.4217	0.54217	0.867472	0.867472	0.867472	0.867472	0.867472	0	0	0	5.5	0	0	0.867472	0	0	0	5.04878	0	0	Cou gla
1	Cou gla	T	0.8	1.1	0.9	0.5	3	3			1			1									0.20923	0.198196	0.212499	0.915382	4.56056	13.6	30.4855	0.198196	0.20923	0.20923	0.20923	0.20923	0.20923	0	5.5	0	5.5	0	0	0.221407	0	1.21774	0	1.21774	0	0	Cou gla
1	Cou gla	T	0.8	1.1	0.6	0.425	3	3			2			1									0.151169	0.143197	0.153531	0.661363	3.29501	9.82597	22.0258	0.143197	0.151169	0.151169	0.151169	0.151169	0.151169	0	18	0	5.5	0	0	0.184352	0	3.31834	0	0.879818	0	0	Cou gla
1	Gre lep	T	1.1	0.95	1.03	0.495	3	3			1												0.281966	0.236208	0.281754	0.436402	1.73501	5.44866	12.8484	0.236208	0.281754	0.281966	0.281966	0.281966	0.281966	0	5.5	0	0	0	0	0.298377	0	1.64107	0	0	0	0	Gre lep
1	Gre bic	T	1	0.9	0.9	0.45	1	1	4			1											0.636173	0.318086	0.636173	1.27235	1.90852	2.54469	3.18086	0.318086	0.636173	0.636173	0.636173	0.636173	0.636173	63	0	5.5	0	0	0	1.71939	108.321	0	3.70259	0	0	0	Gre bic
1	Cou gla	T	0.5	1.2	0.9	0.525	1	1			2												0.432951	0.432951	0.865901	1.7318	2.5977	3.46361	4.32951	0.432951	0.432951	0.432951	0.432951	0.432951	0.432951	0	18	0	0	0	0	0.527989	0	9.5038	0	0	0	0	Cou gla
1	Cou gla	T	0.9	1.05	0.98	0.5075	1	1			1			1									0.728223	0.404568	0.809137	1.61827	2.42741	3.23655	4.04568	0.404568	0.728223	0.728223	0.728223	0.728223	0.728223	0	5.5	0	5.5	0	0	0.770606	0	4.23834	0	4.23834	0	0	Cou gla
1	Gre bic	T	1.05	1.4	0.68	0.52	1	1			1												0.891961	0.424743	0.849487	1.69897	2.54846	3.39795	4.24743	0.424743	0.849487	0.891961	0.891961	0.891961	0.891961	0	5.5	0	0	0	0	0.943874	0	5.19131	0	0	0	0	Gre bic
1	Cou gla	T	0.6	0.3	0.37	0.1675	3	3			2												0.0176106	0.0175291	0.0228286	0.241331	1.14469	3.22209	6.96272	0.0175291	0.0176106	0.0176106	0.0176106	0.0176106	0.0176106	0	18	0	0	0	0	0.0214764	0	0.386575	0	0	0	0	Cou gla
						#DIV/0!		#DIV/0!															#DIV/0!	#DIV/0!	#DIV/0!	#DIV/0!	#DIV/0!	#DIV/0!	#DIV/0!	#DIV/0!	#DIV/0!	#DIV/0!	#DIV/0!	#DIV/0!	#DIV/0!	0	0	0	0	0	0	#DIV/0!	#DIV/0!	#DIV/0!	#DIV/0!	#DIV/0!	#DIV/0!	#DIV/0!	0
						#DIV/0!		#DIV/0!															#DIV/0!	#DIV/0!	#DIV/0!	#DIV/0!	#DIV/0!	#DIV/0!	#DIV/0!	#DIV/0!	#DIV/0!	#DIV/0!	#DIV/0!	#DIV/0!	#DIV/0!	0	0	0	0	0	0	#DIV/0!	#DIV/0!	#DIV/0!	#DIV/0!	#DIV/0!	#DIV/0!	#DIV/0!	0
						#DIV/0!		#DIV/0!															#DIV/0!	#DIV/0!	#DIV/0!	#DIV/0!	#DIV/0!	#DIV/0!	#DIV/0!	#DIV/0!	#DIV/0!	#DIV/0!	#DIV/0!	#DIV/0!	#DIV/0!	0	0	0	0	0	0	#DIV/0!	#DIV/0!	#DIV/0!	#DIV/0!	#DIV/0!	#DIV/0!	#DIV/0!	0
						#DIV/0!		#DIV/0!															#DIV/0!	#DIV/0!	#DIV/0!	#DIV/0!	#DIV/0!	#DIV/0!	#DIV/0!	#DIV/0!	#DIV/0!	#DIV/0!	#DIV/0!	#DIV/0!	#DIV/0!	0	0	0	0	0	0	#DIV/0!	#DIV/0!	#DIV/0!	#DIV/0!	#DIV/0!	#DIV/0!	#DIV/0!	0
						#DIV/0!		#DIV/0!															#DIV/0!	#DIV/0!	#DIV/0!	#DIV/0!	#DIV/0!	#DIV/0!	#DIV/0!	#DIV/0!	#DIV/0!	#DIV/0!	#DIV/0!	#DIV/0!	#DIV/0!	0	0	0	0	0	0	#DIV/0!	#DIV/0!	#DIV/0!	#DIV/0!	#DIV/0!	#DIV/0!	#DIV/0!	0
						#DIV/0!		#DIV/0!															#DIV/0!	#DIV/0!	#DIV/0!	#DIV/0!	#DIV/0!	#DIV/0!	#DIV/0!	#DIV/0!	#DIV/0!	#DIV/0!	#DIV/0!	#DIV/0!	#DIV/0!	0	0	0	0	0	0	#DIV/0!	#DIV/0!	#DIV/0!	#DIV/0!	#DIV/0!	#DIV/0!	#DIV/0!	0
						#DIV/0!		#DIV/0!															#DIV/0!	#DIV/0!	#DIV/0!	#DIV/0!	#DIV/0!	#DIV/0!	#DIV/0!	#DIV/0!	#DIV/0!	#DIV/0!	#DIV/0!	#DIV/0!	#DIV/0!	0	0	0	0	0	0	#DIV/0!	#DIV/0!	#DIV/0!	#DIV/0!	#DIV/0!	#DIV/0!	#DIV/0!	0
						#DIV/0!		#DIV/0!															#DIV/0!	#DIV/0!	#DIV/0!	#DIV/0!	#DIV/0!	#DIV/0!	#DIV/0!	#DIV/0!	#DIV/0!	#DIV/0!	#DIV/0!	#DIV/0!	#DIV/0!	0	0	0	0	0	0	#DIV/0!	#DIV/0!	#DIV/0!	#DIV/0!	#DIV/0!	#DIV/0!	#DIV/0!	0
						#DIV/0!		#DIV/0!															#DIV/0!	#DIV/0!	#DIV/0!	#DIV/0!	#DIV/0!	#DIV/0!	#DIV/0!	#DIV/0!	#DIV/0!	#DIV/0!	#DIV/0!	#DIV/0!	#DIV/0!	0	0	0	0	0	0	#DIV/0!	#DIV/0!	#DIV/0!	#DIV/0!	#DIV/0!	#DIV/0!	#DIV/0!	0
						#DIV/0!		#DIV/0!															#DIV/0!	#DIV/0!	#DIV/0!	#DIV/0!	#DIV/0!	#DIV/0!	#DIV/0!	#DIV/0!	#DIV/0!	#DIV/0!	#DIV/0!	#DIV/0!	#DIV/0!	0	0	0	0	0	0	#DIV/0!	#DIV/0!	#DIV/0!	#DIV/0!	#DIV/0!	#DIV/0!	#DIV/0!	0
						#DIV/0!		#DIV/0!															#DIV/0!	#DIV/0!	#DIV/0!	#DIV/0!	#DIV/0!	#DIV/0!	#DIV/0!	#DIV/0!	#DIV/0!	#DIV/0!	#DIV/0!	#DIV/0!	#DIV/0!	0	0	0	0	0	0	#DIV/0!	#DIV/0!	#DIV/0!	#DIV/0!	#DIV/0!	#DIV/0!	#DIV/0!	0
						#DIV/0!		#DIV/0!															#DIV/0!	#DIV/0!	#DIV/0!	#DIV/0!	#DIV/0!	#DIV/0!	#DIV/0!	#DIV/0!	#DIV/0!	#DIV/0!	#DIV/0!	#DIV/0!	#DIV/0!	0	0	0	0	0	0	#DIV/0!	#DIV/0!	#DIV/0!	#DIV/0!	#DIV/0!	#DIV/0!	#DIV/0!	0
						#DIV/0!		#DIV/0!															#DIV/0!	#DIV/0!	#DIV/0!	#DIV/0!	#DIV/0!	#DIV/0!	#DIV/0!	#DIV/0!	#DIV/0!	#DIV/0!	#DIV/0!	#DIV/0!	#DIV/0!	0	0	0	0	0	0	#DIV/0!	#DIV/0!	#DIV/0!	#DIV/0!	#DIV/0!	#DIV/0!	#DIV/0!	0
						#DIV/0!		#DIV/0!															#DIV/0!	#DIV/0!	#DIV/0!	#DIV/0!	#DIV/0!	#DIV/0!	#DIV/0!	#DIV/0!	#DIV/0!	#DIV/0!	#DIV/0!	#DIV/0!	#DIV/0!	0	0	0	0	0	0	#DIV/0!	#DIV/0!	#DIV/0!	#DIV/0!	#DIV/0!	#DIV/0!	#DIV/0!	0
						#DIV/0!		#DIV/0!															#DIV/0!	#DIV/0!	#DIV/0!	#DIV/0!	#DIV/0!	#DIV/0!	#DIV/0!	#DIV/0!	#DIV/0!	#DIV/0!	#DIV/0!	#DIV/0!	#DIV/0!	0	0	0	0	0	0	#DIV/0!	#DIV/0!	#DIV/0!	#DIV/0!	#DIV/0!	#DIV/0!	#DIV/0!	0
						#DIV/0!		#DIV/0!															#DIV/0!	#DIV/0!	#DIV/0!	#DIV/0!	#DIV/0!	#DIV/0!	#DIV/0!	#DIV/0!	#DIV/0!	#DIV/0!	#DIV/0!	#DIV/0!	#DIV/0!	0	0	0	0	0	0	#DIV/0!	#DIV/0!	#DIV/0!	#DIV/0!	#DIV/0!	#DIV/0!	#DIV/0!	0
						#DIV/0!		#DIV/0!															#DIV/0!	#DIV/0!	#DIV/0!	#DIV/0!	#DIV/0!	#DIV/0!	#DIV/0!	#DIV/0!	#DIV/0!	#DIV/0!	#DIV/0!	#DIV/0!	#DIV/0!	0	0	0	0	0	0	#DIV/0!	#DIV/0!	#DIV/0!	#DIV/0!	#DIV/0!	#DIV/0!	#DIV/0!	0
						#DIV/0!		#DIV/0!															#DIV/0!	#DIV/0!	#DIV/0!	#DIV/0!	#DIV/0!	#DIV/0!	#DIV/0!	#DIV/0!	#DIV/0!	#DIV/0!	#DIV/0!	#DIV/0!	#DIV/0!	0	0	0	0	0	0	#DIV/0!	#DIV/0!	#DIV/0!	#DIV/0!	#DIV/0!	#DIV/0!	#DIV/0!	0
						#DIV/0!		#DIV/0!															#DIV/0!	#DIV/0!	#DIV/0!	#DIV/0!	#DIV/0!	#DIV/0!	#DIV/0!	#DIV/0!	#DIV/0!	#DIV/0!	#DIV/0!	#DIV/0!	#DIV/0!	0	0	0	0	0	0	#DIV/0!	#DIV/0!	#DIV/0!	#DIV/0!	#DIV/0!	#DIV/0!	#DIV/0!	0
						#DIV/0!		#DIV/0!															#DIV/0!	#DIV/0!	#DIV/0!	#DIV/0!	#DIV/0!	#DIV/0!	#DIV/0!	#DIV/0!	#DIV/0!	#DIV/0!	#DIV/0!	#DIV/0!	#DIV/0!	0	0	0	0	0	0	#DIV/0!	#DIV/0!	#DIV/0!	#DIV/0!	#DIV/0!	#DIV/0!	#DIV/0!	0
						#DIV/0!		#DIV/0!															#DIV/0!	#DIV/0!	#DIV/0!	#DIV/0!	#DIV/0!	#DIV/0!	#DIV/0!	#DIV/0!	#DIV/0!	#DIV/0!	#DIV/0!	#DIV/0!	#DIV/0!	0	0	0	0	0	0	#DIV/0!	#DIV/0!	#DIV/0!	#DIV/0!	#DIV/0!	#DIV/0!	#DIV/0!	0
						#DIV/0!		#DIV/0!															#DIV/0!	#DIV/0!	#DIV/0!	#DIV/0!	#DIV/0!	#DIV/0!	#DIV/0!	#DIV/0!	#DIV/0!	#DIV/0!	#DIV/0!	#DIV/0!	#DIV/0!	0	0	0	0	0	0	#DIV/0!	#DIV/0!	#DIV/0!	#DIV/0!	#DIV/0!	#DIV/0!	#DIV/0!	0
						#DIV/0!		#DIV/0!															#DIV/0!	#DIV/0!	#DIV/0!	#DIV/0!	#DIV/0!	#DIV/0!	#DIV/0!	#DIV/0!	#DIV/0!	#DIV/0!	#DIV/0!	#DIV/0!	#DIV/0!	0	0	0	0	0	0	#DIV/0!	#DIV/0!	#DIV/0!	#DIV/0!	#DIV/0!	#DIV/0!	#DIV/0!	0
						#DIV/0!		#DIV/0!															#DIV/0!	#DIV/0!	#DIV/0!	#DIV/0!	#DIV/0!	#DIV/0!	#DIV/0!	#DIV/0!	#DIV/0!	#DIV/0!	#DIV/0!	#DIV/0!	#DIV/0!	0	0	0	0	0	0	#DIV/0!	#DIV/0!	#DIV/0!	#DIV/0!	#DIV/0!	#DIV/0!	#DIV/0!	0
						#DIV/0!		#DIV/0!															#DIV/0!	#DIV/0!	#DIV/0!	#DIV/0!	#DIV/0!	#DIV/0!	#DIV/0!	#DIV/0!	#DIV/0!	#DIV/0!	#DIV/0!	#DIV/0!	#DIV/0!	0	0	0	0	0	0	#DIV/0!	#DIV/0!	#DIV/0!	#DIV/0!	#DIV/0!	#DIV/0!	#DIV/0!	0
						#DIV/0!		#DIV/0!															#DIV/0!	#DIV/0!	#DIV/0!	#DIV/0!	#DIV/0!	#DIV/0!	#DIV/0!	#DIV/0!	#DIV/0!	#DIV/0!	#DIV/0!	#DIV/0!	#DIV/0!	0	0	0	0	0	0	#DIV/0!	#DIV/0!	#DIV/0!	#DIV/0!	#DIV/0!	#DIV/0!	#DIV/0!	0
						#DIV/0!		#DIV/0!															#DIV/0!	#DIV/0!	#DIV/0!	#DIV/0!	#DIV/0!	#DIV/0!	#DIV/0!	#DIV/0!	#DIV/0!	#DIV/0!	#DIV/0!	#DIV/0!	#DIV/0!	0	0	0	0	0	0	#DIV/0!	#DIV/0!	#DIV/0!	#DIV/0!	#DIV/0!	#DIV/0!	#DIV/0!	0
						#DIV/0!		#DIV/0!															#DIV/0!	#DIV/0!	#DIV/0!	#DIV/0!	#DIV/0!	#DIV/0!	#DIV/0!	#DIV/0!	#DIV/0!	#DIV/0!	#DIV/0!	#DIV/0!	#DIV/0!	0	0	0	0	0	0	#DIV/0!	#DIV/0!	#DIV/0!	#DIV/0!	#DIV/0!	#DIV/0!	#DIV/0!	0
						#DIV/0!		#DIV/0!															#DIV/0!	#DIV/0!	#DIV/0!	#DIV/0!	#DIV/0!	#DIV/0!	#DIV/0!	#DIV/0!	#DIV/0!	#DIV/0!	#DIV/0!	#DIV/0!	#DIV/0!	0	0	0	0	0	0	#DIV/0!	#DIV/0!	#DIV/0!	#DIV/0!	#DIV/0!	#DIV/0!	#DIV/0!	0
						#DIV/0!		#DIV/0!															#DIV/0!	#DIV/0!	#DIV/0!	#DIV/0!	#DIV/0!	#DIV/0!	#DIV/0!	#DIV/0!	#DIV/0!	#DIV/0!	#DIV/0!	#DIV/0!	#DIV/0!	0	0	0	0	0	0	#DIV/0!	#DIV/0!	#DIV/0!	#DIV/0!	#DIV/0!	#DIV/0!	#DIV/0!	0
						#DIV/0!		#DIV/0!															#DIV/0!	#DIV/0!	#DIV/0!	#DIV/0!	#DIV/0!	#DIV/0!	#DIV/0!	#DIV/0!	#DIV/0!	#DIV/0!	#DIV/0!	#DIV/0!	#DIV/0!	0	0	0	0	0	0	#DIV/0!	#DIV/0!	#DIV/0!	#DIV/0!	#DIV/0!	#DIV/0!	#DIV/0!	0
						#DIV/0!		#DIV/0!															#DIV/0!	#DIV/0!	#DIV/0!	#DIV/0!	#DIV/0!	#DIV/0!	#DIV/0!	#DIV/0!	#DIV/0!	#DIV/0!	#DIV/0!	#DIV/0!	#DIV/0!	0	0	0	0	0	0	#DIV/0!	#DIV/0!	#DIV/0!	#DIV/0!	#DIV/0!	#DIV/0!	#DIV/0!	0
						#DIV/0!		#DIV/0!															#DIV/0!	#DIV/0!	#DIV/0!	#DIV/0!	#DIV/0!	#DIV/0!	#DIV/0!	#DIV/0!	#DIV/0!	#DIV/0!	#DIV/0!	#DIV/0!	#DIV/0!	0	0	0	0	0	0	#DIV/0!	#DIV/0!	#DIV/0!	#DIV/0!	#DIV/0!	#DIV/0!	#DIV/0!	0
						#DIV/0!		#DIV/0!															#DIV/0!	#DIV/0!	#DIV/0!	#DIV/0!	#DIV/0!	#DIV/0!	#DIV/0!	#DIV/0!	#DIV/0!	#DIV/0!	#DIV/0!	#DIV/0!	#DIV/0!	0	0	0	0	0	0	#DIV/0!	#DIV/0!	#DIV/0!	#DIV/0!	#DIV/0!	#DIV/0!	#DIV/0!	0
						#DIV/0!		#DIV/0!															#DIV/0!	#DIV/0!	#DIV/0!	#DIV/0!	#DIV/0!	#DIV/0!	#DIV/0!	#DIV/0!	#DIV/0!	#DIV/0!	#DIV/0!	#DIV/0!	#DIV/0!	0	0	0	0	0	0	#DIV/0!	#DIV/0!	#DIV/0!	#DIV/0!	#DIV/0!	#DIV/0!	#DIV/0!	0
						#DIV/0!		#DIV/0!															#DIV/0!	#DIV/0!	#DIV/0!	#DIV/0!	#DIV/0!	#DIV/0!	#DIV/0!	#DIV/0!	#DIV/0!	#DIV/0!	#DIV/0!	#DIV/0!	#DIV/0!	0	0	0	0	0	0	#DIV/0!	#DIV/0!	#DIV/0!	#DIV/0!	#DIV/0!	#DIV/0!	#DIV/0!	0
						#DIV/0!		#DIV/0!															#DIV/0!	#DIV/0!	#DIV/0!	#DIV/0!	#DIV/0!	#DIV/0!	#DIV/0!	#DIV/0!	#DIV/0!	#DIV/0!	#DIV/0!	#DIV/0!	#DIV/0!	0	0	0	0	0	0	#DIV/0!	#DIV/0!	#DIV/0!	#DIV/0!	#DIV/0!	#DIV/0!	#DIV/0!	0
						#DIV/0!		#DIV/0!															#DIV/0!	#DIV/0!	#DIV/0!	#DIV/0!	#DIV/0!	#DIV/0!	#DIV/0!	#DIV/0!	#DIV/0!	#DIV/0!	#DIV/0!	#DIV/0!	#DIV/0!	0	0	0	0	0	0	#DIV/0!	#DIV/0!	#DIV/0!	#DIV/0!	#DIV/0!	#DIV/0!	#DIV/0!	0
						#DIV/0!		#DIV/0!															#DIV/0!	#DIV/0!	#DIV/0!	#DIV/0!	#DIV/0!	#DIV/0!	#DIV/0!	#DIV/0!	#DIV/0!	#DIV/0!	#DIV/0!	#DIV/0!	#DIV/0!	0	0	0	0	0	0	#DIV/0!	#DIV/0!	#DIV/0!	#DIV/0!	#DIV/0!	#DIV/0!	#DIV/0!	0
						#DIV/0!		#DIV/0!															#DIV/0!	#DIV/0!	#DIV/0!	#DIV/0!	#DIV/0!	#DIV/0!	#DIV/0!	#DIV/0!	#DIV/0!	#DIV/0!	#DIV/0!	#DIV/0!	#DIV/0!	0	0	0	0	0	0	#DIV/0!	#DIV/0!	#DIV/0!	#DIV/0!	#DIV/0!	#DIV/0!	#DIV/0!	0
						#DIV/0!		#DIV/0!															#DIV/0!	#DIV/0!	#DIV/0!	#DIV/0!	#DIV/0!	#DIV/0!	#DIV/0!	#DIV/0!	#DIV/0!	#DIV/0!	#DIV/0!	#DIV/0!	#DIV/0!	0	0	0	0	0	0	#DIV/0!	#DIV/0!	#DIV/0!	#DIV/0!	#DIV/0!	#DIV/0!	#DIV/0!	0
						#DIV/0!		#DIV/0!															#DIV/0!	#DIV/0!	#DIV/0!	#DIV/0!	#DIV/0!	#DIV/0!	#DIV/0!	#DIV/0!	#DIV/0!	#DIV/0!	#DIV/0!	#DIV/0!	#DIV/0!	0	0	0	0	0	0	#DIV/0!	#DIV/0!	#DIV/0!	#DIV/0!	#DIV/0!	#DIV/0!	#DIV/0!	0
						#DIV/0!		#DIV/0!															#DIV/0!	#DIV/0!	#DIV/0!	#DIV/0!	#DIV/0!	#DIV/0!	#DIV/0!	#DIV/0!	#DIV/0!	#DIV/0!	#DIV/0!	#DIV/0!	#DIV/0!	0	0	0	0	0	0	#DIV/0!	#DIV/0!	#DIV/0!	#DIV/0!	#DIV/0!	#DIV/0!	#DIV/0!	0
						#DIV/0!		#DIV/0!															#DIV/0!	#DIV/0!	#DIV/0!	#DIV/0!	#DIV/0!	#DIV/0!	#DIV/0!	#DIV/0!	#DIV/0!	#DIV/0!	#DIV/0!	#DIV/0!	#DIV/0!	0	0	0	0	0	0	#DIV/0!	#DIV/0!	#DIV/0!	#DIV/0!	#DIV/0!	#DIV/0!	#DIV/0!	0
						#DIV/0!		#DIV/0!															#DIV/0!	#DIV/0!	#DIV/0!	#DIV/0!	#DIV/0!	#DIV/0!	#DIV/0!	#DIV/0!	#DIV/0!	#DIV/0!	#DIV/0!	#DIV/0!	#DIV/0!	0	0	0	0	0	0	#DIV/0!	#DIV/0!	#DIV/0!	#DIV/0!	#DIV/0!	#DIV/0!	#DIV/0!	0
						#DIV/0!		#DIV/0!															#DIV/0!	#DIV/0!	#DIV/0!	#DIV/0!	#DIV/0!	#DIV/0!	#DIV/0!	#DIV/0!	#DIV/0!	#DIV/0!	#DIV/0!	#DIV/0!	#DIV/0!	0	0	0	0	0	0	#DIV/0!	#DIV/0!	#DIV/0!	#DIV/0!	#DIV/0!	#DIV/0!	#DIV/0!	0
						#DIV/0!		#DIV/0!															#DIV/0!	#DIV/0!	#DIV/0!	#DIV/0!	#DIV/0!	#DIV/0!	#DIV/0!	#DIV/0!	#DIV/0!	#DIV/0!	#DIV/0!	#DIV/0!	#DIV/0!	0	0	0	0	0	0	#DIV/0!	#DIV/0!	#DIV/0!	#DIV/0!	#DIV/0!	#DIV/0!	#DIV/0!	0
						#DIV/0!		#DIV/0!															#DIV/0!	#DIV/0!	#DIV/0!	#DIV/0!	#DIV/0!	#DIV/0!	#DIV/0!	#DIV/0!	#DIV/0!	#DIV/0!	#DIV/0!	#DIV/0!	#DIV/0!	0	0	0	0	0	0	#DIV/0!	#DIV/0!	#DIV/0!	#DIV/0!	#DIV/0!	#DIV/0!	#DIV/0!	0
						#DIV/0!		#DIV/0!															#DIV/0!	#DIV/0!	#DIV/0!	#DIV/0!	#DIV/0!	#DIV/0!	#DIV/0!	#DIV/0!	#DIV/0!	#DIV/0!	#DIV/0!	#DIV/0!	#DIV/0!	0	0	0	0	0	0	#DIV/0!	#DIV/0!	#DIV/0!	#DIV/0!	#DIV/0!	#DIV/0!	#DIV/0!	0
						#DIV/0!		#DIV/0!															#DIV/0!	#DIV/0!	#DIV/0!	#DIV/0!	#DIV/0!	#DIV/0!	#DIV/0!	#DIV/0!	#DIV/0!	#DIV/0!	#DIV/0!	#DIV/0!	#DIV/0!	0	0	0	0	0	0	#DIV/0!	#DIV/0!	#DIV/0!	#DIV/0!	#DIV/0!	#DIV/0!	#DIV/0!	0
						#DIV/0!		#DIV/0!															#DIV/0!	#DIV/0!	#DIV/0!	#DIV/0!	#DIV/0!	#DIV/0!	#DIV/0!	#DIV/0!	#DIV/0!	#DIV/0!	#DIV/0!	#DIV/0!	#DIV/0!	0	0	0	0	0	0	#DIV/0!	#DIV/0!	#DIV/0!	#DIV/0!	#DIV/0!	#DIV/0!	#DIV/0!	0
						#DIV/0!		#DIV/0!															#DIV/0!	#DIV/0!	#DIV/0!	#DIV/0!	#DIV/0!	#DIV/0!	#DIV/0!	#DIV/0!	#DIV/0!	#DIV/0!	#DIV/0!	#DIV/0!	#DIV/0!	0	0	0	0	0	0	#DIV/0!	#DIV/0!	#DIV/0!	#DIV/0!	#DIV/0!	#DIV/0!	#DIV/0!	0
						#DIV/0!		#DIV/0!															#DIV/0!	#DIV/0!	#DIV/0!	#DIV/0!	#DIV/0!	#DIV/0!	#DIV/0!	#DIV/0!	#DIV/0!	#DIV/0!	#DIV/0!	#DIV/0!	#DIV/0!	0	0	0	0	0	0	#DIV/0!	#DIV/0!	#DIV/0!	#DIV/0!	#DIV/0!	#DIV/0!	#DIV/0!	0
						#DIV/0!		#DIV/0!															#DIV/0!	#DIV/0!	#DIV/0!	#DIV/0!	#DIV/0!	#DIV/0!	#DIV/0!	#DIV/0!	#DIV/0!	#DIV/0!	#DIV/0!	#DIV/0!	#DIV/0!	0	0	0	0	0	0	#DIV/0!	#DIV/0!	#DIV/0!	#DIV/0!	#DIV/0!	#DIV/0!	#DIV/0!	0
						#DIV/0!		#DIV/0!															#DIV/0!	#DIV/0!	#DIV/0!	#DIV/0!	#DIV/0!	#DIV/0!	#DIV/0!	#DIV/0!	#DIV/0!	#DIV/0!	#DIV/0!	#DIV/0!	#DIV/0!	0	0	0	0	0	0	#DIV/0!	#DIV/0!	#DIV/0!	#DIV/0!	#DIV/0!	#DIV/0!	#DIV/0!	0
						#DIV/0!		#DIV/0!															#DIV/0!	#DIV/0!	#DIV/0!	#DIV/0!	#DIV/0!	#DIV/0!	#DIV/0!	#DIV/0!	#DIV/0!	#DIV/0!	#DIV/0!	#DIV/0!	#DIV/0!	0	0	0	0	0	0	#DIV/0!	#DIV/0!	#DIV/0!	#DIV/0!	#DIV/0!	#DIV/0!	#DIV/0!	0
						#DIV/0!		#DIV/0!															#DIV/0!	#DIV/0!	#DIV/0!	#DIV/0!	#DIV/0!	#DIV/0!	#DIV/0!	#DIV/0!	#DIV/0!	#DIV/0!	#DIV/0!	#DIV/0!	#DIV/0!	0	0	0	0	0	0	#DIV/0!	#DIV/0!	#DIV/0!	#DIV/0!	#DIV/0!	#DIV/0!	#DIV/0!	0
						#DIV/0!		#DIV/0!															#DIV/0!	#DIV/0!	#DIV/0!	#DIV/0!	#DIV/0!	#DIV/0!	#DIV/0!	#DIV/0!	#DIV/0!	#DIV/0!	#DIV/0!	#DIV/0!	#DIV/0!	0	0	0	0	0	0	#DIV/0!	#DIV/0!	#DIV/0!	#DIV/0!	#DIV/0!	#DIV/0!	#DIV/0!	0
						#DIV/0!		#DIV/0!															#DIV/0!	#DIV/0!	#DIV/0!	#DIV/0!	#DIV/0!	#DIV/0!	#DIV/0!	#DIV/0!	#DIV/0!	#DIV/0!	#DIV/0!	#DIV/0!	#DIV/0!	0	0	0	0	0	0	#DIV/0!	#DIV/0!	#DIV/0!	#DIV/0!	#DIV/0!	#DIV/0!	#DIV/0!	0
						#DIV/0!		#DIV/0!															#DIV/0!	#DIV/0!	#DIV/0!	#DIV/0!	#DIV/0!	#DIV/0!	#DIV/0!	#DIV/0!	#DIV/0!	#DIV/0!	#DIV/0!	#DIV/0!	#DIV/0!	0	0	0	0	0	0	#DIV/0!	#DIV/0!	#DIV/0!	#DIV/0!	#DIV/0!	#DIV/0!	#DIV/0!	0
						#DIV/0!		#DIV/0!															#DIV/0!	#DIV/0!	#DIV/0!	#DIV/0!	#DIV/0!	#DIV/0!	#DIV/0!	#DIV/0!	#DIV/0!	#DIV/0!	#DIV/0!	#DIV/0!	#DIV/0!	0	0	0	0	0	0	#DIV/0!	#DIV/0!	#DIV/0!	#DIV/0!	#DIV/0!	#DIV/0!	#DIV/0!	0
						#DIV/0!		#DIV/0!															#DIV/0!	#DIV/0!	#DIV/0!	#DIV/0!	#DIV/0!	#DIV/0!	#DIV/0!	#DIV/0!	#DIV/0!	#DIV/0!	#DIV/0!	#DIV/0!	#DIV/0!	0	0	0	0	0	0	#DIV/0!	#DIV/0!	#DIV/0!	#DIV/0!	#DIV/0!	#DIV/0!	#DIV/0!	0
						#DIV/0!		#DIV/0!															#DIV/0!	#DIV/0!	#DIV/0!	#DIV/0!	#DIV/0!	#DIV/0!	#DIV/0!	#DIV/0!	#DIV/0!	#DIV/0!	#DIV/0!	#DIV/0!	#DIV/0!	0	0	0	0	0	0	#DIV/0!	#DIV/0!	#DIV/0!	#DIV/0!	#DIV/0!	#DIV/0!	#DIV/0!	0
						#DIV/0!		#DIV/0!															#DIV/0!	#DIV/0!	#DIV/0!	#DIV/0!	#DIV/0!	#DIV/0!	#DIV/0!	#DIV/0!	#DIV/0!	#DIV/0!	#DIV/0!	#DIV/0!	#DIV/0!	0	0	0	0	0	0	#DIV/0!	#DIV/0!	#DIV/0!	#DIV/0!	#DIV/0!	#DIV/0!	#DIV/0!	0
						#DIV/0!		#DIV/0!															#DIV/0!	#DIV/0!	#DIV/0!	#DIV/0!	#DIV/0!	#DIV/0!	#DIV/0!	#DIV/0!	#DIV/0!	#DIV/0!	#DIV/0!	#DIV/0!	#DIV/0!	0	0	0	0	0	0	#DIV/0!	#DIV/0!	#DIV/0!	#DIV/0!	#DIV/0!	#DIV/0!	#DIV/0!	0
						#DIV/0!		#DIV/0!															#DIV/0!	#DIV/0!	#DIV/0!	#DIV/0!	#DIV/0!	#DIV/0!	#DIV/0!	#DIV/0!	#DIV/0!	#DIV/0!	#DIV/0!	#DIV/0!	#DIV/0!	0	0	0	0	0	0	#DIV/0!	#DIV/0!	#DIV/0!	#DIV/0!	#DIV/0!	#DIV/0!	#DIV/0!	0
						#DIV/0!		#DIV/0!															#DIV/0!	#DIV/0!	#DIV/0!	#DIV/0!	#DIV/0!	#DIV/0!	#DIV/0!	#DIV/0!	#DIV/0!	#DIV/0!	#DIV/0!	#DIV/0!	#DIV/0!	0	0	0	0	0	0	#DIV/0!	#DIV/0!	#DIV/0!	#DIV/0!	#DIV/0!	#DIV/0!	#DIV/0!	0
						#DIV/0!		#DIV/0!															#DIV/0!	#DIV/0!	#DIV/0!	#DIV/0!	#DIV/0!	#DIV/0!	#DIV/0!	#DIV/0!	#DIV/0!	#DIV/0!	#DIV/0!	#DIV/0!	#DIV/0!	0	0	0	0	0	0	#DIV/0!	#DIV/0!	#DIV/0!	#DIV/0!	#DIV/0!	#DIV/0!	#DIV/0!	0
						#DIV/0!		#DIV/0!															#DIV/0!	#DIV/0!	#DIV/0!	#DIV/0!	#DIV/0!	#DIV/0!	#DIV/0!	#DIV/0!	#DIV/0!	#DIV/0!	#DIV/0!	#DIV/0!	#DIV/0!	0	0	0	0	0	0	#DIV/0!	#DIV/0!	#DIV/0!	#DIV/0!	#DIV/0!	#DIV/0!	#DIV/0!	0
						#DIV/0!		#DIV/0!															#DIV/0!	#DIV/0!	#DIV/0!	#DIV/0!	#DIV/0!	#DIV/0!	#DIV/0!	#DIV/0!	#DIV/0!	#DIV/0!	#DIV/0!	#DIV/0!	#DIV/0!	0	0	0	0	0	0	#DIV/0!	#DIV/0!	#DIV/0!	#DIV/0!	#DIV/0!	#DIV/0!	#DIV/0!	0
						#DIV/0!		#DIV/0!															#DIV/0!	#DIV/0!	#DIV/0!	#DIV/0!	#DIV/0!	#DIV/0!	#DIV/0!	#DIV/0!	#DIV/0!	#DIV/0!	#DIV/0!	#DIV/0!	#DIV/0!	0	0	0	0	0	0	#DIV/0!	#DIV/0!	#DIV/0!	#DIV/0!	#DIV/0!	#DIV/0!	#DIV/0!	0
						#DIV/0!		#DIV/0!															#DIV/0!	#DIV/0!	#DIV/0!	#DIV/0!	#DIV/0!	#DIV/0!	#DIV/0!	#DIV/0!	#DIV/0!	#DIV/0!	#DIV/0!	#DIV/0!	#DIV/0!	0	0	0	0	0	0	#DIV/0!	#DIV/0!	#DIV/0!	#DIV/0!	#DIV/0!	#DIV/0!	#DIV/0!	0
						#DIV/0!		#DIV/0!															#DIV/0!	#DIV/0!	#DIV/0!	#DIV/0!	#DIV/0!	#DIV/0!	#DIV/0!	#DIV/0!	#DIV/0!	#DIV/0!	#DIV/0!	#DIV/0!	#DIV/0!	0	0	0	0	0	0	#DIV/0!	#DIV/0!	#DIV/0!	#DIV/0!	#DIV/0!	#DIV/0!	#DIV/0!	0
						#DIV/0!		#DIV/0!															#DIV/0!	#DIV/0!	#DIV/0!	#DIV/0!	#DIV/0!	#DIV/0!	#DIV/0!	#DIV/0!	#DIV/0!	#DIV/0!	#DIV/0!	#DIV/0!	#DIV/0!	0	0	0	0	0	0	#DIV/0!	#DIV/0!	#DIV/0!	#DIV/0!	#DIV/0!	#DIV/0!	#DIV/0!	0
						#DIV/0!		#DIV/0!															#DIV/0!	#DIV/0!	#DIV/0!	#DIV/0!	#DIV/0!	#DIV/0!	#DIV/0!	#DIV/0!	#DIV/0!	#DIV/0!	#DIV/0!	#DIV/0!	#DIV/0!	0	0	0	0	0	0	#DIV/0!	#DIV/0!	#DIV/0!	#DIV/0!	#DIV/0!	#DIV/0!	#DIV/0!	0
						#DIV/0!		#DIV/0!															#DIV/0!	#DIV/0!	#DIV/0!	#DIV/0!	#DIV/0!	#DIV/0!	#DIV/0!	#DIV/0!	#DIV/0!	#DIV/0!	#DIV/0!	#DIV/0!	#DIV/0!	0	0	0	0	0	0	#DIV/0!	#DIV/0!	#DIV/0!	#DIV/0!	#DIV/0!	#DIV/0!	#DIV/0!	0
						#DIV/0!		#DIV/0!															#DIV/0!	#DIV/0!	#DIV/0!	#DIV/0!	#DIV/0!	#DIV/0!	#DIV/0!	#DIV/0!	#DIV/0!	#DIV/0!	#DIV/0!	#DIV/0!	#DIV/0!	0	0	0	0	0	0	#DIV/0!	#DIV/0!	#DIV/0!	#DIV/0!	#DIV/0!	#DIV/0!	#DIV/0!	0
						#DIV/0!		#DIV/0!															#DIV/0!	#DIV/0!	#DIV/0!	#DIV/0!	#DIV/0!	#DIV/0!	#DIV/0!	#DIV/0!	#DIV/0!	#DIV/0!	#DIV/0!	#DIV/0!	#DIV/0!	0	0	0	0	0	0	#DIV/0!	#DIV/0!	#DIV/0!	#DIV/0!	#DIV/0!	#DIV/0!	#DIV/0!	0
						#DIV/0!		#DIV/0!															#DIV/0!	#DIV/0!	#DIV/0!	#DIV/0!	#DIV/0!	#DIV/0!	#DIV/0!	#DIV/0!	#DIV/0!	#DIV/0!	#DIV/0!	#DIV/0!	#DIV/0!	0	0	0	0	0	0	#DIV/0!	#DIV/0!	#DIV/0!	#DIV/0!	#DIV/0!	#DIV/0!	#DIV/0!	0
						#DIV/0!		#DIV/0!															#DIV/0!	#DIV/0!	#DIV/0!	#DIV/0!	#DIV/0!	#DIV/0!	#DIV/0!	#DIV/0!	#DIV/0!	#DIV/0!	#DIV/0!	#DIV/0!	#DIV/0!	0	0	0	0	0	0	#DIV/0!	#DIV/0!	#DIV/0!	#DIV/0!	#DIV/0!	#DIV/0!	#DIV/0!	0
						#DIV/0!		#DIV/0!															#DIV/0!	#DIV/0!	#DIV/0!	#DIV/0!	#DIV/0!	#DIV/0!	#DIV/0!	#DIV/0!	#DIV/0!	#DIV/0!	#DIV/0!	#DIV/0!	#DIV/0!	0	0	0	0	0	0	#DIV/0!	#DIV/0!	#DIV/0!	#DIV/0!	#DIV/0!	#DIV/0!	#DIV/0!	0
						#DIV/0!		#DIV/0!															#DIV/0!	#DIV/0!	#DIV/0!	#DIV/0!	#DIV/0!	#DIV/0!	#DIV/0!	#DIV/0!	#DIV/0!	#DIV/0!	#DIV/0!	#DIV/0!	#DIV/0!	0	0	0	0	0	0	#DIV/0!	#DIV/0!	#DIV/0!	#DIV/0!	#DIV/0!	#DIV/0!	#DIV/0!	0
						#DIV/0!		#DIV/0!															#DIV/0!	#DIV/0!	#DIV/0!	#DIV/0!	#DIV/0!	#DIV/0!	#DIV/0!	#DIV/0!	#DIV/0!	#DIV/0!	#DIV/0!	#DIV/0!	#DIV/0!	0	0	0	0	0	0	#DIV/0!	#DIV/0!	#DIV/0!	#DIV/0!	#DIV/0!	#DIV/0!	#DIV/0!	0
						#DIV/0!		#DIV/0!															#DIV/0!	#DIV/0!	#DIV/0!	#DIV/0!	#DIV/0!	#DIV/0!	#DIV/0!	#DIV/0!	#DIV/0!	#DIV/0!	#DIV/0!	#DIV/0!	#DIV/0!	0	0	0	0	0	0	#DIV/0!	#DIV/0!	#DIV/0!	#DIV/0!	#DIV/0!	#DIV/0!	#DIV/0!	0
						#DIV/0!		#DIV/0!															#DIV/0!	#DIV/0!	#DIV/0!	#DIV/0!	#DIV/0!	#DIV/0!	#DIV/0!	#DIV/0!	#DIV/0!	#DIV/0!	#DIV/0!	#DIV/0!	#DIV/0!	0	0	0	0	0	0	#DIV/0!	#DIV/0!	#DIV/0!	#DIV/0!	#DIV/0!	#DIV/0!	#DIV/0!	0
						#DIV/0!		#DIV/0!															#DIV/0!	#DIV/0!	#DIV/0!	#DIV/0!	#DIV/0!	#DIV/0!	#DIV/0!	#DIV/0!	#DIV/0!	#DIV/0!	#DIV/0!	#DIV/0!	#DIV/0!	0	0	0	0	0	0	#DIV/0!	#DIV/0!	#DIV/0!	#DIV/0!	#DIV/0!	#DIV/0!	#DIV/0!	0
						#DIV/0!		#DIV/0!															#DIV/0!	#DIV/0!	#DIV/0!	#DIV/0!	#DIV/0!	#DIV/0!	#DIV/0!	#DIV/0!	#DIV/0!	#DIV/0!	#DIV/0!	#DIV/0!	#DIV/0!	0	0	0	0	0	0	#DIV/0!	#DIV/0!	#DIV/0!	#DIV/0!	#DIV/0!	#DIV/0!	#DIV/0!	0
						#DIV/0!		#DIV/0!															#DIV/0!	#DIV/0!	#DIV/0!	#DIV/0!	#DIV/0!	#DIV/0!	#DIV/0!	#DIV/0!	#DIV/0!	#DIV/0!	#DIV/0!	#DIV/0!	#DIV/0!	0	0	0	0	0	0	#DIV/0!	#DIV/0!	#DIV/0!	#DIV/0!	#DIV/0!	#DIV/0!	#DIV/0!	0
						#DIV/0!		#DIV/0!															#DIV/0!	#DIV/0!	#DIV/0!	#DIV/0!	#DIV/0!	#DIV/0!	#DIV/0!	#DIV/0!	#DIV/0!	#DIV/0!	#DIV/0!	#DIV/0!	#DIV/0!	0	0	0	0	0	0	#DIV/0!	#DIV/0!	#DIV/0!	#DIV/0!	#DIV/0!	#DIV/0!	#DIV/0!	0
						#DIV/0!		#DIV/0!															#DIV/0!	#DIV/0!	#DIV/0!	#DIV/0!	#DIV/0!	#DIV/0!	#DIV/0!	#DIV/0!	#DIV/0!	#DIV/0!	#DIV/0!	#DIV/0!	#DIV/0!	0	0	0	0	0	0	#DIV/0!	#DIV/0!	#DIV/0!	#DIV/0!	#DIV/0!	#DIV/0!	#DIV/0!	0
						#DIV/0!		#DIV/0!															#DIV/0!	#DIV/0!	#DIV/0!	#DIV/0!	#DIV/0!	#DIV/0!	#DIV/0!	#DIV/0!	#DIV/0!	#DIV/0!	#DIV/0!	#DIV/0!	#DIV/0!	0	0	0	0	0	0	#DIV/0!	#DIV/0!	#DIV/0!	#DIV/0!	#DIV/0!	#DIV/0!	#DIV/0!	0
						#DIV/0!		#DIV/0!															#DIV/0!	#DIV/0!	#DIV/0!	#DIV/0!	#DIV/0!	#DIV/0!	#DIV/0!	#DIV/0!	#DIV/0!	#DIV/0!	#DIV/0!	#DIV/0!	#DIV/0!	0	0	0	0	0	0	#DIV/0!	#DIV/0!	#DIV/0!	#DIV/0!	#DIV/0!	#DIV/0!	#DIV/0!	0
						#DIV/0!		#DIV/0!															#DIV/0!	#DIV/0!	#DIV/0!	#DIV/0!	#DIV/0!	#DIV/0!	#DIV/0!	#DIV/0!	#DIV/0!	#DIV/0!	#DIV/0!	#DIV/0!	#DIV/0!	0	0	0	0	0	0	#DIV/0!	#DIV/0!	#DIV/0!	#DIV/0!	#DIV/0!	#DIV/0!	#DIV/0!	0
						#DIV/0!		#DIV/0!															#DIV/0!	#DIV/0!	#DIV/0!	#DIV/0!	#DIV/0!	#DIV/0!	#DIV/0!	#DIV/0!	#DIV/0!	#DIV/0!	#DIV/0!	#DIV/0!	#DIV/0!	0	0	0	0	0	0	#DIV/0!	#DIV/0!	#DIV/0!	#DIV/0!	#DIV/0!	#DIV/0!	#DIV/0!	0
						#DIV/0!		#DIV/0!															#DIV/0!	#DIV/0!	#DIV/0!	#DIV/0!	#DIV/0!	#DIV/0!	#DIV/0!	#DIV/0!	#DIV/0!	#DIV/0!	#DIV/0!	#DIV/0!	#DIV/0!	0	0	0	0	0	0	#DIV/0!	#DIV/0!	#DIV/0!	#DIV/0!	#DIV/0!	#DIV/0!	#DIV/0!	0
						#DIV/0!		#DIV/0!															#DIV/0!	#DIV/0!	#DIV/0!	#DIV/0!	#DIV/0!	#DIV/0!	#DIV/0!	#DIV/0!	#DIV/0!	#DIV/0!	#DIV/0!	#DIV/0!	#DIV/0!	0	0	0	0	0	0	#DIV/0!	#DIV/0!	#DIV/0!	#DIV/0!	#DIV/0!	#DIV/0!	#DIV/0!	0
						#DIV/0!		#DIV/0!															#DIV/0!	#DIV/0!	#DIV/0!	#DIV/0!	#DIV/0!	#DIV/0!	#DIV/0!	#DIV/0!	#DIV/0!	#DIV/0!	#DIV/0!	#DIV/0!	#DIV/0!	0	0	0	0	0	0	#DIV/0!	#DIV/0!	#DIV/0!	#DIV/0!	#DIV/0!	#DIV/0!	#DIV/0!	0
						#DIV/0!		#DIV/0!															#DIV/0!	#DIV/0!	#DIV/0!	#DIV/0!	#DIV/0!	#DIV/0!	#DIV/0!	#DIV/0!	#DIV/0!	#DIV/0!	#DIV/0!	#DIV/0!	#DIV/0!	0	0	0	0	0	0	#DIV/0!	#DIV/0!	#DIV/0!	#DIV/0!	#DIV/0!	#DIV/0!	#DIV/0!	0
						#DIV/0!		#DIV/0!															#DIV/0!	#DIV/0!	#DIV/0!	#DIV/0!	#DIV/0!	#DIV/0!	#DIV/0!	#DIV/0!	#DIV/0!	#DIV/0!	#DIV/0!	#DIV/0!	#DIV/0!	0	0	0	0	0	0	#DIV/0!	#DIV/0!	#DIV/0!	#DIV/0!	#DIV/0!	#DIV/0!	#DIV/0!	0
						#DIV/0!		#DIV/0!															#DIV/0!	#DIV/0!	#DIV/0!	#DIV/0!	#DIV/0!	#DIV/0!	#DIV/0!	#DIV/0!	#DIV/0!	#DIV/0!	#DIV/0!	#DIV/0!	#DIV/0!	0	0	0	0	0	0	#DIV/0!	#DIV/0!	#DIV/0!	#DIV/0!	#DIV/0!	#DIV/0!	#DIV/0!	0
						#DIV/0!		#DIV/0!															#DIV/0!	#DIV/0!	#DIV/0!	#DIV/0!	#DIV/0!	#DIV/0!	#DIV/0!	#DIV/0!	#DIV/0!	#DIV/0!	#DIV/0!	#DIV/0!	#DIV/0!	0	0	0	0	0	0	#DIV/0!	#DIV/0!	#DIV/0!	#DIV/0!	#DIV/0!	#DIV/0!	#DIV/0!	0
						#DIV/0!		#DIV/0!															#DIV/0!	#DIV/0!	#DIV/0!	#DIV/0!	#DIV/0!	#DIV/0!	#DIV/0!	#DIV/0!	#DIV/0!	#DIV/0!	#DIV/0!	#DIV/0!	#DIV/0!	0	0	0	0	0	0	#DIV/0!	#DIV/0!	#DIV/0!	#DIV/0!	#DIV/0!	#DIV/0!	#DIV/0!	0
						#DIV/0!		#DIV/0!															#DIV/0!	#DIV/0!	#DIV/0!	#DIV/0!	#DIV/0!	#DIV/0!	#DIV/0!	#DIV/0!	#DIV/0!	#DIV/0!	#DIV/0!	#DIV/0!	#DIV/0!	0	0	0	0	0	0	#DIV/0!	#DIV/0!	#DIV/0!	#DIV/0!	#DIV/0!	#DIV/0!	#DIV/0!	0
						#DIV/0!		#DIV/0!															#DIV/0!	#DIV/0!	#DIV/0!	#DIV/0!	#DIV/0!	#DIV/0!	#DIV/0!	#DIV/0!	#DIV/0!	#DIV/0!	#DIV/0!	#DIV/0!	#DIV/0!	0	0	0	0	0	0	#DIV/0!	#DIV/0!	#DIV/0!	#DIV/0!	#DIV/0!	#DIV/0!	#DIV/0!	0
						#DIV/0!		#DIV/0!															#DIV/0!	#DIV/0!	#DIV/0!	#DIV/0!	#DIV/0!	#DIV/0!	#DIV/0!	#DIV/0!	#DIV/0!	#DIV/0!	#DIV/0!	#DIV/0!	#DIV/0!	0	0	0	0	0	0	#DIV/0!	#DIV/0!	#DIV/0!	#DIV/0!	#DIV/0!	#DIV/0!	#DIV/0!	0
						#DIV/0!		#DIV/0!															#DIV/0!	#DIV/0!	#DIV/0!	#DIV/0!	#DIV/0!	#DIV/0!	#DIV/0!	#DIV/0!	#DIV/0!	#DIV/0!	#DIV/0!	#DIV/0!	#DIV/0!	0	0	0	0	0	0	#DIV/0!	#DIV/0!	#DIV/0!	#DIV/0!	#DIV/0!	#DIV/0!	#DIV/0!	0
						#DIV/0!		#DIV/0!															#DIV/0!	#DIV/0!	#DIV/0!	#DIV/0!	#DIV/0!	#DIV/0!	#DIV/0!	#DIV/0!	#DIV/0!	#DIV/0!	#DIV/0!	#DIV/0!	#DIV/0!	0	0	0	0	0	0	#DIV/0!	#DIV/0!	#DIV/0!	#DIV/0!	#DIV/0!	#DIV/0!	#DIV/0!	0
						#DIV/0!		#DIV/0!															#DIV/0!	#DIV/0!	#DIV/0!	#DIV/0!	#DIV/0!	#DIV/0!	#DIV/0!	#DIV/0!	#DIV/0!	#DIV/0!	#DIV/0!	#DIV/0!	#DIV/0!	0	0	0	0	0	0	#DIV/0!	#DIV/0!	#DIV/0!	#DIV/0!	#DIV/0!	#DIV/0!	#DIV/0!	0
						#DIV/0!		#DIV/0!															#DIV/0!	#DIV/0!	#DIV/0!	#DIV/0!	#DIV/0!	#DIV/0!	#DIV/0!	#DIV/0!	#DIV/0!	#DIV/0!	#DIV/0!	#DIV/0!	#DIV/0!	0	0	0	0	0	0	#DIV/0!	#DIV/0!	#DIV/0!	#DIV/0!	#DIV/0!	#DIV/0!	#DIV/0!	0
						#DIV/0!		#DIV/0!															#DIV/0!	#DIV/0!	#DIV/0!	#DIV/0!	#DIV/0!	#DIV/0!	#DIV/0!	#DIV/0!	#DIV/0!	#DIV/0!	#DIV/0!	#DIV/0!	#DIV/0!	0	0	0	0	0	0	#DIV/0!	#DIV/0!	#DIV/0!	#DIV/0!	#DIV/0!	#DIV/0!	#DIV/0!	0
						#DIV/0!		#DIV/0!															#DIV/0!	#DIV/0!	#DIV/0!	#DIV/0!	#DIV/0!	#DIV/0!	#DIV/0!	#DIV/0!	#DIV/0!	#DIV/0!	#DIV/0!	#DIV/0!	#DIV/0!	0	0	0	0	0	0	#DIV/0!	#DIV/0!	#DIV/0!	#DIV/0!	#DIV/0!	#DIV/0!	#DIV/0!	0
						#DIV/0!		#DIV/0!															#DIV/0!	#DIV/0!	#DIV/0!	#DIV/0!	#DIV/0!	#DIV/0!	#DIV/0!	#DIV/0!	#DIV/0!	#DIV/0!	#DIV/0!	#DIV/0!	#DIV/0!	0	0	0	0	0	0	#DIV/0!	#DIV/0!	#DIV/0!	#DIV/0!	#DIV/0!	#DIV/0!	#DIV/0!	0
						#DIV/0!		#DIV/0!															#DIV/0!	#DIV/0!	#DIV/0!	#DIV/0!	#DIV/0!	#DIV/0!	#DIV/0!	#DIV/0!	#DIV/0!	#DIV/0!	#DIV/0!	#DIV/0!	#DIV/0!	0	0	0	0	0	0	#DIV/0!	#DIV/0!	#DIV/0!	#DIV/0!	#DIV/0!	#DIV/0!	#DIV/0!	0
						#DIV/0!		#DIV/0!															#DIV/0!	#DIV/0!	#DIV/0!	#DIV/0!	#DIV/0!	#DIV/0!	#DIV/0!	#DIV/0!	#DIV/0!	#DIV/0!	#DIV/0!	#DIV/0!	#DIV/0!	0	0	0	0	0	0	#DIV/0!	#DIV/0!	#DIV/0!	#DIV/0!	#DIV/0!	#DIV/0!	#DIV/0!	0
						#DIV/0!		#DIV/0!															#DIV/0!	#DIV/0!	#DIV/0!	#DIV/0!	#DIV/0!	#DIV/0!	#DIV/0!	#DIV/0!	#DIV/0!	#DIV/0!	#DIV/0!	#DIV/0!	#DIV/0!	0	0	0	0	0	0	#DIV/0!	#DIV/0!	#DIV/0!	#DIV/0!	#DIV/0!	#DIV/0!	#DIV/0!	0
						#DIV/0!		#DIV/0!															#DIV/0!	#DIV/0!	#DIV/0!	#DIV/0!	#DIV/0!	#DIV/0!	#DIV/0!	#DIV/0!	#DIV/0!	#DIV/0!	#DIV/0!	#DIV/0!	#DIV/0!	0	0	0	0	0	0	#DIV/0!	#DIV/0!	#DIV/0!	#DIV/0!	#DIV/0!	#DIV/0!	#DIV/0!	0
						#DIV/0!		#DIV/0!															#DIV/0!	#DIV/0!	#DIV/0!	#DIV/0!	#DIV/0!	#DIV/0!	#DIV/0!	#DIV/0!	#DIV/0!	#DIV/0!	#DIV/0!	#DIV/0!	#DIV/0!	0	0	0	0	0	0	#DIV/0!	#DIV/0!	#DIV/0!	#DIV/0!	#DIV/0!	#DIV/0!	#DIV/0!	0
						#DIV/0!		#DIV/0!															#DIV/0!	#DIV/0!	#DIV/0!	#DIV/0!	#DIV/0!	#DIV/0!	#DIV/0!	#DIV/0!	#DIV/0!	#DIV/0!	#DIV/0!	#DIV/0!	#DIV/0!	0	0	0	0	0	0	#DIV/0!	#DIV/0!	#DIV/0!	#DIV/0!	#DIV/0!	#DIV/0!	#DIV/0!	0
						#DIV/0!		#DIV/0!															#DIV/0!	#DIV/0!	#DIV/0!	#DIV/0!	#DIV/0!	#DIV/0!	#DIV/0!	#DIV/0!	#DIV/0!	#DIV/0!	#DIV/0!	#DIV/0!	#DIV/0!	0	0	0	0	0	0	#DIV/0!	#DIV/0!	#DIV/0!	#DIV/0!	#DIV/0!	#DIV/0!	#DIV/0!	0
						#DIV/0!		#DIV/0!															#DIV/0!	#DIV/0!	#DIV/0!	#DIV/0!	#DIV/0!	#DIV/0!	#DIV/0!	#DIV/0!	#DIV/0!	#DIV/0!	#DIV/0!	#DIV/0!	#DIV/0!	0	0	0	0	0	0	#DIV/0!	#DIV/0!	#DIV/0!	#DIV/0!	#DIV/0!	#DIV/0!	#DIV/0!	0
						#DIV/0!		#DIV/0!															#DIV/0!	#DIV/0!	#DIV/0!	#DIV/0!	#DIV/0!	#DIV/0!	#DIV/0!	#DIV/0!	#DIV/0!	#DIV/0!	#DIV/0!	#DIV/0!	#DIV/0!	0	0	0	0	0	0	#DIV/0!	#DIV/0!	#DIV/0!	#DIV/0!	#DIV/0!	#DIV/0!	#DIV/0!	0
						#DIV/0!		#DIV/0!															#DIV/0!	#DIV/0!	#DIV/0!	#DIV/0!	#DIV/0!	#DIV/0!	#DIV/0!	#DIV/0!	#DIV/0!	#DIV/0!	#DIV/0!	#DIV/0!	#DIV/0!	0	0	0	0	0	0	#DIV/0!	#DIV/0!	#DIV/0!	#DIV/0!	#DIV/0!	#DIV/0!	#DIV/0!	0
						#DIV/0!		#DIV/0!															#DIV/0!	#DIV/0!	#DIV/0!	#DIV/0!	#DIV/0!	#DIV/0!	#DIV/0!	#DIV/0!	#DIV/0!	#DIV/0!	#DIV/0!	#DIV/0!	#DIV/0!	0	0	0	0	0	0	#DIV/0!	#DIV/0!	#DIV/0!	#DIV/0!	#DIV/0!	#DIV/0!	#DIV/0!	0
						#DIV/0!		#DIV/0!															#DIV/0!	#DIV/0!	#DIV/0!	#DIV/0!	#DIV/0!	#DIV/0!	#DIV/0!	#DIV/0!	#DIV/0!	#DIV/0!	#DIV/0!	#DIV/0!	#DIV/0!	0	0	0	0	0	0	#DIV/0!	#DIV/0!	#DIV/0!	#DIV/0!	#DIV/0!	#DIV/0!	#DIV/0!	0
						#DIV/0!		#DIV/0!															#DIV/0!	#DIV/0!	#DIV/0!	#DIV/0!	#DIV/0!	#DIV/0!	#DIV/0!	#DIV/0!	#DIV/0!	#DIV/0!	#DIV/0!	#DIV/0!	#DIV/0!	0	0	0	0	0	0	#DIV/0!	#DIV/0!	#DIV/0!	#DIV/0!	#DIV/0!	#DIV/0!	#DIV/0!	0
						#DIV/0!		#DIV/0!															#DIV/0!	#DIV/0!	#DIV/0!	#DIV/0!	#DIV/0!	#DIV/0!	#DIV/0!	#DIV/0!	#DIV/0!	#DIV/0!	#DIV/0!	#DIV/0!	#DIV/0!	0	0	0	0	0	0	#DIV/0!	#DIV/0!	#DIV/0!	#DIV/0!	#DIV/0!	#DIV/0!	#DIV/0!	0
						#DIV/0!		#DIV/0!															#DIV/0!	#DIV/0!	#DIV/0!	#DIV/0!	#DIV/0!	#DIV/0!	#DIV/0!	#DIV/0!	#DIV/0!	#DIV/0!	#DIV/0!	#DIV/0!	#DIV/0!	0	0	0	0	0	0	#DIV/0!	#DIV/0!	#DIV/0!	#DIV/0!	#DIV/0!	#DIV/0!	#DIV/0!	0
						#DIV/0!		#DIV/0!															#DIV/0!	#DIV/0!	#DIV/0!	#DIV/0!	#DIV/0!	#DIV/0!	#DIV/0!	#DIV/0!	#DIV/0!	#DIV/0!	#DIV/0!	#DIV/0!	#DIV/0!	0	0	0	0	0	0	#DIV/0!	#DIV/0!	#DIV/0!	#DIV/0!	#DIV/0!	#DIV/0!	#DIV/0!	0
						#DIV/0!		#DIV/0!															#DIV/0!	#DIV/0!	#DIV/0!	#DIV/0!	#DIV/0!	#DIV/0!	#DIV/0!	#DIV/0!	#DIV/0!	#DIV/0!	#DIV/0!	#DIV/0!	#DIV/0!	0	0	0	0	0	0	#DIV/0!	#DIV/0!	#DIV/0!	#DIV/0!	#DIV/0!	#DIV/0!	#DIV/0!	0
						#DIV/0!		#DIV/0!															#DIV/0!	#DIV/0!	#DIV/0!	#DIV/0!	#DIV/0!	#DIV/0!	#DIV/0!	#DIV/0!	#DIV/0!	#DIV/0!	#DIV/0!	#DIV/0!	#DIV/0!	0	0	0	0	0	0	#DIV/0!	#DIV/0!	#DIV/0!	#DIV/0!	#DIV/0!	#DIV/0!	#DIV/0!	0
						#DIV/0!		#DIV/0!															#DIV/0!	#DIV/0!	#DIV/0!	#DIV/0!	#DIV/0!	#DIV/0!	#DIV/0!	#DIV/0!	#DIV/0!	#DIV/0!	#DIV/0!	#DIV/0!	#DIV/0!	0	0	0	0	0	0	#DIV/0!	#DIV/0!	#DIV/0!	#DIV/0!	#DIV/0!	#DIV/0!	#DIV/0!	0
						#DIV/0!		#DIV/0!															#DIV/0!	#DIV/0!	#DIV/0!	#DIV/0!	#DIV/0!	#DIV/0!	#DIV/0!	#DIV/0!	#DIV/0!	#DIV/0!	#DIV/0!	#DIV/0!	#DIV/0!	0	0	0	0	0	0	#DIV/0!	#DIV/0!	#DIV/0!	#DIV/0!	#DIV/0!	#DIV/0!	#DIV/0!	0
						#DIV/0!		#DIV/0!															#DIV/0!	#DIV/0!	#DIV/0!	#DIV/0!	#DIV/0!	#DIV/0!	#DIV/0!	#DIV/0!	#DIV/0!	#DIV/0!	#DIV/0!	#DIV/0!	#DIV/0!	0	0	0	0	0	0	#DIV/0!	#DIV/0!	#DIV/0!	#DIV/0!	#DIV/0!	#DIV/0!	#DIV/0!	0
						#DIV/0!		#DIV/0!															#DIV/0!	#DIV/0!	#DIV/0!	#DIV/0!	#DIV/0!	#DIV/0!	#DIV/0!	#DIV/0!	#DIV/0!	#DIV/0!	#DIV/0!	#DIV/0!	#DIV/0!	0	0	0	0	0	0	#DIV/0!	#DIV/0!	#DIV/0!	#DIV/0!	#DIV/0!	#DIV/0!	#DIV/0!	0
						#DIV/0!		#DIV/0!															#DIV/0!	#DIV/0!	#DIV/0!	#DIV/0!	#DIV/0!	#DIV/0!	#DIV/0!	#DIV/0!	#DIV/0!	#DIV/0!	#DIV/0!	#DIV/0!	#DIV/0!	0	0	0	0	0	0	#DIV/0!	#DIV/0!	#DIV/0!	#DIV/0!	#DIV/0!	#DIV/0!	#DIV/0!	0
						#DIV/0!		#DIV/0!															#DIV/0!	#DIV/0!	#DIV/0!	#DIV/0!	#DIV/0!	#DIV/0!	#DIV/0!	#DIV/0!	#DIV/0!	#DIV/0!	#DIV/0!	#DIV/0!	#DIV/0!	0	0	0	0	0	0	#DIV/0!	#DIV/0!	#DIV/0!	#DIV/0!	#DIV/0!	#DIV/0!	#DIV/0!	0
						#DIV/0!		#DIV/0!															#DIV/0!	#DIV/0!	#DIV/0!	#DIV/0!	#DIV/0!	#DIV/0!	#DIV/0!	#DIV/0!	#DIV/0!	#DIV/0!	#DIV/0!	#DIV/0!	#DIV/0!	0	0	0	0	0	0	#DIV/0!	#DIV/0!	#DIV/0!	#DIV/0!	#DIV/0!	#DIV/0!	#DIV/0!	0
						#DIV/0!		#DIV/0!															#DIV/0!	#DIV/0!	#DIV/0!	#DIV/0!	#DIV/0!	#DIV/0!	#DIV/0!	#DIV/0!	#DIV/0!	#DIV/0!	#DIV/0!	#DIV/0!	#DIV/0!	0	0	0	0	0	0	#DIV/0!	#DIV/0!	#DIV/0!	#DIV/0!	#DIV/0!	#DIV/0!	#DIV/0!	0
						#DIV/0!		#DIV/0!															#DIV/0!	#DIV/0!	#DIV/0!	#DIV/0!	#DIV/0!	#DIV/0!	#DIV/0!	#DIV/0!	#DIV/0!	#DIV/0!	#DIV/0!	#DIV/0!	#DIV/0!	0	0	0	0	0	0	#DIV/0!	#DIV/0!	#DIV/0!	#DIV/0!	#DIV/0!	#DIV/0!	#DIV/0!	0
						#DIV/0!		#DIV/0!															#DIV/0!	#DIV/0!	#DIV/0!	#DIV/0!	#DIV/0!	#DIV/0!	#DIV/0!	#DIV/0!	#DIV/0!	#DIV/0!	#DIV/0!	#DIV/0!	#DIV/0!	0	0	0	0	0	0	#DIV/0!	#DIV/0!	#DIV/0!	#DIV/0!	#DIV/0!	#DIV/0!	#DIV/0!	0
						#DIV/0!		#DIV/0!															#DIV/0!	#DIV/0!	#DIV/0!	#DIV/0!	#DIV/0!	#DIV/0!	#DIV/0!	#DIV/0!	#DIV/0!	#DIV/0!	#DIV/0!	#DIV/0!	#DIV/0!	0	0	0	0	0	0	#DIV/0!	#DIV/0!	#DIV/0!	#DIV/0!	#DIV/0!	#DIV/0!	#DIV/0!	0
						#DIV/0!		#DIV/0!															#DIV/0!	#DIV/0!	#DIV/0!	#DIV/0!	#DIV/0!	#DIV/0!	#DIV/0!	#DIV/0!	#DIV/0!	#DIV/0!	#DIV/0!	#DIV/0!	#DIV/0!	0	0	0	0	0	0	#DIV/0!	#DIV/0!	#DIV/0!	#DIV/0!	#DIV/0!	#DIV/0!	#DIV/0!	0
						#DIV/0!		#DIV/0!															#DIV/0!	#DIV/0!	#DIV/0!	#DIV/0!	#DIV/0!	#DIV/0!	#DIV/0!	#DIV/0!	#DIV/0!	#DIV/0!	#DIV/0!	#DIV/0!	#DIV/0!	0	0	0	0	0	0	#DIV/0!	#DIV/0!	#DIV/0!	#DIV/0!	#DIV/0!	#DIV/0!	#DIV/0!	0
						#DIV/0!		#DIV/0!															#DIV/0!	#DIV/0!	#DIV/0!	#DIV/0!	#DIV/0!	#DIV/0!	#DIV/0!	#DIV/0!	#DIV/0!	#DIV/0!	#DIV/0!	#DIV/0!	#DIV/0!	0	0	0	0	0	0	#DIV/0!	#DIV/0!	#DIV/0!	#DIV/0!	#DIV/0!	#DIV/0!	#DIV/0!	0
						#DIV/0!		#DIV/0!															#DIV/0!	#DIV/0!	#DIV/0!	#DIV/0!	#DIV/0!	#DIV/0!	#DIV/0!	#DIV/0!	#DIV/0!	#DIV/0!	#DIV/0!	#DIV/0!	#DIV/0!	0	0	0	0	0	0	#DIV/0!	#DIV/0!	#DIV/0!	#DIV/0!	#DIV/0!	#DIV/0!	#DIV/0!	0
						#DIV/0!		#DIV/0!															#DIV/0!	#DIV/0!	#DIV/0!	#DIV/0!	#DIV/0!	#DIV/0!	#DIV/0!	#DIV/0!	#DIV/0!	#DIV/0!	#DIV/0!	#DIV/0!	#DIV/0!	0	0	0	0	0	0	#DIV/0!	#DIV/0!	#DIV/0!	#DIV/0!	#DIV/0!	#DIV/0!	#DIV/0!	0
						#DIV/0!		#DIV/0!															#DIV/0!	#DIV/0!	#DIV/0!	#DIV/0!	#DIV/0!	#DIV/0!	#DIV/0!	#DIV/0!	#DIV/0!	#DIV/0!	#DIV/0!	#DIV/0!	#DIV/0!	0	0	0	0	0	0	#DIV/0!	#DIV/0!	#DIV/0!	#DIV/0!	#DIV/0!	#DIV/0!	#DIV/0!	0
						#DIV/0!		#DIV/0!															#DIV/0!	#DIV/0!	#DIV/0!	#DIV/0!	#DIV/0!	#DIV/0!	#DIV/0!	#DIV/0!	#DIV/0!	#DIV/0!	#DIV/0!	#DIV/0!	#DIV/0!	0	0	0	0	0	0	#DIV/0!	#DIV/0!	#DIV/0!	#DIV/0!	#DIV/0!	#DIV/0!	#DIV/0!	0
						#DIV/0!		#DIV/0!															#DIV/0!	#DIV/0!	#DIV/0!	#DIV/0!	#DIV/0!	#DIV/0!	#DIV/0!	#DIV/0!	#DIV/0!	#DIV/0!	#DIV/0!	#DIV/0!	#DIV/0!	0	0	0	0	0	0	#DIV/0!	#DIV/0!	#DIV/0!	#DIV/0!	#DIV/0!	#DIV/0!	#DIV/0!	0
						#DIV/0!		#DIV/0!															#DIV/0!	#DIV/0!	#DIV/0!	#DIV/0!	#DIV/0!	#DIV/0!	#DIV/0!	#DIV/0!	#DIV/0!	#DIV/0!	#DIV/0!	#DIV/0!	#DIV/0!	0	0	0	0	0	0	#DIV/0!	#DIV/0!	#DIV/0!	#DIV/0!	#DIV/0!	#DIV/0!	#DIV/0!	0
						#DIV/0!		#DIV/0!															#DIV/0!	#DIV/0!	#DIV/0!	#DIV/0!	#DIV/0!	#DIV/0!	#DIV/0!	#DIV/0!	#DIV/0!	#DIV/0!	#DIV/0!	#DIV/0!	#DIV/0!	0	0	0	0	0	0	#DIV/0!	#DIV/0!	#DIV/0!	#DIV/0!	#DIV/0!	#DIV/0!	#DIV/0!	0
						#DIV/0!		#DIV/0!															#DIV/0!	#DIV/0!	#DIV/0!	#DIV/0!	#DIV/0!	#DIV/0!	#DIV/0!	#DIV/0!	#DIV/0!	#DIV/0!	#DIV/0!	#DIV/0!	#DIV/0!	0	0	0	0	0	0	#DIV/0!	#DIV/0!	#DIV/0!	#DIV/0!	#DIV/0!	#DIV/0!	#DIV/0!	0
						#DIV/0!		#DIV/0!															#DIV/0!	#DIV/0!	#DIV/0!	#DIV/0!	#DIV/0!	#DIV/0!	#DIV/0!	#DIV/0!	#DIV/0!	#DIV/0!	#DIV/0!	#DIV/0!	#DIV/0!	0	0	0	0	0	0	#DIV/0!	#DIV/0!	#DIV/0!	#DIV/0!	#DIV/0!	#DIV/0!	#DIV/0!	0
						#DIV/0!		#DIV/0!															#DIV/0!	#DIV/0!	#DIV/0!	#DIV/0!	#DIV/0!	#DIV/0!	#DIV/0!	#DIV/0!	#DIV/0!	#DIV/0!	#DIV/0!	#DIV/0!	#DIV/0!	0	0	0	0	0	0	#DIV/0!	#DIV/0!	#DIV/0!	#DIV/0!	#DIV/0!	#DIV/0!	#DIV/0!	0
						#DIV/0!		#DIV/0!															#DIV/0!	#DIV/0!	#DIV/0!	#DIV/0!	#DIV/0!	#DIV/0!	#DIV/0!	#DIV/0!	#DIV/0!	#DIV/0!	#DIV/0!	#DIV/0!	#DIV/0!	0	0	0	0	0	0	#DIV/0!	#DIV/0!	#DIV/0!	#DIV/0!	#DIV/0!	#DIV/0!	#DIV/0!	0
						#DIV/0!		#DIV/0!															#DIV/0!	#DIV/0!	#DIV/0!	#DIV/0!	#DIV/0!	#DIV/0!	#DIV/0!	#DIV/0!	#DIV/0!	#DIV/0!	#DIV/0!	#DIV/0!	#DIV/0!	0	0	0	0	0	0	#DIV/0!	#DIV/0!	#DIV/0!	#DIV/0!	#DIV/0!	#DIV/0!	#DIV/0!	0
						#DIV/0!		#DIV/0!															#DIV/0!	#DIV/0!	#DIV/0!	#DIV/0!	#DIV/0!	#DIV/0!	#DIV/0!	#DIV/0!	#DIV/0!	#DIV/0!	#DIV/0!	#DIV/0!	#DIV/0!	0	0	0	0	0	0	#DIV/0!	#DIV/0!	#DIV/0!	#DIV/0!	#DIV/0!	#DIV/0!	#DIV/0!	0
						#DIV/0!		#DIV/0!															#DIV/0!	#DIV/0!	#DIV/0!	#DIV/0!	#DIV/0!	#DIV/0!	#DIV/0!	#DIV/0!	#DIV/0!	#DIV/0!	#DIV/0!	#DIV/0!	#DIV/0!	0	0	0	0	0	0	#DIV/0!	#DIV/0!	#DIV/0!	#DIV/0!	#DIV/0!	#DIV/0!	#DIV/0!	0
						#DIV/0!		#DIV/0!															#DIV/0!	#DIV/0!	#DIV/0!	#DIV/0!	#DIV/0!	#DIV/0!	#DIV/0!	#DIV/0!	#DIV/0!	#DIV/0!	#DIV/0!	#DIV/0!	#DIV/0!	0	0	0	0	0	0	#DIV/0!	#DIV/0!	#DIV/0!	#DIV/0!	#DIV/0!	#DIV/0!	#DIV/0!	0
						#DIV/0!		#DIV/0!															#DIV/0!	#DIV/0!	#DIV/0!	#DIV/0!	#DIV/0!	#DIV/0!	#DIV/0!	#DIV/0!	#DIV/0!	#DIV/0!	#DIV/0!	#DIV/0!	#DIV/0!	0	0	0	0	0	0	#DIV/0!	#DIV/0!	#DIV/0!	#DIV/0!	#DIV/0!	#DIV/0!	#DIV/0!	0
						#DIV/0!		#DIV/0!															#DIV/0!	#DIV/0!	#DIV/0!	#DIV/0!	#DIV/0!	#DIV/0!	#DIV/0!	#DIV/0!	#DIV/0!	#DIV/0!	#DIV/0!	#DIV/0!	#DIV/0!	0	0	0	0	0	0	#DIV/0!	#DIV/0!	#DIV/0!	#DIV/0!	#DIV/0!	#DIV/0!	#DIV/0!	0
						#DIV/0!		#DIV/0!															#DIV/0!	#DIV/0!	#DIV/0!	#DIV/0!	#DIV/0!	#DIV/0!	#DIV/0!	#DIV/0!	#DIV/0!	#DIV/0!	#DIV/0!	#DIV/0!	#DIV/0!	0	0	0	0	0	0	#DIV/0!	#DIV/0!	#DIV/0!	#DIV/0!	#DIV/0!	#DIV/0!	#DIV/0!	0
						#DIV/0!		#DIV/0!															#DIV/0!	#DIV/0!	#DIV/0!	#DIV/0!	#DIV/0!	#DIV/0!	#DIV/0!	#DIV/0!	#DIV/0!	#DIV/0!	#DIV/0!	#DIV/0!	#DIV/0!	0	0	0	0	0	0	#DIV/0!	#DIV/0!	#DIV/0!	#DIV/0!	#DIV/0!	#DIV/0!	#DIV/0!	0
						#DIV/0!		#DIV/0!															#DIV/0!	#DIV/0!	#DIV/0!	#DIV/0!	#DIV/0!	#DIV/0!	#DIV/0!	#DIV/0!	#DIV/0!	#DIV/0!	#DIV/0!	#DIV/0!	#DIV/0!	0	0	0	0	0	0	#DIV/0!	#DIV/0!	#DIV/0!	#DIV/0!	#DIV/0!	#DIV/0!	#DIV/0!	0
						#DIV/0!		#DIV/0!															#DIV/0!	#DIV/0!	#DIV/0!	#DIV/0!	#DIV/0!	#DIV/0!	#DIV/0!	#DIV/0!	#DIV/0!	#DIV/0!	#DIV/0!	#DIV/0!	#DIV/0!	0	0	0	0	0	0	#DIV/0!	#DIV/0!	#DIV/0!	#DIV/0!	#DIV/0!	#DIV/0!	#DIV/0!	0
						#DIV/0!		#DIV/0!															#DIV/0!	#DIV/0!	#DIV/0!	#DIV/0!	#DIV/0!	#DIV/0!	#DIV/0!	#DIV/0!	#DIV/0!	#DIV/0!	#DIV/0!	#DIV/0!	#DIV/0!	0	0	0	0	0	0	#DIV/0!	#DIV/0!	#DIV/0!	#DIV/0!	#DIV/0!	#DIV/0!	#DIV/0!	0
						#DIV/0!		#DIV/0!															#DIV/0!	#DIV/0!	#DIV/0!	#DIV/0!	#DIV/0!	#DIV/0!	#DIV/0!	#DIV/0!	#DIV/0!	#DIV/0!	#DIV/0!	#DIV/0!	#DIV/0!	0	0	0	0	0	0	#DIV/0!	#DIV/0!	#DIV/0!	#DIV/0!	#DIV/0!	#DIV/0!	#DIV/0!	0
						#DIV/0!		#DIV/0!															#DIV/0!	#DIV/0!	#DIV/0!	#DIV/0!	#DIV/0!	#DIV/0!	#DIV/0!	#DIV/0!	#DIV/0!	#DIV/0!	#DIV/0!	#DIV/0!	#DIV/0!	0	0	0	0	0	0	#DIV/0!	#DIV/0!	#DIV/0!	#DIV/0!	#DIV/0!	#DIV/0!	#DIV/0!	0
						#DIV/0!		#DIV/0!															#DIV/0!	#DIV/0!	#DIV/0!	#DIV/0!	#DIV/0!	#DIV/0!	#DIV/0!	#DIV/0!	#DIV/0!	#DIV/0!	#DIV/0!	#DIV/0!	#DIV/0!	0	0	0	0	0	0	#DIV/0!	#DIV/0!	#DIV/0!	#DIV/0!	#DIV/0!	#DIV/0!	#DIV/0!	0
						#DIV/0!		#DIV/0!															#DIV/0!	#DIV/0!	#DIV/0!	#DIV/0!	#DIV/0!	#DIV/0!	#DIV/0!	#DIV/0!	#DIV/0!	#DIV/0!	#DIV/0!	#DIV/0!	#DIV/0!	0	0	0	0	0	0	#DIV/0!	#DIV/0!	#DIV/0!	#DIV/0!	#DIV/0!	#DIV/0!	#DIV/0!	0
						#DIV/0!		#DIV/0!															#DIV/0!	#DIV/0!	#DIV/0!	#DIV/0!	#DIV/0!	#DIV/0!	#DIV/0!	#DIV/0!	#DIV/0!	#DIV/0!	#DIV/0!	#DIV/0!	#DIV/0!	0	0	0	0	0	0	#DIV/0!	#DIV/0!	#DIV/0!	#DIV/0!	#DIV/0!	#DIV/0!	#DIV/0!	0
						#DIV/0!		#DIV/0!															#DIV/0!	#DIV/0!	#DIV/0!	#DIV/0!	#DIV/0!	#DIV/0!	#DIV/0!	#DIV/0!	#DIV/0!	#DIV/0!	#DIV/0!	#DIV/0!	#DIV/0!	0	0	0	0	0	0	#DIV/0!	#DIV/0!	#DIV/0!	#DIV/0!	#DIV/0!	#DIV/0!	#DIV/0!	0
						#DIV/0!		#DIV/0!															#DIV/0!	#DIV/0!	#DIV/0!	#DIV/0!	#DIV/0!	#DIV/0!	#DIV/0!	#DIV/0!	#DIV/0!	#DIV/0!	#DIV/0!	#DIV/0!	#DIV/0!	0	0	0	0	0	0	#DIV/0!	#DIV/0!	#DIV/0!	#DIV/0!	#DIV/0!	#DIV/0!	#DIV/0!	0
						#DIV/0!		#DIV/0!															#DIV/0!	#DIV/0!	#DIV/0!	#DIV/0!	#DIV/0!	#DIV/0!	#DIV/0!	#DIV/0!	#DIV/0!	#DIV/0!	#DIV/0!	#DIV/0!	#DIV/0!	0	0	0	0	0	0	#DIV/0!	#DIV/0!	#DIV/0!	#DIV/0!	#DIV/0!	#DIV/0!	#DIV/0!	0
						#DIV/0!		#DIV/0!															#DIV/0!	#DIV/0!	#DIV/0!	#DIV/0!	#DIV/0!	#DIV/0!	#DIV/0!	#DIV/0!	#DIV/0!	#DIV/0!	#DIV/0!	#DIV/0!	#DIV/0!	0	0	0	0	0	0	#DIV/0!	#DIV/0!	#DIV/0!	#DIV/0!	#DIV/0!	#DIV/0!	#DIV/0!	0
						#DIV/0!		#DIV/0!															#DIV/0!	#DIV/0!	#DIV/0!	#DIV/0!	#DIV/0!	#DIV/0!	#DIV/0!	#DIV/0!	#DIV/0!	#DIV/0!	#DIV/0!	#DIV/0!	#DIV/0!	0	0	0	0	0	0	#DIV/0!	#DIV/0!	#DIV/0!	#DIV/0!	#DIV/0!	#DIV/0!	#DIV/0!	0
						#DIV/0!		#DIV/0!															#DIV/0!	#DIV/0!	#DIV/0!	#DIV/0!	#DIV/0!	#DIV/0!	#DIV/0!	#DIV/0!	#DIV/0!	#DIV/0!	#DIV/0!	#DIV/0!	#DIV/0!	0	0	0	0	0	0	#DIV/0!	#DIV/0!	#DIV/0!	#DIV/0!	#DIV/0!	#DIV/0!	#DIV/0!	0
						#DIV/0!		#DIV/0!															#DIV/0!	#DIV/0!	#DIV/0!	#DIV/0!	#DIV/0!	#DIV/0!	#DIV/0!	#DIV/0!	#DIV/0!	#DIV/0!	#DIV/0!	#DIV/0!	#DIV/0!	0	0	0	0	0	0	#DIV/0!	#DIV/0!	#DIV/0!	#DIV/0!	#DIV/0!	#DIV/0!	#DIV/0!	0
						#DIV/0!		#DIV/0!															#DIV/0!	#DIV/0!	#DIV/0!	#DIV/0!	#DIV/0!	#DIV/0!	#DIV/0!	#DIV/0!	#DIV/0!	#DIV/0!	#DIV/0!	#DIV/0!	#DIV/0!	0	0	0	0	0	0	#DIV/0!	#DIV/0!	#DIV/0!	#DIV/0!	#DIV/0!	#DIV/0!	#DIV/0!	0
						#DIV/0!		#DIV/0!															#DIV/0!	#DIV/0!	#DIV/0!	#DIV/0!	#DIV/0!	#DIV/0!	#DIV/0!	#DIV/0!	#DIV/0!	#DIV/0!	#DIV/0!	#DIV/0!	#DIV/0!	0	0	0	0	0	0	#DIV/0!	#DIV/0!	#DIV/0!	#DIV/0!	#DIV/0!	#DIV/0!	#DIV/0!	0
						#DIV/0!		#DIV/0!															#DIV/0!	#DIV/0!	#DIV/0!	#DIV/0!	#DIV/0!	#DIV/0!	#DIV/0!	#DIV/0!	#DIV/0!	#DIV/0!	#DIV/0!	#DIV/0!	#DIV/0!	0	0	0	0	0	0	#DIV/0!	#DIV/0!	#DIV/0!	#DIV/0!	#DIV/0!	#DIV/0!	#DIV/0!	0
						#DIV/0!		#DIV/0!															#DIV/0!	#DIV/0!	#DIV/0!	#DIV/0!	#DIV/0!	#DIV/0!	#DIV/0!	#DIV/0!	#DIV/0!	#DIV/0!	#DIV/0!	#DIV/0!	#DIV/0!	0	0	0	0	0	0	#DIV/0!	#DIV/0!	#DIV/0!	#DIV/0!	#DIV/0!	#DIV/0!	#DIV/0!	0
						#DIV/0!		#DIV/0!															#DIV/0!	#DIV/0!	#DIV/0!	#DIV/0!	#DIV/0!	#DIV/0!	#DIV/0!	#DIV/0!	#DIV/0!	#DIV/0!	#DIV/0!	#DIV/0!	#DIV/0!	0	0	0	0	0	0	#DIV/0!	#DIV/0!	#DIV/0!	#DIV/0!	#DIV/0!	#DIV/0!	#DIV/0!	0
						#DIV/0!		#DIV/0!															#DIV/0!	#DIV/0!	#DIV/0!	#DIV/0!	#DIV/0!	#DIV/0!	#DIV/0!	#DIV/0!	#DIV/0!	#DIV/0!	#DIV/0!	#DIV/0!	#DIV/0!	0	0	0	0	0	0	#DIV/0!	#DIV/0!	#DIV/0!	#DIV/0!	#DIV/0!	#DIV/0!	#DIV/0!	0
						#DIV/0!		#DIV/0!															#DIV/0!	#DIV/0!	#DIV/0!	#DIV/0!	#DIV/0!	#DIV/0!	#DIV/0!	#DIV/0!	#DIV/0!	#DIV/0!	#DIV/0!	#DIV/0!	#DIV/0!	0	0	0	0	0	0	#DIV/0!	#DIV/0!	#DIV/0!	#DIV/0!	#DIV/0!	#DIV/0!	#DIV/0!	0
						#DIV/0!		#DIV/0!															#DIV/0!	#DIV/0!	#DIV/0!	#DIV/0!	#DIV/0!	#DIV/0!	#DIV/0!	#DIV/0!	#DIV/0!	#DIV/0!	#DIV/0!	#DIV/0!	#DIV/0!	0	0	0	0	0	0	#DIV/0!	#DIV/0!	#DIV/0!	#DIV/0!	#DIV/0!	#DIV/0!	#DIV/0!	0
						#DIV/0!		#DIV/0!															#DIV/0!	#DIV/0!	#DIV/0!	#DIV/0!	#DIV/0!	#DIV/0!	#DIV/0!	#DIV/0!	#DIV/0!	#DIV/0!	#DIV/0!	#DIV/0!	#DIV/0!	0	0	0	0	0	0	#DIV/0!	#DIV/0!	#DIV/0!	#DIV/0!	#DIV/0!	#DIV/0!	#DIV/0!	0
						#DIV/0!		#DIV/0!															#DIV/0!	#DIV/0!	#DIV/0!	#DIV/0!	#DIV/0!	#DIV/0!	#DIV/0!	#DIV/0!	#DIV/0!	#DIV/0!	#DIV/0!	#DIV/0!	#DIV/0!	0	0	0	0	0	0	#DIV/0!	#DIV/0!	#DIV/0!	#DIV/0!	#DIV/0!	#DIV/0!	#DIV/0!	0
						#DIV/0!		#DIV/0!															#DIV/0!	#DIV/0!	#DIV/0!	#DIV/0!	#DIV/0!	#DIV/0!	#DIV/0!	#DIV/0!	#DIV/0!	#DIV/0!	#DIV/0!	#DIV/0!	#DIV/0!	0	0	0	0	0	0	#DIV/0!	#DIV/0!	#DIV/0!	#DIV/0!	#DIV/0!	#DIV/0!	#DIV/0!	0
						#DIV/0!		#DIV/0!															#DIV/0!	#DIV/0!	#DIV/0!	#DIV/0!	#DIV/0!	#DIV/0!	#DIV/0!	#DIV/0!	#DIV/0!	#DIV/0!	#DIV/0!	#DIV/0!	#DIV/0!	0	0	0	0	0	0	#DIV/0!	#DIV/0!	#DIV/0!	#DIV/0!	#DIV/0!	#DIV/0!	#DIV/0!	0
						#DIV/0!		#DIV/0!															#DIV/0!	#DIV/0!	#DIV/0!	#DIV/0!	#DIV/0!	#DIV/0!	#DIV/0!	#DIV/0!	#DIV/0!	#DIV/0!	#DIV/0!	#DIV/0!	#DIV/0!	0	0	0	0	0	0	#DIV/0!	#DIV/0!	#DIV/0!	#DIV/0!	#DIV/0!	#DIV/0!	#DIV/0!	0
						#DIV/0!		#DIV/0!															#DIV/0!	#DIV/0!	#DIV/0!	#DIV/0!	#DIV/0!	#DIV/0!	#DIV/0!	#DIV/0!	#DIV/0!	#DIV/0!	#DIV/0!	#DIV/0!	#DIV/0!	0	0	0	0	0	0	#DIV/0!	#DIV/0!	#DIV/0!	#DIV/0!	#DIV/0!	#DIV/0!	#DIV/0!	0
						#DIV/0!		#DIV/0!															#DIV/0!	#DIV/0!	#DIV/0!	#DIV/0!	#DIV/0!	#DIV/0!	#DIV/0!	#DIV/0!	#DIV/0!	#DIV/0!	#DIV/0!	#DIV/0!	#DIV/0!	0	0	0	0	0	0	#DIV/0!	#DIV/0!	#DIV/0!	#DIV/0!	#DIV/0!	#DIV/0!	#DIV/0!	0
						#DIV/0!		#DIV/0!															#DIV/0!	#DIV/0!	#DIV/0!	#DIV/0!	#DIV/0!	#DIV/0!	#DIV/0!	#DIV/0!	#DIV/0!	#DIV/0!	#DIV/0!	#DIV/0!	#DIV/0!	0	0	0	0	0	0	#DIV/0!	#DIV/0!	#DIV/0!	#DIV/0!	#DIV/0!	#DIV/0!	#DIV/0!	0
						#DIV/0!		#DIV/0!															#DIV/0!	#DIV/0!	#DIV/0!	#DIV/0!	#DIV/0!	#DIV/0!	#DIV/0!	#DIV/0!	#DIV/0!	#DIV/0!	#DIV/0!	#DIV/0!	#DIV/0!	0	0	0	0	0	0	#DIV/0!	#DIV/0!	#DIV/0!	#DIV/0!	#DIV/0!	#DIV/0!	#DIV/0!	0
						#DIV/0!		#DIV/0!															#DIV/0!	#DIV/0!	#DIV/0!	#DIV/0!	#DIV/0!	#DIV/0!	#DIV/0!	#DIV/0!	#DIV/0!	#DIV/0!	#DIV/0!	#DIV/0!	#DIV/0!	0	0	0	0	0	0	#DIV/0!	#DIV/0!	#DIV/0!	#DIV/0!	#DIV/0!	#DIV/0!	#DIV/0!	0
						#DIV/0!		#DIV/0!															#DIV/0!	#DIV/0!	#DIV/0!	#DIV/0!	#DIV/0!	#DIV/0!	#DIV/0!	#DIV/0!	#DIV/0!	#DIV/0!	#DIV/0!	#DIV/0!	#DIV/0!	0	0	0	0	0	0	#DIV/0!	#DIV/0!	#DIV/0!	#DIV/0!	#DIV/0!	#DIV/0!	#DIV/0!	0
						#DIV/0!		#DIV/0!															#DIV/0!	#DIV/0!	#DIV/0!	#DIV/0!	#DIV/0!	#DIV/0!	#DIV/0!	#DIV/0!	#DIV/0!	#DIV/0!	#DIV/0!	#DIV/0!	#DIV/0!	0	0	0	0	0	0	#DIV/0!	#DIV/0!	#DIV/0!	#DIV/0!	#DIV/0!	#DIV/0!	#DIV/0!	0
						#DIV/0!		#DIV/0!															#DIV/0!	#DIV/0!	#DIV/0!	#DIV/0!	#DIV/0!	#DIV/0!	#DIV/0!	#DIV/0!	#DIV/0!	#DIV/0!	#DIV/0!	#DIV/0!	#DIV/0!	0	0	0	0	0	0	#DIV/0!	#DIV/0!	#DIV/0!	#DIV/0!	#DIV/0!	#DIV/0!	#DIV/0!	0
						#DIV/0!		#DIV/0!															#DIV/0!	#DIV/0!	#DIV/0!	#DIV/0!	#DIV/0!	#DIV/0!	#DIV/0!	#DIV/0!	#DIV/0!	#DIV/0!	#DIV/0!	#DIV/0!	#DIV/0!	0	0	0	0	0	0	#DIV/0!	#DIV/0!	#DIV/0!	#DIV/0!	#DIV/0!	#DIV/0!	#DIV/0!	0
						#DIV/0!		#DIV/0!															#DIV/0!	#DIV/0!	#DIV/0!	#DIV/0!	#DIV/0!	#DIV/0!	#DIV/0!	#DIV/0!	#DIV/0!	#DIV/0!	#DIV/0!	#DIV/0!	#DIV/0!	0	0	0	0	0	0	#DIV/0!	#DIV/0!	#DIV/0!	#DIV/0!	#DIV/0!	#DIV/0!	#DIV/0!	0
						#DIV/0!		#DIV/0!															#DIV/0!	#DIV/0!	#DIV/0!	#DIV/0!	#DIV/0!	#DIV/0!	#DIV/0!	#DIV/0!	#DIV/0!	#DIV/0!	#DIV/0!	#DIV/0!	#DIV/0!	0	0	0	0	0	0	#DIV/0!	#DIV/0!	#DIV/0!	#DIV/0!	#DIV/0!	#DIV/0!	#DIV/0!	0
						#DIV/0!		#DIV/0!															#DIV/0!	#DIV/0!	#DIV/0!	#DIV/0!	#DIV/0!	#DIV/0!	#DIV/0!	#DIV/0!	#DIV/0!	#DIV/0!	#DIV/0!	#DIV/0!	#DIV/0!	0	0	0	0	0	0	#DIV/0!	#DIV/0!	#DIV/0!	#DIV/0!	#DIV/0!	#DIV/0!	#DIV/0!	0
						#DIV/0!		#DIV/0!															#DIV/0!	#DIV/0!	#DIV/0!	#DIV/0!	#DIV/0!	#DIV/0!	#DIV/0!	#DIV/0!	#DIV/0!	#DIV/0!	#DIV/0!	#DIV/0!	#DIV/0!	0	0	0	0	0	0	#DIV/0!	#DIV/0!	#DIV/0!	#DIV/0!	#DIV/0!	#DIV/0!	#DIV/0!	0
						#DIV/0!		#DIV/0!															#DIV/0!	#DIV/0!	#DIV/0!	#DIV/0!	#DIV/0!	#DIV/0!	#DIV/0!	#DIV/0!	#DIV/0!	#DIV/0!	#DIV/0!	#DIV/0!	#DIV/0!	0	0	0	0	0	0	#DIV/0!	#DIV/0!	#DIV/0!	#DIV/0!	#DIV/0!	#DIV/0!	#DIV/0!	0
						#DIV/0!		#DIV/0!															#DIV/0!	#DIV/0!	#DIV/0!	#DIV/0!	#DIV/0!	#DIV/0!	#DIV/0!	#DIV/0!	#DIV/0!	#DIV/0!	#DIV/0!	#DIV/0!	#DIV/0!	0	0	0	0	0	0	#DIV/0!	#DIV/0!	#DIV/0!	#DIV/0!	#DIV/0!	#DIV/0!	#DIV/0!	0
						#DIV/0!		#DIV/0!															#DIV/0!	#DIV/0!	#DIV/0!	#DIV/0!	#DIV/0!	#DIV/0!	#DIV/0!	#DIV/0!	#DIV/0!	#DIV/0!	#DIV/0!	#DIV/0!	#DIV/0!	0	0	0	0	0	0	#DIV/0!	#DIV/0!	#DIV/0!	#DIV/0!	#DIV/0!	#DIV/0!	#DIV/0!	0
						#DIV/0!		#DIV/0!															#DIV/0!	#DIV/0!	#DIV/0!	#DIV/0!	#DIV/0!	#DIV/0!	#DIV/0!	#DIV/0!	#DIV/0!	#DIV/0!	#DIV/0!	#DIV/0!	#DIV/0!	0	0	0	0	0	0	#DIV/0!	#DIV/0!	#DIV/0!	#DIV/0!	#DIV/0!	#DIV/0!	#DIV/0!	0
						#DIV/0!		#DIV/0!															#DIV/0!	#DIV/0!	#DIV/0!	#DIV/0!	#DIV/0!	#DIV/0!	#DIV/0!	#DIV/0!	#DIV/0!	#DIV/0!	#DIV/0!	#DIV/0!	#DIV/0!	0	0	0	0	0	0	#DIV/0!	#DIV/0!	#DIV/0!	#DIV/0!	#DIV/0!	#DIV/0!	#DIV/0!	0
						#DIV/0!		#DIV/0!															#DIV/0!	#DIV/0!	#DIV/0!	#DIV/0!	#DIV/0!	#DIV/0!	#DIV/0!	#DIV/0!	#DIV/0!	#DIV/0!	#DIV/0!	#DIV/0!	#DIV/0!	0	0	0	0	0	0	#DIV/0!	#DIV/0!	#DIV/0!	#DIV/0!	#DIV/0!	#DIV/0!	#DIV/0!	0
						#DIV/0!		#DIV/0!
						#DIV/0!		#DIV/0!
						#DIV/0!		#DIV/0!
						#DIV/0!		#DIV/0!
						#DIV/0!		#DIV/0!
						#DIV/0!		#DIV/0!
						#DIV/0!		#DIV/0!
						#DIV/0!		#DIV/0!
						#DIV/0!		#DIV/0!
						#DIV/0!		#DIV/0!
						#DIV/0!		#DIV/0!
						#DIV/0!		#DIV/0!
						#DIV/0!		#DIV/0!
						#DIV/0!		#DIV/0!
						#DIV/0!		#DIV/0!
[truncated: 33 more columns]

## Sheet: Site6
Date:	15/8/2014
Site No. :	1v34
			Transect for	all spp except Mae par				Transect for	all species including Mae par
			Width (m)	Length (m)	Area (ha)			Width (m)	Length (m)	Area (ha)
	Transect Dimensions:		15	50	0.075			1	50	0.005
	Co-ordinates:			X	Y				X	Y
			NW Corner					NW Corner
			SW Corner					SW Corner
			NE Corner					NE Corner
			SE Corner					SE Corner
									OED		OUD	NED		NUD	NFD	OFD	OBE	OBU	NBE	NBU	RE	Notes	Canopy volume (m3)																				Damage
Trans. No.	Sp. Code	Coppice	Height (m)	D1 (m)	D2 (m)	R	Shape	Adj. shape	Score	Eaten		Score	Eaten										Total	0.5	1	2	3	4	5	0.5	1	2	3	4	5	OED	OUD	NED	NUD	NFD	OFD	Old Rec. Vol.	OED	OUD	NED	NUD	NFD	OFD	Sp. Code
1	Col mop	T	0.1	0.1	0.1	0.05	1	1															0.000785398	0.00392699	0.00785398	0.015708	0.0235619	0.0314159	0.0392699	0.000785398	0.000785398	0.000785398	0.000785398	0.000785398	0.000785398	0	0	0	0	0	0	0.000785398	0	0	0	0	0	0	Col mop
1	Col mop	T	0.07	0.08	0.08	0.04	1	1															0.000351858	0.00251327	0.00502655	0.0100531	0.0150796	0.0201062	0.0251327	0.000351858	0.000351858	0.000351858	0.000351858	0.000351858	0.000351858	0	0	0	0	0	0	0.000351858	0	0	0	0	0	0	Col mop
1	Col mop	T	0.2	0.18	0.2	0.095	1	1															0.00567057	0.0141764	0.0283529	0.0567057	0.0850586	0.113411	0.141764	0.00567057	0.00567057	0.00567057	0.00567057	0.00567057	0.00567057	0	0	0	0	0	0	0.00567057	0	0	0	0	0	0	Col mop
1	Col mop	T	0.1	0.1	0.11	0.0525	1	1															0.000865901	0.00432951	0.00865901	0.017318	0.025977	0.0346361	0.0432951	0.000865901	0.000865901	0.000865901	0.000865901	0.000865901	0.000865901	0	0	0	0	0	0	0.000865901	0	0	0	0	0	0	Col mop
1	Aca tor	T	0.7	1.7	1.45	0.7875	3	3															0.454144	0.443551	0.489893	3.36305	16.5637	48.036	105.724	0.443551	0.454144	0.454144	0.454144	0.454144	0.454144	0	0	0	0	0	0	0.454144	0	0	0	0	0	0	Aca tor
1	Col mop	T	1.4	0.86	1.14	0.5	3	3			2												0.366153	0.268877	0.357613	0.394975	0.912713	2.71145	6.59181	0.268877	0.357613	0.366153	0.366153	0.366153	0.366153	0	18	0	0	0	0	0.446528	0	8.0375	0	0	0	0	Col mop
1	Col mop	T	1.6	1.76	2.02	0.945	3	3	2														1.49478	1.00905	1.41596	1.51814	2.49617	6.53967	15.8383	1.00905	1.41596	1.49478	1.49478	1.49478	1.49478	18	0	0	0	0	0	1.8229	32.8123	0	0	0	0	0	Col mop
1	Col mop	T	0.6	0.64	0.7	0.335	1	1															0.211539	0.176283	0.352565	0.70513	1.0577	1.41026	1.76283	0.176283	0.211539	0.211539	0.211539	0.211539	0.211539	0	0	0	0	0	0	0.211539	0	0	0	0	0	0	Col mop
1	Aca tor	T	1.2	1.92	1.68	0.9	1	1			1												3.05363	1.27235	2.54469	5.08938	7.63407	10.1788	12.7235	1.27235	2.54469	3.05363	3.05363	3.05363	3.05363	0	5.5	0	0	0	0	3.23135	0	17.7724	0	0	0	0	Aca tor
1	Dic cin	T	0.7	0.92	0.38	0.325	1	1															0.232282	0.165915	0.331831	0.663661	0.995492	1.32732	1.65915	0.165915	0.232282	0.232282	0.232282	0.232282	0.232282	0	0	0	0	0	0	0.232282	0	0	0	0	0	0	Dic cin
1	Dic cin	T	0.75	0.57	0.58	0.2875	1	1			1												0.194754	0.129836	0.259672	0.519345	0.779017	1.03869	1.29836	0.129836	0.194754	0.194754	0.194754	0.194754	0.194754	0	5.5	0	0	0	0	0.206089	0	1.13349	0	0	0	0	Dic cin
1	Dic cin	T	0.55	0.28	0.18	0.115	1	1			1												0.0228512	0.0207738	0.0415476	0.0830951	0.124643	0.16619	0.207738	0.0207738	0.0228512	0.0228512	0.0228512	0.0228512	0.0228512	0	5.5	0	0	0	0	0.0241811	0	0.132996	0	0	0	0	Dic cin
1	Dic cin	T	0.7	0.67	0.84	0.3775	1	1															0.313388	0.223848	0.447697	0.895393	1.34309	1.79079	2.23848	0.223848	0.313388	0.313388	0.313388	0.313388	0.313388	0	0	0	0	0	0	0.313388	0	0	0	0	0	0	Dic cin
1	Dic cin	T	0.9	1.04	0.4	0.36	1	1			1												0.366435	0.203575	0.40715	0.814301	1.22145	1.6286	2.03575	0.203575	0.366435	0.366435	0.366435	0.366435	0.366435	0	5.5	0	0	0	0	0.387762	0	2.13269	0	0	0	0	Dic cin
1	Col mop	T	2.1	1.34	1.1	0.61	1	1	2														2.45487	0.584493	1.16899	2.33797	3.50696	4.67595	5.84493	0.584493	1.16899	2.33797	2.45487	2.45487	2.45487	18	0	0	0	0	0	2.99375	53.8874	0	0	0	0	0	Col mop
1	Col mop	T	1.15	1	0.98	0.495	2	2	1														0.294783	0.0242281	0.193825	1.5506	5.23326	12.4048	24.2281	0.0242281	0.193825	0.294783	0.294783	0.294783	0.294783	5.5	0	0	0	0	0	0.31194	1.71567	0	0	0	0	0	Col mop
1	Col mop	T	1.3	0.88	0.84	0.43	3	3	2														0.251463	0.192861	0.248373	0.290722	0.813793	2.50433	6.04908	0.192861	0.248373	0.251463	0.251463	0.251463	0.251463	18	0	0	0	0	0	0.306662	5.51992	0	0	0	0	0	Col mop
1	Col mop	T	1.1	1.46	0.98	0.61	3	3	2			2											0.4282	0.35871	0.427878	0.662728	2.63483	8.27445	19.5119	0.35871	0.427878	0.4282	0.4282	0.4282	0.4282	18	0	18	0	0	0	0.522195	9.39951	0	9.39951	0	0	0	Col mop
1	Col mop	T	0.9	0.42	0.73	0.2875	3	3	1			1											0.0778238	0.0709915	0.0779305	0.219914	1.06647	3.25814	7.43543	0.0709915	0.0778238	0.0778238	0.0778238	0.0778238	0.0778238	5.5	0	5.5	0	0	0	0.0823532	0.452943	0	0.452943	0	0	0	Col mop
1	Col mop	T	1.2	1.28	1.45	0.6825	1	1	1														1.75605	0.731687	1.46337	2.92675	4.39012	5.85349	7.31687	0.731687	1.46337	1.75605	1.75605	1.75605	1.75605	5.5	0	0	0	0	0	1.85825	10.2204	0	0	0	0	0	Col mop
1	Col mop	T	1	0.88	0.9	0.445	3	3	1														0.207164	0.181268	0.207164	0.414328	1.86448	5.80059	13.4657	0.181268	0.207164	0.207164	0.207164	0.207164	0.207164	5.5	0	0	0	0	0	0.219221	1.20572	0	0	0	0	0	Col mop
1	Col mop	T	1.1	0.75	0.94	0.4225	1	1	3														0.616873	0.280397	0.560794	1.12159	1.68238	2.24318	2.80397	0.280397	0.560794	0.616873	0.616873	0.616873	0.616873	38	0	0	0	0	0	0.994957	37.8084	0	0	0	0	0	Col mop
1	Col mop	T	1.4	1.8	1.25	0.7625	1	1	2			1											2.55716	0.913271	1.82654	3.65308	5.47962	7.30617	9.13271	0.913271	1.82654	2.55716	2.55716	2.55716	2.55716	18	0	5.5	0	0	0	3.11849	56.1327	0	14.8829	0	0	0	Col mop
1	Col mop	T	1.1	1	1.05	0.5125	1	1	1			2											0.907675	0.412579	0.825159	1.65032	2.47548	3.30064	4.12579	0.412579	0.825159	0.907675	0.907675	0.907675	0.907675	5.5	0	18	0	0	0	0.960502	5.28276	0	19.9246	0	0	0	Col mop
1	Col mop	T	1.9	1.08	1.36	0.61	2	2	2			2											0.739618	0.013479	0.107832	0.862654	2.91146	6.90123	13.479	0.013479	0.107832	0.739618	0.739618	0.739618	0.739618	18	0	18	0	0	0	0.901973	16.2355	0	16.2355	0	0	0	Col mop
1	Col mop	T	1.2	1.5	1.36	0.715	1	1	1			3											1.92727	0.80303	1.60606	3.21212	4.81818	6.42424	8.0303	0.80303	1.60606	1.92727	1.92727	1.92727	1.92727	5.5	0	38	0	0	0	2.03944	11.2169	0	118.123	0	0	0	Col mop
1	Col mop	T	2	1.25	1.15	0.6	1	1	2														2.26195	0.565487	1.13097	2.26195	3.39292	4.52389	5.65487	0.565487	1.13097	2.26195	2.26195	2.26195	2.26195	18	0	0	0	0	0	2.75847	49.6525	0	0	0	0	0	Col mop
1	Col mop	T	1.7	1.1	1.15	0.5625	1	1	1														1.68983	0.49701	0.99402	1.98804	2.98206	3.97608	4.9701	0.49701	0.99402	1.68983	1.68983	1.68983	1.68983	5.5	0	0	0	0	0	1.78818	9.83501	0	0	0	0	0	Col mop
1	Col mop	T	1.8	1.5	1.35	0.7125	1	1	2			2											2.87073	0.797425	1.59485	3.1897	4.78455	6.3794	7.97425	0.797425	1.59485	2.87073	2.87073	2.87073	2.87073	18	0	18	0	0	0	3.50089	63.016	0	63.016	0	0	0	Col mop
1	Dic cin	T	1.4	1.75	1.35	0.775	1	1															2.64169	0.94346	1.88692	3.77384	5.66076	7.54768	9.4346	0.94346	1.88692	2.64169	2.64169	2.64169	2.64169	0	0	0	0	0	0	2.64169	0	0	0	0	0	0	Dic cin
1	Col mop	T	0.8	0.45	0.4	0.2125	1	1			1												0.11349	0.0709313	0.141863	0.283725	0.425588	0.56745	0.709313	0.0709313	0.11349	0.11349	0.11349	0.11349	0.11349	0	5.5	0	0	0	0	0.120095	0	0.660524	0	0	0	0	Col mop
1	Col mop	T	0.95	0.8	0.72	0.38	1	1	3														0.430964	0.226823	0.453646	0.907292	1.36094	1.81458	2.26823	0.226823	0.430964	0.430964	0.430964	0.430964	0.430964	38	0	0	0	0	0	0.695103	26.4139	0	0	0	0	0	Col mop
1	Col mop	T	1.2	0.6	0.82	0.355	3	3	2														0.158209	0.126806	0.157477	0.205086	0.692166	2.16805	5.18209	0.126806	0.157477	0.158209	0.158209	0.158209	0.158209	18	0	0	0	0	0	0.192938	3.47289	0	0	0	0	0	Col mop
1	Col mop	T	1	0.78	0.84	0.405	1	1	1														0.5153	0.25765	0.5153	1.0306	1.5459	2.0612	2.5765	0.25765	0.5153	0.5153	0.5153	0.5153	0.5153	5.5	0	0	0	0	0	0.545291	2.9991	0	0	0	0	0	Col mop
1	Col mop	T	0.9	0.86	0.7	0.39	1	1			1												0.430053	0.238918	0.477836	0.955672	1.43351	1.91134	2.38918	0.238918	0.430053	0.430053	0.430053	0.430053	0.430053	0	5.5	0	0	0	0	0.455082	0	2.50295	0	0	0	0	Col mop
1	Col mop	T	1.3	1.3	1.1	0.6	3	3	3														0.489598	0.3755	0.483581	0.566035	1.58445	4.87593	11.7775	0.3755	0.483581	0.489598	0.489598	0.489598	0.489598	38	0	0	0	0	0	0.789675	30.0076	0	0	0	0	0	Col mop
1	Col mop	T	1.8	0.69	1.25	0.485	3	3	3														0.442945	0.276081	0.404058	0.443553	0.574188	1.25167	2.9317	0.276081	0.404058	0.442945	0.442945	0.442945	0.442945	38	0	0	0	0	0	0.714428	27.1483	0	0	0	0	0	Col mop
1	Col mop	T	1.8	1.8	1.35	0.7875	1	1	1														3.5069	0.974139	1.94828	3.89656	5.84483	7.79311	9.74139	0.974139	1.94828	3.5069	3.5069	3.5069	3.5069	5.5	0	0	0	0	0	3.71101	20.4105	0	0	0	0	0	Col mop
1	Col mop	T	2	1.45	1.23	0.67	1	1	2														2.82052	0.70513	1.41026	2.82052	4.23078	5.64104	7.0513	0.70513	1.41026	2.82052	2.82052	2.82052	2.82052	18	0	0	0	0	0	3.43966	61.9139	0	0	0	0	0	Col mop
1	Col mop	T	1.55	0.6	1.4	0.5	2	2	2			1											0.405383	0.0136076	0.108861	0.870885	2.93924	6.96708	13.6076	0.0136076	0.108861	0.405383	0.405383	0.405383	0.405383	18	0	5.5	0	0	0	0.49437	8.89866	0	2.35937	0	0	0	Col mop
1	Col mop	T	1.1	0.7	0.6	0.325	3	3	3														0.12155	0.101824	0.121458	0.188123	0.747927	2.3488	5.53868	0.101824	0.121458	0.12155	0.12155	0.12155	0.12155	38	0	0	0	0	0	0.196048	7.44981	0	0	0	0	0	Col mop
1	Dic cin	T	2.6	2.35	0.32	0.6675	3	3															1.21191	0.57334	0.92948	1.19702	1.21632	1.40111	2.16511	0.57334	0.92948	1.19702	1.21191	1.21191	1.21191	0	0	0	0	0	0	1.21191	0	0	0	0	0	0	Dic cin
1	Col mop	T	1.75	1.45	1.2	0.6625	3	3	2			1											0.803533	0.510701	0.740281	0.805876	1.09637	2.51133	5.95036	0.510701	0.740281	0.803533	0.803533	0.803533	0.803533	18	0	5.5	0	0	0	0.979919	17.6385	0	4.67665	0	0	0	Col mop
1	Col mop	T	1.8	0.82	1.04	0.465	1	1	2														1.22272	0.339645	0.679291	1.35858	2.03787	2.71716	3.39645	0.339645	0.679291	1.22272	1.22272	1.22272	1.22272	18	0	0	0	0	0	1.49113	26.8403	0	0	0	0	0	Col mop
1	Col mop	T	1.5	0.94	1.04	0.495	1	1	2														1.15465	0.384884	0.769769	1.53954	2.30931	3.07907	3.84884	0.384884	0.769769	1.15465	1.15465	1.15465	1.15465	18	0	0	0	0	0	1.40811	25.346	0	0	0	0	0	Col mop
1	Col mop	T	1.4	1.1	1.55	0.6625	3	3	1														0.642827	0.472047	0.627834	0.693428	1.60238	4.76029	11.5728	0.472047	0.627834	0.642827	0.642827	0.642827	0.642827	5.5	0	0	0	0	0	0.68024	3.74132	0	0	0	0	0	Col mop
1	Col mop	T	1.5	1	1.1	0.525	3	3	2														0.432518	0.304364	0.416499	0.448537	0.865036	2.43491	5.9271	0.304364	0.416499	0.432518	0.432518	0.432518	0.432518	18	0	0	0	0	0	0.527461	9.49429	0	0	0	0	0	Col mop
1	Col mop	T	1.55	1.57	2.15	0.93	3	3	2														1.40246	0.966486	1.3398	1.43678	2.55062	6.941	16.8676	0.966486	1.3398	1.40246	1.40246	1.40246	1.40246	18	0	0	0	0	0	1.71032	30.7858	0	0	0	0	0	Col mop
1	Col mop	T	2.4	1.2	0.82	0.505	7	7	2														1.78771	0.400592	0.801185	1.60107	0.991169	-6.55471	-27.3135	0.400592	0.801185	1.60107	1.78771	1.78771	1.78771	18	0	0	0	0	0	2.18013	39.2424	0	0	0	0	0	Col mop
1	Col mop	T	2.1	1.12	1.29	0.6025	3	3	3														0.797494	0.444775	0.682878	0.797408	0.860271	1.38814	2.89771	0.444775	0.682878	0.797408	0.797494	0.797494	0.797494	38	0	0	0	0	0	1.28628	48.8787	0	0	0	0	0	Col mop
1	Col mop	T	1.5	0.8	1.27	0.5175	1	1	3														1.26201	0.420669	0.841338	1.68268	2.52401	3.36535	4.20669	0.420669	0.841338	1.26201	1.26201	1.26201	1.26201	38	0	0	0	0	0	2.0355	77.3488	0	0	0	0	0	Col mop
1	Col mop	T	1.6	1.65	0.72	0.5925	2	2															0.587612	0.0179325	0.14346	1.14768	3.87342	9.18144	17.9325	0.0179325	0.14346	0.587612	0.587612	0.587612	0.587612	0	0	0	0	0	0	0.587612	0	0	0	0	0	0	Col mop
1	Col mop	T	2.1	1.38	0.68	0.515	3	3	2														0.582677	0.324968	0.498934	0.582614	0.628544	1.01423	2.11717	0.324968	0.498934	0.582614	0.582677	0.582677	0.582677	18	0	0	0	0	0	0.710582	12.7905	0	0	0	0	0	Col mop
1	Col mop	T	0.7	0.4	0.5	0.225	1	1															0.11133	0.0795216	0.159043	0.318086	0.477129	0.636173	0.795216	0.0795216	0.11133	0.11133	0.11133	0.11133	0.11133	0	0	0	0	0	0	0.11133	0	0	0	0	0	0	Col mop
1	Col mop	T	2.24	1.18	1.26	0.61	3	3			1												0.871971	0.46327	0.724052	0.870898	0.906027	1.29493	2.50309	0.46327	0.724052	0.870898	0.871971	0.871971	0.871971	0	5.5	0	0	0	0	0.92272	0	5.07496	0	0	0	0	Col mop
1	Col mop	T	2.1	0.92	0.35	0.3175	7	7	3														0.63147	0.158346	0.316692	0.622552	-0.938305	-10.1413	-33.2633	0.158346	0.316692	0.622552	0.63147	0.63147	0.63147	38	0	0	0	0	0	1.0185	38.703	0	0	0	0	0	Col mop
1	Col mop	T	1.6	0.9	0.66	0.39	3	3	3														0.254591	0.171861	0.241165	0.258569	0.425147	1.11384	2.69757	0.171861	0.241165	0.254591	0.254591	0.254591	0.254591	38	0	0	0	0	0	0.410631	15.604	0	0	0	0	0	Col mop
1	Col mop	T	1.5	0.95	1.1	0.5125	3	3	2														0.412167	0.290043	0.396901	0.427432	0.824334	2.32035	5.64821	0.290043	0.396901	0.412167	0.412167	0.412167	0.412167	18	0	0	0	0	0	0.502643	9.04757	0	0	0	0	0	Col mop
1	Col mop	T	1.4	0.78	1	0.445	1	1	2														0.870959	0.311057	0.622114	1.24423	1.86634	2.48846	3.11057	0.311057	0.622114	0.870959	0.870959	0.870959	0.870959	18	0	0	0	0	0	1.06215	19.1186	0	0	0	0	0	Col mop
1	Col mop	T	1.75	1.55	1.5	0.7625	1	1	3														3.19645	0.913271	1.82654	3.65308	5.47962	7.30617	9.13271	0.913271	1.82654	3.19645	3.19645	3.19645	3.19645	38	0	0	0	0	0	5.15556	195.911	0	0	0	0	0	Col mop
1	Col mop	T	1.2	0.7	1.04	0.435	3	3	2														0.237549	0.190397	0.23645	0.307934	1.03928	3.25531	7.78084	0.190397	0.23645	0.237549	0.237549	0.237549	0.237549	18	0	0	0	0	0	0.289694	5.2145	0	0	0	0	0	Col mop
1	Col mop	T	1.3	1.48	1.38	0.715	3	3	3														0.695264	0.533236	0.686719	0.80381	2.25003	6.92416	16.7249	0.533236	0.686719	0.695264	0.695264	0.695264	0.695264	38	0	0	0	0	0	1.12139	42.6129	0	0	0	0	0	Col mop
1	Col mop	T	0.5	0.67	0.73	0.35	1	1															0.192423	0.192423	0.384845	0.76969	1.15454	1.53938	1.92423	0.192423	0.192423	0.192423	0.192423	0.192423	0.192423	0	0	0	0	0	0	0.192423	0	0	0	0	0	0	Col mop
1	Gre bic	T	2.4	3.9	2.9	1.7	1	1	2														21.7901	4.5396	9.0792	18.1584	27.2376	36.3168	45.396	4.5396	9.0792	18.1584	21.7901	21.7901	21.7901	18	0	0	0	0	0	26.5733	478.319	0	0	0	0	0	Gre bic
1	Col mop	C	1.6	1.6	7.7	2.325	1	1				2											27.1716	8.49114	16.9823	33.9645	50.9468	67.9291	84.9114	8.49114	16.9823	27.1716	27.1716	27.1716	27.1716	0	0	18	0	0	0	27.1716	0	0	596.451	0	0	0	Col mop
1	Col mop	T	1.3	1.2	1.1	0.575	1	1			1												1.3503	0.519345	1.03869	2.07738	3.11607	4.15476	5.19345	0.519345	1.03869	1.3503	1.3503	1.3503	1.3503	0	5.5	0	0	0	0	1.42888	0	7.85886	0	0	0	0	Col mop
1	Col mop	T	0.7	1.42	1	0.605	3	3	1			1											0.268042	0.26179	0.289142	1.98492	9.77611	28.3515	62.3999	0.26179	0.268042	0.268042	0.268042	0.268042	0.268042	5.5	0	5.5	0	0	0	0.283642	1.56003	0	1.56003	0	0	0	Col mop
1	Gre bic	T	2.1	2.7	2.9	1.4	1	1	3			1											12.9308	3.07876	6.15752	12.315	18.4726	24.6301	30.7876	3.07876	6.15752	12.315	12.9308	12.9308	12.9308	38	0	5.5	0	0	0	20.8561	792.533	0	75.2586	0	0	0	Gre bic
1	Gre bic	T	1.85	2.15	2.6	1.1875	1	1	3														8.19575	2.21507	4.43014	8.86027	13.2904	17.7205	22.1507	2.21507	4.43014	8.19575	8.19575	8.19575	8.19575	38	0	0	0	0	0	13.219	502.32	0	0	0	0	0	Gre bic
1	Aca tor	T	0.4	0.96	0.75	0.4275	3	3															0.0764762	0.0776711	0.334583	4.97095	21.0788	55.8276	116.387	0.0764762	0.0764762	0.0764762	0.0764762	0.0764762	0.0764762	0	0	0	0	0	0	0.0764762	0	0	0	0	0	0	Aca tor
1	Aca tor	T	0.5	0.6	0.73	0.3325	3	3						1									0.0578292	0.0578292	0.115658	1.61922	7.28648	19.8933	42.2153	0.0578292	0.0578292	0.0578292	0.0578292	0.0578292	0.0578292	0	0	0	5.5	0	0	0.0578292	0	0	0	0.336572	0	0	Aca tor
1	Dic cin	T	0.9	0.48	0.7	0.295	1	1															0.246057	0.136699	0.273397	0.546794	0.820191	1.09359	1.36699	0.136699	0.246057	0.246057	0.246057	0.246057	0.246057	0	0	0	0	0	0	0.246057	0	0	0	0	0	0	Dic cin
1	Dic cin	T	1.3	0.8	1.26	0.515	3	3						1									0.360705	0.276644	0.356272	0.417019	1.16732	3.59227	8.67695	0.276644	0.356272	0.360705	0.360705	0.360705	0.360705	0	0	0	5.5	0	0	0.360705	0	0	0	2.09934	0	0	Dic cin
1	Dic cin	T	0.9	1.5	0.7	0.55	3	3			2												0.284814	0.25981	0.285205	0.804825	3.90301	11.9239	27.2117	0.25981	0.284814	0.284814	0.284814	0.284814	0.284814	0	18	0	0	0	0	0.347335	0	6.25202	0	0	0	0	Dic cin
1	Aca tor	T	0.8	1.3	0.78	0.52	1	1			1												0.679589	0.424743	0.849487	1.69897	2.54846	3.39795	4.24743	0.424743	0.679589	0.679589	0.679589	0.679589	0.679589	0	5.5	0	0	0	0	0.719142	0	3.95528	0	0	0	0	Aca tor
1	Com mos	T	1.35	0.4	0.75	0.2875	1	1			1												0.350558	0.129836	0.259672	0.519345	0.779017	1.03869	1.29836	0.129836	0.259672	0.350558	0.350558	0.350558	0.350558	0	5.5	0	0	0	0	0.37096	0	2.04028	0	0	0	0	Com mos
1	Gre bic	T	0.98	1.37	1.15	0.63	1	1				4											1.22196	0.623449	1.2469	2.4938	3.74069	4.98759	6.23449	0.623449	1.22196	1.22196	1.22196	1.22196	1.22196	0	0	63	0	0	0	1.22196	0	0	208.063	0	0	0	Gre bic
1	Gre bic	T	1.8	1.85	1.75	0.9	3	3	1														1.52529	0.950689	1.39138	1.52738	1.97722	4.31014	10.0954	0.950689	1.39138	1.52529	1.52529	1.52529	1.52529	5.5	0	0	0	0	0	1.61406	8.87733	0	0	0	0	0	Gre bic
1	Gre bic	T	2	2.05	1.85	0.975	3	3	2														1.98899	1.14989	1.74037	1.98899	2.23762	3.97799	8.70185	1.14989	1.74037	1.98899	1.98899	1.98899	1.98899	18	0	0	0	0	0	2.4256	43.6608	0	0	0	0	0	Gre bic
1	Col mop	C	2.6	11.45	4.25	3.925	1	1	2														125.835	24.1991	48.3982	96.7964	145.195	193.593	241.991	24.1991	48.3982	96.7964	125.835	125.835	125.835	18	0	0	0	0	0	153.458	2762.24	0	0	0	0	0	Col mop
1	Ere amo	T	1.2	1.6	2.15	0.9375	3	3			1												1.10336	0.88435	1.09825	1.43028	4.82721	15.1201	36.1402	0.88435	1.09825	1.10336	1.10336	1.10336	1.10336	0	5.5	0	0	0	0	1.16758	0	6.42168	0	0	0	0	Ere amo
1	Gre bic	T	1.3	2.3	2.35	1.1625	3	3	2		1												1.83791	1.40959	1.81532	2.12484	5.94789	18.3038	44.2118	1.40959	1.81532	1.83791	1.83791	1.83791	1.83791	18	5.5	0	0	0	0	2.40249	43.2449	13.2137	0	0	0	0	Gre bic
						#DIV/0!		#DIV/0!															#DIV/0!	#DIV/0!	#DIV/0!	#DIV/0!	#DIV/0!	#DIV/0!	#DIV/0!	#DIV/0!	#DIV/0!	#DIV/0!	#DIV/0!	#DIV/0!	#DIV/0!	0	0	0	0	0	0	#DIV/0!	#DIV/0!	#DIV/0!	#DIV/0!	#DIV/0!	#DIV/0!	#DIV/0!	0
						#DIV/0!		#DIV/0!															#DIV/0!	#DIV/0!	#DIV/0!	#DIV/0!	#DIV/0!	#DIV/0!	#DIV/0!	#DIV/0!	#DIV/0!	#DIV/0!	#DIV/0!	#DIV/0!	#DIV/0!	0	0	0	0	0	0	#DIV/0!	#DIV/0!	#DIV/0!	#DIV/0!	#DIV/0!	#DIV/0!	#DIV/0!	0
						#DIV/0!		#DIV/0!															#DIV/0!	#DIV/0!	#DIV/0!	#DIV/0!	#DIV/0!	#DIV/0!	#DIV/0!	#DIV/0!	#DIV/0!	#DIV/0!	#DIV/0!	#DIV/0!	#DIV/0!	0	0	0	0	0	0	#DIV/0!	#DIV/0!	#DIV/0!	#DIV/0!	#DIV/0!	#DIV/0!	#DIV/0!	0
						#DIV/0!		#DIV/0!															#DIV/0!	#DIV/0!	#DIV/0!	#DIV/0!	#DIV/0!	#DIV/0!	#DIV/0!	#DIV/0!	#DIV/0!	#DIV/0!	#DIV/0!	#DIV/0!	#DIV/0!	0	0	0	0	0	0	#DIV/0!	#DIV/0!	#DIV/0!	#DIV/0!	#DIV/0!	#DIV/0!	#DIV/0!	0
						#DIV/0!		#DIV/0!															#DIV/0!	#DIV/0!	#DIV/0!	#DIV/0!	#DIV/0!	#DIV/0!	#DIV/0!	#DIV/0!	#DIV/0!	#DIV/0!	#DIV/0!	#DIV/0!	#DIV/0!	0	0	0	0	0	0	#DIV/0!	#DIV/0!	#DIV/0!	#DIV/0!	#DIV/0!	#DIV/0!	#DIV/0!	0
						#DIV/0!		#DIV/0!															#DIV/0!	#DIV/0!	#DIV/0!	#DIV/0!	#DIV/0!	#DIV/0!	#DIV/0!	#DIV/0!	#DIV/0!	#DIV/0!	#DIV/0!	#DIV/0!	#DIV/0!	0	0	0	0	0	0	#DIV/0!	#DIV/0!	#DIV/0!	#DIV/0!	#DIV/0!	#DIV/0!	#DIV/0!	0
						#DIV/0!		#DIV/0!															#DIV/0!	#DIV/0!	#DIV/0!	#DIV/0!	#DIV/0!	#DIV/0!	#DIV/0!	#DIV/0!	#DIV/0!	#DIV/0!	#DIV/0!	#DIV/0!	#DIV/0!	0	0	0	0	0	0	#DIV/0!	#DIV/0!	#DIV/0!	#DIV/0!	#DIV/0!	#DIV/0!	#DIV/0!	0
						#DIV/0!		#DIV/0!															#DIV/0!	#DIV/0!	#DIV/0!	#DIV/0!	#DIV/0!	#DIV/0!	#DIV/0!	#DIV/0!	#DIV/0!	#DIV/0!	#DIV/0!	#DIV/0!	#DIV/0!	0	0	0	0	0	0	#DIV/0!	#DIV/0!	#DIV/0!	#DIV/0!	#DIV/0!	#DIV/0!	#DIV/0!	0
						#DIV/0!		#DIV/0!															#DIV/0!	#DIV/0!	#DIV/0!	#DIV/0!	#DIV/0!	#DIV/0!	#DIV/0!	#DIV/0!	#DIV/0!	#DIV/0!	#DIV/0!	#DIV/0!	#DIV/0!	0	0	0	0	0	0	#DIV/0!	#DIV/0!	#DIV/0!	#DIV/0!	#DIV/0!	#DIV/0!	#DIV/0!	0
						#DIV/0!		#DIV/0!															#DIV/0!	#DIV/0!	#DIV/0!	#DIV/0!	#DIV/0!	#DIV/0!	#DIV/0!	#DIV/0!	#DIV/0!	#DIV/0!	#DIV/0!	#DIV/0!	#DIV/0!	0	0	0	0	0	0	#DIV/0!	#DIV/0!	#DIV/0!	#DIV/0!	#DIV/0!	#DIV/0!	#DIV/0!	0
						#DIV/0!		#DIV/0!															#DIV/0!	#DIV/0!	#DIV/0!	#DIV/0!	#DIV/0!	#DIV/0!	#DIV/0!	#DIV/0!	#DIV/0!	#DIV/0!	#DIV/0!	#DIV/0!	#DIV/0!	0	0	0	0	0	0	#DIV/0!	#DIV/0!	#DIV/0!	#DIV/0!	#DIV/0!	#DIV/0!	#DIV/0!	0
						#DIV/0!		#DIV/0!															#DIV/0!	#DIV/0!	#DIV/0!	#DIV/0!	#DIV/0!	#DIV/0!	#DIV/0!	#DIV/0!	#DIV/0!	#DIV/0!	#DIV/0!	#DIV/0!	#DIV/0!	0	0	0	0	0	0	#DIV/0!	#DIV/0!	#DIV/0!	#DIV/0!	#DIV/0!	#DIV/0!	#DIV/0!	0
						#DIV/0!		#DIV/0!															#DIV/0!	#DIV/0!	#DIV/0!	#DIV/0!	#DIV/0!	#DIV/0!	#DIV/0!	#DIV/0!	#DIV/0!	#DIV/0!	#DIV/0!	#DIV/0!	#DIV/0!	0	0	0	0	0	0	#DIV/0!	#DIV/0!	#DIV/0!	#DIV/0!	#DIV/0!	#DIV/0!	#DIV/0!	0
						#DIV/0!		#DIV/0!															#DIV/0!	#DIV/0!	#DIV/0!	#DIV/0!	#DIV/0!	#DIV/0!	#DIV/0!	#DIV/0!	#DIV/0!	#DIV/0!	#DIV/0!	#DIV/0!	#DIV/0!	0	0	0	0	0	0	#DIV/0!	#DIV/0!	#DIV/0!	#DIV/0!	#DIV/0!	#DIV/0!	#DIV/0!	0
						#DIV/0!		#DIV/0!															#DIV/0!	#DIV/0!	#DIV/0!	#DIV/0!	#DIV/0!	#DIV/0!	#DIV/0!	#DIV/0!	#DIV/0!	#DIV/0!	#DIV/0!	#DIV/0!	#DIV/0!	0	0	0	0	0	0	#DIV/0!	#DIV/0!	#DIV/0!	#DIV/0!	#DIV/0!	#DIV/0!	#DIV/0!	0
						#DIV/0!		#DIV/0!															#DIV/0!	#DIV/0!	#DIV/0!	#DIV/0!	#DIV/0!	#DIV/0!	#DIV/0!	#DIV/0!	#DIV/0!	#DIV/0!	#DIV/0!	#DIV/0!	#DIV/0!	0	0	0	0	0	0	#DIV/0!	#DIV/0!	#DIV/0!	#DIV/0!	#DIV/0!	#DIV/0!	#DIV/0!	0
						#DIV/0!		#DIV/0!															#DIV/0!	#DIV/0!	#DIV/0!	#DIV/0!	#DIV/0!	#DIV/0!	#DIV/0!	#DIV/0!	#DIV/0!	#DIV/0!	#DIV/0!	#DIV/0!	#DIV/0!	0	0	0	0	0	0	#DIV/0!	#DIV/0!	#DIV/0!	#DIV/0!	#DIV/0!	#DIV/0!	#DIV/0!	0
						#DIV/0!		#DIV/0!															#DIV/0!	#DIV/0!	#DIV/0!	#DIV/0!	#DIV/0!	#DIV/0!	#DIV/0!	#DIV/0!	#DIV/0!	#DIV/0!	#DIV/0!	#DIV/0!	#DIV/0!	0	0	0	0	0	0	#DIV/0!	#DIV/0!	#DIV/0!	#DIV/0!	#DIV/0!	#DIV/0!	#DIV/0!	0
						#DIV/0!		#DIV/0!															#DIV/0!	#DIV/0!	#DIV/0!	#DIV/0!	#DIV/0!	#DIV/0!	#DIV/0!	#DIV/0!	#DIV/0!	#DIV/0!	#DIV/0!	#DIV/0!	#DIV/0!	0	0	0	0	0	0	#DIV/0!	#DIV/0!	#DIV/0!	#DIV/0!	#DIV/0!	#DIV/0!	#DIV/0!	0
						#DIV/0!		#DIV/0!															#DIV/0!	#DIV/0!	#DIV/0!	#DIV/0!	#DIV/0!	#DIV/0!	#DIV/0!	#DIV/0!	#DIV/0!	#DIV/0!	#DIV/0!	#DIV/0!	#DIV/0!	0	0	0	0	0	0	#DIV/0!	#DIV/0!	#DIV/0!	#DIV/0!	#DIV/0!	#DIV/0!	#DIV/0!	0
						#DIV/0!		#DIV/0!															#DIV/0!	#DIV/0!	#DIV/0!	#DIV/0!	#DIV/0!	#DIV/0!	#DIV/0!	#DIV/0!	#DIV/0!	#DIV/0!	#DIV/0!	#DIV/0!	#DIV/0!	0	0	0	0	0	0	#DIV/0!	#DIV/0!	#DIV/0!	#DIV/0!	#DIV/0!	#DIV/0!	#DIV/0!	0
						#DIV/0!		#DIV/0!															#DIV/0!	#DIV/0!	#DIV/0!	#DIV/0!	#DIV/0!	#DIV/0!	#DIV/0!	#DIV/0!	#DIV/0!	#DIV/0!	#DIV/0!	#DIV/0!	#DIV/0!	0	0	0	0	0	0	#DIV/0!	#DIV/0!	#DIV/0!	#DIV/0!	#DIV/0!	#DIV/0!	#DIV/0!	0
						#DIV/0!		#DIV/0!															#DIV/0!	#DIV/0!	#DIV/0!	#DIV/0!	#DIV/0!	#DIV/0!	#DIV/0!	#DIV/0!	#DIV/0!	#DIV/0!	#DIV/0!	#DIV/0!	#DIV/0!	0	0	0	0	0	0	#DIV/0!	#DIV/0!	#DIV/0!	#DIV/0!	#DIV/0!	#DIV/0!	#DIV/0!	0
						#DIV/0!		#DIV/0!															#DIV/0!	#DIV/0!	#DIV/0!	#DIV/0!	#DIV/0!	#DIV/0!	#DIV/0!	#DIV/0!	#DIV/0!	#DIV/0!	#DIV/0!	#DIV/0!	#DIV/0!	0	0	0	0	0	0	#DIV/0!	#DIV/0!	#DIV/0!	#DIV/0!	#DIV/0!	#DIV/0!	#DIV/0!	0
						#DIV/0!		#DIV/0!															#DIV/0!	#DIV/0!	#DIV/0!	#DIV/0!	#DIV/0!	#DIV/0!	#DIV/0!	#DIV/0!	#DIV/0!	#DIV/0!	#DIV/0!	#DIV/0!	#DIV/0!	0	0	0	0	0	0	#DIV/0!	#DIV/0!	#DIV/0!	#DIV/0!	#DIV/0!	#DIV/0!	#DIV/0!	0
						#DIV/0!		#DIV/0!															#DIV/0!	#DIV/0!	#DIV/0!	#DIV/0!	#DIV/0!	#DIV/0!	#DIV/0!	#DIV/0!	#DIV/0!	#DIV/0!	#DIV/0!	#DIV/0!	#DIV/0!	0	0	0	0	0	0	#DIV/0!	#DIV/0!	#DIV/0!	#DIV/0!	#DIV/0!	#DIV/0!	#DIV/0!	0
						#DIV/0!		#DIV/0!															#DIV/0!	#DIV/0!	#DIV/0!	#DIV/0!	#DIV/0!	#DIV/0!	#DIV/0!	#DIV/0!	#DIV/0!	#DIV/0!	#DIV/0!	#DIV/0!	#DIV/0!	0	0	0	0	0	0	#DIV/0!	#DIV/0!	#DIV/0!	#DIV/0!	#DIV/0!	#DIV/0!	#DIV/0!	0
						#DIV/0!		#DIV/0!															#DIV/0!	#DIV/0!	#DIV/0!	#DIV/0!	#DIV/0!	#DIV/0!	#DIV/0!	#DIV/0!	#DIV/0!	#DIV/0!	#DIV/0!	#DIV/0!	#DIV/0!	0	0	0	0	0	0	#DIV/0!	#DIV/0!	#DIV/0!	#DIV/0!	#DIV/0!	#DIV/0!	#DIV/0!	0
						#DIV/0!		#DIV/0!															#DIV/0!	#DIV/0!	#DIV/0!	#DIV/0!	#DIV/0!	#DIV/0!	#DIV/0!	#DIV/0!	#DIV/0!	#DIV/0!	#DIV/0!	#DIV/0!	#DIV/0!	0	0	0	0	0	0	#DIV/0!	#DIV/0!	#DIV/0!	#DIV/0!	#DIV/0!	#DIV/0!	#DIV/0!	0
						#DIV/0!		#DIV/0!															#DIV/0!	#DIV/0!	#DIV/0!	#DIV/0!	#DIV/0!	#DIV/0!	#DIV/0!	#DIV/0!	#DIV/0!	#DIV/0!	#DIV/0!	#DIV/0!	#DIV/0!	0	0	0	0	0	0	#DIV/0!	#DIV/0!	#DIV/0!	#DIV/0!	#DIV/0!	#DIV/0!	#DIV/0!	0
						#DIV/0!		#DIV/0!															#DIV/0!	#DIV/0!	#DIV/0!	#DIV/0!	#DIV/0!	#DIV/0!	#DIV/0!	#DIV/0!	#DIV/0!	#DIV/0!	#DIV/0!	#DIV/0!	#DIV/0!	0	0	0	0	0	0	#DIV/0!	#DIV/0!	#DIV/0!	#DIV/0!	#DIV/0!	#DIV/0!	#DIV/0!	0
						#DIV/0!		#DIV/0!															#DIV/0!	#DIV/0!	#DIV/0!	#DIV/0!	#DIV/0!	#DIV/0!	#DIV/0!	#DIV/0!	#DIV/0!	#DIV/0!	#DIV/0!	#DIV/0!	#DIV/0!	0	0	0	0	0	0	#DIV/0!	#DIV/0!	#DIV/0!	#DIV/0!	#DIV/0!	#DIV/0!	#DIV/0!	0
						#DIV/0!		#DIV/0!															#DIV/0!	#DIV/0!	#DIV/0!	#DIV/0!	#DIV/0!	#DIV/0!	#DIV/0!	#DIV/0!	#DIV/0!	#DIV/0!	#DIV/0!	#DIV/0!	#DIV/0!	0	0	0	0	0	0	#DIV/0!	#DIV/0!	#DIV/0!	#DIV/0!	#DIV/0!	#DIV/0!	#DIV/0!	0
						#DIV/0!		#DIV/0!															#DIV/0!	#DIV/0!	#DIV/0!	#DIV/0!	#DIV/0!	#DIV/0!	#DIV/0!	#DIV/0!	#DIV/0!	#DIV/0!	#DIV/0!	#DIV/0!	#DIV/0!	0	0	0	0	0	0	#DIV/0!	#DIV/0!	#DIV/0!	#DIV/0!	#DIV/0!	#DIV/0!	#DIV/0!	0
						#DIV/0!		#DIV/0!															#DIV/0!	#DIV/0!	#DIV/0!	#DIV/0!	#DIV/0!	#DIV/0!	#DIV/0!	#DIV/0!	#DIV/0!	#DIV/0!	#DIV/0!	#DIV/0!	#DIV/0!	0	0	0	0	0	0	#DIV/0!	#DIV/0!	#DIV/0!	#DIV/0!	#DIV/0!	#DIV/0!	#DIV/0!	0
						#DIV/0!		#DIV/0!															#DIV/0!	#DIV/0!	#DIV/0!	#DIV/0!	#DIV/0!	#DIV/0!	#DIV/0!	#DIV/0!	#DIV/0!	#DIV/0!	#DIV/0!	#DIV/0!	#DIV/0!	0	0	0	0	0	0	#DIV/0!	#DIV/0!	#DIV/0!	#DIV/0!	#DIV/0!	#DIV/0!	#DIV/0!	0
						#DIV/0!		#DIV/0!															#DIV/0!	#DIV/0!	#DIV/0!	#DIV/0!	#DIV/0!	#DIV/0!	#DIV/0!	#DIV/0!	#DIV/0!	#DIV/0!	#DIV/0!	#DIV/0!	#DIV/0!	0	0	0	0	0	0	#DIV/0!	#DIV/0!	#DIV/0!	#DIV/0!	#DIV/0!	#DIV/0!	#DIV/0!	0
						#DIV/0!		#DIV/0!															#DIV/0!	#DIV/0!	#DIV/0!	#DIV/0!	#DIV/0!	#DIV/0!	#DIV/0!	#DIV/0!	#DIV/0!	#DIV/0!	#DIV/0!	#DIV/0!	#DIV/0!	0	0	0	0	0	0	#DIV/0!	#DIV/0!	#DIV/0!	#DIV/0!	#DIV/0!	#DIV/0!	#DIV/0!	0
						#DIV/0!		#DIV/0!															#DIV/0!	#DIV/0!	#DIV/0!	#DIV/0!	#DIV/0!	#DIV/0!	#DIV/0!	#DIV/0!	#DIV/0!	#DIV/0!	#DIV/0!	#DIV/0!	#DIV/0!	0	0	0	0	0	0	#DIV/0!	#DIV/0!	#DIV/0!	#DIV/0!	#DIV/0!	#DIV/0!	#DIV/0!	0
						#DIV/0!		#DIV/0!															#DIV/0!	#DIV/0!	#DIV/0!	#DIV/0!	#DIV/0!	#DIV/0!	#DIV/0!	#DIV/0!	#DIV/0!	#DIV/0!	#DIV/0!	#DIV/0!	#DIV/0!	0	0	0	0	0	0	#DIV/0!	#DIV/0!	#DIV/0!	#DIV/0!	#DIV/0!	#DIV/0!	#DIV/0!	0
						#DIV/0!		#DIV/0!															#DIV/0!	#DIV/0!	#DIV/0!	#DIV/0!	#DIV/0!	#DIV/0!	#DIV/0!	#DIV/0!	#DIV/0!	#DIV/0!	#DIV/0!	#DIV/0!	#DIV/0!	0	0	0	0	0	0	#DIV/0!	#DIV/0!	#DIV/0!	#DIV/0!	#DIV/0!	#DIV/0!	#DIV/0!	0
						#DIV/0!		#DIV/0!															#DIV/0!	#DIV/0!	#DIV/0!	#DIV/0!	#DIV/0!	#DIV/0!	#DIV/0!	#DIV/0!	#DIV/0!	#DIV/0!	#DIV/0!	#DIV/0!	#DIV/0!	0	0	0	0	0	0	#DIV/0!	#DIV/0!	#DIV/0!	#DIV/0!	#DIV/0!	#DIV/0!	#DIV/0!	0
						#DIV/0!		#DIV/0!															#DIV/0!	#DIV/0!	#DIV/0!	#DIV/0!	#DIV/0!	#DIV/0!	#DIV/0!	#DIV/0!	#DIV/0!	#DIV/0!	#DIV/0!	#DIV/0!	#DIV/0!	0	0	0	0	0	0	#DIV/0!	#DIV/0!	#DIV/0!	#DIV/0!	#DIV/0!	#DIV/0!	#DIV/0!	0
						#DIV/0!		#DIV/0!															#DIV/0!	#DIV/0!	#DIV/0!	#DIV/0!	#DIV/0!	#DIV/0!	#DIV/0!	#DIV/0!	#DIV/0!	#DIV/0!	#DIV/0!	#DIV/0!	#DIV/0!	0	0	0	0	0	0	#DIV/0!	#DIV/0!	#DIV/0!	#DIV/0!	#DIV/0!	#DIV/0!	#DIV/0!	0
						#DIV/0!		#DIV/0!															#DIV/0!	#DIV/0!	#DIV/0!	#DIV/0!	#DIV/0!	#DIV/0!	#DIV/0!	#DIV/0!	#DIV/0!	#DIV/0!	#DIV/0!	#DIV/0!	#DIV/0!	0	0	0	0	0	0	#DIV/0!	#DIV/0!	#DIV/0!	#DIV/0!	#DIV/0!	#DIV/0!	#DIV/0!	0
						#DIV/0!		#DIV/0!															#DIV/0!	#DIV/0!	#DIV/0!	#DIV/0!	#DIV/0!	#DIV/0!	#DIV/0!	#DIV/0!	#DIV/0!	#DIV/0!	#DIV/0!	#DIV/0!	#DIV/0!	0	0	0	0	0	0	#DIV/0!	#DIV/0!	#DIV/0!	#DIV/0!	#DIV/0!	#DIV/0!	#DIV/0!	0
						#DIV/0!		#DIV/0!															#DIV/0!	#DIV/0!	#DIV/0!	#DIV/0!	#DIV/0!	#DIV/0!	#DIV/0!	#DIV/0!	#DIV/0!	#DIV/0!	#DIV/0!	#DIV/0!	#DIV/0!	0	0	0	0	0	0	#DIV/0!	#DIV/0!	#DIV/0!	#DIV/0!	#DIV/0!	#DIV/0!	#DIV/0!	0
						#DIV/0!		#DIV/0!															#DIV/0!	#DIV/0!	#DIV/0!	#DIV/0!	#DIV/0!	#DIV/0!	#DIV/0!	#DIV/0!	#DIV/0!	#DIV/0!	#DIV/0!	#DIV/0!	#DIV/0!	0	0	0	0	0	0	#DIV/0!	#DIV/0!	#DIV/0!	#DIV/0!	#DIV/0!	#DIV/0!	#DIV/0!	0
						#DIV/0!		#DIV/0!															#DIV/0!	#DIV/0!	#DIV/0!	#DIV/0!	#DIV/0!	#DIV/0!	#DIV/0!	#DIV/0!	#DIV/0!	#DIV/0!	#DIV/0!	#DIV/0!	#DIV/0!	0	0	0	0	0	0	#DIV/0!	#DIV/0!	#DIV/0!	#DIV/0!	#DIV/0!	#DIV/0!	#DIV/0!	0
						#DIV/0!		#DIV/0!															#DIV/0!	#DIV/0!	#DIV/0!	#DIV/0!	#DIV/0!	#DIV/0!	#DIV/0!	#DIV/0!	#DIV/0!	#DIV/0!	#DIV/0!	#DIV/0!	#DIV/0!	0	0	0	0	0	0	#DIV/0!	#DIV/0!	#DIV/0!	#DIV/0!	#DIV/0!	#DIV/0!	#DIV/0!	0
						#DIV/0!		#DIV/0!															#DIV/0!	#DIV/0!	#DIV/0!	#DIV/0!	#DIV/0!	#DIV/0!	#DIV/0!	#DIV/0!	#DIV/0!	#DIV/0!	#DIV/0!	#DIV/0!	#DIV/0!	0	0	0	0	0	0	#DIV/0!	#DIV/0!	#DIV/0!	#DIV/0!	#DIV/0!	#DIV/0!	#DIV/0!	0
						#DIV/0!		#DIV/0!															#DIV/0!	#DIV/0!	#DIV/0!	#DIV/0!	#DIV/0!	#DIV/0!	#DIV/0!	#DIV/0!	#DIV/0!	#DIV/0!	#DIV/0!	#DIV/0!	#DIV/0!	0	0	0	0	0	0	#DIV/0!	#DIV/0!	#DIV/0!	#DIV/0!	#DIV/0!	#DIV/0!	#DIV/0!	0
						#DIV/0!		#DIV/0!															#DIV/0!	#DIV/0!	#DIV/0!	#DIV/0!	#DIV/0!	#DIV/0!	#DIV/0!	#DIV/0!	#DIV/0!	#DIV/0!	#DIV/0!	#DIV/0!	#DIV/0!	0	0	0	0	0	0	#DIV/0!	#DIV/0!	#DIV/0!	#DIV/0!	#DIV/0!	#DIV/0!	#DIV/0!	0
						#DIV/0!		#DIV/0!															#DIV/0!	#DIV/0!	#DIV/0!	#DIV/0!	#DIV/0!	#DIV/0!	#DIV/0!	#DIV/0!	#DIV/0!	#DIV/0!	#DIV/0!	#DIV/0!	#DIV/0!	0	0	0	0	0	0	#DIV/0!	#DIV/0!	#DIV/0!	#DIV/0!	#DIV/0!	#DIV/0!	#DIV/0!	0
						#DIV/0!		#DIV/0!															#DIV/0!	#DIV/0!	#DIV/0!	#DIV/0!	#DIV/0!	#DIV/0!	#DIV/0!	#DIV/0!	#DIV/0!	#DIV/0!	#DIV/0!	#DIV/0!	#DIV/0!	0	0	0	0	0	0	#DIV/0!	#DIV/0!	#DIV/0!	#DIV/0!	#DIV/0!	#DIV/0!	#DIV/0!	0
						#DIV/0!		#DIV/0!															#DIV/0!	#DIV/0!	#DIV/0!	#DIV/0!	#DIV/0!	#DIV/0!	#DIV/0!	#DIV/0!	#DIV/0!	#DIV/0!	#DIV/0!	#DIV/0!	#DIV/0!	0	0	0	0	0	0	#DIV/0!	#DIV/0!	#DIV/0!	#DIV/0!	#DIV/0!	#DIV/0!	#DIV/0!	0
						#DIV/0!		#DIV/0!															#DIV/0!	#DIV/0!	#DIV/0!	#DIV/0!	#DIV/0!	#DIV/0!	#DIV/0!	#DIV/0!	#DIV/0!	#DIV/0!	#DIV/0!	#DIV/0!	#DIV/0!	0	0	0	0	0	0	#DIV/0!	#DIV/0!	#DIV/0!	#DIV/0!	#DIV/0!	#DIV/0!	#DIV/0!	0
						#DIV/0!		#DIV/0!															#DIV/0!	#DIV/0!	#DIV/0!	#DIV/0!	#DIV/0!	#DIV/0!	#DIV/0!	#DIV/0!	#DIV/0!	#DIV/0!	#DIV/0!	#DIV/0!	#DIV/0!	0	0	0	0	0	0	#DIV/0!	#DIV/0!	#DIV/0!	#DIV/0!	#DIV/0!	#DIV/0!	#DIV/0!	0
						#DIV/0!		#DIV/0!															#DIV/0!	#DIV/0!	#DIV/0!	#DIV/0!	#DIV/0!	#DIV/0!	#DIV/0!	#DIV/0!	#DIV/0!	#DIV/0!	#DIV/0!	#DIV/0!	#DIV/0!	0	0	0	0	0	0	#DIV/0!	#DIV/0!	#DIV/0!	#DIV/0!	#DIV/0!	#DIV/0!	#DIV/0!	0
						#DIV/0!		#DIV/0!															#DIV/0!	#DIV/0!	#DIV/0!	#DIV/0!	#DIV/0!	#DIV/0!	#DIV/0!	#DIV/0!	#DIV/0!	#DIV/0!	#DIV/0!	#DIV/0!	#DIV/0!	0	0	0	0	0	0	#DIV/0!	#DIV/0!	#DIV/0!	#DIV/0!	#DIV/0!	#DIV/0!	#DIV/0!	0
						#DIV/0!		#DIV/0!															#DIV/0!	#DIV/0!	#DIV/0!	#DIV/0!	#DIV/0!	#DIV/0!	#DIV/0!	#DIV/0!	#DIV/0!	#DIV/0!	#DIV/0!	#DIV/0!	#DIV/0!	0	0	0	0	0	0	#DIV/0!	#DIV/0!	#DIV/0!	#DIV/0!	#DIV/0!	#DIV/0!	#DIV/0!	0
						#DIV/0!		#DIV/0!															#DIV/0!	#DIV/0!	#DIV/0!	#DIV/0!	#DIV/0!	#DIV/0!	#DIV/0!	#DIV/0!	#DIV/0!	#DIV/0!	#DIV/0!	#DIV/0!	#DIV/0!	0	0	0	0	0	0	#DIV/0!	#DIV/0!	#DIV/0!	#DIV/0!	#DIV/0!	#DIV/0!	#DIV/0!	0
						#DIV/0!		#DIV/0!															#DIV/0!	#DIV/0!	#DIV/0!	#DIV/0!	#DIV/0!	#DIV/0!	#DIV/0!	#DIV/0!	#DIV/0!	#DIV/0!	#DIV/0!	#DIV/0!	#DIV/0!	0	0	0	0	0	0	#DIV/0!	#DIV/0!	#DIV/0!	#DIV/0!	#DIV/0!	#DIV/0!	#DIV/0!	0
						#DIV/0!		#DIV/0!															#DIV/0!	#DIV/0!	#DIV/0!	#DIV/0!	#DIV/0!	#DIV/0!	#DIV/0!	#DIV/0!	#DIV/0!	#DIV/0!	#DIV/0!	#DIV/0!	#DIV/0!	0	0	0	0	0	0	#DIV/0!	#DIV/0!	#DIV/0!	#DIV/0!	#DIV/0!	#DIV/0!	#DIV/0!	0
						#DIV/0!		#DIV/0!															#DIV/0!	#DIV/0!	#DIV/0!	#DIV/0!	#DIV/0!	#DIV/0!	#DIV/0!	#DIV/0!	#DIV/0!	#DIV/0!	#DIV/0!	#DIV/0!	#DIV/0!	0	0	0	0	0	0	#DIV/0!	#DIV/0!	#DIV/0!	#DIV/0!	#DIV/0!	#DIV/0!	#DIV/0!	0
						#DIV/0!		#DIV/0!															#DIV/0!	#DIV/0!	#DIV/0!	#DIV/0!	#DIV/0!	#DIV/0!	#DIV/0!	#DIV/0!	#DIV/0!	#DIV/0!	#DIV/0!	#DIV/0!	#DIV/0!	0	0	0	0	0	0	#DIV/0!	#DIV/0!	#DIV/0!	#DIV/0!	#DIV/0!	#DIV/0!	#DIV/0!	0
						#DIV/0!		#DIV/0!															#DIV/0!	#DIV/0!	#DIV/0!	#DIV/0!	#DIV/0!	#DIV/0!	#DIV/0!	#DIV/0!	#DIV/0!	#DIV/0!	#DIV/0!	#DIV/0!	#DIV/0!	0	0	0	0	0	0	#DIV/0!	#DIV/0!	#DIV/0!	#DIV/0!	#DIV/0!	#DIV/0!	#DIV/0!	0
						#DIV/0!		#DIV/0!															#DIV/0!	#DIV/0!	#DIV/0!	#DIV/0!	#DIV/0!	#DIV/0!	#DIV/0!	#DIV/0!	#DIV/0!	#DIV/0!	#DIV/0!	#DIV/0!	#DIV/0!	0	0	0	0	0	0	#DIV/0!	#DIV/0!	#DIV/0!	#DIV/0!	#DIV/0!	#DIV/0!	#DIV/0!	0
						#DIV/0!		#DIV/0!															#DIV/0!	#DIV/0!	#DIV/0!	#DIV/0!	#DIV/0!	#DIV/0!	#DIV/0!	#DIV/0!	#DIV/0!	#DIV/0!	#DIV/0!	#DIV/0!	#DIV/0!	0	0	0	0	0	0	#DIV/0!	#DIV/0!	#DIV/0!	#DIV/0!	#DIV/0!	#DIV/0!	#DIV/0!	0
						#DIV/0!		#DIV/0!															#DIV/0!	#DIV/0!	#DIV/0!	#DIV/0!	#DIV/0!	#DIV/0!	#DIV/0!	#DIV/0!	#DIV/0!	#DIV/0!	#DIV/0!	#DIV/0!	#DIV/0!	0	0	0	0	0	0	#DIV/0!	#DIV/0!	#DIV/0!	#DIV/0!	#DIV/0!	#DIV/0!	#DIV/0!	0
						#DIV/0!		#DIV/0!															#DIV/0!	#DIV/0!	#DIV/0!	#DIV/0!	#DIV/0!	#DIV/0!	#DIV/0!	#DIV/0!	#DIV/0!	#DIV/0!	#DIV/0!	#DIV/0!	#DIV/0!	0	0	0	0	0	0	#DIV/0!	#DIV/0!	#DIV/0!	#DIV/0!	#DIV/0!	#DIV/0!	#DIV/0!	0
						#DIV/0!		#DIV/0!															#DIV/0!	#DIV/0!	#DIV/0!	#DIV/0!	#DIV/0!	#DIV/0!	#DIV/0!	#DIV/0!	#DIV/0!	#DIV/0!	#DIV/0!	#DIV/0!	#DIV/0!	0	0	0	0	0	0	#DIV/0!	#DIV/0!	#DIV/0!	#DIV/0!	#DIV/0!	#DIV/0!	#DIV/0!	0
						#DIV/0!		#DIV/0!															#DIV/0!	#DIV/0!	#DIV/0!	#DIV/0!	#DIV/0!	#DIV/0!	#DIV/0!	#DIV/0!	#DIV/0!	#DIV/0!	#DIV/0!	#DIV/0!	#DIV/0!	0	0	0	0	0	0	#DIV/0!	#DIV/0!	#DIV/0!	#DIV/0!	#DIV/0!	#DIV/0!	#DIV/0!	0
						#DIV/0!		#DIV/0!															#DIV/0!	#DIV/0!	#DIV/0!	#DIV/0!	#DIV/0!	#DIV/0!	#DIV/0!	#DIV/0!	#DIV/0!	#DIV/0!	#DIV/0!	#DIV/0!	#DIV/0!	0	0	0	0	0	0	#DIV/0!	#DIV/0!	#DIV/0!	#DIV/0!	#DIV/0!	#DIV/0!	#DIV/0!	0
						#DIV/0!		#DIV/0!															#DIV/0!	#DIV/0!	#DIV/0!	#DIV/0!	#DIV/0!	#DIV/0!	#DIV/0!	#DIV/0!	#DIV/0!	#DIV/0!	#DIV/0!	#DIV/0!	#DIV/0!	0	0	0	0	0	0	#DIV/0!	#DIV/0!	#DIV/0!	#DIV/0!	#DIV/0!	#DIV/0!	#DIV/0!	0
						#DIV/0!		#DIV/0!															#DIV/0!	#DIV/0!	#DIV/0!	#DIV/0!	#DIV/0!	#DIV/0!	#DIV/0!	#DIV/0!	#DIV/0!	#DIV/0!	#DIV/0!	#DIV/0!	#DIV/0!	0	0	0	0	0	0	#DIV/0!	#DIV/0!	#DIV/0!	#DIV/0!	#DIV/0!	#DIV/0!	#DIV/0!	0
						#DIV/0!		#DIV/0!															#DIV/0!	#DIV/0!	#DIV/0!	#DIV/0!	#DIV/0!	#DIV/0!	#DIV/0!	#DIV/0!	#DIV/0!	#DIV/0!	#DIV/0!	#DIV/0!	#DIV/0!	0	0	0	0	0	0	#DIV/0!	#DIV/0!	#DIV/0!	#DIV/0!	#DIV/0!	#DIV/0!	#DIV/0!	0
						#DIV/0!		#DIV/0!															#DIV/0!	#DIV/0!	#DIV/0!	#DIV/0!	#DIV/0!	#DIV/0!	#DIV/0!	#DIV/0!	#DIV/0!	#DIV/0!	#DIV/0!	#DIV/0!	#DIV/0!	0	0	0	0	0	0	#DIV/0!	#DIV/0!	#DIV/0!	#DIV/0!	#DIV/0!	#DIV/0!	#DIV/0!	0
						#DIV/0!		#DIV/0!															#DIV/0!	#DIV/0!	#DIV/0!	#DIV/0!	#DIV/0!	#DIV/0!	#DIV/0!	#DIV/0!	#DIV/0!	#DIV/0!	#DIV/0!	#DIV/0!	#DIV/0!	0	0	0	0	0	0	#DIV/0!	#DIV/0!	#DIV/0!	#DIV/0!	#DIV/0!	#DIV/0!	#DIV/0!	0
						#DIV/0!		#DIV/0!															#DIV/0!	#DIV/0!	#DIV/0!	#DIV/0!	#DIV/0!	#DIV/0!	#DIV/0!	#DIV/0!	#DIV/0!	#DIV/0!	#DIV/0!	#DIV/0!	#DIV/0!	0	0	0	0	0	0	#DIV/0!	#DIV/0!	#DIV/0!	#DIV/0!	#DIV/0!	#DIV/0!	#DIV/0!	0
						#DIV/0!		#DIV/0!															#DIV/0!	#DIV/0!	#DIV/0!	#DIV/0!	#DIV/0!	#DIV/0!	#DIV/0!	#DIV/0!	#DIV/0!	#DIV/0!	#DIV/0!	#DIV/0!	#DIV/0!	0	0	0	0	0	0	#DIV/0!	#DIV/0!	#DIV/0!	#DIV/0!	#DIV/0!	#DIV/0!	#DIV/0!	0
						#DIV/0!		#DIV/0!															#DIV/0!	#DIV/0!	#DIV/0!	#DIV/0!	#DIV/0!	#DIV/0!	#DIV/0!	#DIV/0!	#DIV/0!	#DIV/0!	#DIV/0!	#DIV/0!	#DIV/0!	0	0	0	0	0	0	#DIV/0!	#DIV/0!	#DIV/0!	#DIV/0!	#DIV/0!	#DIV/0!	#DIV/0!	0
						#DIV/0!		#DIV/0!															#DIV/0!	#DIV/0!	#DIV/0!	#DIV/0!	#DIV/0!	#DIV/0!	#DIV/0!	#DIV/0!	#DIV/0!	#DIV/0!	#DIV/0!	#DIV/0!	#DIV/0!	0	0	0	0	0	0	#DIV/0!	#DIV/0!	#DIV/0!	#DIV/0!	#DIV/0!	#DIV/0!	#DIV/0!	0
						#DIV/0!		#DIV/0!															#DIV/0!	#DIV/0!	#DIV/0!	#DIV/0!	#DIV/0!	#DIV/0!	#DIV/0!	#DIV/0!	#DIV/0!	#DIV/0!	#DIV/0!	#DIV/0!	#DIV/0!	0	0	0	0	0	0	#DIV/0!	#DIV/0!	#DIV/0!	#DIV/0!	#DIV/0!	#DIV/0!	#DIV/0!	0
						#DIV/0!		#DIV/0!															#DIV/0!	#DIV/0!	#DIV/0!	#DIV/0!	#DIV/0!	#DIV/0!	#DIV/0!	#DIV/0!	#DIV/0!	#DIV/0!	#DIV/0!	#DIV/0!	#DIV/0!	0	0	0	0	0	0	#DIV/0!	#DIV/0!	#DIV/0!	#DIV/0!	#DIV/0!	#DIV/0!	#DIV/0!	0
						#DIV/0!		#DIV/0!															#DIV/0!	#DIV/0!	#DIV/0!	#DIV/0!	#DIV/0!	#DIV/0!	#DIV/0!	#DIV/0!	#DIV/0!	#DIV/0!	#DIV/0!	#DIV/0!	#DIV/0!	0	0	0	0	0	0	#DIV/0!	#DIV/0!	#DIV/0!	#DIV/0!	#DIV/0!	#DIV/0!	#DIV/0!	0
						#DIV/0!		#DIV/0!															#DIV/0!	#DIV/0!	#DIV/0!	#DIV/0!	#DIV/0!	#DIV/0!	#DIV/0!	#DIV/0!	#DIV/0!	#DIV/0!	#DIV/0!	#DIV/0!	#DIV/0!	0	0	0	0	0	0	#DIV/0!	#DIV/0!	#DIV/0!	#DIV/0!	#DIV/0!	#DIV/0!	#DIV/0!	0
						#DIV/0!		#DIV/0!															#DIV/0!	#DIV/0!	#DIV/0!	#DIV/0!	#DIV/0!	#DIV/0!	#DIV/0!	#DIV/0!	#DIV/0!	#DIV/0!	#DIV/0!	#DIV/0!	#DIV/0!	0	0	0	0	0	0	#DIV/0!	#DIV/0!	#DIV/0!	#DIV/0!	#DIV/0!	#DIV/0!	#DIV/0!	0
						#DIV/0!		#DIV/0!															#DIV/0!	#DIV/0!	#DIV/0!	#DIV/0!	#DIV/0!	#DIV/0!	#DIV/0!	#DIV/0!	#DIV/0!	#DIV/0!	#DIV/0!	#DIV/0!	#DIV/0!	0	0	0	0	0	0	#DIV/0!	#DIV/0!	#DIV/0!	#DIV/0!	#DIV/0!	#DIV/0!	#DIV/0!	0
						#DIV/0!		#DIV/0!															#DIV/0!	#DIV/0!	#DIV/0!	#DIV/0!	#DIV/0!	#DIV/0!	#DIV/0!	#DIV/0!	#DIV/0!	#DIV/0!	#DIV/0!	#DIV/0!	#DIV/0!	0	0	0	0	0	0	#DIV/0!	#DIV/0!	#DIV/0!	#DIV/0!	#DIV/0!	#DIV/0!	#DIV/0!	0
						#DIV/0!		#DIV/0!															#DIV/0!	#DIV/0!	#DIV/0!	#DIV/0!	#DIV/0!	#DIV/0!	#DIV/0!	#DIV/0!	#DIV/0!	#DIV/0!	#DIV/0!	#DIV/0!	#DIV/0!	0	0	0	0	0	0	#DIV/0!	#DIV/0!	#DIV/0!	#DIV/0!	#DIV/0!	#DIV/0!	#DIV/0!	0
						#DIV/0!		#DIV/0!															#DIV/0!	#DIV/0!	#DIV/0!	#DIV/0!	#DIV/0!	#DIV/0!	#DIV/0!	#DIV/0!	#DIV/0!	#DIV/0!	#DIV/0!	#DIV/0!	#DIV/0!	0	0	0	0	0	0	#DIV/0!	#DIV/0!	#DIV/0!	#DIV/0!	#DIV/0!	#DIV/0!	#DIV/0!	0
						#DIV/0!		#DIV/0!															#DIV/0!	#DIV/0!	#DIV/0!	#DIV/0!	#DIV/0!	#DIV/0!	#DIV/0!	#DIV/0!	#DIV/0!	#DIV/0!	#DIV/0!	#DIV/0!	#DIV/0!	0	0	0	0	0	0	#DIV/0!	#DIV/0!	#DIV/0!	#DIV/0!	#DIV/0!	#DIV/0!	#DIV/0!	0
						#DIV/0!		#DIV/0!															#DIV/0!	#DIV/0!	#DIV/0!	#DIV/0!	#DIV/0!	#DIV/0!	#DIV/0!	#DIV/0!	#DIV/0!	#DIV/0!	#DIV/0!	#DIV/0!	#DIV/0!	0	0	0	0	0	0	#DIV/0!	#DIV/0!	#DIV/0!	#DIV/0!	#DIV/0!	#DIV/0!	#DIV/0!	0
						#DIV/0!		#DIV/0!															#DIV/0!	#DIV/0!	#DIV/0!	#DIV/0!	#DIV/0!	#DIV/0!	#DIV/0!	#DIV/0!	#DIV/0!	#DIV/0!	#DIV/0!	#DIV/0!	#DIV/0!	0	0	0	0	0	0	#DIV/0!	#DIV/0!	#DIV/0!	#DIV/0!	#DIV/0!	#DIV/0!	#DIV/0!	0
						#DIV/0!		#DIV/0!															#DIV/0!	#DIV/0!	#DIV/0!	#DIV/0!	#DIV/0!	#DIV/0!	#DIV/0!	#DIV/0!	#DIV/0!	#DIV/0!	#DIV/0!	#DIV/0!	#DIV/0!	0	0	0	0	0	0	#DIV/0!	#DIV/0!	#DIV/0!	#DIV/0!	#DIV/0!	#DIV/0!	#DIV/0!	0
						#DIV/0!		#DIV/0!															#DIV/0!	#DIV/0!	#DIV/0!	#DIV/0!	#DIV/0!	#DIV/0!	#DIV/0!	#DIV/0!	#DIV/0!	#DIV/0!	#DIV/0!	#DIV/0!	#DIV/0!	0	0	0	0	0	0	#DIV/0!	#DIV/0!	#DIV/0!	#DIV/0!	#DIV/0!	#DIV/0!	#DIV/0!	0
						#DIV/0!		#DIV/0!															#DIV/0!	#DIV/0!	#DIV/0!	#DIV/0!	#DIV/0!	#DIV/0!	#DIV/0!	#DIV/0!	#DIV/0!	#DIV/0!	#DIV/0!	#DIV/0!	#DIV/0!	0	0	0	0	0	0	#DIV/0!	#DIV/0!	#DIV/0!	#DIV/0!	#DIV/0!	#DIV/0!	#DIV/0!	0
						#DIV/0!		#DIV/0!															#DIV/0!	#DIV/0!	#DIV/0!	#DIV/0!	#DIV/0!	#DIV/0!	#DIV/0!	#DIV/0!	#DIV/0!	#DIV/0!	#DIV/0!	#DIV/0!	#DIV/0!	0	0	0	0	0	0	#DIV/0!	#DIV/0!	#DIV/0!	#DIV/0!	#DIV/0!	#DIV/0!	#DIV/0!	0
						#DIV/0!		#DIV/0!															#DIV/0!	#DIV/0!	#DIV/0!	#DIV/0!	#DIV/0!	#DIV/0!	#DIV/0!	#DIV/0!	#DIV/0!	#DIV/0!	#DIV/0!	#DIV/0!	#DIV/0!	0	0	0	0	0	0	#DIV/0!	#DIV/0!	#DIV/0!	#DIV/0!	#DIV/0!	#DIV/0!	#DIV/0!	0
						#DIV/0!		#DIV/0!															#DIV/0!	#DIV/0!	#DIV/0!	#DIV/0!	#DIV/0!	#DIV/0!	#DIV/0!	#DIV/0!	#DIV/0!	#DIV/0!	#DIV/0!	#DIV/0!	#DIV/0!	0	0	0	0	0	0	#DIV/0!	#DIV/0!	#DIV/0!	#DIV/0!	#DIV/0!	#DIV/0!	#DIV/0!	0
						#DIV/0!		#DIV/0!															#DIV/0!	#DIV/0!	#DIV/0!	#DIV/0!	#DIV/0!	#DIV/0!	#DIV/0!	#DIV/0!	#DIV/0!	#DIV/0!	#DIV/0!	#DIV/0!	#DIV/0!	0	0	0	0	0	0	#DIV/0!	#DIV/0!	#DIV/0!	#DIV/0!	#DIV/0!	#DIV/0!	#DIV/0!	0
						#DIV/0!		#DIV/0!															#DIV/0!	#DIV/0!	#DIV/0!	#DIV/0!	#DIV/0!	#DIV/0!	#DIV/0!	#DIV/0!	#DIV/0!	#DIV/0!	#DIV/0!	#DIV/0!	#DIV/0!	0	0	0	0	0	0	#DIV/0!	#DIV/0!	#DIV/0!	#DIV/0!	#DIV/0!	#DIV/0!	#DIV/0!	0
						#DIV/0!		#DIV/0!															#DIV/0!	#DIV/0!	#DIV/0!	#DIV/0!	#DIV/0!	#DIV/0!	#DIV/0!	#DIV/0!	#DIV/0!	#DIV/0!	#DIV/0!	#DIV/0!	#DIV/0!	0	0	0	0	0	0	#DIV/0!	#DIV/0!	#DIV/0!	#DIV/0!	#DIV/0!	#DIV/0!	#DIV/0!	0
						#DIV/0!		#DIV/0!															#DIV/0!	#DIV/0!	#DIV/0!	#DIV/0!	#DIV/0!	#DIV/0!	#DIV/0!	#DIV/0!	#DIV/0!	#DIV/0!	#DIV/0!	#DIV/0!	#DIV/0!	0	0	0	0	0	0	#DIV/0!	#DIV/0!	#DIV/0!	#DIV/0!	#DIV/0!	#DIV/0!	#DIV/0!	0
						#DIV/0!		#DIV/0!															#DIV/0!	#DIV/0!	#DIV/0!	#DIV/0!	#DIV/0!	#DIV/0!	#DIV/0!	#DIV/0!	#DIV/0!	#DIV/0!	#DIV/0!	#DIV/0!	#DIV/0!	0	0	0	0	0	0	#DIV/0!	#DIV/0!	#DIV/0!	#DIV/0!	#DIV/0!	#DIV/0!	#DIV/0!	0
						#DIV/0!		#DIV/0!															#DIV/0!	#DIV/0!	#DIV/0!	#DIV/0!	#DIV/0!	#DIV/0!	#DIV/0!	#DIV/0!	#DIV/0!	#DIV/0!	#DIV/0!	#DIV/0!	#DIV/0!	0	0	0	0	0	0	#DIV/0!	#DIV/0!	#DIV/0!	#DIV/0!	#DIV/0!	#DIV/0!	#DIV/0!	0
						#DIV/0!		#DIV/0!															#DIV/0!	#DIV/0!	#DIV/0!	#DIV/0!	#DIV/0!	#DIV/0!	#DIV/0!	#DIV/0!	#DIV/0!	#DIV/0!	#DIV/0!	#DIV/0!	#DIV/0!	0	0	0	0	0	0	#DIV/0!	#DIV/0!	#DIV/0!	#DIV/0!	#DIV/0!	#DIV/0!	#DIV/0!	0
						#DIV/0!		#DIV/0!															#DIV/0!	#DIV/0!	#DIV/0!	#DIV/0!	#DIV/0!	#DIV/0!	#DIV/0!	#DIV/0!	#DIV/0!	#DIV/0!	#DIV/0!	#DIV/0!	#DIV/0!	0	0	0	0	0	0	#DIV/0!	#DIV/0!	#DIV/0!	#DIV/0!	#DIV/0!	#DIV/0!	#DIV/0!	0
						#DIV/0!		#DIV/0!															#DIV/0!	#DIV/0!	#DIV/0!	#DIV/0!	#DIV/0!	#DIV/0!	#DIV/0!	#DIV/0!	#DIV/0!	#DIV/0!	#DIV/0!	#DIV/0!	#DIV/0!	0	0	0	0	0	0	#DIV/0!	#DIV/0!	#DIV/0!	#DIV/0!	#DIV/0!	#DIV/0!	#DIV/0!	0
						#DIV/0!		#DIV/0!															#DIV/0!	#DIV/0!	#DIV/0!	#DIV/0!	#DIV/0!	#DIV/0!	#DIV/0!	#DIV/0!	#DIV/0!	#DIV/0!	#DIV/0!	#DIV/0!	#DIV/0!	0	0	0	0	0	0	#DIV/0!	#DIV/0!	#DIV/0!	#DIV/0!	#DIV/0!	#DIV/0!	#DIV/0!	0
						#DIV/0!		#DIV/0!															#DIV/0!	#DIV/0!	#DIV/0!	#DIV/0!	#DIV/0!	#DIV/0!	#DIV/0!	#DIV/0!	#DIV/0!	#DIV/0!	#DIV/0!	#DIV/0!	#DIV/0!	0	0	0	0	0	0	#DIV/0!	#DIV/0!	#DIV/0!	#DIV/0!	#DIV/0!	#DIV/0!	#DIV/0!	0
						#DIV/0!		#DIV/0!															#DIV/0!	#DIV/0!	#DIV/0!	#DIV/0!	#DIV/0!	#DIV/0!	#DIV/0!	#DIV/0!	#DIV/0!	#DIV/0!	#DIV/0!	#DIV/0!	#DIV/0!	0	0	0	0	0	0	#DIV/0!	#DIV/0!	#DIV/0!	#DIV/0!	#DIV/0!	#DIV/0!	#DIV/0!	0
						#DIV/0!		#DIV/0!															#DIV/0!	#DIV/0!	#DIV/0!	#DIV/0!	#DIV/0!	#DIV/0!	#DIV/0!	#DIV/0!	#DIV/0!	#DIV/0!	#DIV/0!	#DIV/0!	#DIV/0!	0	0	0	0	0	0	#DIV/0!	#DIV/0!	#DIV/0!	#DIV/0!	#DIV/0!	#DIV/0!	#DIV/0!	0
						#DIV/0!		#DIV/0!															#DIV/0!	#DIV/0!	#DIV/0!	#DIV/0!	#DIV/0!	#DIV/0!	#DIV/0!	#DIV/0!	#DIV/0!	#DIV/0!	#DIV/0!	#DIV/0!	#DIV/0!	0	0	0	0	0	0	#DIV/0!	#DIV/0!	#DIV/0!	#DIV/0!	#DIV/0!	#DIV/0!	#DIV/0!	0
						#DIV/0!		#DIV/0!															#DIV/0!	#DIV/0!	#DIV/0!	#DIV/0!	#DIV/0!	#DIV/0!	#DIV/0!	#DIV/0!	#DIV/0!	#DIV/0!	#DIV/0!	#DIV/0!	#DIV/0!	0	0	0	0	0	0	#DIV/0!	#DIV/0!	#DIV/0!	#DIV/0!	#DIV/0!	#DIV/0!	#DIV/0!	0
						#DIV/0!		#DIV/0!															#DIV/0!	#DIV/0!	#DIV/0!	#DIV/0!	#DIV/0!	#DIV/0!	#DIV/0!	#DIV/0!	#DIV/0!	#DIV/0!	#DIV/0!	#DIV/0!	#DIV/0!	0	0	0	0	0	0	#DIV/0!	#DIV/0!	#DIV/0!	#DIV/0!	#DIV/0!	#DIV/0!	#DIV/0!	0
						#DIV/0!		#DIV/0!															#DIV/0!	#DIV/0!	#DIV/0!	#DIV/0!	#DIV/0!	#DIV/0!	#DIV/0!	#DIV/0!	#DIV/0!	#DIV/0!	#DIV/0!	#DIV/0!	#DIV/0!	0	0	0	0	0	0	#DIV/0!	#DIV/0!	#DIV/0!	#DIV/0!	#DIV/0!	#DIV/0!	#DIV/0!	0
						#DIV/0!		#DIV/0!															#DIV/0!	#DIV/0!	#DIV/0!	#DIV/0!	#DIV/0!	#DIV/0!	#DIV/0!	#DIV/0!	#DIV/0!	#DIV/0!	#DIV/0!	#DIV/0!	#DIV/0!	0	0	0	0	0	0	#DIV/0!	#DIV/0!	#DIV/0!	#DIV/0!	#DIV/0!	#DIV/0!	#DIV/0!	0
						#DIV/0!		#DIV/0!															#DIV/0!	#DIV/0!	#DIV/0!	#DIV/0!	#DIV/0!	#DIV/0!	#DIV/0!	#DIV/0!	#DIV/0!	#DIV/0!	#DIV/0!	#DIV/0!	#DIV/0!	0	0	0	0	0	0	#DIV/0!	#DIV/0!	#DIV/0!	#DIV/0!	#DIV/0!	#DIV/0!	#DIV/0!	0
						#DIV/0!		#DIV/0!															#DIV/0!	#DIV/0!	#DIV/0!	#DIV/0!	#DIV/0!	#DIV/0!	#DIV/0!	#DIV/0!	#DIV/0!	#DIV/0!	#DIV/0!	#DIV/0!	#DIV/0!	0	0	0	0	0	0	#DIV/0!	#DIV/0!	#DIV/0!	#DIV/0!	#DIV/0!	#DIV/0!	#DIV/0!	0
						#DIV/0!		#DIV/0!															#DIV/0!	#DIV/0!	#DIV/0!	#DIV/0!	#DIV/0!	#DIV/0!	#DIV/0!	#DIV/0!	#DIV/0!	#DIV/0!	#DIV/0!	#DIV/0!	#DIV/0!	0	0	0	0	0	0	#DIV/0!	#DIV/0!	#DIV/0!	#DIV/0!	#DIV/0!	#DIV/0!	#DIV/0!	0
						#DIV/0!		#DIV/0!															#DIV/0!	#DIV/0!	#DIV/0!	#DIV/0!	#DIV/0!	#DIV/0!	#DIV/0!	#DIV/0!	#DIV/0!	#DIV/0!	#DIV/0!	#DIV/0!	#DIV/0!	0	0	0	0	0	0	#DIV/0!	#DIV/0!	#DIV/0!	#DIV/0!	#DIV/0!	#DIV/0!	#DIV/0!	0
						#DIV/0!		#DIV/0!															#DIV/0!	#DIV/0!	#DIV/0!	#DIV/0!	#DIV/0!	#DIV/0!	#DIV/0!	#DIV/0!	#DIV/0!	#DIV/0!	#DIV/0!	#DIV/0!	#DIV/0!	0	0	0	0	0	0	#DIV/0!	#DIV/0!	#DIV/0!	#DIV/0!	#DIV/0!	#DIV/0!	#DIV/0!	0
						#DIV/0!		#DIV/0!															#DIV/0!	#DIV/0!	#DIV/0!	#DIV/0!	#DIV/0!	#DIV/0!	#DIV/0!	#DIV/0!	#DIV/0!	#DIV/0!	#DIV/0!	#DIV/0!	#DIV/0!	0	0	0	0	0	0	#DIV/0!	#DIV/0!	#DIV/0!	#DIV/0!	#DIV/0!	#DIV/0!	#DIV/0!	0
						#DIV/0!		#DIV/0!															#DIV/0!	#DIV/0!	#DIV/0!	#DIV/0!	#DIV/0!	#DIV/0!	#DIV/0!	#DIV/0!	#DIV/0!	#DIV/0!	#DIV/0!	#DIV/0!	#DIV/0!	0	0	0	0	0	0	#DIV/0!	#DIV/0!	#DIV/0!	#DIV/0!	#DIV/0!	#DIV/0!	#DIV/0!	0
						#DIV/0!		#DIV/0!															#DIV/0!	#DIV/0!	#DIV/0!	#DIV/0!	#DIV/0!	#DIV/0!	#DIV/0!	#DIV/0!	#DIV/0!	#DIV/0!	#DIV/0!	#DIV/0!	#DIV/0!	0	0	0	0	0	0	#DIV/0!	#DIV/0!	#DIV/0!	#DIV/0!	#DIV/0!	#DIV/0!	#DIV/0!	0
						#DIV/0!		#DIV/0!															#DIV/0!	#DIV/0!	#DIV/0!	#DIV/0!	#DIV/0!	#DIV/0!	#DIV/0!	#DIV/0!	#DIV/0!	#DIV/0!	#DIV/0!	#DIV/0!	#DIV/0!	0	0	0	0	0	0	#DIV/0!	#DIV/0!	#DIV/0!	#DIV/0!	#DIV/0!	#DIV/0!	#DIV/0!	0
						#DIV/0!		#DIV/0!															#DIV/0!	#DIV/0!	#DIV/0!	#DIV/0!	#DIV/0!	#DIV/0!	#DIV/0!	#DIV/0!	#DIV/0!	#DIV/0!	#DIV/0!	#DIV/0!	#DIV/0!	0	0	0	0	0	0	#DIV/0!	#DIV/0!	#DIV/0!	#DIV/0!	#DIV/0!	#DIV/0!	#DIV/0!	0
						#DIV/0!		#DIV/0!															#DIV/0!	#DIV/0!	#DIV/0!	#DIV/0!	#DIV/0!	#DIV/0!	#DIV/0!	#DIV/0!	#DIV/0!	#DIV/0!	#DIV/0!	#DIV/0!	#DIV/0!	0	0	0	0	0	0	#DIV/0!	#DIV/0!	#DIV/0!	#DIV/0!	#DIV/0!	#DIV/0!	#DIV/0!	0
						#DIV/0!		#DIV/0!															#DIV/0!	#DIV/0!	#DIV/0!	#DIV/0!	#DIV/0!	#DIV/0!	#DIV/0!	#DIV/0!	#DIV/0!	#DIV/0!	#DIV/0!	#DIV/0!	#DIV/0!	0	0	0	0	0	0	#DIV/0!	#DIV/0!	#DIV/0!	#DIV/0!	#DIV/0!	#DIV/0!	#DIV/0!	0
						#DIV/0!		#DIV/0!															#DIV/0!	#DIV/0!	#DIV/0!	#DIV/0!	#DIV/0!	#DIV/0!	#DIV/0!	#DIV/0!	#DIV/0!	#DIV/0!	#DIV/0!	#DIV/0!	#DIV/0!	0	0	0	0	0	0	#DIV/0!	#DIV/0!	#DIV/0!	#DIV/0!	#DIV/0!	#DIV/0!	#DIV/0!	0
						#DIV/0!		#DIV/0!															#DIV/0!	#DIV/0!	#DIV/0!	#DIV/0!	#DIV/0!	#DIV/0!	#DIV/0!	#DIV/0!	#DIV/0!	#DIV/0!	#DIV/0!	#DIV/0!	#DIV/0!	0	0	0	0	0	0	#DIV/0!	#DIV/0!	#DIV/0!	#DIV/0!	#DIV/0!	#DIV/0!	#DIV/0!	0
						#DIV/0!		#DIV/0!															#DIV/0!	#DIV/0!	#DIV/0!	#DIV/0!	#DIV/0!	#DIV/0!	#DIV/0!	#DIV/0!	#DIV/0!	#DIV/0!	#DIV/0!	#DIV/0!	#DIV/0!	0	0	0	0	0	0	#DIV/0!	#DIV/0!	#DIV/0!	#DIV/0!	#DIV/0!	#DIV/0!	#DIV/0!	0
						#DIV/0!		#DIV/0!															#DIV/0!	#DIV/0!	#DIV/0!	#DIV/0!	#DIV/0!	#DIV/0!	#DIV/0!	#DIV/0!	#DIV/0!	#DIV/0!	#DIV/0!	#DIV/0!	#DIV/0!	0	0	0	0	0	0	#DIV/0!	#DIV/0!	#DIV/0!	#DIV/0!	#DIV/0!	#DIV/0!	#DIV/0!	0
						#DIV/0!		#DIV/0!															#DIV/0!	#DIV/0!	#DIV/0!	#DIV/0!	#DIV/0!	#DIV/0!	#DIV/0!	#DIV/0!	#DIV/0!	#DIV/0!	#DIV/0!	#DIV/0!	#DIV/0!	0	0	0	0	0	0	#DIV/0!	#DIV/0!	#DIV/0!	#DIV/0!	#DIV/0!	#DIV/0!	#DIV/0!	0
						#DIV/0!		#DIV/0!															#DIV/0!	#DIV/0!	#DIV/0!	#DIV/0!	#DIV/0!	#DIV/0!	#DIV/0!	#DIV/0!	#DIV/0!	#DIV/0!	#DIV/0!	#DIV/0!	#DIV/0!	0	0	0	0	0	0	#DIV/0!	#DIV/0!	#DIV/0!	#DIV/0!	#DIV/0!	#DIV/0!	#DIV/0!	0
						#DIV/0!		#DIV/0!															#DIV/0!	#DIV/0!	#DIV/0!	#DIV/0!	#DIV/0!	#DIV/0!	#DIV/0!	#DIV/0!	#DIV/0!	#DIV/0!	#DIV/0!	#DIV/0!	#DIV/0!	0	0	0	0	0	0	#DIV/0!	#DIV/0!	#DIV/0!	#DIV/0!	#DIV/0!	#DIV/0!	#DIV/0!	0
						#DIV/0!		#DIV/0!															#DIV/0!	#DIV/0!	#DIV/0!	#DIV/0!	#DIV/0!	#DIV/0!	#DIV/0!	#DIV/0!	#DIV/0!	#DIV/0!	#DIV/0!	#DIV/0!	#DIV/0!	0	0	0	0	0	0	#DIV/0!	#DIV/0!	#DIV/0!	#DIV/0!	#DIV/0!	#DIV/0!	#DIV/0!	0
						#DIV/0!		#DIV/0!															#DIV/0!	#DIV/0!	#DIV/0!	#DIV/0!	#DIV/0!	#DIV/0!	#DIV/0!	#DIV/0!	#DIV/0!	#DIV/0!	#DIV/0!	#DIV/0!	#DIV/0!	0	0	0	0	0	0	#DIV/0!	#DIV/0!	#DIV/0!	#DIV/0!	#DIV/0!	#DIV/0!	#DIV/0!	0
						#DIV/0!		#DIV/0!															#DIV/0!	#DIV/0!	#DIV/0!	#DIV/0!	#DIV/0!	#DIV/0!	#DIV/0!	#DIV/0!	#DIV/0!	#DIV/0!	#DIV/0!	#DIV/0!	#DIV/0!	0	0	0	0	0	0	#DIV/0!	#DIV/0!	#DIV/0!	#DIV/0!	#DIV/0!	#DIV/0!	#DIV/0!	0
						#DIV/0!		#DIV/0!															#DIV/0!	#DIV/0!	#DIV/0!	#DIV/0!	#DIV/0!	#DIV/0!	#DIV/0!	#DIV/0!	#DIV/0!	#DIV/0!	#DIV/0!	#DIV/0!	#DIV/0!	0	0	0	0	0	0	#DIV/0!	#DIV/0!	#DIV/0!	#DIV/0!	#DIV/0!	#DIV/0!	#DIV/0!	0
						#DIV/0!		#DIV/0!															#DIV/0!	#DIV/0!	#DIV/0!	#DIV/0!	#DIV/0!	#DIV/0!	#DIV/0!	#DIV/0!	#DIV/0!	#DIV/0!	#DIV/0!	#DIV/0!	#DIV/0!	0	0	0	0	0	0	#DIV/0!	#DIV/0!	#DIV/0!	#DIV/0!	#DIV/0!	#DIV/0!	#DIV/0!	0
						#DIV/0!		#DIV/0!															#DIV/0!	#DIV/0!	#DIV/0!	#DIV/0!	#DIV/0!	#DIV/0!	#DIV/0!	#DIV/0!	#DIV/0!	#DIV/0!	#DIV/0!	#DIV/0!	#DIV/0!	0	0	0	0	0	0	#DIV/0!	#DIV/0!	#DIV/0!	#DIV/0!	#DIV/0!	#DIV/0!	#DIV/0!	0
						#DIV/0!		#DIV/0!															#DIV/0!	#DIV/0!	#DIV/0!	#DIV/0!	#DIV/0!	#DIV/0!	#DIV/0!	#DIV/0!	#DIV/0!	#DIV/0!	#DIV/0!	#DIV/0!	#DIV/0!	0	0	0	0	0	0	#DIV/0!	#DIV/0!	#DIV/0!	#DIV/0!	#DIV/0!	#DIV/0!	#DIV/0!	0
						#DIV/0!		#DIV/0!															#DIV/0!	#DIV/0!	#DIV/0!	#DIV/0!	#DIV/0!	#DIV/0!	#DIV/0!	#DIV/0!	#DIV/0!	#DIV/0!	#DIV/0!	#DIV/0!	#DIV/0!	0	0	0	0	0	0	#DIV/0!	#DIV/0!	#DIV/0!	#DIV/0!	#DIV/0!	#DIV/0!	#DIV/0!	0
						#DIV/0!		#DIV/0!															#DIV/0!	#DIV/0!	#DIV/0!	#DIV/0!	#DIV/0!	#DIV/0!	#DIV/0!	#DIV/0!	#DIV/0!	#DIV/0!	#DIV/0!	#DIV/0!	#DIV/0!	0	0	0	0	0	0	#DIV/0!	#DIV/0!	#DIV/0!	#DIV/0!	#DIV/0!	#DIV/0!	#DIV/0!	0
						#DIV/0!		#DIV/0!															#DIV/0!	#DIV/0!	#DIV/0!	#DIV/0!	#DIV/0!	#DIV/0!	#DIV/0!	#DIV/0!	#DIV/0!	#DIV/0!	#DIV/0!	#DIV/0!	#DIV/0!	0	0	0	0	0	0	#DIV/0!	#DIV/0!	#DIV/0!	#DIV/0!	#DIV/0!	#DIV/0!	#DIV/0!	0
						#DIV/0!		#DIV/0!															#DIV/0!	#DIV/0!	#DIV/0!	#DIV/0!	#DIV/0!	#DIV/0!	#DIV/0!	#DIV/0!	#DIV/0!	#DIV/0!	#DIV/0!	#DIV/0!	#DIV/0!	0	0	0	0	0	0	#DIV/0!	#DIV/0!	#DIV/0!	#DIV/0!	#DIV/0!	#DIV/0!	#DIV/0!	0
						#DIV/0!		#DIV/0!															#DIV/0!	#DIV/0!	#DIV/0!	#DIV/0!	#DIV/0!	#DIV/0!	#DIV/0!	#DIV/0!	#DIV/0!	#DIV/0!	#DIV/0!	#DIV/0!	#DIV/0!	0	0	0	0	0	0	#DIV/0!	#DIV/0!	#DIV/0!	#DIV/0!	#DIV/0!	#DIV/0!	#DIV/0!	0
						#DIV/0!		#DIV/0!															#DIV/0!	#DIV/0!	#DIV/0!	#DIV/0!	#DIV/0!	#DIV/0!	#DIV/0!	#DIV/0!	#DIV/0!	#DIV/0!	#DIV/0!	#DIV/0!	#DIV/0!	0	0	0	0	0	0	#DIV/0!	#DIV/0!	#DIV/0!	#DIV/0!	#DIV/0!	#DIV/0!	#DIV/0!	0
						#DIV/0!		#DIV/0!															#DIV/0!	#DIV/0!	#DIV/0!	#DIV/0!	#DIV/0!	#DIV/0!	#DIV/0!	#DIV/0!	#DIV/0!	#DIV/0!	#DIV/0!	#DIV/0!	#DIV/0!	0	0	0	0	0	0	#DIV/0!	#DIV/0!	#DIV/0!	#DIV/0!	#DIV/0!	#DIV/0!	#DIV/0!	0
						#DIV/0!		#DIV/0!															#DIV/0!	#DIV/0!	#DIV/0!	#DIV/0!	#DIV/0!	#DIV/0!	#DIV/0!	#DIV/0!	#DIV/0!	#DIV/0!	#DIV/0!	#DIV/0!	#DIV/0!	0	0	0	0	0	0	#DIV/0!	#DIV/0!	#DIV/0!	#DIV/0!	#DIV/0!	#DIV/0!	#DIV/0!	0
						#DIV/0!		#DIV/0!															#DIV/0!	#DIV/0!	#DIV/0!	#DIV/0!	#DIV/0!	#DIV/0!	#DIV/0!	#DIV/0!	#DIV/0!	#DIV/0!	#DIV/0!	#DIV/0!	#DIV/0!	0	0	0	0	0	0	#DIV/0!	#DIV/0!	#DIV/0!	#DIV/0!	#DIV/0!	#DIV/0!	#DIV/0!	0
						#DIV/0!		#DIV/0!															#DIV/0!	#DIV/0!	#DIV/0!	#DIV/0!	#DIV/0!	#DIV/0!	#DIV/0!	#DIV/0!	#DIV/0!	#DIV/0!	#DIV/0!	#DIV/0!	#DIV/0!	0	0	0	0	0	0	#DIV/0!	#DIV/0!	#DIV/0!	#DIV/0!	#DIV/0!	#DIV/0!	#DIV/0!	0
						#DIV/0!		#DIV/0!															#DIV/0!	#DIV/0!	#DIV/0!	#DIV/0!	#DIV/0!	#DIV/0!	#DIV/0!	#DIV/0!	#DIV/0!	#DIV/0!	#DIV/0!	#DIV/0!	#DIV/0!	0	0	0	0	0	0	#DIV/0!	#DIV/0!	#DIV/0!	#DIV/0!	#DIV/0!	#DIV/0!	#DIV/0!	0
						#DIV/0!		#DIV/0!															#DIV/0!	#DIV/0!	#DIV/0!	#DIV/0!	#DIV/0!	#DIV/0!	#DIV/0!	#DIV/0!	#DIV/0!	#DIV/0!	#DIV/0!	#DIV/0!	#DIV/0!	0	0	0	0	0	0	#DIV/0!	#DIV/0!	#DIV/0!	#DIV/0!	#DIV/0!	#DIV/0!	#DIV/0!	0
						#DIV/0!		#DIV/0!															#DIV/0!	#DIV/0!	#DIV/0!	#DIV/0!	#DIV/0!	#DIV/0!	#DIV/0!	#DIV/0!	#DIV/0!	#DIV/0!	#DIV/0!	#DIV/0!	#DIV/0!	0	0	0	0	0	0	#DIV/0!	#DIV/0!	#DIV/0!	#DIV/0!	#DIV/0!	#DIV/0!	#DIV/0!	0
						#DIV/0!		#DIV/0!															#DIV/0!	#DIV/0!	#DIV/0!	#DIV/0!	#DIV/0!	#DIV/0!	#DIV/0!	#DIV/0!	#DIV/0!	#DIV/0!	#DIV/0!	#DIV/0!	#DIV/0!	0	0	0	0	0	0	#DIV/0!	#DIV/0!	#DIV/0!	#DIV/0!	#DIV/0!	#DIV/0!	#DIV/0!	0
						#DIV/0!		#DIV/0!															#DIV/0!	#DIV/0!	#DIV/0!	#DIV/0!	#DIV/0!	#DIV/0!	#DIV/0!	#DIV/0!	#DIV/0!	#DIV/0!	#DIV/0!	#DIV/0!	#DIV/0!	0	0	0	0	0	0	#DIV/0!	#DIV/0!	#DIV/0!	#DIV/0!	#DIV/0!	#DIV/0!	#DIV/0!	0
						#DIV/0!		#DIV/0!															#DIV/0!	#DIV/0!	#DIV/0!	#DIV/0!	#DIV/0!	#DIV/0!	#DIV/0!	#DIV/0!	#DIV/0!	#DIV/0!	#DIV/0!	#DIV/0!	#DIV/0!	0	0	0	0	0	0	#DIV/0!	#DIV/0!	#DIV/0!	#DIV/0!	#DIV/0!	#DIV/0!	#DIV/0!	0
						#DIV/0!		#DIV/0!															#DIV/0!	#DIV/0!	#DIV/0!	#DIV/0!	#DIV/0!	#DIV/0!	#DIV/0!	#DIV/0!	#DIV/0!	#DIV/0!	#DIV/0!	#DIV/0!	#DIV/0!	0	0	0	0	0	0	#DIV/0!	#DIV/0!	#DIV/0!	#DIV/0!	#DIV/0!	#DIV/0!	#DIV/0!	0
						#DIV/0!		#DIV/0!															#DIV/0!	#DIV/0!	#DIV/0!	#DIV/0!	#DIV/0!	#DIV/0!	#DIV/0!	#DIV/0!	#DIV/0!	#DIV/0!	#DIV/0!	#DIV/0!	#DIV/0!	0	0	0	0	0	0	#DIV/0!	#DIV/0!	#DIV/0!	#DIV/0!	#DIV/0!	#DIV/0!	#DIV/0!	0
						#DIV/0!		#DIV/0!															#DIV/0!	#DIV/0!	#DIV/0!	#DIV/0!	#DIV/0!	#DIV/0!	#DIV/0!	#DIV/0!	#DIV/0!	#DIV/0!	#DIV/0!	#DIV/0!	#DIV/0!	0	0	0	0	0	0	#DIV/0!	#DIV/0!	#DIV/0!	#DIV/0!	#DIV/0!	#DIV/0!	#DIV/0!	0
						#DIV/0!		#DIV/0!															#DIV/0!	#DIV/0!	#DIV/0!	#DIV/0!	#DIV/0!	#DIV/0!	#DIV/0!	#DIV/0!	#DIV/0!	#DIV/0!	#DIV/0!	#DIV/0!	#DIV/0!	0	0	0	0	0	0	#DIV/0!	#DIV/0!	#DIV/0!	#DIV/0!	#DIV/0!	#DIV/0!	#DIV/0!	0
						#DIV/0!		#DIV/0!															#DIV/0!	#DIV/0!	#DIV/0!	#DIV/0!	#DIV/0!	#DIV/0!	#DIV/0!	#DIV/0!	#DIV/0!	#DIV/0!	#DIV/0!	#DIV/0!	#DIV/0!	0	0	0	0	0	0	#DIV/0!	#DIV/0!	#DIV/0!	#DIV/0!	#DIV/0!	#DIV/0!	#DIV/0!	0
						#DIV/0!		#DIV/0!															#DIV/0!	#DIV/0!	#DIV/0!	#DIV/0!	#DIV/0!	#DIV/0!	#DIV/0!	#DIV/0!	#DIV/0!	#DIV/0!	#DIV/0!	#DIV/0!	#DIV/0!	0	0	0	0	0	0	#DIV/0!	#DIV/0!	#DIV/0!	#DIV/0!	#DIV/0!	#DIV/0!	#DIV/0!	0
						#DIV/0!		#DIV/0!															#DIV/0!	#DIV/0!	#DIV/0!	#DIV/0!	#DIV/0!	#DIV/0!	#DIV/0!	#DIV/0!	#DIV/0!	#DIV/0!	#DIV/0!	#DIV/0!	#DIV/0!	0	0	0	0	0	0	#DIV/0!	#DIV/0!	#DIV/0!	#DIV/0!	#DIV/0!	#DIV/0!	#DIV/0!	0
						#DIV/0!		#DIV/0!															#DIV/0!	#DIV/0!	#DIV/0!	#DIV/0!	#DIV/0!	#DIV/0!	#DIV/0!	#DIV/0!	#DIV/0!	#DIV/0!	#DIV/0!	#DIV/0!	#DIV/0!	0	0	0	0	0	0	#DIV/0!	#DIV/0!	#DIV/0!	#DIV/0!	#DIV/0!	#DIV/0!	#DIV/0!	0
						#DIV/0!		#DIV/0!															#DIV/0!	#DIV/0!	#DIV/0!	#DIV/0!	#DIV/0!	#DIV/0!	#DIV/0!	#DIV/0!	#DIV/0!	#DIV/0!	#DIV/0!	#DIV/0!	#DIV/0!	0	0	0	0	0	0	#DIV/0!	#DIV/0!	#DIV/0!	#DIV/0!	#DIV/0!	#DIV/0!	#DIV/0!	0
						#DIV/0!		#DIV/0!															#DIV/0!	#DIV/0!	#DIV/0!	#DIV/0!	#DIV/0!	#DIV/0!	#DIV/0!	#DIV/0!	#DIV/0!	#DIV/0!	#DIV/0!	#DIV/0!	#DIV/0!	0	0	0	0	0	0	#DIV/0!	#DIV/0!	#DIV/0!	#DIV/0!	#DIV/0!	#DIV/0!	#DIV/0!	0
						#DIV/0!		#DIV/0!															#DIV/0!	#DIV/0!	#DIV/0!	#DIV/0!	#DIV/0!	#DIV/0!	#DIV/0!	#DIV/0!	#DIV/0!	#DIV/0!	#DIV/0!	#DIV/0!	#DIV/0!	0	0	0	0	0	0	#DIV/0!	#DIV/0!	#DIV/0!	#DIV/0!	#DIV/0!	#DIV/0!	#DIV/0!	0
						#DIV/0!		#DIV/0!															#DIV/0!	#DIV/0!	#DIV/0!	#DIV/0!	#DIV/0!	#DIV/0!	#DIV/0!	#DIV/0!	#DIV/0!	#DIV/0!	#DIV/0!	#DIV/0!	#DIV/0!	0	0	0	0	0	0	#DIV/0!	#DIV/0!	#DIV/0!	#DIV/0!	#DIV/0!	#DIV/0!	#DIV/0!	0
						#DIV/0!		#DIV/0!															#DIV/0!	#DIV/0!	#DIV/0!	#DIV/0!	#DIV/0!	#DIV/0!	#DIV/0!	#DIV/0!	#DIV/0!	#DIV/0!	#DIV/0!	#DIV/0!	#DIV/0!	0	0	0	0	0	0	#DIV/0!	#DIV/0!	#DIV/0!	#DIV/0!	#DIV/0!	#DIV/0!	#DIV/0!	0
						#DIV/0!		#DIV/0!															#DIV/0!	#DIV/0!	#DIV/0!	#DIV/0!	#DIV/0!	#DIV/0!	#DIV/0!	#DIV/0!	#DIV/0!	#DIV/0!	#DIV/0!	#DIV/0!	#DIV/0!	0	0	0	0	0	0	#DIV/0!	#DIV/0!	#DIV/0!	#DIV/0!	#DIV/0!	#DIV/0!	#DIV/0!	0
						#DIV/0!		#DIV/0!															#DIV/0!	#DIV/0!	#DIV/0!	#DIV/0!	#DIV/0!	#DIV/0!	#DIV/0!	#DIV/0!	#DIV/0!	#DIV/0!	#DIV/0!	#DIV/0!	#DIV/0!	0	0	0	0	0	0	#DIV/0!	#DIV/0!	#DIV/0!	#DIV/0!	#DIV/0!	#DIV/0!	#DIV/0!	0
						#DIV/0!		#DIV/0!															#DIV/0!	#DIV/0!	#DIV/0!	#DIV/0!	#DIV/0!	#DIV/0!	#DIV/0!	#DIV/0!	#DIV/0!	#DIV/0!	#DIV/0!	#DIV/0!	#DIV/0!	0	0	0	0	0	0	#DIV/0!	#DIV/0!	#DIV/0!	#DIV/0!	#DIV/0!	#DIV/0!	#DIV/0!	0
						#DIV/0!		#DIV/0!															#DIV/0!	#DIV/0!	#DIV/0!	#DIV/0!	#DIV/0!	#DIV/0!	#DIV/0!	#DIV/0!	#DIV/0!	#DIV/0!	#DIV/0!	#DIV/0!	#DIV/0!	0	0	0	0	0	0	#DIV/0!	#DIV/0!	#DIV/0!	#DIV/0!	#DIV/0!	#DIV/0!	#DIV/0!	0
						#DIV/0!		#DIV/0!															#DIV/0!	#DIV/0!	#DIV/0!	#DIV/0!	#DIV/0!	#DIV/0!	#DIV/0!	#DIV/0!	#DIV/0!	#DIV/0!	#DIV/0!	#DIV/0!	#DIV/0!	0	0	0	0	0	0	#DIV/0!	#DIV/0!	#DIV/0!	#DIV/0!	#DIV/0!	#DIV/0!	#DIV/0!	0
						#DIV/0!		#DIV/0!															#DIV/0!	#DIV/0!	#DIV/0!	#DIV/0!	#DIV/0!	#DIV/0!	#DIV/0!	#DIV/0!	#DIV/0!	#DIV/0!	#DIV/0!	#DIV/0!	#DIV/0!	0	0	0	0	0	0	#DIV/0!	#DIV/0!	#DIV/0!	#DIV/0!	#DIV/0!	#DIV/0!	#DIV/0!	0
						#DIV/0!		#DIV/0!															#DIV/0!	#DIV/0!	#DIV/0!	#DIV/0!	#DIV/0!	#DIV/0!	#DIV/0!	#DIV/0!	#DIV/0!	#DIV/0!	#DIV/0!	#DIV/0!	#DIV/0!	0	0	0	0	0	0	#DIV/0!	#DIV/0!	#DIV/0!	#DIV/0!	#DIV/0!	#DIV/0!	#DIV/0!	0
						#DIV/0!		#DIV/0!															#DIV/0!	#DIV/0!	#DIV/0!	#DIV/0!	#DIV/0!	#DIV/0!	#DIV/0!	#DIV/0!	#DIV/0!	#DIV/0!	#DIV/0!	#DIV/0!	#DIV/0!	0	0	0	0	0	0	#DIV/0!	#DIV/0!	#DIV/0!	#DIV/0!	#DIV/0!	#DIV/0!	#DIV/0!	0
						#DIV/0!		#DIV/0!															#DIV/0!	#DIV/0!	#DIV/0!	#DIV/0!	#DIV/0!	#DIV/0!	#DIV/0!	#DIV/0!	#DIV/0!	#DIV/0!	#DIV/0!	#DIV/0!	#DIV/0!	0	0	0	0	0	0	#DIV/0!	#DIV/0!	#DIV/0!	#DIV/0!	#DIV/0!	#DIV/0!	#DIV/0!	0
						#DIV/0!		#DIV/0!															#DIV/0!	#DIV/0!	#DIV/0!	#DIV/0!	#DIV/0!	#DIV/0!	#DIV/0!	#DIV/0!	#DIV/0!	#DIV/0!	#DIV/0!	#DIV/0!	#DIV/0!	0	0	0	0	0	0	#DIV/0!	#DIV/0!	#DIV/0!	#DIV/0!	#DIV/0!	#DIV/0!	#DIV/0!	0
						#DIV/0!		#DIV/0!															#DIV/0!	#DIV/0!	#DIV/0!	#DIV/0!	#DIV/0!	#DIV/0!	#DIV/0!	#DIV/0!	#DIV/0!	#DIV/0!	#DIV/0!	#DIV/0!	#DIV/0!	0	0	0	0	0	0	#DIV/0!	#DIV/0!	#DIV/0!	#DIV/0!	#DIV/0!	#DIV/0!	#DIV/0!	0
						#DIV/0!		#DIV/0!															#DIV/0!	#DIV/0!	#DIV/0!	#DIV/0!	#DIV/0!	#DIV/0!	#DIV/0!	#DIV/0!	#DIV/0!	#DIV/0!	#DIV/0!	#DIV/0!	#DIV/0!	0	0	0	0	0	0	#DIV/0!	#DIV/0!	#DIV/0!	#DIV/0!	#DIV/0!	#DIV/0!	#DIV/0!	0
						#DIV/0!		#DIV/0!															#DIV/0!	#DIV/0!	#DIV/0!	#DIV/0!	#DIV/0!	#DIV/0!	#DIV/0!	#DIV/0!	#DIV/0!	#DIV/0!	#DIV/0!	#DIV/0!	#DIV/0!	0	0	0	0	0	0	#DIV/0!	#DIV/0!	#DIV/0!	#DIV/0!	#DIV/0!	#DIV/0!	#DIV/0!	0
						#DIV/0!		#DIV/0!															#DIV/0!	#DIV/0!	#DIV/0!	#DIV/0!	#DIV/0!	#DIV/0!	#DIV/0!	#DIV/0!	#DIV/0!	#DIV/0!	#DIV/0!	#DIV/0!	#DIV/0!	0	0	0	0	0	0	#DIV/0!	#DIV/0!	#DIV/0!	#DIV/0!	#DIV/0!	#DIV/0!	#DIV/0!	0
						#DIV/0!		#DIV/0!															#DIV/0!	#DIV/0!	#DIV/0!	#DIV/0!	#DIV/0!	#DIV/0!	#DIV/0!	#DIV/0!	#DIV/0!	#DIV/0!	#DIV/0!	#DIV/0!	#DIV/0!	0	0	0	0	0	0	#DIV/0!	#DIV/0!	#DIV/0!	#DIV/0!	#DIV/0!	#DIV/0!	#DIV/0!	0
						#DIV/0!		#DIV/0!															#DIV/0!	#DIV/0!	#DIV/0!	#DIV/0!	#DIV/0!	#DIV/0!	#DIV/0!	#DIV/0!	#DIV/0!	#DIV/0!	#DIV/0!	#DIV/0!	#DIV/0!	0	0	0	0	0	0	#DIV/0!	#DIV/0!	#DIV/0!	#DIV/0!	#DIV/0!	#DIV/0!	#DIV/0!	0
						#DIV/0!		#DIV/0!															#DIV/0!	#DIV/0!	#DIV/0!	#DIV/0!	#DIV/0!	#DIV/0!	#DIV/0!	#DIV/0!	#DIV/0!	#DIV/0!	#DIV/0!	#DIV/0!	#DIV/0!	0	0	0	0	0	0	#DIV/0!	#DIV/0!	#DIV/0!	#DIV/0!	#DIV/0!	#DIV/0!	#DIV/0!	0
						#DIV/0!		#DIV/0!															#DIV/0!	#DIV/0!	#DIV/0!	#DIV/0!	#DIV/0!	#DIV/0!	#DIV/0!	#DIV/0!	#DIV/0!	#DIV/0!	#DIV/0!	#DIV/0!	#DIV/0!	0	0	0	0	0	0	#DIV/0!	#DIV/0!	#DIV/0!	#DIV/0!	#DIV/0!	#DIV/0!	#DIV/0!	0
						#DIV/0!		#DIV/0!															#DIV/0!	#DIV/0!	#DIV/0!	#DIV/0!	#DIV/0!	#DIV/0!	#DIV/0!	#DIV/0!	#DIV/0!	#DIV/0!	#DIV/0!	#DIV/0!	#DIV/0!	0	0	0	0	0	0	#DIV/0!	#DIV/0!	#DIV/0!	#DIV/0!	#DIV/0!	#DIV/0!	#DIV/0!	0
						#DIV/0!		#DIV/0!															#DIV/0!	#DIV/0!	#DIV/0!	#DIV/0!	#DIV/0!	#DIV/0!	#DIV/0!	#DIV/0!	#DIV/0!	#DIV/0!	#DIV/0!	#DIV/0!	#DIV/0!	0	0	0	0	0	0	#DIV/0!	#DIV/0!	#DIV/0!	#DIV/0!	#DIV/0!	#DIV/0!	#DIV/0!	0
						#DIV/0!		#DIV/0!															#DIV/0!	#DIV/0!	#DIV/0!	#DIV/0!	#DIV/0!	#DIV/0!	#DIV/0!	#DIV/0!	#DIV/0!	#DIV/0!	#DIV/0!	#DIV/0!	#DIV/0!	0	0	0	0	0	0	#DIV/0!	#DIV/0!	#DIV/0!	#DIV/0!	#DIV/0!	#DIV/0!	#DIV/0!	0
						#DIV/0!		#DIV/0!															#DIV/0!	#DIV/0!	#DIV/0!	#DIV/0!	#DIV/0!	#DIV/0!	#DIV/0!	#DIV/0!	#DIV/0!	#DIV/0!	#DIV/0!	#DIV/0!	#DIV/0!	0	0	0	0	0	0	#DIV/0!	#DIV/0!	#DIV/0!	#DIV/0!	#DIV/0!	#DIV/0!	#DIV/0!	0
						#DIV/0!		#DIV/0!															#DIV/0!	#DIV/0!	#DIV/0!	#DIV/0!	#DIV/0!	#DIV/0!	#DIV/0!	#DIV/0!	#DIV/0!	#DIV/0!	#DIV/0!	#DIV/0!	#DIV/0!	0	0	0	0	0	0	#DIV/0!	#DIV/0!	#DIV/0!	#DIV/0!	#DIV/0!	#DIV/0!	#DIV/0!	0
						#DIV/0!		#DIV/0!															#DIV/0!	#DIV/0!	#DIV/0!	#DIV/0!	#DIV/0!	#DIV/0!	#DIV/0!	#DIV/0!	#DIV/0!	#DIV/0!	#DIV/0!	#DIV/0!	#DIV/0!	0	0	0	0	0	0	#DIV/0!	#DIV/0!	#DIV/0!	#DIV/0!	#DIV/0!	#DIV/0!	#DIV/0!	0
						#DIV/0!		#DIV/0!															#DIV/0!	#DIV/0!	#DIV/0!	#DIV/0!	#DIV/0!	#DIV/0!	#DIV/0!	#DIV/0!	#DIV/0!	#DIV/0!	#DIV/0!	#DIV/0!	#DIV/0!	0	0	0	0	0	0	#DIV/0!	#DIV/0!	#DIV/0!	#DIV/0!	#DIV/0!	#DIV/0!	#DIV/0!	0
						#DIV/0!		#DIV/0!															#DIV/0!	#DIV/0!	#DIV/0!	#DIV/0!	#DIV/0!	#DIV/0!	#DIV/0!	#DIV/0!	#DIV/0!	#DIV/0!	#DIV/0!	#DIV/0!	#DIV/0!	0	0	0	0	0	0	#DIV/0!	#DIV/0!	#DIV/0!	#DIV/0!	#DIV/0!	#DIV/0!	#DIV/0!	0
						#DIV/0!		#DIV/0!															#DIV/0!	#DIV/0!	#DIV/0!	#DIV/0!	#DIV/0!	#DIV/0!	#DIV/0!	#DIV/0!	#DIV/0!	#DIV/0!	#DIV/0!	#DIV/0!	#DIV/0!	0	0	0	0	0	0	#DIV/0!	#DIV/0!	#DIV/0!	#DIV/0!	#DIV/0!	#DIV/0!	#DIV/0!	0
						#DIV/0!		#DIV/0!															#DIV/0!	#DIV/0!	#DIV/0!	#DIV/0!	#DIV/0!	#DIV/0!	#DIV/0!	#DIV/0!	#DIV/0!	#DIV/0!	#DIV/0!	#DIV/0!	#DIV/0!	0	0	0	0	0	0	#DIV/0!	#DIV/0!	#DIV/0!	#DIV/0!	#DIV/0!	#DIV/0!	#DIV/0!	0
						#DIV/0!		#DIV/0!															#DIV/0!	#DIV/0!	#DIV/0!	#DIV/0!	#DIV/0!	#DIV/0!	#DIV/0!	#DIV/0!	#DIV/0!	#DIV/0!	#DIV/0!	#DIV/0!	#DIV/0!	0	0	0	0	0	0	#DIV/0!	#DIV/0!	#DIV/0!	#DIV/0!	#DIV/0!	#DIV/0!	#DIV/0!	0
						#DIV/0!		#DIV/0!															#DIV/0!	#DIV/0!	#DIV/0!	#DIV/0!	#DIV/0!	#DIV/0!	#DIV/0!	#DIV/0!	#DIV/0!	#DIV/0!	#DIV/0!	#DIV/0!	#DIV/0!	0	0	0	0	0	0	#DIV/0!	#DIV/0!	#DIV/0!	#DIV/0!	#DIV/0!	#DIV/0!	#DIV/0!	0
						#DIV/0!		#DIV/0!															#DIV/0!	#DIV/0!	#DIV/0!	#DIV/0!	#DIV/0!	#DIV/0!	#DIV/0!	#DIV/0!	#DIV/0!	#DIV/0!	#DIV/0!	#DIV/0!	#DIV/0!	0	0	0	0	0	0	#DIV/0!	#DIV/0!	#DIV/0!	#DIV/0!	#DIV/0!	#DIV/0!	#DIV/0!	0
						#DIV/0!		#DIV/0!															#DIV/0!	#DIV/0!	#DIV/0!	#DIV/0!	#DIV/0!	#DIV/0!	#DIV/0!	#DIV/0!	#DIV/0!	#DIV/0!	#DIV/0!	#DIV/0!	#DIV/0!	0	0	0	0	0	0	#DIV/0!	#DIV/0!	#DIV/0!	#DIV/0!	#DIV/0!	#DIV/0!	#DIV/0!	0
						#DIV/0!		#DIV/0!															#DIV/0!	#DIV/0!	#DIV/0!	#DIV/0!	#DIV/0!	#DIV/0!	#DIV/0!	#DIV/0!	#DIV/0!	#DIV/0!	#DIV/0!	#DIV/0!	#DIV/0!	0	0	0	0	0	0	#DIV/0!	#DIV/0!	#DIV/0!	#DIV/0!	#DIV/0!	#DIV/0!	#DIV/0!	0
						#DIV/0!		#DIV/0!															#DIV/0!	#DIV/0!	#DIV/0!	#DIV/0!	#DIV/0!	#DIV/0!	#DIV/0!	#DIV/0!	#DIV/0!	#DIV/0!	#DIV/0!	#DIV/0!	#DIV/0!	0	0	0	0	0	0	#DIV/0!	#DIV/0!	#DIV/0!	#DIV/0!	#DIV/0!	#DIV/0!	#DIV/0!	0
						#DIV/0!		#DIV/0!
						#DIV/0!		#DIV/0!
						#DIV/0!		#DIV/0!
						#DIV/0!		#DIV/0!
						#DIV/0!		#DIV/0!
						#DIV/0!		#DIV/0!
						#DIV/0!		#DIV/0!
						#DIV/0!		#DIV/0!
						#DIV/0!		#DIV/0!
						#DIV/0!		#DIV/0!
						#DIV/0!		#DIV/0!
						#DIV/0!		#DIV/0!
						#DIV/0!		#DIV/0!
						#DIV/0!		#DIV/0!
						#DIV/0!		#DIV/0!
[truncated: 33 more columns]

## Sheet: Site7
Date:	15/8/2014
Site No. :	2v34
			Width (m)	Length (m)	Area (ha)			Length (m)
	Transect Dimensions:		7	50	0.035
	Co-ordinates:			X	Y			X
			NW Corner
			SW Corner
			NE Corner
			SE Corner
									OED		OUD	NED		NUD	NFD	OFD	OBE	OBU	NBE	NBU	RE	Notes	Canopy volume (m3)																				Damage
Trans. No.	Sp. Code	Coppice	Height (m)	D1 (m)	D2 (m)	R	Shape	Adj. shape	Score	Eaten		Score	Eaten										Total	0.5	1	2	3	4	5	0.5	1	2	3	4	5	OED	OUD	NED	NUD	NFD	OFD	Old Rec. Vol.	OED	OUD	NED	NUD	NFD	OFD	Sp. Code
1	Col mop	T	1.6	1.24	1.62	0.715	1	1	2														2.5697	0.80303	1.60606	3.21212	4.81818	6.42424	8.0303	0.80303	1.60606	2.5697	2.5697	2.5697	2.5697	18	0	0	0	0	0	3.13378	56.408	0	0	0	0	0	Col mop
1	Col mop	T	2.7	1.85	1.7	0.8875	1	1	3														6.68114	1.23725	2.4745	4.94899	7.42349	9.89798	12.3725	1.23725	2.4745	4.94899	6.68114	6.68114	6.68114	38	0	0	0	0	0	10.776	409.489	0	0	0	0	0	Col mop
1	Col mop	T	2.2	2.37	2.28	1.1625	1	1	1														9.34025	2.12278	4.24557	8.49114	12.7367	16.9823	21.2278	2.12278	4.24557	8.49114	9.34025	9.34025	9.34025	5.5	0	0	0	0	0	9.88386	54.3612	0	0	0	0	0	Col mop
1	Gre bic	T	1.8	1.6	1.67	0.8175	1	1	3														3.77918	1.04977	2.09955	4.19909	6.29864	8.39818	10.4977	1.04977	2.09955	3.77918	3.77918	3.77918	3.77918	38	0	0	0	0	0	6.09546	231.627	0	0	0	0	0	Gre bic
1	Col mop	T	0.7	1	0.95	0.4875	1	1															0.522633	0.37331	0.746619	1.49324	2.23986	2.98648	3.7331	0.37331	0.522633	0.522633	0.522633	0.522633	0.522633	0	0	0	0	0	0	0.522633	0	0	0	0	0	0	Col mop
1	Col mop	T	1.05	1.7	1.5	0.8	1	1			1												2.11115	1.00531	2.01062	4.02124	6.03186	8.04248	10.0531	1.00531	2.01062	2.11115	2.11115	2.11115	2.11115	0	5.5	0	0	0	0	2.23402	0	12.2871	0	0	0	0	Col mop
1	Col mop	T	0.55	1	0.85	0.4625	6	7															0.265795	0.262297	-0.123471	-5.97537	-23.8319	-59.9698	-120.666	0.262297	0.265795	0.265795	0.265795	0.265795	0.265795	0	0	0	0	0	0	0.265795	0	0	0	0	0	0	Col mop
1	Col mop	T	1.7	1.1	0.8	0.475	3	3			1												0.401264	0.260131	0.37325	0.403469	0.580702	1.39499	3.33638	0.260131	0.37325	0.401264	0.401264	0.401264	0.401264	0	5.5	0	0	0	0	0.424618	0	2.3354	0	0	0	0	Col mop
1	Gre bic	T	1.5	1.78	1.3	0.77	3	3	3														0.930394	0.654722	0.895935	0.964853	1.86079	5.23777	12.7498	0.654722	0.895935	0.930394	0.930394	0.930394	0.930394	38	0	0	0	0	0	1.50064	57.0241	0	0	0	0	0	Gre bic
1	Com mos	T	1.74	0.6	0.6	0.3	3	3			1												0.163827	0.104534	0.151225	0.164374	0.226036	0.522802	1.24126	0.104534	0.151225	0.163827	0.163827	0.163827	0.163827	0	5.5	0	0	0	0	0.173362	0	0.953491	0	0	0	0	Com mos
1	Col mop	T	2.05	1.1	1.65	0.6875	1	1	2		4												3.04403	0.742447	1.48489	2.96979	4.45468	5.93957	7.42447	0.742447	1.48489	2.96979	3.04403	3.04403	3.04403	18	63	0	0	0	0	16.0212	288.382	1009.34	0	0	0	0	Col mop
1	Col mop	T	0.3	0.25	0.15	0.1	1	1						4									0.00942478	0.015708	0.0314159	0.0628319	0.0942478	0.125664	0.15708	0.00942478	0.00942478	0.00942478	0.00942478	0.00942478	0.00942478	0	0	0	63	0	0	0.00942478	0	0	0	1.60476	0	0	Col mop
1	Col mop	T	0.4	0.82	0.36	0.295	6	7						4									0.082421	0.0721164	-0.476851	-6.57277	-24.5634	-60.7257	-121.337	0.082421	0.082421	0.082421	0.082421	0.082421	0.082421	0	0	0	63	0	0	0.082421	0	0	0	14.0339	0	0	Col mop
1	Col mop	T	1.5	1.3	1.28	0.645	1	1			1												1.96047	0.653491	1.30698	2.61396	3.92094	5.22792	6.53491	0.653491	1.30698	1.96047	1.96047	1.96047	1.96047	0	5.5	0	0	0	0	2.07457	0	11.4102	0	0	0	0	Col mop
1	Dic cin	T	0.1	0.16	0.14	0.075	1	1						4									0.00176715	0.00883573	0.0176715	0.0353429	0.0530144	0.0706858	0.0883573	0.00176715	0.00176715	0.00176715	0.00176715	0.00176715	0.00176715	0	0	0	63	0	0	0.00176715	0	0	0	0.300892	0	0	Dic cin
1	Col mop	T	0.17	0.26	0.2	0.115	1	1															0.00706309	0.0207738	0.0415476	0.0830951	0.124643	0.16619	0.207738	0.00706309	0.00706309	0.00706309	0.00706309	0.00706309	0.00706309	0	0	0	0	0	0	0.00706309	0	0	0	0	0	0	Col mop
1	Col mop	T	0.4	0.3	0.34	0.16	7	7	4														0.027872	0.0218043	-0.378871	-5.54267	-21.7538	-55.2892	-112.426	0.027872	0.027872	0.027872	0.027872	0.027872	0.027872	63	0	0	0	0	0	0.0753298	4.74577	0	0	0	0	0	Col mop
1	Com mos	T	0.6	0.51	0.55	0.265	3	3			1												0.0440795	0.0438755	0.0571402	0.604053	2.86517	8.06492	17.4277	0.0438755	0.0440795	0.0440795	0.0440795	0.0440795	0.0440795	0	5.5	0	0	0	0	0.046645	0	0.256548	0	0	0	0	Com mos
1	Col mop	T	1.2	1.3	0.68	0.495	1	1	3			1											0.923722	0.384884	0.769769	1.53954	2.30931	3.07907	3.84884	0.384884	0.769769	0.923722	0.923722	0.923722	0.923722	38	0	5.5	0	0	0	1.48987	56.6152	0	5.37616	0	0	0	Col mop
1	Col mop	T	1.78	1.4	1.5	0.725	1	1	4														2.93931	0.82565	1.6513	3.3026	4.9539	6.6052	8.2565	0.82565	1.6513	2.93931	2.93931	2.93931	2.93931	63	0	0	0	0	0	7.94409	500.478	0	0	0	0	0	Col mop
1	Col mop	T	1.1	1.6	1.39	0.7475	2	2			2			2									0.642997	0.0603867	0.483093	3.86475	13.0435	30.918	60.3867	0.0603867	0.483093	0.642997	0.642997	0.642997	0.642997	0	18	0	18	0	0	0.784143	0	14.1146	0	14.1146	0	0	Col mop
1	Col mop	T	3	1.3	1.68	0.745	2	2	4			1		1									1.74192	0.00806444	0.0645155	0.516124	1.74192	4.12899	8.06444	0.00806444	0.0645155	0.516124	1.74192	1.74192	1.74192	63	0	5.5	5.5	0	0	4.70789	296.597	0	10.7647	10.7647	0	0	Col mop
1	Col mop	T	0.35	0.98	0.6	0.395	6	1			1												0.171558	0.245083	0.490167	0.980334	1.4705	1.96067	2.45083	0.171558	0.171558	0.171558	0.171558	0.171558	0.171558	0	5.5	0	0	0	0	0.181543	0	0.998488	0	0	0	0	Col mop
1	Col mop	C	1.75	1.6	1.4	0.75	1	1	5														3.09251	0.883573	1.76715	3.53429	5.30144	7.06858	8.83573	0.883573	1.76715	3.09251	3.09251	3.09251	3.09251	83	0	0	0	0	0	18.1912	1509.87	0	0	0	0	0	Col mop
1	Col mop	T	2.5	2.23	1.78	1.0025	3	3	5			2											2.62847	1.28269	2.06072	2.60744	2.6495	3.19622	5.25694	1.28269	2.06072	2.60744	2.62847	2.62847	2.62847	83	0	18	0	0	0	15.4616	1283.31	0	57.6981	0	0	0	Col mop
1	Col mop	C	0.84	1.4	1.2	0.65	1	1			1												1.11495	0.663661	1.32732	2.65465	3.98197	5.30929	6.63661	0.663661	1.11495	1.11495	1.11495	1.11495	1.11495	0	5.5	0	0	0	0	1.17984	0	6.48913	0	0	0	0	Col mop
1	Col mop	T	0.55	0.7	0.85	0.3875	1	1			2												0.259451	0.235865	0.47173	0.94346	1.41519	1.88692	2.35865	0.235865	0.259451	0.259451	0.259451	0.259451	0.259451	0	18	0	0	0	0	0.316404	0	5.69527	0	0	0	0	Col mop
1	Col mop	C	1.6	2.3	1.75	1.0125	1	1				3											5.153	1.61031	3.22062	6.44125	9.66187	12.8825	16.1031	1.61031	3.22062	5.153	5.153	5.153	5.153	0	0	38	0	0	0	5.153	0	0	315.829	0	0	0	Col mop
1	Col mop	T	1.4	1.28	1.4	0.67	1	1			1												1.97437	0.70513	1.41026	2.82052	4.23078	5.64104	7.0513	0.70513	1.41026	1.97437	1.97437	1.97437	1.97437	0	5.5	0	0	0	0	2.08928	0	11.491	0	0	0	0	Col mop
1	Col mop	T	0.15	0.26	0.15	0.1025	1	1															0.00495095	0.0165032	0.0330064	0.0660127	0.0990191	0.132025	0.165032	0.00495095	0.00495095	0.00495095	0.00495095	0.00495095	0.00495095	0	0	0	0	0	0	0.00495095	0	0	0	0	0	0	Col mop
1	Gre fla	T	0.8	1.14	1.05	0.5475	3	3	3														0.250872	0.237643	0.254792	1.09757	5.46823	16.3067	36.5528	0.237643	0.250872	0.250872	0.250872	0.250872	0.250872	38	0	0	0	0	0	0.404632	15.376	0	0	0	0	0	Gre fla
1	Col mop	T	2.1	1.53	1.72	0.8125	1	1	3														4.35528	1.03697	2.07394	4.14788	6.22183	8.29577	10.3697	1.03697	2.07394	4.14788	4.35528	4.35528	4.35528	38	0	0	0	0	0	7.02464	266.936	0	0	0	0	0	Col mop
1	Col mop	T	1.4	1.8	1.1	0.725	1	1	3														2.31182	0.82565	1.6513	3.3026	4.9539	6.6052	8.2565	0.82565	1.6513	2.31182	2.31182	2.31182	2.31182	38	0	0	0	0	0	3.72874	141.692	0	0	0	0	0	Col mop
1	Col mop	T	0.35	0.61	0.77	0.345	6	7															0.0877871	0.0598941	-0.65698	-7.55948	-26.9844	-65.2086	-128.509	0.0877871	0.0877871	0.0877871	0.0877871	0.0877871	0.0877871	0	0	0	0	0	0	0.0877871	0	0	0	0	0	0	Col mop
1	Col mop	T	2.8	1.85	1.85	0.925	1	1	3		1												7.52647	1.34401	2.68803	5.37605	8.06408	10.7521	13.4401	1.34401	2.68803	5.37605	7.52647	7.52647	7.52647	38	5.5	0	0	0	0	13.3212	506.205	73.2665	0	0	0	0	Col mop
1	Col mop	C	1.25	1.52	1.19	0.6775	3	3	5		1												0.600237	0.470586	0.595435	0.729888	2.24729	6.99156	16.8066	0.470586	0.595435	0.600237	0.600237	0.600237	0.600237	83	5.5	0	0	0	0	5.21945	433.214	28.707	0	0	0	0	Col mop
1	Col mop	T	2.4	1.51	2.57	1.02	3	3	3			1											2.6122	1.31611	2.09369	2.6001	2.65301	3.38618	5.93337	1.31611	2.09369	2.6001	2.6122	2.6122	2.6122	38	0	5.5	0	0	0	4.21322	160.102	0	15.2033	0	0	0	Col mop
1	Col mop	C	2.75	2.6	1.75	1.0875	1	1	5			1											10.2174	1.85771	3.71542	7.43085	11.1463	14.8617	18.5771	1.85771	3.71542	7.43085	10.2174	10.2174	10.2174	83	0	5.5	0	0	0	60.1025	4988.5	0	59.4664	0	0	0	Col mop
1	Col mop	T	1.2	0.9	0.78	0.42	1	1			1												0.665012	0.277088	0.554177	1.10835	1.66253	2.21671	2.77088	0.277088	0.554177	0.665012	0.665012	0.665012	0.665012	0	5.5	0	0	0	0	0.703717	0	3.87044	0	0	0	0	Col mop
1	Col mop	T	0.6	0.92	0.58	0.375	2	2			2												0.0882689	0.0510816	0.408652	3.26922	11.0336	26.1538	51.0816	0.0510816	0.0882689	0.0882689	0.0882689	0.0882689	0.0882689	0	18	0	0	0	0	0.107645	0	1.93761	0	0	0	0	Col mop
1	Col mop	T	2.3	1.92	1.58	0.875	1	1			5												5.53215	1.20264	2.40528	4.81056	7.21585	9.62113	12.0264	1.20264	2.40528	4.81056	5.53215	5.53215	5.53215	0	83	0	0	0	0	32.542	0	2700.99	0	0	0	0	Col mop
1	Col mop	T	1.14	1.3	1.1	0.6	1	1	1														1.28931	0.565487	1.13097	2.26195	3.39292	4.52389	5.65487	0.565487	1.13097	1.28931	1.28931	1.28931	1.28931	5.5	0	0	0	0	0	1.36435	7.50392	0	0	0	0	0	Col mop
1	Col mop	T	2.1	1.5	2.11	0.9025	1	1	4														5.37358	1.27942	2.55885	5.11769	7.67654	10.2354	12.7942	1.27942	2.55885	5.11769	5.37358	5.37358	5.37358	63	0	0	0	0	0	14.5232	914.961	0	0	0	0	0	Col mop
1	Col mop	T	0.6	0.94	1.35	0.5725	7	7			2												0.420916	0.403995	0.0664806	-5.97138	-24.3904	-61.4676	-123.48	0.403995	0.420916	0.420916	0.420916	0.420916	0.420916	0	18	0	0	0	0	0.513313	0	9.23963	0	0	0	0	Col mop
1	Gre fla	T	0.4	1.22	0.99	0.5525	1	1															0.383596	0.479495	0.958991	1.91798	2.87697	3.83596	4.79495	0.383596	0.383596	0.383596	0.383596	0.383596	0.383596	0	0	0	0	0	0	0.383596	0	0	0	0	0	0	Gre fla
						#DIV/0!		#DIV/0!															#DIV/0!	#DIV/0!	#DIV/0!	#DIV/0!	#DIV/0!	#DIV/0!	#DIV/0!	#DIV/0!	#DIV/0!	#DIV/0!	#DIV/0!	#DIV/0!	#DIV/0!	0	0	0	0	0	0	#DIV/0!	#DIV/0!	#DIV/0!	#DIV/0!	#DIV/0!	#DIV/0!	#DIV/0!	0
						#DIV/0!		#DIV/0!															#DIV/0!	#DIV/0!	#DIV/0!	#DIV/0!	#DIV/0!	#DIV/0!	#DIV/0!	#DIV/0!	#DIV/0!	#DIV/0!	#DIV/0!	#DIV/0!	#DIV/0!	0	0	0	0	0	0	#DIV/0!	#DIV/0!	#DIV/0!	#DIV/0!	#DIV/0!	#DIV/0!	#DIV/0!	0
						#DIV/0!		#DIV/0!															#DIV/0!	#DIV/0!	#DIV/0!	#DIV/0!	#DIV/0!	#DIV/0!	#DIV/0!	#DIV/0!	#DIV/0!	#DIV/0!	#DIV/0!	#DIV/0!	#DIV/0!	0	0	0	0	0	0	#DIV/0!	#DIV/0!	#DIV/0!	#DIV/0!	#DIV/0!	#DIV/0!	#DIV/0!	0
						#DIV/0!		#DIV/0!															#DIV/0!	#DIV/0!	#DIV/0!	#DIV/0!	#DIV/0!	#DIV/0!	#DIV/0!	#DIV/0!	#DIV/0!	#DIV/0!	#DIV/0!	#DIV/0!	#DIV/0!	0	0	0	0	0	0	#DIV/0!	#DIV/0!	#DIV/0!	#DIV/0!	#DIV/0!	#DIV/0!	#DIV/0!	0
						#DIV/0!		#DIV/0!															#DIV/0!	#DIV/0!	#DIV/0!	#DIV/0!	#DIV/0!	#DIV/0!	#DIV/0!	#DIV/0!	#DIV/0!	#DIV/0!	#DIV/0!	#DIV/0!	#DIV/0!	0	0	0	0	0	0	#DIV/0!	#DIV/0!	#DIV/0!	#DIV/0!	#DIV/0!	#DIV/0!	#DIV/0!	0
						#DIV/0!		#DIV/0!															#DIV/0!	#DIV/0!	#DIV/0!	#DIV/0!	#DIV/0!	#DIV/0!	#DIV/0!	#DIV/0!	#DIV/0!	#DIV/0!	#DIV/0!	#DIV/0!	#DIV/0!	0	0	0	0	0	0	#DIV/0!	#DIV/0!	#DIV/0!	#DIV/0!	#DIV/0!	#DIV/0!	#DIV/0!	0
						#DIV/0!		#DIV/0!															#DIV/0!	#DIV/0!	#DIV/0!	#DIV/0!	#DIV/0!	#DIV/0!	#DIV/0!	#DIV/0!	#DIV/0!	#DIV/0!	#DIV/0!	#DIV/0!	#DIV/0!	0	0	0	0	0	0	#DIV/0!	#DIV/0!	#DIV/0!	#DIV/0!	#DIV/0!	#DIV/0!	#DIV/0!	0
						#DIV/0!		#DIV/0!															#DIV/0!	#DIV/0!	#DIV/0!	#DIV/0!	#DIV/0!	#DIV/0!	#DIV/0!	#DIV/0!	#DIV/0!	#DIV/0!	#DIV/0!	#DIV/0!	#DIV/0!	0	0	0	0	0	0	#DIV/0!	#DIV/0!	#DIV/0!	#DIV/0!	#DIV/0!	#DIV/0!	#DIV/0!	0
						#DIV/0!		#DIV/0!															#DIV/0!	#DIV/0!	#DIV/0!	#DIV/0!	#DIV/0!	#DIV/0!	#DIV/0!	#DIV/0!	#DIV/0!	#DIV/0!	#DIV/0!	#DIV/0!	#DIV/0!	0	0	0	0	0	0	#DIV/0!	#DIV/0!	#DIV/0!	#DIV/0!	#DIV/0!	#DIV/0!	#DIV/0!	0
						#DIV/0!		#DIV/0!															#DIV/0!	#DIV/0!	#DIV/0!	#DIV/0!	#DIV/0!	#DIV/0!	#DIV/0!	#DIV/0!	#DIV/0!	#DIV/0!	#DIV/0!	#DIV/0!	#DIV/0!	0	0	0	0	0	0	#DIV/0!	#DIV/0!	#DIV/0!	#DIV/0!	#DIV/0!	#DIV/0!	#DIV/0!	0
						#DIV/0!		#DIV/0!															#DIV/0!	#DIV/0!	#DIV/0!	#DIV/0!	#DIV/0!	#DIV/0!	#DIV/0!	#DIV/0!	#DIV/0!	#DIV/0!	#DIV/0!	#DIV/0!	#DIV/0!	0	0	0	0	0	0	#DIV/0!	#DIV/0!	#DIV/0!	#DIV/0!	#DIV/0!	#DIV/0!	#DIV/0!	0
						#DIV/0!		#DIV/0!															#DIV/0!	#DIV/0!	#DIV/0!	#DIV/0!	#DIV/0!	#DIV/0!	#DIV/0!	#DIV/0!	#DIV/0!	#DIV/0!	#DIV/0!	#DIV/0!	#DIV/0!	0	0	0	0	0	0	#DIV/0!	#DIV/0!	#DIV/0!	#DIV/0!	#DIV/0!	#DIV/0!	#DIV/0!	0
						#DIV/0!		#DIV/0!															#DIV/0!	#DIV/0!	#DIV/0!	#DIV/0!	#DIV/0!	#DIV/0!	#DIV/0!	#DIV/0!	#DIV/0!	#DIV/0!	#DIV/0!	#DIV/0!	#DIV/0!	0	0	0	0	0	0	#DIV/0!	#DIV/0!	#DIV/0!	#DIV/0!	#DIV/0!	#DIV/0!	#DIV/0!	0
						#DIV/0!		#DIV/0!															#DIV/0!	#DIV/0!	#DIV/0!	#DIV/0!	#DIV/0!	#DIV/0!	#DIV/0!	#DIV/0!	#DIV/0!	#DIV/0!	#DIV/0!	#DIV/0!	#DIV/0!	0	0	0	0	0	0	#DIV/0!	#DIV/0!	#DIV/0!	#DIV/0!	#DIV/0!	#DIV/0!	#DIV/0!	0
						#DIV/0!		#DIV/0!															#DIV/0!	#DIV/0!	#DIV/0!	#DIV/0!	#DIV/0!	#DIV/0!	#DIV/0!	#DIV/0!	#DIV/0!	#DIV/0!	#DIV/0!	#DIV/0!	#DIV/0!	0	0	0	0	0	0	#DIV/0!	#DIV/0!	#DIV/0!	#DIV/0!	#DIV/0!	#DIV/0!	#DIV/0!	0
						#DIV/0!		#DIV/0!															#DIV/0!	#DIV/0!	#DIV/0!	#DIV/0!	#DIV/0!	#DIV/0!	#DIV/0!	#DIV/0!	#DIV/0!	#DIV/0!	#DIV/0!	#DIV/0!	#DIV/0!	0	0	0	0	0	0	#DIV/0!	#DIV/0!	#DIV/0!	#DIV/0!	#DIV/0!	#DIV/0!	#DIV/0!	0
						#DIV/0!		#DIV/0!															#DIV/0!	#DIV/0!	#DIV/0!	#DIV/0!	#DIV/0!	#DIV/0!	#DIV/0!	#DIV/0!	#DIV/0!	#DIV/0!	#DIV/0!	#DIV/0!	#DIV/0!	0	0	0	0	0	0	#DIV/0!	#DIV/0!	#DIV/0!	#DIV/0!	#DIV/0!	#DIV/0!	#DIV/0!	0
						#DIV/0!		#DIV/0!															#DIV/0!	#DIV/0!	#DIV/0!	#DIV/0!	#DIV/0!	#DIV/0!	#DIV/0!	#DIV/0!	#DIV/0!	#DIV/0!	#DIV/0!	#DIV/0!	#DIV/0!	0	0	0	0	0	0	#DIV/0!	#DIV/0!	#DIV/0!	#DIV/0!	#DIV/0!	#DIV/0!	#DIV/0!	0
						#DIV/0!		#DIV/0!															#DIV/0!	#DIV/0!	#DIV/0!	#DIV/0!	#DIV/0!	#DIV/0!	#DIV/0!	#DIV/0!	#DIV/0!	#DIV/0!	#DIV/0!	#DIV/0!	#DIV/0!	0	0	0	0	0	0	#DIV/0!	#DIV/0!	#DIV/0!	#DIV/0!	#DIV/0!	#DIV/0!	#DIV/0!	0
						#DIV/0!		#DIV/0!															#DIV/0!	#DIV/0!	#DIV/0!	#DIV/0!	#DIV/0!	#DIV/0!	#DIV/0!	#DIV/0!	#DIV/0!	#DIV/0!	#DIV/0!	#DIV/0!	#DIV/0!	0	0	0	0	0	0	#DIV/0!	#DIV/0!	#DIV/0!	#DIV/0!	#DIV/0!	#DIV/0!	#DIV/0!	0
						#DIV/0!		#DIV/0!															#DIV/0!	#DIV/0!	#DIV/0!	#DIV/0!	#DIV/0!	#DIV/0!	#DIV/0!	#DIV/0!	#DIV/0!	#DIV/0!	#DIV/0!	#DIV/0!	#DIV/0!	0	0	0	0	0	0	#DIV/0!	#DIV/0!	#DIV/0!	#DIV/0!	#DIV/0!	#DIV/0!	#DIV/0!	0
						#DIV/0!		#DIV/0!															#DIV/0!	#DIV/0!	#DIV/0!	#DIV/0!	#DIV/0!	#DIV/0!	#DIV/0!	#DIV/0!	#DIV/0!	#DIV/0!	#DIV/0!	#DIV/0!	#DIV/0!	0	0	0	0	0	0	#DIV/0!	#DIV/0!	#DIV/0!	#DIV/0!	#DIV/0!	#DIV/0!	#DIV/0!	0
						#DIV/0!		#DIV/0!															#DIV/0!	#DIV/0!	#DIV/0!	#DIV/0!	#DIV/0!	#DIV/0!	#DIV/0!	#DIV/0!	#DIV/0!	#DIV/0!	#DIV/0!	#DIV/0!	#DIV/0!	0	0	0	0	0	0	#DIV/0!	#DIV/0!	#DIV/0!	#DIV/0!	#DIV/0!	#DIV/0!	#DIV/0!	0
						#DIV/0!		#DIV/0!															#DIV/0!	#DIV/0!	#DIV/0!	#DIV/0!	#DIV/0!	#DIV/0!	#DIV/0!	#DIV/0!	#DIV/0!	#DIV/0!	#DIV/0!	#DIV/0!	#DIV/0!	0	0	0	0	0	0	#DIV/0!	#DIV/0!	#DIV/0!	#DIV/0!	#DIV/0!	#DIV/0!	#DIV/0!	0
						#DIV/0!		#DIV/0!															#DIV/0!	#DIV/0!	#DIV/0!	#DIV/0!	#DIV/0!	#DIV/0!	#DIV/0!	#DIV/0!	#DIV/0!	#DIV/0!	#DIV/0!	#DIV/0!	#DIV/0!	0	0	0	0	0	0	#DIV/0!	#DIV/0!	#DIV/0!	#DIV/0!	#DIV/0!	#DIV/0!	#DIV/0!	0
						#DIV/0!		#DIV/0!															#DIV/0!	#DIV/0!	#DIV/0!	#DIV/0!	#DIV/0!	#DIV/0!	#DIV/0!	#DIV/0!	#DIV/0!	#DIV/0!	#DIV/0!	#DIV/0!	#DIV/0!	0	0	0	0	0	0	#DIV/0!	#DIV/0!	#DIV/0!	#DIV/0!	#DIV/0!	#DIV/0!	#DIV/0!	0
						#DIV/0!		#DIV/0!															#DIV/0!	#DIV/0!	#DIV/0!	#DIV/0!	#DIV/0!	#DIV/0!	#DIV/0!	#DIV/0!	#DIV/0!	#DIV/0!	#DIV/0!	#DIV/0!	#DIV/0!	0	0	0	0	0	0	#DIV/0!	#DIV/0!	#DIV/0!	#DIV/0!	#DIV/0!	#DIV/0!	#DIV/0!	0
						#DIV/0!		#DIV/0!															#DIV/0!	#DIV/0!	#DIV/0!	#DIV/0!	#DIV/0!	#DIV/0!	#DIV/0!	#DIV/0!	#DIV/0!	#DIV/0!	#DIV/0!	#DIV/0!	#DIV/0!	0	0	0	0	0	0	#DIV/0!	#DIV/0!	#DIV/0!	#DIV/0!	#DIV/0!	#DIV/0!	#DIV/0!	0
						#DIV/0!		#DIV/0!															#DIV/0!	#DIV/0!	#DIV/0!	#DIV/0!	#DIV/0!	#DIV/0!	#DIV/0!	#DIV/0!	#DIV/0!	#DIV/0!	#DIV/0!	#DIV/0!	#DIV/0!	0	0	0	0	0	0	#DIV/0!	#DIV/0!	#DIV/0!	#DIV/0!	#DIV/0!	#DIV/0!	#DIV/0!	0
						#DIV/0!		#DIV/0!															#DIV/0!	#DIV/0!	#DIV/0!	#DIV/0!	#DIV/0!	#DIV/0!	#DIV/0!	#DIV/0!	#DIV/0!	#DIV/0!	#DIV/0!	#DIV/0!	#DIV/0!	0	0	0	0	0	0	#DIV/0!	#DIV/0!	#DIV/0!	#DIV/0!	#DIV/0!	#DIV/0!	#DIV/0!	0
						#DIV/0!		#DIV/0!															#DIV/0!	#DIV/0!	#DIV/0!	#DIV/0!	#DIV/0!	#DIV/0!	#DIV/0!	#DIV/0!	#DIV/0!	#DIV/0!	#DIV/0!	#DIV/0!	#DIV/0!	0	0	0	0	0	0	#DIV/0!	#DIV/0!	#DIV/0!	#DIV/0!	#DIV/0!	#DIV/0!	#DIV/0!	0
						#DIV/0!		#DIV/0!															#DIV/0!	#DIV/0!	#DIV/0!	#DIV/0!	#DIV/0!	#DIV/0!	#DIV/0!	#DIV/0!	#DIV/0!	#DIV/0!	#DIV/0!	#DIV/0!	#DIV/0!	0	0	0	0	0	0	#DIV/0!	#DIV/0!	#DIV/0!	#DIV/0!	#DIV/0!	#DIV/0!	#DIV/0!	0
						#DIV/0!		#DIV/0!															#DIV/0!	#DIV/0!	#DIV/0!	#DIV/0!	#DIV/0!	#DIV/0!	#DIV/0!	#DIV/0!	#DIV/0!	#DIV/0!	#DIV/0!	#DIV/0!	#DIV/0!	0	0	0	0	0	0	#DIV/0!	#DIV/0!	#DIV/0!	#DIV/0!	#DIV/0!	#DIV/0!	#DIV/0!	0
						#DIV/0!		#DIV/0!															#DIV/0!	#DIV/0!	#DIV/0!	#DIV/0!	#DIV/0!	#DIV/0!	#DIV/0!	#DIV/0!	#DIV/0!	#DIV/0!	#DIV/0!	#DIV/0!	#DIV/0!	0	0	0	0	0	0	#DIV/0!	#DIV/0!	#DIV/0!	#DIV/0!	#DIV/0!	#DIV/0!	#DIV/0!	0
						#DIV/0!		#DIV/0!															#DIV/0!	#DIV/0!	#DIV/0!	#DIV/0!	#DIV/0!	#DIV/0!	#DIV/0!	#DIV/0!	#DIV/0!	#DIV/0!	#DIV/0!	#DIV/0!	#DIV/0!	0	0	0	0	0	0	#DIV/0!	#DIV/0!	#DIV/0!	#DIV/0!	#DIV/0!	#DIV/0!	#DIV/0!	0
						#DIV/0!		#DIV/0!															#DIV/0!	#DIV/0!	#DIV/0!	#DIV/0!	#DIV/0!	#DIV/0!	#DIV/0!	#DIV/0!	#DIV/0!	#DIV/0!	#DIV/0!	#DIV/0!	#DIV/0!	0	0	0	0	0	0	#DIV/0!	#DIV/0!	#DIV/0!	#DIV/0!	#DIV/0!	#DIV/0!	#DIV/0!	0
						#DIV/0!		#DIV/0!															#DIV/0!	#DIV/0!	#DIV/0!	#DIV/0!	#DIV/0!	#DIV/0!	#DIV/0!	#DIV/0!	#DIV/0!	#DIV/0!	#DIV/0!	#DIV/0!	#DIV/0!	0	0	0	0	0	0	#DIV/0!	#DIV/0!	#DIV/0!	#DIV/0!	#DIV/0!	#DIV/0!	#DIV/0!	0
						#DIV/0!		#DIV/0!															#DIV/0!	#DIV/0!	#DIV/0!	#DIV/0!	#DIV/0!	#DIV/0!	#DIV/0!	#DIV/0!	#DIV/0!	#DIV/0!	#DIV/0!	#DIV/0!	#DIV/0!	0	0	0	0	0	0	#DIV/0!	#DIV/0!	#DIV/0!	#DIV/0!	#DIV/0!	#DIV/0!	#DIV/0!	0
						#DIV/0!		#DIV/0!															#DIV/0!	#DIV/0!	#DIV/0!	#DIV/0!	#DIV/0!	#DIV/0!	#DIV/0!	#DIV/0!	#DIV/0!	#DIV/0!	#DIV/0!	#DIV/0!	#DIV/0!	0	0	0	0	0	0	#DIV/0!	#DIV/0!	#DIV/0!	#DIV/0!	#DIV/0!	#DIV/0!	#DIV/0!	0
						#DIV/0!		#DIV/0!															#DIV/0!	#DIV/0!	#DIV/0!	#DIV/0!	#DIV/0!	#DIV/0!	#DIV/0!	#DIV/0!	#DIV/0!	#DIV/0!	#DIV/0!	#DIV/0!	#DIV/0!	0	0	0	0	0	0	#DIV/0!	#DIV/0!	#DIV/0!	#DIV/0!	#DIV/0!	#DIV/0!	#DIV/0!	0
						#DIV/0!		#DIV/0!															#DIV/0!	#DIV/0!	#DIV/0!	#DIV/0!	#DIV/0!	#DIV/0!	#DIV/0!	#DIV/0!	#DIV/0!	#DIV/0!	#DIV/0!	#DIV/0!	#DIV/0!	0	0	0	0	0	0	#DIV/0!	#DIV/0!	#DIV/0!	#DIV/0!	#DIV/0!	#DIV/0!	#DIV/0!	0
						#DIV/0!		#DIV/0!															#DIV/0!	#DIV/0!	#DIV/0!	#DIV/0!	#DIV/0!	#DIV/0!	#DIV/0!	#DIV/0!	#DIV/0!	#DIV/0!	#DIV/0!	#DIV/0!	#DIV/0!	0	0	0	0	0	0	#DIV/0!	#DIV/0!	#DIV/0!	#DIV/0!	#DIV/0!	#DIV/0!	#DIV/0!	0
						#DIV/0!		#DIV/0!															#DIV/0!	#DIV/0!	#DIV/0!	#DIV/0!	#DIV/0!	#DIV/0!	#DIV/0!	#DIV/0!	#DIV/0!	#DIV/0!	#DIV/0!	#DIV/0!	#DIV/0!	0	0	0	0	0	0	#DIV/0!	#DIV/0!	#DIV/0!	#DIV/0!	#DIV/0!	#DIV/0!	#DIV/0!	0
						#DIV/0!		#DIV/0!															#DIV/0!	#DIV/0!	#DIV/0!	#DIV/0!	#DIV/0!	#DIV/0!	#DIV/0!	#DIV/0!	#DIV/0!	#DIV/0!	#DIV/0!	#DIV/0!	#DIV/0!	0	0	0	0	0	0	#DIV/0!	#DIV/0!	#DIV/0!	#DIV/0!	#DIV/0!	#DIV/0!	#DIV/0!	0
						#DIV/0!		#DIV/0!															#DIV/0!	#DIV/0!	#DIV/0!	#DIV/0!	#DIV/0!	#DIV/0!	#DIV/0!	#DIV/0!	#DIV/0!	#DIV/0!	#DIV/0!	#DIV/0!	#DIV/0!	0	0	0	0	0	0	#DIV/0!	#DIV/0!	#DIV/0!	#DIV/0!	#DIV/0!	#DIV/0!	#DIV/0!	0
						#DIV/0!		#DIV/0!															#DIV/0!	#DIV/0!	#DIV/0!	#DIV/0!	#DIV/0!	#DIV/0!	#DIV/0!	#DIV/0!	#DIV/0!	#DIV/0!	#DIV/0!	#DIV/0!	#DIV/0!	0	0	0	0	0	0	#DIV/0!	#DIV/0!	#DIV/0!	#DIV/0!	#DIV/0!	#DIV/0!	#DIV/0!	0
						#DIV/0!		#DIV/0!															#DIV/0!	#DIV/0!	#DIV/0!	#DIV/0!	#DIV/0!	#DIV/0!	#DIV/0!	#DIV/0!	#DIV/0!	#DIV/0!	#DIV/0!	#DIV/0!	#DIV/0!	0	0	0	0	0	0	#DIV/0!	#DIV/0!	#DIV/0!	#DIV/0!	#DIV/0!	#DIV/0!	#DIV/0!	0
						#DIV/0!		#DIV/0!															#DIV/0!	#DIV/0!	#DIV/0!	#DIV/0!	#DIV/0!	#DIV/0!	#DIV/0!	#DIV/0!	#DIV/0!	#DIV/0!	#DIV/0!	#DIV/0!	#DIV/0!	0	0	0	0	0	0	#DIV/0!	#DIV/0!	#DIV/0!	#DIV/0!	#DIV/0!	#DIV/0!	#DIV/0!	0
						#DIV/0!		#DIV/0!															#DIV/0!	#DIV/0!	#DIV/0!	#DIV/0!	#DIV/0!	#DIV/0!	#DIV/0!	#DIV/0!	#DIV/0!	#DIV/0!	#DIV/0!	#DIV/0!	#DIV/0!	0	0	0	0	0	0	#DIV/0!	#DIV/0!	#DIV/0!	#DIV/0!	#DIV/0!	#DIV/0!	#DIV/0!	0
						#DIV/0!		#DIV/0!															#DIV/0!	#DIV/0!	#DIV/0!	#DIV/0!	#DIV/0!	#DIV/0!	#DIV/0!	#DIV/0!	#DIV/0!	#DIV/0!	#DIV/0!	#DIV/0!	#DIV/0!	0	0	0	0	0	0	#DIV/0!	#DIV/0!	#DIV/0!	#DIV/0!	#DIV/0!	#DIV/0!	#DIV/0!	0
						#DIV/0!		#DIV/0!															#DIV/0!	#DIV/0!	#DIV/0!	#DIV/0!	#DIV/0!	#DIV/0!	#DIV/0!	#DIV/0!	#DIV/0!	#DIV/0!	#DIV/0!	#DIV/0!	#DIV/0!	0	0	0	0	0	0	#DIV/0!	#DIV/0!	#DIV/0!	#DIV/0!	#DIV/0!	#DIV/0!	#DIV/0!	0
						#DIV/0!		#DIV/0!															#DIV/0!	#DIV/0!	#DIV/0!	#DIV/0!	#DIV/0!	#DIV/0!	#DIV/0!	#DIV/0!	#DIV/0!	#DIV/0!	#DIV/0!	#DIV/0!	#DIV/0!	0	0	0	0	0	0	#DIV/0!	#DIV/0!	#DIV/0!	#DIV/0!	#DIV/0!	#DIV/0!	#DIV/0!	0
						#DIV/0!		#DIV/0!															#DIV/0!	#DIV/0!	#DIV/0!	#DIV/0!	#DIV/0!	#DIV/0!	#DIV/0!	#DIV/0!	#DIV/0!	#DIV/0!	#DIV/0!	#DIV/0!	#DIV/0!	0	0	0	0	0	0	#DIV/0!	#DIV/0!	#DIV/0!	#DIV/0!	#DIV/0!	#DIV/0!	#DIV/0!	0
						#DIV/0!		#DIV/0!															#DIV/0!	#DIV/0!	#DIV/0!	#DIV/0!	#DIV/0!	#DIV/0!	#DIV/0!	#DIV/0!	#DIV/0!	#DIV/0!	#DIV/0!	#DIV/0!	#DIV/0!	0	0	0	0	0	0	#DIV/0!	#DIV/0!	#DIV/0!	#DIV/0!	#DIV/0!	#DIV/0!	#DIV/0!	0
						#DIV/0!		#DIV/0!															#DIV/0!	#DIV/0!	#DIV/0!	#DIV/0!	#DIV/0!	#DIV/0!	#DIV/0!	#DIV/0!	#DIV/0!	#DIV/0!	#DIV/0!	#DIV/0!	#DIV/0!	0	0	0	0	0	0	#DIV/0!	#DIV/0!	#DIV/0!	#DIV/0!	#DIV/0!	#DIV/0!	#DIV/0!	0
						#DIV/0!		#DIV/0!															#DIV/0!	#DIV/0!	#DIV/0!	#DIV/0!	#DIV/0!	#DIV/0!	#DIV/0!	#DIV/0!	#DIV/0!	#DIV/0!	#DIV/0!	#DIV/0!	#DIV/0!	0	0	0	0	0	0	#DIV/0!	#DIV/0!	#DIV/0!	#DIV/0!	#DIV/0!	#DIV/0!	#DIV/0!	0
[truncated: 204 more rows]
[truncated: 33 more columns]

## Sheet: Site8
Date:	27/8/2014
Site No. :	4V34
								Transect 1a for Col mop seedling (<0.2m)
			Width (m)	Length (m)	Area (ha)			Width (m)	Length (m)	Area (ha)
[truncated: 313 more rows]
[truncated: 33 more columns]
