# Supplementary material for: Emergent trees inColophospermum mopanewoodland: influence of elephant density on persistenceversusattrition
Source: PeerJ journal article supplement (doi:10.7717/peerj.16961), 2024-02-26
Supplement: FigureS1.pdf [file FigureS1.pdf]

|                                                                                     |                                                                                     |                                                                                      |                                                                                       |
|-------------------------------------------------------------------------------------|-------------------------------------------------------------------------------------|--------------------------------------------------------------------------------------|---------------------------------------------------------------------------------------|
| A  | B  | C  | G  |
| D  | E  | F  |                                                                                       |
