# Supplementary material for: Emergent trees inColophospermum mopanewoodland: influence of elephant density on persistenceversusattrition
Source: PeerJ journal article supplement (doi:10.7717/peerj.16961), 2024-02-26

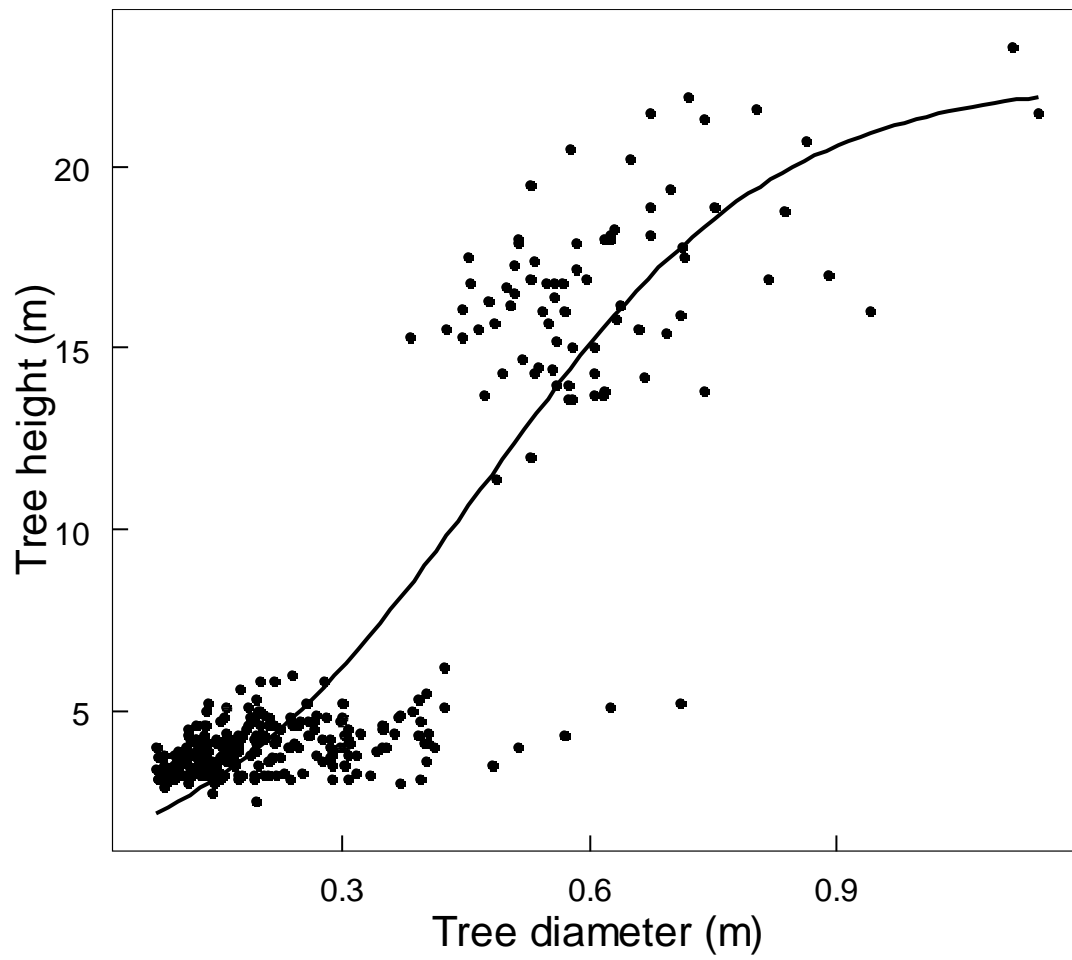

Supplement: FigureS3.pdf [file FigureS3.pdf]
